# Supplementary material for: Copper(i)–catalyzed intramolecular asymmetric C-arylation of acyclic β-ester amides: enantioselective formation of chiral oxindoles
Source: Royal Society of Chemistry journal article supplement (doi:10.1039/d1qo00568e), 2021-01-01
Supplement: d1qo00568e1.pdf [file d1qo00568e1.pdf]

# Copper(I)-Catalyzed Intramolecular Asymmetric C-Arylation of Acyclic $\beta$ -ester amides: Enantioselective Formation of Chiral Oxindoles

Zhuoji Deng, Jiajie Feng, Fengtao Zhou, Yifan Ouyang, Haowen Ma, Wei Zhou, Xinhao Zhang\*, and Qian Cai\*

[weizhou88@jnu.edu.cn](mailto:weizhou88@jnu.edu.cn); [zhangxinhao@pku.edu.cn](mailto:zhangxinhao@pku.edu.cn); [caiqian@jnu.edu.cn](mailto:caiqian@jnu.edu.cn)

## Supporting Information

### Table of Contents

|             |                                                                       |            |
|-------------|-----------------------------------------------------------------------|------------|
| <b>I.</b>   | <b>General Remarks.....</b>                                           | <b>S2</b>  |
| <b>II.</b>  | <b>Synthesis of Substrates.....</b>                                   | <b>S2</b>  |
| <b>III.</b> | <b>General Procedure for Asymmetric Ullmann-Hurtley Coupling.....</b> | <b>S11</b> |
| <b>IV.</b>  | <b>Synthetic Transformations.....</b>                                 | <b>S19</b> |
| <b>V.</b>   | <b>Computational Results.....</b>                                     | <b>S20</b> |
| <b>VI.</b>  | <b>References.....</b>                                                | <b>S42</b> |
| <b>VII.</b> | <b>NMR and HPLC Spectra.....</b>                                      | <b>S42</b> |

## I. General Remarks

<sup>1</sup>H NMR and <sup>13</sup>C NMR spectra were recorded on a Bruker AV-400 or 500 MHz spectrometer. Chemical shifts ( $\delta$ ) are given in relative to tetramethylsilane ( $\delta$  0.00 ppm) in CDCl<sub>3</sub>. Coupling constants, *J*, were reported in hertz unit (Hz). High resolution mass spectra (HRMS) were obtained on a Q-STAR Elite ESI-LC-MS/MS Spectrometer. Chemical names were generated using Cambridge Soft. ChemDraw Ultra 10.0. Optical rotations were measured on a Perkin Elmer 341 polarimeter. Enantiomeric ratios were determined by chiral HPLC using a chiralpak AD-H (Amylose tris (3,5-dimethylphenylcarbamate)coated on 5 $\mu$ m silica-gel), chiralpak AS-H (Amylose tris-[(S)- $\alpha$ -methylbenzylcarbamate] coated on 5 $\mu$ m silica-gel) or chiralcel OD-H column (Cellulose tris (3,5-dimethylphenylcarbamate) coated on 5 $\mu$ m silica-gel) with hexane and *i*-PrOH as solvents. Commercially obtained reagents were used without further purification.

## II. Synthesis of Substrates

### General Procedure for the synthesis of **1a**:

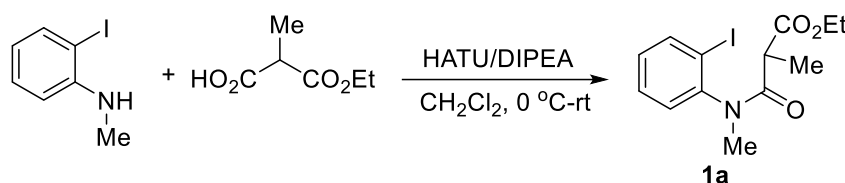

To a solution of 2-iodo-*N*-methylaniline (2.3 g, 10 mmol) in DCM (50 mL) was added 3-ethoxy-2-methyl-3-oxopropanoic acid (1.75 g, 12 mmol), HATU (5.7 g, 15 mmol) and DIPEA (5.1 ml, 30 mmol). The reaction mixture was stirred at room temperature for 24 hours. Then the solvent was evaporated, extracted by DCM, dried over anhydrous NaSO<sub>4</sub>, filtered, and concentrated in vacuo. The resulting residue was purified through column to afford the corresponding products **1a** (2.1 g, 58%). Other substrates were synthesized similarly to that of **1a**.

### *Ethyl 3-((2-iodophenyl)(methyl)amino)-2-methyl-3-oxopropanoate (1a)*

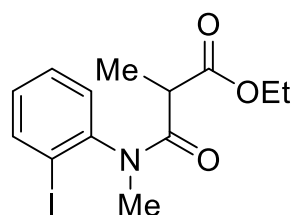

<sup>1</sup>H NMR (400 MHz, CDCl<sub>3</sub>, two rotamers)  $\delta$  7.90-7.96 (m, 1H), 7.33-7.43 & 7.21-7.24 (m, 2H), 7.04-7.10 (m, 1H), 3.99-4.14 (m, 2H), 3.19 (s, 3H), 3.06-3.12 (m, 1H), 1.37 & 1.26 (2d, *J* = 6.8 Hz, 3H), 1.22 & 1.19 (2t, *J* = 6.8 Hz, 3H); <sup>13</sup>C NMR (100 MHz, CDCl<sub>3</sub>, two rotamers)  $\delta$  170.5, 170.3, 170.1, 169.5, 145.5, 140.7, 140.1, 130.1, 129.9, 129.8, 129.1, 99.7, 99.2, 61.2, 44.2, 44.1, 36.4, 36.3, 14.5, 14.2, 14.1; ESI-MS *m/z* 384.0 (M + Na)<sup>+</sup>; HRMS calcd for C<sub>13</sub>H<sub>16</sub>INNaO<sub>3</sub><sup>+</sup> (M + Na)<sup>+</sup> 384.0067, found 384.0065.

### *Methyl 3-((2-iodophenyl)(methyl)amino)-2-methyl-3-oxopropanoate (1b)*

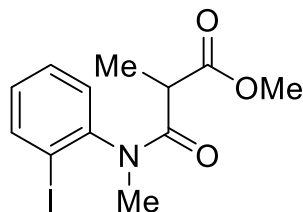

$^1\text{H}$  NMR (400 MHz,  $\text{CDCl}_3$ , two rotamers)  $\delta$  7.90-7.96 (m, 1H), 7.33-7.44 & 7.21-7.24 (m, 2H), 7.06-7.11 (m, 1H), 3.58-3.68 (m, 3H), 3.10-3.21 (m, 4H), 1.26-1.41 (m, 3H);  $^{13}\text{C}$  NMR (100 MHz,  $\text{CDCl}_3$ , two rotamers)  $\delta$  171.0, 170.5, 170.1, 169.5, 145.5, 140.8, 140.2, 130.2, 129.9, 129.8, 129.7, 129.2, 99.6, 99.2, 52.3, 52.2, 44.0, 36.5, 36.4, 14.5; ESI-MS  $m/z$  370.0 ( $\text{M} + \text{Na}$ ) $^+$ ; HRMS calcd for  $\text{C}_{12}\text{H}_{14}\text{INNaO}_3^+$  ( $\text{M} + \text{Na}$ ) $^+$  369.9911, found 369.9910.

***Isopropyl 3-((2-iodophenyl)(methyl)amino)-2-methyl-3-oxopropanoate (1c)***

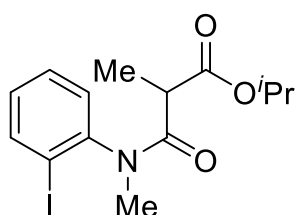

$^1\text{H}$  NMR (400 MHz,  $\text{CDCl}_3$ , two rotamers)  $\delta$  7.86-7.92 (m, 1H), 7.22-7.38 (m, 2H), 7.02-7.06 (m, 1H), 4.81-4.96 (m, 1H), 3.14 (s, 3H), 2.99-3.05 (m, 1H), 1.10-1.35 (m, 9H);  $^{13}\text{C}$  NMR (100 MHz,  $\text{CDCl}_3$ , two rotamers)  $\delta$  170.4, 170.0, 169.6, 169.5, 145.5, 140.7, 140.1, 130.1, 129.9, 129.8, 129.7, 129.0, 99.7, 99.2, 68.6, 44.3, 36.3, 21.8, 21.7, 21.6, 21.5, 14.5, 14.4; ESI-MS  $m/z$  398.0 ( $\text{M} + \text{Na}$ ) $^+$ ; HRMS calcd for  $\text{C}_{14}\text{H}_{18}\text{INaNO}_3^+$  ( $\text{M} + \text{Na}$ ) $^+$  398.0224, found 398.0224.

***tert-Butyl 3-((2-iodophenyl)(methyl)amino)-2-methyl-3-oxopropanoate (1d)***

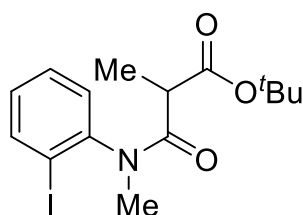

$^1\text{H}$  NMR (400 MHz,  $\text{CDCl}_3$ , two rotamers)  $\delta$  7.92-7.98 (m, 1H), 7.37-7.44 & 7.23-7.24 (m, 2H), 7.06-7.11 (m, 1H), 3.20 (s, 3H), 2.97-3.04 (m, 1H), 1.44 & 1.40 (2s, 9H), 1.36 & 1.22 (2d,  $J = 7.2$  Hz, 3H);  $^{13}\text{C}$  NMR (100 MHz,  $\text{CDCl}_3$ , two rotamers)  $\delta$  170.9, 169.9, 169.8, 169.3, 145.8, 145.7, 140.7, 140.1, 130.1, 130.0, 129.9, 129.7, 129.1, 99.8, 99.5, 81.4, 81.3, 45.0, 36.4, 36.3, 28.1, 27.9, 14.6; ESI-MS  $m/z$  412.0 ( $\text{M} + \text{Na}$ ) $^+$ ; HRMS calcd for  $\text{C}_{15}\text{H}_{20}\text{INNaO}_3^+$  ( $\text{M} + \text{Na}$ ) $^+$  412.0380, found 412.0379.

***tert-Butyl 3-(allyl(2-iodophenyl)amino)-2-methyl-3-oxopropanoate (1e)***

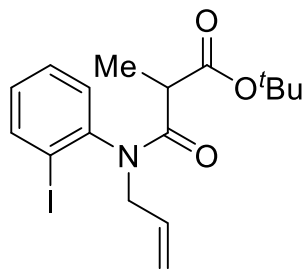

$^1\text{H}$  NMR (400 MHz,  $\text{CDCl}_3$ , two rotamers)  $\delta$  7.91-7.98 (m, 1H), 7.28-7.35 (m, 2H), 7.05-7.11 (m, 1H), 5.87-5.91 (m, 1H), 5.07-5.12 (m, 2H), 4.86-4.92 (m, 1H), 3.46-3.57 (m, 1H), 2.93-3.00 (m, 1H), 1.43 & 1.39 (2s, 9H), 1.34 & 1.19 (2d,  $J = 6.8$  Hz, 3H);  $^{13}\text{C}$  NMR (100 MHz,  $\text{CDCl}_3$ , two rotamers)  $\delta$  170.6, 169.7, 169.5, 169.3, 143.9, 143.6, 140.6, 140.1, 132.3, 132.2, 131.3, 130.8, 130.1, 129.2, 129.1, 118.9, 118.5, 100.9, 100.5, 81.5, 81.3, 51.5, 51.3, 45.3, 45.1, 28.1, 27.9, 14.6, 14.4; ESI-MS  $m/z$  438.0 ( $\text{M} + \text{Na}$ ) $^+$ ; HRMS calcd for  $\text{C}_{17}\text{H}_{22}\text{INNaO}_3^+$  ( $\text{M} + \text{Na}$ ) $^+$  438.0537, found 438.0538.

***tert-Butyl 3-(benzyl(2-iodophenyl)amino)-2-methyl-3-oxopropanoate (1f)***

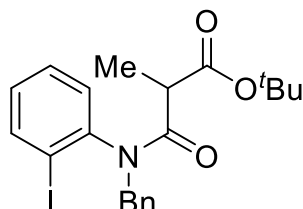

$^1\text{H}$  NMR (400 MHz,  $\text{CDCl}_3$ , two rotamers)  $\delta$  7.93-8.00 (m, 1H), 7.24-7.26 (m, 5H), 7.16-7.20 (m, 1H), 7.03-7.06 (m, 1H), 6.83-6.85 & 6.64-6.67 (m, 1H), 5.71-5.80 (m, 1H), 3.82-3.91 (m, 1H), 2.97-3.03 (m, 1H), 1.19-1.48 (m, 12H);  $^{13}\text{C}$  NMR (100 MHz,  $\text{CDCl}_3$ , two rotamers)  $\delta$  169.9, 169.6, 169.3, 168.5, 143.6, 143.3, 140.7, 140.1, 136.9, 131.5, 131.0, 130.1, 129.4, 129.3, 128.9, 128.5, 128.3, 127.6, 127.5, 100.5, 100.3, 81.5, 81.4, 51.8, 51.6, 45.3, 45.0, 28.2, 27.9, 14.5, 14.4; ESI-MS  $m/z$  488.1 ( $\text{M} + \text{Na}$ ) $^+$ ; HRMS calcd for  $\text{C}_{21}\text{H}_{24}\text{INNaO}_3^+$  ( $\text{M} + \text{Na}$ ) $^+$  488.0693, found 488.0692.

***tert-Butyl 3-((2-iodo-4-methoxyphenyl)(methyl)amino)-2-methyl-3-oxopropanoate (1g)***

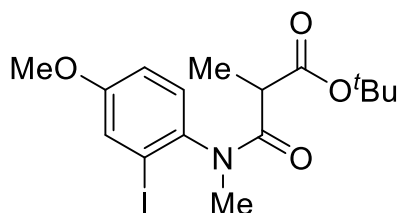

$^1\text{H}$  NMR (400 MHz,  $\text{CDCl}_3$ , two rotamers)  $\delta$  7.45 & 7.41 (2d,  $J = 2.4$  Hz, 1H), 7.25 & 7.13 (2d,  $J = 8.0$  Hz, 1H), 6.89-6.93 (m, 1H), 3.81 (s, 3H), 3.17 (s, 3H), 3.00-3.09 (m, 1H), 1.44 & 1.40 (2s, 9H), 1.34 & 1.21 (2d,  $J = 6.8$  Hz, 3H);  $^{13}\text{C}$  NMR (100 MHz,  $\text{CDCl}_3$ , two rotamers)  $\delta$  171.4, 170.3, 169.9, 169.5, 159.5, 138.6, 129.8, 129.1, 125.2, 124.6, 115.4, 115.3, 100.0, 99.7, 81.3, 81.2, 55.8, 44.9, 44.8, 36.6, 36.5, 28.2, 28.0, 14.5; ESI-MS  $m/z$  442.0 ( $\text{M} + \text{Na}$ ) $^+$ ; HRMS calcd for  $\text{C}_{16}\text{H}_{22}\text{INNaO}_4^+$  ( $\text{M} + \text{Na}$ ) $^+$  442.0486, found 442.0484.

***tert-Butyl 3-((2-iodo-4-methylphenyl)(methyl)amino)-2-methyl-3-oxopropanoate (1h)***



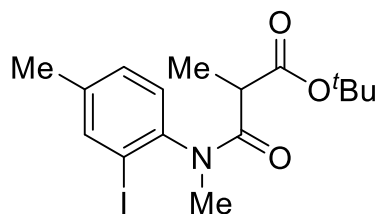

$^1\text{H}$  NMR (400 MHz,  $\text{CDCl}_3$ , two rotamers)  $\delta$  7.79 & 7.75 (2d,  $J = 1.2$  Hz, 1H), 7.10-7.26 (m, 2H), 3.18 & 3.17 (2s, 3H), 3.01-3.07 (m, 1H), 2.35 (s, 3H), 1.49 & 1.40 (2s, 9H), 1.35 & 1.21 (2d,  $J = 6.8$  Hz, 3H);  $^{13}\text{C}$  NMR (100 MHz,  $\text{CDCl}_3$ , two rotamers)  $\delta$  171.1, 170.1, 169.8, 169.4, 143.2, 143.1, 141.0, 140.4, 130.4, 129.2, 128.5, 99.5, 99.2, 81.3, 81.2, 45.0, 44.8, 36.4, 36.3, 28.2, 28.0, 20.6, 20.5, 14.6, 14.5; ESI-MS  $m/z$  426.0 ( $\text{M} + \text{Na}$ ) $^+$ ; HRMS calcd for  $\text{C}_{16}\text{H}_{22}\text{INNaO}_3^+$  ( $\text{M} + \text{Na}$ ) $^+$  426.0537, found 426.0537.

***tert-Butyl 3-((4-(tert-butyl)-2-iodophenyl)(methyl)amino)-2-methyl-3-oxopropanoate (1i)***

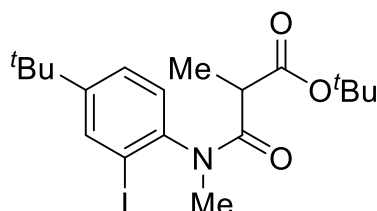

$^1\text{H}$  NMR (400 MHz,  $\text{CDCl}_3$ , two rotamers)  $\delta$  7.93 & 7.89 (2d,  $J = 2.0$  Hz, 1H), 7.38-7.42 (m, 1H), 7.28 & 7.15 (2d,  $J = 8.0$  Hz, 1H), 3.19 & 3.18 (2s, 3H), 3.01-3.07 (m, 1H), 1.46 & 1.40 (2s, 9H), 1.37 & 1.23 (2d,  $J = 7.2$  Hz, 3H), 1.30 (s, 9H);  $^{13}\text{C}$  NMR (100 MHz,  $\text{CDCl}_3$ , two rotamers)  $\delta$  170.0, 169.5, 153.7, 153.6, 143.1, 143.0, 137.7, 137.0, 129.1, 126.9, 99.7, 99.3, 81.3, 81.0, 45.0, 44.9, 36.4, 36.3, 34.7, 31.2, 28.2, 28.0, 14.6, 14.5; ESI-MS  $m/z$  468.1 ( $\text{M} + \text{Na}$ ) $^+$ ; HRMS calcd for  $\text{C}_{19}\text{H}_{28}\text{INNaO}_3^+$  ( $\text{M} + \text{Na}$ ) $^+$  468.1006, found 468.1008.

***tert-Butyl 3-((4-bromo-2-iodophenyl)(methyl)amino)-2-methyl-3-oxopropanoate (1j)***

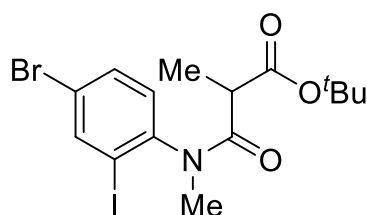

$^1\text{H}$  NMR (400 MHz,  $\text{CDCl}_3$ , two rotamers)  $\delta$  8.10 & 8.06 (2d,  $J = 2.0$  Hz, 1H), 7.51-7.55 (m, 1H), 7.25 & 7.11 (2d,  $J = 8.4$  Hz, 1H), 3.17 (s, 3H), 2.96-3.02 (m, 1H), 1.44 & 1.40 (2s, 9H), 1.35 & 1.21 (2d,  $J = 7.2$  Hz, 3H), 1.30 (s, 9H);  $^{13}\text{C}$  NMR (100 MHz,  $\text{CDCl}_3$ , two rotamers)  $\delta$  170.0, 169.7, 169.5, 169.1, 145.0, 144.9, 142.7, 142.1, 132.9, 130.8, 130.0, 122.9, 122.8, 100.7, 100.4, 81.6, 81.5, 45.1, 45.0, 36.3, 36.2, 28.1, 27.9, 14.6, 14.5; ESI-MS  $m/z$  490.0 ( $\text{M} + \text{Na}$ ) $^+$ ; HRMS calcd for  $\text{C}_{15}\text{H}_{19}\text{BrINNaO}_3^+$  ( $\text{M} + \text{Na}$ ) $^+$  489.9485, found 489.9489.

***tert-Butyl 3-((4-cyano-2-iodophenyl)(methyl)amino)-2-methyl-3-oxopropanoate (1k)***

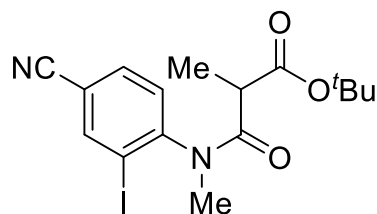

$^1\text{H}$  NMR (400 MHz,  $\text{CDCl}_3$ , two rotamers)  $\delta$  8.26 & 8.22 (2d,  $J = 2.0$  Hz, 1H), 7.67-7.75 (m, 1H), 7.51 & 7.36 (2d,  $J = 8.0$  Hz, 1H), 3.20 (s, 3H), 2.89-2.95 (m, 1H), 0.88-1.50 (m, 12H);  $^{13}\text{C}$  NMR (100 MHz,  $\text{CDCl}_3$ , two rotamers)  $\delta$  170.3, 170.1, 169.3, 169.2, 150.0, 149.9, 144.0, 143.3, 133.3, 130.6, 129.8, 116.1, 114.1, 100.5, 100.1, 81.9, 81.7, 45.4, 45.3, 36.3, 36.2, 28.1, 27.9, 14.6, 14.5; ESI-MS  $m/z$  437.0 ( $\text{M} + \text{Na}$ ) $^+$ ; HRMS calcd for  $\text{C}_{16}\text{H}_{19}\text{IN}_2\text{NaO}_3^+$  ( $\text{M} + \text{Na}$ ) $^+$  437.0333, found 437.0334.

***tert-Butyl 3-((2-iodo-4-(trifluoromethyl)phenyl)(methyl)amino)-2-methyl-3-oxopropanoate (1l)***

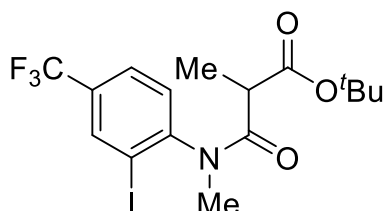

$^1\text{H}$  NMR (400 MHz,  $\text{CDCl}_3$ , two rotamers)  $\delta$  8.20 & 8.16 (2s, 1H), 7.62-7.70 (m, 1H), 7.36-7.62 (m, 1H), 3.19 (s, 3H), 2.91-3.00 (m, 1H), 1.42 & 1.38 (2s, 9H), 1.35 & 1.21 (2d,  $J = 6.8$  Hz, 3H);  $^{13}\text{C}$  NMR (100 MHz,  $\text{CDCl}_3$ , two rotamers)  $\delta$  170.4, 169.4, 169.3, 168.8, 149.1, 149.0, 137.7, 137.1 (q,  $J = 3.0$  Hz), 132.0 (q,  $J = 33.0$  Hz), 130.3, 129.5, 126.8 (q,  $J = 3.0$  Hz), 122.4 (q,  $J = 271.0$  Hz), 100.1, 99.7, 81.7, 81.5, 45.2, 36.2, 28.1, 27.9, 14.6, 14.5; ESI-MS  $m/z$  480.0 ( $\text{M} + \text{Na}$ ) $^+$ ; HRMS calcd for  $\text{C}_{16}\text{H}_{19}\text{F}_3\text{INNaO}_3^+$  ( $\text{M} + \text{Na}$ ) $^+$  480.0254, found 480.0254.

***tert-Butyl 3-((2-iodo-4-nitrophenyl)(methyl)amino)-2-methyl-3-oxopropanoate (1m)***

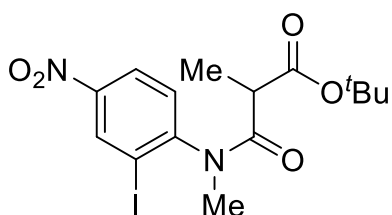

$^1\text{H}$  NMR (400 MHz,  $\text{CDCl}_3$ , two rotamers)  $\delta$  8.80 & 8.76 (2d,  $J = 2.4$  Hz, 1H), 8.25-8.30 (m, 1H), 7.57 & 7.43 (2d,  $J = 8.4$  Hz, 1H), 3.22 (s, 3H), 2.89-2.95 (m, 1H), 1.44 & 1.40 (2s, 9H), 1.36 & 1.23 (2d,  $J = 6.8$  Hz, 3H);  $^{13}\text{C}$  NMR (100 MHz,  $\text{CDCl}_3$ , two rotamers)  $\delta$  170.1, 169.2, 169.1, 168.6, 151.5, 151.4, 147.3, 135.7, 135.1, 130.4, 129.6, 124.8, 124.7, 100.1, 100.0, 82.0, 81.8, 45.5, 45.3, 36.3, 36.2, 28.1, 27.9, 14.6, 14.5; ESI-MS  $m/z$  457.0 ( $\text{M} + \text{Na}$ ) $^+$ ; HRMS calcd for  $\text{C}_{15}\text{H}_{19}\text{IN}_2\text{NaO}_5^+$  ( $\text{M} + \text{Na}$ ) $^+$  457.0231, found 457.0230.

***tert-Butyl 3-((2-iodo-5-methylphenyl)(methyl)amino)-2-methyl-3-oxopropanoate (1n)***

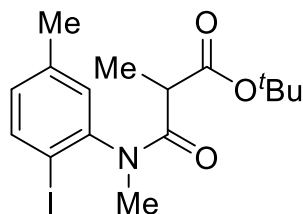

$^1\text{H}$  NMR (400 MHz,  $\text{CDCl}_3$ , two rotamers)  $\delta$  7.81 & 7.77 (2d,  $J$  = 8.0 Hz, 1H), 7.20 & 7.05 (2d,  $J$  = 1.6 Hz, 1H), 6.89-6.92 (m, 1H), 3.18 & 3.17 (2s, 3H), 3.01-3.07 (m, 1H), 2.33 & 2.31 (2s, 3H), 1.45 & 1.41 (2s, 9H), 1.36 & 1.22 (2d,  $J$  = 6.8 Hz, 3H);  $^{13}\text{C}$  NMR (100 MHz,  $\text{CDCl}_3$ , two rotamers)  $\delta$  170.9, 170.0, 169.4, 145.5, 145.4, 140.2, 140.1, 139.7, 131.1, 131.0, 130.5, 129.8, 95.4, 95.0, 81.3, 81.2, 45.0, 44.9, 36.4, 36.3, 28.1, 28.0, 20.9, 20.8, 14.6, 14.5; ESI-MS  $m/z$  426.0 ( $\text{M} + \text{Na}$ ) $^+$ ; HRMS calcd for  $\text{C}_{16}\text{H}_{22}\text{INNaO}_3^+$  ( $\text{M} + \text{Na}$ ) $^+$  426.0537, found 426.0538.

***tert-Butyl 3-((5-chloro-2-iodophenyl)(methylamino)-2-methyl-3-oxopropanoate (1o)***

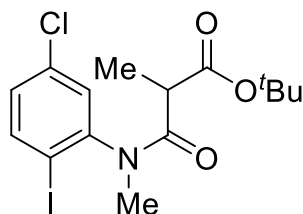

$^1\text{H}$  NMR (400 MHz,  $\text{CDCl}_3$ , two rotamers)  $\delta$  7.88 & 7.84 (2d,  $J$  = 8.4 Hz, 1H), 7.40 & 7.25 (2d,  $J$  = 2.4 Hz, 1H), 7.10 (dd,  $J$  = 8.4 Hz, 2.4 Hz, 1H), 3.18 (s, 3H), 2.96-3.01 (m, 1H), 1.44 & 1.43 (2s, 9H), 1.36 & 1.24 (2d,  $J$  = 6.8 Hz, 3H);  $^{13}\text{C}$  NMR (100 MHz,  $\text{CDCl}_3$ , two rotamers)  $\delta$  170.6, 169.6, 169.5, 169.0, 146.9, 146.8, 141.4, 140.7, 135.5, 135.4, 130.4, 130.3, 130.2, 129.4, 97.2, 96.9, 81.8, 81.2, 45.1, 45.0, 36.3, 36.2, 28.1, 28.0, 14.6, 14.5; ESI-MS  $m/z$  446.0 ( $\text{M} + \text{Na}$ ) $^+$ ; HRMS calcd for  $\text{C}_{15}\text{H}_{19}\text{ClINNaO}_3^+$  ( $\text{M} + \text{Na}$ ) $^+$  445.9990, found 445.9992.

***tert-Butyl 3-((5-fluoro-2-iodophenyl)(methylamino)-2-methyl-3-oxopropanoate (1p)***

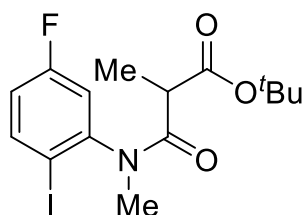

$^1\text{H}$  NMR (400 MHz,  $\text{CDCl}_3$ , two rotamers)  $\delta$  7.85-7.93 (m, 1H), 7.14-7.17 & 7.00-7.03 (m, 1H), 6.87-6.90 (m, 1H), 3.19 (s, 3H), 2.96-3.01 (m, 1H), 1.44 & 1.41 (2s, 9H), 1.36 & 1.24 (2d,  $J$  = 7.2 Hz, 3H);  $^{13}\text{C}$  NMR (100 MHz,  $\text{CDCl}_3$ , two rotamers)  $\delta$  170.6, 169.6, 169.5, 169.0, 163.2 (d,  $J$  = 250 Hz), 147.1, 147.0, 141.4 (d,  $J$  = 9.0 Hz), 140.8 (d,  $J$  = 8.0 Hz), 117.9, 117.8, 117.7, 117.6, 116.9, 116.7, 93.1, 81.8, 81.5, 45.1, 36.3, 36.1, 28.1, 27.9, 14.6, 14.5; ESI-MS  $m/z$  430.0 ( $\text{M} + \text{Na}$ ) $^+$ ; HRMS calcd for  $\text{C}_{15}\text{H}_{19}\text{FINNaO}_3^+$  ( $\text{M} + \text{Na}$ ) $^+$  430.0286, found 430.0288.

***Methyl 3-(3-(tert-butoxy)-N,2-dimethyl-3-oxopropanamido)-4-iodobenzoate (1q)***

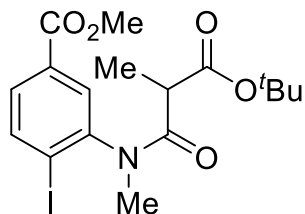

$^1\text{H}$  NMR (400 MHz,  $\text{CDCl}_3$ , two rotamers)  $\delta$  8.00-8.05 (m, 2H), 7.85-7.88 & 7.69-7.73 (m, 1H), 3.88-3.91 (m, 3H), 3.20 & 3.19 (2s, 3H), 2.92-2.98 (m, 1H), 1.42 & 1.40 (2s, 9H), 1.19-1.39 (m, 3H);  $^{13}\text{C}$  NMR (100 MHz,  $\text{CDCl}_3$ , two rotamers)  $\delta$  170.6, 169.7, 169.4, 169.0, 165.4, 165.3, 146.2, 146.1, 141.0, 140.4, 132.2, 132.1, 130.6, 130.5, 130.4, 129.8, 106.4, 106.0, 81.7, 81.4, 52.6, 52.4, 45.1, 44.9, 36.4, 36.3, 28.1, 27.8, 14.5, 14.4; ESI-MS  $m/z$  470.0 ( $\text{M} + \text{Na}$ ) $^+$ ; HRMS calcd for  $\text{C}_{17}\text{H}_{22}\text{INNaO}_5^+$  ( $\text{M} + \text{Na}$ ) $^+$  470.0435, found 470.0436.

***tert-Butyl 3-((2-iodo-3-methylphenyl)(methyl)amino)-2-methyl-3-oxopropanoate (1r)***

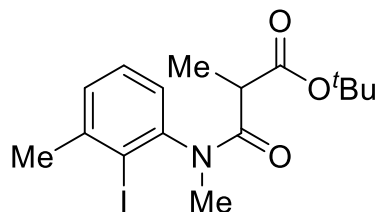

$^1\text{H}$  NMR (400 MHz,  $\text{CDCl}_3$ , two rotamers)  $\delta$  7.20-7.28 (m, 2H), 7.16-7.19 & 7.03-7.05 (m, 1H), 3.19 & 3.18 (2s, 3H), 3.00-3.04 (m, 1H), 2.54 & 2.52 (2s, 3H), 1.50 & 1.44 (2s, 9H), 1.35 & 1.21 (2d,  $J = 6.8$  Hz, 3H);  $^{13}\text{C}$  NMR (100 MHz,  $\text{CDCl}_3$ , two rotamers)  $\delta$  169.9, 169.8, 169.4, 146.2, 146.1, 144.9, 144.5, 129.5, 129.0, 126.8, 126.1, 106.9, 106.7, 81.9, 81.2, 45.1, 45.0, 36.3, 36.2, 29.5, 29.4, 28.1, 27.9, 14.6; ESI-MS  $m/z$  426.0 ( $\text{M} + \text{Na}$ ) $^+$ ; HRMS calcd for  $\text{C}_{16}\text{H}_{22}\text{INNaO}_3^+$  ( $\text{M} + \text{Na}$ ) $^+$  426.0537, found 426.0537.

***tert-Butyl 3-((2,3-diiodophenyl)(methyl)amino)-2-methyl-3-oxopropanoate (1s)***

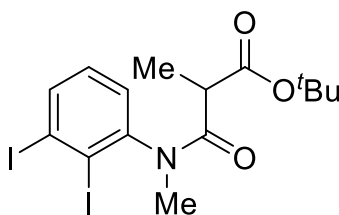

$^1\text{H}$  NMR (400 MHz,  $\text{CDCl}_3$ , two rotamers)  $\delta$  7.85-7.89 (m, 1H), 7.32-7.34 & 7.11-7.21 (m, 2H), 3.17 & 3.16 (2s, 3H), 2.98-3.03 (m, 1H), 1.50 & 1.45 (2s, 9H), 1.36 & 1.21 (2d,  $J = 6.8$  Hz, 3H);  $^{13}\text{C}$  NMR (100 MHz,  $\text{CDCl}_3$ , two rotamers)  $\delta$  170.5, 169.6, 169.4, 169.1, 147.1, 139.6, 139.5, 130.7, 128.7, 128.0, 114.8, 114.6, 110.2, 109.7, 81.5, 81.4, 45.2, 36.3, 36.2, 28.2, 27.9, 14.6; ESI-MS  $m/z$  538.0 ( $\text{M} + \text{Na}$ ) $^+$ ; HRMS calcd for  $\text{C}_{15}\text{H}_{19}\text{I}_2\text{NNaO}_3^+$  ( $\text{M} + \text{Na}$ ) $^+$  537.9347, found 537.9348.

***tert-Butyl 3-((2-iodo-6-methylphenyl)(methyl)amino)-2-methyl-3-oxopropanoate (1t)***

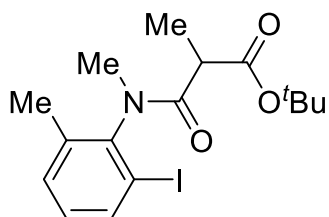

$^1\text{H}$  NMR (400 MHz,  $\text{CDCl}_3$ , two rotamers)  $\delta$  7.75 (d,  $J = 8.0$  Hz, 1H), 7.25-7.27 (m, 1H), 6.95-6.99 (m, 1H), 3.16 (s, 3H), 3.01 (q,  $J = 6.8$  Hz, 1H), 2.38 (s, 3H), 1.39 (s, 9H), 1.19-1.38 (m, 3H);  $^{13}\text{C}$  NMR (100 MHz,  $\text{CDCl}_3$ , two rotamers)  $\delta$  170.3, 170.2, 169.7, 144.0, 138.9, 137.9, 131.6, 130.0, 100.4, 81.3, 45.8, 45.2, 34.9, 34.8, 28.0, 27.9, 20.1, 19.2, 15.2, 14.4; ESI-MS  $m/z$  426.0 ( $\text{M} + \text{Na}$ ) $^+$ ; HRMS calcd for  $\text{C}_{16}\text{H}_{22}\text{INNaO}_3^+$  ( $\text{M} + \text{Na}$ ) $^+$  426.0537, found 426.0537.

***tert-Butyl 2-((2-iodophenyl)(methyl)carbamoyl)pentanoate (1u)***

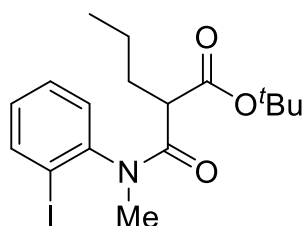

$^1\text{H}$  NMR (400 MHz,  $\text{CDCl}_3$ , two rotamers)  $\delta$  7.91-7.94 (m, 1H), 7.31-7.43 & 7.20-7.23 (m, 2H), 7.05-7.09 (m, 1H), 3.18 (s, 3H), 2.85-2.94 (m, 1H), 1.73-1.90 (m, 2H), 1.49 & 1.43 (2s, 9H), 1.30-1.37 (m, 2H), 0.83 & 0.71 (2t,  $J = 7.2$  Hz, 3H);  $^{13}\text{C}$  NMR (100 MHz,  $\text{CDCl}_3$ , two rotamers)  $\delta$  169.5, 168.8, 168.5, 145.6, 145.5, 140.6, 140.2, 130.0, 129.9, 129.7, 129.6, 129.4, 99.7, 99.6, 81.3, 51.1, 50.4, 36.4, 36.3, 32.2, 32.0, 28.1, 27.9, 21.5, 21.0, 14.0, 13.7; ESI-MS  $m/z$  440.1 ( $\text{M} + \text{Na}$ ) $^+$ ; HRMS calcd for  $\text{C}_{17}\text{H}_{24}\text{INNaO}_3^+$  ( $\text{M} + \text{Na}$ ) $^+$  440.0693, found 440.0692.

***tert-Butyl 2-((2-iodophenyl)(methyl)carbamoyl)octanoate (1v)***

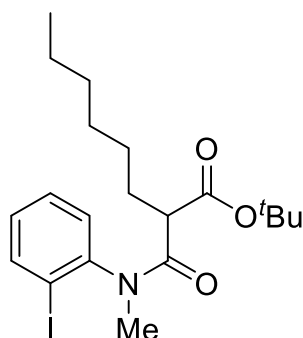

$^1\text{H}$  NMR (400 MHz,  $\text{CDCl}_3$ , two rotamers)  $\delta$  7.88-7.94 (m, 1H), 7.29-7.40 & 7.18-7.23 (m, 2H), 7.03-7.07 (m, 1H), 3.15 (s, 3H), 2.81-2.89 (m, 1H), 1.71-1.90 (m, 2H), 1.47 & 1.40 (2s, 9H), 1.18-1.34 (m, 8H), 0.76-0.81 (m, 3H);  $^{13}\text{C}$  NMR (100 MHz,  $\text{CDCl}_3$ , two rotamers)  $\delta$  169.5, 169.4, 168.8, 168.4, 145.6, 145.5, 140.6, 140.2, 130.0, 129.9, 129.7, 129.6, 129.3, 99.7, 99.6, 81.3, 81.2, 51.3, 50.6, 36.3, 31.5, 31.4, 30.1, 29.9, 29.1, 28.8, 28.2, 28.1, 27.9, 27.7, 22.6, 22.5, 14.1, 14.0; ESI-MS  $m/z$  482.1 ( $\text{M} + \text{Na}$ ) $^+$ ; HRMS calcd for  $\text{C}_{20}\text{H}_{30}\text{INNaO}_3^+$  ( $\text{M} + \text{Na}$ ) $^+$  482.1163, found 482.1164.

***tert-Butyl 3-((2-iodophenyl)(methyl)amino)-3-oxo-2-phenylpropanoate (1w)***

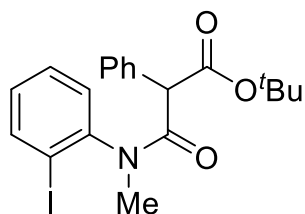

$^1\text{H}$  NMR (400 MHz,  $\text{CDCl}_3$ , two rotamers)  $\delta$  7.91-7.96 (m, 1H), 7.40-7.45 (m, 1H), 7.21-7.24 (m, 4H), 6.97-7.20 & 6.44-6.46 (m, 3H), 4.25 & 4.13 (2s, 1H), 3.18 & 3.15 (2s, 3H), 1.45 & 1.37 (2s, 9H);  $^{13}\text{C}$  NMR (100 MHz,  $\text{CDCl}_3$ , two rotamers)  $\delta$  168.0, 167.9, 167.6, 167.4, 145.6, 144.9, 140.4, 140.1, 133.7, 133.6, 130.5, 130.2, 130.1, 130.0, 129.9, 129.8, 129.4, 129.2, 128.2, 128.1, 127.7, 100.1, 99.5, 82.0, 81.9, 58.0, 57.2, 36.5, 36.4, 28.1, 27.9; ESI-MS  $m/z$  474.0 ( $\text{M} + \text{Na}$ ) $^+$ ; HRMS calcd for  $\text{C}_{20}\text{H}_{22}\text{INNaO}_3^+$  ( $\text{M} + \text{Na}$ ) $^+$  474.0537, found 474.0535.

***tert-Butyl 2-((2-iodophenyl)(methyl)carbamoyl)pent-4-enoate (1x)***

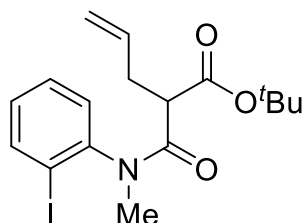

$^1\text{H}$  NMR (400 MHz,  $\text{CDCl}_3$ , two rotamers)  $\delta$  7.92-7.96 (m, 1H), 7.26-7.41 (m, 2H), 7.08-7.13 (m, 1H), 5.62-5.83 (m, 1H), 4.90-5.08 (m, 2H), 3.18-3.22 (m, 3H), 2.93-3.04 (m, 1H), 2.59-2.64 & 2.37-2.42 (m, 2H), 1.38-1.43 (m, 9H);  $^{13}\text{C}$  NMR (100 MHz,  $\text{CDCl}_3$ , two rotamers)  $\delta$  168.9, 168.6, 168.2, 167.8, 145.4, 140.6, 140.2, 135.6, 135.0, 130.1, 130.0, 129.7, 129.6, 129.5, 117.0, 99.6, 81.6, 51.1, 50.4, 36.5, 36.4, 34.1, 28.1, 27.9; ESI-MS  $m/z$  438.1 ( $\text{M} + \text{Na}$ ) $^+$ ; HRMS calcd for  $\text{C}_{17}\text{H}_{22}\text{INNaO}_3^+$  ( $\text{M} + \text{Na}$ ) $^+$  438.0537, found 438.0538.

***tert-Butyl 2-benzyl-3-((2-iodophenyl)(methyl)amino)-3-oxopropanoate (1y)***

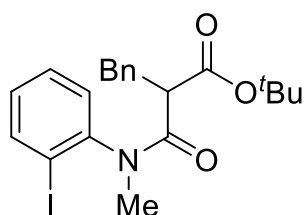

$^1\text{H}$  NMR (400 MHz,  $\text{CDCl}_3$ , two rotamers)  $\delta$  7.90-7.94 (m, 1H), 6.98-7.40 (m, 8H), 3.09-3.27 (m, 6H), 1.30-1.42 (m, 9H);  $^{13}\text{C}$  NMR (100 MHz,  $\text{CDCl}_3$ , two rotamers)  $\delta$  168.5, 168.4, 168.1, 167.8, 145.4, 140.4, 140.2, 139.1, 138.7, 130.0, 129.9, 129.7, 129.6, 129.5, 129.3, 128.4, 128.2, 126.6, 126.3, 99.6, 99.4, 81.7, 81.6, 53.4, 52.4, 36.5, 36.4, 35.7, 28.1, 27.8; ESI-MS  $m/z$  488.1 ( $\text{M} + \text{Na}$ ) $^+$ ; HRMS calcd for  $\text{C}_{21}\text{H}_{24}\text{INNaO}_3^+$  ( $\text{M} + \text{Na}$ ) $^+$  488.0693, found 488.0693.

***tert-Butyl 4-(benzyloxy)-2-((2-iodo-4-methoxyphenyl)(methyl)carbamoyl)butanoate (3)***

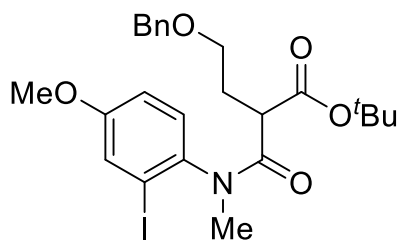

$^1\text{H}$  NMR (400 MHz,  $\text{CDCl}_3$ , two rotamers)  $\delta$  7.08-7.37 (m, 7H), 6.88 & 6.74 (2dd,  $J = 8.8$  Hz, 2.8 Hz, 1H), 4.33-4.49 (m, 2H), 3.78 & 3.72 (2s, 3H), 3.48-3.52 & 3.19-3.23 (m, 3H), 3.18 & 3.14 (2s, 3H), 2.09-2.31 (m, 2H), 1.43 & 1.38 (2s, 9H);  $^{13}\text{C}$  NMR (100 MHz,  $\text{CDCl}_3$ , two rotamers)  $\delta$  169.7, 169.3, 169.2, 168.5, 159.5, 159.4, 138.6, 138.3, 129.9, 129.7, 128.3, 128.2, 127.5, 127.4, 127.3, 125.2, 124.7, 115.3, 115.1, 99.9, 99.5, 81.5, 81.4, 72.5, 68.2, 67.9, 55.8, 55.7, 47.5, 47.3, 36.7, 30.1, 29.8, 28.2, 27.9; ESI-MS  $m/z$  562.1 ( $\text{M} + \text{Na}$ ) $^+$ ; HRMS calcd for  $\text{C}_{24}\text{H}_{30}\text{INNaO}_5^+$  ( $\text{M} + \text{Na}$ ) $^+$  562.1061, found 562.1061.

### III. General Procedure for Asymmetric Ullmann-Hurtley Coupling:

The reaction mixture of substrates (0.2 mmol), CuI (0.02 mmol), (*S, S*)-L2 (0.04 mmol) and *t*-BuOLi (0.3 mmol) in MeCN (2 mL) were stirred at room temperature for 12 hours. Then  $\text{H}_2\text{O}$  (5.0 mL) and ethyl acetate (5.0 mL) were added into the mixture. The organic phase was separated and the aqueous phase was extracted with ethyl acetate (5.0 mL  $\times$  3). The combined organic phase was washed with  $\text{H}_2\text{O}$  and brine, dried over  $\text{Na}_2\text{SO}_4$ . The solvent was removed under reduced pressure. The residue was purified by flash chromatography (ethyl acetate/petroleum ether = 1/10 to 1/3) to afford the desired products.

#### Ethyl (*R*)-1,3-dimethyl-2-oxoindoline-3-carboxylate (2a)

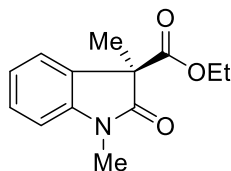

30.8 mg, 66% yield, white solid.  $^1\text{H}$  NMR (400 MHz,  $\text{CDCl}_3$ )  $\delta$  7.28-7.32 (m, 1H), 7.23-7.25 (m, 1H), 7.03-7.07 (m, 1H), 6.85 (d,  $J = 8.0$  Hz, 1H), 4.09-4.13 (m, 2H), 3.24 (s, 3H), 1.64 (s, 3H), 1.14 (t,  $J = 6.8$  Hz, 3H);  $^{13}\text{C}$  NMR (100 MHz,  $\text{CDCl}_3$ )  $\delta$  175.3, 169.8, 143.6, 130.2, 129.0, 123.0, 122.9, 108.4, 61.9, 55.1, 26.5, 20.2, 13.9; ESI-MS  $m/z$  256.1 ( $\text{M} + \text{Na}$ ) $^+$ , HRMS calcd for  $\text{C}_{13}\text{H}_{15}\text{NNaO}_3^+$  ( $\text{M} + \text{Na}$ ) $^+$  256.0944, found 256.0944; HPLC Chiralcel OJ-H (hexane/*i*-PrOH = 99:1, 1.0 ml/min)  $\tau_{\text{major}} = 21.5$  min,  $\tau_{\text{minor}} = 29.7$  min;  $[\alpha]_{\text{D}}^{25} -61.8$  ( $c$  1.0,  $\text{CHCl}_3$ , 90% *ee*).

#### Methyl (*R*)-1,3-dimethyl-2-oxoindoline-3-carboxylate (2b)

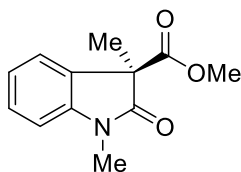

19.8 mg, 45% yield, white solid.  $^1\text{H}$  NMR (400 MHz,  $\text{CDCl}_3$ )  $\delta$  7.30-7.36 (m, 1H), 7.24-7.26 (m,

1H), 7.07 (t,  $J = 7.6$  Hz, 1H), 6.87 (d,  $J = 8.0$  Hz, 1H), 3.65 (s, 3H), 3.25 (s, 3H), 1.67 (s, 3H);  $^{13}\text{C}$  NMR (100 MHz,  $\text{CDCl}_3$ )  $\delta$  175.1, 170.3, 143.6, 130.1, 129.0, 123.1, 122.9, 108.4, 54.9, 53.0, 26.6, 20.2; ESI-MS  $m/z$  242.1 ( $\text{M} + \text{Na}^+$ ), HRMS calcd for  $\text{C}_{12}\text{H}_{13}\text{NNaO}_3^+$  ( $\text{M} + \text{Na}^+$ ) 242.0788, found 242.0788; HPLC Chiralcel AD-H (hexane/*i*-PrOH = 99:1, 1.0 ml/min)  $\tau_{\text{major}} = 25.8$  min,  $\tau_{\text{minor}} = 30.1$  min;  $[\alpha]_{\text{D}}^{25} -27.7$  ( $c$  1.0,  $\text{CHCl}_3$ , 89% *ee*).

**Isopropyl (*R*)-1,3-dimethyl-2-oxoindoline-3-carboxylate (2c)**

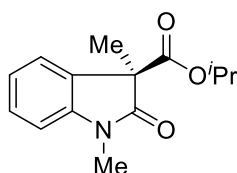

33.6 mg, 68% yield, white solid.  $^1\text{H}$  NMR (400 MHz,  $\text{CDCl}_3$ )  $\delta$  7.28-7.32 (m, 1H), 7.23-7.25 (m, 1H), 7.03-7.07 (m, 1H), 6.85 (d,  $J = 8.0$  Hz, 1H), 4.94-5.00 (m, 1H), 3.24 (s, 3H), 1.64 (s, 3H), 1.18 (d,  $J = 6.0$  Hz, 3H), 1.08 (d,  $J = 6.0$  Hz, 3H);  $^{13}\text{C}$  NMR (100 MHz,  $\text{CDCl}_3$ )  $\delta$  175.3, 169.2, 143.7, 130.4, 128.9, 122.9, 122.8, 108.4, 69.4, 55.3, 26.5, 21.4, 21.3, 20.2; ESI-MS  $m/z$  270.1 ( $\text{M} + \text{Na}^+$ ), HRMS calcd for  $\text{C}_{14}\text{H}_{17}\text{NNaO}_3^+$  ( $\text{M} + \text{Na}^+$ ) 270.1101, found 270.1100; HPLC Chiralpak AS-H (hexane/*i*-PrOH = 99:1, 1.0 ml/min)  $\tau_{\text{major}} = 13.6$  min,  $\tau_{\text{minor}} = 12.5$  min;  $[\alpha]_{\text{D}}^{25} -50.2$  ( $c$  1.0,  $\text{CHCl}_3$ , 94% *ee*).

***tert*-Butyl (*R*)-1,3-dimethyl-2-oxoindoline-3-carboxylate (2d)**

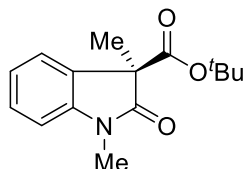

45.4 mg, 87% yield, white solid.  $^1\text{H}$  NMR (400 MHz,  $\text{CDCl}_3$ )  $\delta$  7.28-7.32 (m, 1H), 7.22-7.25 (m, 1H), 7.05 (t,  $J = 7.6$  Hz, 1H), 6.84 (d,  $J = 8.0$  Hz, 1H), 3.23 (s, 3H), 1.64 (s, 3H), 1.60 (s, 3H), 1.33 (s, 9H);  $^{13}\text{C}$  NMR (100 MHz,  $\text{CDCl}_3$ )  $\delta$  175.5, 168.7, 143.7, 130.7, 128.7, 122.7, 108.3, 82.2, 56.0, 27.7, 26.6, 19.7; ESI-MS  $m/z$  284.1 ( $\text{M} + \text{Na}^+$ ), HRMS calcd for  $\text{C}_{15}\text{H}_{19}\text{NNaO}_3^+$  ( $\text{M} + \text{Na}^+$ ) 284.1257, found 284.1256; HPLC Chiralcel OJ-H (hexane/*i*-PrOH = 99:1, 1.0 ml/min)  $\tau_{\text{major}} = 11.7$  min,  $\tau_{\text{minor}} = 9.7$  min;  $[\alpha]_{\text{D}}^{25} -104.9$  ( $c$  1.0,  $\text{CHCl}_3$ , 95% *ee*).

***tert*-Butyl (*R*)-1-allyl-3-methyl-2-oxoindoline-3-carboxylate (2e)**

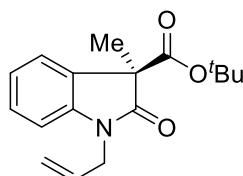

54.0 mg, 94% yield, white solid.  $^1\text{H}$  NMR (400 MHz,  $\text{CDCl}_3$ )  $\delta$  7.21-7.27 (m, 2H), 7.00-7.05 (m, 1H), 6.81 (d,  $J = 8.0$  Hz, 1H), 5.78-5.87 (m, 1H), 5.17-5.24 (m, 2H), 4.48-4.53 (m, 1H), 4.14-4.20 (m, 1H), 1.61 (s, 3H), 1.32 (s, 9H);  $^{13}\text{C}$  NMR (100 MHz,  $\text{CDCl}_3$ )  $\delta$  175.3, 168.7, 142.8, 131.0, 130.7, 128.6, 122.7, 122.6, 117.2, 109.2, 82.3, 55.9, 42.2, 27.7, 19.6; ESI-MS  $m/z$  310.1 ( $\text{M} + \text{Na}^+$ ), HRMS



calcd for  $C_{17}H_{21}NNaO_3^+$  ( $M + Na$ )<sup>+</sup> 310.1414, found 310.1414; HPLC Chiralcel OD-H (hexane/*i*-PrOH = 99:1, 1.0 ml/min)  $\tau_{major}$  = 8.0 min,  $\tau_{minor}$  = 10.7 min;  $[\alpha]_D^{25}$  -36.8 (*c* 1.0,  $CHCl_3$ , 95% *ee*).

***tert*-Butyl (*R*)-1-benzyl-3-methyl-2-oxindoline-3-carboxylate (2f)**

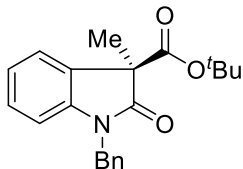

64.7 mg, 96% yield, white solid.  $^1H$  NMR (400 MHz,  $CDCl_3$ )  $\delta$  7.22-7.35 (m, 6H), 7.16-7.18 (m, 1H), 6.99-7.02 (m, 1H), 6.69 (d, *J* = 8.0 Hz, 1H), 5.22 (d, *J* = 16.0 Hz, 1H), 4.67 (d, *J* = 16.0 Hz), 1.67 (s, 3H), 1.36 (s, 9H);  $^{13}C$  NMR (100 MHz,  $CDCl_3$ )  $\delta$  175.7, 168.7, 142.7, 135.7, 130.7, 128.7, 127.6, 127.1, 122.8, 122.6, 109.4, 82.4, 55.9, 43.7, 27.8, 19.9; ESI-MS *m/z* 360.1 ( $M + Na^+$ ), HRMS calcd for  $C_{21}H_{23}NNaO_3^+$  ( $M + Na$ )<sup>+</sup> 360.1570, found 360.1571; HPLC Chiralcel OD-H (hexane/*i*-PrOH = 99:1, 1.0 ml/min)  $\tau_{major}$  = 13.1 min,  $\tau_{minor}$  = 17.6 min;  $[\alpha]_D^{25}$  -32.5 (*c* 1.0,  $CHCl_3$ , 94% *ee*).

***tert*-Butyl (*R*)-5-methoxy-1,3-dimethyl-2-oxindoline-3-carboxylate (2g)**

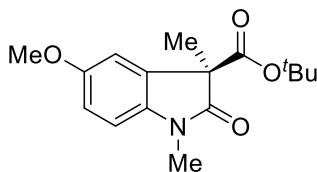

54.1 mg, 93% yield, white solid.  $^1H$  NMR (400 MHz,  $CDCl_3$ )  $\delta$  6.85 (d, *J* = 2.4 Hz, 1H), 6.81 (dd, *J* = 8.4 Hz, 2.4 Hz, 1H), 6.73 (d, *J* = 8.4 Hz, 1H), 3.77 (s, 3H), 3.19 (s, 3H), 1.58 (s, 3H), 1.34 (s, 9H);  $^{13}C$  NMR (100 MHz,  $CDCl_3$ )  $\delta$  175.5, 168.7, 143.7, 130.7, 128.7, 122.7, 108.3, 82.2, 56.0, 27.7, 26.6, 19.7; ESI-MS *m/z* 314.1 ( $M + Na^+$ ), HRMS calcd for  $C_{16}H_{21}NNaO_4^+$  ( $M + Na$ )<sup>+</sup> 314.1363, found 314.1363; HPLC Chiralcel OJ-H (hexane/*i*-PrOH = 99:1, 1.0 ml/min)  $\tau_{major}$  = 27.5 min,  $\tau_{minor}$  = 19.1 min;  $[\alpha]_D^{25}$  -61.5 (*c* 1.0,  $CHCl_3$ , 97% *ee*).

***tert*-Butyl (*R*)-1,3,5-trimethyl-2-oxindoline-3-carboxylate (2h)**

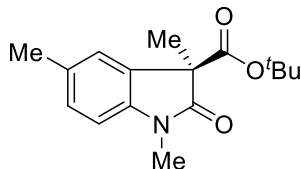

52.8 mg, 96% yield, white solid.  $^1H$  NMR (400 MHz,  $CDCl_3$ )  $\delta$  7.08 (d, *J* = 8.0 Hz, 1H), 7.04 (s, 1H), 6.72 (d, *J* = 8.0 Hz, 1H), 3.20 (s, 3H), 2.32 (s, 3H), 1.58 (s, 3H), 1.34 (s, 9H);  $^{13}C$  NMR (100 MHz,  $CDCl_3$ )  $\delta$  175.5, 168.8, 141.3, 132.3, 130.7, 128.9, 123.5, 107.9, 82.1, 56.0, 27.7, 26.4, 21.1, 19.7; ESI-MS *m/z* 298.1 ( $M + Na^+$ ), HRMS calcd for  $C_{16}H_{21}NNaO_3^+$  ( $M + Na$ )<sup>+</sup> 298.1414, found 298.1413; HPLC Chiralcel OJ-H (hexane/*i*-PrOH = 99:1, 1.0 ml/min)  $\tau_{major}$  = 9.6 min,  $\tau_{minor}$  = 8.4 min;  $[\alpha]_D^{25}$  -24.8 (*c* 1.0,  $CHCl_3$ , 96% *ee*).

***tert*-Butyl (*R*)-5-(*tert*-butyl)-1,3-dimethyl-2-oxindoline-3-carboxylate (2i)**

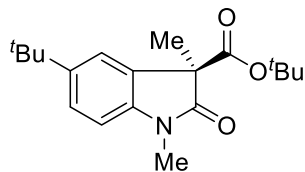

60.2 mg, 95% yield, white solid.  $^1\text{H NMR}$  (400 MHz,  $\text{CDCl}_3$ )  $\delta$  7.28-7.32 (m, 2H), 6.76 (d,  $J = 8.0$  Hz, 1H), 3.21 (s, 3H), 1.61 (s, 3H), 1.33 (s, 9H), 1.29 (s, 9H);  $^{13}\text{C NMR}$  (100 MHz,  $\text{CDCl}_3$ )  $\delta$  175.6, 168.9, 146.0, 141.3, 130.4, 125.1, 120.0, 107.6, 82.0, 56.2, 34.6, 31.5, 27.7, 26.4, 19.7; ESI-MS  $m/z$  340.1 ( $\text{M} + \text{Na}^+$ ), HRMS calcd for  $\text{C}_{19}\text{H}_{27}\text{NNaO}_3^+$  ( $\text{M} + \text{Na}^+$ ) 340.1883, found 340.1885; HPLC Chiralcel IC-H (hexane/*i*-PrOH = 95:5, 1.0 ml/min)  $\tau_{\text{major}} = 16.2$  min,  $\tau_{\text{minor}} = 15.7$  min;  $[\alpha]_{\text{D}}^{25} -46.2$  ( $c$  1.0,  $\text{CHCl}_3$ , 97% *ee*).

***tert*-Butyl (*R*)-5-bromo-1,3-dimethyl-2-oxindoline-3-carboxylate (2j)**

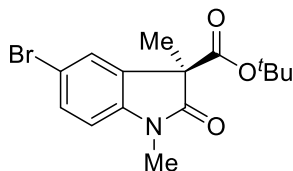

63.0 mg, 93% yield, white solid.  $^1\text{H NMR}$  (400 MHz,  $\text{CDCl}_3$ )  $\delta$  7.43 (dd,  $J = 8.0$  Hz, 2.0 Hz, 1H), 7.35 (d,  $J = 2.0$  Hz, 1H), 6.72 (d,  $J = 8.0$  Hz, 1H), 3.21 (s, 3H), 1.59 (s, 3H), 1.36 (s, 9H);  $^{13}\text{C NMR}$  (100 MHz,  $\text{CDCl}_3$ )  $\delta$  174.9, 167.8, 142.8, 132.5, 131.6, 126.1, 115.2, 109.7, 82.7, 56.0, 27.7, 26.5, 19.8; ESI-MS  $m/z$  362.0 ( $\text{M} + \text{Na}^+$ ), HRMS calcd for  $\text{C}_{15}\text{H}_{18}\text{BrNNaO}_3^+$  ( $\text{M} + \text{Na}^+$ ) 362.0362, found 362.0361; HPLC Chiralcel OD-H (hexane/*i*-PrOH = 99:1, 1.0 ml/min)  $\tau_{\text{major}} = 13.7$  min,  $\tau_{\text{minor}} = 11.7$  min;  $[\alpha]_{\text{D}}^{25} -16.2$  ( $c$  1.0,  $\text{CHCl}_3$ , 94% *ee*).

***tert*-Butyl (*R*)-5-cyano-1,3-dimethyl-2-oxindoline-3-carboxylate (2k)**

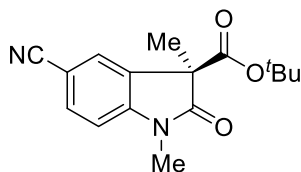

48.6 mg, 85% yield, white solid.  $^1\text{H NMR}$  (400 MHz,  $\text{CDCl}_3$ )  $\delta$  7.64 (dd,  $J = 8.0$  Hz, 1.6 Hz, 1H), 7.48 (d,  $J = 1.6$  Hz, 1H), 6.92 (d,  $J = 8.0$  Hz, 1H), 3.25 (s, 3H), 1.61 (s, 3H), 1.35 (s, 9H);  $^{13}\text{C NMR}$  (100 MHz,  $\text{CDCl}_3$ )  $\delta$  175.0, 167.3, 147.5, 134.1, 131.6, 126.2, 118.9, 108.7, 105.9, 83.2, 55.6, 27.7, 26.7, 19.7; ESI-MS  $m/z$  309.1 ( $\text{M} + \text{Na}^+$ ), HRMS calcd for  $\text{C}_{16}\text{H}_{18}\text{N}_2\text{NaO}_3^+$  ( $\text{M} + \text{Na}^+$ ) 309.1210, found 309.1209; HPLC Chiralcel OJ-H (hexane/*i*-PrOH = 70:30, 1.0 ml/min)  $\tau_{\text{major}} = 12.6$  min,  $\tau_{\text{minor}} = 7.6$  min;  $[\alpha]_{\text{D}}^{25} -30.3$  ( $c$  1.0,  $\text{CHCl}_3$ , 93% *ee*).

***tert*-Butyl (*R*)-1,3-dimethyl-2-oxo-5-(trifluoromethyl)indoline-3-carboxylate (2l)**

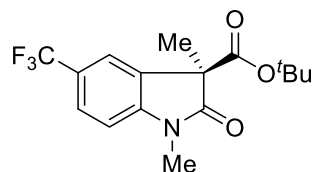

61.9 mg, 94% yield, white solid.  $^1\text{H NMR}$  (400 MHz,  $\text{CDCl}_3$ )  $\delta$  7.60 (dd,  $J = 8.0$  Hz, 1.2 Hz, 1H), 7.48 (d,  $J = 1.2$  Hz, 1H), 6.92 (d,  $J = 8.0$  Hz, 1H), 3.26 (s, 3H), 1.64 (s, 3H), 1.35 (s, 9H);  $^{13}\text{C NMR}$  (100 MHz,  $\text{CDCl}_3$ )  $\delta$  175.3, 167.7, 146.7, 131.2, 126.5 (q,  $J = 4.0$  Hz), 125.0 (q,  $J = 32.7$  Hz), 124.3 (q,  $J = 270.0$  Hz), 119.9 (q,  $J = 3.7$  Hz), 108.0, 82.9, 55.9, 27.6, 26.6, 19.7; ESI-MS  $m/z$  352.1 ( $\text{M} + \text{Na}^+$ ), HRMS calcd for  $\text{C}_{16}\text{H}_{18}\text{F}_3\text{NNaO}_3^+$  ( $\text{M} + \text{Na}$ ) $^+$  352.1131, found 352.1131; HPLC Chiralpak AD-H (hexane/*i*-PrOH = 99:1, 1.0 ml/min)  $\tau_{\text{major}} = 8.4$  min,  $\tau_{\text{minor}} = 7.0$  min;  $[\alpha]_{\text{D}}^{25} -21.3$  ( $c$  1.0,  $\text{CHCl}_3$ , 94% *ee*).

***tert*-Butyl (R)-1,3-dimethyl-5-nitro-2-oxindoline-3-carboxylate (2m)**

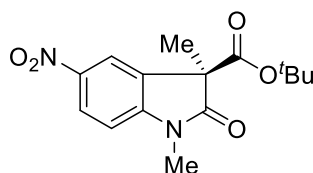

49.0 mg, 80% yield, white solid.  $^1\text{H NMR}$  (400 MHz,  $\text{CDCl}_3$ )  $\delta$  8.30 (dd,  $J = 8.8$  Hz, 2.4 Hz, 1H), 8.14 (d,  $J = 2.4$  Hz, 1H), 6.94 (d,  $J = 8.8$  Hz, 1H), 3.30 (s, 3H), 1.66 (s, 3H), 1.37 (s, 9H);  $^{13}\text{C NMR}$  (100 MHz,  $\text{CDCl}_3$ )  $\delta$  175.3, 167.1, 149.3, 143.6, 131.3, 126.1, 118.9, 107.8, 83.4, 55.8, 27.7, 26.9, 19.7; ESI-MS  $m/z$  329.1 ( $\text{M} + \text{Na}^+$ ), HRMS calcd for  $\text{C}_{15}\text{H}_{18}\text{N}_2\text{NaO}_5^+$  ( $\text{M} + \text{Na}$ ) $^+$  329.1108, found 329.1108; HPLC Chiralcel OD-H (hexane/*i*-PrOH = 95:5, 1.0 ml/min)  $\tau_{\text{major}} = 13.6$  min,  $\tau_{\text{minor}} = 12.8$  min;  $[\alpha]_{\text{D}}^{25} -7.5$  ( $c$  1.0,  $\text{CHCl}_3$ , 89% *ee*).

***tert*-Butyl (R)-1,3,6-trimethyl-2-oxindoline-3-carboxylate (2n)**

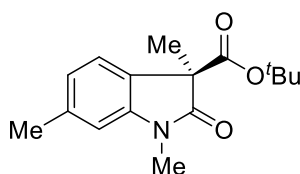

47.9 mg, 87% yield, white solid.  $^1\text{H NMR}$  (400 MHz,  $\text{CDCl}_3$ )  $\delta$  7.10 (d,  $J = 7.6$  Hz, 1H), 6.84 (dd,  $J = 7.6$  Hz, 0.8 Hz, 1H), 6.66 (d,  $J = 0.8$  Hz, 1H), 3.20 (s, 3H), 2.37 (s, 3H), 1.57 (s, 3H), 1.33 (s, 9H);  $^{13}\text{C NMR}$  (100 MHz,  $\text{CDCl}_3$ )  $\delta$  175.8, 168.9, 143.7, 138.9, 127.8, 123.2, 122.4, 109.2, 82.0, 55.8, 27.7, 26.4, 21.9, 19.7; ESI-MS  $m/z$  298.1 ( $\text{M} + \text{Na}^+$ ), HRMS calcd for  $\text{C}_{16}\text{H}_{21}\text{NNaO}_3^+$  ( $\text{M} + \text{Na}$ ) $^+$  298.1414, found 298.1415; HPLC Chiralcel OD-H (hexane/*i*-PrOH = 99:1, 1.0 ml/min)  $\tau_{\text{major}} = 10.1$  min,  $\tau_{\text{minor}} = 11.5$  min;  $[\alpha]_{\text{D}}^{25} -70.7$  ( $c$  1.0,  $\text{CHCl}_3$ , 94% *ee*).

***tert*-Butyl (R)-6-chloro-1,3-dimethyl-2-oxindoline-3-carboxylate (2o)**

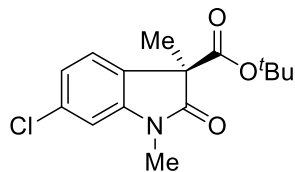

51.3 mg, 87% yield, white solid.  $^1\text{H NMR}$  (400 MHz,  $\text{CDCl}_3$ )  $\delta$  7.14 (d,  $J = 8.0$  Hz, 1H), 7.02 (dd,  $J = 8.0$  Hz, 1.6 Hz, 1H), 6.84 (d,  $J = 1.6$  Hz, 1H), 3.21 (s, 3H), 1.58 (s, 3H), 1.34 (s, 9H);  $^{13}\text{C NMR}$  (100 MHz,  $\text{CDCl}_3$ )  $\delta$  175.4, 168.1, 144.9, 134.6, 129.0, 123.7, 122.5, 109.0, 82.5, 55.6, 27.7, 26.5, 19.6; ESI-MS  $m/z$  318.1 ( $\text{M} + \text{Na}^+$ ), HRMS calcd for  $\text{C}_{15}\text{H}_{18}\text{ClNNaO}_3^+$  ( $\text{M} + \text{Na}^+$ ) $^+$  318.0867, found 318.0867; HPLC Chiralcel OD-H (hexane/*i*-PrOH = 99:1, 1.0 ml/min)  $\tau_{\text{major}} = 10.6$  min,  $\tau_{\text{minor}} = 12.3$  min;  $[\alpha]_{\text{D}}^{25} -62.4$  (*c* 1.0,  $\text{CHCl}_3$ , 94% *ee*).

***tert*-Butyl (R)-6-fluoro-1,3-dimethyl-2-oxoindoline-3-carboxylate (2p)**

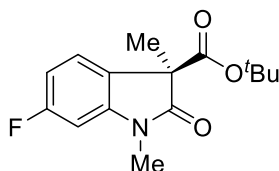

54.1 mg, 97% yield, white solid.  $^1\text{H NMR}$  (400 MHz,  $\text{CDCl}_3$ )  $\delta$  7.12-7.16 (m, 1H), 6.69-6.72 (m, 1H), 6.57 (dd,  $J = 8.8$  Hz, 2.4 Hz, 1H), 3.19 (s, 3H), 1.56 (s, 3H), 1.32 (s, 9H);  $^{13}\text{C NMR}$  (100 MHz,  $\text{CDCl}_3$ )  $\delta$  175.7, 168.4, 163.4 (d,  $J = 234.0$  Hz), 145.2 (d,  $J = 11.0$  Hz), 125.9 (d,  $J = 3.0$  Hz), 123.8 (d,  $J = 10.0$  Hz), 108.7 (d,  $J = 23.0$  Hz), 97.2 (d,  $J = 28.0$  Hz), 82.4, 55.5, 27.7, 26.5, 19.7; ESI-MS  $m/z$  302.1 ( $\text{M} + \text{Na}^+$ ), HRMS calcd for  $\text{C}_{15}\text{H}_{18}\text{FNNaO}_3^+$  ( $\text{M} + \text{Na}^+$ ) $^+$  302.1163, found 302.1160; HPLC Chiralcel OD-H (hexane/*i*-PrOH = 99:1, 1.0 ml/min)  $\tau_{\text{major}} = 10.2$  min,  $\tau_{\text{minor}} = 11.7$  min;  $[\alpha]_{\text{D}}^{25} -61.2$  (*c* 1.0,  $\text{CHCl}_3$ , 93% *ee*).

**3-(*tert*-Butyl) 6-methyl (R)-1,3-dimethyl-2-oxoindoline-3,6-dicarboxylate (2q)**

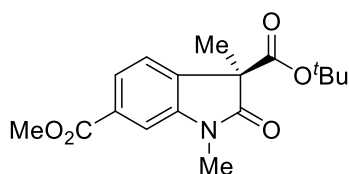

60.0 mg, 94% yield, white solid.  $^1\text{H NMR}$  (400 MHz,  $\text{CDCl}_3$ )  $\delta$  7.76 (dd,  $J = 7.6$  Hz, 1.2 Hz, 1H), 7.47 (d,  $J = 1.2$  Hz, 1H), 7.27 (d,  $J = 7.6$  Hz, 1H), 3.91 (s, 3H), 3.25 (s, 3H), 1.59 (s, 3H), 1.30 (s, 9H);  $^{13}\text{C NMR}$  (100 MHz,  $\text{CDCl}_3$ )  $\delta$  175.1, 167.9, 166.6, 144.0, 135.6, 130.9, 124.6, 122.5, 108.9, 82.6, 56.1, 52.3, 27.6, 26.6, 19.5; ESI-MS  $m/z$  342.1 ( $\text{M} + \text{Na}^+$ ), HRMS calcd for  $\text{C}_{17}\text{H}_{21}\text{NNaO}_5^+$  ( $\text{M} + \text{Na}^+$ ) $^+$  342.1312, found 342.1313; HPLC Chiralpak AS-H (hexane/*i*-PrOH = 99:1, 1.0 ml/min)  $\tau_{\text{major}} = 19.3$  min,  $\tau_{\text{minor}} = 16.1$  min;  $[\alpha]_{\text{D}}^{25} -80.8$  (*c* 1.0,  $\text{CHCl}_3$ , 96% *ee*).

***tert*-Butyl (R)-1,3,4-trimethyl-2-oxoindoline-3-carboxylate (2r)**

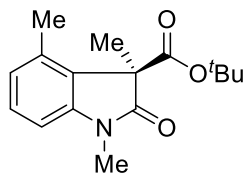

46.2 mg, 84% yield, white solid.  $^1\text{H}$  NMR (400 MHz,  $\text{CDCl}_3$ )  $\delta$  7.19 (t,  $J = 7.6$  Hz, 1H), 6.83 (d,  $J = 7.6$  Hz, 1H), 6.68 (d,  $J = 7.6$  Hz, 1H), 3.21 (s, 3H), 2.27 (s, 3H), 1.63 (s, 3H), 1.34 (s, 9H);  $^{13}\text{C}$  NMR (100 MHz,  $\text{CDCl}_3$ )  $\delta$  175.6, 168.4, 144.0, 134.1, 128.8, 128.3, 125.0, 105.9, 82.0, 56.3, 27.7, 26.6, 17.9, 17.6; ESI-MS  $m/z$  298.1 ( $\text{M} + \text{Na}^+$ ), HRMS calcd for  $\text{C}_{16}\text{H}_{21}\text{NNaO}_3^+$  ( $\text{M} + \text{Na}^+$ ) $^+$  298.1414, found 298.1414; HPLC Chiralcel IC-H (hexane/*i*-PrOH = 99:1, 1.0 ml/min)  $\tau_{\text{major}} = 47.4$  min,  $\tau_{\text{minor}} = 45.9$  min;  $[\alpha]_{\text{D}}^{25} -20.3$  ( $c$  1.0,  $\text{CHCl}_3$ , 94% *ee*).

***tert*-Butyl (R)-4-iodo-1,3-dimethyl-2-oxoindoline-3-carboxylate (2s)**

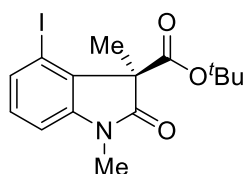

55.7 mg, 72% yield, white solid.  $^1\text{H}$  NMR (400 MHz,  $\text{CDCl}_3$ )  $\delta$  7.42 (d,  $J = 8.0$  Hz, 1H), 7.00 (t,  $J = 8.0$  Hz, 1H), 6.81 (d,  $J = 8.0$  Hz, 1H), 3.21 (s, 3H), 1.70 (s, 3H), 1.38 (s, 9H);  $^{13}\text{C}$  NMR (100 MHz,  $\text{CDCl}_3$ )  $\delta$  174.5, 166.5, 145.2, 133.9, 133.0, 129.9, 108.0, 90.5, 82.5, 59.0, 27.8, 26.7, 17.6; ESI-MS  $m/z$  410.0 ( $\text{M} + \text{Na}^+$ ), HRMS calcd for  $\text{C}_{15}\text{H}_{18}\text{INNaO}_3^+$  ( $\text{M} + \text{Na}^+$ ) $^+$  410.0224, found 410.0224; HPLC Chiralcel OJ-H (hexane/*i*-PrOH = 99:1, 1.0 ml/min)  $\tau_{\text{major}} = 11.1$  min,  $\tau_{\text{minor}} = 15.8$  min;  $[\alpha]_{\text{D}}^{25} +56.5$  ( $c$  1.0,  $\text{CHCl}_3$ , 98% *ee*).

***tert*-Butyl (R)-1,3,7-trimethyl-2-oxoindoline-3-carboxylate (2t)**

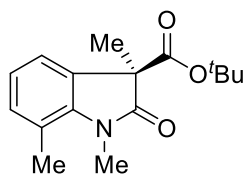

50.1 mg, 91% yield, white solid.  $^1\text{H}$  NMR (400 MHz,  $\text{CDCl}_3$ )  $\delta$  7.06 (d,  $J = 7.6$  Hz, 1H), 7.02 (d,  $J = 7.6$  Hz, 1H), 6.71 (t,  $J = 7.6$  Hz, 1H), 3.50 (s, 3H), 2.58 (s, 3H), 1.57 (s, 3H), 1.35 (s, 9H);  $^{13}\text{C}$  NMR (100 MHz,  $\text{CDCl}_3$ )  $\delta$  176.3, 168.8, 141.4, 132.5, 131.2, 122.6, 120.6, 119.8, 82.1, 55.5, 29.8, 27.7, 20.1, 19.0; ESI-MS  $m/z$  298.1 ( $\text{M} + \text{Na}^+$ ), HRMS calcd for  $\text{C}_{16}\text{H}_{21}\text{NNaO}_3^+$  ( $\text{M} + \text{Na}^+$ ) $^+$  298.1414, found 298.1412; HPLC Chiralcel OJ-H (hexane/*i*-PrOH = 99:1, 1.0 ml/min)  $\tau_{\text{major}} = 11.2$  min,  $\tau_{\text{minor}} = 9.4$  min;  $[\alpha]_{\text{D}}^{25} -84.9$  ( $c$  1.0,  $\text{CHCl}_3$ , 95% *ee*).

***tert*-Butyl (R)-1-methyl-2-oxo-3-propylindoline-3-carboxylate (2u)**

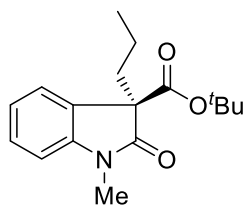

55.5 mg, 96% yield, white solid.  $^1\text{H NMR}$  (400 MHz,  $\text{CDCl}_3$ )  $\delta$  7.25-7.28 (m, 1H), 7.22 (dd,  $J = 7.6$  Hz, 0.8 Hz, 1H), 7.01-7.05 (m, 1H), 6.81 (d,  $J = 7.6$  Hz, 1H), 3.20 (s, 3H), 2.04-2.22 (m, 2H), 1.33 (s, 9H), 0.99-1.05 (m, 1H), 0.90-0.93 (m, 1H), 0.79 (t,  $J = 6.8$  Hz, 3H);  $^{13}\text{C NMR}$  (100 MHz,  $\text{CDCl}_3$ )  $\delta$  174.6, 168.4, 144.2, 128.8, 128.6, 123.1, 122.6, 108.1, 82.1, 60.6, 36.0, 27.7, 26.3, 17.1, 14.1; ESI-MS  $m/z$  312.1 ( $\text{M} + \text{Na}^+$ ), HRMS calcd for  $\text{C}_{17}\text{H}_{23}\text{NNaO}_3^+$  ( $\text{M} + \text{Na}$ ) $^+$  312.1570, found 312.1569; HPLC Chiralcel OD-H (hexane/*i*-PrOH = 99:1, 1.0 ml/min)  $\tau_{\text{major}} = 7.7$  min,  $\tau_{\text{minor}} = 11.0$  min;  $[\alpha]_{\text{D}}^{25} -31.2$  ( $c$  1.0,  $\text{CHCl}_3$ , 96% *ee*).

***tert*-Butyl (*R*)-3-hexyl-1-methyl-2-oxoindoline-3-carboxylate (2v)**

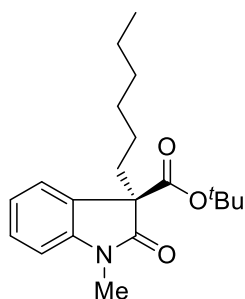

64.2 mg, 97% yield, white solid.  $^1\text{H NMR}$  (400 MHz,  $\text{CDCl}_3$ )  $\delta$  7.27-7.31 (m, 1H), 7.23 (d,  $J = 7.6$  Hz, 1H), 7.05 (t,  $J = 7.6$  Hz, 1H), 6.83 (d,  $J = 8.4$  Hz, 1H), 3.22 (s, 3H), 2.07-2.55 (m, 2H), 1.35 (s, 9H), 1.13-1.23 (m, 6H), 0.98-1.02 (m, 1H), 0.86-0.89 (m, 1H), 0.80 (t,  $J = 6.8$  Hz, 3H);  $^{13}\text{C NMR}$  (100 MHz,  $\text{CDCl}_3$ )  $\delta$  174.6, 168.5, 144.2, 128.8, 128.6, 123.1, 122.6, 108.1, 82.1, 60.5, 33.9, 31.5, 29.3, 27.7, 26.3, 23.6, 22.5, 14.0; ESI-MS  $m/z$  354.0 ( $\text{M} + \text{Na}^+$ ), HRMS calcd for  $\text{C}_{20}\text{H}_{29}\text{NNaO}_3^+$  ( $\text{M} + \text{Na}$ ) $^+$  354.2040, found 354.2040; HPLC Chiralcel OD-H (hexane/*i*-PrOH = 99:1, 1.0 ml/min)  $\tau_{\text{major}} = 6.5$  min,  $\tau_{\text{minor}} = 10.3$  min;  $[\alpha]_{\text{D}}^{25} -65.7$  ( $c$  1.0,  $\text{CHCl}_3$ , 97% *ee*).

***tert*-Butyl (*R*)-1-methyl-2-oxo-3-phenylindoline-3-carboxylate (2w)**

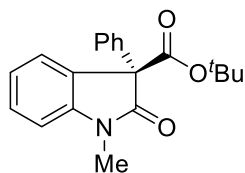

53.6 mg, 83% yield, white solid.  $^1\text{H NMR}$  (400 MHz,  $\text{CDCl}_3$ )  $\delta$  7.45 (d,  $J = 7.6$  Hz, 1H), 7.37-7.42 (m, 1H), 7.28-7.36 (m, 5H), 7.15 (t,  $J = 7.6$  Hz, 1H), 6.91 (d,  $J = 8.0$  Hz, 1H), 3.20 (s, 3H), 1.39 (s, 9H);  $^{13}\text{C NMR}$  (100 MHz,  $\text{CDCl}_3$ )  $\delta$  173.0, 168.0, 144.5, 136.2, 129.4, 128.4, 127.9, 127.8, 127.4, 125.8, 122.7, 108.5, 82.8, 64.9, 27.7, 26.6; ESI-MS  $m/z$  346.1 ( $\text{M} + \text{Na}^+$ ), HRMS calcd for  $\text{C}_{20}\text{H}_{21}\text{NNaO}_3^+$  ( $\text{M} + \text{Na}$ ) $^+$  346.1414, found : 346.1411; HPLC Chiralcel OJ-H (hexane/*i*-PrOH = 97:3, 1.0 ml/min)  $\tau_{\text{major}} = 12.0$  min,  $\tau_{\text{minor}} = 16.3$  min;  $[\alpha]_{\text{D}}^{25} -177.9$  ( $c$  1.0,  $\text{CHCl}_3$ , 87% *ee*).

***tert*-Butyl (*R*)-3-allyl-1-methyl-2-oxoindoline-3-carboxylate (2x)**

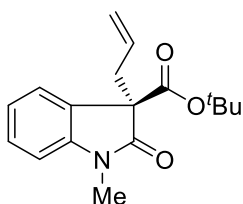

56.3 mg, 98% yield, white solid.  $^1\text{H NMR}$  (400 MHz,  $\text{CDCl}_3$ )  $\delta$  7.23-7.31 (m, 2H), 7.03-7.07 (m, 1H), 6.81 (d,  $J = 7.6$  Hz, 1H), 5.33-5.43 (m, 1H), 4.99-5.04 (m, 1H), 4.88-4.91 (m, 1H), 3.20 (s, 3H), 2.90-2.92 (m, 2H), 1.35 (s, 9H);  $^{13}\text{C NMR}$  (100 MHz,  $\text{CDCl}_3$ )  $\delta$  174.0, 167.9, 144.2, 131.4, 128.8, 128.1, 123.4, 122.6, 119.4, 108.1, 82.4, 60.1, 38.2, 27.7, 26.3; ESI-MS  $m/z$  310.1 ( $\text{M} + \text{Na}^+$ ), HRMS calcd for  $\text{C}_{17}\text{H}_{21}\text{NNaO}_3^+$  ( $\text{M} + \text{Na}$ ) $^+$  310.1414, found 310.1413; HPLC Chiralcel OD-H (hexane/*i*-PrOH = 99:1, 1.0 ml/min)  $\tau_{\text{major}} = 8.8$  min,  $\tau_{\text{minor}} = 12.6$  min;  $[\alpha]_{\text{D}}^{25} -82.2$  ( $c$  1.0,  $\text{CHCl}_3$ , 97% *ee*).

***tert*-Butyl (*R*)-3-benzyl-1-methyl-2-oxoindoline-3-carboxylate (2y)**

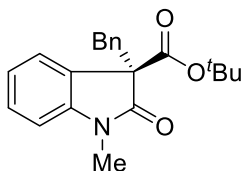

60.7 mg, 90% yield, white solid.  $^1\text{H NMR}$  (400 MHz,  $\text{CDCl}_3$ )  $\delta$  7.31 (dd,  $J = 7.2$  Hz, 0.8 Hz, 1H), 7.18-7.21 (m, 1H), 6.97-7.07 (m, 4H), 6.83-6.86 (m, 2H), 6.56 (d,  $J = 8.0$  Hz, 1H), 3.52 (d,  $J = 13.2$  Hz, 1H), 3.47 (d,  $J = 13.2$  Hz, 1H), 2.94 (s, 3H), 1.39 (s, 9H);  $^{13}\text{C NMR}$  (100 MHz,  $\text{CDCl}_3$ )  $\delta$  173.8, 168.2, 144.1, 134.8, 129.9, 128.8, 127.9, 127.5, 126.6, 123.6, 122.3, 108.0, 82.5, 61.8, 39.7, 27.8, 26.0; ESI-MS  $m/z$  360.1 ( $\text{M} + \text{Na}^+$ ), HRMS calcd for  $\text{C}_{21}\text{H}_{23}\text{NNaO}_3^+$  ( $\text{M} + \text{Na}$ ) $^+$  360.1570, found 360.1569; HPLC Chiralpak AS-H (hexane/*i*-PrOH = 99:1, 1.0 ml/min)  $\tau_{\text{major}} = 10.4$  min,  $\tau_{\text{minor}} = 8.4$  min;  $[\alpha]_{\text{D}}^{25} -54.2$  ( $c$  1.0,  $\text{CHCl}_3$ , 95% *ee*).

**IV Synthetic Transformations:**

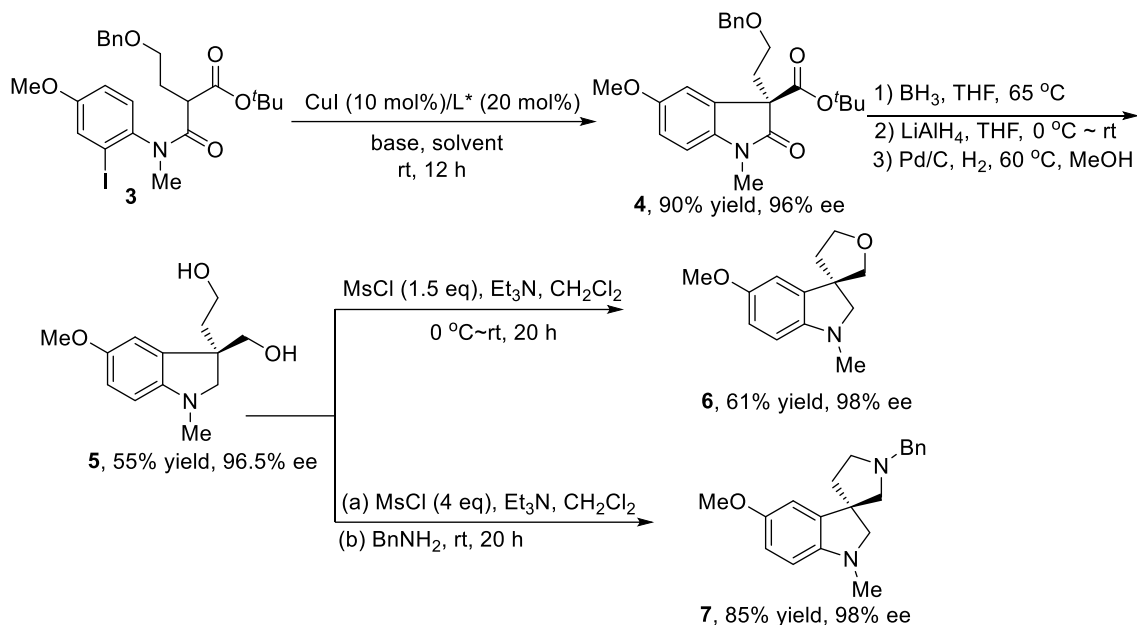

The reaction of compound **3** (4 mmol, 2.16 g) was conducted according to standard procedure, affording compound **4** as a white solid (1.48 g, 90% yield):  $^1\text{H NMR}$  (400 MHz,  $\text{CDCl}_3$ )  $\delta$  7.18-7.26 (m, 3H), 7.10-7.12 (m, 2H), 6.80-6.85 (m, 2H), 6.68 (d,  $J = 8.4$  Hz, 1H), 4.28 (d,  $J = 11.6$  Hz, 1H), 4.16 (d,  $J = 11.6$  Hz, 1H), 3.76 (s, 3H), 3.27-3.37 (m, 2H), 3.03 (s, 3H), 2.66-2.71 (m, 1H), 2.41-2.46 (m, 1H), 1.33 (s, 9H);  $^{13}\text{C NMR}$  (100 MHz,  $\text{CDCl}_3$ )  $\delta$  174.2, 168.1, 155.8, 138.2, 138.0, 129.2, 128.2, 127.5, 127.4, 113.1, 110.7, 108.5, 82.4, 72.8, 66.2, 59.1, 55.8, 33.0, 27.7, 26.4; ESI-MS  $m/z$  434.1 ( $\text{M} + \text{Na}^+$ ), HRMS calcd for  $\text{C}_{24}\text{H}_{29}\text{NNaO}_5^+$  ( $\text{M} + \text{Na}^+$ ) 434.1938, found 434.1939; HPLC Chiralcel OD-H (hexane/*i*-PrOH = 95:5, 1.0 ml/min)  $\tau_{\text{major}} = 13.6$  min,  $\tau_{\text{minor}} = 16.2$  min;  $[\alpha]_{\text{D}}^{25} -98.2$  ( $c$  1.0,  $\text{CHCl}_3$ , 96.5% ee).

**(R)-2-(3-(hydroxymethyl)-5-methoxy-1-methylindolin-3-yl)ethan-1-ol (5)**:  $\text{BH}_3\text{-Me}_2\text{S}$  (10 mL, 2.0 M in THF) was slowly added into a solution of compound **4** (1.2g, 3.0 mmol) in anhydrous THF (10 mL) at  $0^\circ\text{C}$ , and the mixture was stirred at  $65^\circ\text{C}$  until the starting materials disappear. MeOH was added to quench the reaction. The solvent was removed under reduced pressure. The residue was dissolved in anhydrous THF (10 mL), and carefully added to the mixture of lithium aluminum hydride (4 eq) in THF (10 mL) at  $0^\circ\text{C}$ . The mixture was stirred at  $0^\circ\text{C}$  to room temperature for 3 hours before quenched with  $\text{H}_2\text{O}$ . The organic phase was removed in vacuum and the residue was extracted with ethyl acetate (10 mL \* 3). The organic phase was combined and washed with brine, dried over  $\text{Na}_2\text{SO}_4$ , and removed in vacuum.

The residue was dissolved in MeOH (5 mL). Pd/C (10%) was added and the mixture was stirred at  $60^\circ\text{C}$  for 2 hours under  $\text{H}_2$ . After filtration, the solvent was removed in vacuum and the residue was purified by flash chromatography (DCM / MeOH = 60/1) to obtain the desired product **5** as a colorless oil. (390mg, 55% yield for three steps).  $^1\text{H NMR}$  (400 MHz,  $\text{CDCl}_3$ )  $\delta$  6.67-6.70 (m, 2H), 6.46 (d,  $J = 8.0$  Hz, 1H), 4.33 (brs, 1H), 3.88 (brs, 1H), 3.72 (s, 3H), 3.61-3.65 (m, 3H), 3.42-3.48 (m, 1H), 3.22 (d,  $J = 9.2$  Hz, 1H), 3.11 (d,  $J = 9.2$  Hz, 1H), 2.77 (s, 3H), 2.00-2.07 (m, 1H), 1.75-1.81 (m, 1H), 1.33 (s, 9H);  $^{13}\text{C NMR}$  (100 MHz,  $\text{CDCl}_3$ )  $\delta$  153.8, 147.0, 135.5, 112.7, 110.5, 109.1,



67.6, 64.5, 59.3, 56.0, 49.2, 39.5, 37.3; ESI-MS  $m/z$  238.1 ( $M + H$ )<sup>+</sup>, HRMS calcd for C<sub>13</sub>H<sub>20</sub>NO<sub>3</sub><sup>+</sup> ( $M + H$ )<sup>+</sup> 238.1438, found 238.1438; HPLC Chiralpak AS-H (hexane/*i*-PrOH = 75:25, 1.0 ml/min)  $\tau_{\text{major}} = 7.0$  min,  $\tau_{\text{minor}} = 7.7$  min;  $[\alpha]_{\text{D}}^{25} -8.2$  (*c* 1.0, CHCl<sub>3</sub>, 96% *ee*).

**(R)-5'-methoxy-1'-methyl-4,5-dihydro-2H-spiro[furan-3,3'-indoline] (6):** To the solution of MsCl (69 mg, 0.6 mmol) in CH<sub>2</sub>Cl<sub>2</sub> (4 mL) was added compound **5** (95 mg, 0.4 mmol) and Et<sub>3</sub>N (81 mg, 0.8 mmol) at 0 °C. The mixture was stirred at room temperature for 20 h. After completion of the reaction as indicated by TLC analysis, the mixture was concentrated in vacuum and the residue was purified by flash column chromatography (ethyl acetate/petroleum ether = 1:5) to afford the desired product **6** as a white solid (54 mg, 61% yield). <sup>1</sup>H NMR (400 MHz, DMSO-*d*<sup>6</sup>)  $\delta$  6.74 (d, *J* = 2.8 Hz, 1H), 6.66 (dd, *J* = 8.4 Hz, 2.8 Hz, 1H), 6.47 (d, *J* = 8.4 Hz, 1H), 3.92-3.97 (m, 1H), 3.81-3.87 (m, 1H), 3.73 (d, *J* = 8.4 Hz, 1H), 3.67 (s, 3H), 3.60 (d, *J* = 8.4 Hz, 1H), 3.18 (d, *J* = 8.8 Hz, 1H), 3.10 (d, *J* = 8.8 Hz, 1H), 2.64 (s, 3H), 2.11-2.20 (m, 1H), 1.99-2.09 (m, 1H); <sup>13</sup>C NMR (100 MHz, DMSO-*d*<sup>6</sup>)  $\delta$  153.3, 147.6, 135.5, 113.0, 109.8, 108.5, 77.4, 68.1, 67.8, 56.0, 51.6, 38.9, 37.1; ESI-MS  $m/z$  220.1 ( $M + H$ )<sup>+</sup>, HRMS calcd for C<sub>13</sub>H<sub>18</sub>NO<sub>2</sub><sup>+</sup> ( $M + H$ )<sup>+</sup> 220.1332, found 220.1332; HPLC Chiralcel OD-H (hexane/*i*-PrOH = 99:1, 1.0 ml/min)  $\tau_{\text{major}} = 16.1$  min,  $\tau_{\text{minor}} = 17.9$  min;  $[\alpha]_{\text{D}}^{25} -5.3$  (*c* 1.0, CHCl<sub>3</sub>, 98% *ee*).

**(S)-1'-benzyl-5-methoxy-1-methylspiro[indoline-3,3'-pyrrolidine] (7):** To the solution of MsCl (183 mg, 1.6 mmol) in CH<sub>2</sub>Cl<sub>2</sub> (8 mL) was added compound **5** (95 mg, 0.4 mmol) and triethylamine (162 mg, 0.4 mmol) at 0 °C under Ar. The reaction mixture was stirred at room temperature for 2 h and concentrated in vacuum to give a residue. To the residue was added 2 mL benzylamine and the resulting reaction mixture was stirred at room temperature for another 12 h. After completion of the reaction as indicated by TLC analysis, the mixture was concentrated in vacuum and the residue was purified by flash column chromatography (ethyl acetate/petroleum ether = 1:5) to afford the desired product **7** (105 mg, 85% yield). <sup>1</sup>H NMR (400 MHz, CDCl<sub>3</sub>)  $\delta$  7.26-7.40 (m, 5H), 6.85 (d, *J* = 2.4 Hz, 1H), 6.69 (dd, *J* = 8.8 Hz, 2.4 Hz, 1H), 6.45 (d, *J* = 8.8 Hz, 1H), 3.79 (s, 3H), 3.74 (d, *J* = 12.8 Hz, 1H), 3.66 (d, *J* = 12.8 Hz, 1H), 3.33 (d, *J* = 8.8 Hz, 1H), 3.12 (d, *J* = 8.8 Hz, 1H), 2.83-2.86 (m, 2H), 2.71-2.75 (m, 4H), 2.62 (d, *J* = 9.2 Hz, 1H), 2.15-2.22 (m, 1H), 2.03-2.10 (m, 1H); <sup>13</sup>C NMR (100 MHz, CDCl<sub>3</sub>)  $\delta$  153.4, 147.0, 138.8, 128.8, 128.3, 127.0, 112.3, 109.9, 108.1, 70.7, 65.8, 60.2, 56.1, 54.1, 50.0, 38.4, 37.1; ESI-MS  $m/z$  309.1 ( $M + H$ )<sup>+</sup>, HRMS calcd for C<sub>20</sub>H<sub>25</sub>N<sub>2</sub>O<sup>+</sup> ( $M + H$ )<sup>+</sup> 309.1961, found 309.1960; HPLC Chiralcel OD-H (hexane/*i*-PrOH = 90:10, 1.0 ml/min)  $\tau_{\text{major}} = 7.9$  min,  $\tau_{\text{minor}} = 6.3$  min;  $[\alpha]_{\text{D}}^{25} 52.2$  (*c* 1.0, CHCl<sub>3</sub>, 98% *ee*).

## V. Computational Results

### 1. Computational methods

All the density functional theory (DFT) computations were performed with Gaussian 09 program package.<sup>1</sup> Calculations were carried out with B3LYP.<sup>2</sup> The geometry optimization and frequency calculations were conducted with the basis set 6-31G(d)<sup>3-4</sup> for all the atoms except Cu and I atoms, for which the SDD<sup>5-6</sup> with effective core potential (ECP) was adopted. Single point energies were calculated with larger basis sets, Def2TZVP<sup>7</sup>. Solvent effect was conducted with self-consistent reaction field (SCRf) method based on SMD<sup>8</sup> model in acetonitrile. Frequency analysis was performed to obtain thermal corrections at 298.15K and to confirm the transition states with

only one imaginary frequency. Some structures shown in figures were generated with the CYLview<sup>9</sup>.

## 2. Computational results

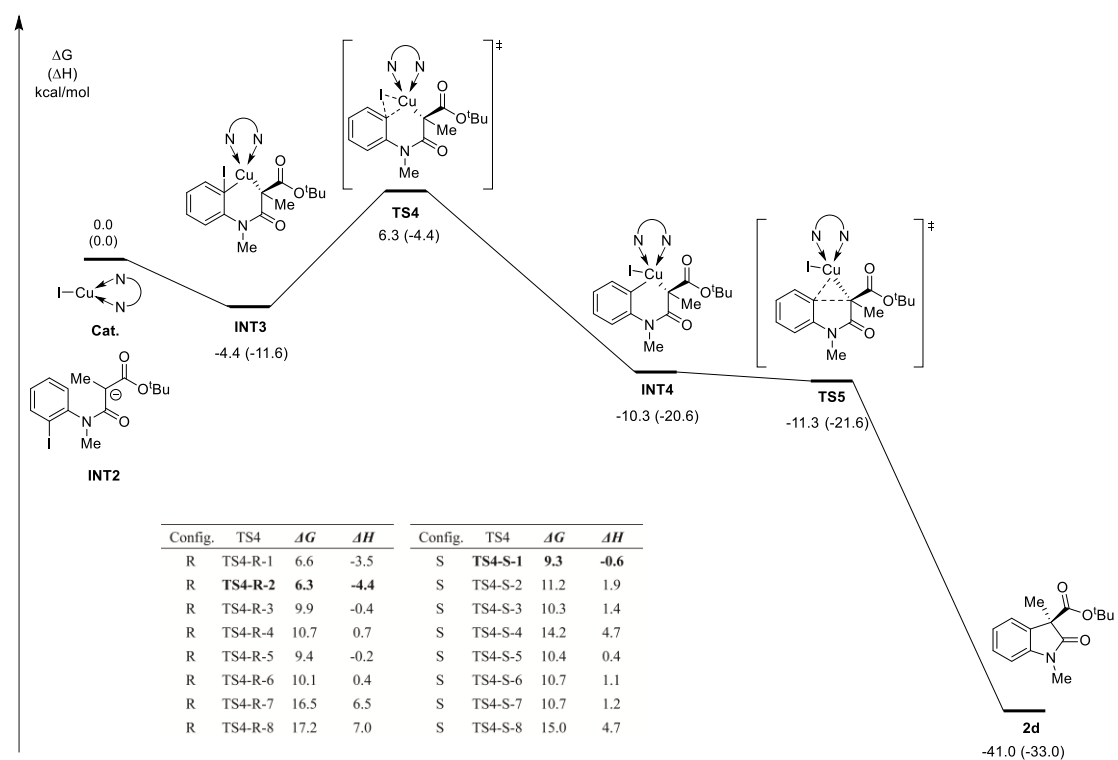

**Figure S1.** Potential Energy Surface. Free energies and enthalpies (in parenthesis) are given in kcal/mol.

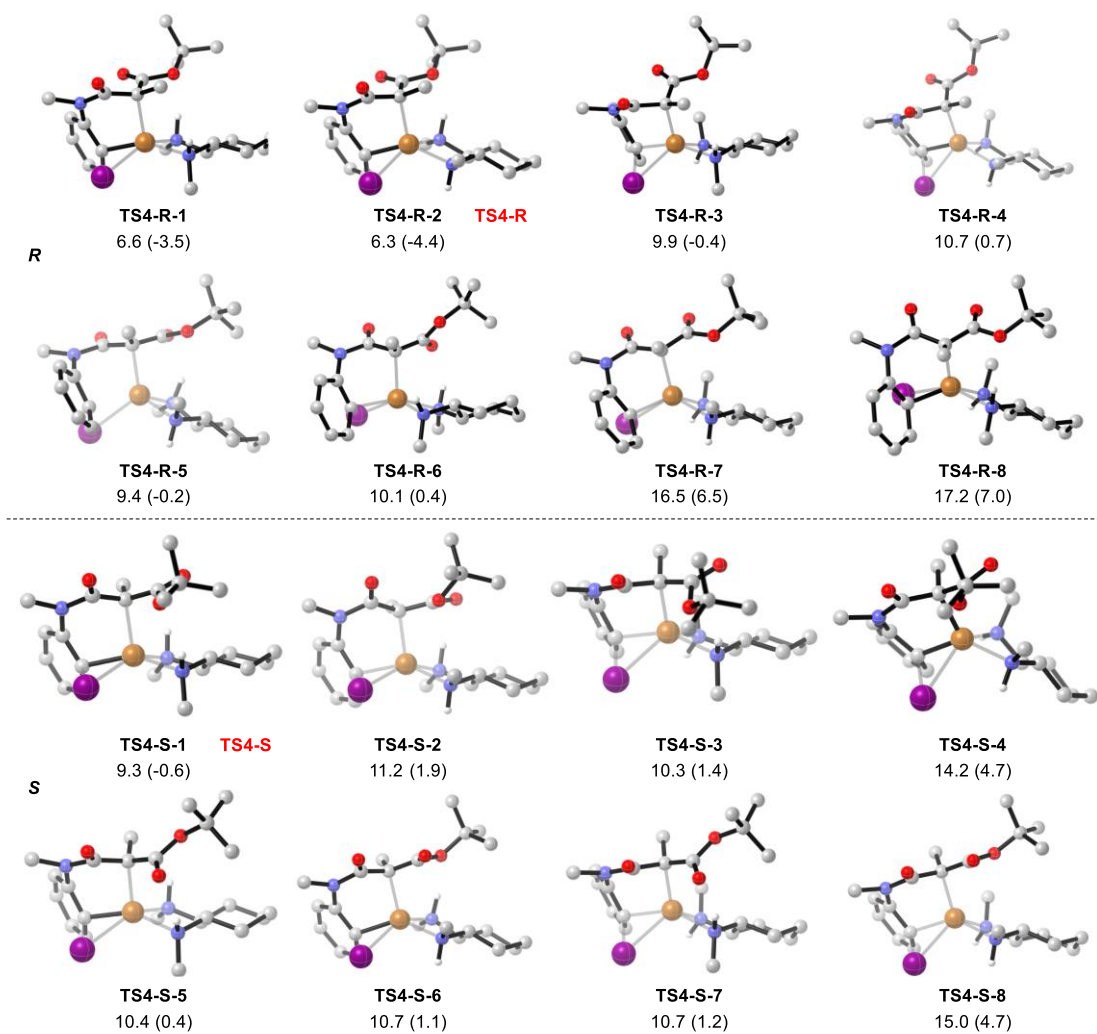

**Figure S2.** Conformation search of transition states,  $\Delta\Delta G, (\Delta\Delta H)$  relative to TS4-R-2. Free energies and enthalpies (in parenthesis) are given in kcal/mol. Some H atoms are hidden for simplicity.

**Table S1.** Energies of transition states. (units of H and G are Hartree)

|         | <i>H</i>     | <i>G</i>     |
|---------|--------------|--------------|
| TS4-R-1 | -3227.088742 | -3227.188774 |
| TS4-R-2 | -3227.090223 | -3227.189265 |
| TS4-R-3 | -3227.083824 | -3227.183598 |
| TS4-R-4 | -3227.082098 | -3227.182297 |
| TS4-R-5 | -3227.083486 | -3227.184258 |
| TS4-R-6 | -3227.082516 | -3227.183171 |
| TS4-R-7 | -3227.072833 | -3227.173001 |
| TS4-R-8 | -3227.072104 | -3227.171877 |
| TS4-S-1 | -3227.084217 | -3227.184520 |
| TS4-S-2 | -3227.080122 | -3227.181446 |
| TS4-S-3 | -3227.081054 | -3227.182871 |
| TS4-S-4 | -3227.075796 | -3227.176611 |
| TS4-S-5 | -3227.082511 | -3227.182788 |
| TS4-S-6 | -3227.081414 | -3227.182291 |
| TS4-S-7 | -3227.081336 | -3227.182295 |
| TS4-S-8 | -3227.075692 | -3227.175328 |
| Cat     | -2363.621847 | -2363.682633 |
| INT2    | -1161.447990 | -1161.522489 |
| INT3    | -3227.101760 | -3227.206317 |
| INT4    | -3227.115979 | -3227.215756 |
| TS5     | -3227.117620 | -3227.217337 |
| 2d      | -863.514000  | -863.582014  |
| I       | -297.986618  | -298.005826  |

## Cartesian Coordinates

### TS4-R-1.log

|    |           |           |           |
|----|-----------|-----------|-----------|
| C  | -0.438093 | 2.003849  | -0.585167 |
| C  | 1.722922  | 1.387104  | -1.666206 |
| C  | 2.346852  | 1.286598  | 0.729796  |
| C  | 2.397514  | 1.753273  | 3.122642  |
| O  | 2.187548  | 1.407433  | -2.806978 |
| N  | 2.573720  | 1.695599  | -0.596490 |
| C  | 1.966224  | -0.037560 | 1.043528  |
| H  | 2.557300  | 2.465568  | 3.927082  |
| C  | 3.920831  | 2.145175  | -0.959075 |
| C  | 1.863836  | -0.477289 | 2.370491  |
| H  | 4.415918  | 2.546211  | -0.072945 |
| H  | 4.515136  | 1.315752  | -1.362238 |
| H  | 3.853438  | 2.918538  | -1.726220 |
| H  | 1.640626  | -1.518593 | 2.573362  |
| C  | 2.512875  | 2.175722  | 1.796586  |
| H  | 2.717909  | 3.215042  | 1.562177  |
| I  | 2.804126  | -1.780756 | -0.386750 |
| Cu | 0.348235  | -0.635530 | -0.037133 |
| O  | 0.010224  | 2.843697  | 0.188673  |
| C  | 2.070815  | 0.428194  | 3.413673  |
| H  | 1.989186  | 0.088860  | 4.442644  |
| O  | -1.825750 | 1.827999  | -0.717861 |
| C  | -2.746391 | 2.912445  | -0.383845 |
| C  | -2.848334 | 3.086210  | 1.137199  |
| H  | -1.878866 | 3.367946  | 1.549427  |
| H  | -3.584374 | 3.862182  | 1.378008  |
| H  | -3.179808 | 2.154359  | 1.611279  |
| C  | -2.319012 | 4.212939  | -1.075602 |
| H  | -1.388401 | 4.596073  | -0.655348 |
| H  | -2.173516 | 4.033981  | -2.146710 |
| H  | -3.102510 | 4.969814  | -0.955692 |
| C  | -4.075984 | 2.421982  | -0.966211 |
| H  | -4.364935 | 1.464128  | -0.520317 |
| H  | -4.872040 | 3.147619  | -0.767350 |
| H  | -3.988935 | 2.282043  | -2.048485 |
| C  | 0.295457  | 1.052681  | -1.405731 |
| C  | -0.385737 | 0.559455  | -2.683473 |
| H  | 0.189189  | -0.263678 | -3.120767 |
| H  | -1.407498 | 0.226914  | -2.489916 |
| H  | -0.431358 | 1.343998  | -3.450048 |
| C  | -2.451857 | -1.446797 | 0.998167  |

|   |           |           |           |
|---|-----------|-----------|-----------|
| C | -2.369864 | -1.719486 | -0.519348 |
| C | -3.439355 | -2.715351 | -0.997190 |
| C | -4.849084 | -2.251163 | -0.611477 |
| C | -4.942834 | -2.081540 | 0.909260  |
| C | -3.894392 | -1.080046 | 1.409834  |
| H | -3.350583 | -2.844258 | -2.084078 |
| H | -2.550824 | -0.756082 | -1.011264 |
| H | -2.145503 | -2.349544 | 1.545073  |
| H | -5.071553 | -1.292763 | -1.102456 |
| H | -5.944890 | -1.745896 | 1.202302  |
| H | -4.783504 | -3.056184 | 1.393522  |
| H | -4.121567 | -0.087525 | 0.997018  |
| H | -3.954878 | -0.986950 | 2.499474  |
| H | -3.264032 | -3.699631 | -0.544125 |
| N | -1.472997 | -0.387982 | 1.318226  |
| N | -0.980141 | -2.091445 | -0.904721 |
| H | -0.881879 | -1.930871 | -1.906659 |
| C | -0.589690 | -3.485858 | -0.620259 |
| H | -1.200968 | -4.224985 | -1.152444 |
| H | 0.454026  | -3.614127 | -0.909344 |
| H | -0.663158 | -3.672027 | 0.454219  |
| C | -1.316899 | -0.088279 | 2.745280  |
| H | -0.918191 | -0.967818 | 3.260866  |
| H | -0.594315 | 0.721700  | 2.849056  |
| H | -2.253846 | 0.211108  | 3.235897  |
| H | -1.783613 | 0.461970  | 0.841508  |
| H | -5.593714 | -2.972232 | -0.968880 |

### TS4-R-2.log

|   |           |           |           |
|---|-----------|-----------|-----------|
| C | -0.235949 | 2.128781  | -0.606494 |
| C | 1.864372  | 1.248523  | -1.644634 |
| C | 2.413932  | 1.133629  | 0.768999  |
| C | 2.418286  | 1.681305  | 3.145911  |
| O | 2.351582  | 1.184593  | -2.774432 |
| N | 2.725505  | 1.473513  | -0.560522 |
| C | 1.866683  | -0.121774 | 1.108433  |
| H | 2.627088  | 2.399630  | 3.933538  |
| C | 4.130261  | 1.724040  | -0.893342 |
| C | 1.649977  | -0.495093 | 2.440988  |
| H | 4.644169  | 2.113257  | -0.012359 |
| H | 4.625640  | 0.801925  | -1.222618 |
| H | 4.187415  | 2.450180  | -1.705602 |
| H | 1.296706  | -1.494551 | 2.668167  |

|    |           |           |           |                    |           |           |           |
|----|-----------|-----------|-----------|--------------------|-----------|-----------|-----------|
| C  | 2.644178  | 2.034637  | 1.814550  | H                  | -1.039261 | -0.402175 | 3.132149  |
| H  | 2.981177  | 3.033021  | 1.556152  | H                  | -0.715054 | 1.188604  | 2.430823  |
| I  | 2.560365  | -2.037013 | -0.205307 | H                  | -2.374569 | 0.754995  | 2.912887  |
| Cu | 0.269328  | -0.585627 | -0.071841 | H                  | -1.917794 | 0.587291  | 0.505132  |
| O  | 0.284604  | 2.928122  | 0.164319  | H                  | -5.477681 | -3.603985 | -0.358558 |
| C  | 1.915745  | 0.418811  | 3.462999  | C                  | -0.775631 | -2.686175 | -2.106888 |
| H  | 1.745574  | 0.131650  | 4.497027  | H                  | 0.302457  | -2.721226 | -2.277223 |
| O  | -1.627411 | 2.102611  | -0.777690 | H                  | -1.201516 | -3.678940 | -2.298787 |
| C  | -2.445184 | 3.274211  | -0.474179 | H                  | -1.210432 | -1.972122 | -2.807372 |
| C  | -2.540933 | 3.501972  | 1.039175  | H                  | -0.706678 | -2.943950 | -0.089137 |
| H  | -1.554310 | 3.706693  | 1.455121  |                    |           |           |           |
| H  | -3.206152 | 4.348299  | 1.247026  |                    |           |           |           |
| H  | -2.959483 | 2.617984  | 1.533253  |                    |           |           |           |
| C  | -1.891300 | 4.505683  | -1.199943 |                    |           |           |           |
| H  | -0.923839 | 4.798067  | -0.789184 |                    |           |           |           |
| H  | -1.769682 | 4.286654  | -2.266428 |                    |           |           |           |
| H  | -2.589790 | 5.343681  | -1.095766 |                    |           |           |           |
| C  | -3.812415 | 2.886543  | -1.046189 |                    |           |           |           |
| H  | -4.187392 | 1.977426  | -0.561349 |                    |           |           |           |
| H  | -4.539253 | 3.689003  | -0.879875 |                    |           |           |           |
| H  | -3.736840 | 2.695982  | -2.121477 |                    |           |           |           |
| C  | 0.403177  | 1.090886  | -1.405979 |                    |           |           |           |
| C  | -0.329618 | 0.680936  | -2.685404 |                    |           |           |           |
| H  | 0.210557  | -0.129610 | -3.178319 |                    |           |           |           |
| H  | -1.350483 | 0.355182  | -2.471396 |                    |           |           |           |
| H  | -0.388358 | 1.509123  | -3.405204 |                    |           |           |           |
| C  | -2.530268 | -1.302447 | 1.000541  |                    |           |           |           |
| C  | -2.430702 | -1.891582 | -0.424147 |                    |           |           |           |
| C  | -3.383370 | -3.089016 | -0.592263 |                    |           |           |           |
| C  | -4.834407 | -2.722556 | -0.251052 |                    |           |           |           |
| C  | -4.935591 | -2.146489 | 1.165496  |                    |           |           |           |
| C  | -3.993472 | -0.947565 | 1.333734  |                    |           |           |           |
| H  | -3.326931 | -3.470340 | -1.617229 |                    |           |           |           |
| H  | -2.718935 | -1.102052 | -1.132487 |                    |           |           |           |
| H  | -2.185047 | -2.072071 | 1.709660  |                    |           |           |           |
| H  | -5.197713 | -1.977423 | -0.973557 |                    |           |           |           |
| H  | -5.967041 | -1.848608 | 1.388780  |                    |           |           |           |
| H  | -4.667615 | -2.924554 | 1.895334  |                    |           |           |           |
| H  | -4.310201 | -0.132884 | 0.664982  |                    |           |           |           |
| H  | -4.056098 | -0.558727 | 2.355534  |                    |           |           |           |
| H  | -3.043739 | -3.901801 | 0.068841  |                    |           |           |           |
| N  | -1.601541 | -0.167511 | 1.122110  |                    |           |           |           |
| N  | -1.015730 | -2.209530 | -0.730079 |                    |           |           |           |
| C  | -1.440540 | 0.374957  | 2.475695  |                    |           |           |           |
|    |           |           |           | <b>TS4-R-3.log</b> |           |           |           |
|    |           |           |           | C                  | -0.563400 | 2.056992  | -0.378417 |
|    |           |           |           | C                  | 1.648943  | 1.627693  | -1.440050 |
|    |           |           |           | C                  | 2.246447  | 1.224555  | 0.931983  |
|    |           |           |           | C                  | 2.195382  | 1.400644  | 3.366238  |
|    |           |           |           | O                  | 2.128333  | 1.822828  | -2.557720 |
|    |           |           |           | N                  | 2.466329  | 1.826832  | -0.320594 |
|    |           |           |           | C                  | 2.013487  | -0.161667 | 1.066256  |
|    |           |           |           | H                  | 2.246004  | 2.022191  | 4.255421  |
|    |           |           |           | C                  | 3.795818  | 2.387673  | -0.575650 |
|    |           |           |           | C                  | 1.961347  | -0.769000 | 2.331854  |
|    |           |           |           | H                  | 4.210874  | 2.769868  | 0.359229  |
|    |           |           |           | H                  | 4.474036  | 1.629338  | -0.988061 |
|    |           |           |           | H                  | 3.709790  | 3.198000  | -1.300626 |
|    |           |           |           | H                  | 1.876944  | -1.847990 | 2.404388  |
|    |           |           |           | C                  | 2.279094  | 1.990479  | 2.104967  |
|    |           |           |           | H                  | 2.357126  | 3.066933  | 1.997408  |
|    |           |           |           | I                  | 2.849659  | -1.632704 | -0.590025 |
|    |           |           |           | Cu                 | 0.360569  | -0.639048 | -0.127647 |
|    |           |           |           | O                  | -0.163506 | 2.839799  | 0.477466  |
|    |           |           |           | C                  | 2.041072  | 0.016794  | 3.482057  |
|    |           |           |           | H                  | 1.999220  | -0.456873 | 4.459185  |
|    |           |           |           | O                  | -1.929558 | 1.876087  | -0.600958 |
|    |           |           |           | C                  | -2.882256 | 2.947686  | -0.330872 |
|    |           |           |           | C                  | -3.080188 | 3.173587  | 1.174329  |
|    |           |           |           | H                  | -2.133656 | 3.442230  | 1.643677  |
|    |           |           |           | H                  | -3.806390 | 3.979580  | 1.333501  |
|    |           |           |           | H                  | -3.474463 | 2.271276  | 1.655466  |
|    |           |           |           | C                  | -2.425868 | 4.233280  | -1.031820 |
|    |           |           |           | H                  | -1.511740 | 4.620022  | -0.577161 |
|    |           |           |           | H                  | -2.233380 | 4.032361  | -2.091454 |
|    |           |           |           | H                  | -3.207540 | 4.997932  | -0.959662 |
|    |           |           |           | C                  | -4.171556 | 2.416979  | -0.965311 |

|                    |           |           |           |    |           |           |           |
|--------------------|-----------|-----------|-----------|----|-----------|-----------|-----------|
| H                  | -4.456997 | 1.463936  | -0.504027 | C  | 1.422985  | -1.065686 | 1.127569  |
| H                  | -4.991883 | 3.129075  | -0.823433 | H  | 3.145617  | 0.455096  | 4.237748  |
| H                  | -4.030599 | 2.251081  | -2.038276 | C  | 4.418956  | -0.450301 | -0.630187 |
| C                  | 0.233966  | 1.195902  | -1.251018 | C  | 0.969492  | -1.412481 | 2.409026  |
| C                  | -0.393612 | 0.867584  | -2.610729 | H  | 5.004544  | -0.464625 | 0.291244  |
| H                  | 0.199551  | 0.105574  | -3.127965 | H  | 4.392744  | -1.460409 | -1.058226 |
| H                  | -1.424657 | 0.523291  | -2.501554 | H  | 4.888946  | 0.215182  | -1.355934 |
| H                  | -0.409738 | 1.744623  | -3.270385 | H  | 0.174686  | -2.143038 | 2.517896  |
| C                  | -2.162703 | -1.959585 | 0.991526  | C  | 3.124138  | 0.325080  | 2.092312  |
| C                  | -2.319986 | -1.671021 | -0.518080 | H  | 3.929616  | 1.037815  | 1.950872  |
| C                  | -3.492848 | -2.454471 | -1.132117 | I  | 1.171551  | -2.931187 | -0.409927 |
| C                  | -4.802296 | -2.202882 | -0.373328 | Cu | -0.106067 | -0.508322 | -0.169642 |
| C                  | -4.635711 | -2.574023 | 1.105609  | O  | 1.713155  | 2.437397  | 0.572801  |
| C                  | -3.496281 | -1.762614 | 1.736683  | C  | 1.579570  | -0.852925 | 3.532657  |
| H                  | -3.593895 | -2.179989 | -2.190329 | H  | 1.228405  | -1.123564 | 4.524867  |
| H                  | -2.517174 | -0.596542 | -0.622468 | O  | -0.068176 | 3.068040  | -0.695622 |
| H                  | -1.872889 | -3.012762 | 1.101735  | C  | -0.051906 | 4.459572  | -0.252580 |
| H                  | -5.078021 | -1.141326 | -0.454747 | C  | -0.261648 | 4.580264  | 1.262763  |
| H                  | -5.566546 | -2.395565 | 1.657161  | H  | 0.552401  | 4.095778  | 1.802032  |
| H                  | -4.420112 | -3.649399 | 1.189669  | H  | -0.298338 | 5.639734  | 1.542911  |
| H                  | -3.773218 | -0.701704 | 1.709401  | H  | -1.211673 | 4.122914  | 1.559383  |
| H                  | -3.366505 | -2.029485 | 2.793165  | C  | 1.255143  | 5.129650  | -0.694340 |
| H                  | -3.275891 | -3.530592 | -1.102231 | H  | 2.107714  | 4.710524  | -0.157762 |
| N                  | -1.027222 | -1.161758 | 1.529982  | H  | 1.406186  | 4.978842  | -1.768838 |
| N                  | -1.021973 | -1.887428 | -1.210006 | H  | 1.206657  | 6.207104  | -0.499184 |
| H                  | -1.075515 | -1.440032 | -2.122475 | C  | -1.243011 | 5.060893  | -1.004817 |
| C                  | -0.585441 | -3.280111 | -1.402631 | H  | -2.169416 | 4.546164  | -0.725981 |
| H                  | -1.271536 | -3.874067 | -2.020389 | H  | -1.350887 | 6.124252  | -0.764204 |
| H                  | 0.397385  | -3.261656 | -1.878742 | H  | -1.104329 | 4.956298  | -2.085580 |
| H                  | -0.469317 | -3.770776 | -0.433013 | C  | 0.933578  | 1.002927  | -1.216657 |
| H                  | -5.617432 | -2.778057 | -0.828293 | C  | 0.202984  | 1.191685  | -2.549303 |
| H                  | -0.514745 | -1.720997 | 2.205887  | H  | 0.275350  | 0.280822  | -3.144603 |
| C                  | -1.363601 | 0.133454  | 2.153788  | H  | -0.849999 | 1.436860  | -2.387967 |
| H                  | -1.941372 | 0.030680  | 3.081943  | H  | 0.644579  | 2.002042  | -3.144533 |
| H                  | -0.437632 | 0.668488  | 2.363926  | C  | -2.951212 | -0.664214 | 0.983492  |
| H                  | -1.927459 | 0.726194  | 1.439676  | C  | -3.113645 | -0.652046 | -0.553716 |
|                    |           |           |           | C  | -4.444705 | -1.309494 | -0.966745 |
|                    |           |           |           | C  | -5.654126 | -0.702807 | -0.242750 |
| <b>TS4-R-4.log</b> |           |           |           | C  | -5.473636 | -0.770404 | 1.278303  |
| C                  | 0.940866  | 2.193844  | -0.350103 | C  | -4.177585 | -0.060875 | 1.690250  |
| C                  | 2.280316  | 0.388119  | -1.435334 | H  | -4.578663 | -1.227813 | -2.050605 |
| C                  | 2.542059  | -0.232278 | 0.946572  | H  | -3.099436 | 0.390381  | -0.900453 |
| C                  | 2.662773  | 0.015010  | 3.370092  | H  | -2.878756 | -1.722443 | 1.279148  |
| O                  | 2.731470  | 0.190104  | -2.563882 | H  | -5.772119 | 0.347177  | -0.547469 |
| N                  | 3.067157  | 0.029690  | -0.332795 |    |           |           |           |

|                    |           |           |           |   |           |           |           |
|--------------------|-----------|-----------|-----------|---|-----------|-----------|-----------|
| H                  | -6.329759 | -0.315119 | 1.790102  | C | 4.200172  | 1.665059  | -0.683581 |
| H                  | -5.437546 | -1.822588 | 1.596548  | H | 4.281594  | 0.786188  | -0.033941 |
| H                  | -4.260916 | 1.002365  | 1.430920  | H | 5.208537  | 2.075038  | -0.815685 |
| H                  | -4.029335 | -0.112030 | 2.776624  | H | 3.809541  | 1.359024  | -1.654238 |
| H                  | -4.383849 | -2.384796 | -0.735875 | C | 3.164851  | 3.965219  | -0.931383 |
| N                  | -1.654047 | -0.062409 | 1.369234  | H | 2.477143  | 4.684443  | -0.472915 |
| N                  | -1.924215 | -1.304878 | -1.144531 | H | 2.786619  | 3.699784  | -1.919982 |
| H                  | -6.569522 | -1.223107 | -0.548559 | H | 4.143890  | 4.445585  | -1.041531 |
| C                  | -1.918106 | -1.404775 | -2.614840 | C | 3.819110  | 3.101334  | 1.343886  |
| H                  | -0.942478 | -1.786775 | -2.924402 | H | 3.165266  | 3.843621  | 1.813047  |
| H                  | -2.701647 | -2.067151 | -3.004975 | H | 4.828524  | 3.520387  | 1.268169  |
| H                  | -2.050028 | -0.409890 | -3.042610 | H | 3.857729  | 2.219103  | 1.993103  |
| H                  | -1.872140 | -2.257346 | -0.776350 | C | -0.596031 | 2.635099  | 1.036917  |
| H                  | -1.333878 | -0.486357 | 2.235691  | H | 0.300351  | 3.171840  | 1.347992  |
| C                  | -1.616750 | 1.400669  | 1.534212  | H | -0.914627 | 2.018441  | 1.882653  |
| H                  | -0.593180 | 1.679703  | 1.788457  | H | -1.386214 | 3.374905  | 0.865698  |
| H                  | -1.855094 | 1.882230  | 0.585201  | C | 2.091221  | -2.016365 | -0.407527 |
| H                  | -2.293750 | 1.772306  | 2.315222  | C | 2.229038  | -1.402190 | 1.006072  |
|                    |           |           |           | C | 3.117673  | -2.275760 | 1.908489  |
| <b>TS4-R-5.log</b> |           |           |           | C | 4.496072  | -2.537284 | 1.286921  |
| C                  | -1.403923 | 1.757586  | -1.250758 | C | 4.350096  | -3.183232 | -0.095415 |
| C                  | -2.968835 | 1.026855  | 0.548402  | C | 3.478680  | -2.314028 | -1.010698 |
| C                  | -3.784953 | 1.169056  | 2.846405  | H | 3.228975  | -1.803903 | 2.891188  |
| O                  | -1.298896 | 1.816212  | -2.472116 | H | 2.683158  | -0.410783 | 0.890977  |
| N                  | -2.723604 | 1.649814  | -0.696953 | H | 1.531705  | -2.960045 | -0.310022 |
| C                  | -2.529112 | -0.285044 | 0.831214  | H | 5.036114  | -1.584258 | 1.189102  |
| H                  | -4.288924 | 1.738337  | 3.621937  | H | 5.333696  | -3.341957 | -0.553677 |
| C                  | -3.851444 | 1.771574  | -1.619442 | H | 3.889865  | -4.176356 | 0.014397  |
| C                  | -2.666260 | -0.842257 | 2.108944  | H | 3.983504  | -1.354798 | -1.194653 |
| H                  | -3.587035 | 2.483624  | -2.401359 | H | 3.356764  | -2.796600 | -1.986401 |
| H                  | -4.728926 | 2.129451  | -1.071715 | H | 2.607047  | -3.237961 | 2.073803  |
| H                  | -4.096485 | 0.813269  | -2.097034 | N | 1.272272  | -1.127454 | -1.247613 |
| H                  | -2.334327 | -1.858590 | 2.294387  | N | 0.888340  | -1.147892 | 1.592993  |
| C                  | -3.614385 | 1.723940  | 1.577959  | C | 0.826216  | -1.691804 | -2.527665 |
| H                  | -3.939155 | 2.739473  | 1.370965  | H | 0.212765  | -2.578886 | -2.341771 |
| I                  | -2.402874 | -1.768559 | -0.856160 | H | 0.213373  | -0.937227 | -3.026253 |
| Cu                 | -0.272259 | -0.270793 | 0.041907  | H | 1.656251  | -1.973068 | -3.190760 |
| C                  | -3.277435 | -0.102168 | 3.123343  | H | 1.783525  | -0.267288 | -1.467493 |
| H                  | -3.386615 | -0.538030 | 4.112635  | H | 5.093691  | -3.171758 | 1.952526  |
| C                  | -0.307460 | 1.840087  | -0.249637 | C | 0.903671  | -0.211499 | 2.734367  |
| C                  | 1.055685  | 1.902954  | -0.764564 | H | -0.122566 | -0.078220 | 3.084653  |
| O                  | 1.466689  | 1.658084  | -1.899550 | H | 1.528462  | -0.552422 | 3.572089  |
| O                  | 1.968440  | 2.183173  | 0.256842  | H | 1.270699  | 0.752127  | 2.373116  |
| C                  | 3.288881  | 2.721422  | -0.042526 | H | 0.485811  | -2.038185 | 1.889409  |



**TS4-R-6.log**

|    |           |           |           |
|----|-----------|-----------|-----------|
| C  | 1.049474  | 2.229670  | -0.033337 |
| C  | 2.675925  | 0.799751  | -1.252211 |
| C  | 3.537709  | -0.480871 | -3.143600 |
| O  | 0.981111  | 3.089141  | 0.839646  |
| N  | 2.302724  | 2.033093  | -0.681150 |
| C  | 2.524690  | -0.419177 | -0.544853 |
| H  | 3.934206  | -0.493586 | -4.154787 |
| C  | 3.378478  | 2.964884  | -0.336052 |
| C  | 2.898288  | -1.643099 | -1.124017 |
| H  | 2.955285  | 3.962446  | -0.217108 |
| H  | 4.123454  | 2.970122  | -1.136306 |
| H  | 3.865839  | 2.684656  | 0.606983  |
| H  | 2.830211  | -2.553080 | -0.538597 |
| C  | 3.177184  | 0.736035  | -2.556662 |
| H  | 3.254612  | 1.663589  | -3.116975 |
| I  | 2.718385  | -0.369728 | 1.727649  |
| Cu | 0.498252  | -0.543844 | 0.038354  |
| C  | 3.381165  | -1.672815 | -2.434946 |
| H  | 3.665443  | -2.622365 | -2.880440 |
| C  | -0.089784 | 1.423126  | -0.554627 |
| C  | -1.329539 | 1.689405  | 0.198150  |
| O  | -1.491634 | 1.576724  | 1.413972  |
| O  | -2.364498 | 2.038904  | -0.632439 |
| C  | -3.600550 | 2.629756  | -0.124330 |
| C  | -4.404115 | 1.622860  | 0.704619  |
| H  | -4.594263 | 0.718219  | 0.116444  |
| H  | -5.372666 | 2.056799  | 0.979111  |
| H  | -3.863704 | 1.354638  | 1.612713  |
| C  | -3.276255 | 3.896282  | 0.676300  |
| H  | -2.669519 | 4.576070  | 0.068887  |
| H  | -2.720879 | 3.653213  | 1.583331  |
| H  | -4.205058 | 4.409518  | 0.950854  |
| C  | -4.353234 | 2.980138  | -1.411248 |
| H  | -3.764044 | 3.673191  | -2.019941 |
| H  | -5.315058 | 3.448642  | -1.175604 |
| H  | -4.539613 | 2.076920  | -2.002836 |
| C  | -0.253473 | 1.465383  | -2.081706 |
| H  | 0.619897  | 1.055980  | -2.594517 |
| H  | -0.415392 | 2.484534  | -2.460424 |
| H  | -1.125795 | 0.880600  | -2.392161 |
| C  | -1.972293 | -2.149421 | 0.682770  |
| C  | -1.984623 | -1.764317 | -0.814393 |
| C  | -3.041523 | -2.566342 | -1.594070 |

|   |           |           |           |
|---|-----------|-----------|-----------|
| C | -4.440057 | -2.398691 | -0.986618 |
| C | -4.435488 | -2.838503 | 0.483055  |
| C | -3.387729 | -2.054793 | 1.284731  |
| H | -3.030515 | -2.248970 | -2.645323 |
| H | -2.251516 | -0.701177 | -0.871958 |
| H | -1.621897 | -3.187777 | 0.764753  |
| H | -4.746399 | -1.345225 | -1.054217 |
| H | -5.426604 | -2.699642 | 0.931516  |
| H | -4.212974 | -3.914525 | 0.537548  |
| H | -3.672122 | -0.996208 | 1.314087  |
| H | -3.368047 | -2.403447 | 2.323582  |
| H | -2.781624 | -3.633329 | -1.581081 |
| N | -0.995110 | -1.309766 | 1.412647  |
| N | -0.614282 | -1.850300 | -1.379978 |
| C | -0.553544 | -1.892617 | 2.688031  |
| H | 0.064405  | -2.775096 | 2.493212  |
| H | 0.058932  | -1.156936 | 3.212076  |
| H | -1.388654 | -2.181682 | 3.341887  |
| H | -1.412112 | -0.391810 | 1.610446  |
| H | -5.172208 | -2.978247 | -1.561825 |
| C | -0.106359 | -3.197074 | -1.674354 |
| H | -0.711850 | -3.752702 | -2.403712 |
| H | 0.907194  | -3.097051 | -2.066990 |
| H | -0.053474 | -3.779683 | -0.750183 |
| H | -0.586450 | -1.296268 | -2.233988 |

**TS4-R-7.log**

|    |           |           |           |
|----|-----------|-----------|-----------|
| C  | -1.557009 | 1.930173  | -0.943287 |
| C  | -2.899755 | 0.872116  | 0.852896  |
| C  | -3.572356 | 0.437527  | 3.156495  |
| O  | -1.596690 | 2.206562  | -2.135331 |
| N  | -2.797931 | 1.738072  | -0.254239 |
| C  | -2.303129 | -0.411098 | 0.824571  |
| H  | -4.076842 | 0.772802  | 4.058026  |
| C  | -4.024055 | 2.052815  | -0.987856 |
| C  | -2.332819 | -1.249428 | 1.949206  |
| H  | -3.838113 | 2.917175  | -1.625466 |
| H  | -4.823187 | 2.282770  | -0.277237 |
| H  | -4.342238 | 1.217313  | -1.625208 |
| H  | -1.915567 | -2.248781 | 1.883171  |
| C  | -3.534917 | 1.269057  | 2.034143  |
| H  | -3.965299 | 2.265732  | 2.072215  |
| I  | -2.531900 | -1.583686 | -1.196007 |
| Cu | -0.329469 | -0.303791 | 0.086109  |



|                    |           |           |           |    |           |           |           |
|--------------------|-----------|-----------|-----------|----|-----------|-----------|-----------|
| H                  | 4.213518  | 1.484460  | 1.471625  | H  | 3.844868  | 2.569023  | 1.842962  |
| C                  | -0.395915 | 2.144178  | 1.669872  | H  | 4.811351  | 1.077288  | 1.662091  |
| H                  | 0.573993  | 2.535679  | 1.979529  | H  | 4.211305  | 1.945946  | 0.223290  |
| H                  | -0.634116 | 1.292642  | 2.318936  | H  | 1.850530  | -2.785969 | -1.352688 |
| H                  | -1.147433 | 2.913296  | 1.882010  | C  | 3.551153  | -1.384165 | 1.835547  |
| C                  | 2.013838  | -2.185177 | -0.347265 | H  | 4.009158  | -0.985024 | 2.736224  |
| C                  | 2.481470  | -1.167047 | 0.715132  | I  | 2.047595  | 0.324462  | -2.009211 |
| C                  | 3.647231  | -1.708959 | 1.563116  | Cu | 0.190243  | -0.585986 | -0.144945 |
| C                  | 4.804506  | -2.227740 | 0.701251  | C  | 3.018330  | -3.263963 | 0.404702  |
| C                  | 4.300605  | -3.319838 | -0.250297 | H  | 3.095986  | -4.319765 | 0.160325  |
| C                  | 3.193995  | -2.759271 | -1.151399 | C  | 0.304372  | 0.760243  | 1.547859  |
| H                  | 3.988786  | -0.919061 | 2.244879  | C  | -2.418605 | -2.234415 | 0.055450  |
| H                  | 2.830637  | -0.282642 | 0.176065  | C  | -2.728258 | -0.803502 | -0.434228 |
| H                  | 1.517057  | -3.009499 | 0.183711  | C  | -4.110555 | -0.731238 | -1.105170 |
| H                  | 5.232533  | -1.401778 | 0.114368  | C  | -5.214313 | -1.201330 | -0.148662 |
| H                  | 5.120211  | -3.708085 | -0.866675 | C  | -4.932775 | -2.632593 | 0.326285  |
| H                  | 3.916310  | -4.167206 | 0.336315  | C  | -3.548114 | -2.728411 | 0.981524  |
| H                  | 3.630300  | -1.962246 | -1.765888 | H  | -4.295418 | 0.299010  | -1.434106 |
| H                  | 2.823765  | -3.525309 | -1.845310 | H  | -2.752358 | -0.159710 | 0.450531  |
| H                  | 3.294063  | -2.536510 | 2.192568  | H  | -2.349141 | -2.901552 | -0.815506 |
| N                  | 0.956360  | -1.569303 | -1.197518 | H  | -5.256922 | -0.528457 | 0.719251  |
| N                  | 1.325302  | -0.688980 | 1.508963  | H  | -5.702776 | -2.965221 | 1.032796  |
| H                  | 5.607627  | -2.609852 | 1.342848  | H  | -4.977607 | -3.316722 | -0.534175 |
| C                  | 0.980840  | -1.441113 | 2.719337  | H  | -3.536223 | -2.106500 | 1.889398  |
| H                  | 1.763503  | -1.432845 | 3.490881  | H  | -3.349684 | -3.758990 | 1.297963  |
| H                  | 0.067287  | -1.014626 | 3.138987  | H  | -4.129789 | -1.363965 | -2.002968 |
| H                  | 0.765183  | -2.482317 | 2.457953  | N  | -1.091173 | -2.261783 | 0.712112  |
| H                  | 1.495041  | 0.287298  | 1.741080  | N  | -1.612850 | -0.278249 | -1.264799 |
| H                  | 0.344536  | -2.311967 | -1.532116 | H  | -1.648558 | 0.742278  | -1.232013 |
| C                  | 1.400506  | -0.797107 | -2.380507 | C  | -1.591822 | -0.726532 | -2.666847 |
| H                  | 0.517920  | -0.335056 | -2.827040 | H  | -2.472111 | -0.404559 | -3.237943 |
| H                  | 2.058193  | 0.011985  | -2.069042 | H  | -0.696142 | -0.326033 | -3.144104 |
| H                  | 1.907335  | -1.417495 | -3.129893 | H  | -1.533226 | -1.818370 | -2.702570 |
| <b>TS4-S-1.log</b> |           |           |           | C  | -0.524177 | -3.605825 | 0.876224  |
| C                  | 1.524167  | 1.575526  | 1.293061  | H  | -0.302693 | -4.022730 | -0.111393 |
| C                  | 2.841370  | -0.505651 | 1.013081  | H  | 0.418256  | -3.525386 | 1.421218  |
| C                  | 3.654566  | -2.746815 | 1.532398  | H  | -1.186480 | -4.303467 | 1.409330  |
| O                  | 1.566620  | 2.795562  | 1.148074  | H  | -1.189711 | -1.839048 | 1.635646  |
| N                  | 2.749967  | 0.866825  | 1.322852  | H  | -6.191324 | -1.145232 | -0.643701 |
| C                  | 2.194069  | -1.047735 | -0.125990 | C  | -0.969961 | 1.435624  | 1.357453  |
| H                  | 4.227695  | -3.399283 | 2.184714  | O  | -1.984807 | 1.265180  | 2.038197  |
| C                  | 3.979907  | 1.659549  | 1.257546  | O  | -0.998618 | 2.217472  | 0.219862  |
| C                  | 2.303531  | -2.411097 | -0.441750 | C  | -1.782077 | 3.449894  | 0.187911  |
|                    |           |           |           | C  | -1.173892 | 4.198015  | -1.000504 |

|                    |           |           |           |                    |           |           |           |
|--------------------|-----------|-----------|-----------|--------------------|-----------|-----------|-----------|
| H                  | -1.268591 | 3.602621  | -1.916354 | H                  | 2.781466  | -0.215367 | 0.087688  |
| H                  | -1.684276 | 5.155270  | -1.155280 | H                  | 2.053509  | -3.163027 | 0.341363  |
| H                  | -0.111191 | 4.378430  | -0.815779 | H                  | 5.310933  | -0.827214 | 0.036500  |
| C                  | -1.571167 | 4.240937  | 1.483806  | H                  | 5.596313  | -3.048151 | -1.040370 |
| H                  | -2.053563 | 3.746232  | 2.329853  | H                  | 4.603056  | -3.807035 | 0.201697  |
| H                  | -0.498018 | 4.318090  | 1.682500  | H                  | 3.654041  | -1.679298 | -1.802175 |
| H                  | -1.993803 | 5.246543  | 1.377854  | H                  | 3.252685  | -3.398562 | -1.847189 |
| C                  | -3.259503 | 3.121183  | -0.054900 | H                  | 3.652967  | -2.301719 | 2.159348  |
| H                  | -3.653839 | 2.530174  | 0.773380  | N                  | 1.045373  | -1.975843 | -1.037769 |
| H                  | -3.844099 | 4.043573  | -0.153411 | N                  | 1.400052  | -0.803365 | 1.518302  |
| H                  | -3.374621 | 2.549574  | -0.984869 | C                  | 0.433213  | -3.150433 | -1.667973 |
| C                  | 0.363430  | -0.090483 | 2.821419  | H                  | 0.109359  | -3.846877 | -0.887250 |
| H                  | -0.642630 | -0.435327 | 3.076469  | H                  | -0.455282 | -2.835049 | -2.217409 |
| H                  | 1.020357  | -0.960202 | 2.719825  | H                  | 1.104179  | -3.686283 | -2.355413 |
| H                  | 0.720480  | 0.487981  | 3.685333  | H                  | 1.297010  | -1.289694 | -1.753634 |
|                    |           |           |           | H                  | 5.939668  | -1.972181 | 1.220384  |
|                    |           |           |           | C                  | 1.089602  | 1.334882  | -1.232174 |
| <b>TS4-S-2.log</b> |           |           |           | O                  | 2.033294  | 0.878734  | -1.899608 |
| C                  | -1.368772 | 1.885180  | -0.942131 | O                  | 1.320986  | 2.160053  | -0.161836 |
| C                  | -2.912580 | -0.059257 | -1.002979 | C                  | 2.287735  | 3.248462  | -0.270744 |
| C                  | -3.881806 | -2.031131 | -2.061121 | C                  | 1.906363  | 4.153866  | 0.903013  |
| O                  | -1.236478 | 3.059587  | -0.606171 | H                  | 2.024966  | 3.623036  | 1.854448  |
| N                  | -2.678523 | 1.330933  | -0.976108 | H                  | 2.544907  | 5.044195  | 0.924046  |
| C                  | -2.317164 | -0.916440 | -0.045533 | H                  | 0.859915  | 4.455345  | 0.805136  |
| H                  | -4.501075 | -2.455106 | -2.846281 | C                  | 2.081275  | 3.983738  | -1.600000 |
| C                  | -3.824730 | 2.206166  | -0.744426 | H                  | 2.370409  | 3.353367  | -2.445014 |
| C                  | -2.495713 | -2.306151 | -0.102012 | H                  | 1.024851  | 4.252058  | -1.699523 |
| H                  | -4.604397 | 2.031304  | -1.494014 | H                  | 2.688276  | 4.895808  | -1.622506 |
| H                  | -4.250462 | 2.041425  | 0.253893  | C                  | 3.717819  | 2.713938  | -0.125619 |
| H                  | -3.473933 | 3.235470  | -0.810699 | H                  | 3.954096  | 2.039586  | -0.950280 |
| H                  | -2.066699 | -2.933284 | 0.671748  | H                  | 4.432717  | 3.545586  | -0.119898 |
| C                  | -3.695528 | -0.645939 | -1.999870 | H                  | 3.826619  | 2.166586  | 0.818327  |
| H                  | -4.129835 | -0.001455 | -2.758692 | C                  | -0.583626 | 0.263327  | -2.752531 |
| I                  | -2.165819 | -0.085524 | 2.120660  | H                  | 0.353454  | 0.156908  | -3.304128 |
| Cu                 | -0.267556 | -0.553098 | 0.148625  | H                  | -1.037240 | -0.727635 | -2.656185 |
| C                  | -3.258430 | -2.864224 | -1.132576 | H                  | -1.265643 | 0.859410  | -3.371009 |
| H                  | -3.390495 | -3.941603 | -1.178603 | C                  | 1.580590  | 0.326471  | 2.452589  |
| C                  | -0.300296 | 0.963946  | -1.413554 | H                  | 1.807756  | 1.215307  | 1.866047  |
| C                  | 2.272369  | -2.272001 | -0.269436 | H                  | 0.639140  | 0.498281  | 2.975729  |
| C                  | 2.596771  | -1.108773 | 0.692625  | H                  | 2.369528  | 0.150235  | 3.194148  |
| C                  | 3.858223  | -1.432875 | 1.513325  | H                  | 1.168880  | -1.635464 | 2.065962  |
| C                  | 5.061751  | -1.732234 | 0.608328  |                    |           |           |           |
| C                  | 4.750164  | -2.875161 | -0.364418 |                    |           |           |           |
| C                  | 3.484657  | -2.565354 | -1.173931 | <b>TS4-S-3.log</b> |           |           |           |
| H                  | 4.099873  | -0.595350 | 2.175504  | C                  | -1.742650 | 1.510053  | -1.157090 |

|    |           |           |           |                    |           |           |           |
|----|-----------|-----------|-----------|--------------------|-----------|-----------|-----------|
| C  | -2.778520 | -0.738550 | -0.927890 | O                  | 0.716730  | 2.439283  | -0.183191 |
| C  | -3.313018 | -3.015836 | -1.630315 | C                  | 1.354220  | 3.752572  | -0.140570 |
| O  | -1.932482 | 2.709992  | -0.972408 | C                  | 0.715776  | 4.390837  | 1.095158  |
| N  | -2.868259 | 0.653553  | -1.138963 | H                  | 0.924059  | 3.787682  | 1.986515  |
| C  | -2.075802 | -1.280809 | 0.175276  | H                  | 1.114418  | 5.398759  | 1.256471  |
| H  | -3.793401 | -3.681588 | -2.341229 | H                  | -0.368261 | 4.445523  | 0.961624  |
| C  | -4.180299 | 1.282840  | -0.971651 | C                  | 0.996366  | 4.547064  | -1.401356 |
| C  | -2.041195 | -2.668790 | 0.394751  | H                  | 1.490144  | 4.129292  | -2.281772 |
| H  | -4.213556 | 2.199092  | -1.562027 | H                  | -0.086920 | 4.508641  | -1.550070 |
| H  | -4.957929 | 0.593661  | -1.309589 | H                  | 1.310447  | 5.590658  | -1.285462 |
| H  | -4.362919 | 1.544661  | 0.078713  | C                  | 2.870277  | 3.597428  | 0.033467  |
| H  | -1.564989 | -3.054738 | 1.289774  | H                  | 3.295251  | 3.072761  | -0.823834 |
| C  | -3.368526 | -1.633262 | -1.827876 | H                  | 3.343832  | 4.581835  | 0.128320  |
| H  | -3.862613 | -1.220008 | -2.702684 | H                  | 3.094431  | 3.029149  | 0.945822  |
| I  | -1.933152 | -0.022121 | 2.082241  | C                  | -0.485672 | 0.161497  | -2.881178 |
| Cu | -0.072346 | -0.551981 | 0.054603  | H                  | 0.528385  | -0.102053 | -3.186077 |
| C  | -2.638984 | -3.534577 | -0.523084 | H                  | -1.094127 | -0.746170 | -2.876236 |
| H  | -2.602457 | -4.606939 | -0.351251 | H                  | -0.891569 | 0.826725  | -3.657545 |
| C  | -0.446215 | 0.858838  | -1.513875 | H                  | 0.657816  | -3.164690 | 0.263823  |
| C  | 2.489683  | -2.222073 | 0.200262  | C                  | 0.910502  | -2.738684 | -1.707898 |
| C  | 2.826194  | -0.713094 | 0.207951  | H                  | -0.161857 | -2.774946 | -1.909525 |
| C  | 4.271696  | -0.452835 | 0.667292  | H                  | 1.338252  | -1.937164 | -2.310701 |
| C  | 5.288305  | -1.260580 | -0.148418 | H                  | 1.363395  | -3.693593 | -2.006380 |
| C  | 4.968797  | -2.758304 | -0.056950 |                    |           |           |           |
| C  | 3.548099  | -3.033635 | -0.568415 |                    |           |           |           |
| H  | 4.474882  | 0.622997  | 0.598151  | <b>TS4-S-4.log</b> |           |           |           |
| H  | 2.715060  | -0.335309 | -0.815945 | C                  | -2.578248 | -0.704995 | -0.616574 |
| H  | 2.497302  | -2.565632 | 1.243018  | C                  | -1.077299 | -2.685598 | -0.564529 |
| H  | 5.255789  | -0.943374 | -1.200381 | C                  | 0.308874  | -4.474901 | -1.482791 |
| H  | 5.690440  | -3.346512 | -0.636531 | O                  | -3.703994 | -0.290585 | -0.352878 |
| H  | 5.059245  | -3.087814 | 0.988743  | N                  | -2.332330 | -2.074977 | -0.413828 |
| H  | 3.510297  | -2.764968 | -1.631438 | C                  | 0.074041  | -2.157366 | 0.059631  |
| H  | 3.310130  | -4.103252 | -0.501640 | H                  | 0.387676  | -5.372926 | -2.088494 |
| H  | 4.378919  | -0.731933 | 1.724020  | C                  | -3.488255 | -2.893399 | -0.038292 |
| N  | 1.089758  | -2.421807 | -0.278683 | C                  | 1.308202  | -2.817750 | -0.039304 |
| N  | 1.803655  | 0.018220  | 0.993388  | H                  | -4.209934 | -2.967652 | -0.859883 |
| H  | 1.821095  | 1.004578  | 0.732357  | H                  | -3.141371 | -3.890365 | 0.238228  |
| C  | 1.891471  | -0.068681 | 2.457637  | H                  | -3.994166 | -2.432427 | 0.813012  |
| H  | 2.823749  | 0.343214  | 2.866865  | H                  | 2.156858  | -2.445619 | 0.524191  |
| H  | 1.050668  | 0.486930  | 2.877538  | C                  | -0.925993 | -3.835012 | -1.351960 |
| H  | 1.796824  | -1.108725 | 2.783553  | H                  | -1.797519 | -4.215453 | -1.877264 |
| H  | 6.304355  | -1.059932 | 0.212134  | I                  | -0.235501 | -1.228384 | 2.281153  |
| C  | 0.747825  | 1.679182  | -1.339680 | Cu                 | 0.330859  | -0.150192 | -0.254381 |
| O  | 1.758311  | 1.641936  | -2.042256 | C                  | 1.432276  | -3.960985 | -0.833123 |
|    |           |           |           | H                  | 2.393059  | -4.463850 | -0.903832 |

|   |           |           |           |                    |           |           |           |
|---|-----------|-----------|-----------|--------------------|-----------|-----------|-----------|
| C | -1.479390 | 0.085999  | -1.270761 | H                  | 2.438146  | -1.171069 | -1.649225 |
| C | 3.266076  | 0.315930  | -0.509803 | C                  | 2.055373  | 0.552220  | -2.698214 |
| C | 2.813089  | 1.664800  | 0.080813  | H                  | 2.997195  | 0.809938  | -3.199572 |
| C | 3.842838  | 2.184790  | 1.100539  | H                  | 1.462108  | -0.066507 | -3.371671 |
| C | 5.258479  | 2.266376  | 0.512639  | H                  | 1.481824  | 1.463032  | -2.507312 |
| C | 5.694783  | 0.904871  | -0.045003 |                    |           |           |           |
| C | 4.689241  | 0.404809  | -1.091943 |                    |           |           |           |
| H | 3.527062  | 3.163753  | 1.478396  | <b>TS4-S-5.log</b> |           |           |           |
| H | 2.727540  | 2.389246  | -0.739015 | C                  | 1.279025  | 2.209336  | 0.392696  |
| H | 3.286214  | -0.404886 | 0.321708  | C                  | 2.773884  | 0.429926  | 1.276080  |
| H | 5.276416  | 3.013402  | -0.294136 | C                  | 3.658519  | -1.245313 | 2.816069  |
| H | 6.695966  | 0.970996  | -0.487011 | O                  | 1.284007  | 3.247256  | -0.258851 |
| H | 5.759948  | 0.179003  | 0.778807  | N                  | 2.506363  | 1.774648  | 0.957875  |
| H | 4.698925  | 1.094613  | -1.945295 | C                  | 2.445571  | -0.621314 | 0.381668  |
| H | 4.983366  | -0.580531 | -1.476807 | H                  | 4.132382  | -1.476222 | 3.765818  |
| H | 3.851047  | 1.499330  | 1.962412  | C                  | 3.649194  | 2.678301  | 0.794202  |
| N | 2.237838  | -0.195630 | -1.439604 | C                  | 2.754598  | -1.955733 | 0.691773  |
| N | 1.458093  | 1.518746  | 0.660955  | H                  | 3.328037  | 3.701409  | 0.993247  |
| H | 5.961912  | 2.613677  | 1.278649  | H                  | 4.438219  | 2.394832  | 1.494241  |
| C | -1.615296 | 1.547039  | -1.165076 | H                  | 4.043423  | 2.637929  | -0.229177 |
| O | -1.215986 | 2.358393  | -2.002025 | H                  | 2.549051  | -2.733209 | -0.035329 |
| O | -2.164045 | 1.941912  | 0.022644  | C                  | 3.357163  | 0.084078  | 2.498904  |
| C | -3.077951 | 3.083218  | 0.074979  | H                  | 3.563306  | 0.879236  | 3.209950  |
| C | -3.777184 | 2.881220  | 1.420854  | I                  | 2.557773  | -0.174253 | -1.896309 |
| H | -3.044474 | 2.893718  | 2.235816  | Cu                 | 0.446529  | -0.512950 | -0.105786 |
| H | -4.507717 | 3.678741  | 1.597437  | C                  | 3.347251  | -2.266331 | 1.919037  |
| H | -4.285750 | 1.913171  | 1.428523  | H                  | 3.582013  | -3.300877 | 2.154041  |
| C | -4.088466 | 2.989677  | -1.075094 | C                  | 0.068335  | 1.409409  | 0.749202  |
| H | -3.605754 | 3.177507  | -2.037502 | C                  | -1.938441 | -2.400584 | 0.438426  |
| H | -4.527846 | 1.988433  | -1.086169 | C                  | -2.327004 | -1.313887 | -0.588826 |
| H | -4.880840 | 3.733284  | -0.932203 | C                  | -3.587025 | -1.715266 | -1.376200 |
| C | -2.306271 | 4.407375  | 0.038995  | C                  | -4.768922 | -2.027022 | -0.448839 |
| H | -1.746164 | 4.491296  | -0.893811 | C                  | -4.391302 | -3.129474 | 0.547956  |
| H | -3.008486 | 5.246457  | 0.113349  | C                  | -3.141844 | -2.731614 | 1.343747  |
| H | -1.609565 | 4.476357  | 0.881576  | H                  | -3.841347 | -0.909314 | -2.075335 |
| C | -1.251226 | -0.392752 | -2.713088 | H                  | -2.553223 | -0.408023 | -0.014866 |
| H | -0.687995 | 0.363758  | -3.258736 | H                  | -1.637240 | -3.307517 | -0.103972 |
| H | -0.710945 | -1.344927 | -2.758012 | H                  | -5.055346 | -1.122197 | 0.105693  |
| H | -2.205724 | -0.531438 | -3.242797 | H                  | -5.222116 | -3.334275 | 1.233907  |
| C | 0.720992  | 2.791484  | 0.780497  | H                  | -4.194934 | -4.064297 | 0.002650  |
| H | 0.468439  | 3.149663  | -0.219339 | H                  | -3.368856 | -1.838502 | 1.946793  |
| H | -0.214961 | 2.590746  | 1.299481  | H                  | -2.872565 | -3.527395 | 2.047332  |
| H | 1.287556  | 3.564222  | 1.318743  | H                  | -3.375468 | -2.607334 | -1.980217 |
| H | 1.559460  | 1.126178  | 1.598737  | N                  | -0.753902 | -1.957581 | 1.205542  |
|   |           |           |           | N                  | -1.168495 | -0.945854 | -1.440279 |

|                    |           |           |           |    |           |           |           |
|--------------------|-----------|-----------|-----------|----|-----------|-----------|-----------|
| H                  | -1.324166 | -0.000776 | -1.803308 | H  | 4.367282  | 1.672283  | -1.197756 |
| C                  | -0.868716 | -1.855636 | -2.557757 | H  | 1.913145  | -2.676365 | 1.203635  |
| H                  | -1.675032 | -1.912708 | -3.300492 | C  | 3.449873  | 0.694756  | 2.341435  |
| H                  | 0.037790  | -1.501661 | -3.051111 | H  | 3.854548  | 1.651322  | 2.660162  |
| H                  | -0.672867 | -2.861669 | -2.174596 | I  | 2.522997  | -1.218125 | -1.555434 |
| C                  | -0.086212 | -3.025666 | 1.959410  | Cu | 0.357540  | -0.344967 | -0.007845 |
| H                  | 0.353950  | -3.739214 | 1.255750  | C  | 2.879286  | -1.609917 | 2.817682  |
| H                  | 0.726907  | -2.588098 | 2.540484  | H  | 2.884881  | -2.467628 | 3.484592  |
| H                  | -0.756137 | -3.572761 | 2.638549  | C  | 0.332121  | 1.769984  | 0.262978  |
| H                  | -1.055728 | -1.241224 | 1.867031  | C  | -2.130579 | -1.893027 | 0.843025  |
| H                  | -5.642825 | -2.322537 | -1.041742 | C  | -2.357768 | -1.469180 | -0.625598 |
| C                  | -1.112652 | 1.843095  | -0.009802 | C  | -3.340826 | -2.419280 | -1.332092 |
| O                  | -1.176114 | 2.016376  | -1.226338 | C  | -4.673469 | -2.536225 | -0.580433 |
| O                  | -2.227378 | 1.972493  | 0.791709  | C  | -4.441979 | -2.988998 | 0.864816  |
| C                  | -3.416805 | 2.688040  | 0.331243  | C  | -3.476215 | -2.037097 | 1.581745  |
| C                  | -4.306002 | 2.688488  | 1.578118  | H  | -3.518974 | -2.073436 | -2.355522 |
| H                  | -3.795387 | 3.182909  | 2.410493  | H  | -2.778477 | -0.458292 | -0.609202 |
| H                  | -5.245272 | 3.215246  | 1.377830  | H  | -1.619635 | -2.869389 | 0.844267  |
| H                  | -4.540216 | 1.661309  | 1.880323  | H  | -5.175236 | -1.557508 | -0.579999 |
| C                  | -4.119682 | 1.958520  | -0.820493 | H  | -5.390742 | -3.043348 | 1.412115  |
| H                  | -3.479956 | 1.920333  | -1.701957 | H  | -4.019827 | -4.004816 | 0.864143  |
| H                  | -4.384994 | 0.939280  | -0.522695 | H  | -3.934296 | -1.039640 | 1.656596  |
| H                  | -5.047837 | 2.484435  | -1.073247 | H  | -3.301413 | -2.381190 | 2.607026  |
| C                  | -3.028232 | 4.118168  | -0.061209 | H  | -2.875066 | -3.414596 | -1.408678 |
| H                  | -2.374145 | 4.115459  | -0.934643 | N  | -1.209389 | -0.933460 | 1.479729  |
| H                  | -3.928581 | 4.700402  | -0.288801 | N  | -1.056348 | -1.344164 | -1.322402 |
| H                  | -2.501092 | 4.602349  | 0.767707  | C  | -0.774848 | -1.279395 | 2.836145  |
| C                  | -0.124665 | 1.251717  | 2.263783  | H  | -0.269674 | -2.249931 | 2.813663  |
| H                  | -1.052516 | 0.715098  | 2.484969  | H  | -0.047750 | -0.535888 | 3.167454  |
| H                  | 0.702593  | 0.696324  | 2.716075  | H  | -1.593799 | -1.326817 | 3.568142  |
| H                  | -0.199216 | 2.219280  | 2.781530  | H  | -1.655899 | -0.012856 | 1.481934  |
| <b>TS4-S-6.log</b> |           |           |           | H  | -5.340146 | -3.231726 | -1.104156 |
| C                  | 1.597007  | 2.148836  | -0.430509 | C  | -0.905100 | 2.045679  | -0.468732 |
| C                  | 2.867021  | 0.618872  | 1.071679  | O  | -1.060072 | 2.323069  | -1.648569 |
| C                  | 3.472886  | -0.406896 | 3.202199  | O  | -2.030114 | 1.864506  | 0.364413  |
| O                  | 1.705598  | 2.803665  | -1.458457 | C  | -3.259934 | 2.607996  | 0.116332  |
| N                  | 2.798965  | 1.749433  | 0.233739  | C  | -4.073650 | 2.359188  | 1.390004  |
| C                  | 2.298589  | -0.619665 | 0.684877  | H  | -3.532704 | 2.724877  | 2.269015  |
| H                  | 3.941165  | -0.316104 | 4.178071  | H  | -5.040452 | 2.871342  | 1.334908  |
| C                  | 4.054790  | 2.256682  | -0.322419 | H  | -4.261094 | 1.287168  | 1.522098  |
| C                  | 2.313860  | -1.728457 | 1.545968  | C  | -4.011237 | 2.071835  | -1.110242 |
| H                  | 3.912138  | 3.291024  | -0.635790 | H  | -3.404756 | 2.188070  | -2.008298 |
| H                  | 4.836316  | 2.204478  | 0.440240  | H  | -4.257768 | 1.011706  | -0.980175 |
|                    |           |           |           | H  | -4.953205 | 2.618948  | -1.236181 |

|   |           |           |           |   |           |           |           |
|---|-----------|-----------|-----------|---|-----------|-----------|-----------|
| C | -2.944112 | 4.101636  | -0.034263 | H | -4.984775 | -1.621957 | 0.531411  |
| H | -2.363749 | 4.287286  | -0.939900 | H | -4.808310 | -3.966462 | 1.403233  |
| H | -3.874877 | 4.677604  | -0.086423 | H | -3.805720 | -4.411487 | 0.023482  |
| H | -2.368646 | 4.451297  | 0.830032  | H | -3.136425 | -2.317010 | 2.151049  |
| C | 0.311147  | 2.085695  | 1.767412  | H | -2.388561 | -3.908473 | 2.040364  |
| H | -0.677918 | 1.910230  | 2.189346  | H | -3.370702 | -2.714784 | -1.827615 |
| H | 1.025360  | 1.486946  | 2.335901  | N | -0.545834 | -1.996306 | 1.200411  |
| H | 0.561444  | 3.140921  | 1.953275  | N | -1.293360 | -0.925664 | -1.346333 |
| C | -1.138094 | -0.707869 | -2.656136 | H | -1.529699 | 0.024383  | -1.648023 |
| H | -0.126187 | -0.618109 | -3.054655 | C | -1.006150 | -1.738250 | -2.534578 |
| H | -1.752356 | -1.277387 | -3.365380 | H | -1.866458 | -1.849099 | -3.208157 |
| H | -1.535230 | 0.301004  | -2.541647 | H | -0.198474 | -1.253138 | -3.085618 |
| H | -0.662407 | -2.280319 | -1.439165 | H | -0.658243 | -2.734119 | -2.242201 |

**TS4-S-7.log**

|    |           |           |           |
|----|-----------|-----------|-----------|
| C  | 1.362200  | 2.226298  | -0.218863 |
| C  | 2.821005  | 0.684459  | 1.087394  |
| C  | 3.555866  | -0.446286 | 3.124342  |
| O  | 1.369702  | 3.003605  | -1.165318 |
| N  | 2.613206  | 1.877789  | 0.364751  |
| C  | 2.467610  | -0.577800 | 0.556848  |
| H  | 3.981019  | -0.384439 | 4.121794  |
| C  | 3.796192  | 2.571916  | -0.147564 |
| C  | 2.681054  | -1.755870 | 1.292084  |
| H  | 3.545450  | 3.618717  | -0.321960 |
| H  | 4.602361  | 2.500319  | 0.587477  |
| H  | 4.136226  | 2.139178  | -1.097524 |
| H  | 2.467663  | -2.716468 | 0.835051  |
| C  | 3.358193  | 0.718998  | 2.380758  |
| H  | 3.593468  | 1.691583  | 2.803789  |
| I  | 2.533229  | -0.843039 | -1.694668 |
| Cu | 0.343859  | -0.387131 | -0.003298 |
| C  | 3.199380  | -1.684925 | 2.585547  |
| H  | 3.356975  | -2.599096 | 3.151518  |
| C  | 0.149769  | 1.674604  | 0.465221  |
| C  | -1.752977 | -2.521532 | 0.499283  |
| C  | -2.337397 | -1.426850 | -0.425324 |
| C  | -3.619916 | -1.905148 | -1.129549 |
| C  | -4.664674 | -2.432418 | -0.139771 |
| C  | -4.071209 | -3.577957 | 0.690151  |
| C  | -2.824760 | -3.096244 | 1.444205  |
| H  | -4.023299 | -1.080430 | -1.729175 |
| H  | -2.589059 | -0.569811 | 0.211228  |
| H  | -1.389876 | -3.334629 | -0.142809 |

|   |           |           |           |
|---|-----------|-----------|-----------|
| H | -4.984775 | -1.621957 | 0.531411  |
| H | -4.808310 | -3.966462 | 1.403233  |
| H | -3.805720 | -4.411487 | 0.023482  |
| H | -3.136425 | -2.317010 | 2.151049  |
| H | -2.388561 | -3.908473 | 2.040364  |
| H | -3.370702 | -2.714784 | -1.827615 |
| N | -0.545834 | -1.996306 | 1.200411  |
| N | -1.293360 | -0.925664 | -1.346333 |
| H | -1.529699 | 0.024383  | -1.648023 |
| C | -1.006150 | -1.738250 | -2.534578 |
| H | -1.866458 | -1.849099 | -3.208157 |
| H | -0.198474 | -1.253138 | -3.085618 |
| H | -0.658243 | -2.734119 | -2.242201 |
| H | -5.558812 | -2.767254 | -0.679096 |
| C | -1.101720 | 1.989801  | -0.242667 |
| O | -1.300474 | 1.935953  | -1.458056 |
| O | -2.120664 | 2.293323  | 0.630779  |
| C | -3.405232 | 2.810609  | 0.170178  |
| C | -4.131729 | 3.109825  | 1.485355  |
| H | -3.567798 | 3.840331  | 2.073919  |
| H | -5.131046 | 3.512934  | 1.287834  |
| H | -4.234983 | 2.195956  | 2.081053  |
| C | -4.179542 | 1.758112  | -0.633866 |
| H | -3.649582 | 1.509200  | -1.553739 |
| H | -4.318256 | 0.848771  | -0.038408 |
| H | -5.172467 | 2.145815  | -0.889758 |
| C | -3.195680 | 4.098504  | -0.635035 |
| H | -2.674340 | 3.892174  | -1.570438 |
| H | -4.165101 | 4.560205  | -0.856024 |
| H | -2.599571 | 4.808215  | -0.051427 |
| C | 0.127643  | 1.963639  | 1.975844  |
| H | -0.787468 | 1.587354  | 2.433108  |
| H | 0.969212  | 1.500256  | 2.493400  |
| H | 0.167967  | 3.043711  | 2.180821  |
| H | 0.125788  | -2.750470 | 1.313790  |
| C | -0.757971 | -1.366303 | 2.516992  |
| H | -1.136317 | -2.057724 | 3.282014  |
| H | 0.197718  | -0.955030 | 2.848403  |
| H | -1.457872 | -0.536234 | 2.407276  |

**TS4-S-8.log**

|   |          |           |           |
|---|----------|-----------|-----------|
| C | 1.626161 | 2.119400  | -0.454707 |
| C | 2.903100 | 0.589752  | 1.040126  |
| C | 3.558860 | -0.413933 | 3.167822  |



|    |           |           |           |                |           |           |           |
|----|-----------|-----------|-----------|----------------|-----------|-----------|-----------|
| O  | 1.722997  | 2.733736  | -1.507999 | H              | -3.373327 | 2.418982  | -1.948206 |
| N  | 2.835148  | 1.713235  | 0.191160  | H              | -4.068942 | 1.049523  | -1.053984 |
| C  | 2.332746  | -0.651289 | 0.672073  | H              | -4.946203 | 2.586155  | -1.127048 |
| H  | 4.040839  | -0.311909 | 4.135760  | C              | -3.016514 | 4.135450  | 0.184594  |
| C  | 4.088006  | 2.168977  | -0.414643 | H              | -2.415565 | 4.416766  | -0.682328 |
| C  | 2.394478  | -1.759261 | 1.533650  | H              | -3.976565 | 4.661807  | 0.135027  |
| H  | 3.959317  | 3.193426  | -0.764279 | H              | -2.494113 | 4.453113  | 1.093731  |
| H  | 4.885852  | 2.129071  | 0.331914  | C              | 0.435766  | 2.186636  | 1.781508  |
| H  | 4.368563  | 1.545417  | -1.273843 | H              | -0.560535 | 2.181349  | 2.220825  |
| H  | 2.013796  | -2.717823 | 1.196738  | H              | 1.065952  | 1.521471  | 2.377054  |
| C  | 3.504591  | 0.680248  | 2.301763  | H              | 0.847040  | 3.200116  | 1.898300  |
| H  | 3.904343  | 1.644175  | 2.603869  | C              | -1.312716 | -0.397053 | -2.589538 |
| I  | 2.431003  | -1.243587 | -1.573366 | H              | -0.324137 | -0.177551 | -2.998589 |
| Cu | 0.326541  | -0.305864 | 0.040329  | H              | -1.900725 | -0.944054 | -3.338093 |
| C  | 2.983991  | -1.630496 | 2.792264  | H              | -1.790903 | 0.555070  | -2.367981 |
| H  | 3.026943  | -2.490123 | 3.455661  | H              | -0.724938 | -2.064009 | -1.579942 |
| C  | 0.374121  | 1.789597  | 0.293158  | H              | -0.257122 | -2.287840 | 1.847911  |
| C  | -1.959822 | -2.241659 | 0.695168  | C              | -1.267423 | -0.654475 | 2.528020  |
| C  | -2.351472 | -1.394568 | -0.536645 | H              | -1.843229 | -1.139068 | 3.328037  |
| C  | -3.485764 | -2.063731 | -1.333562 | H              | -0.358170 | -0.229938 | 2.956004  |
| C  | -4.694590 | -2.414288 | -0.457455 | H              | -1.846551 | 0.164293  | 2.099173  |
| C  | -4.273648 | -3.305824 | 0.715854  |                |           |           |           |
| C  | -3.188524 | -2.608501 | 1.546487  |                |           |           |           |
| H  | -3.795321 | -1.406483 | -2.153148 | <b>Cat.log</b> |           |           |           |
| H  | -2.677214 | -0.409174 | -0.185766 | I              | -3.140850 | -0.056405 | -0.012762 |
| H  | -1.525292 | -3.177015 | 0.309324  | Cu             | -0.690797 | 0.204493  | 0.037936  |
| H  | -5.143341 | -1.488589 | -0.068175 | C              | 2.194091  | 0.723228  | -0.176777 |
| H  | -5.134495 | -3.544290 | 1.351943  | C              | 2.103593  | -0.783212 | 0.163247  |
| H  | -3.890557 | -4.262020 | 0.330060  | C              | 3.344063  | -1.537538 | -0.349302 |
| H  | -3.615826 | -1.694055 | 1.977589  | C              | 4.653064  | -0.928276 | 0.171370  |
| H  | -2.872684 | -3.238841 | 2.387936  | C              | 4.740218  | 0.560036  | -0.188766 |
| H  | -3.092346 | -2.982731 | -1.796355 | C              | 3.515313  | 1.323091  | 0.335800  |
| N  | -0.863294 | -1.576116 | 1.449188  | H              | 3.274329  | -2.593944 | -0.066821 |
| N  | -1.129863 | -1.157484 | -1.336473 | H              | 2.058946  | -0.871487 | 1.258897  |
| H  | -5.465098 | -2.906599 | -1.062677 | H              | 2.154757  | 0.820825  | -1.271469 |
| C  | -0.879050 | 2.155943  | -0.391569 | H              | 4.698245  | -1.042220 | 1.264131  |
| O  | -1.043882 | 2.541718  | -1.536825 | H              | 5.657425  | 1.003251  | 0.216461  |
| O  | -1.982130 | 1.933718  | 0.444214  | H              | 4.794350  | 0.668210  | -1.281648 |
| C  | -3.247340 | 2.619624  | 0.214640  | H              | 3.508615  | 1.285320  | 1.436344  |
| C  | -4.072335 | 2.223549  | 1.444043  | H              | 3.579144  | 2.380593  | 0.056151  |
| H  | -3.566459 | 2.537858  | 2.362953  | H              | 3.339355  | -1.502613 | -1.449888 |
| H  | -5.061970 | 2.691981  | 1.410670  | N              | 0.993023  | 1.426690  | 0.339001  |
| H  | -4.207350 | 1.135860  | 1.480598  | N              | 0.829343  | -1.325909 | -0.343004 |
| C  | -3.947016 | 2.138409  | -1.065389 | C              | 0.762466  | 2.762103  | -0.250160 |
|    |           |           |           | H              | 0.568305  | 2.642663  | -1.319280 |





|                |           |           |           |               |           |           |           |
|----------------|-----------|-----------|-----------|---------------|-----------|-----------|-----------|
| H              | -4.805403 | -0.491736 | -0.641353 | H             | 4.834623  | -2.850016 | 0.942650  |
| N              | -1.381183 | 1.123295  | 0.945426  | H             | 3.708541  | -4.147520 | 0.477670  |
| N              | -2.088436 | -0.662651 | -1.114114 | H             | 5.247995  | -3.956300 | -0.386607 |
| C              | -1.177593 | 1.139671  | 2.400308  | C             | 3.167332  | -3.266665 | -2.081334 |
| H              | -1.459233 | 0.163942  | 2.805354  | H             | 2.649501  | -2.592290 | -2.771886 |
| H              | -0.115442 | 1.297904  | 2.595737  | H             | 3.961932  | -3.782416 | -2.630046 |
| H              | -1.747007 | 1.925189  | 2.918767  | H             | 2.450935  | -4.013217 | -1.722303 |
| H              | -0.958224 | 1.960112  | 0.546792  | C             | 1.243091  | -0.638158 | 1.215764  |
| H              | -6.292540 | 1.407832  | -1.274615 | C             | 0.506164  | -1.931330 | 1.609267  |
| C              | -2.034231 | -1.263221 | -2.464108 | H             | -0.499862 | -1.744785 | 1.974796  |
| H              | -1.507698 | -2.216463 | -2.370009 | H             | 0.482929  | -2.630138 | 0.774182  |
| H              | -3.029113 | -1.450785 | -2.883922 | H             | 1.070190  | -2.392774 | 2.430473  |
| H              | -1.461388 | -0.636056 | -3.146492 | C             | -2.887905 | -1.336034 | -0.529389 |
| H              | -2.467851 | -1.381551 | -0.492519 | C             | -3.031984 | -1.023041 | 0.980450  |
| <b>TS5.log</b> |           |           |           | C             | -4.517880 | -0.827546 | 1.339748  |
| C              | 2.641613  | -1.051526 | 0.756213  | C             | -5.372455 | -2.041356 | 0.950851  |
| C              | 1.312530  | 0.329482  | 2.389939  | C             | -5.221097 | -2.360632 | -0.540571 |
| C              | 1.958464  | 1.816566  | 0.670425  | C             | -3.743852 | -2.558036 | -0.908021 |
| C              | 3.112162  | 2.864444  | -1.166358 | H             | -4.620274 | -0.628414 | 2.411959  |
| O              | 1.031566  | -0.000012 | 3.535813  | H             | -2.645358 | -1.884442 | 1.546783  |
| N              | 1.683297  | 1.606743  | 2.028133  | H             | -3.235190 | -0.456732 | -1.085155 |
| C              | 1.406234  | 0.887864  | -0.226505 | H             | -5.057201 | -2.912641 | 1.543831  |
| H              | 3.753827  | 3.656156  | -1.541782 | H             | -5.796987 | -3.255430 | -0.805915 |
| C              | 1.939932  | 2.617708  | 3.040276  | H             | -5.631612 | -1.531568 | -1.134082 |
| C              | 1.829935  | 0.848946  | -1.554280 | H             | -3.350319 | -3.441943 | -0.380442 |
| H              | 1.473309  | 3.562546  | 2.746124  | H             | -3.649989 | -2.761457 | -1.980274 |
| H              | 1.510090  | 2.263873  | 3.977277  | H             | -4.884104 | 0.065725  | 0.812753  |
| H              | 3.017347  | 2.771444  | 3.176465  | N             | -1.455228 | -1.492037 | -0.878586 |
| H              | 1.450764  | 0.085706  | -2.223799 | N             | -2.185815 | 0.137640  | 1.336599  |
| C              | 2.786830  | 2.834495  | 0.190544  | C             | -1.169978 | -1.530290 | -2.325397 |
| H              | 3.202078  | 3.570618  | 0.870732  | H             | -1.431635 | -0.559564 | -2.753353 |
| I              | -1.660573 | 2.238094  | -1.353182 | H             | -0.095204 | -1.688636 | -2.454211 |
| Cu             | -0.370817 | 0.187542  | 0.050721  | H             | -1.707287 | -2.325115 | -2.860041 |
| O              | 3.663363  | -0.721194 | 1.321762  | H             | -1.124036 | -2.361003 | -0.461734 |
| C              | 2.656711  | 1.866399  | -2.033818 | H             | -6.423504 | -1.854508 | 1.201439  |
| H              | 2.921778  | 1.892789  | -3.086745 | C             | -2.062867 | 0.414325  | 2.778372  |
| O              | 2.556223  | -1.883804 | -0.296539 | H             | -1.459779 | 1.316934  | 2.899070  |
| C              | 3.758974  | -2.480914 | -0.910254 | H             | -3.029703 | 0.569186  | 3.274496  |
| C              | 4.703317  | -1.383931 | -1.408485 | H             | -1.532635 | -0.400279 | 3.276070  |
| H              | 5.131568  | -0.826040 | -0.575232 | H             | -2.586205 | 0.964714  | 0.885694  |
| H              | 5.514207  | -1.841769 | -1.986089 | <b>2d.log</b> |           |           |           |
| H              | 4.166437  | -0.683813 | -2.054875 | C             | -0.987679 | -0.789796 | -0.099358 |
| C              | 4.430041  | -3.414256 | 0.100649  | C             | 1.407517  | -1.741372 | 0.233737  |

|   |           |           |           |
|---|-----------|-----------|-----------|
| C | 2.310372  | 0.433222  | -0.166195 |
| C | 2.692056  | 2.811788  | -0.328860 |
| O | 1.350044  | -2.987623 | 0.261263  |
| N | 2.530620  | -0.973407 | -0.289962 |
| C | 1.046052  | 0.672515  | 0.441566  |
| H | 3.327474  | 3.657765  | -0.624566 |
| C | 3.734175  | -1.610344 | -0.881055 |
| C | 0.602675  | 1.982574  | 0.652119  |
| H | 4.646492  | -1.335866 | -0.317192 |
| H | 3.575917  | -2.702320 | -0.820279 |
| H | 3.861312  | -1.313018 | -1.939814 |
| H | -0.384566 | 2.160092  | 1.100668  |
| C | 3.150357  | 1.495507  | -0.556740 |
| H | 4.124083  | 1.303721  | -1.022921 |
| O | -1.185067 | -1.550808 | -1.071005 |
| C | 1.437028  | 3.058729  | 0.264116  |
| H | 1.103771  | 4.091923  | 0.424049  |
| O | -1.899349 | 0.157599  | 0.444581  |
| C | -3.209538 | 0.248643  | -0.280377 |
| C | -2.992749 | 0.693611  | -1.768557 |
| H | -2.476184 | -0.100709 | -2.326297 |
| H | -3.968018 | 0.890932  | -2.237565 |
| H | -2.387208 | 1.611740  | -1.801199 |
| C | -3.988198 | -1.110219 | -0.202354 |
| H | -3.446202 | -1.883315 | -0.765911 |
| H | -4.087089 | -1.427781 | 0.846369  |
| H | -4.992184 | -0.982460 | -0.633537 |
| C | -3.970856 | 1.362325  | 0.515048  |
| H | -3.402593 | 2.303998  | 0.481348  |
| H | -4.964000 | 1.527955  | 0.071690  |
| H | -4.093974 | 1.058498  | 1.565372  |
| C | 0.352919  | -0.666203 | 0.749011  |
| C | 0.049179  | -0.877220 | 2.269981  |
| H | 0.963006  | -0.726463 | 2.865008  |
| H | -0.716530 | -0.156606 | 2.595117  |
| H | -0.322715 | -1.900138 | 2.438195  |

## VI References

1. Gaussian 09, Revision D.01, Frisch, M. J.; Trucks, G. W.; Schlegel, H. B.; Scuseria, G. E.; Robb, M. A.; Cheeseman, J. R.; Scalmani, G.; Barone, V.; Mennucci, B.; Petersson, G. A.; Nakatsuji, H.; Caricato, M.; Li, X.; Hratchian, H. P.; Izmaylov, A. F.; Bloino, J.; Zheng, G.; Sonnenberg, J. L.; Hada, M.; Ehara, M.; Toyota, K.; Fukuda, R.; Hasegawa, J.; Ishida, M.; Nakajima, T.; Honda, Y.; Kitao, O.; Nakai, H.; Vreven, T.; Montgomery, J. A.; Jr. Peralta, J. E.; Ogliaro, F.; Bearpark, M.; Heyd, J. J.; Brothers, E.; Kudin, K. N.; Staroverov, V. N.; Keith, T.; Kobayashi, R.; Normand, J.; Raghavachari, K.; Rendell, A.; Burant, J. C.; Iyengar, S. S.; Tomasi, J.; Cossi, M.; Rega, N.; Millam, J. M.; Klene, M.; Knox, J. E.; Cross, J. B.; Bakken, V.; Adamo, C.; Jaramillo, J.; Gomperts, R.; Stratmann, R. E.; Yazyev, O.; Austin, A. J.; Cammi, R.; Pomelli, C.; Ochterski, J. W.; Martin, R. L.; Morokuma, K.; Zakrzewski, V. G.; Voth, G. A.; Salvador, P.; Dannenberg, J. J.; Dapprich, S.; Daniels, A. D.; Farkas, O.; Foresman, J. B.; Ortiz, J. V.; Cioslowski, J.; and Fox, D. J. Gaussian, Inc., Wallingford CT, 2013.
2. Becke, A. D. *J. Chem. Phys.* **1993**, *98*, 5648-5652.
3. Hariharan, P. C.; Pople, J. A. *Theor. Chim. Acta* **1973**, *28*, 213-222.
4. Francl, M. M.; Pietro, W. J.; Hehre, W. J.; Binkley, J. S.; Gordon, M. S.; DeFrees, D. J.; Pople, J. A. *J. Chem. Phys.* **1982**, *77*, 3654-3665.
5. Dolg, M.; Wedig, U.; Stoll, H.; Preuss, H. *J. Chem. Phys.* **1987**, *86*, 866-872.
6. Andrae, D.; Häußermann, U.; Dolg, M.; Stoll, H.; Preuß, H. *Theor. Chem. Acc.* **1990**, *77*, 123-141.
7. Weigend, F.; Ahlrichs, R. *Phys. Chem. Chem. Phys.* **2005**, *7*, 3297-3305.
8. Marenich, A. V.; Cramer, C. J.; Truhlar, D. G. *J. Phys. Chem. B.* **2009**, *113*, 6378-6396.
9. Legault, C. Y. CYLview, 1.0b, Universite de Sherbrooke, 2009, <http://www.cylview.org>.

## VII. NMR and HPLC Spectra

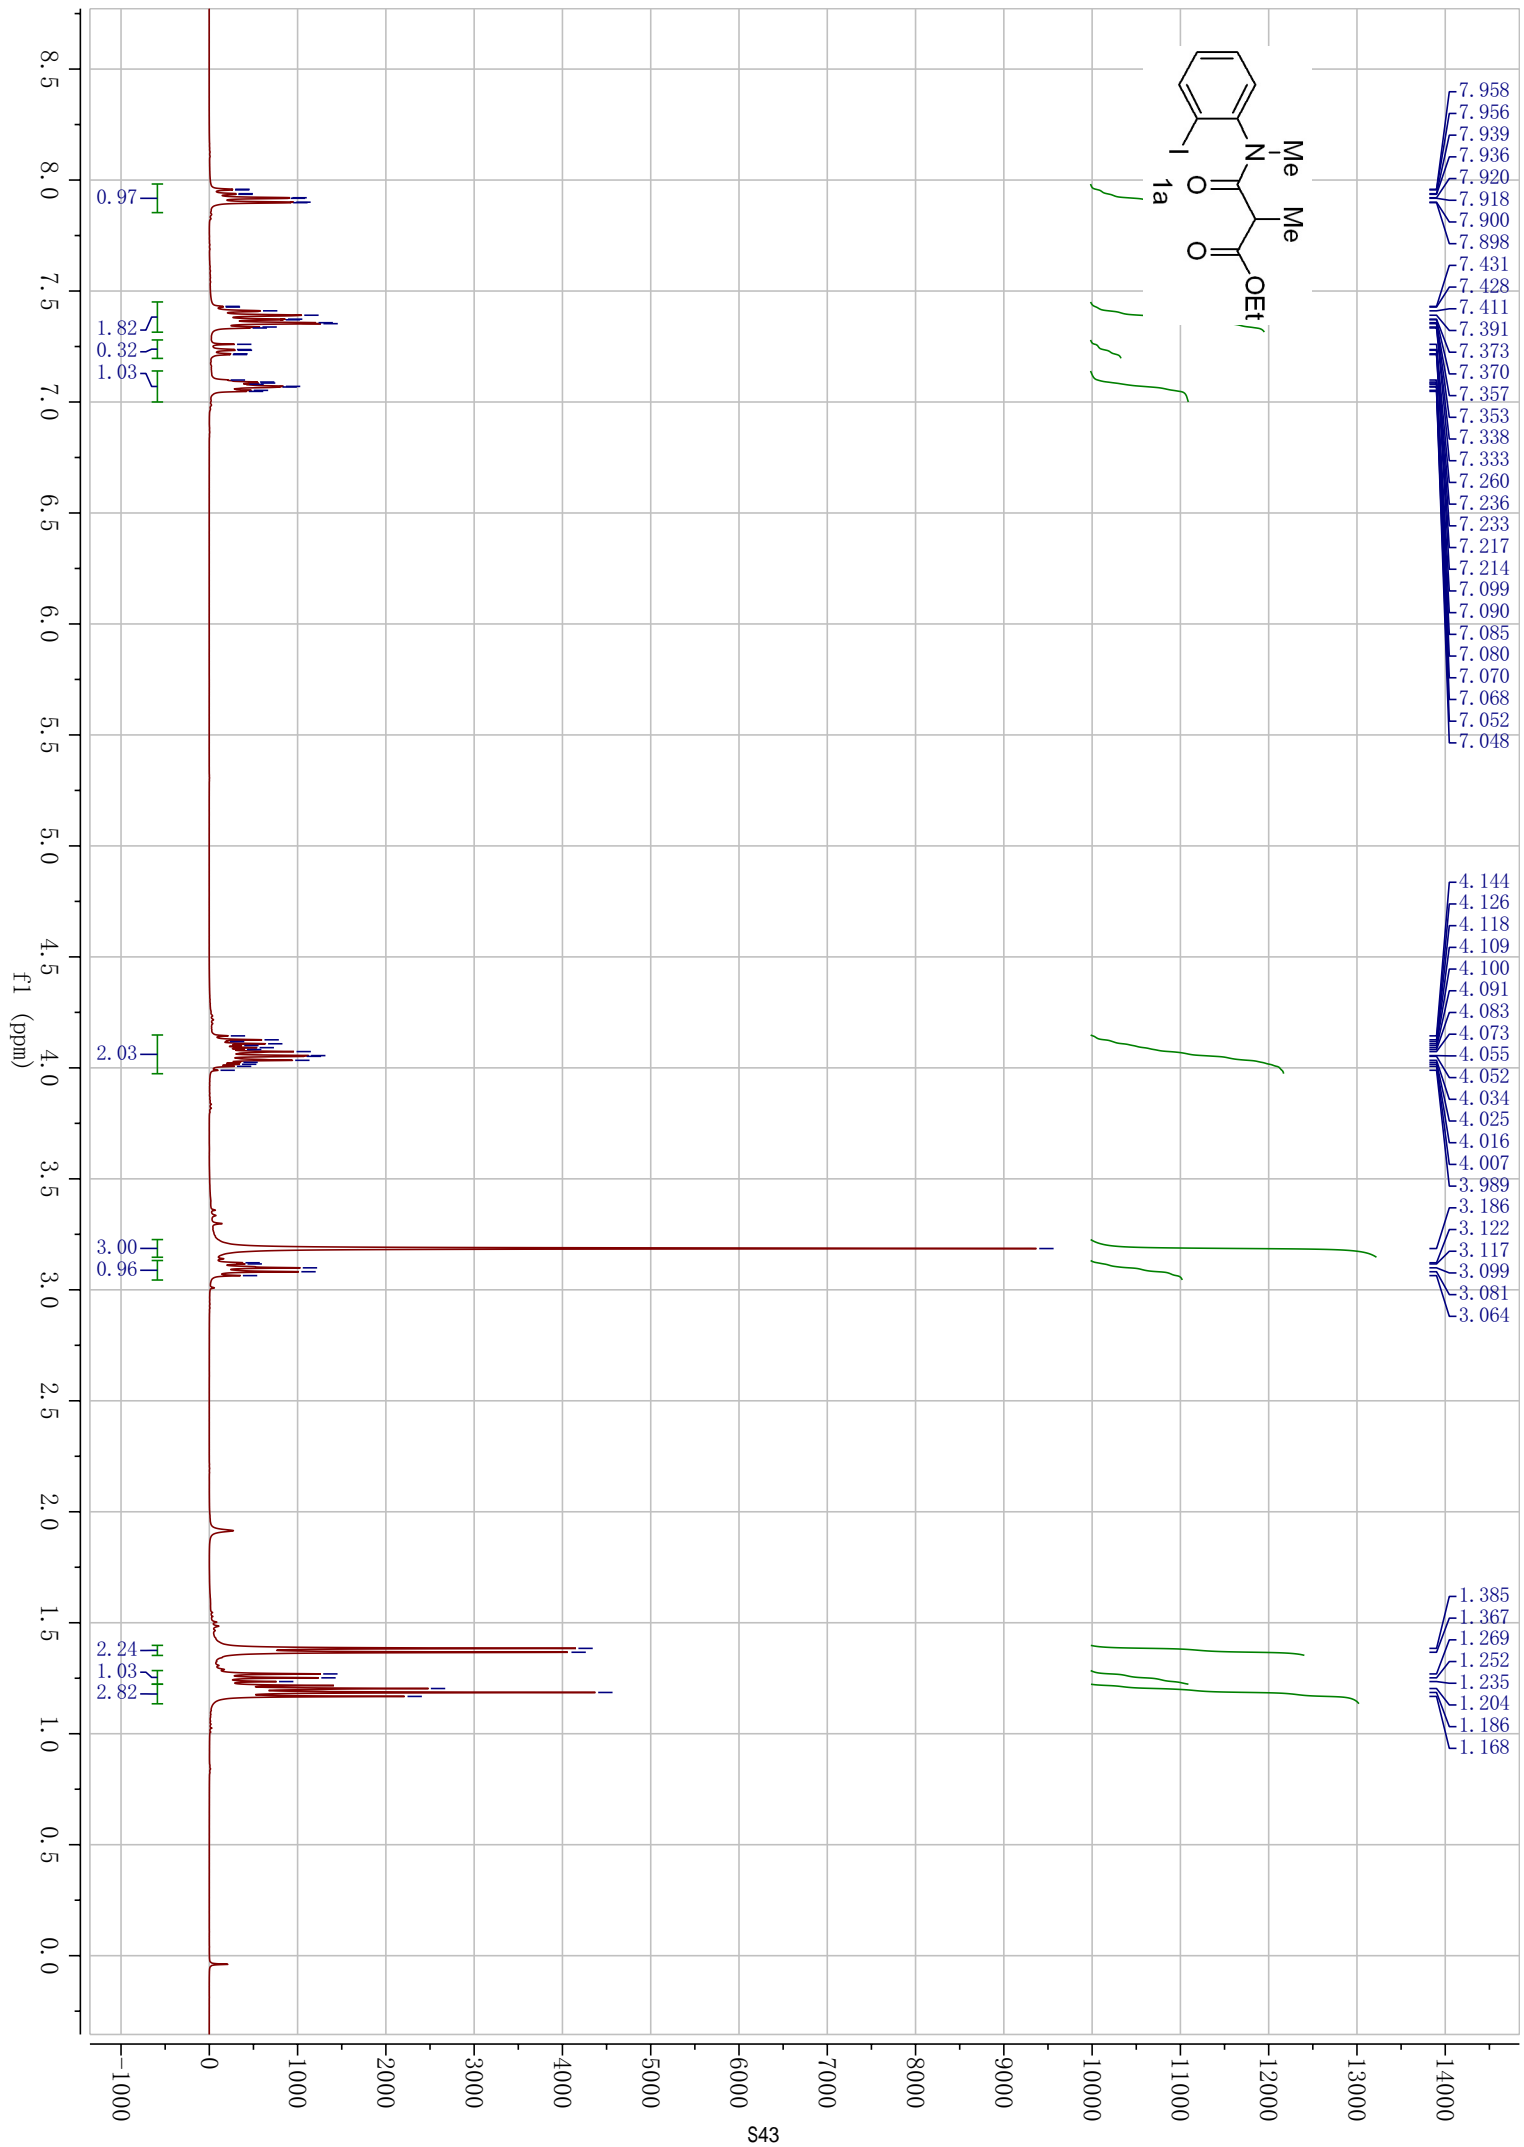

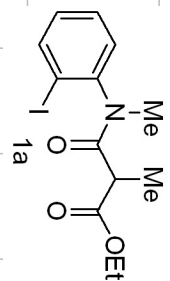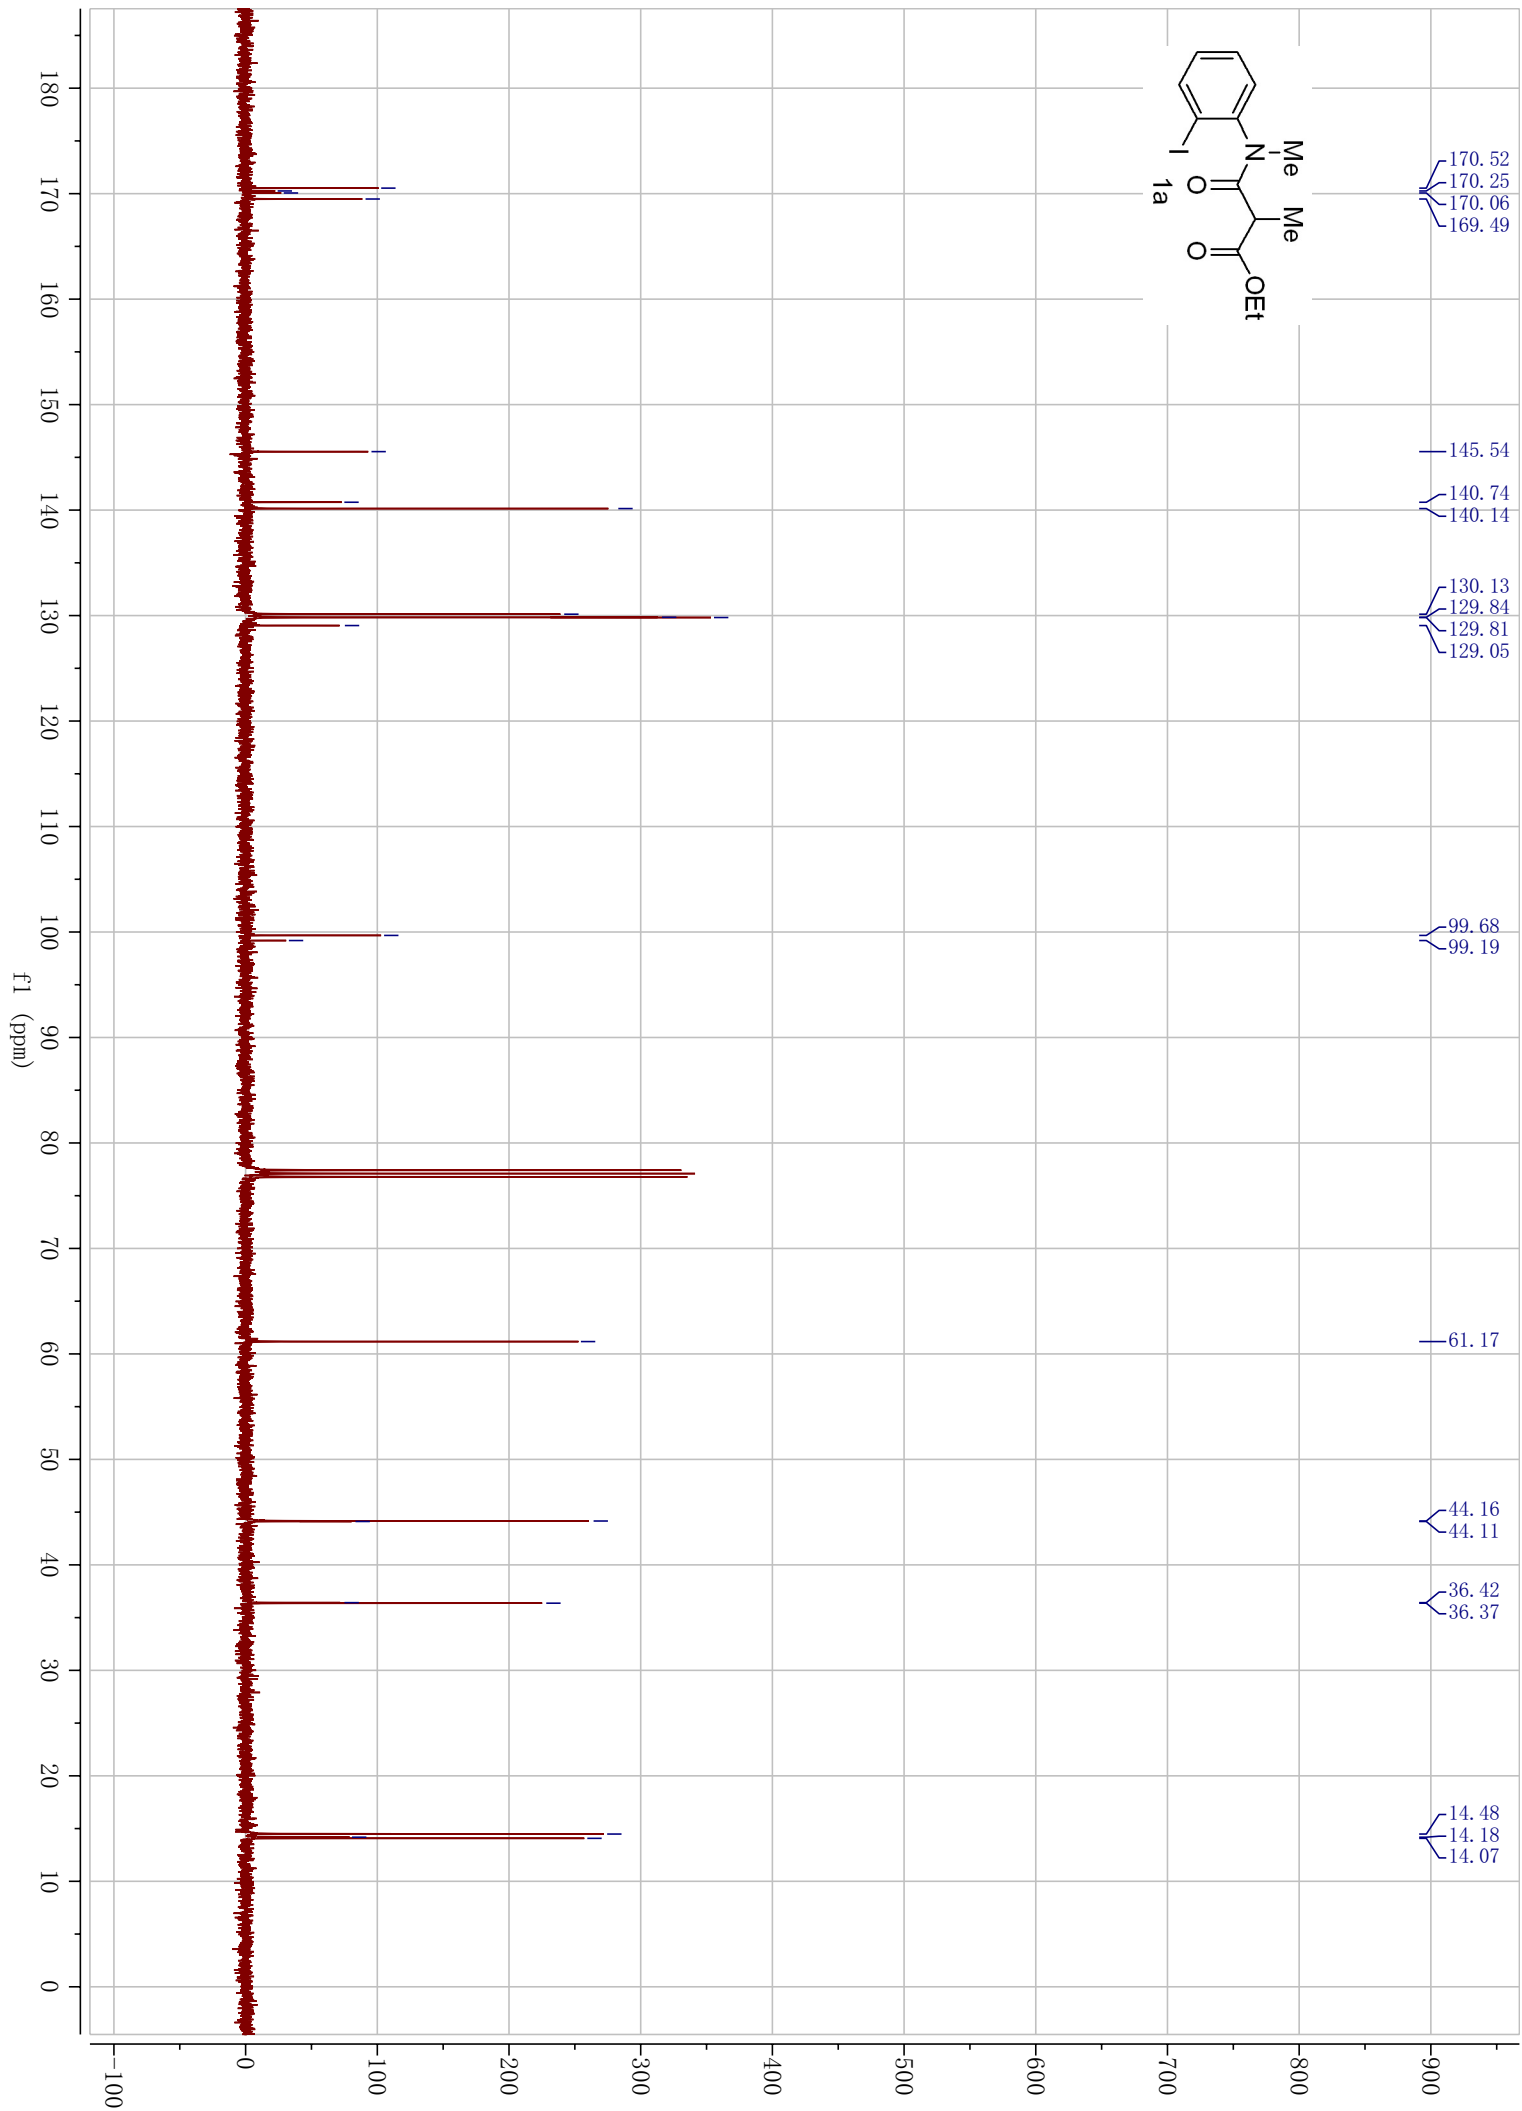



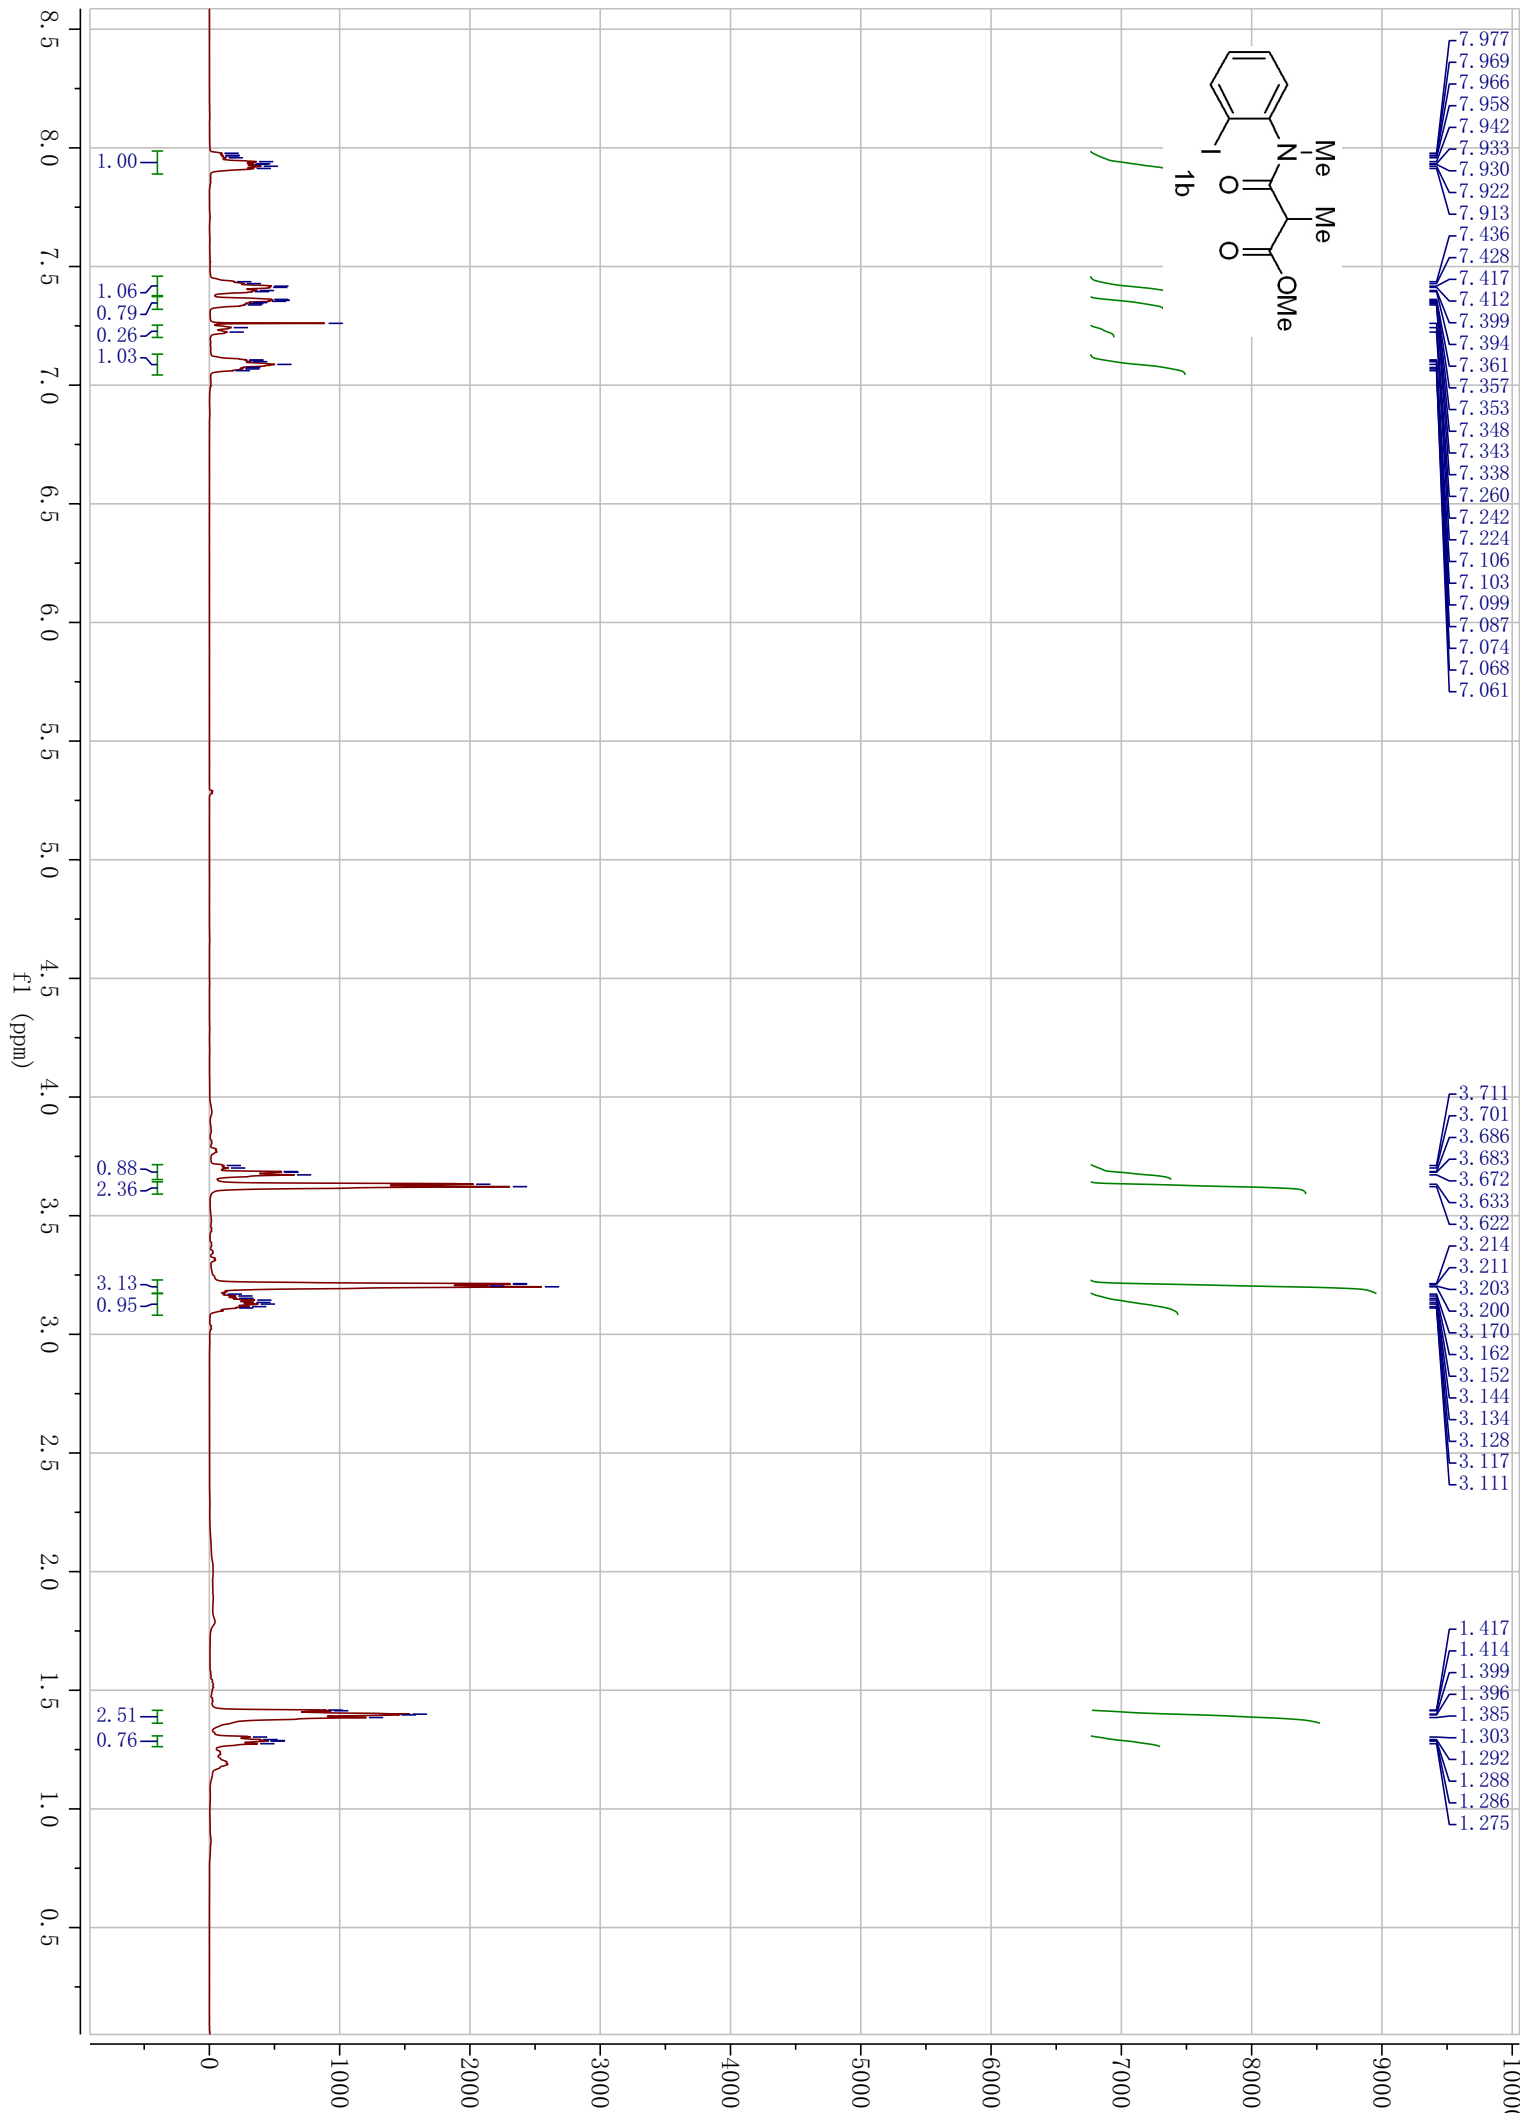

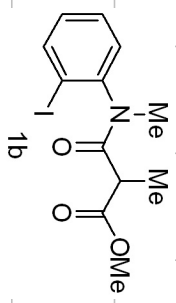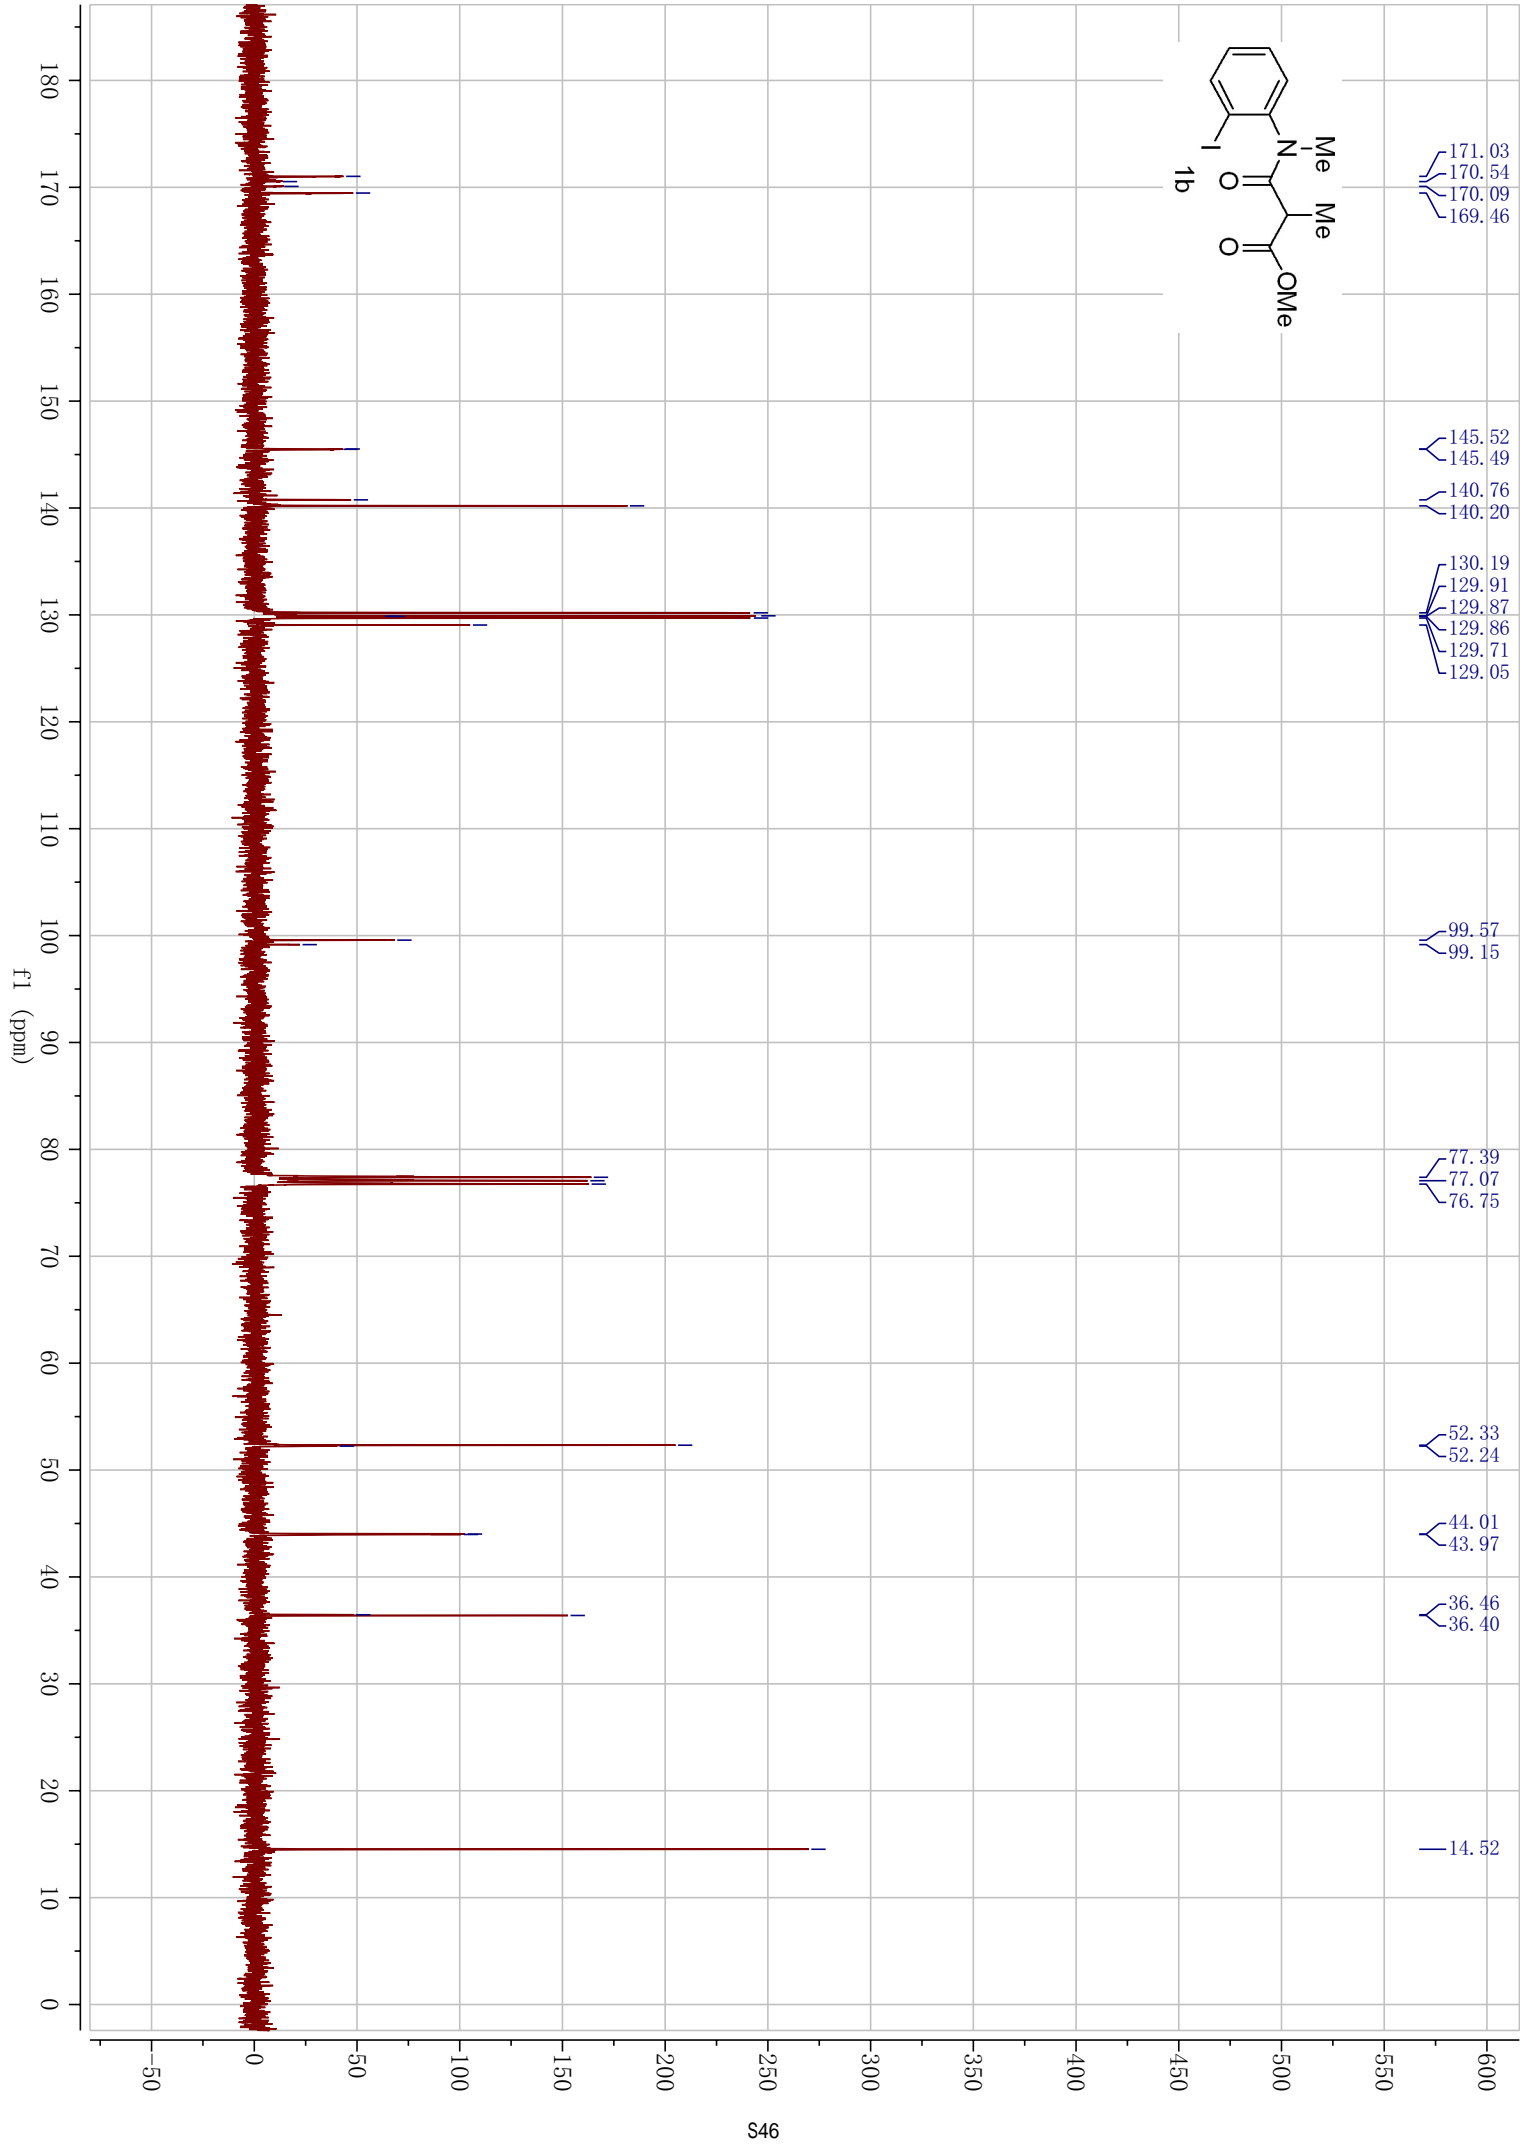

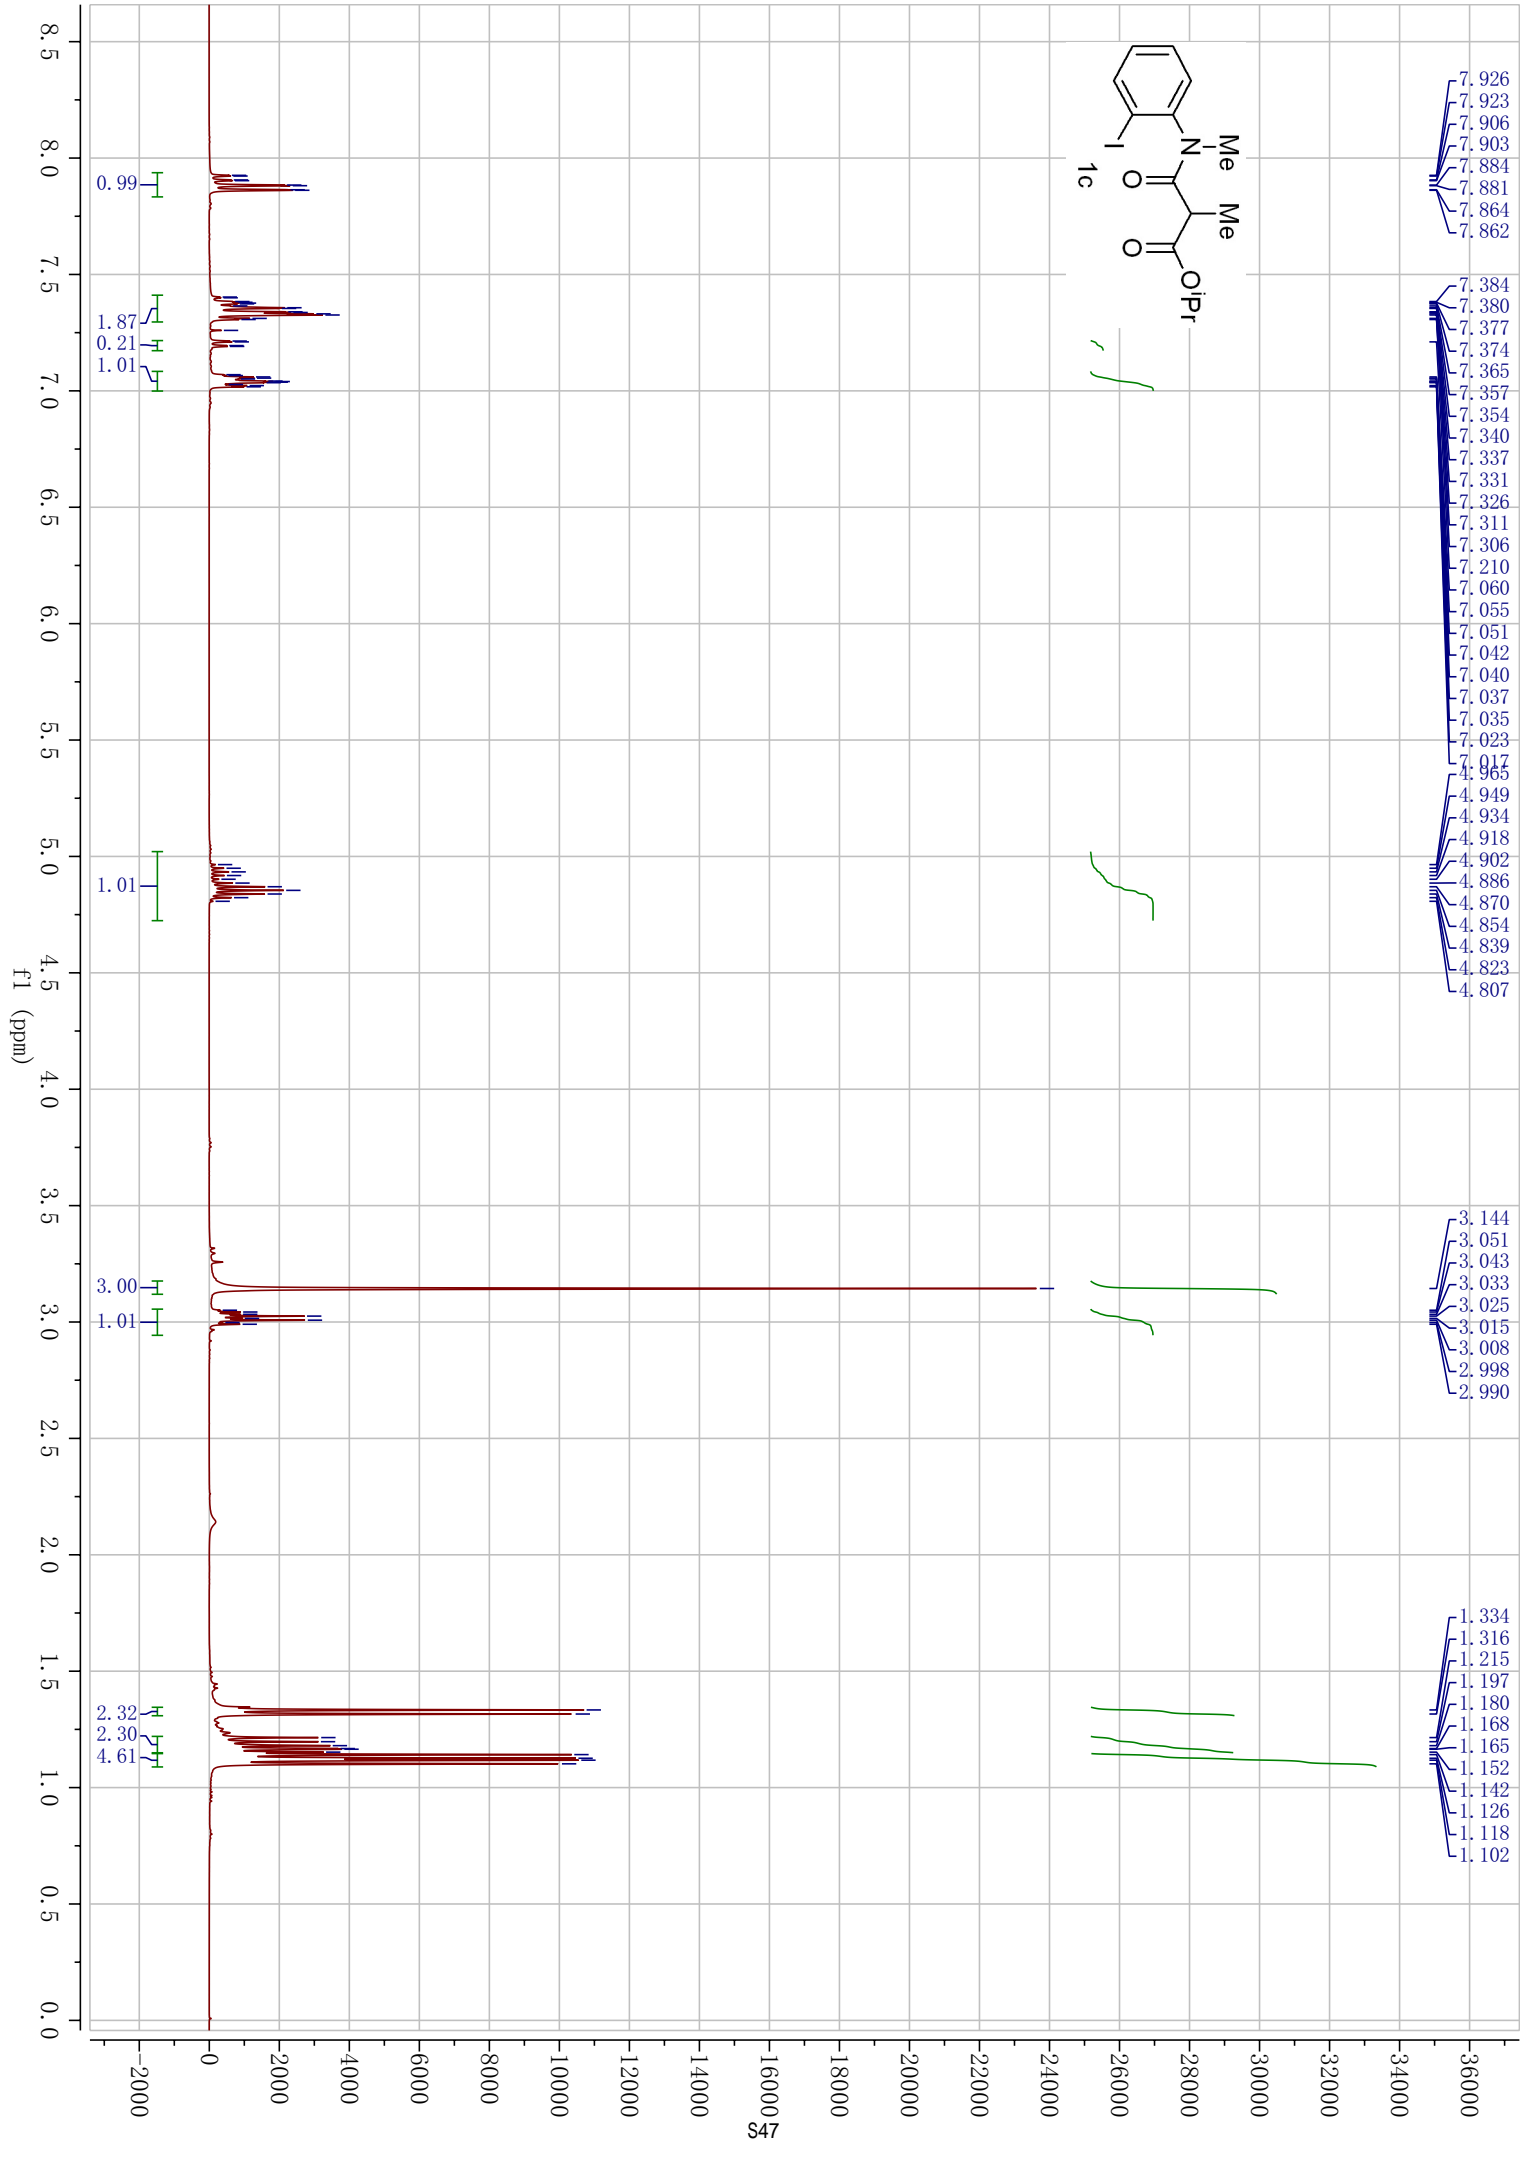

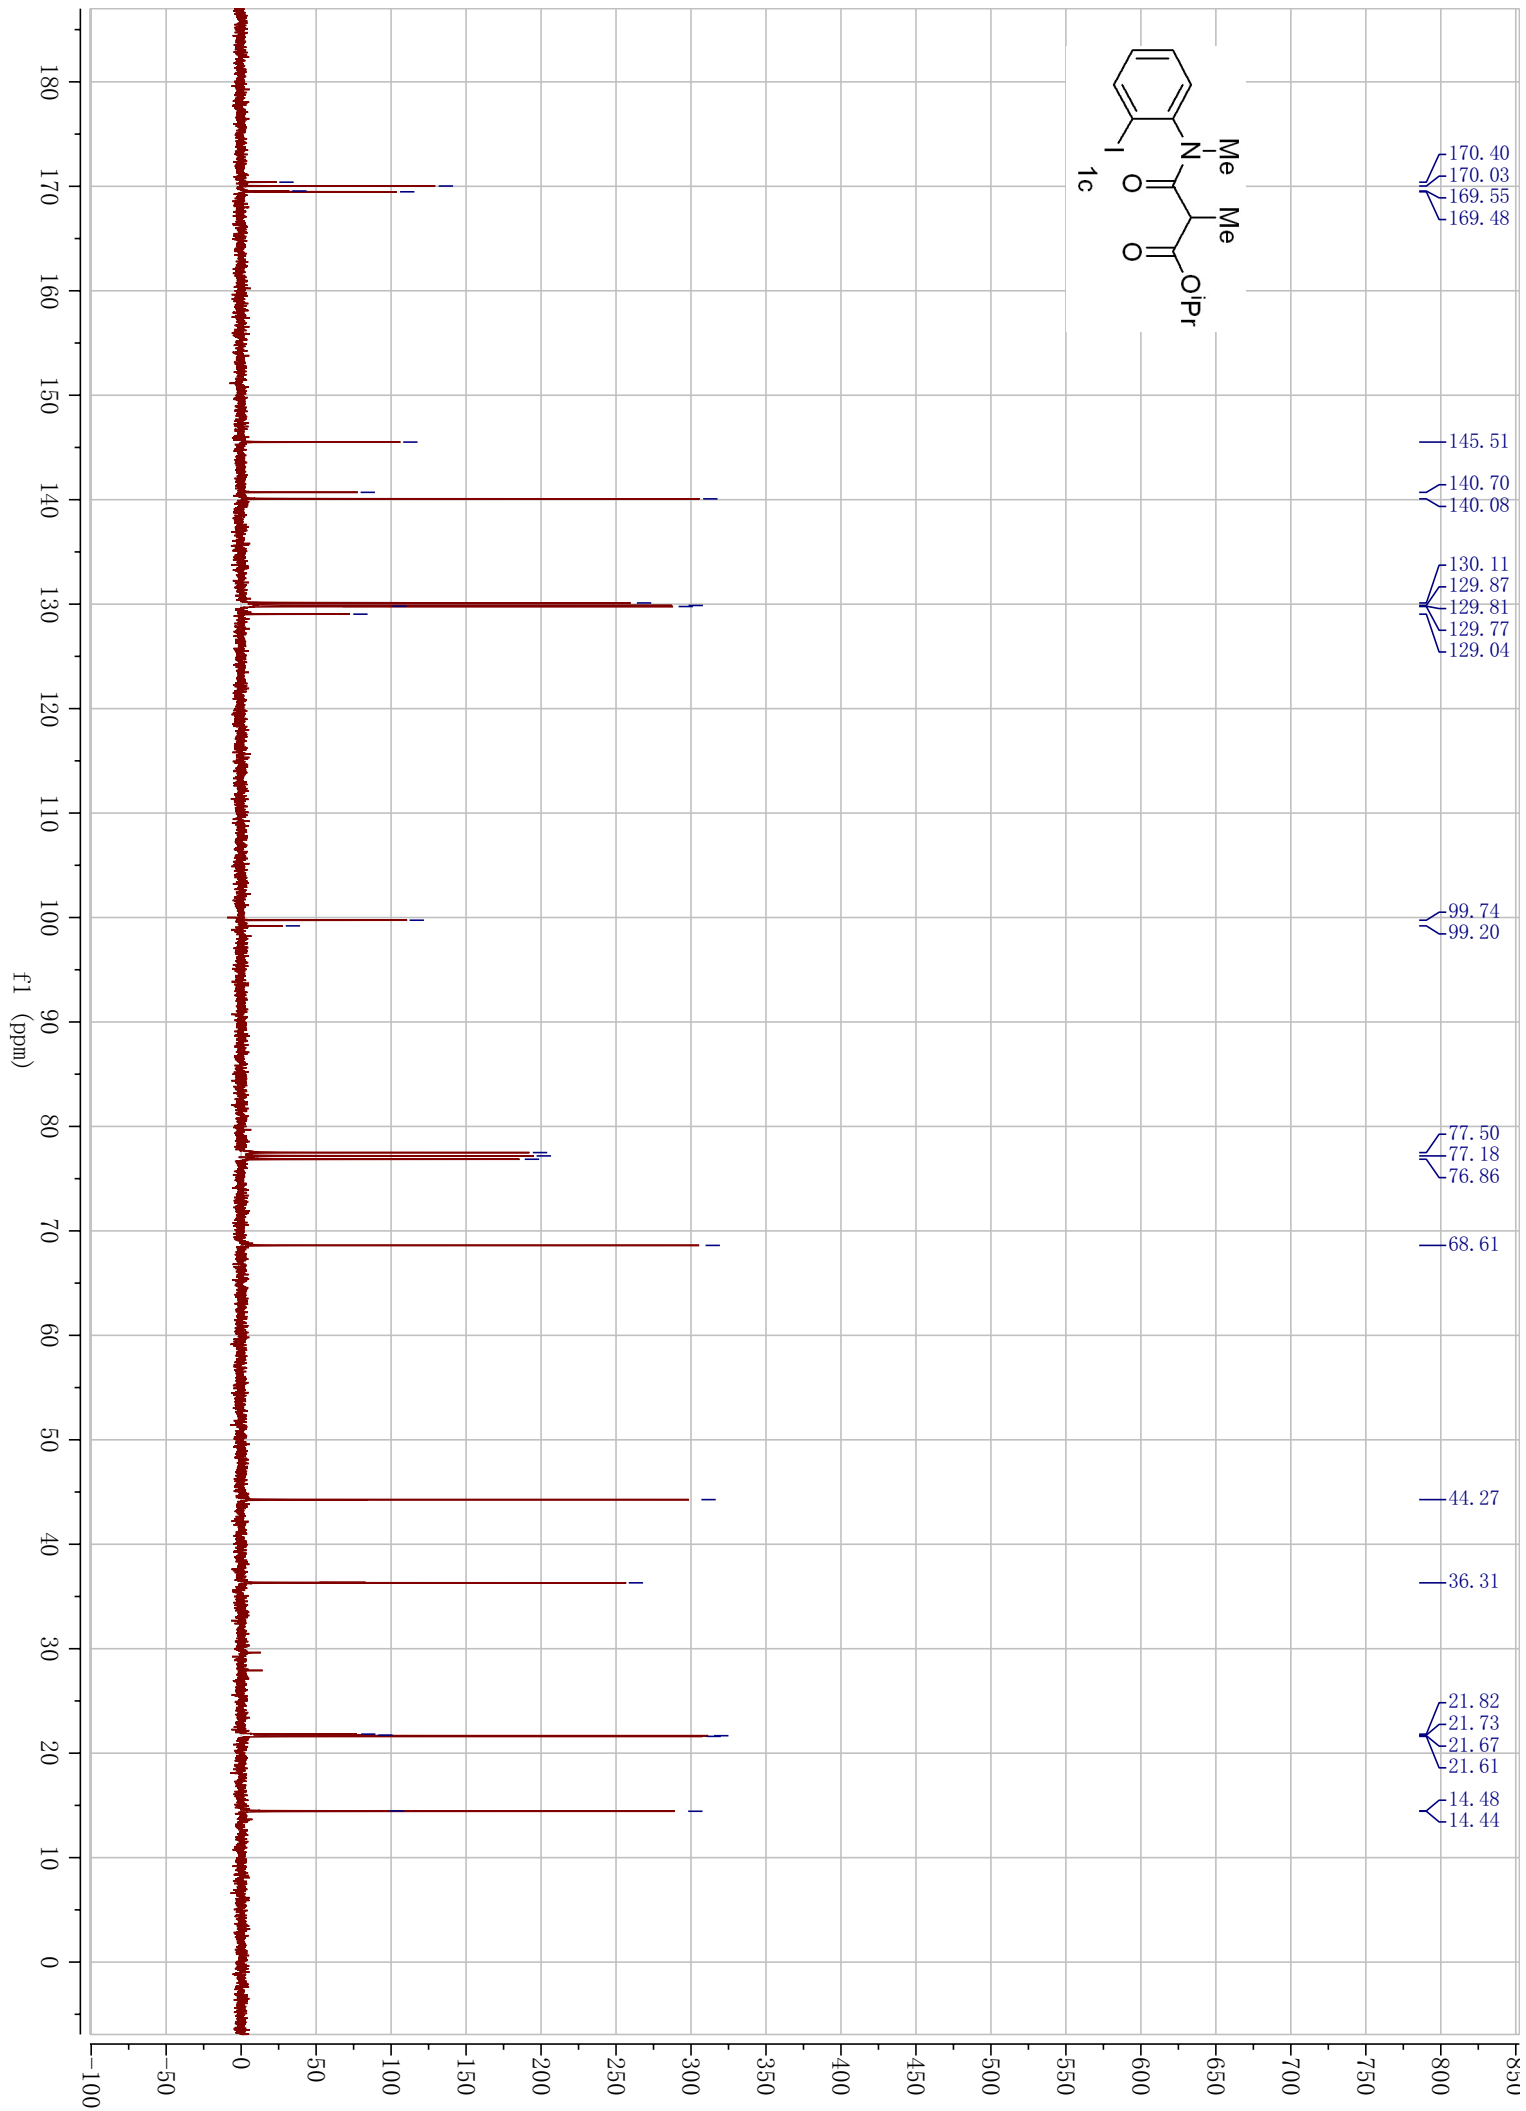

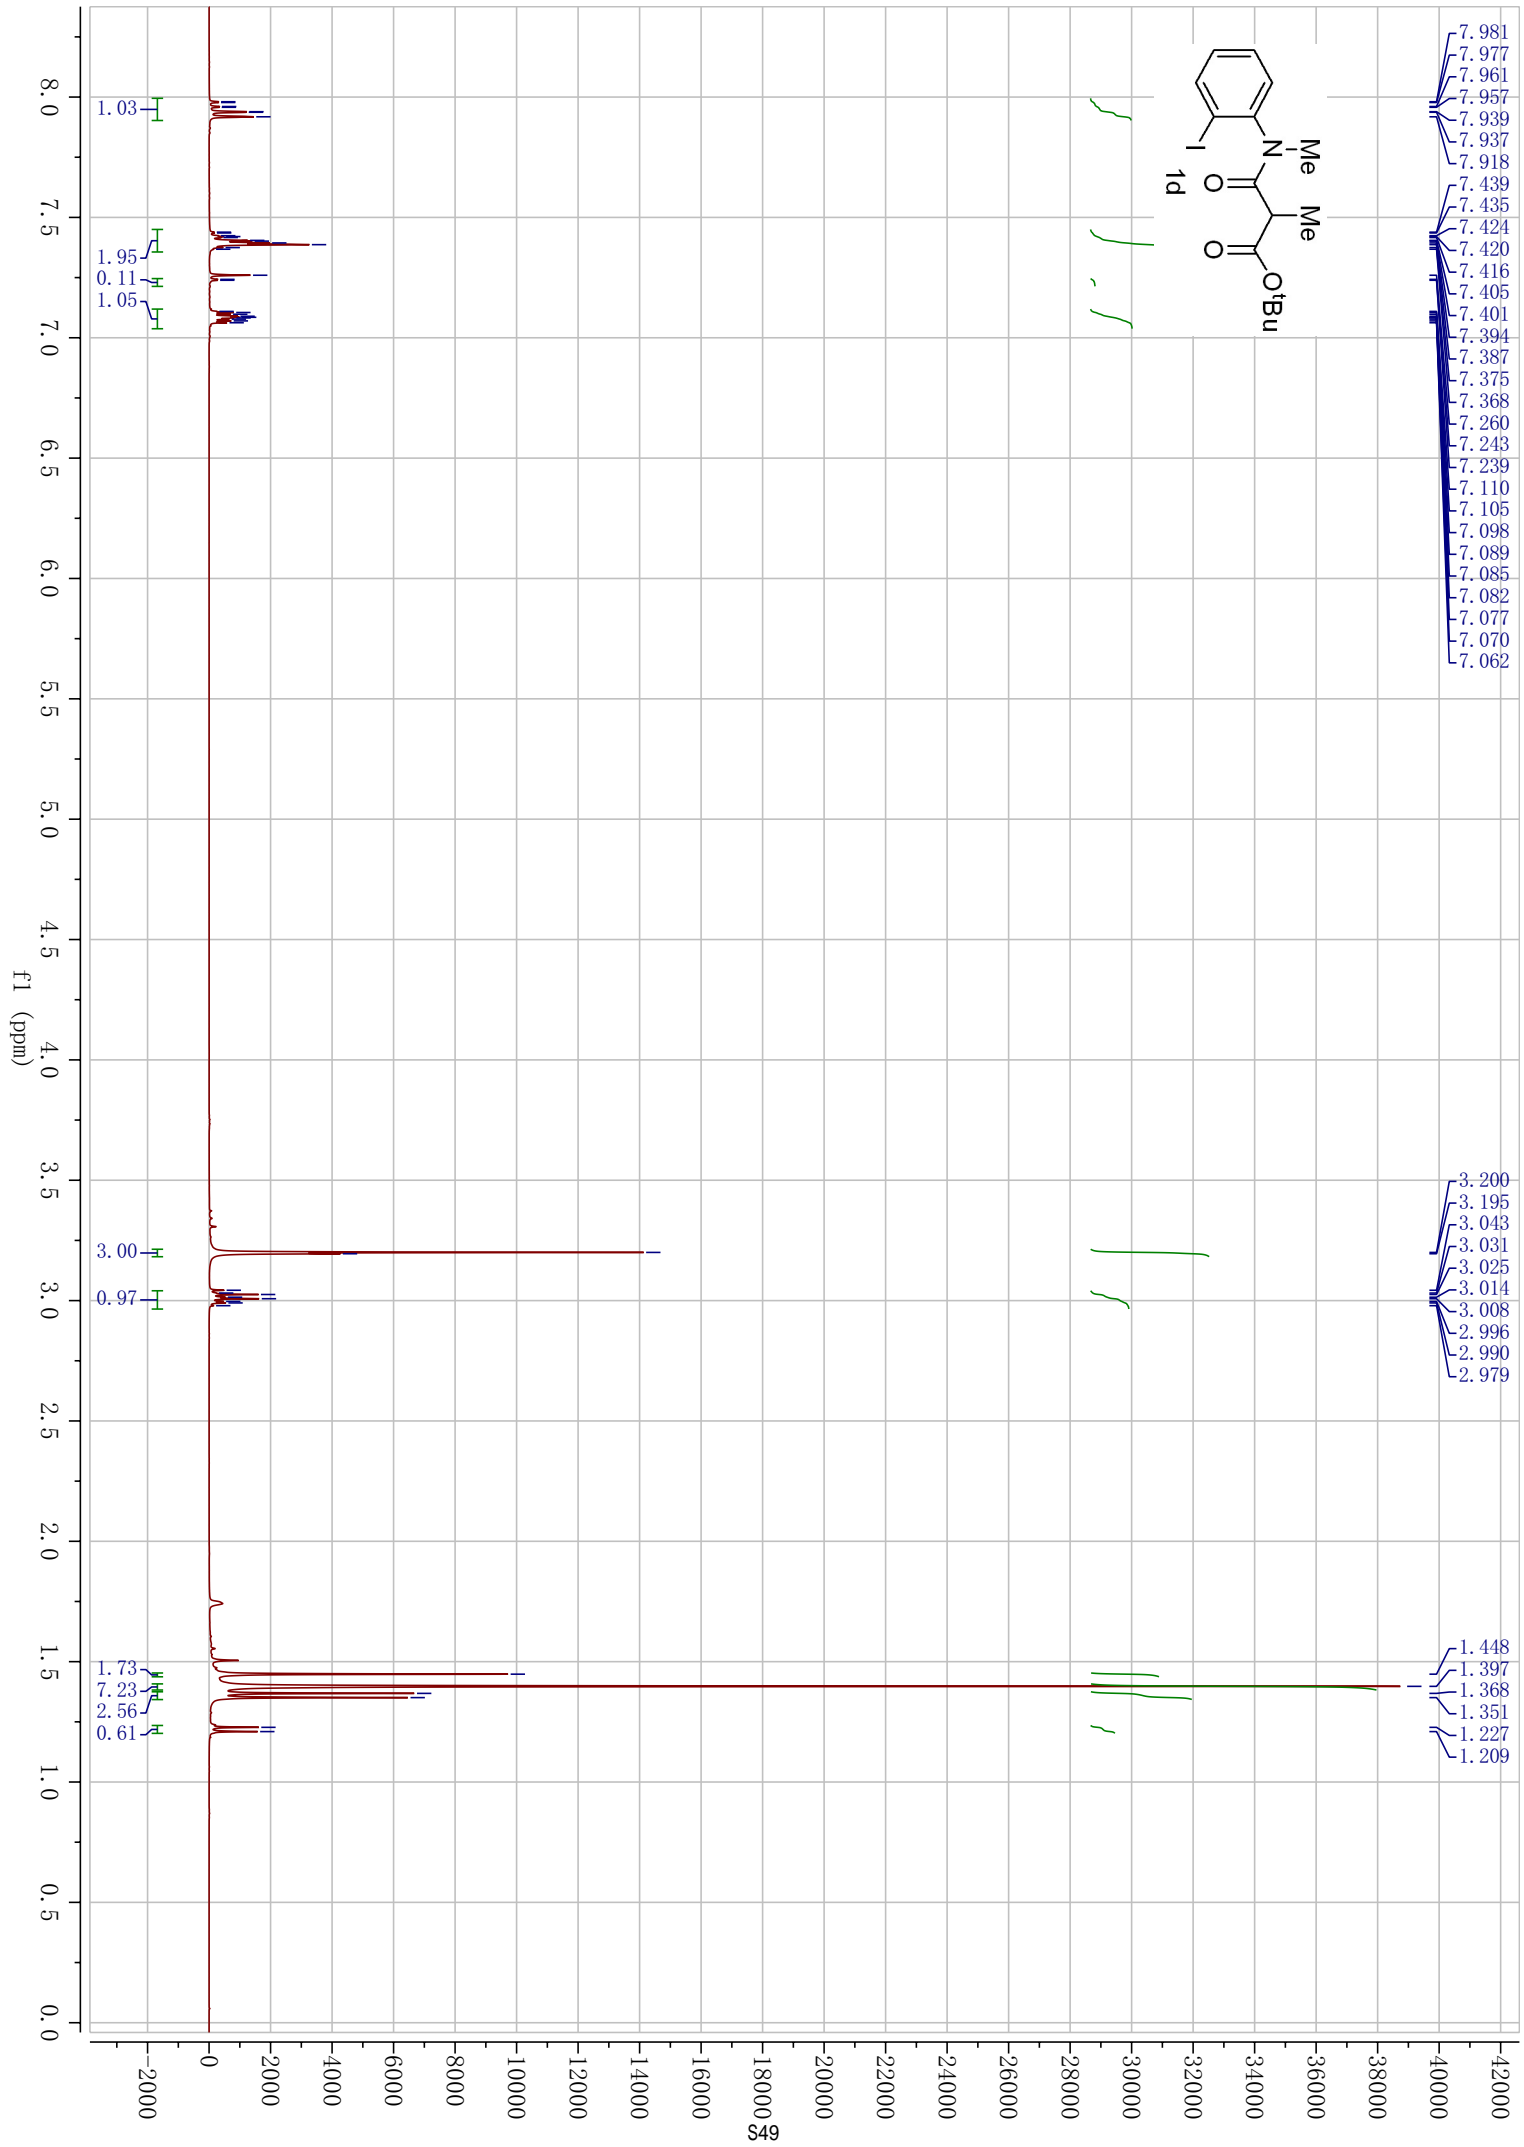

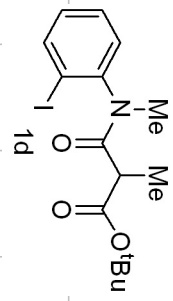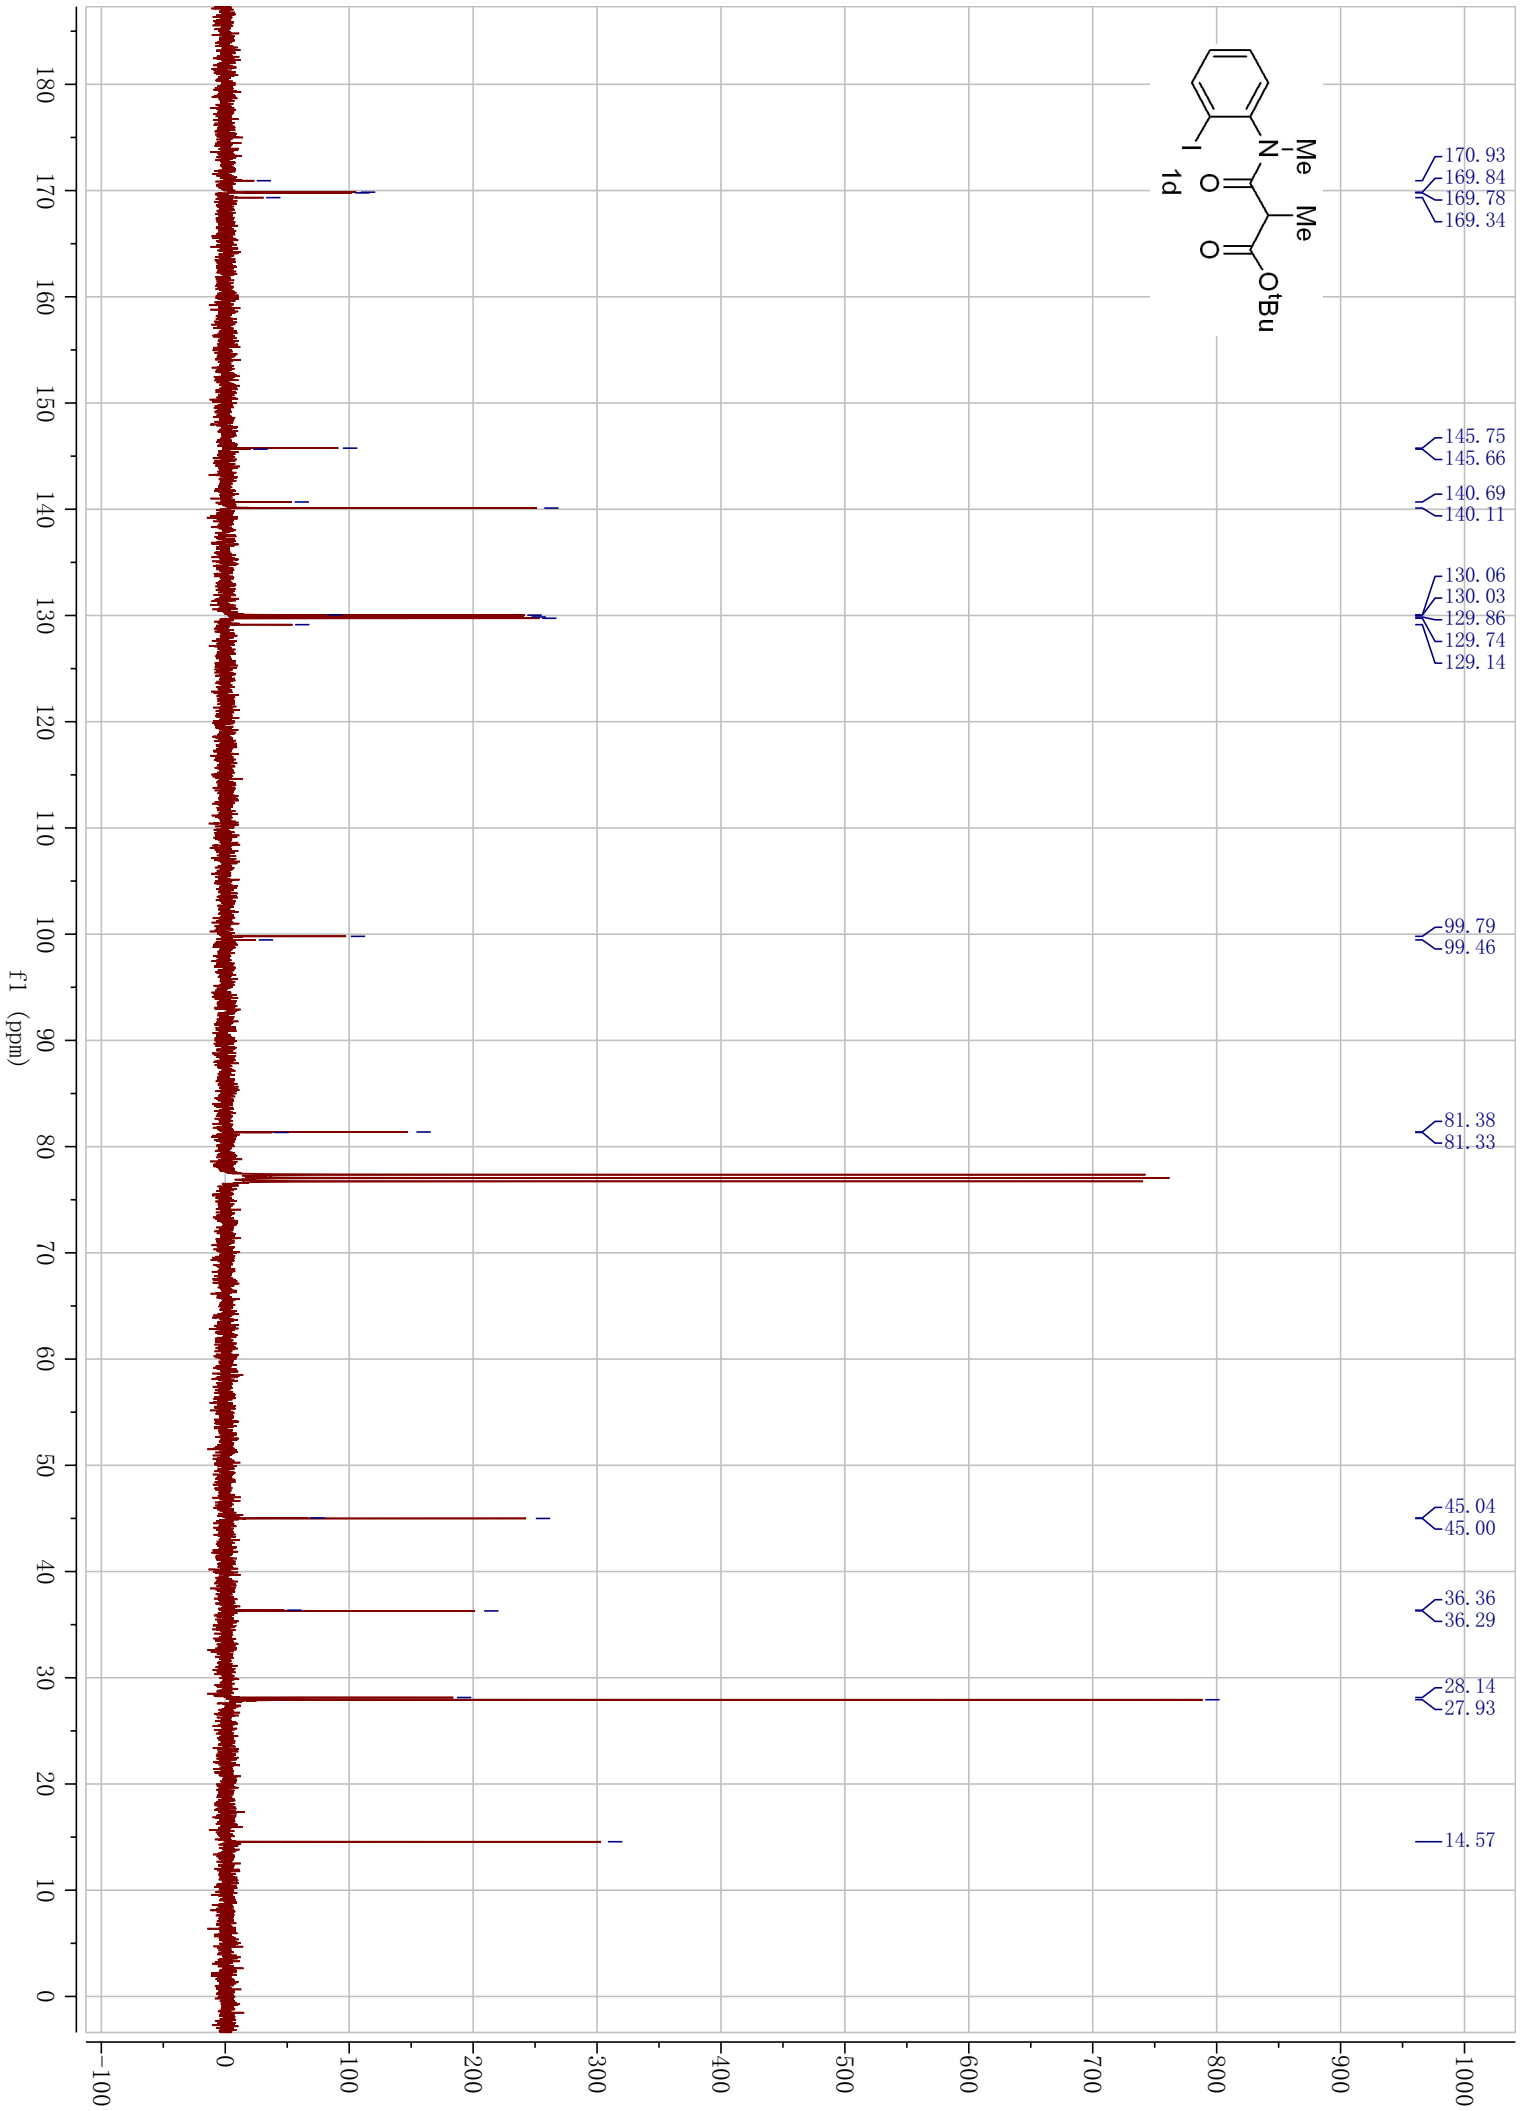

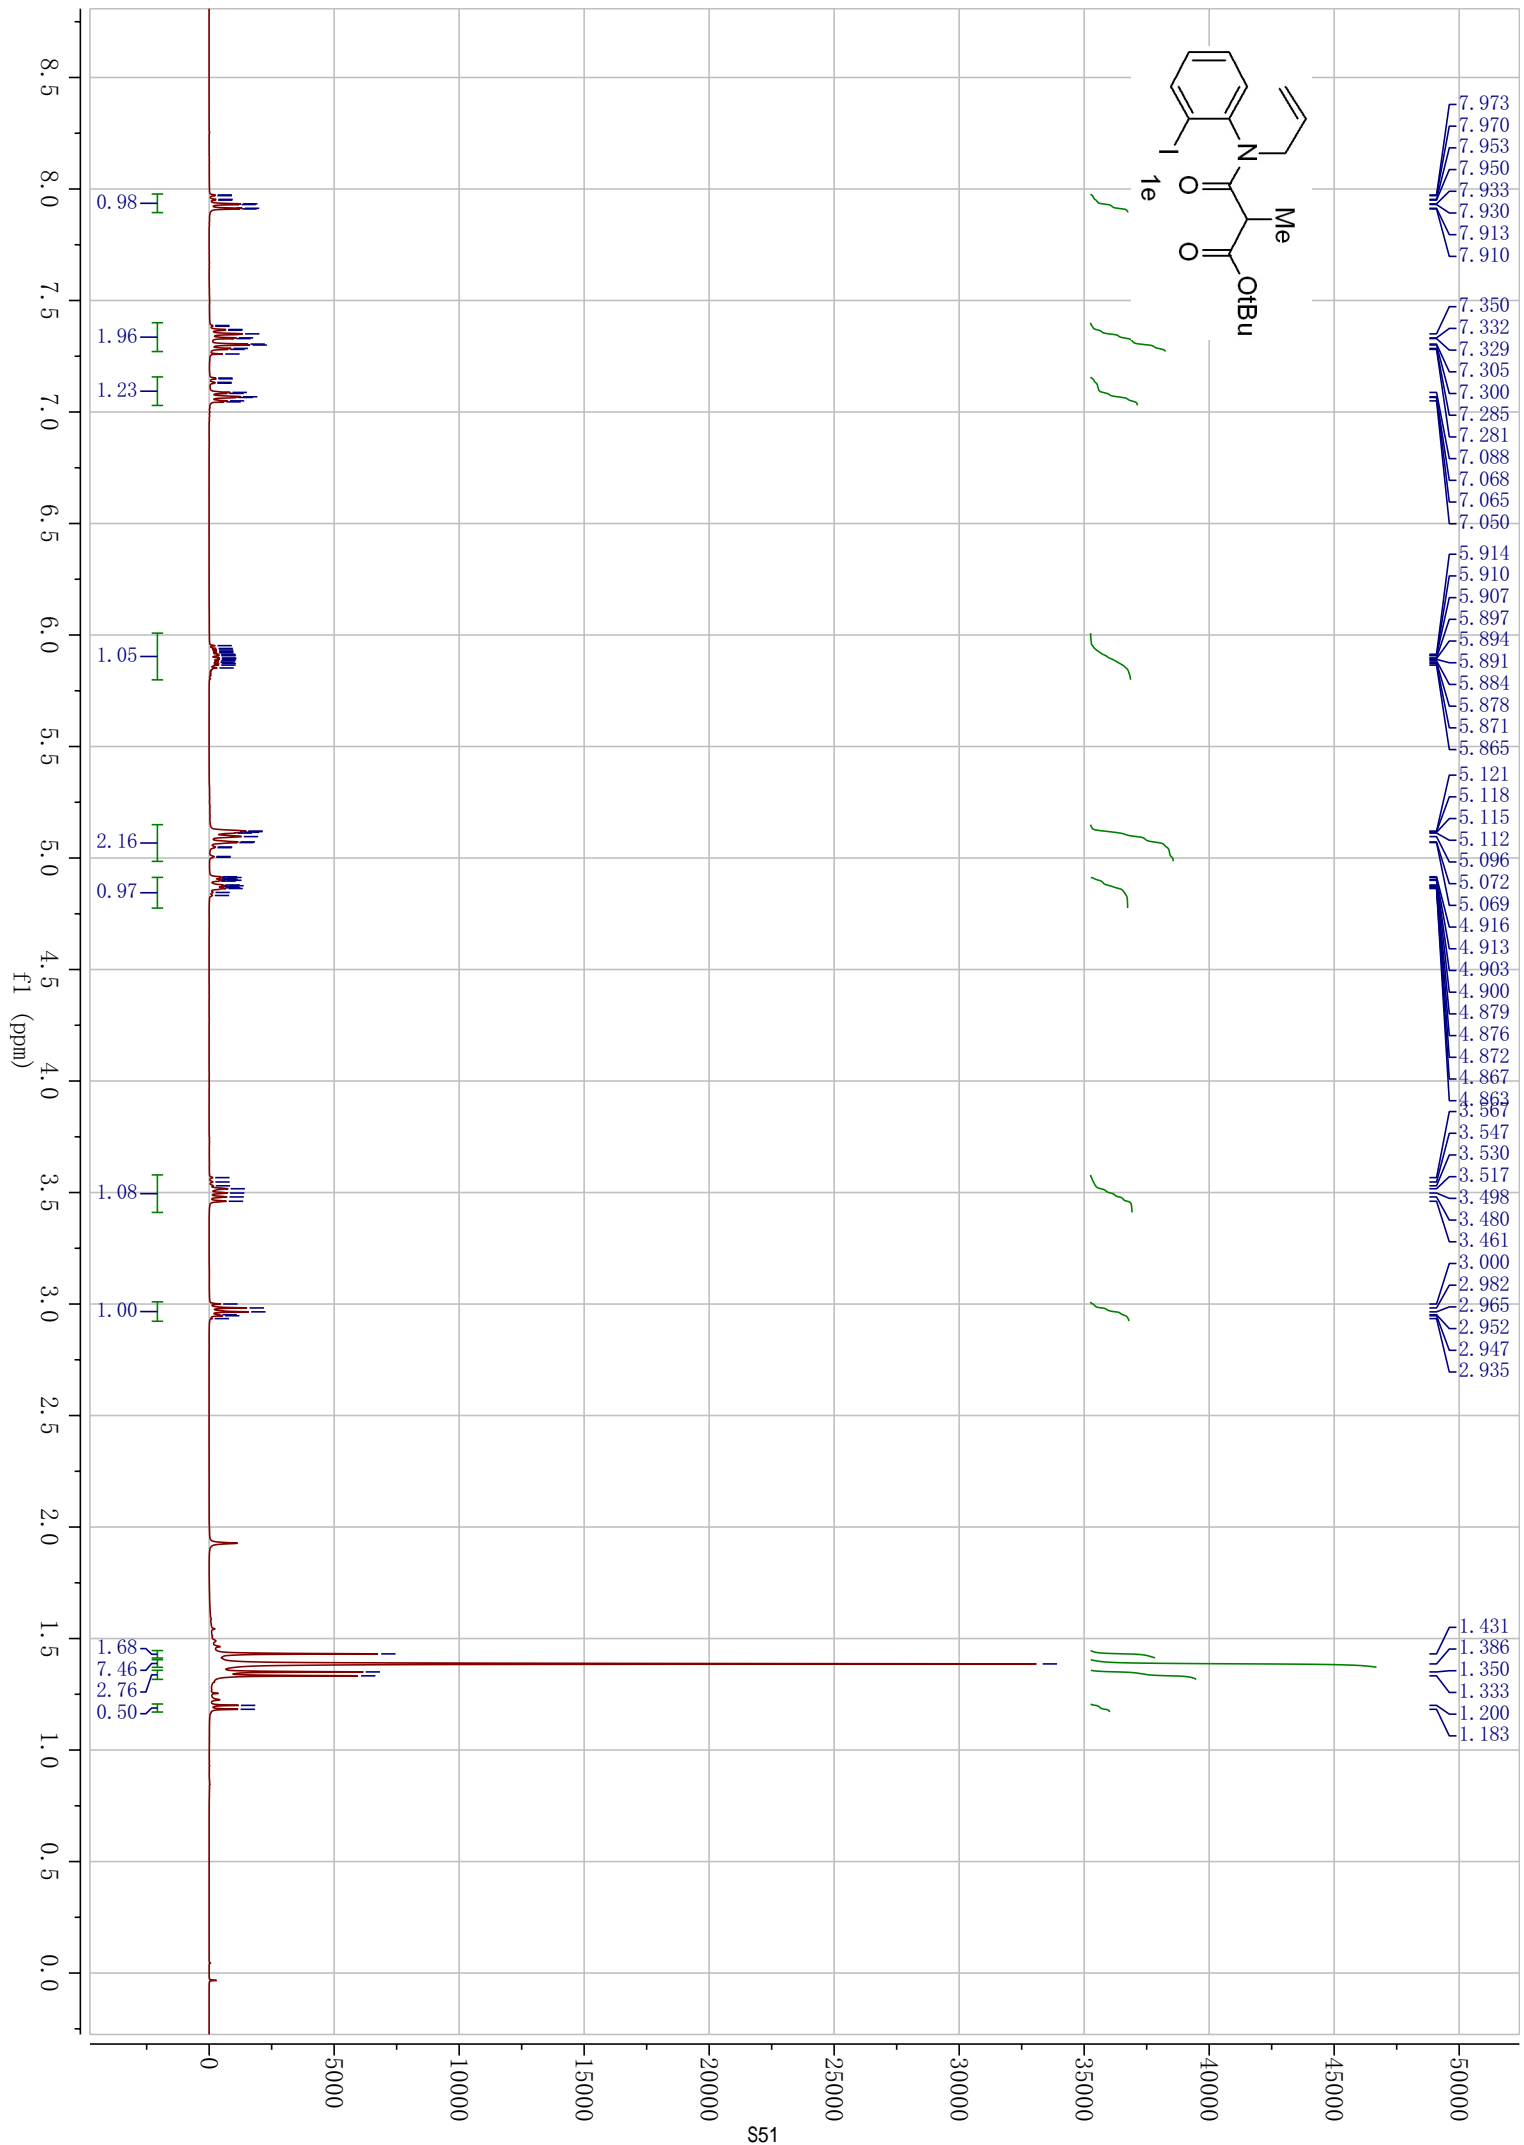

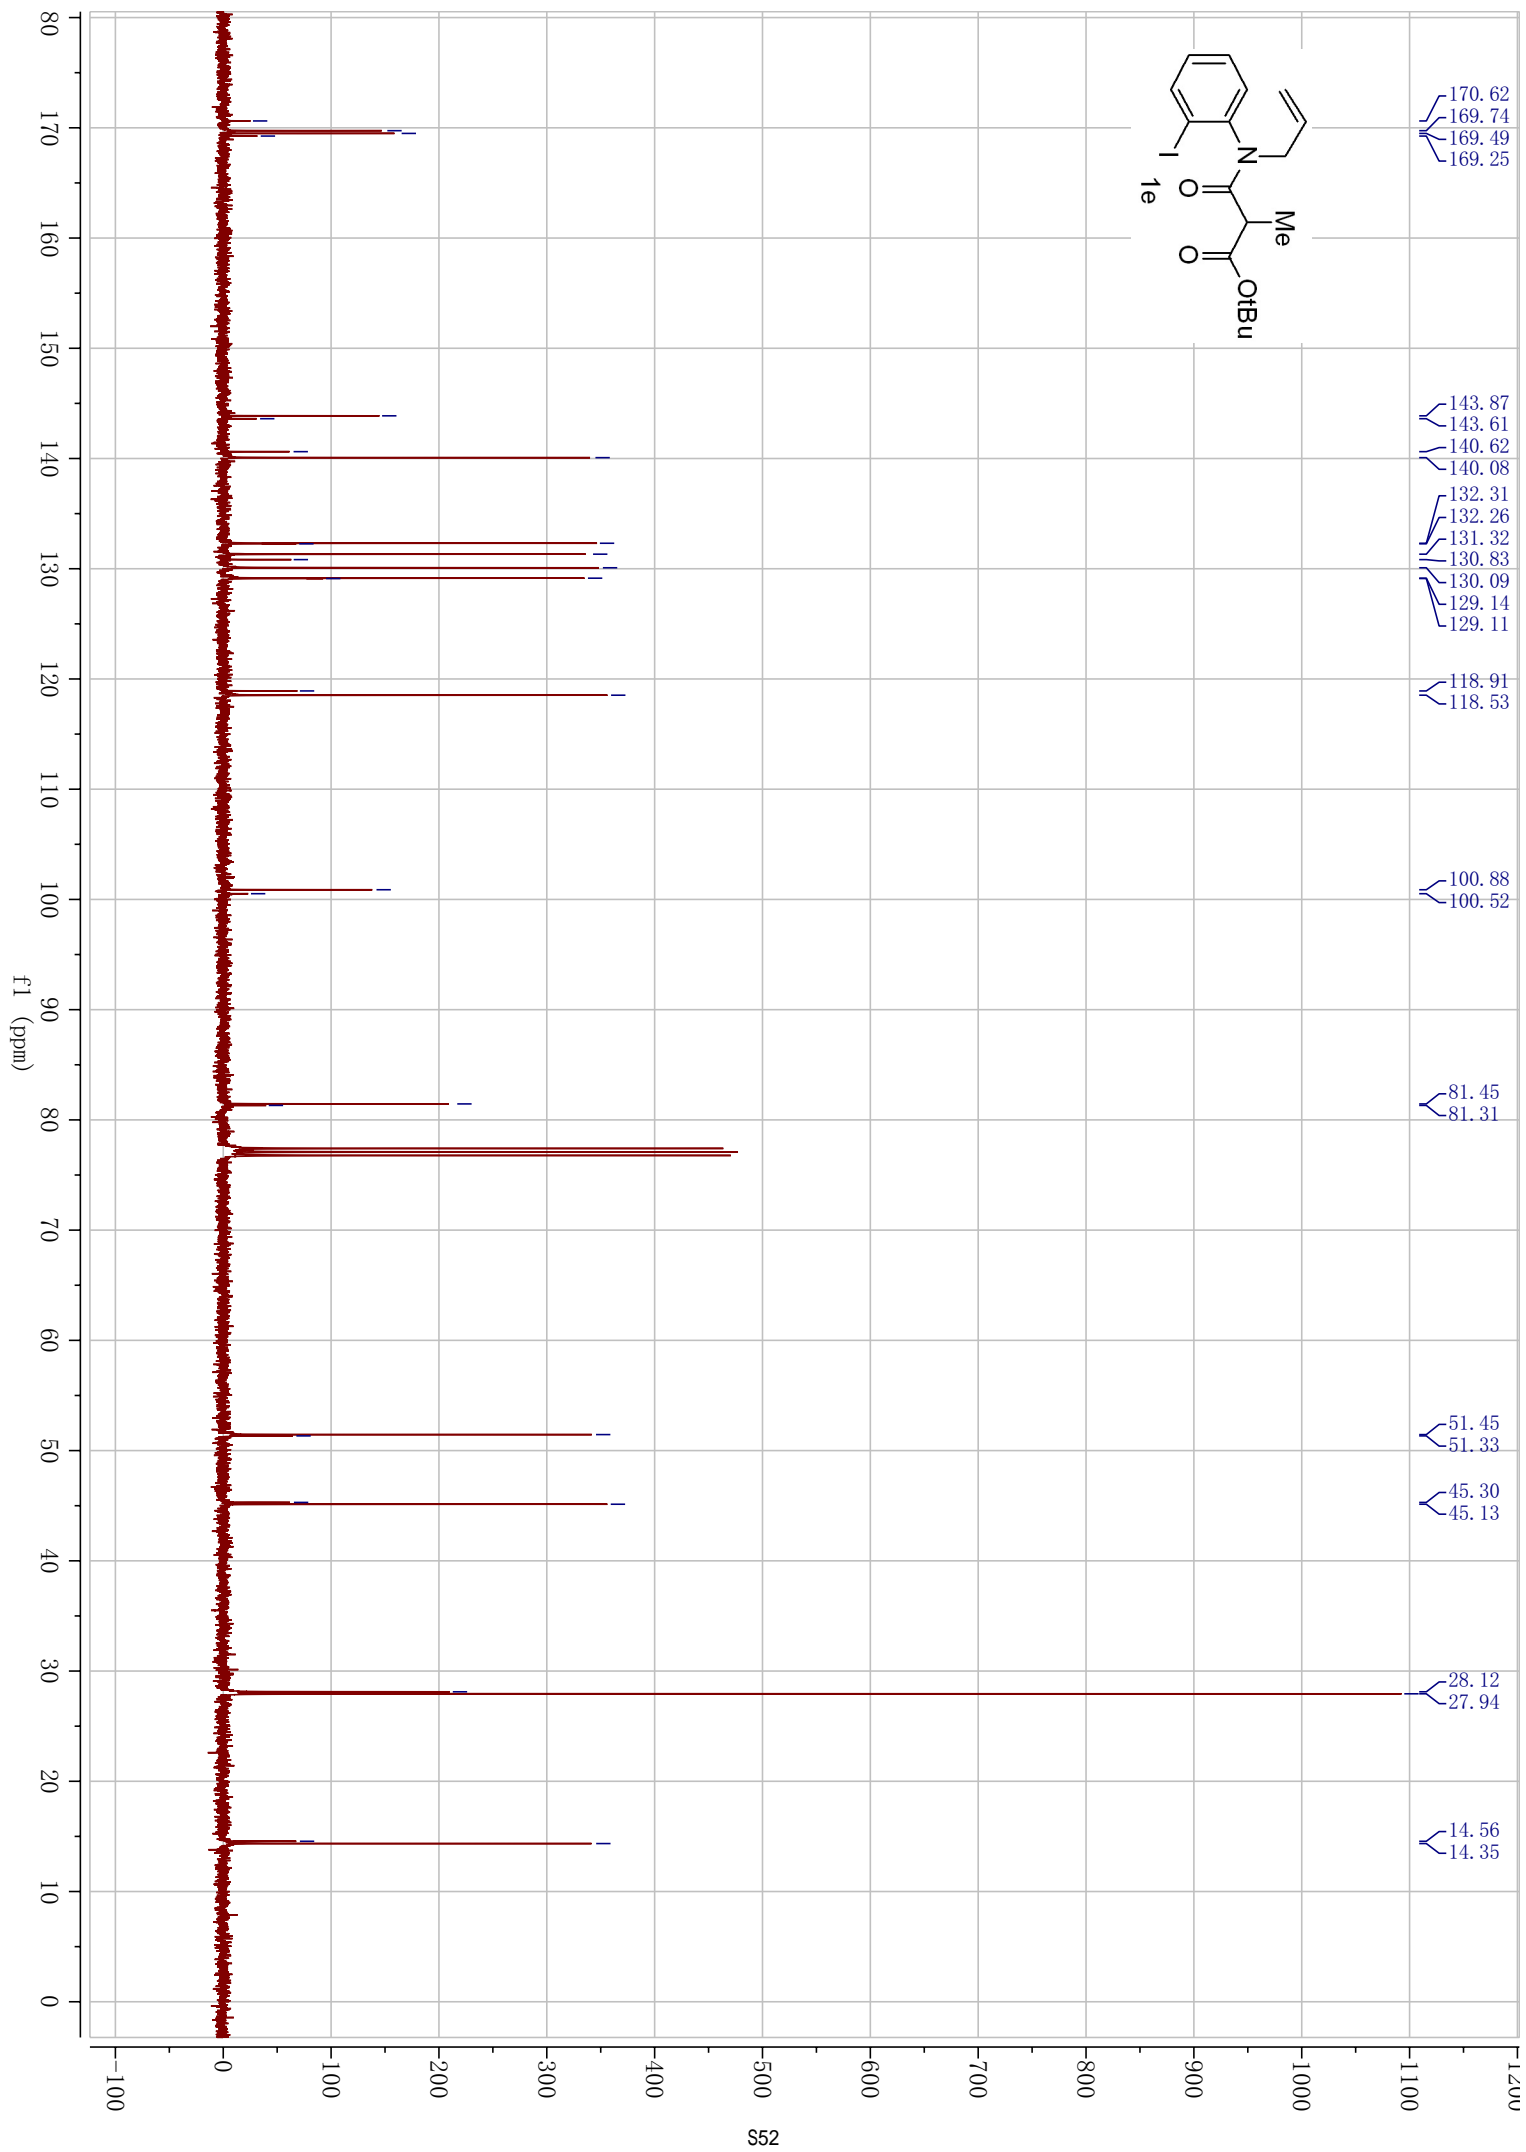



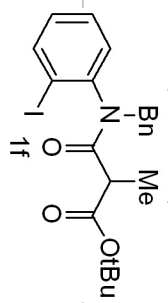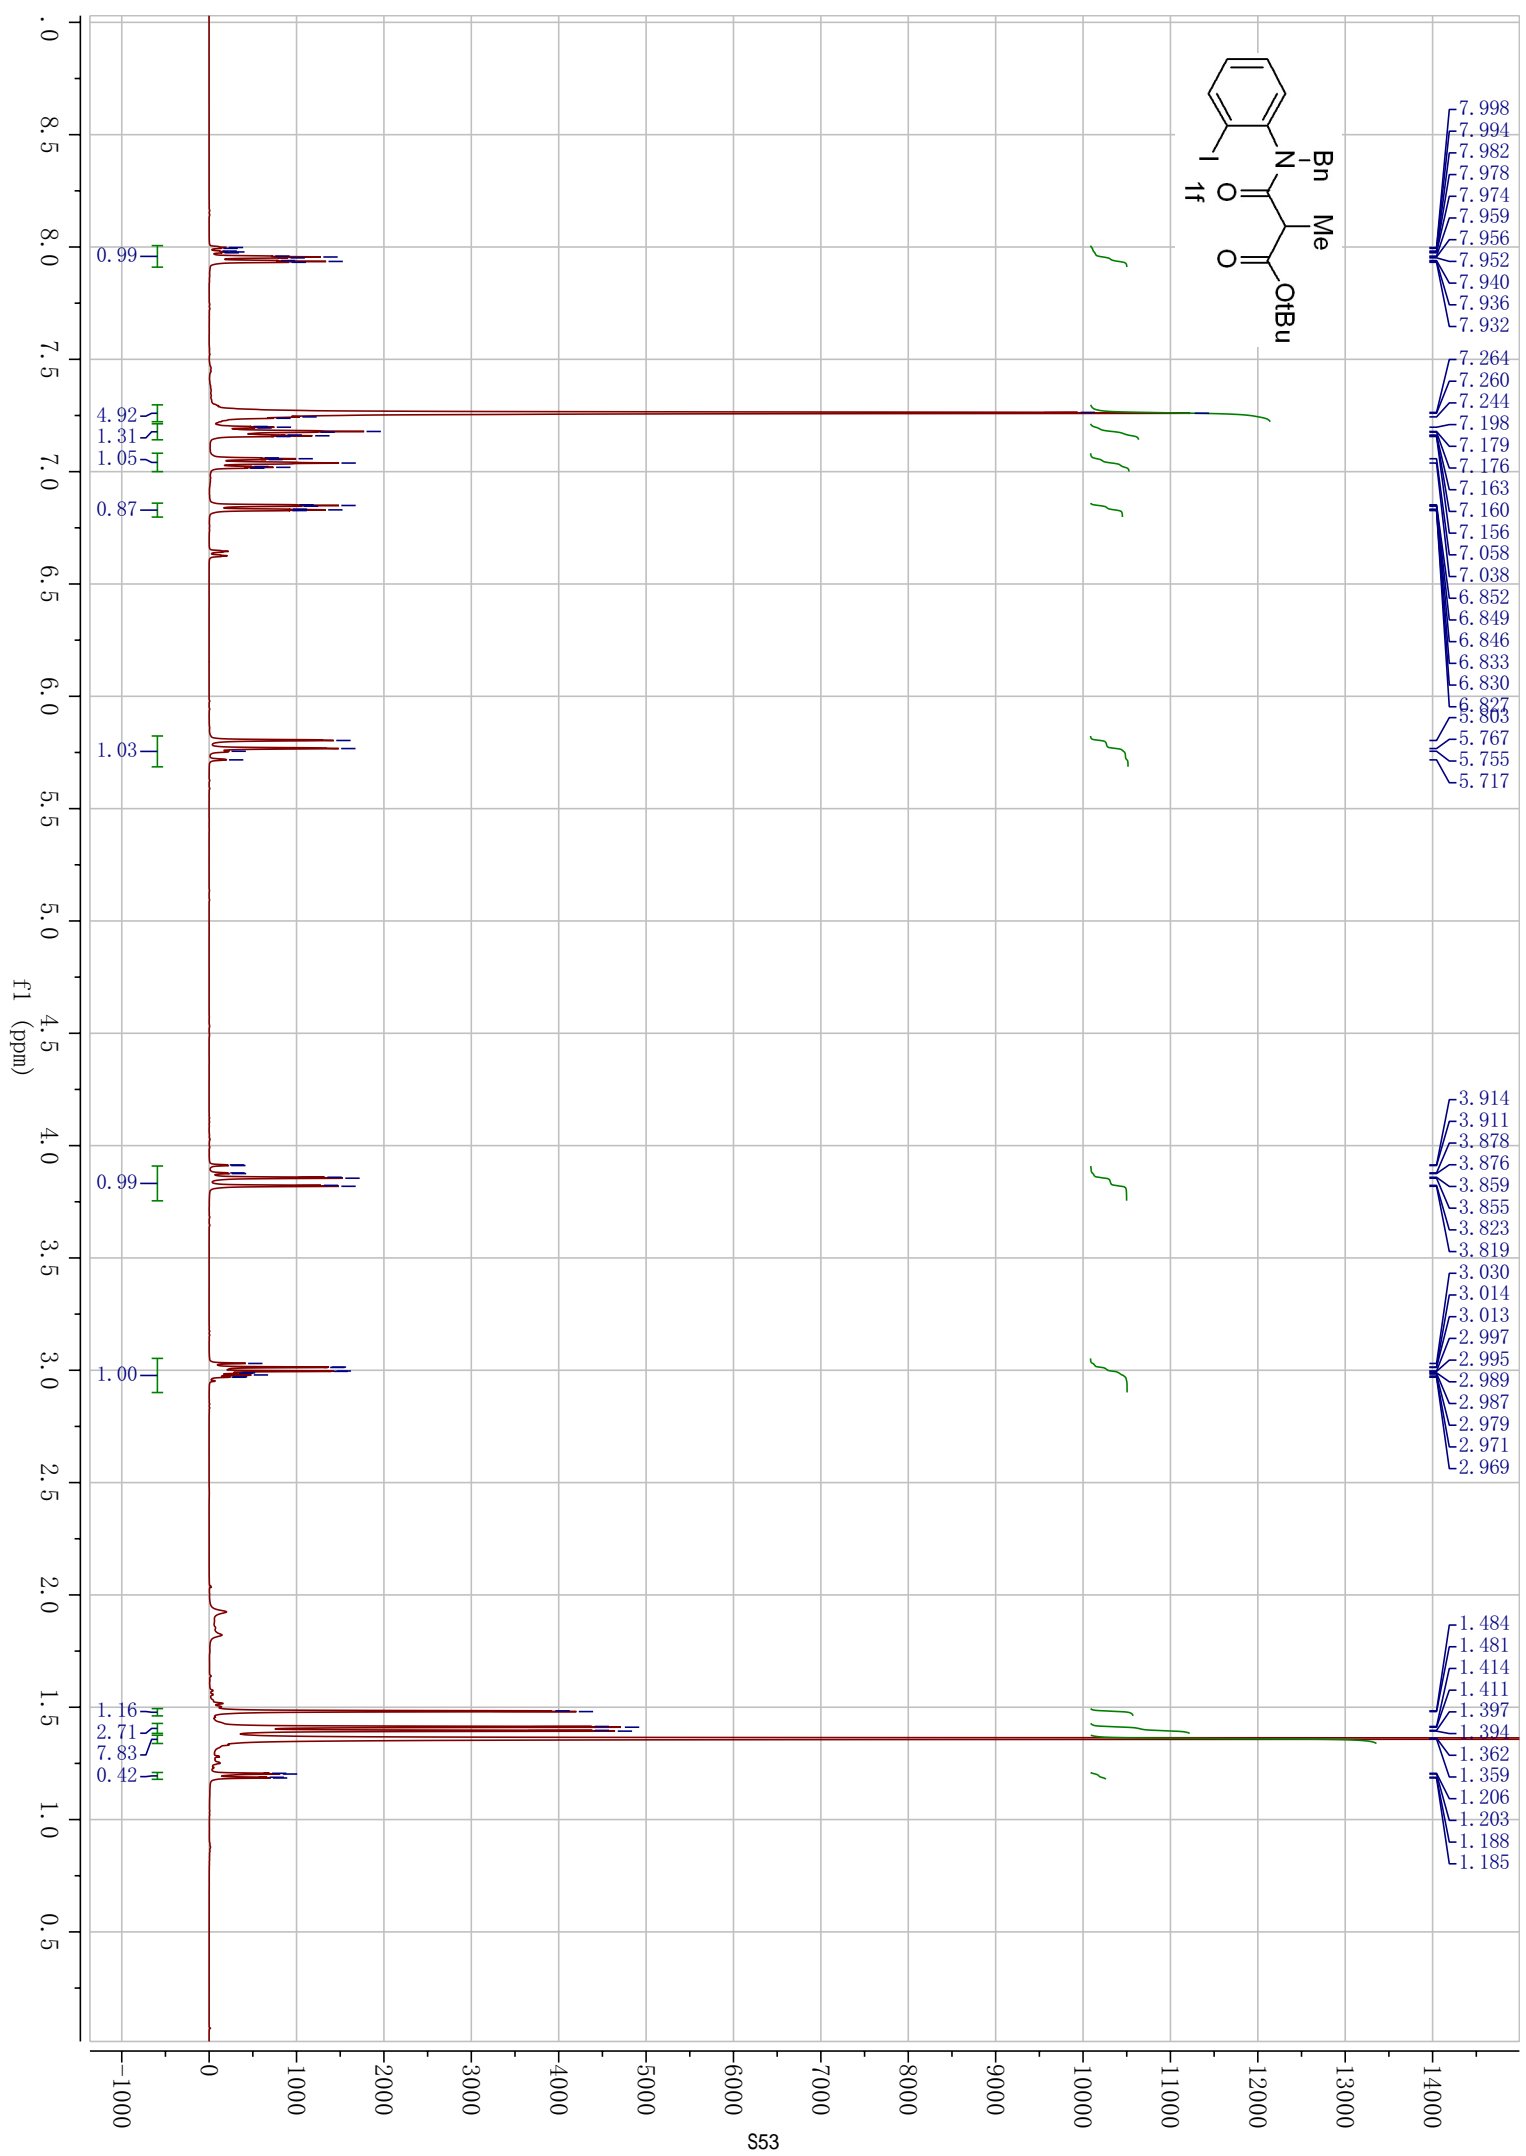

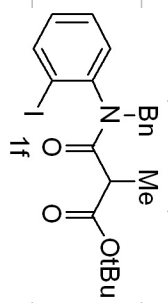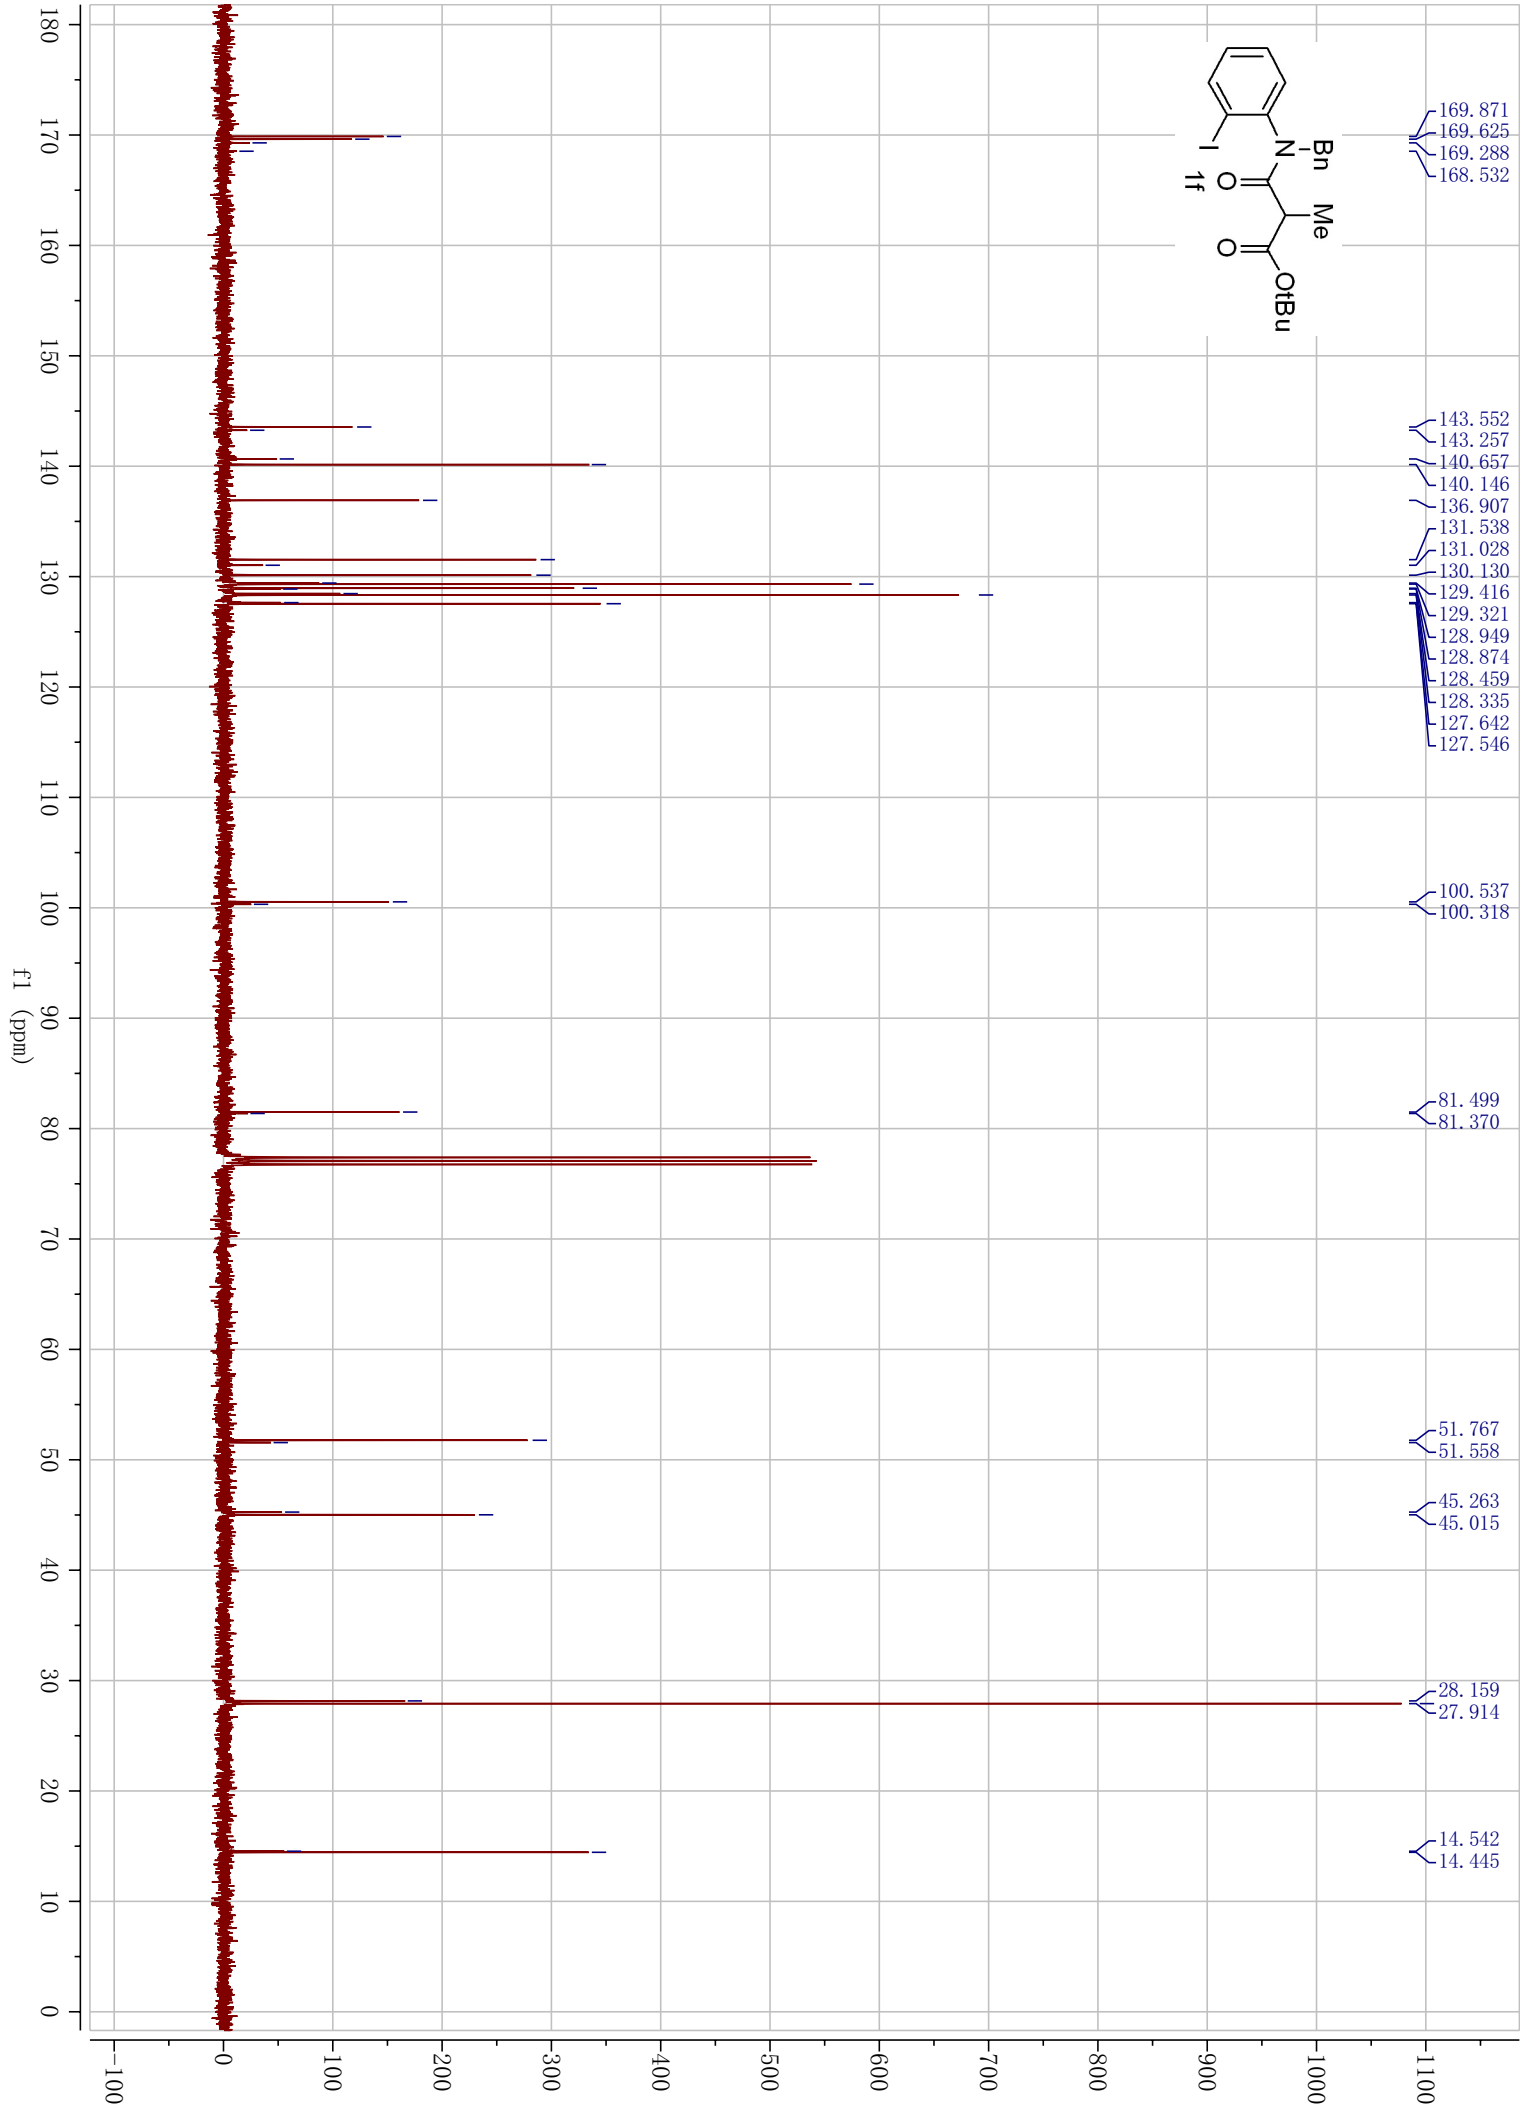

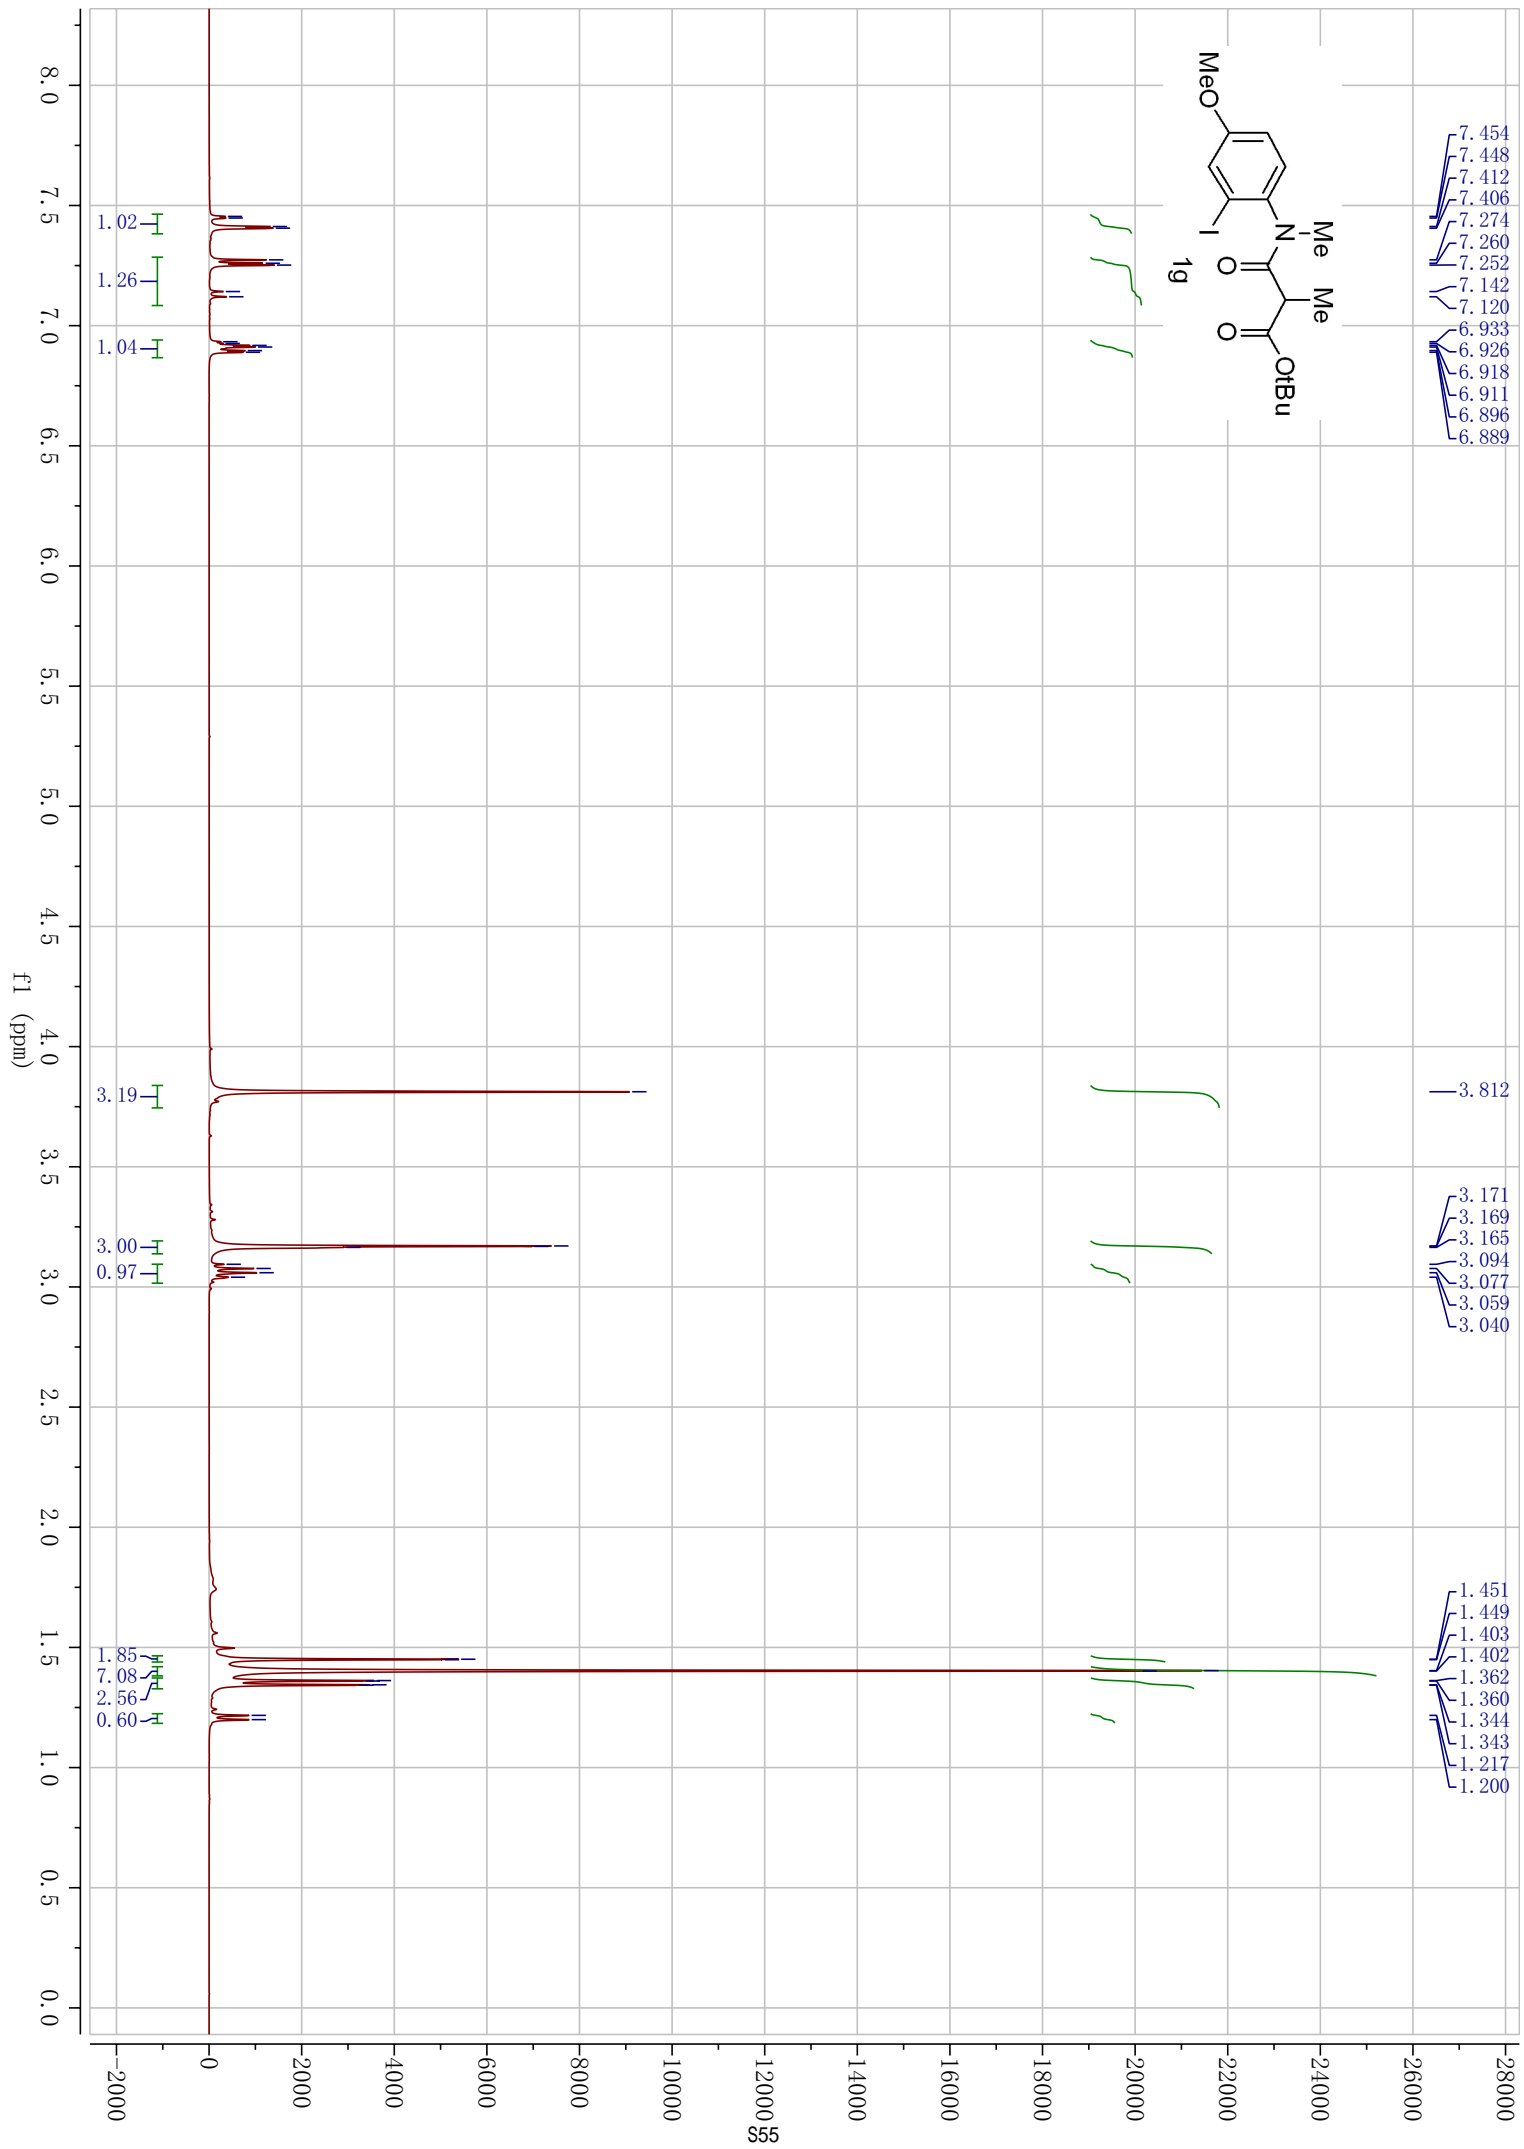

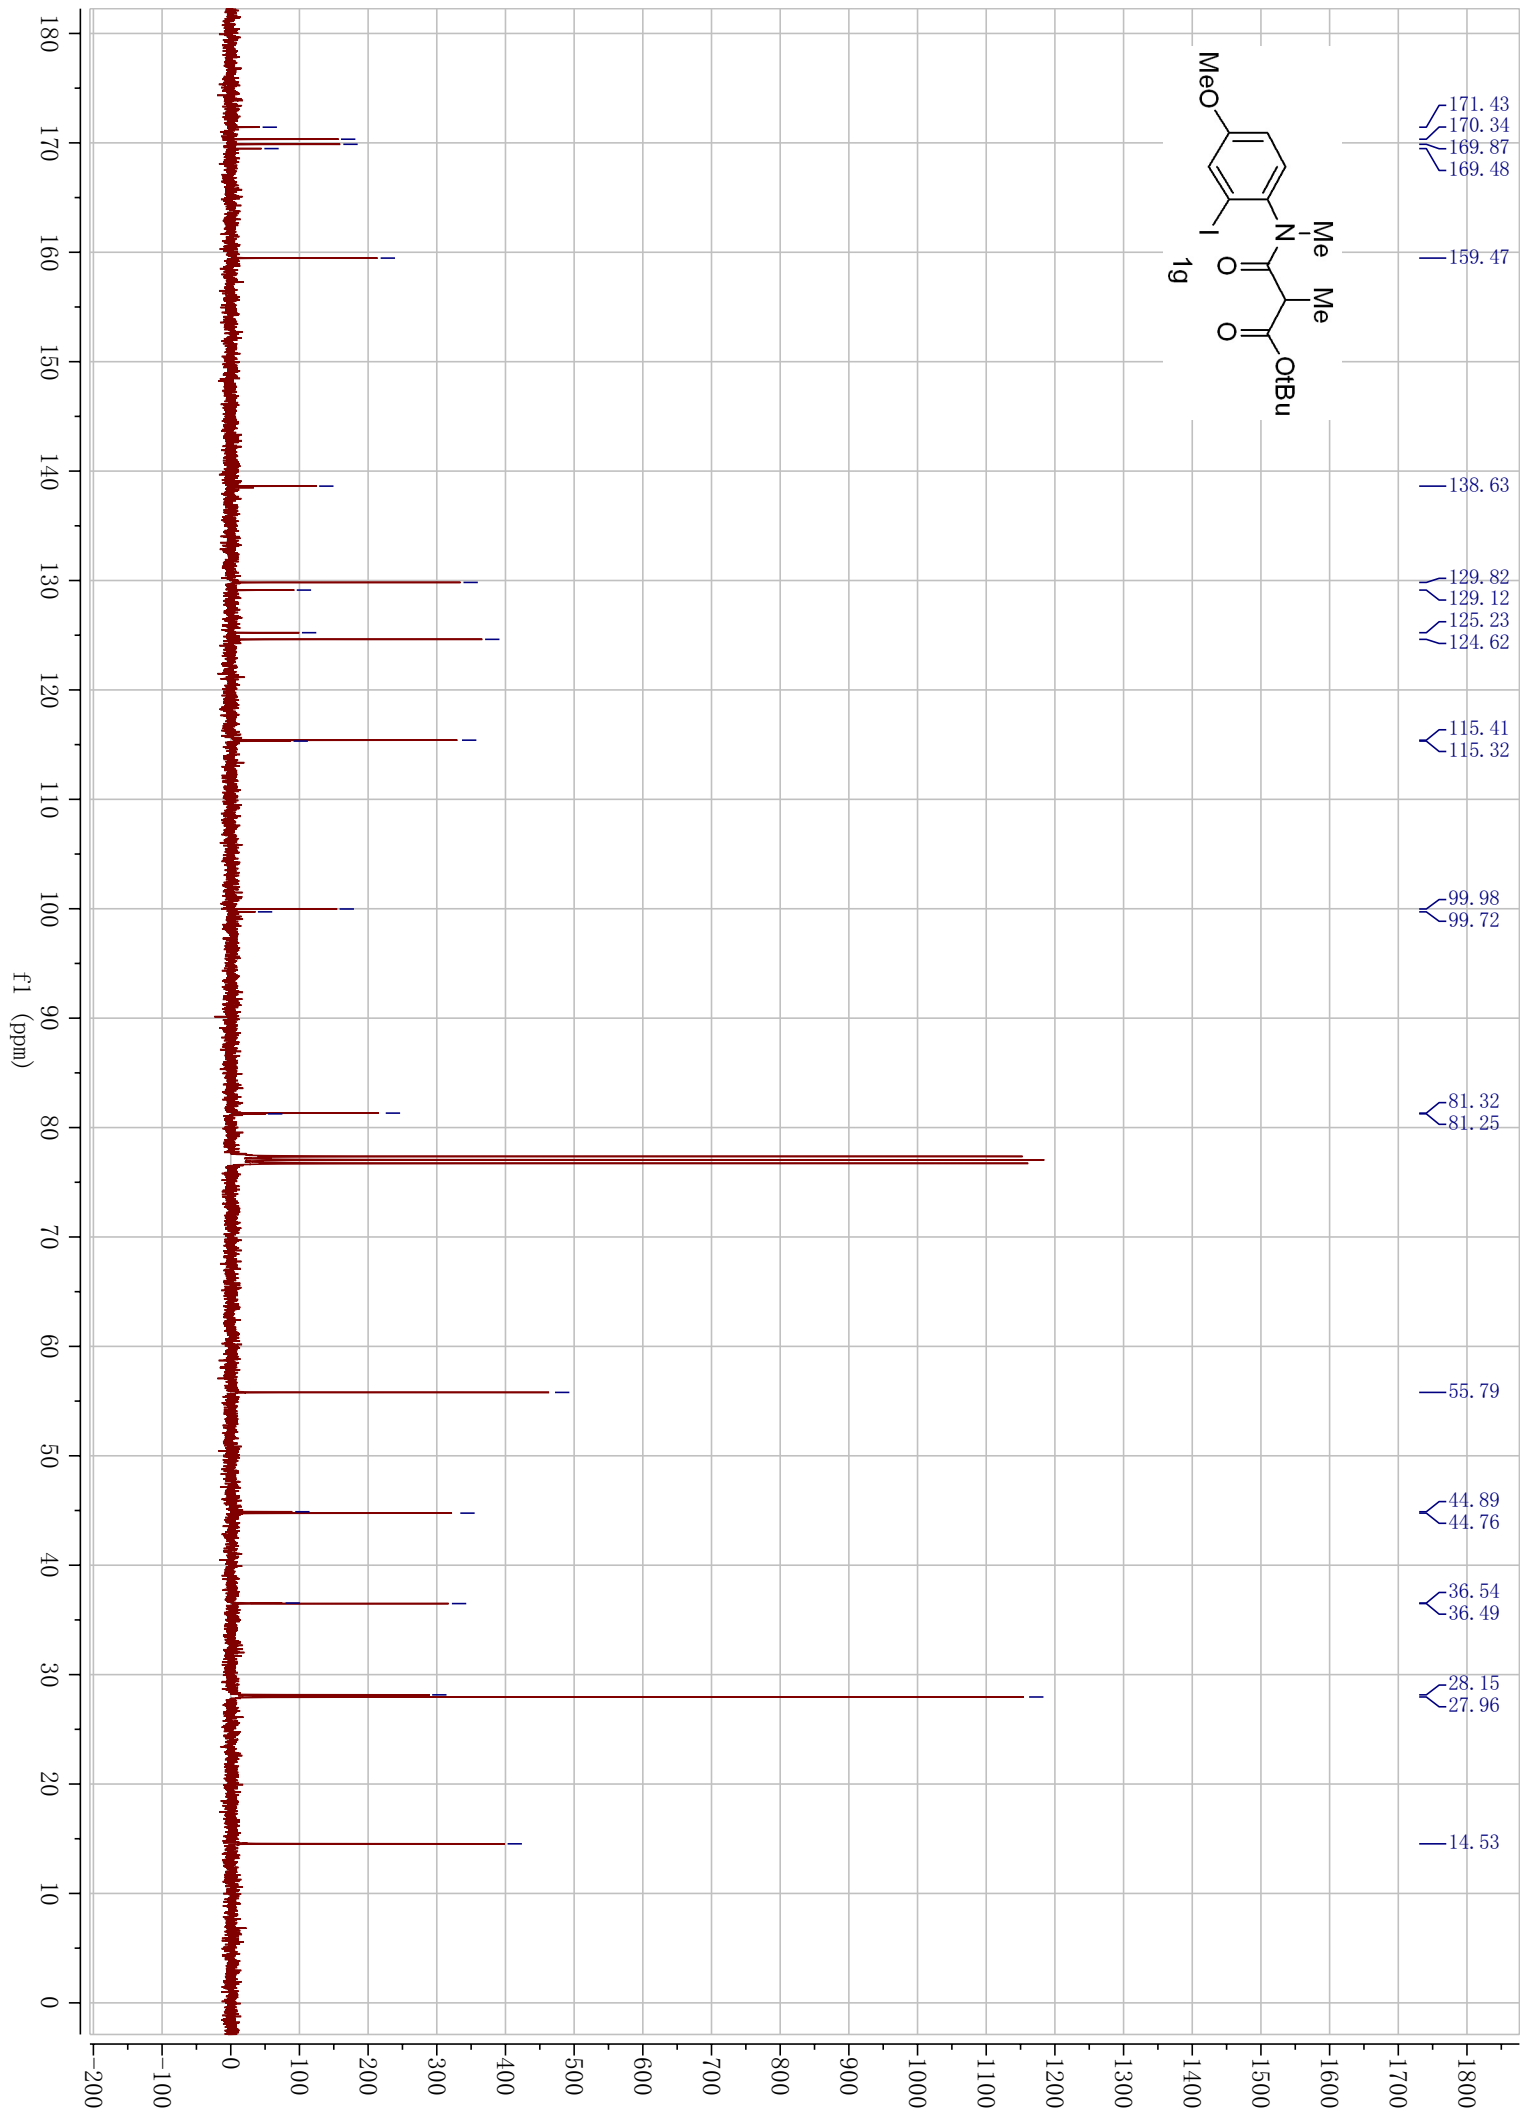

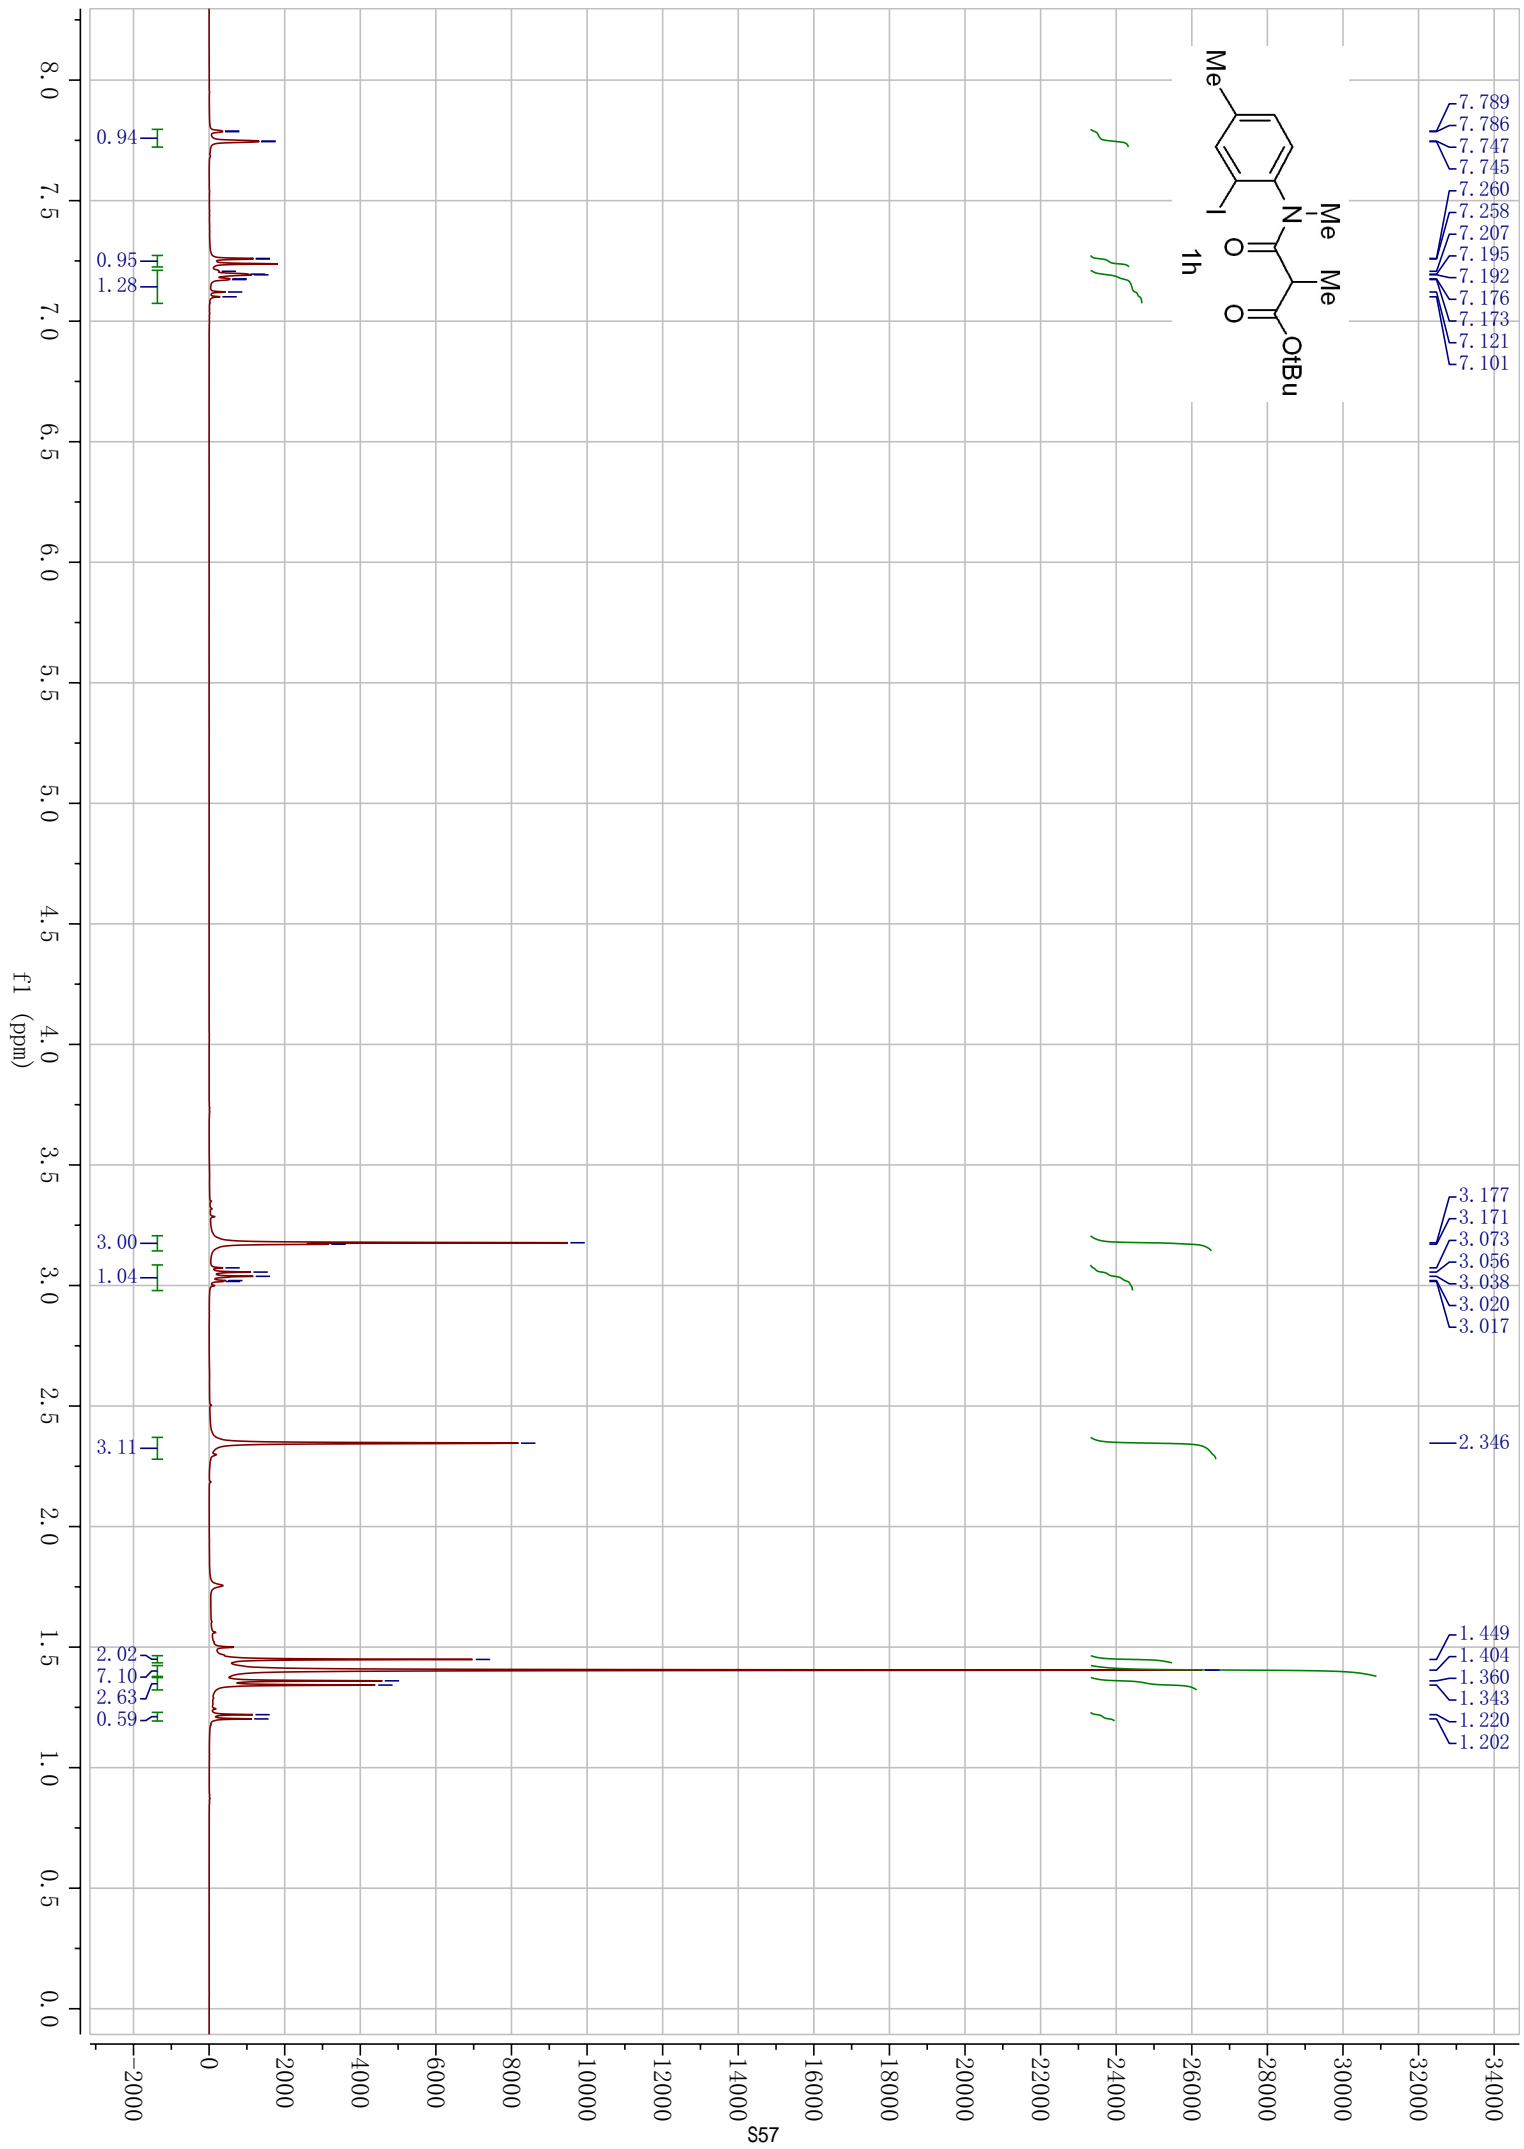

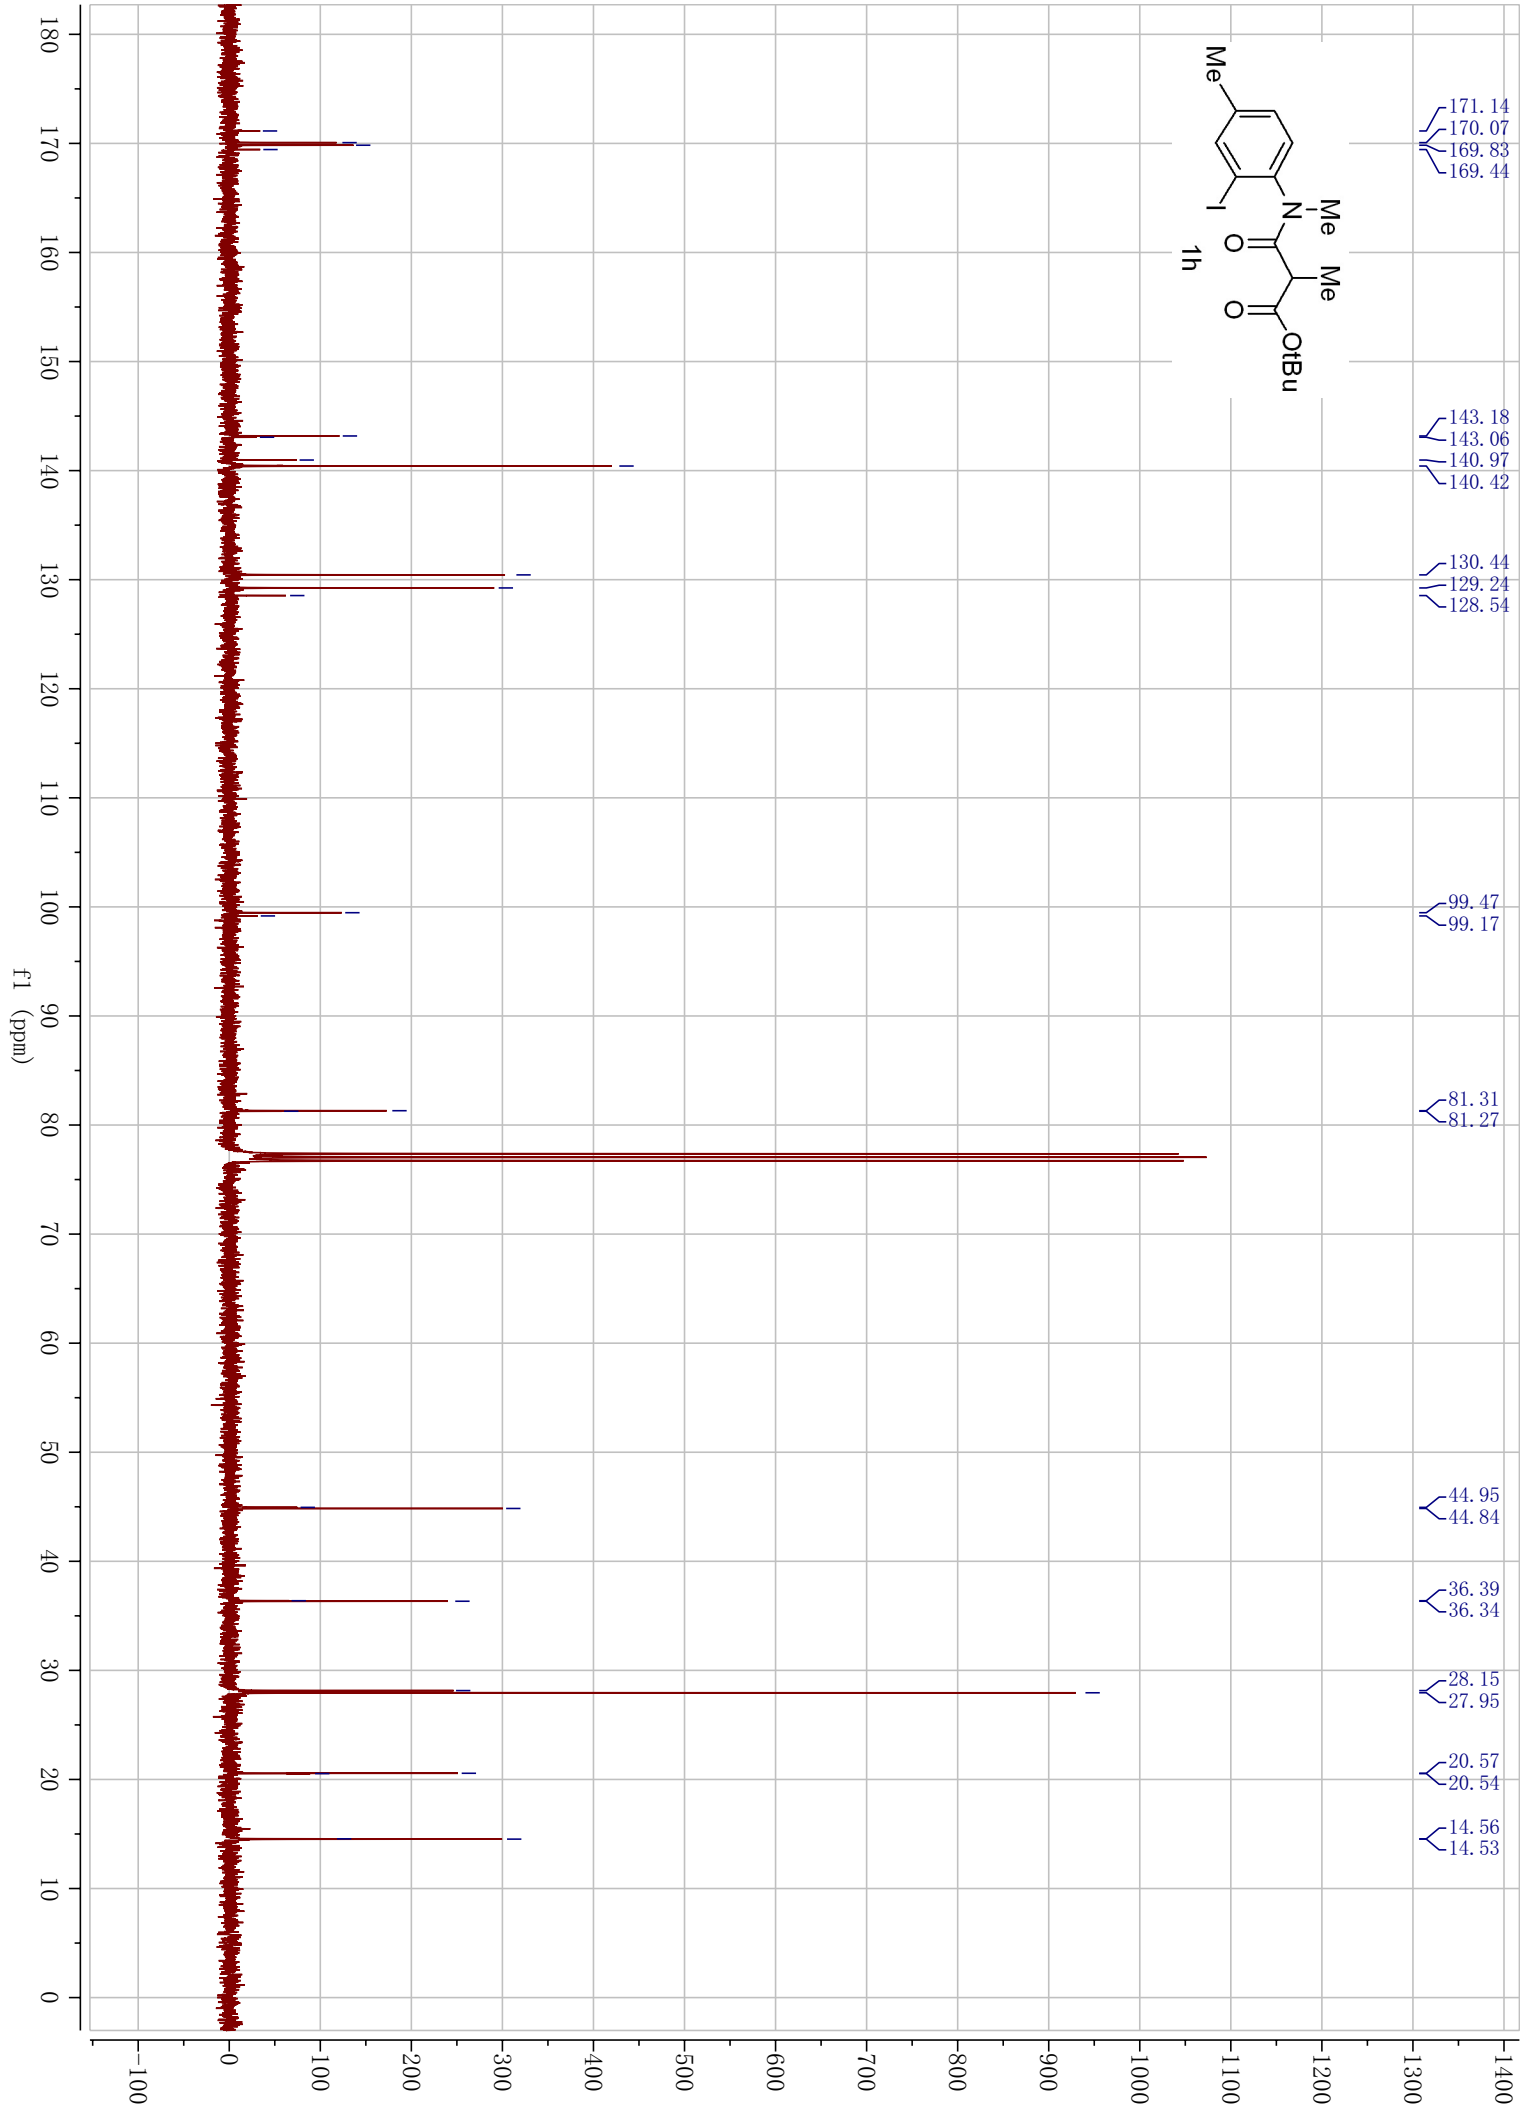

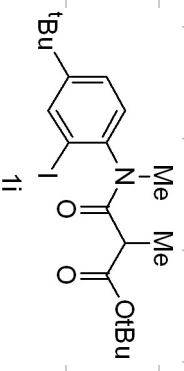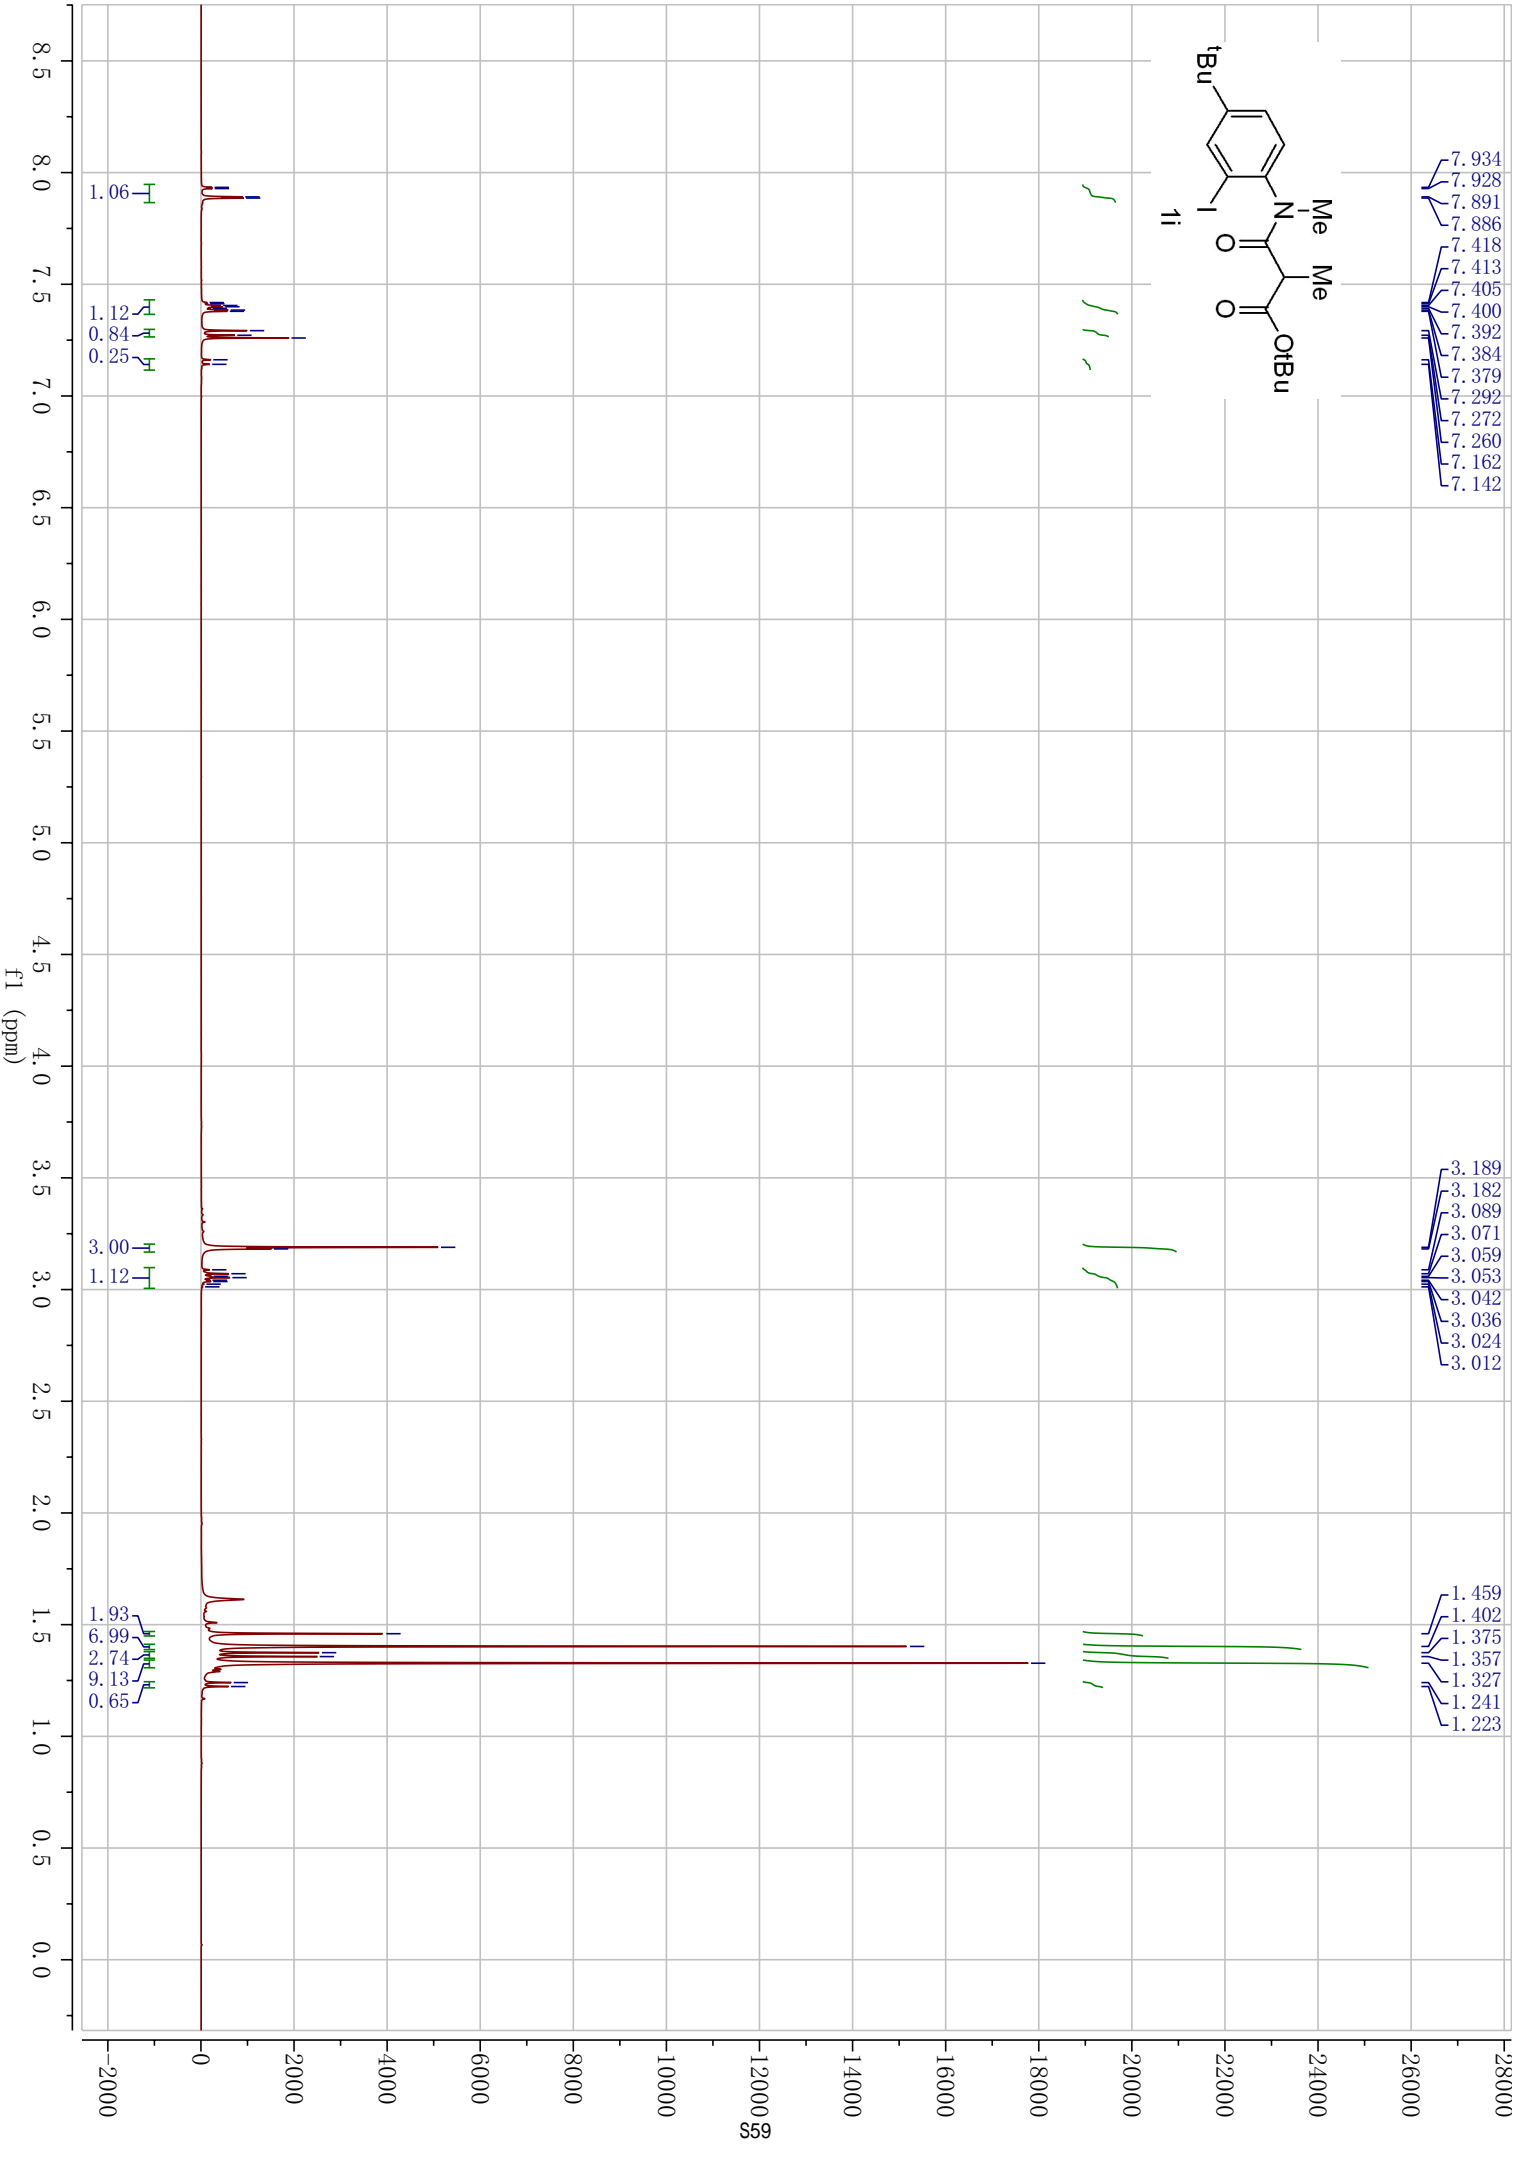

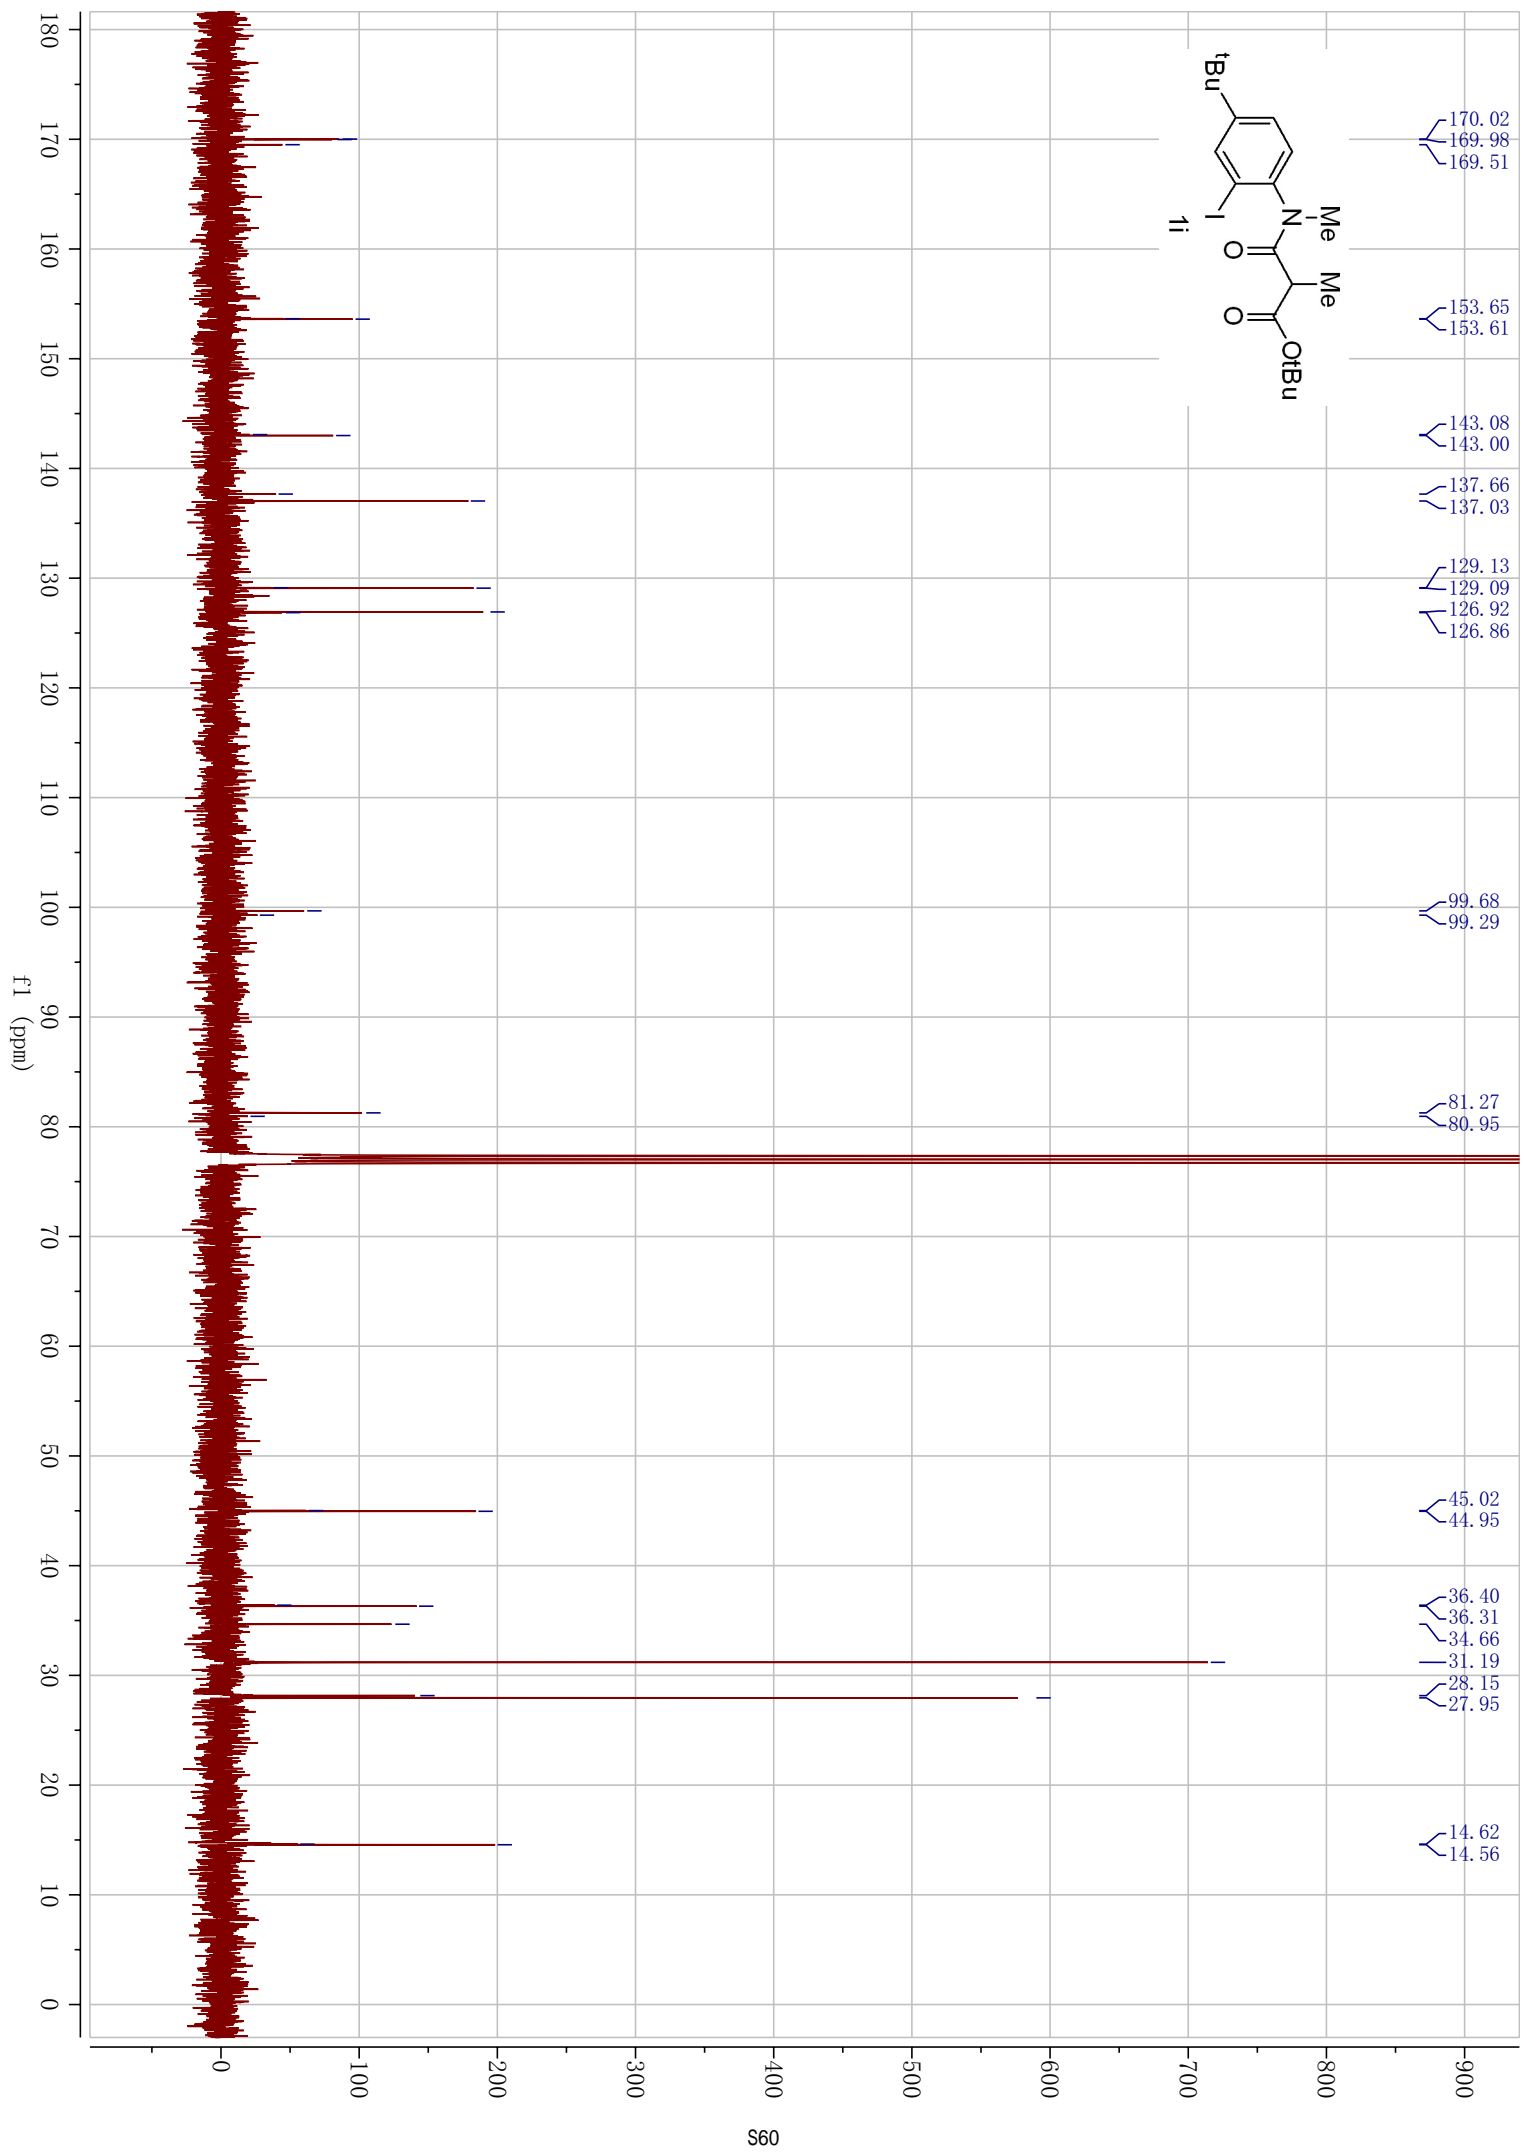



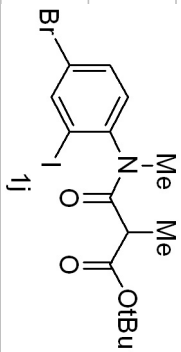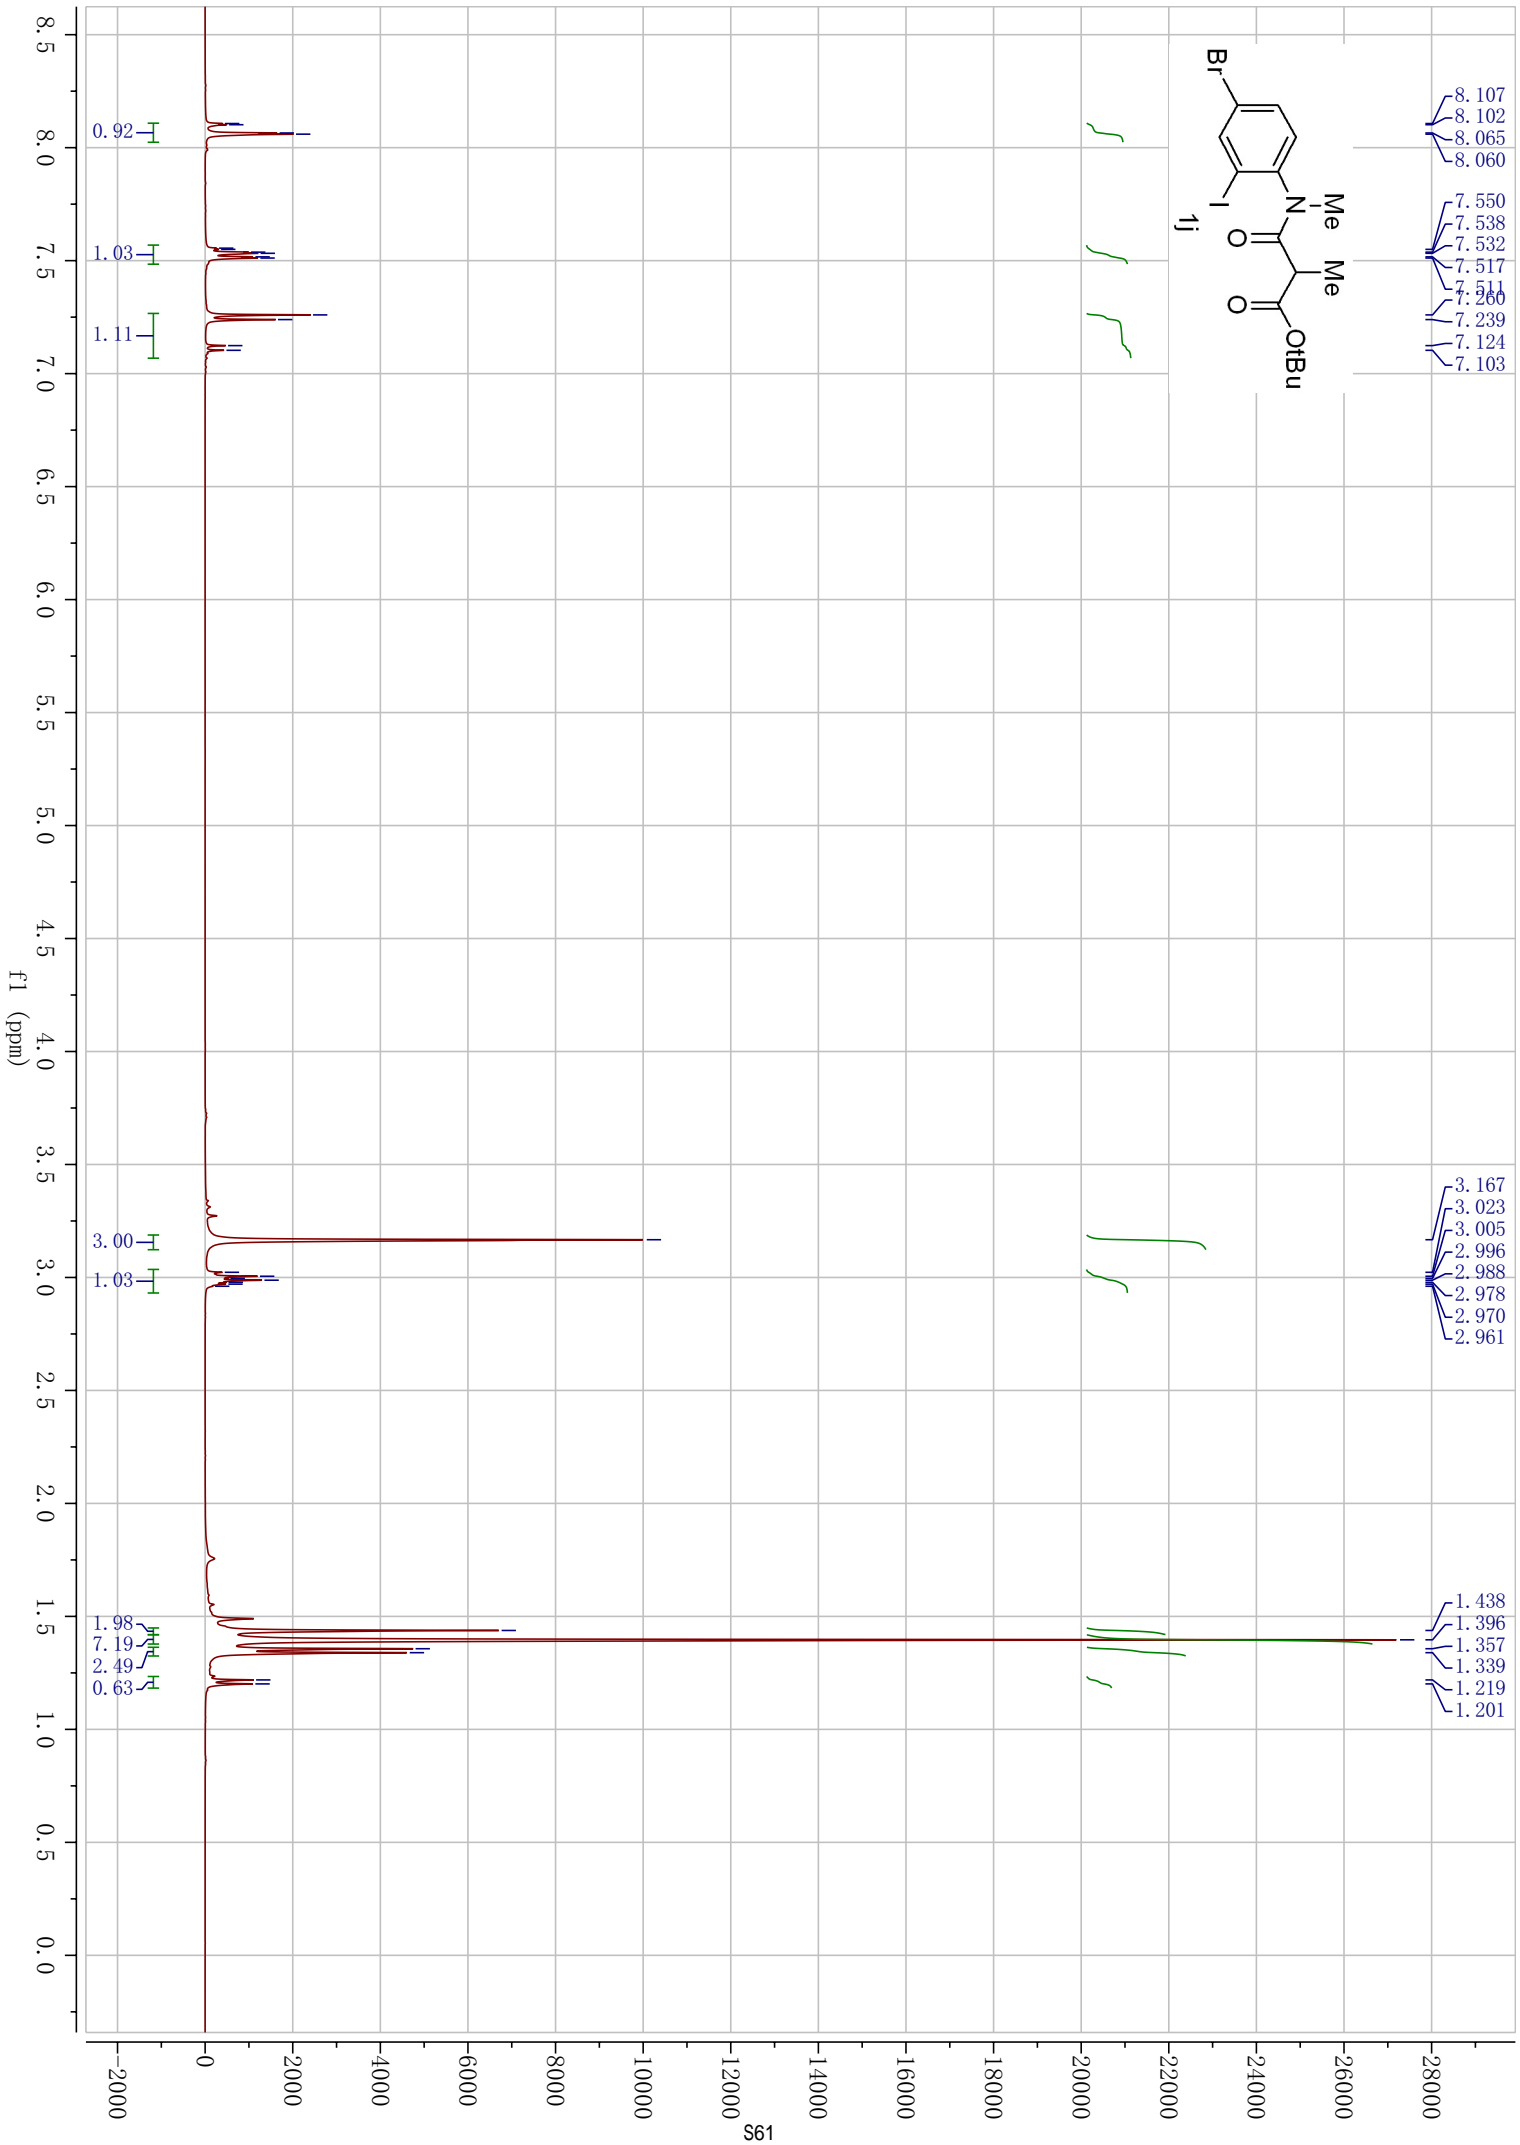

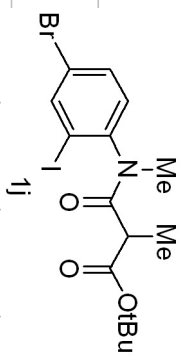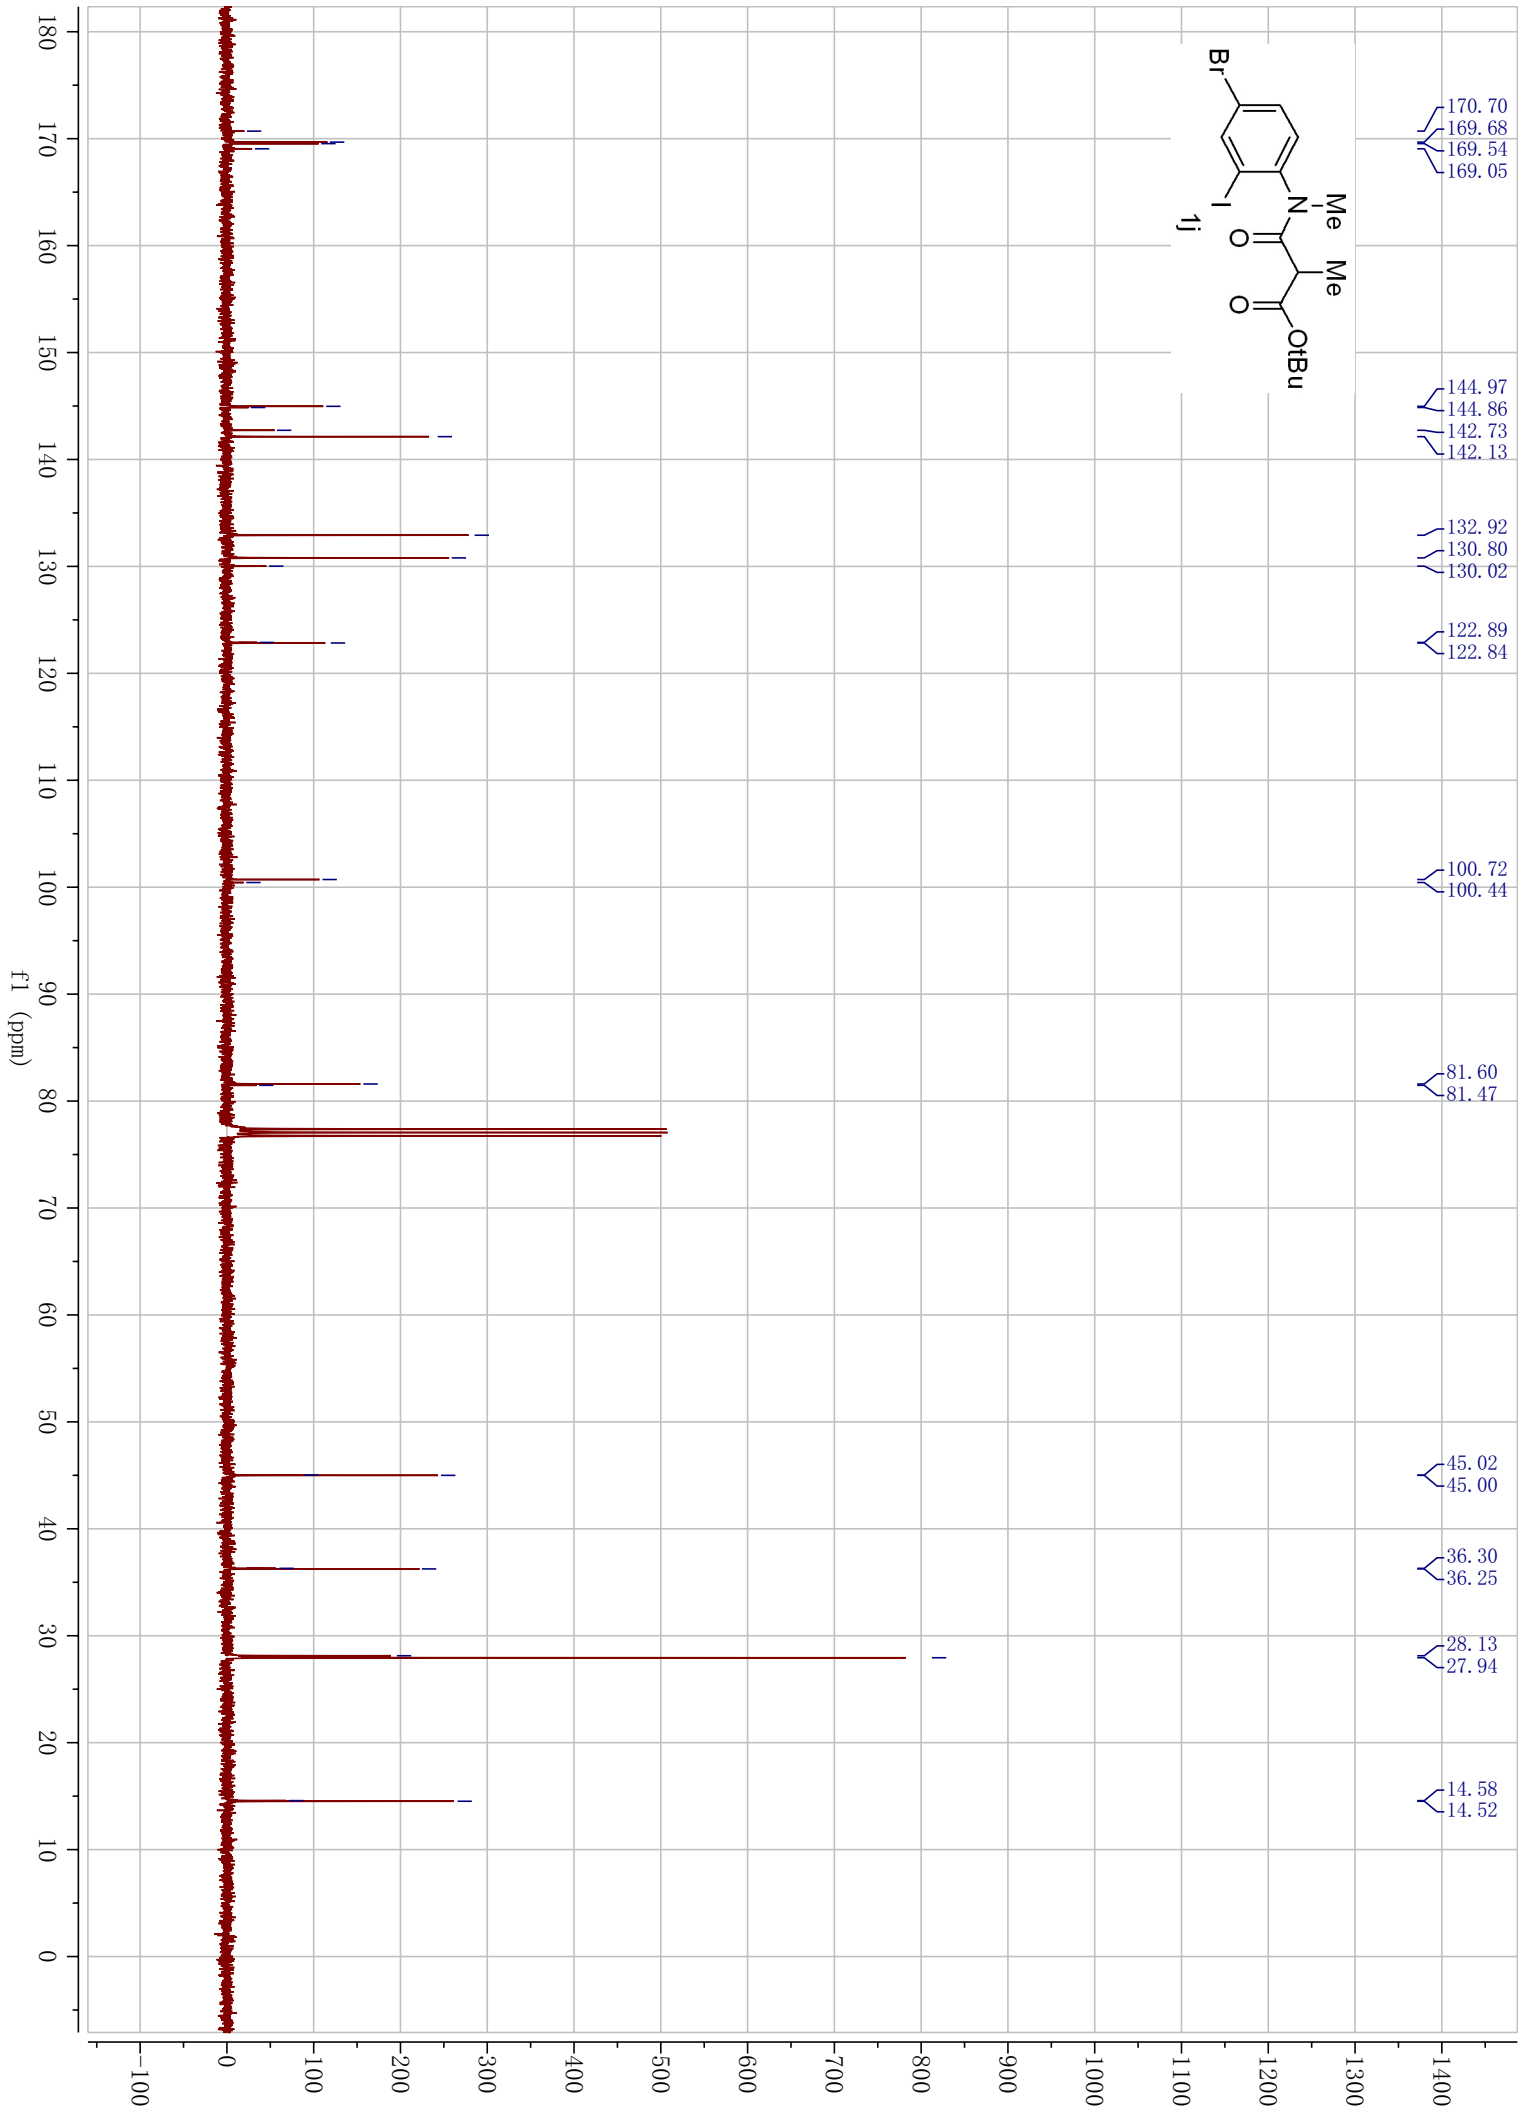

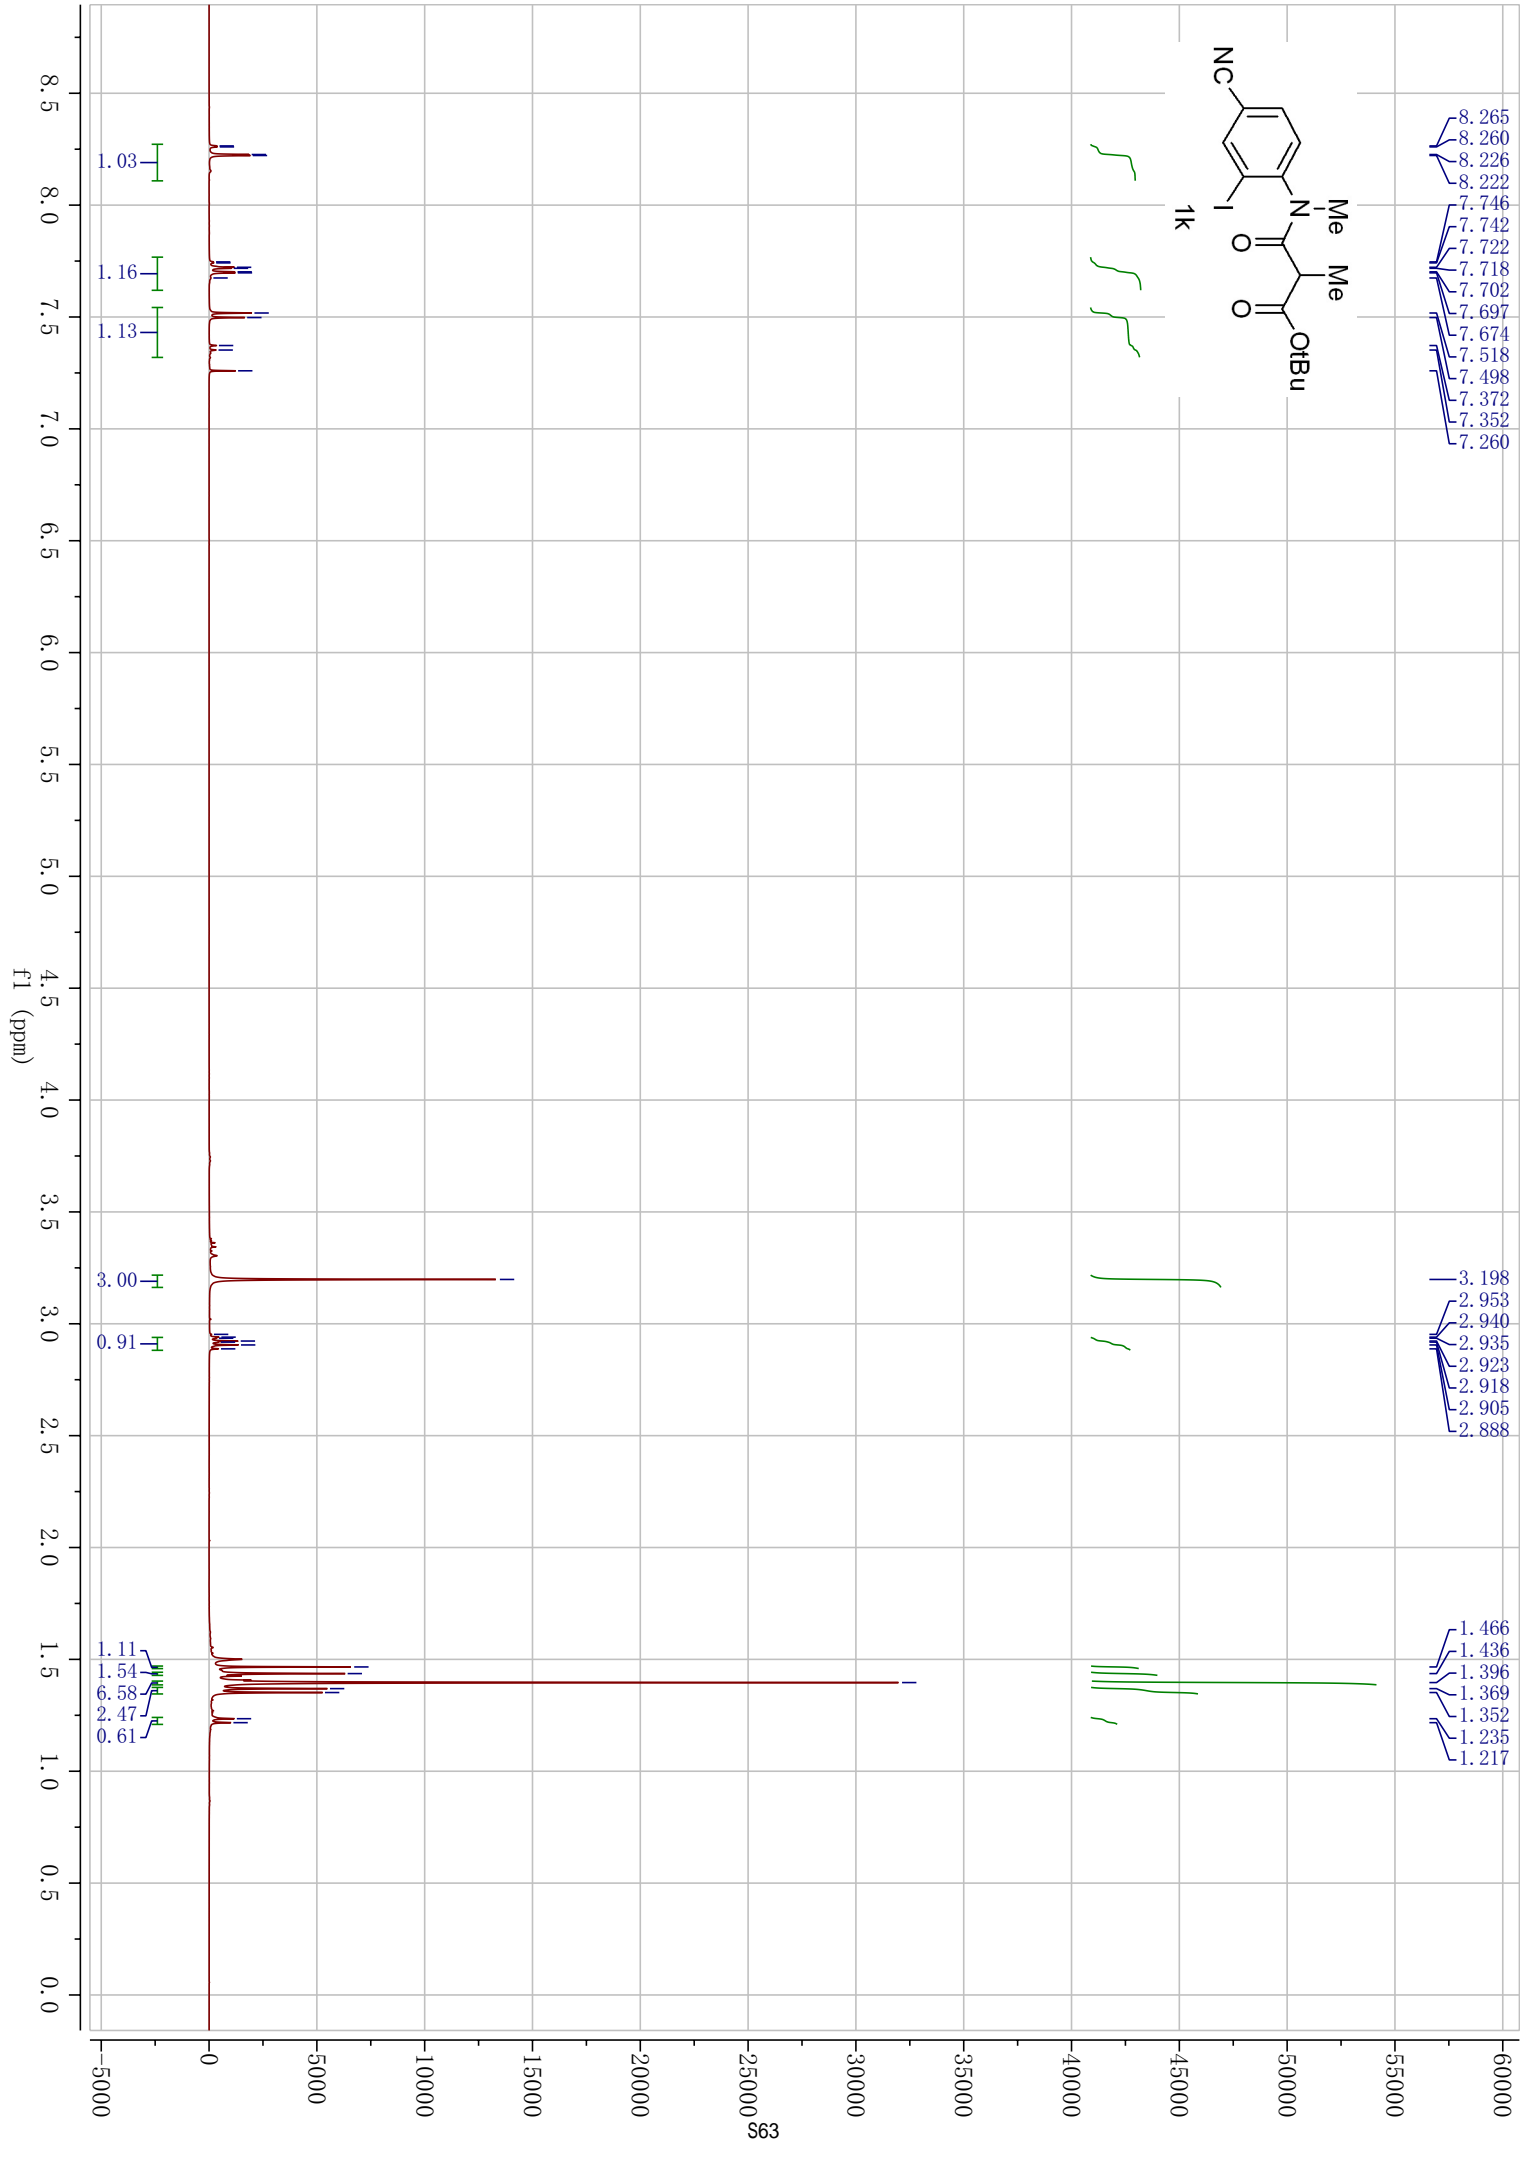

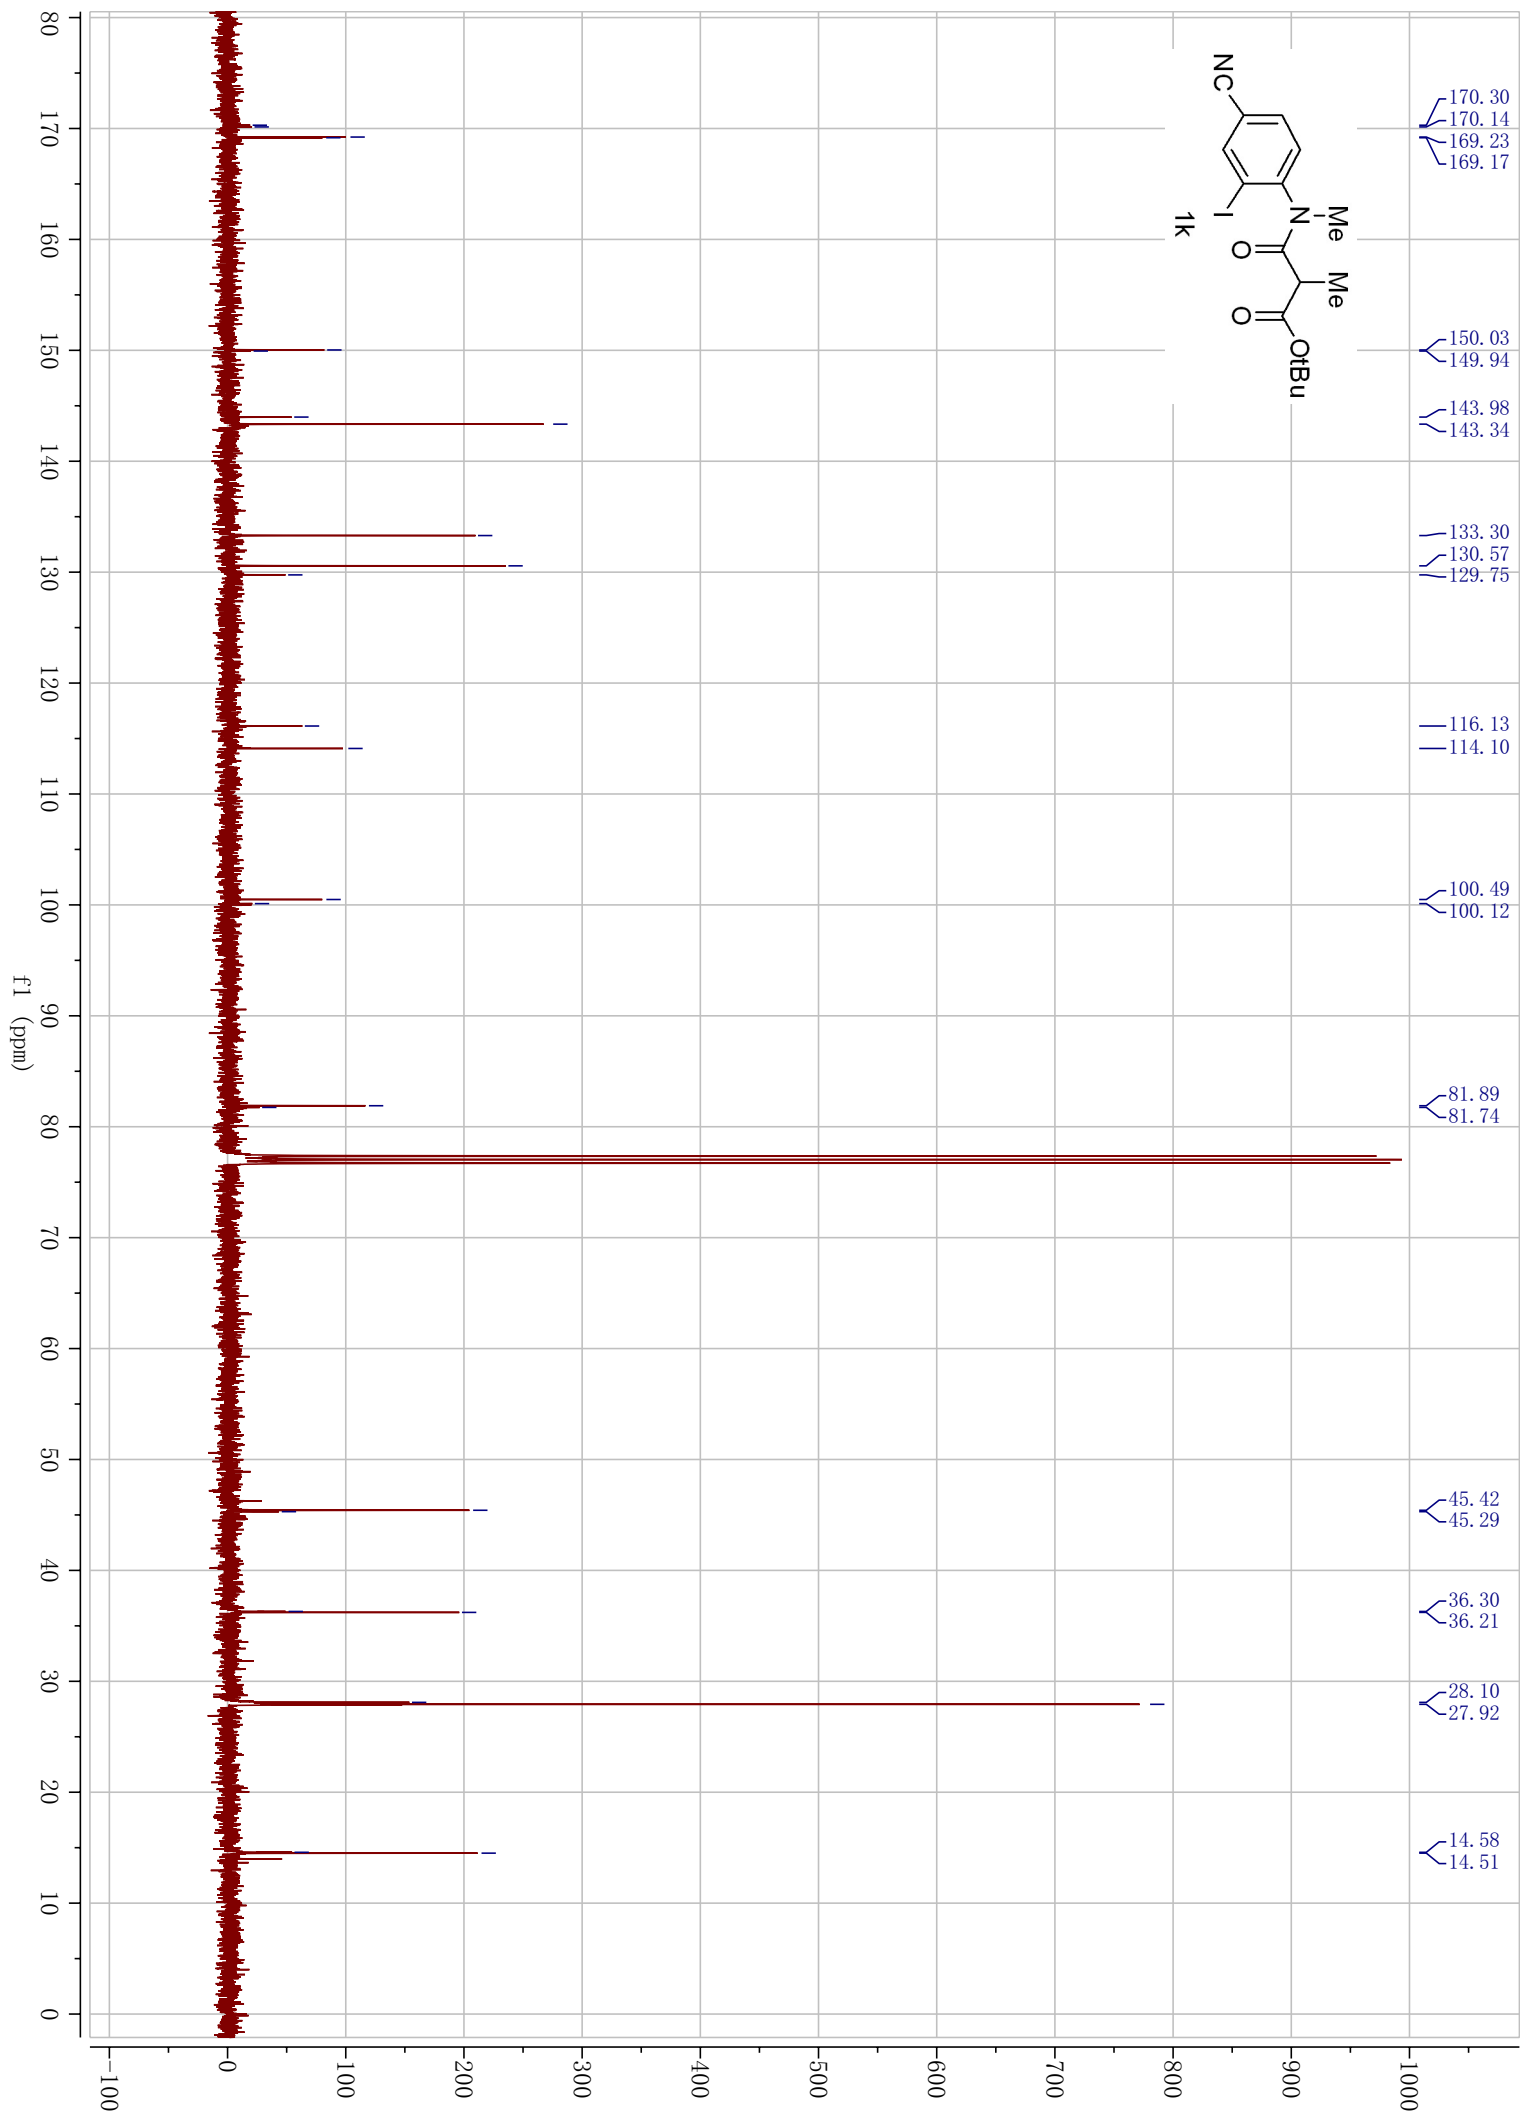

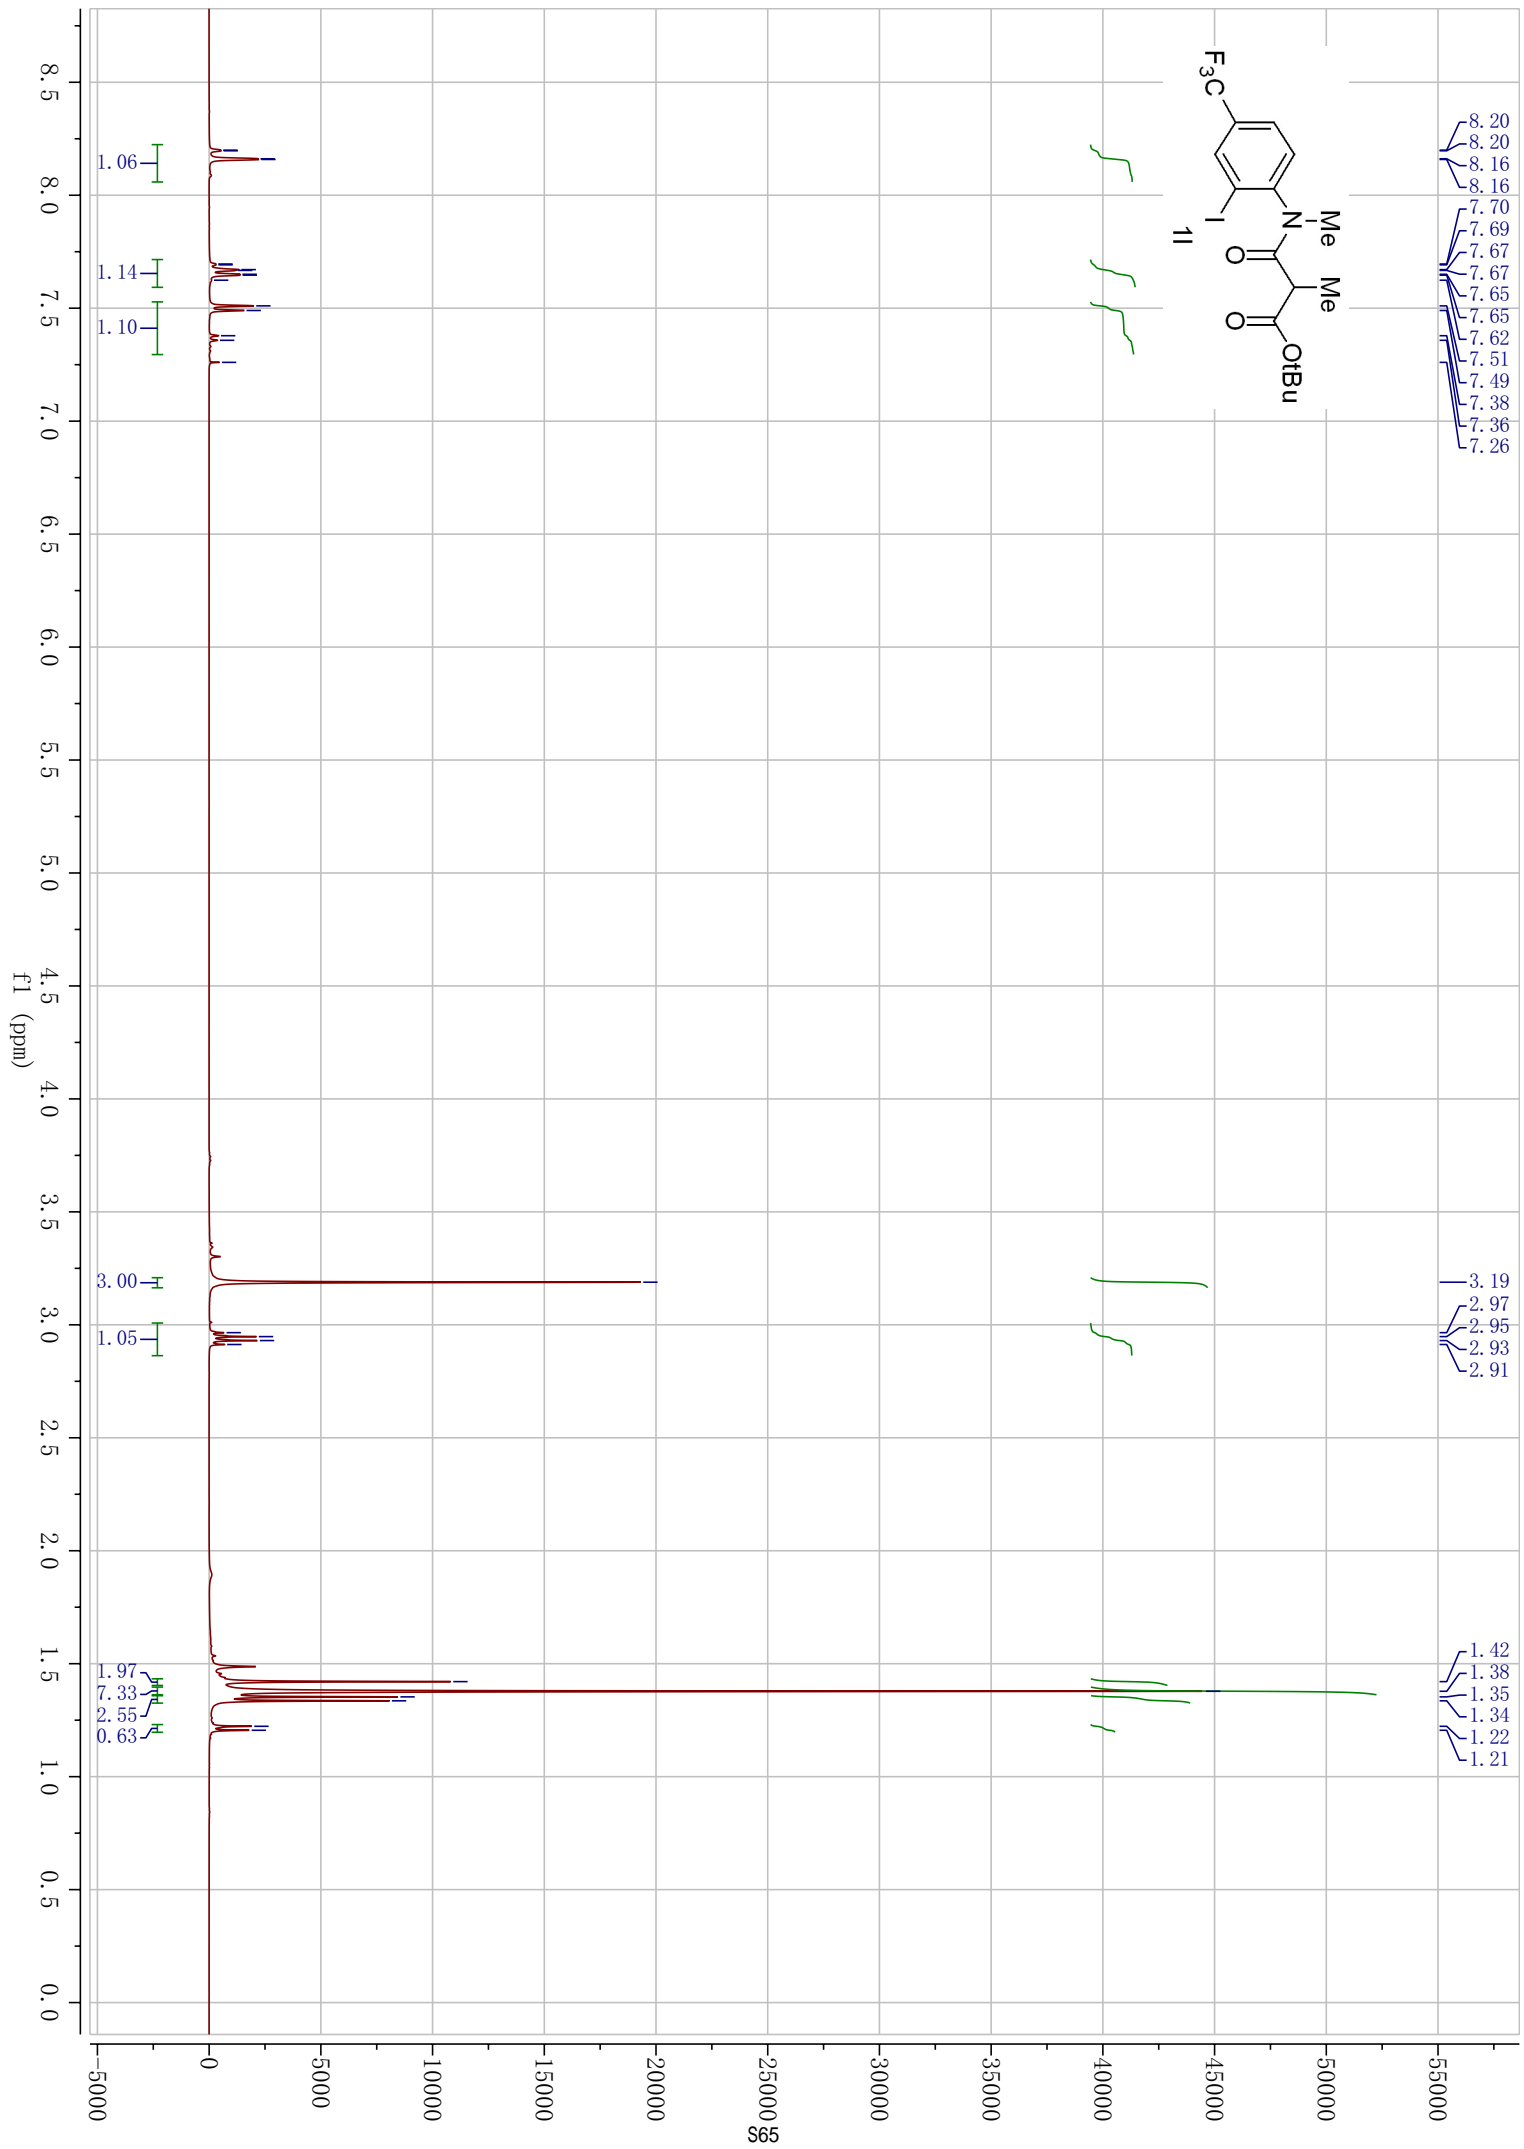

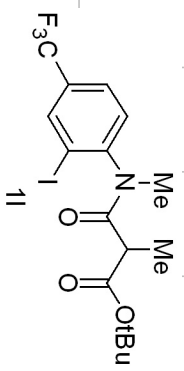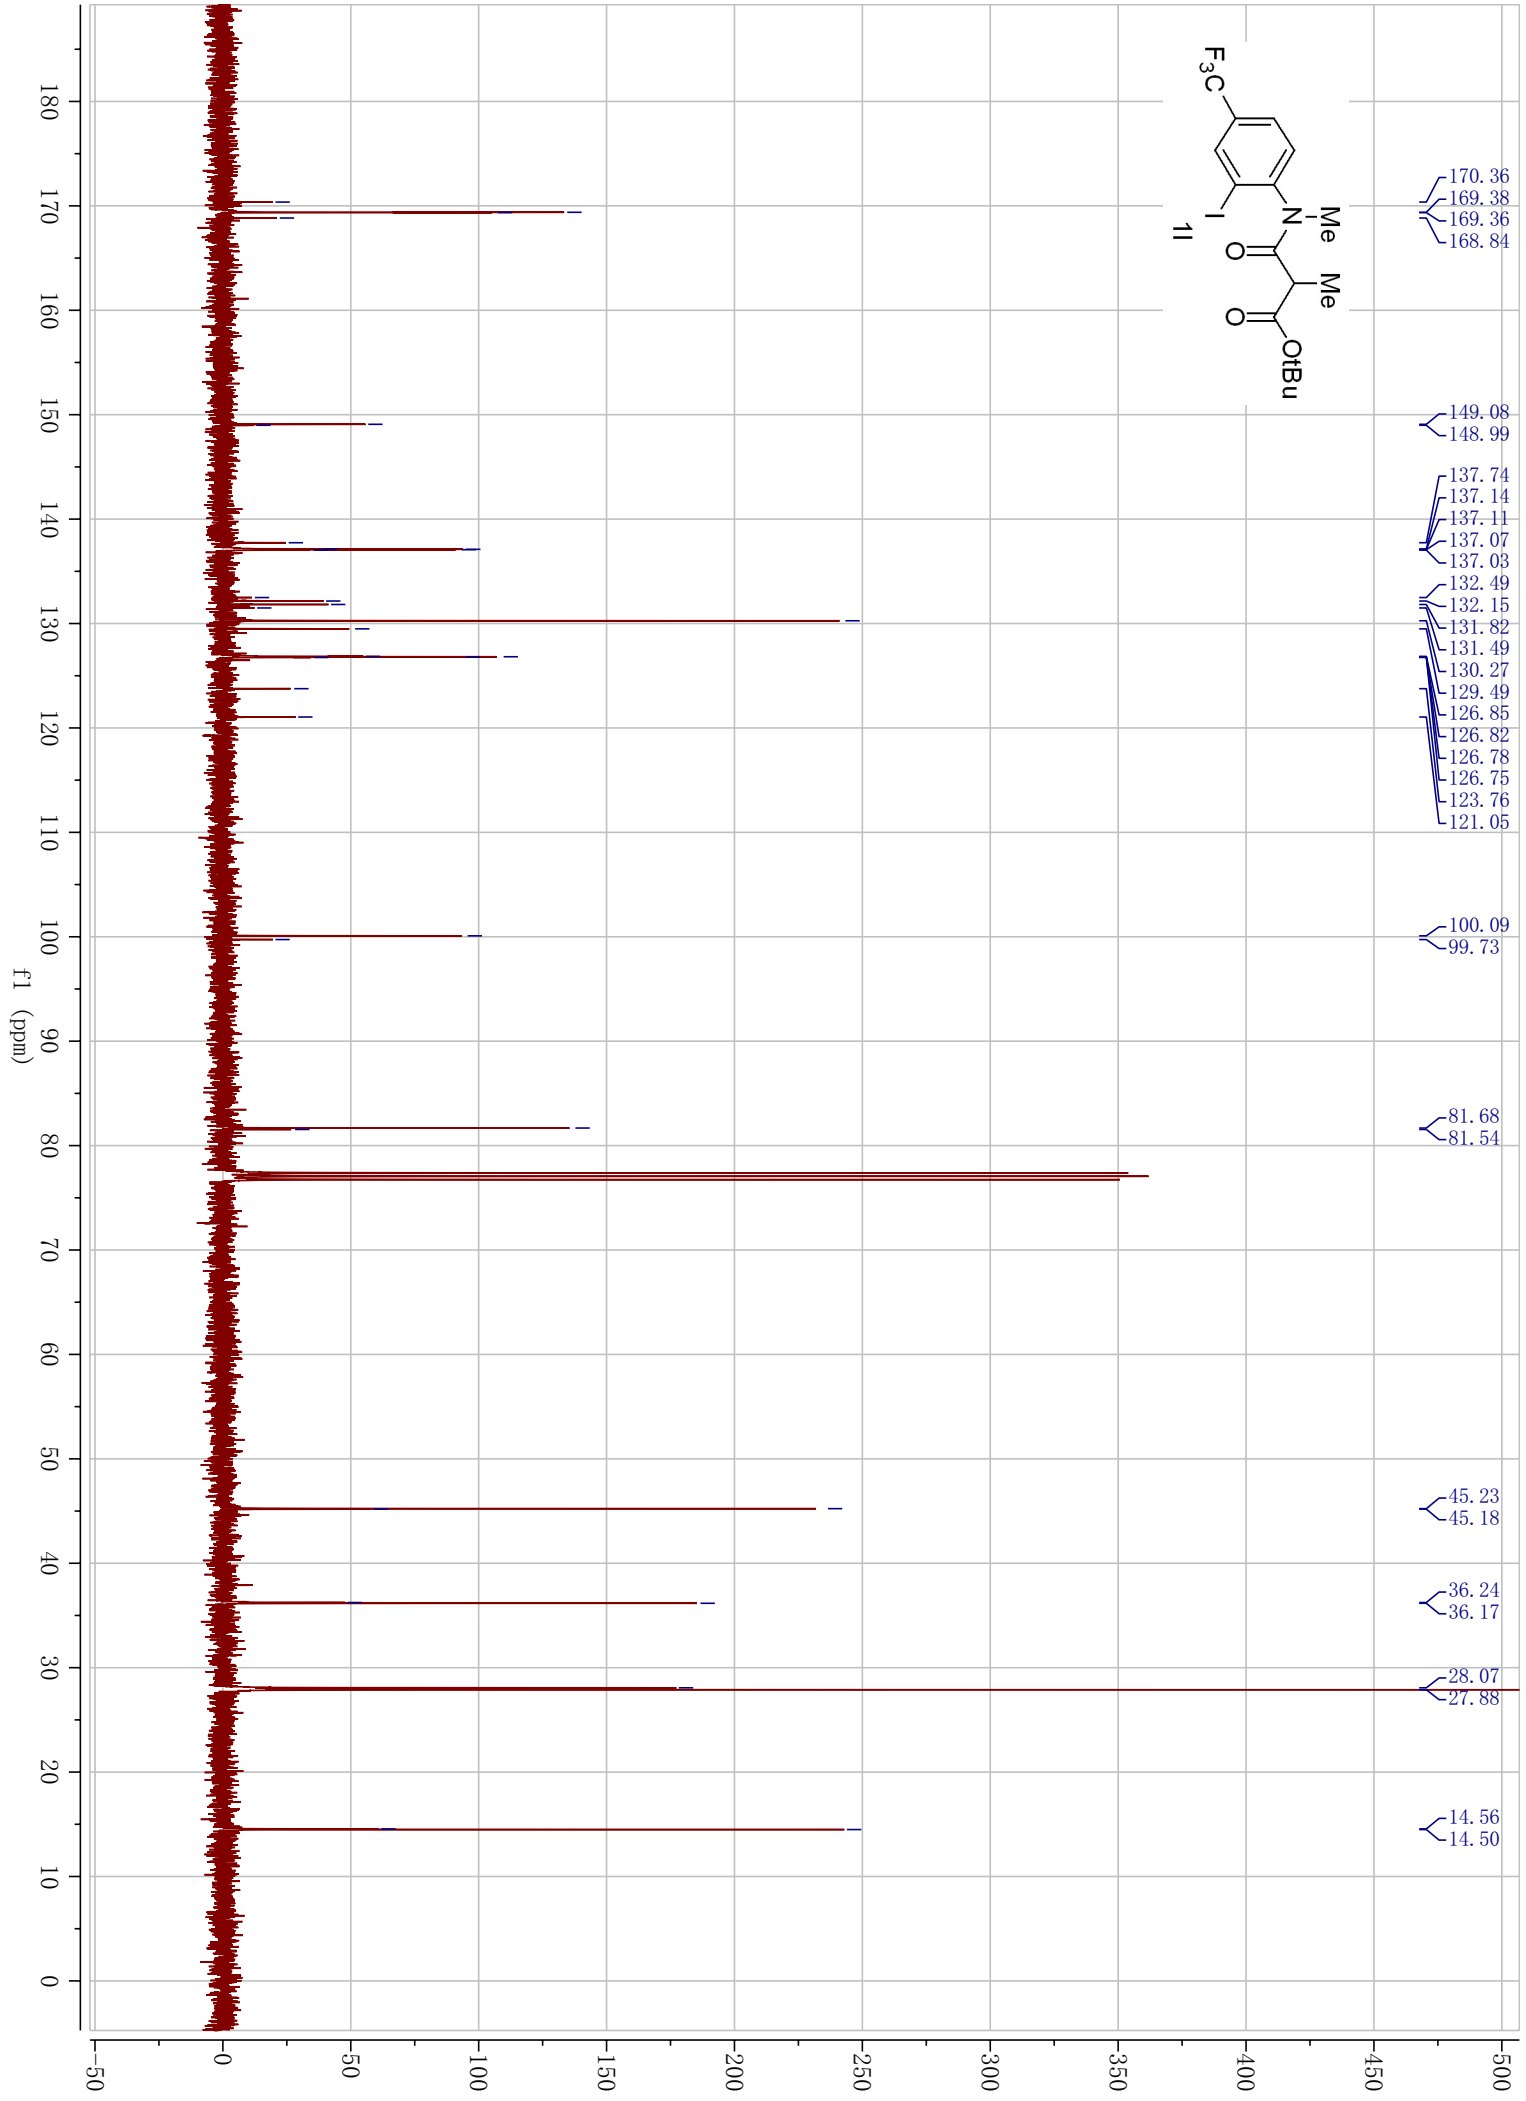

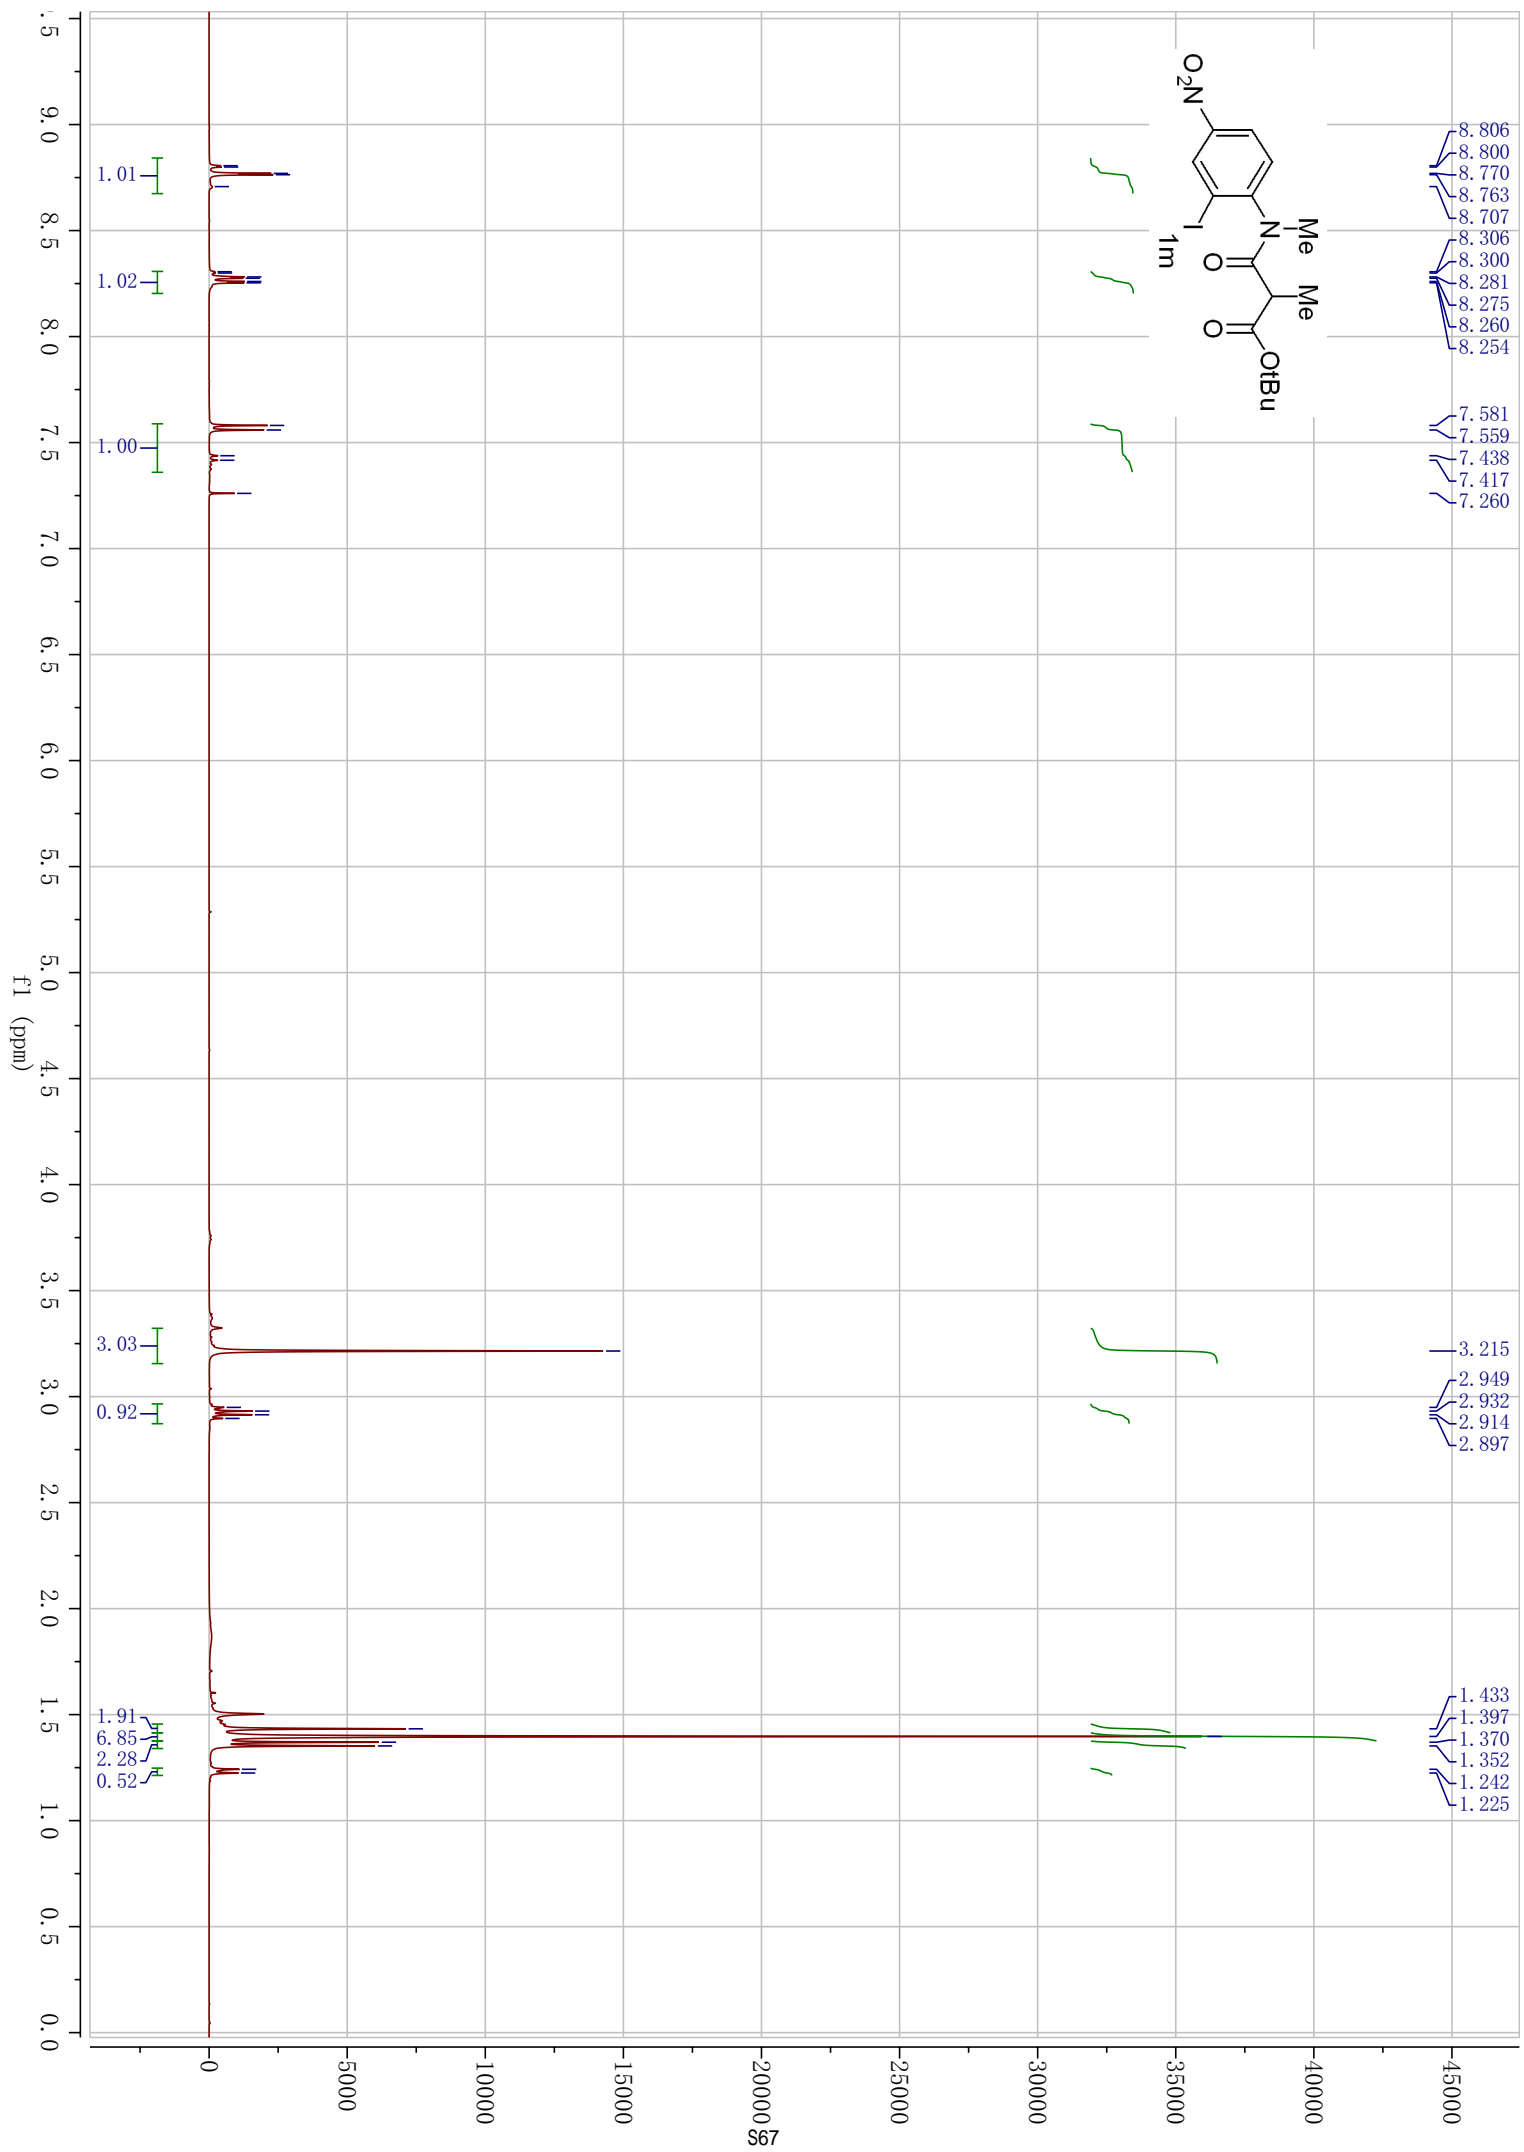

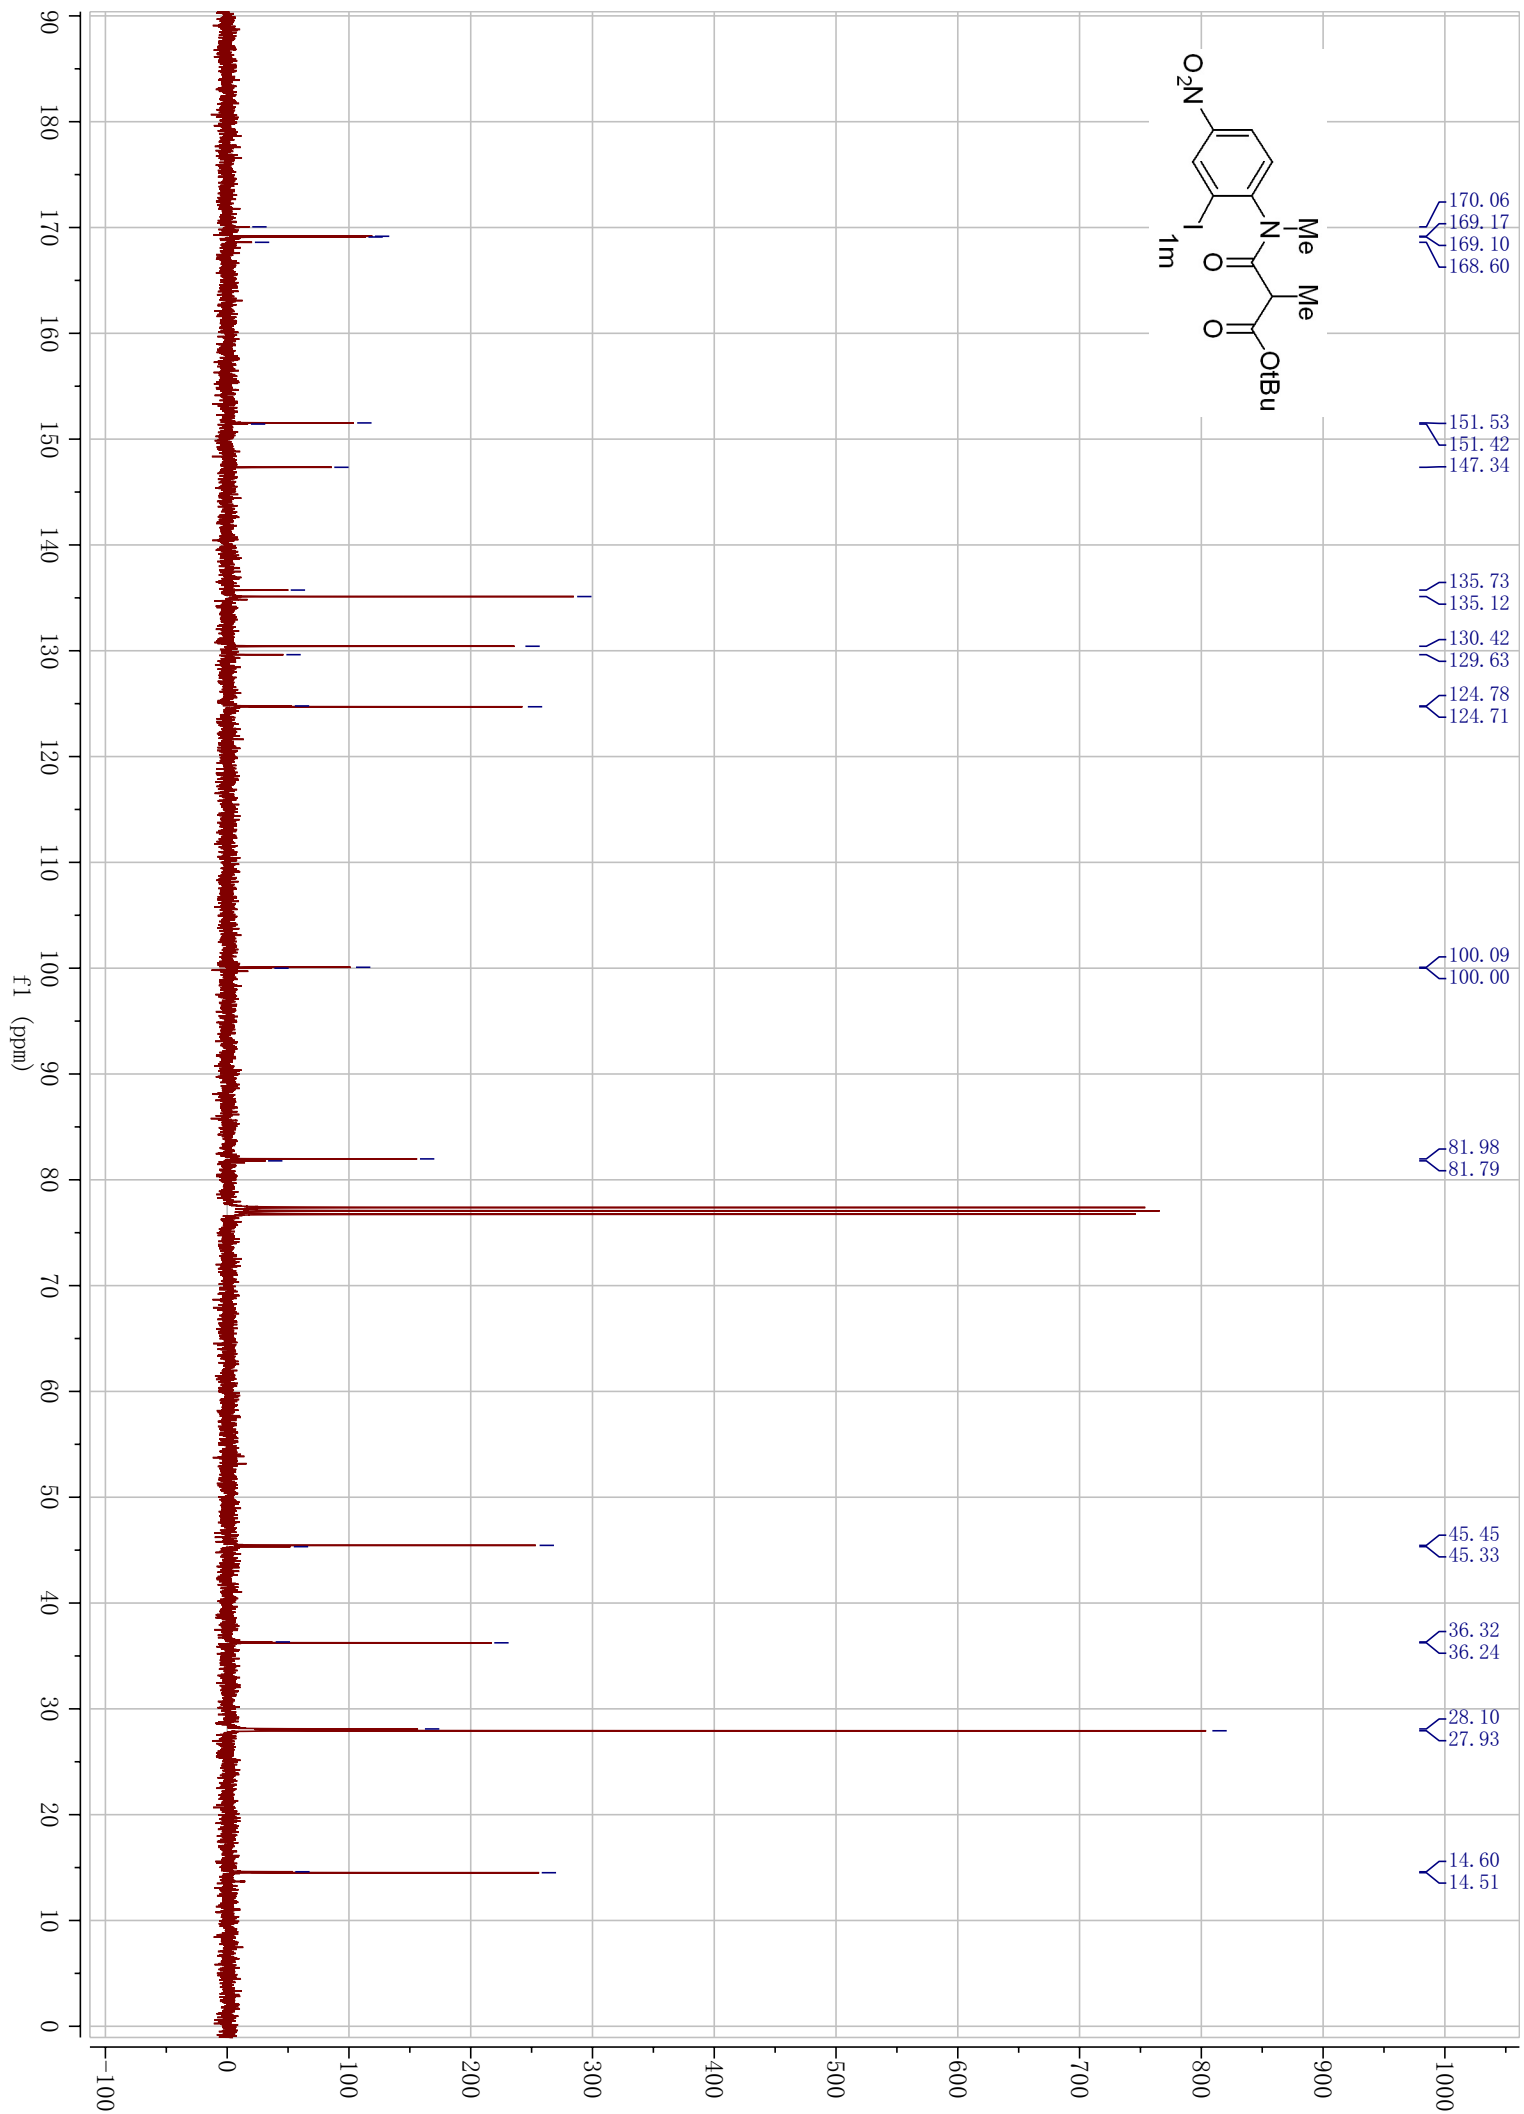



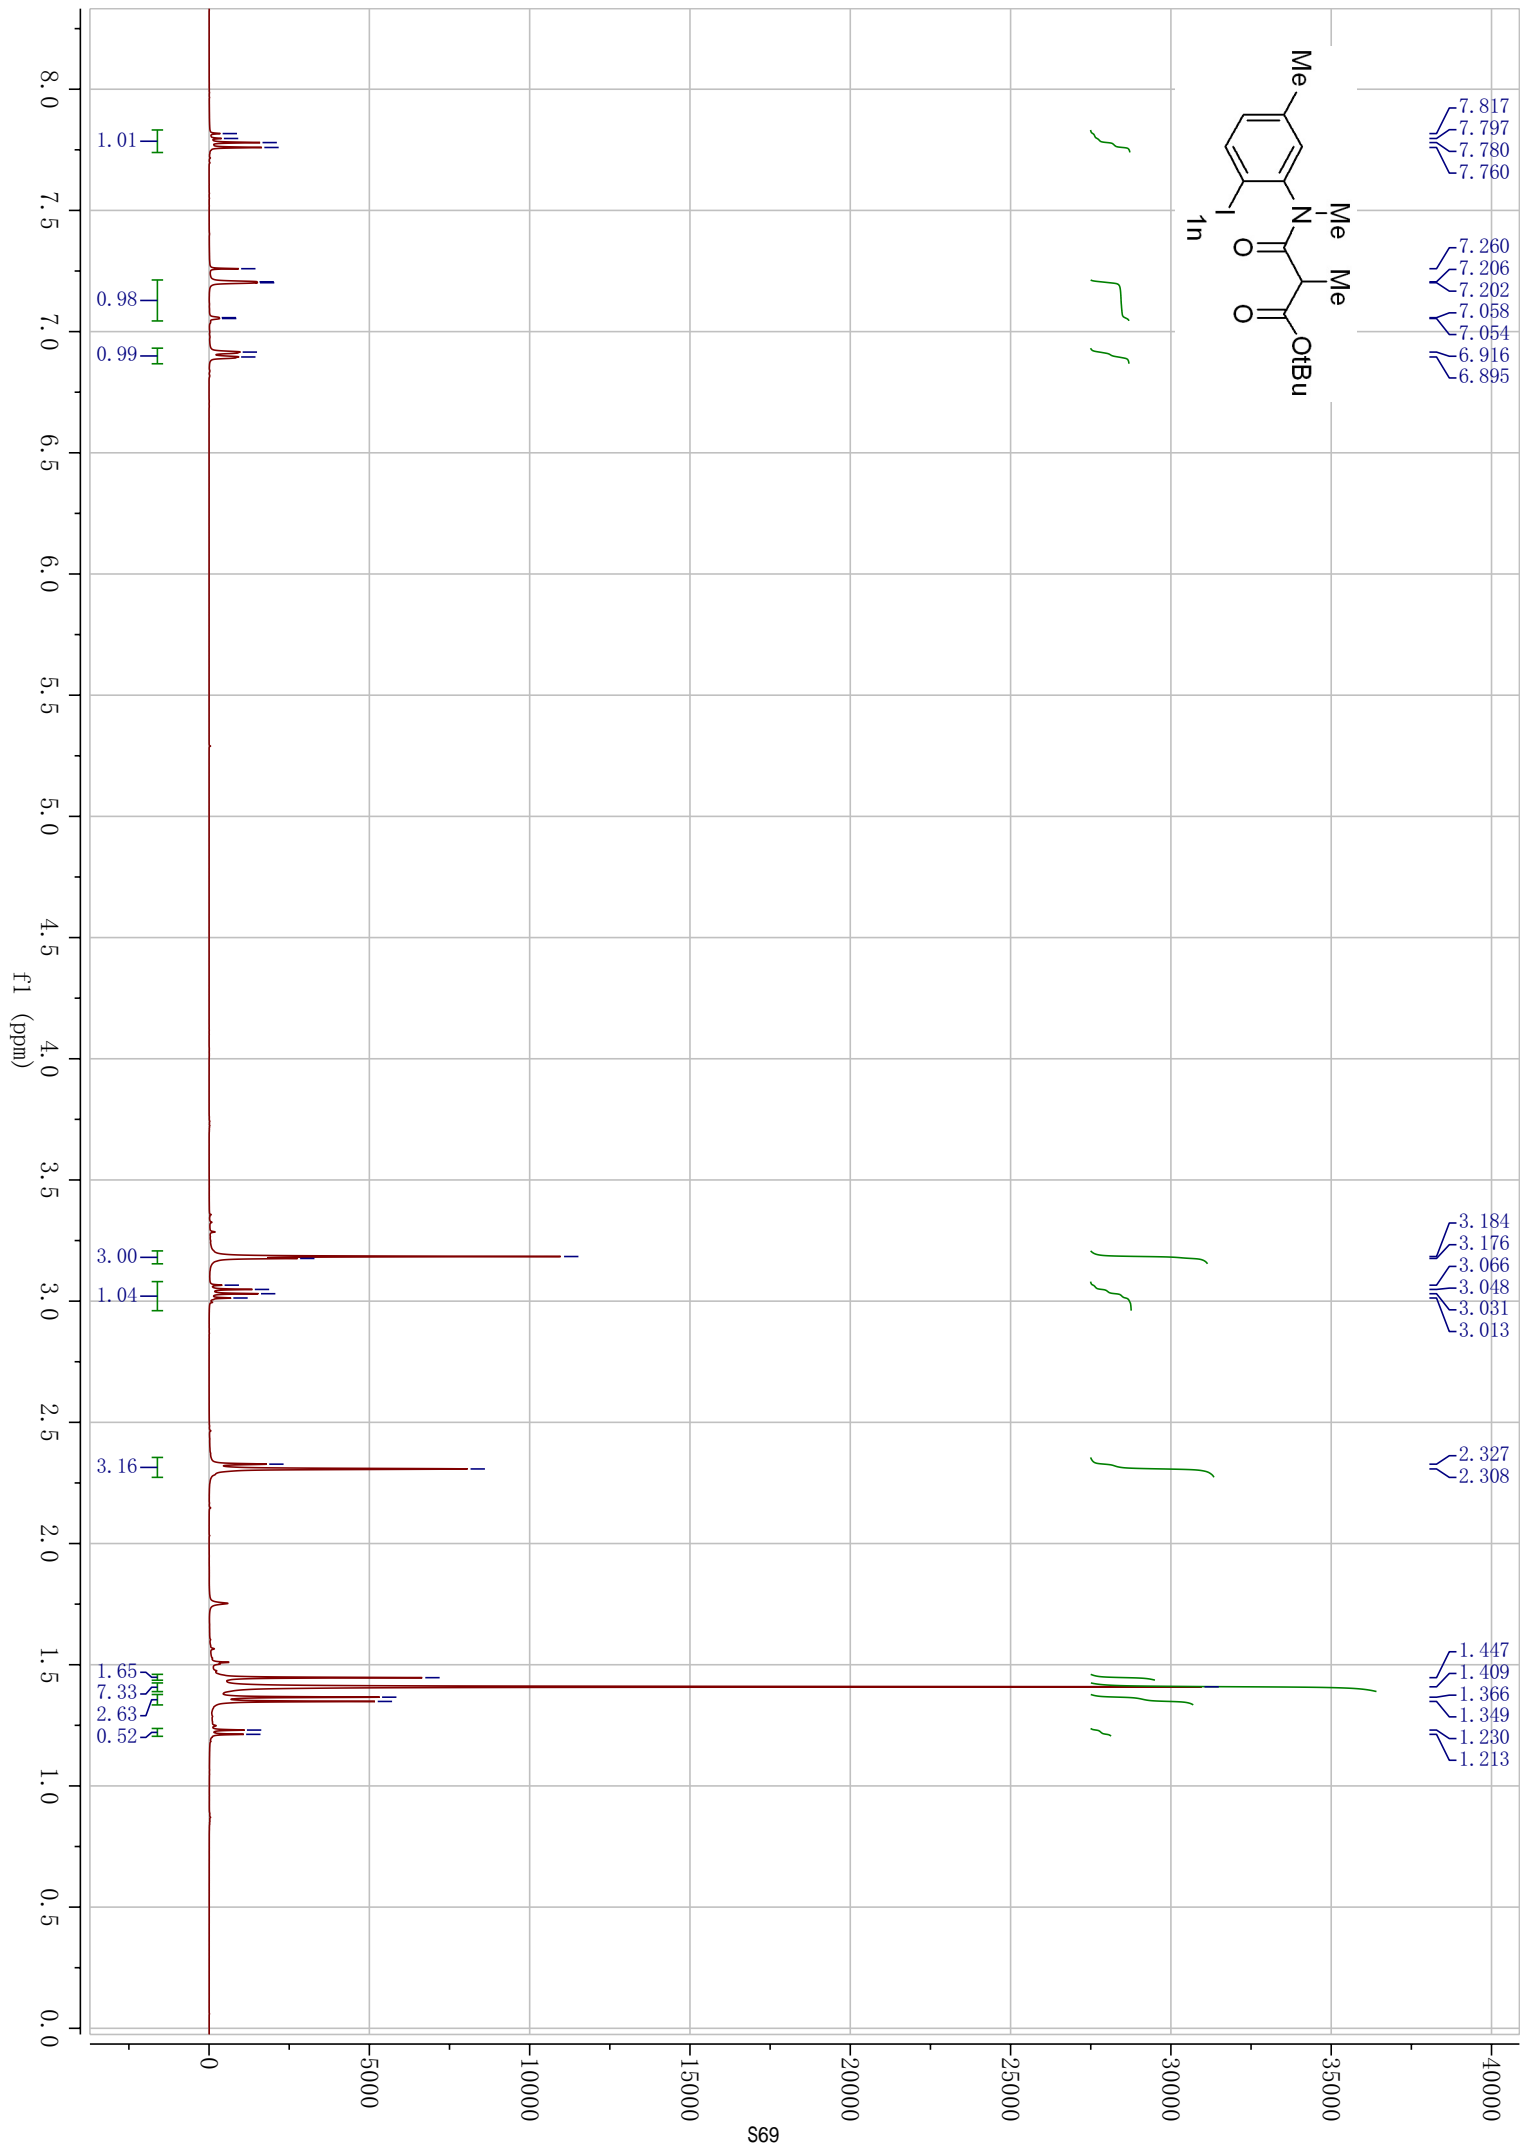

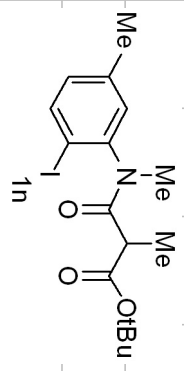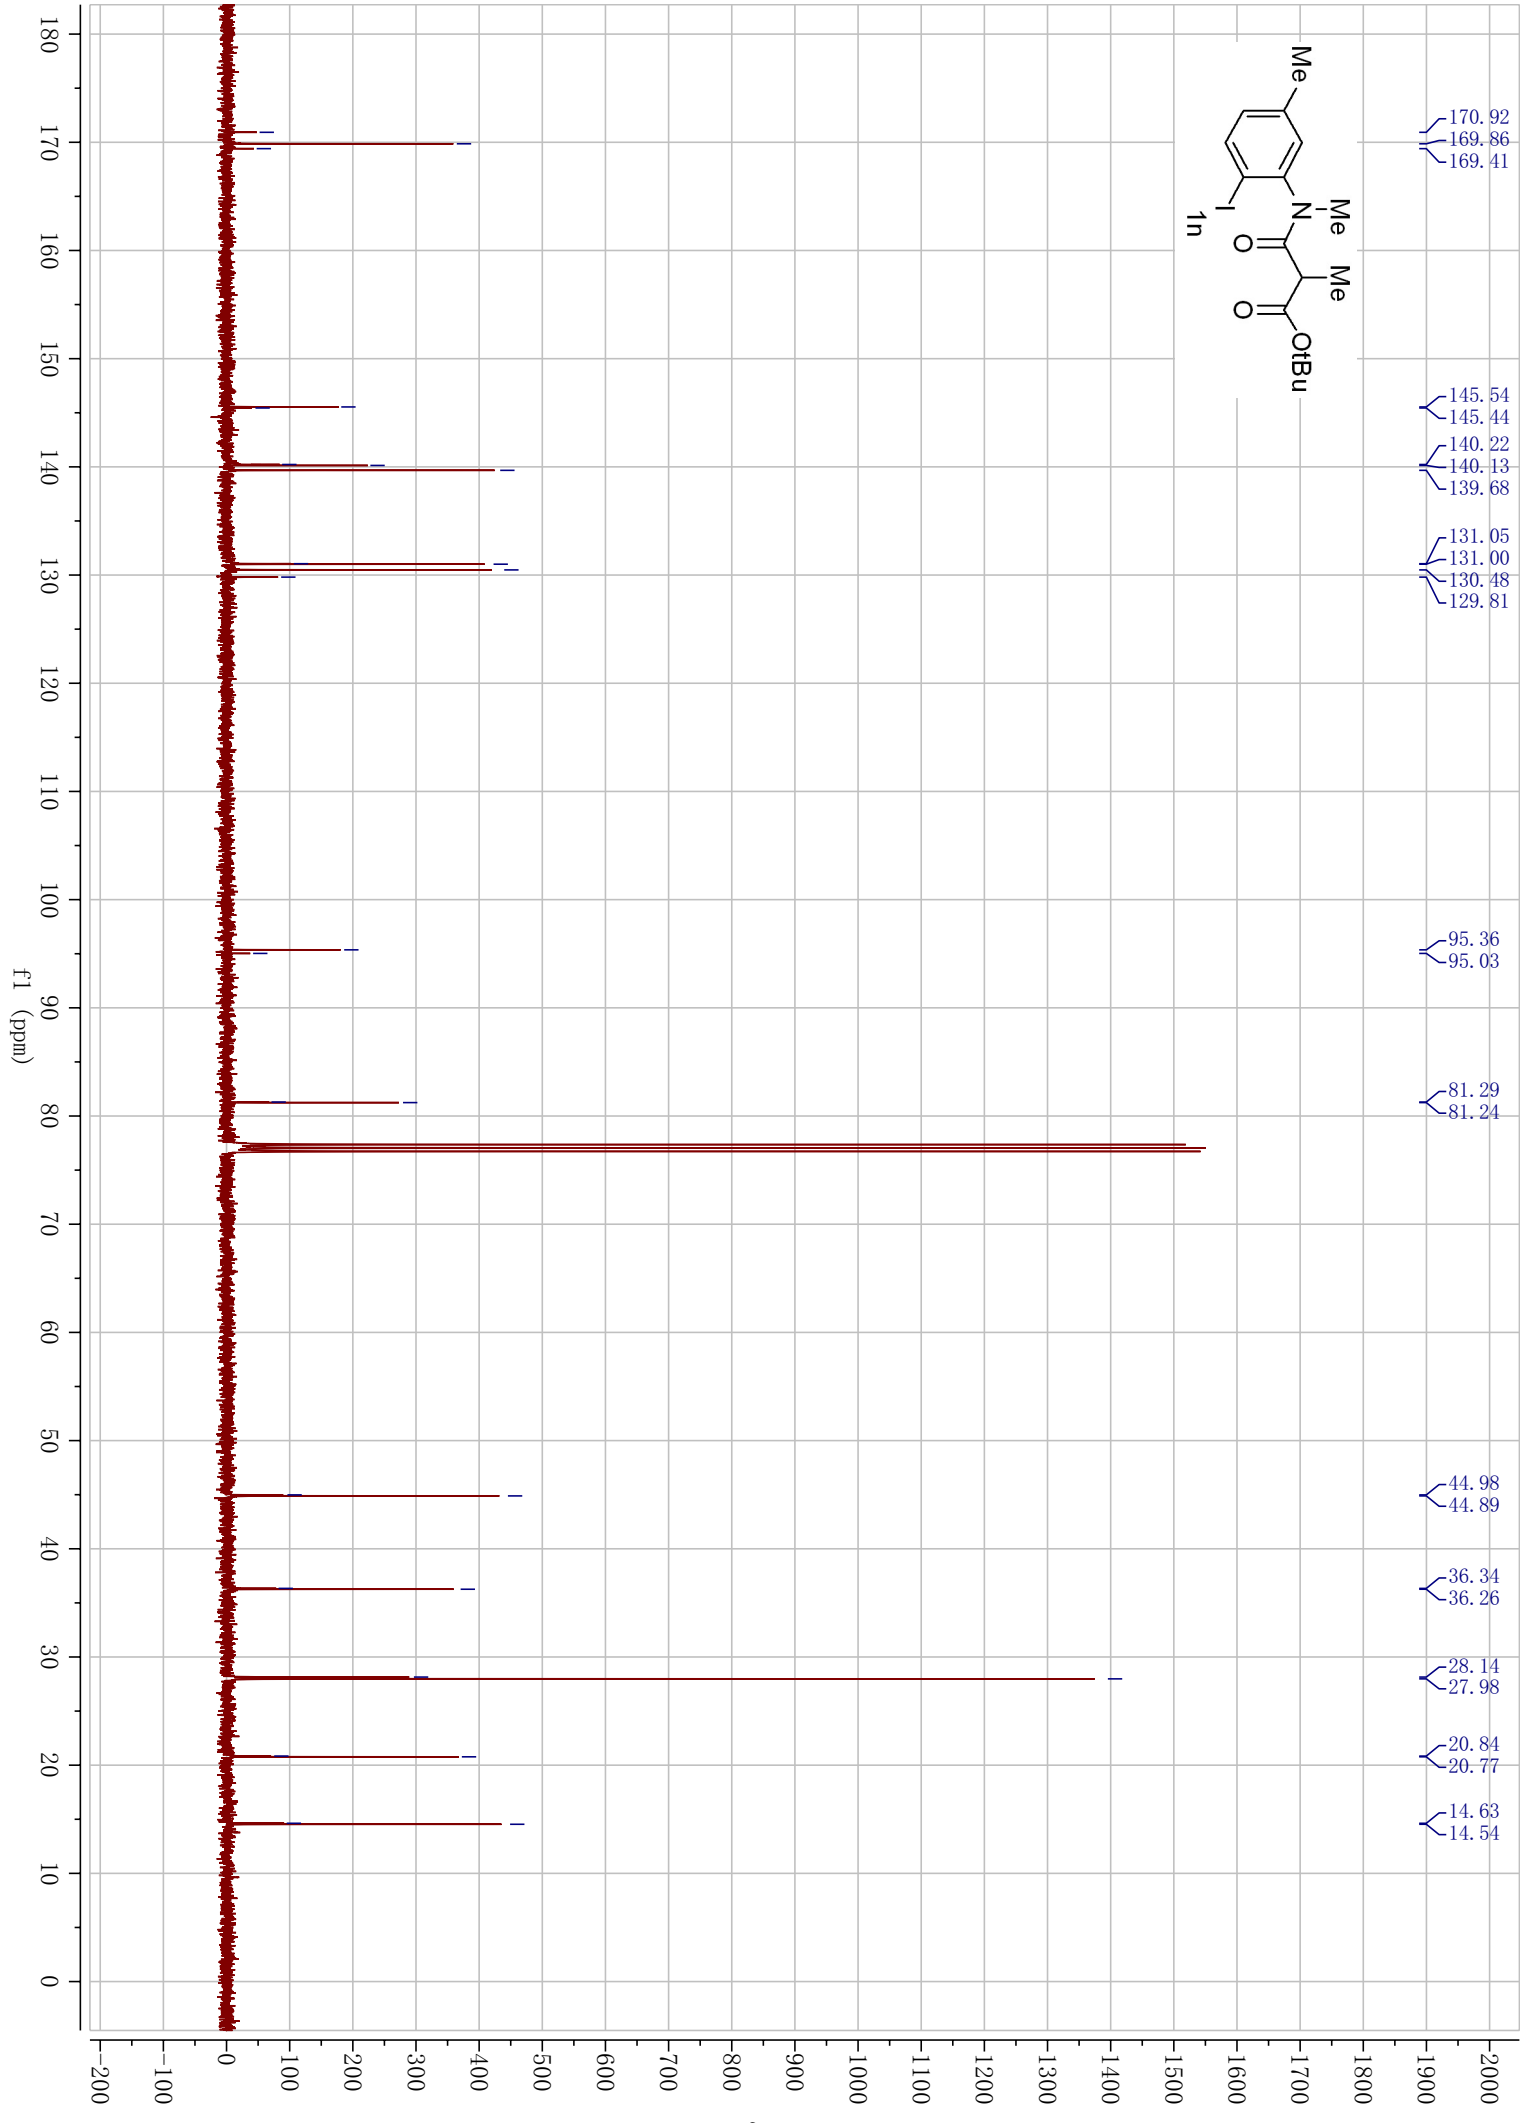

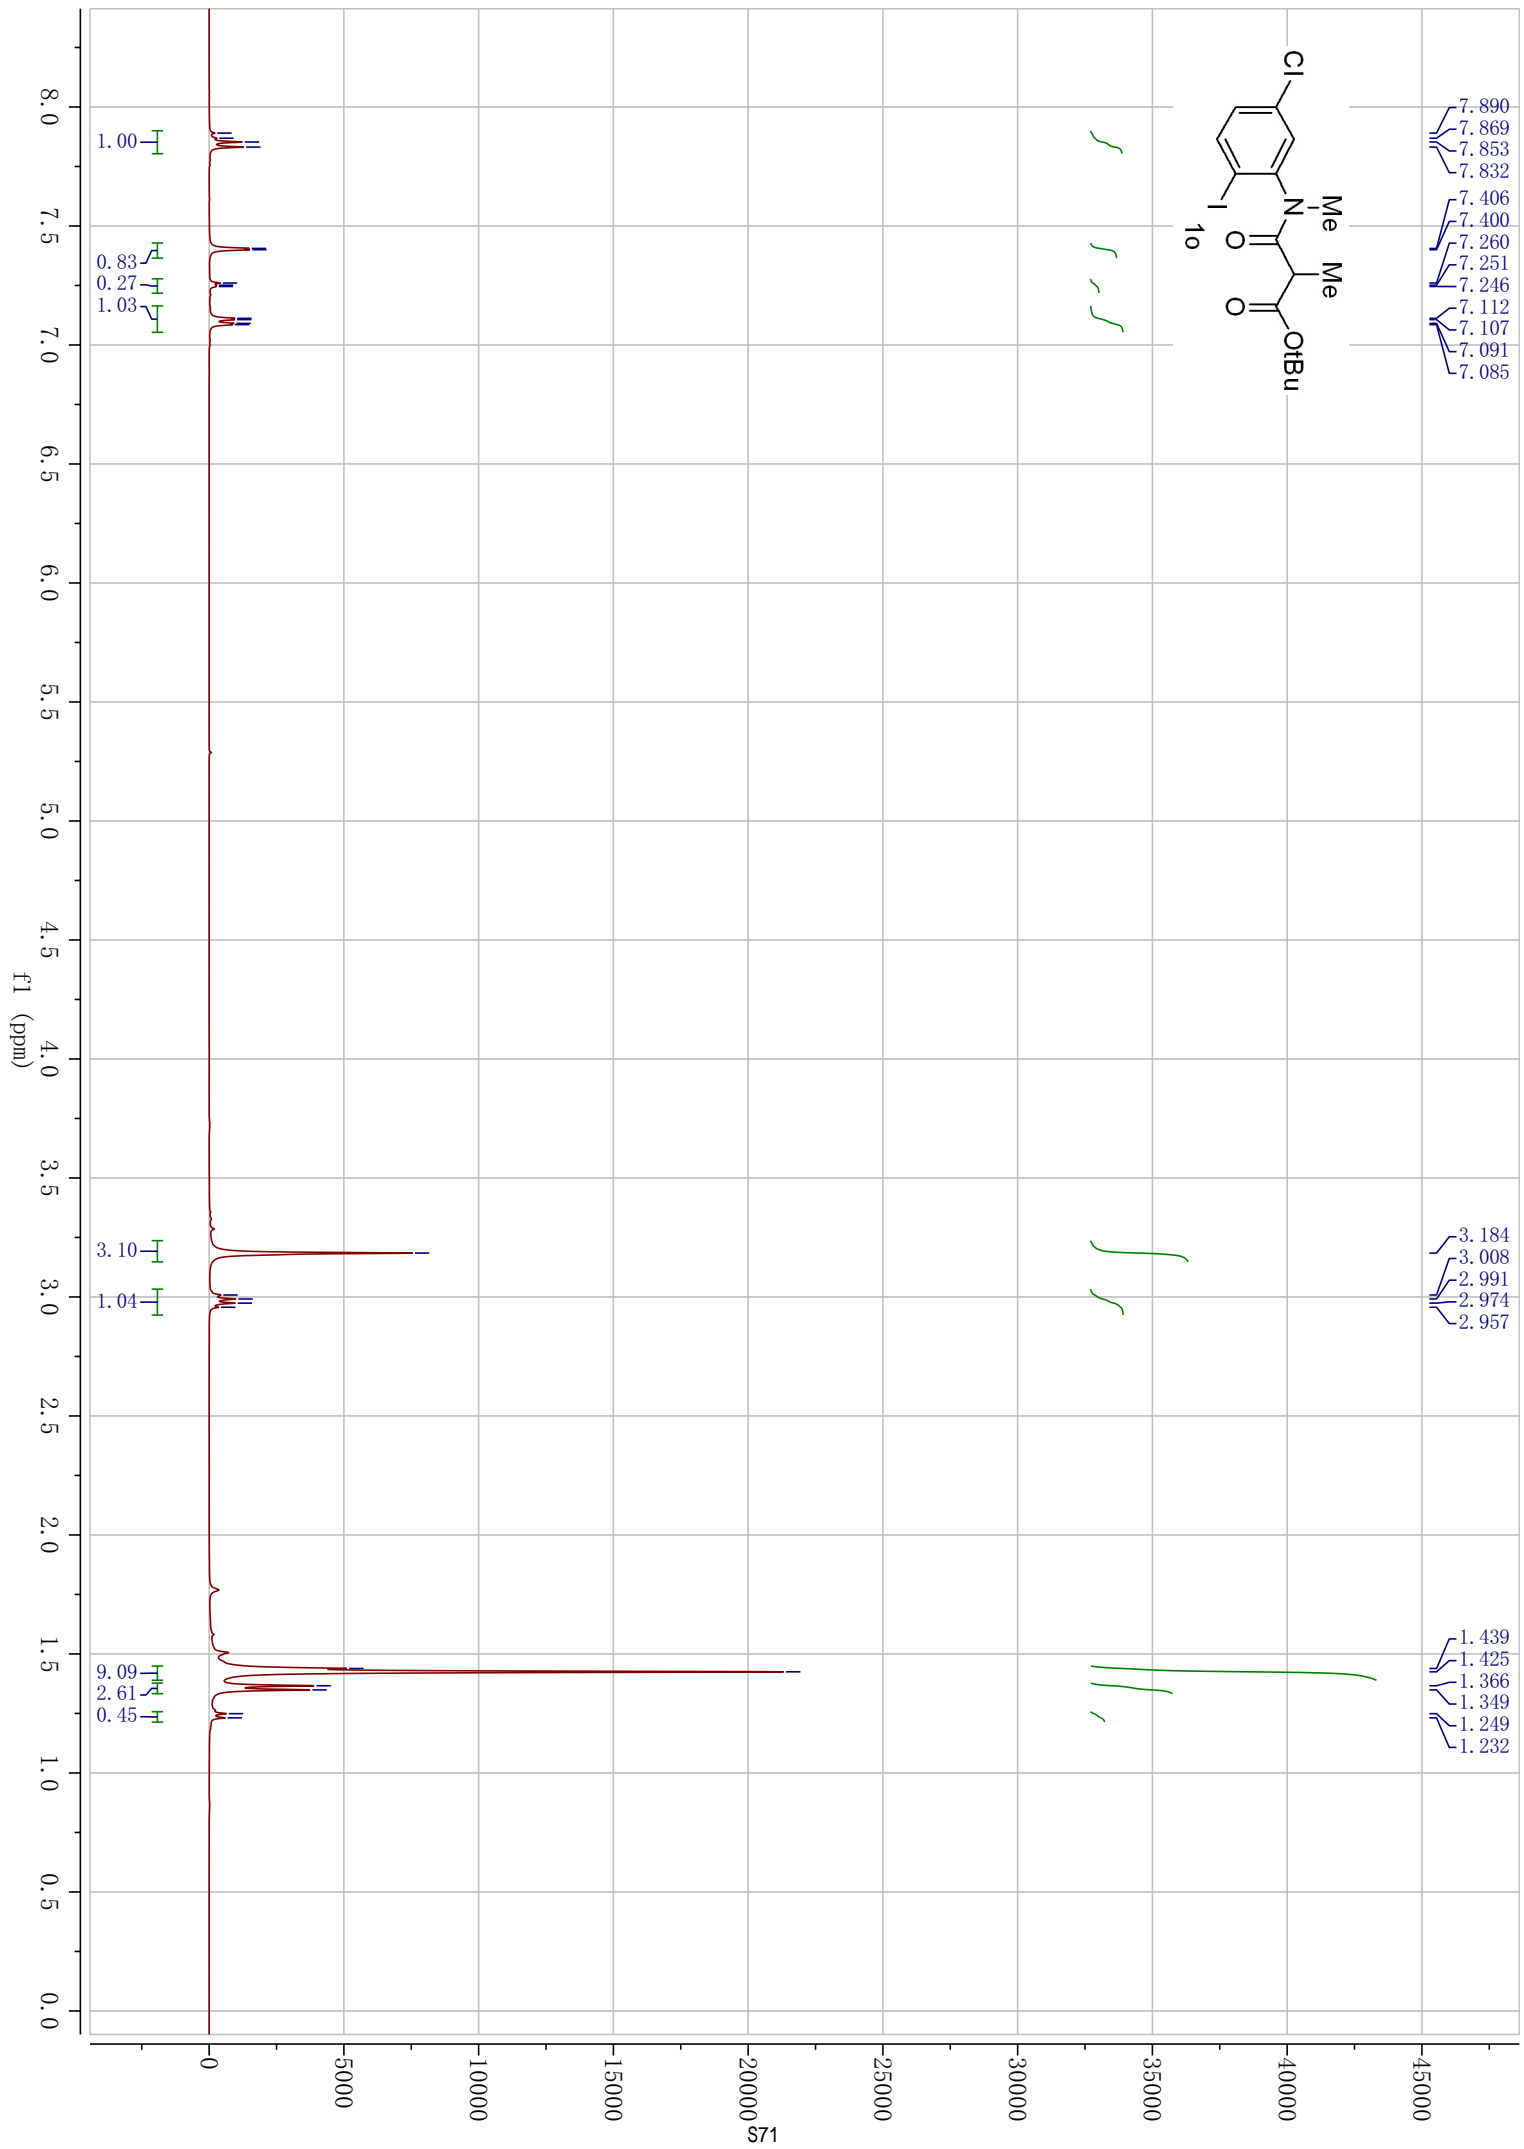

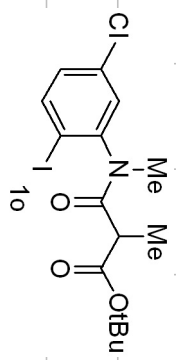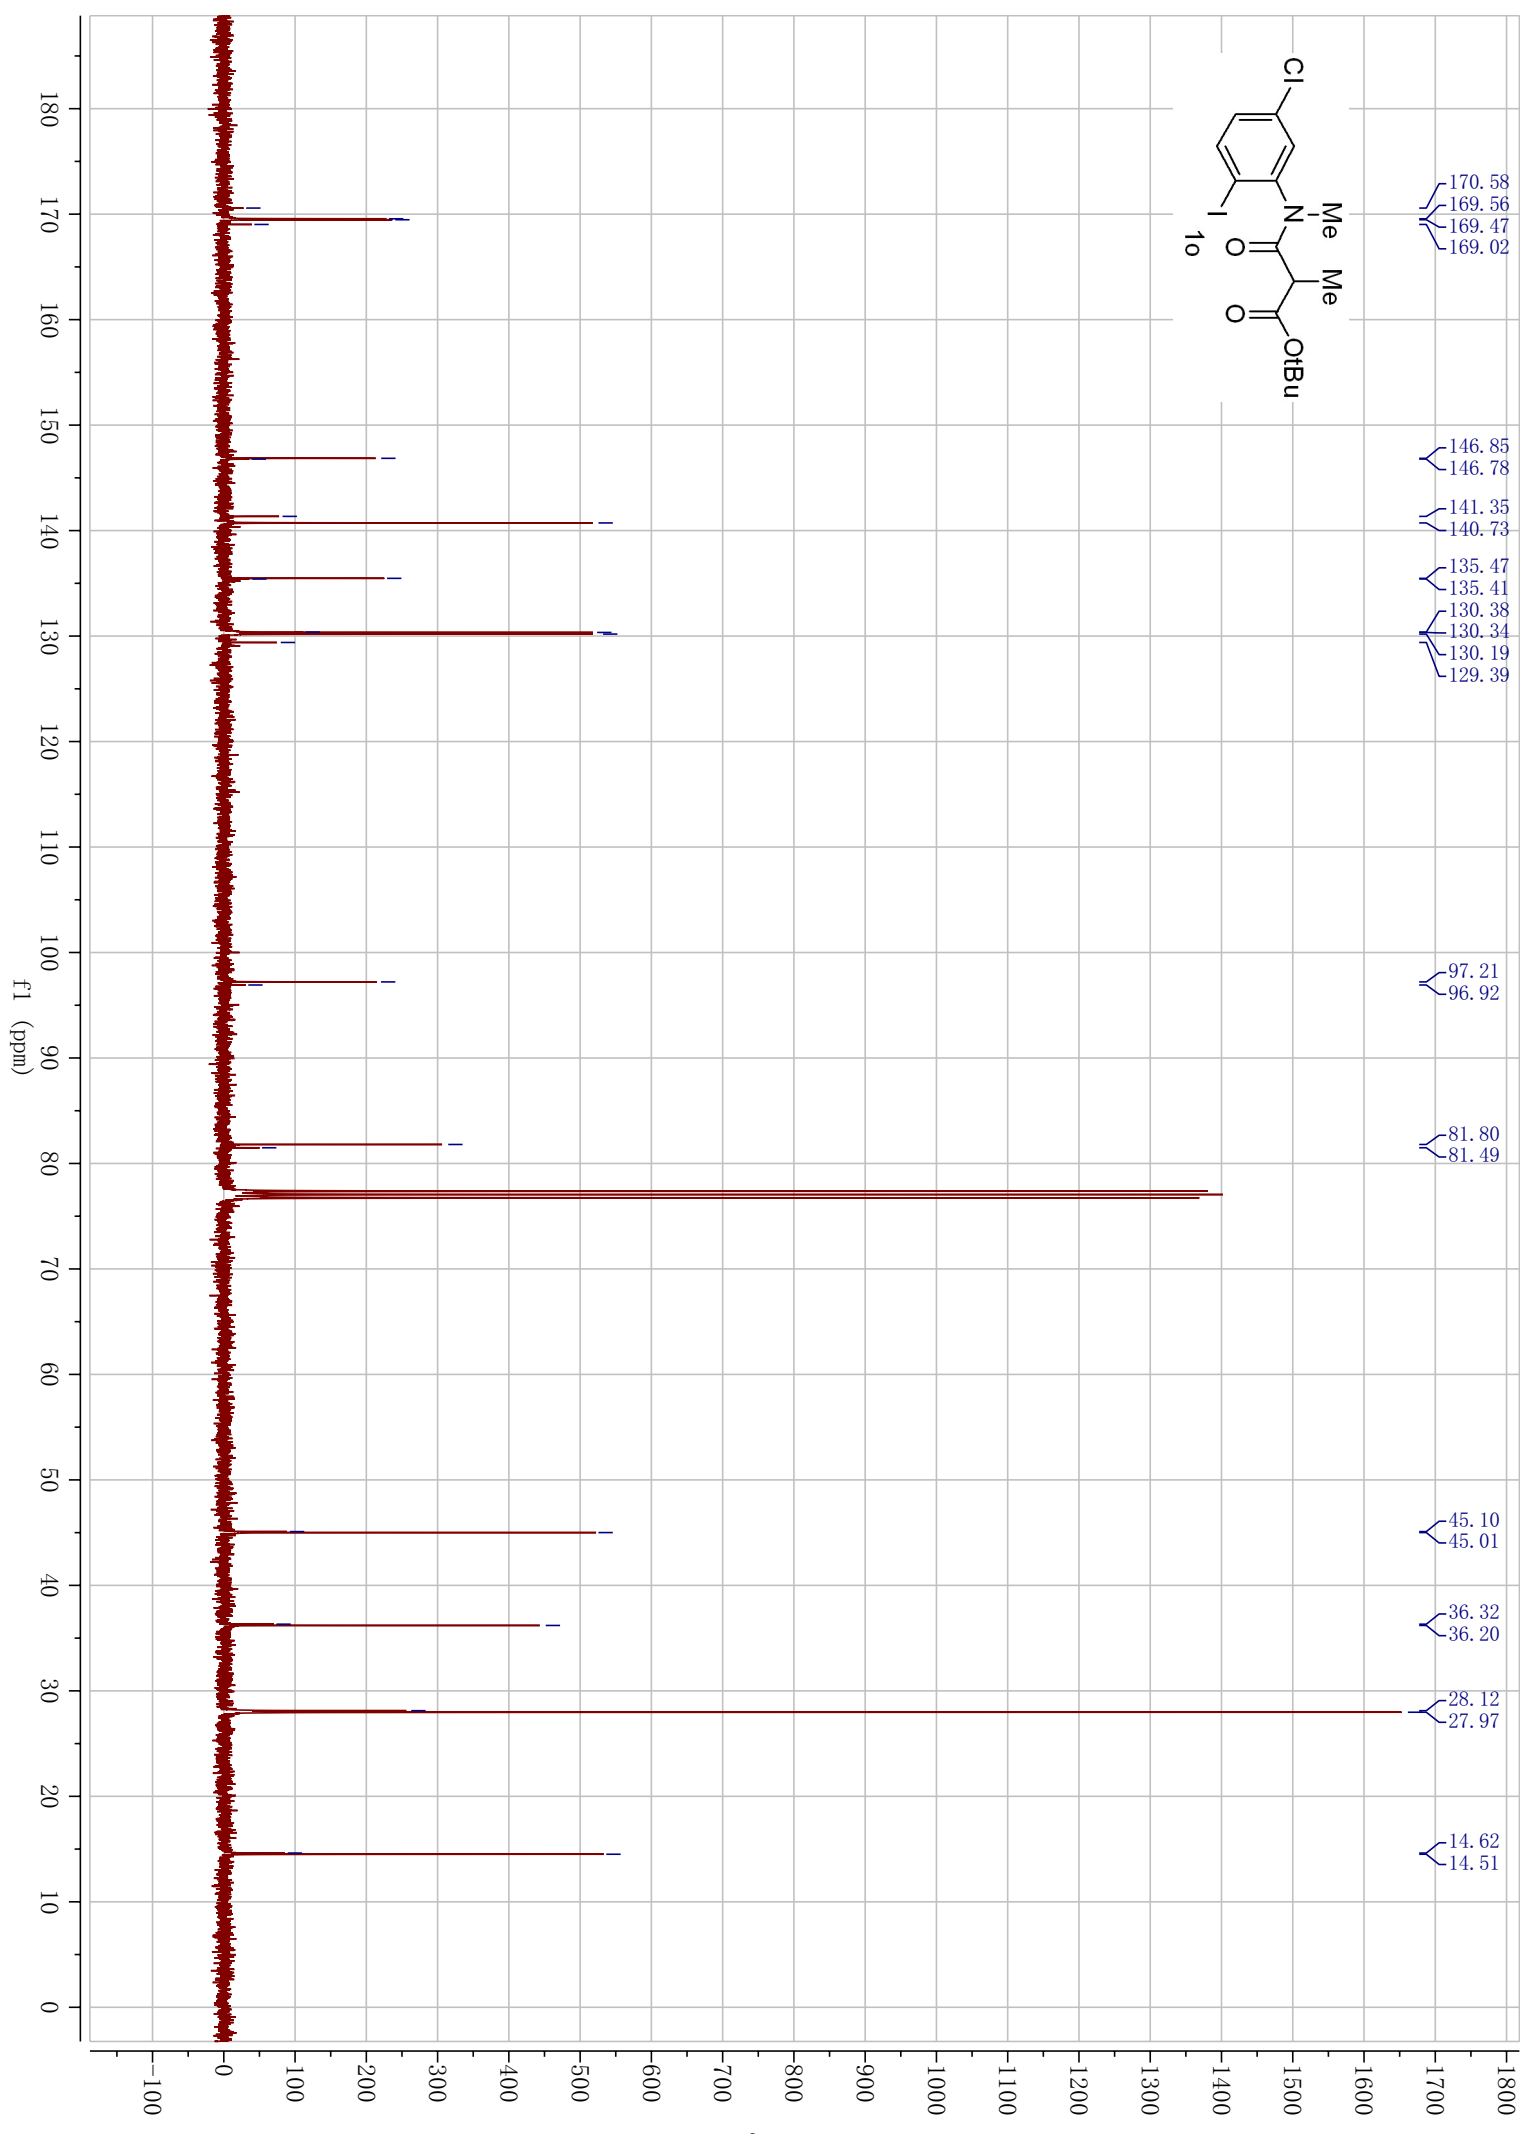

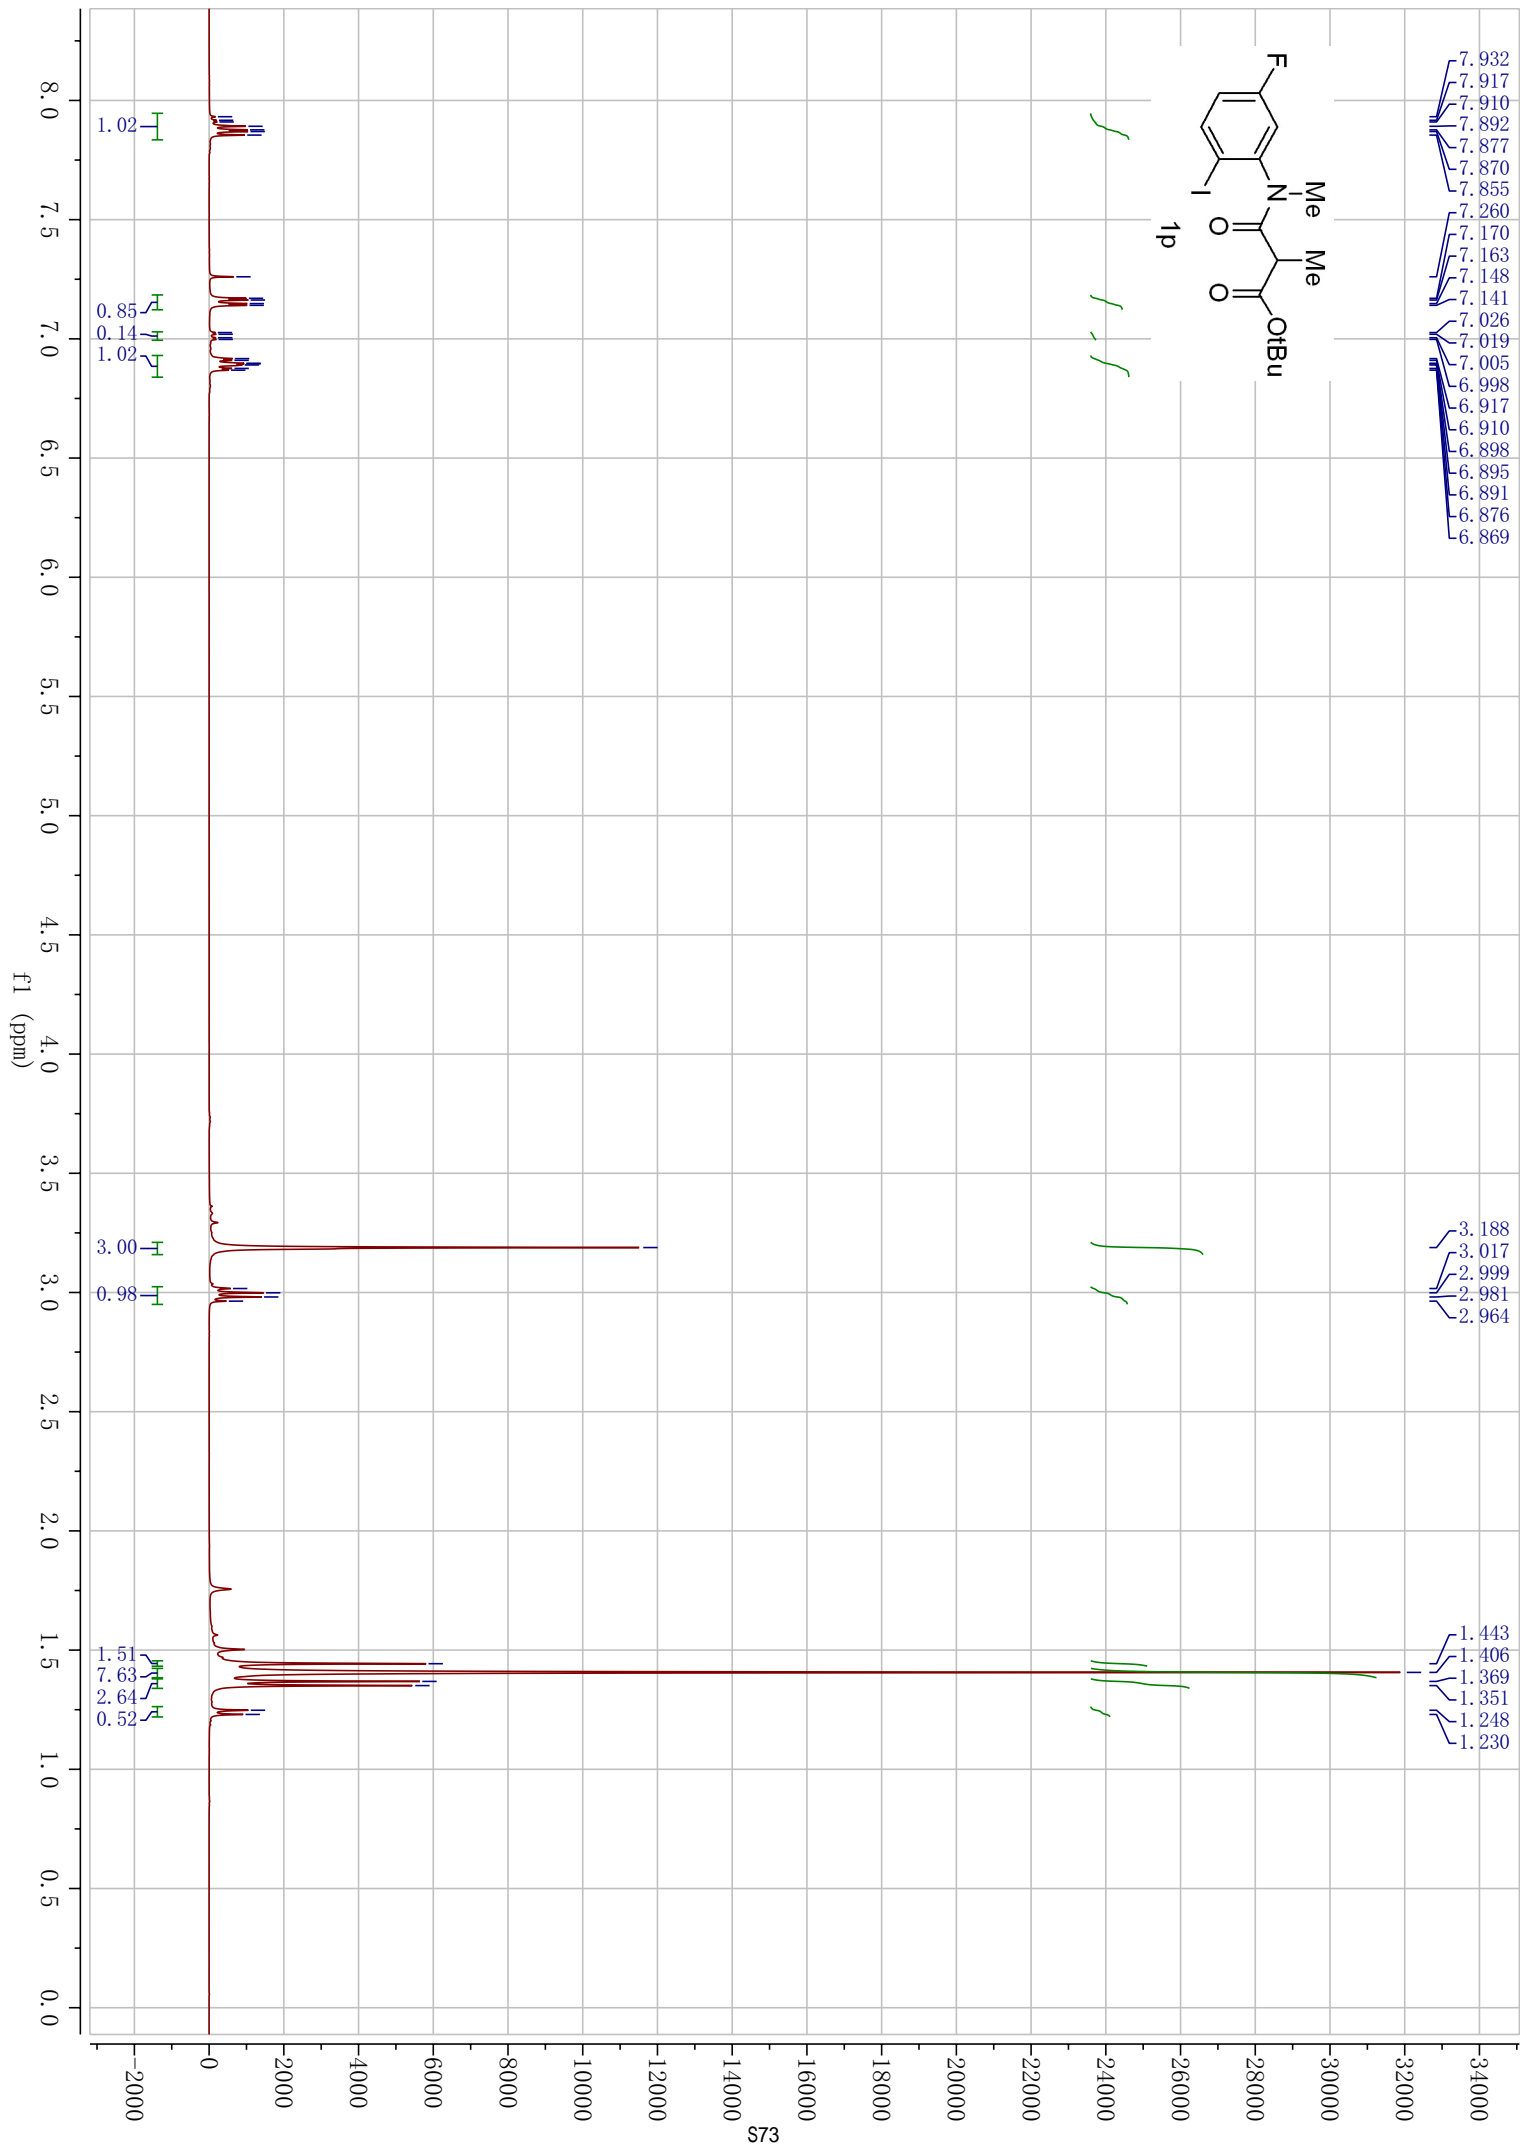

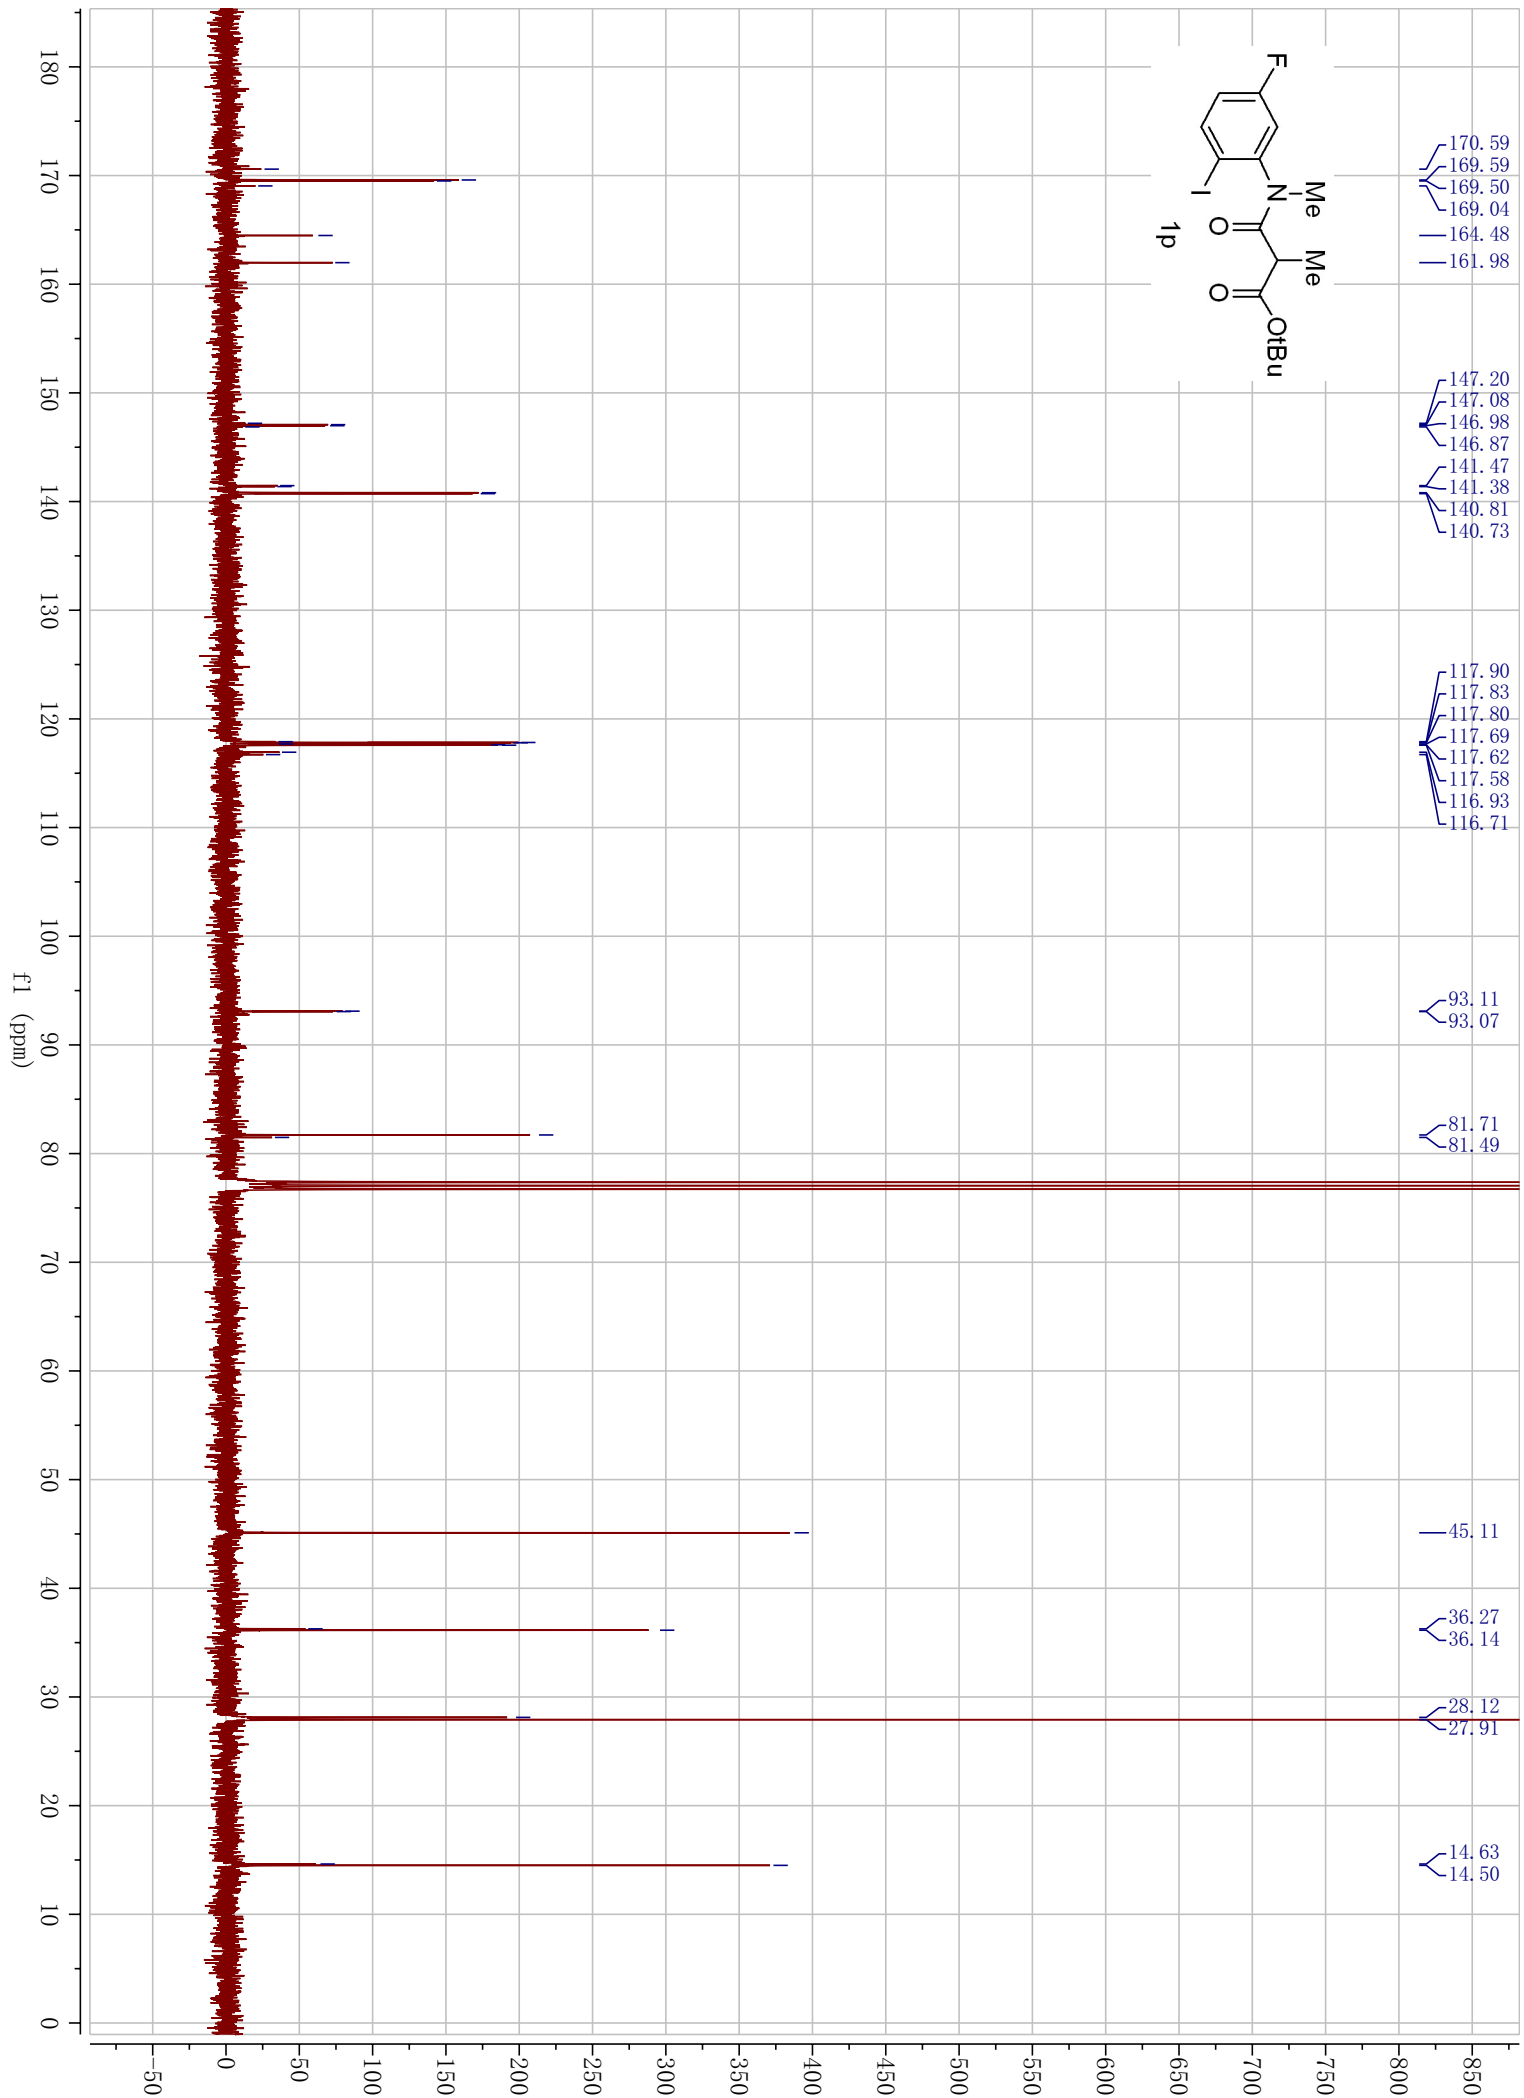

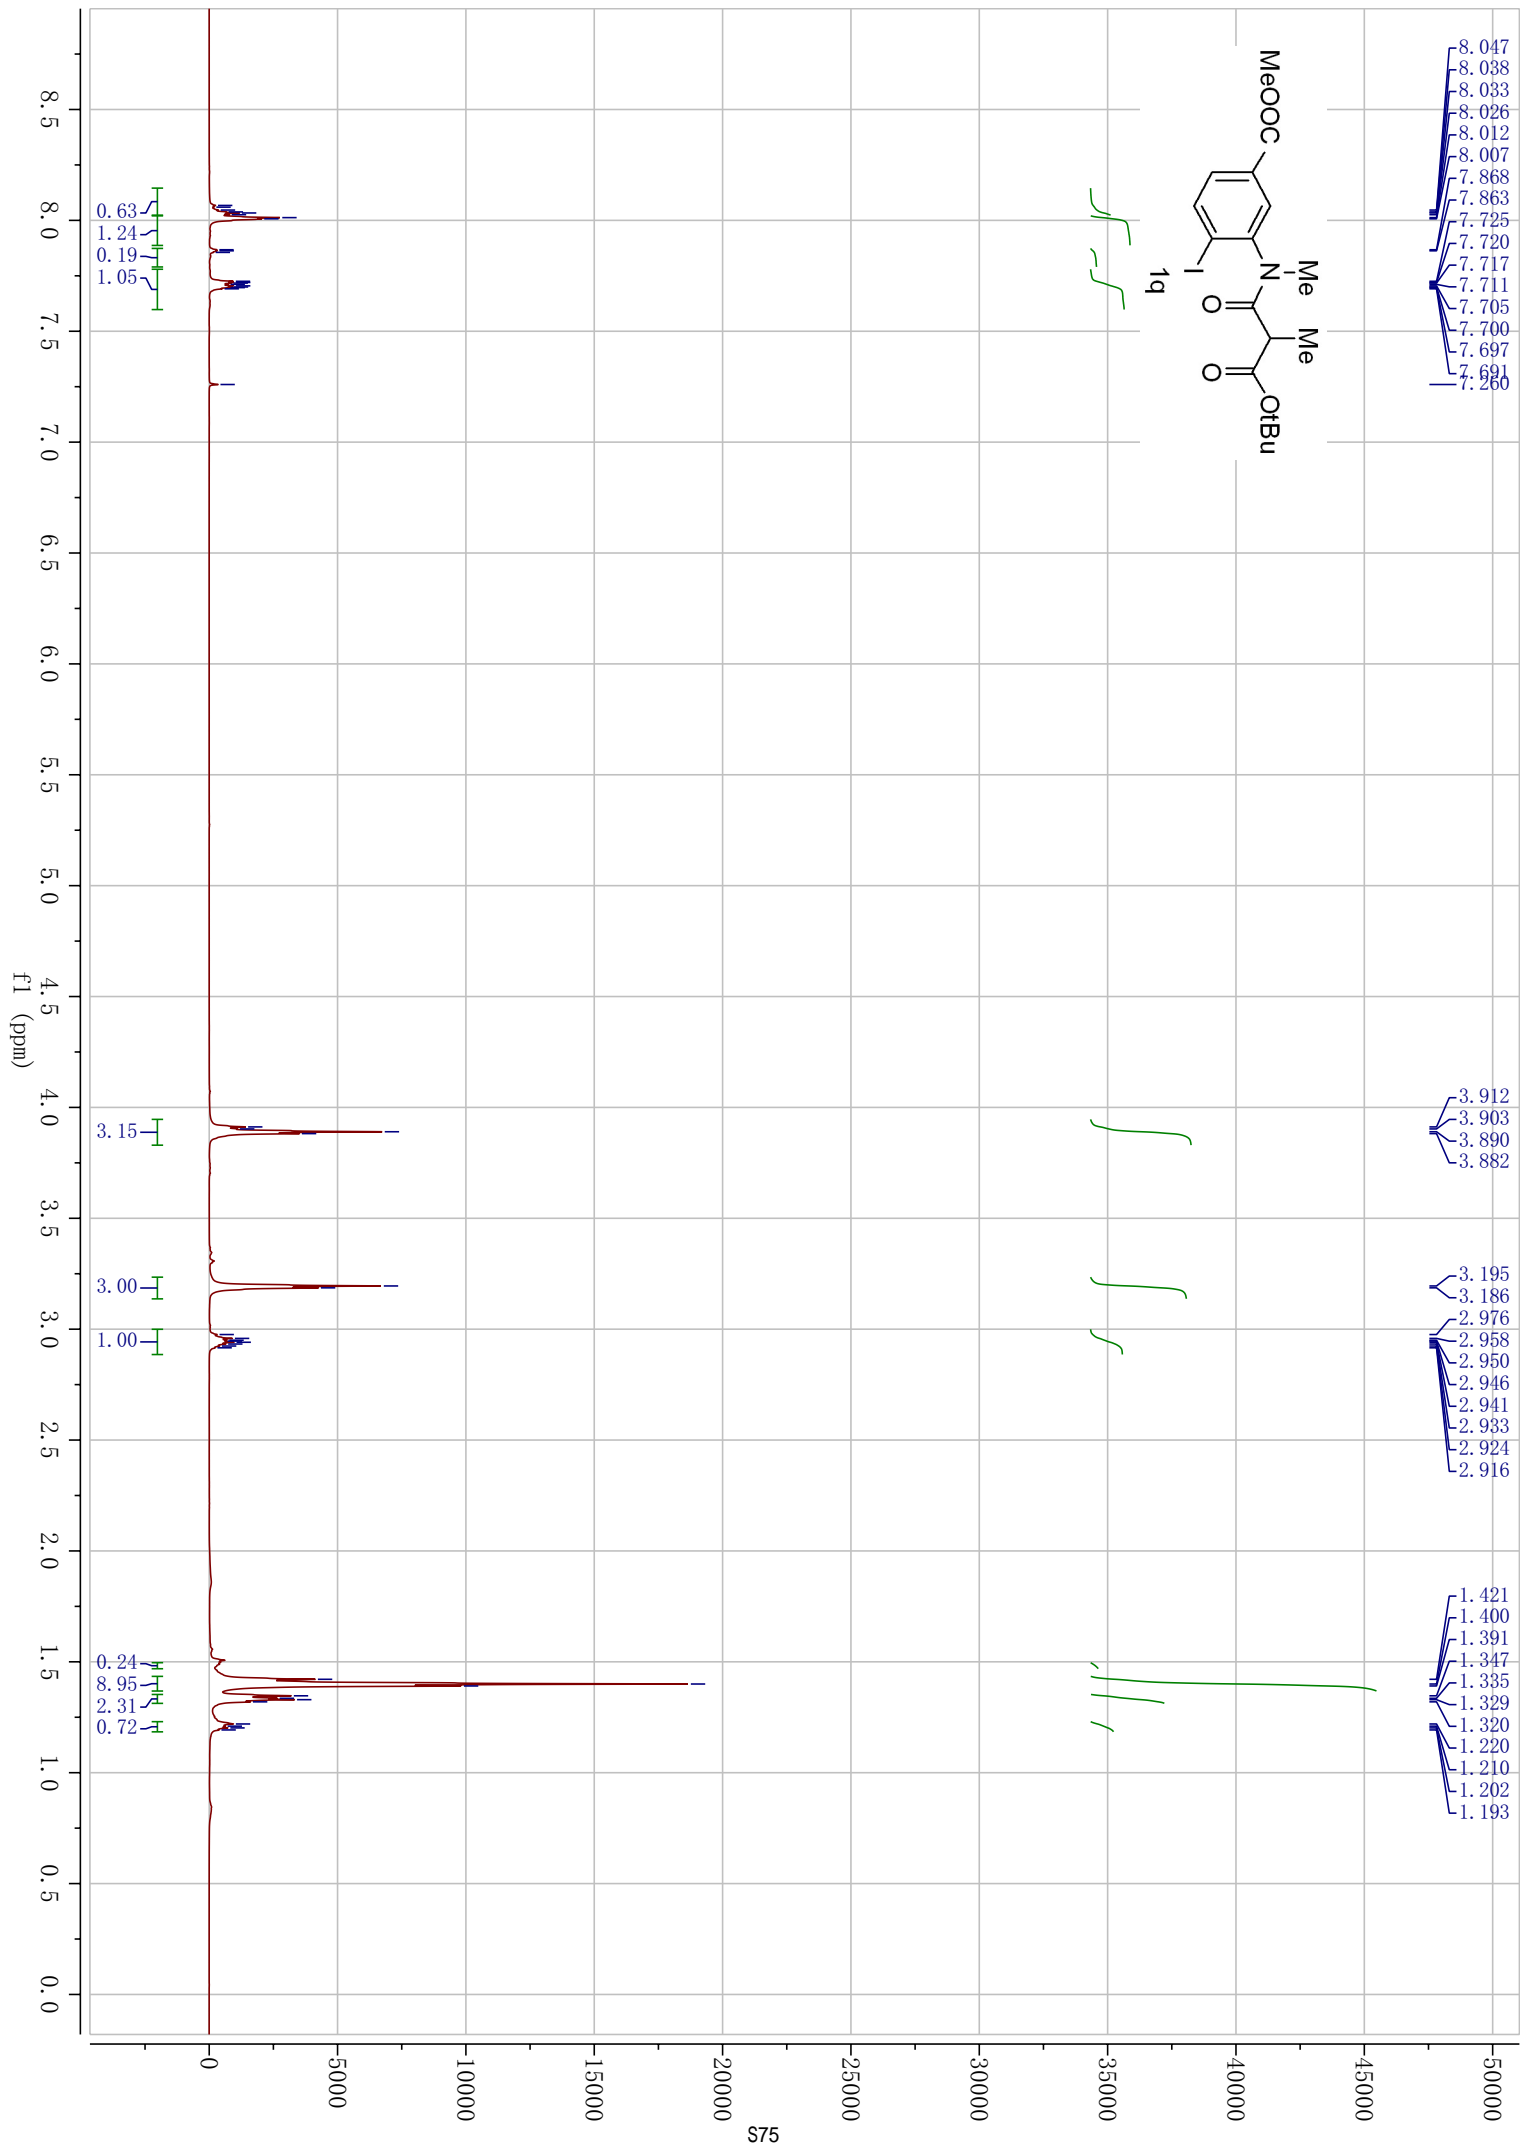

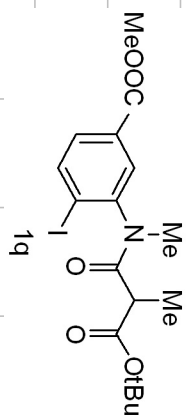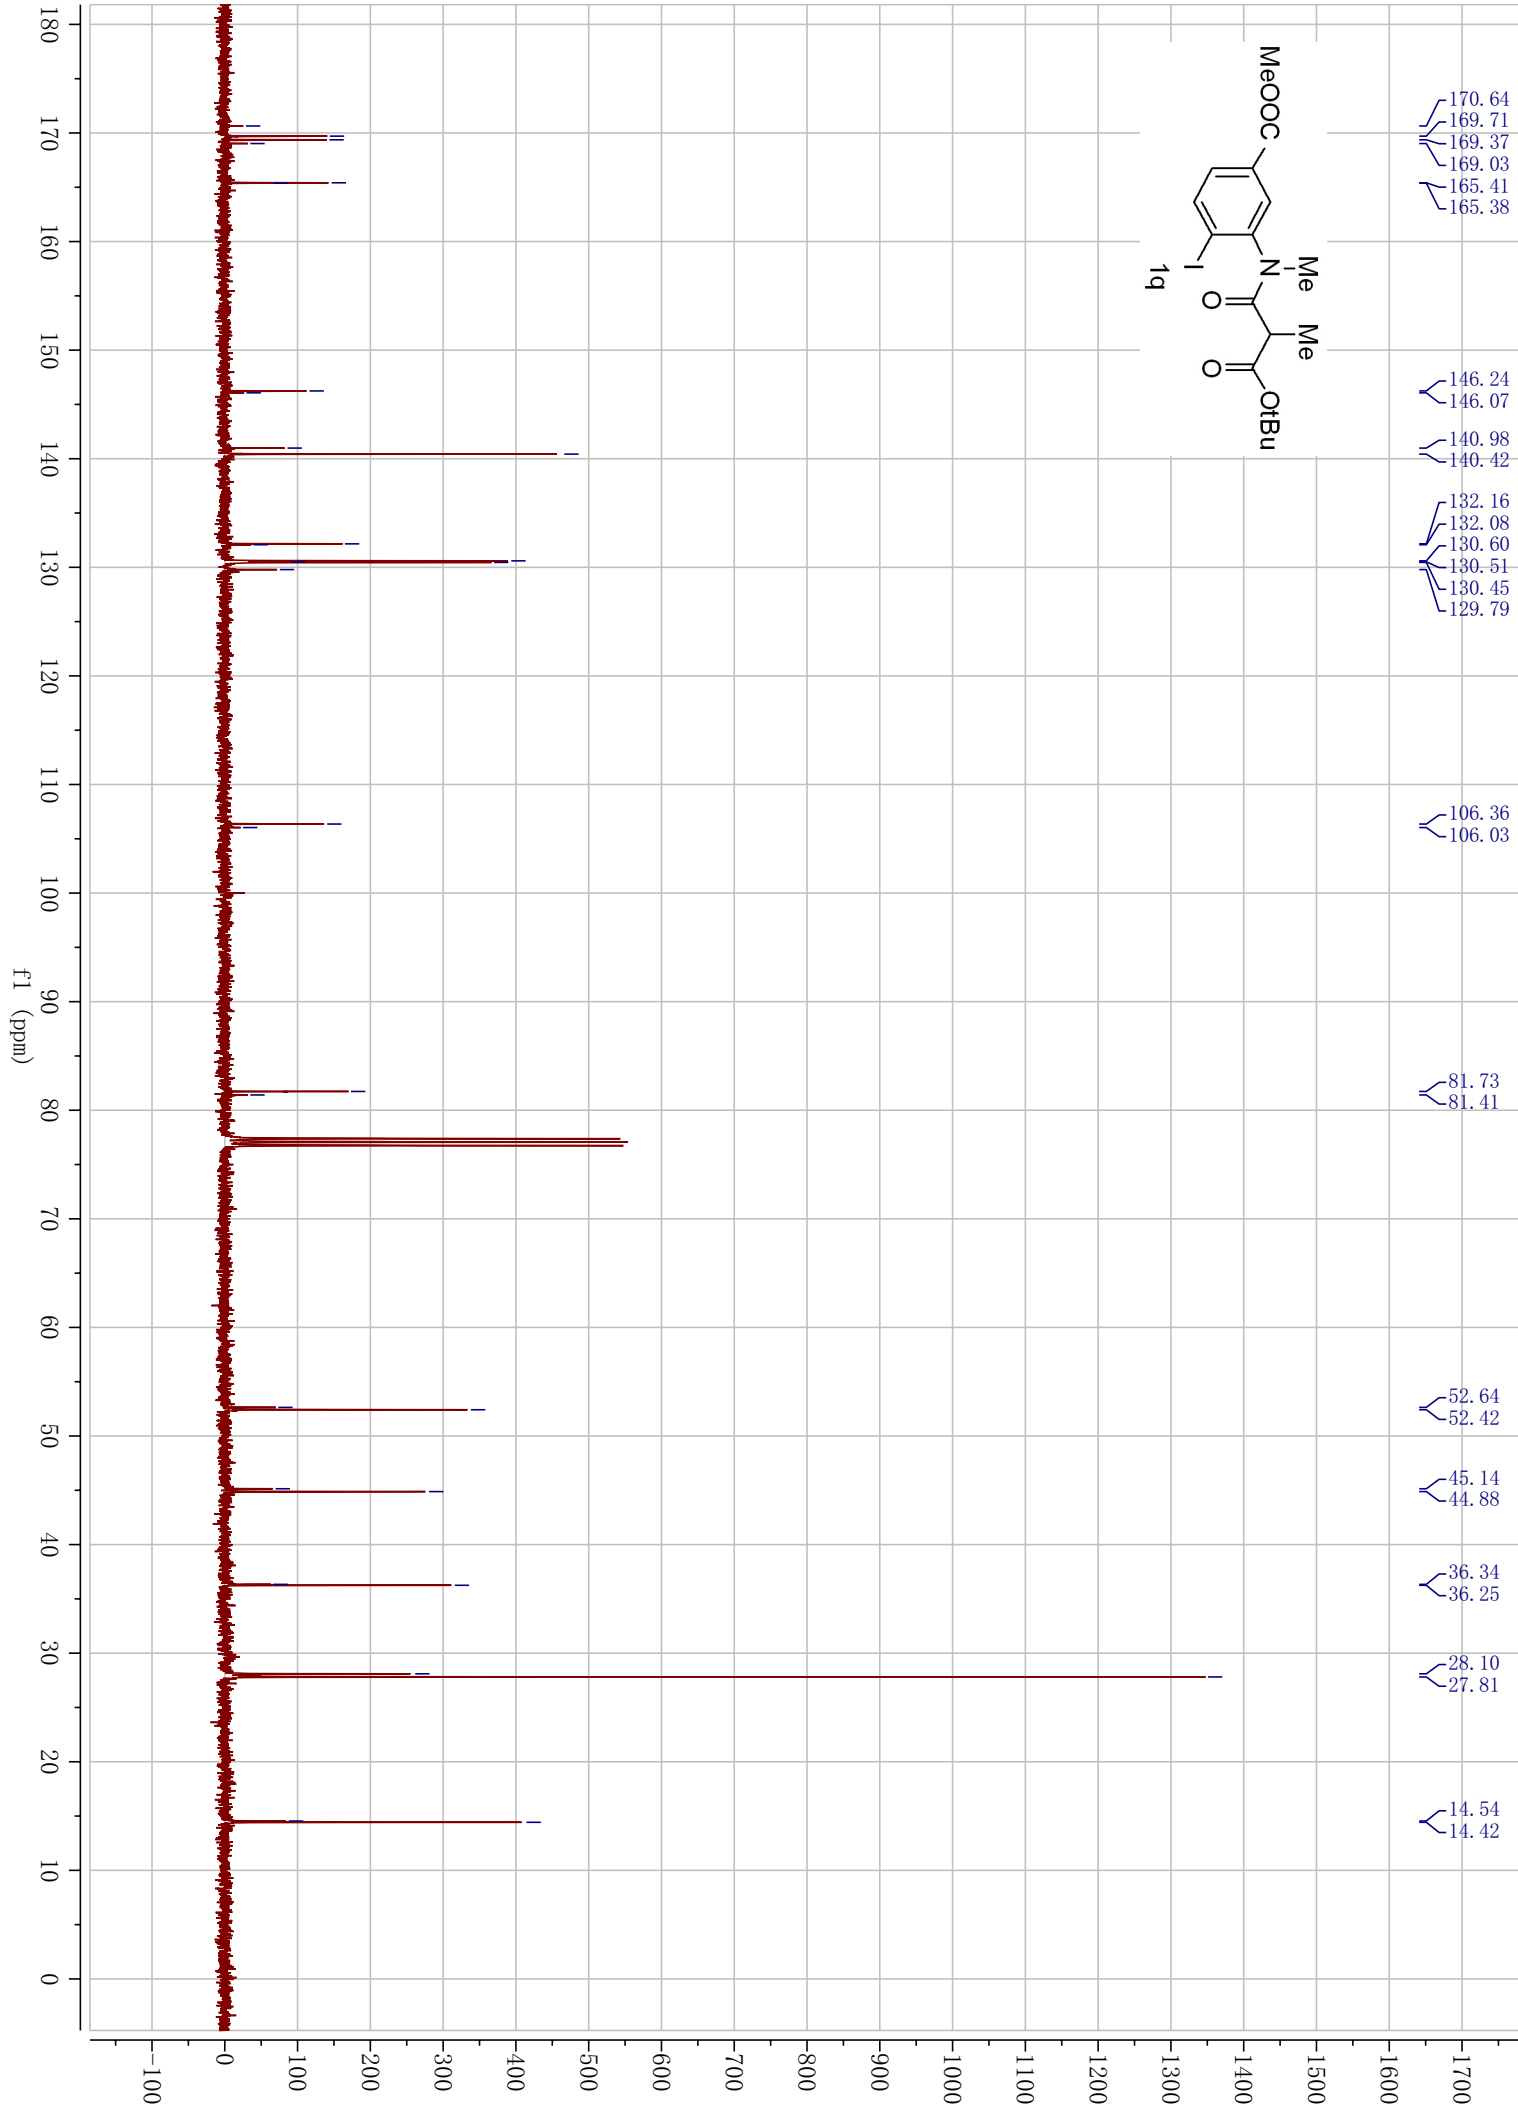



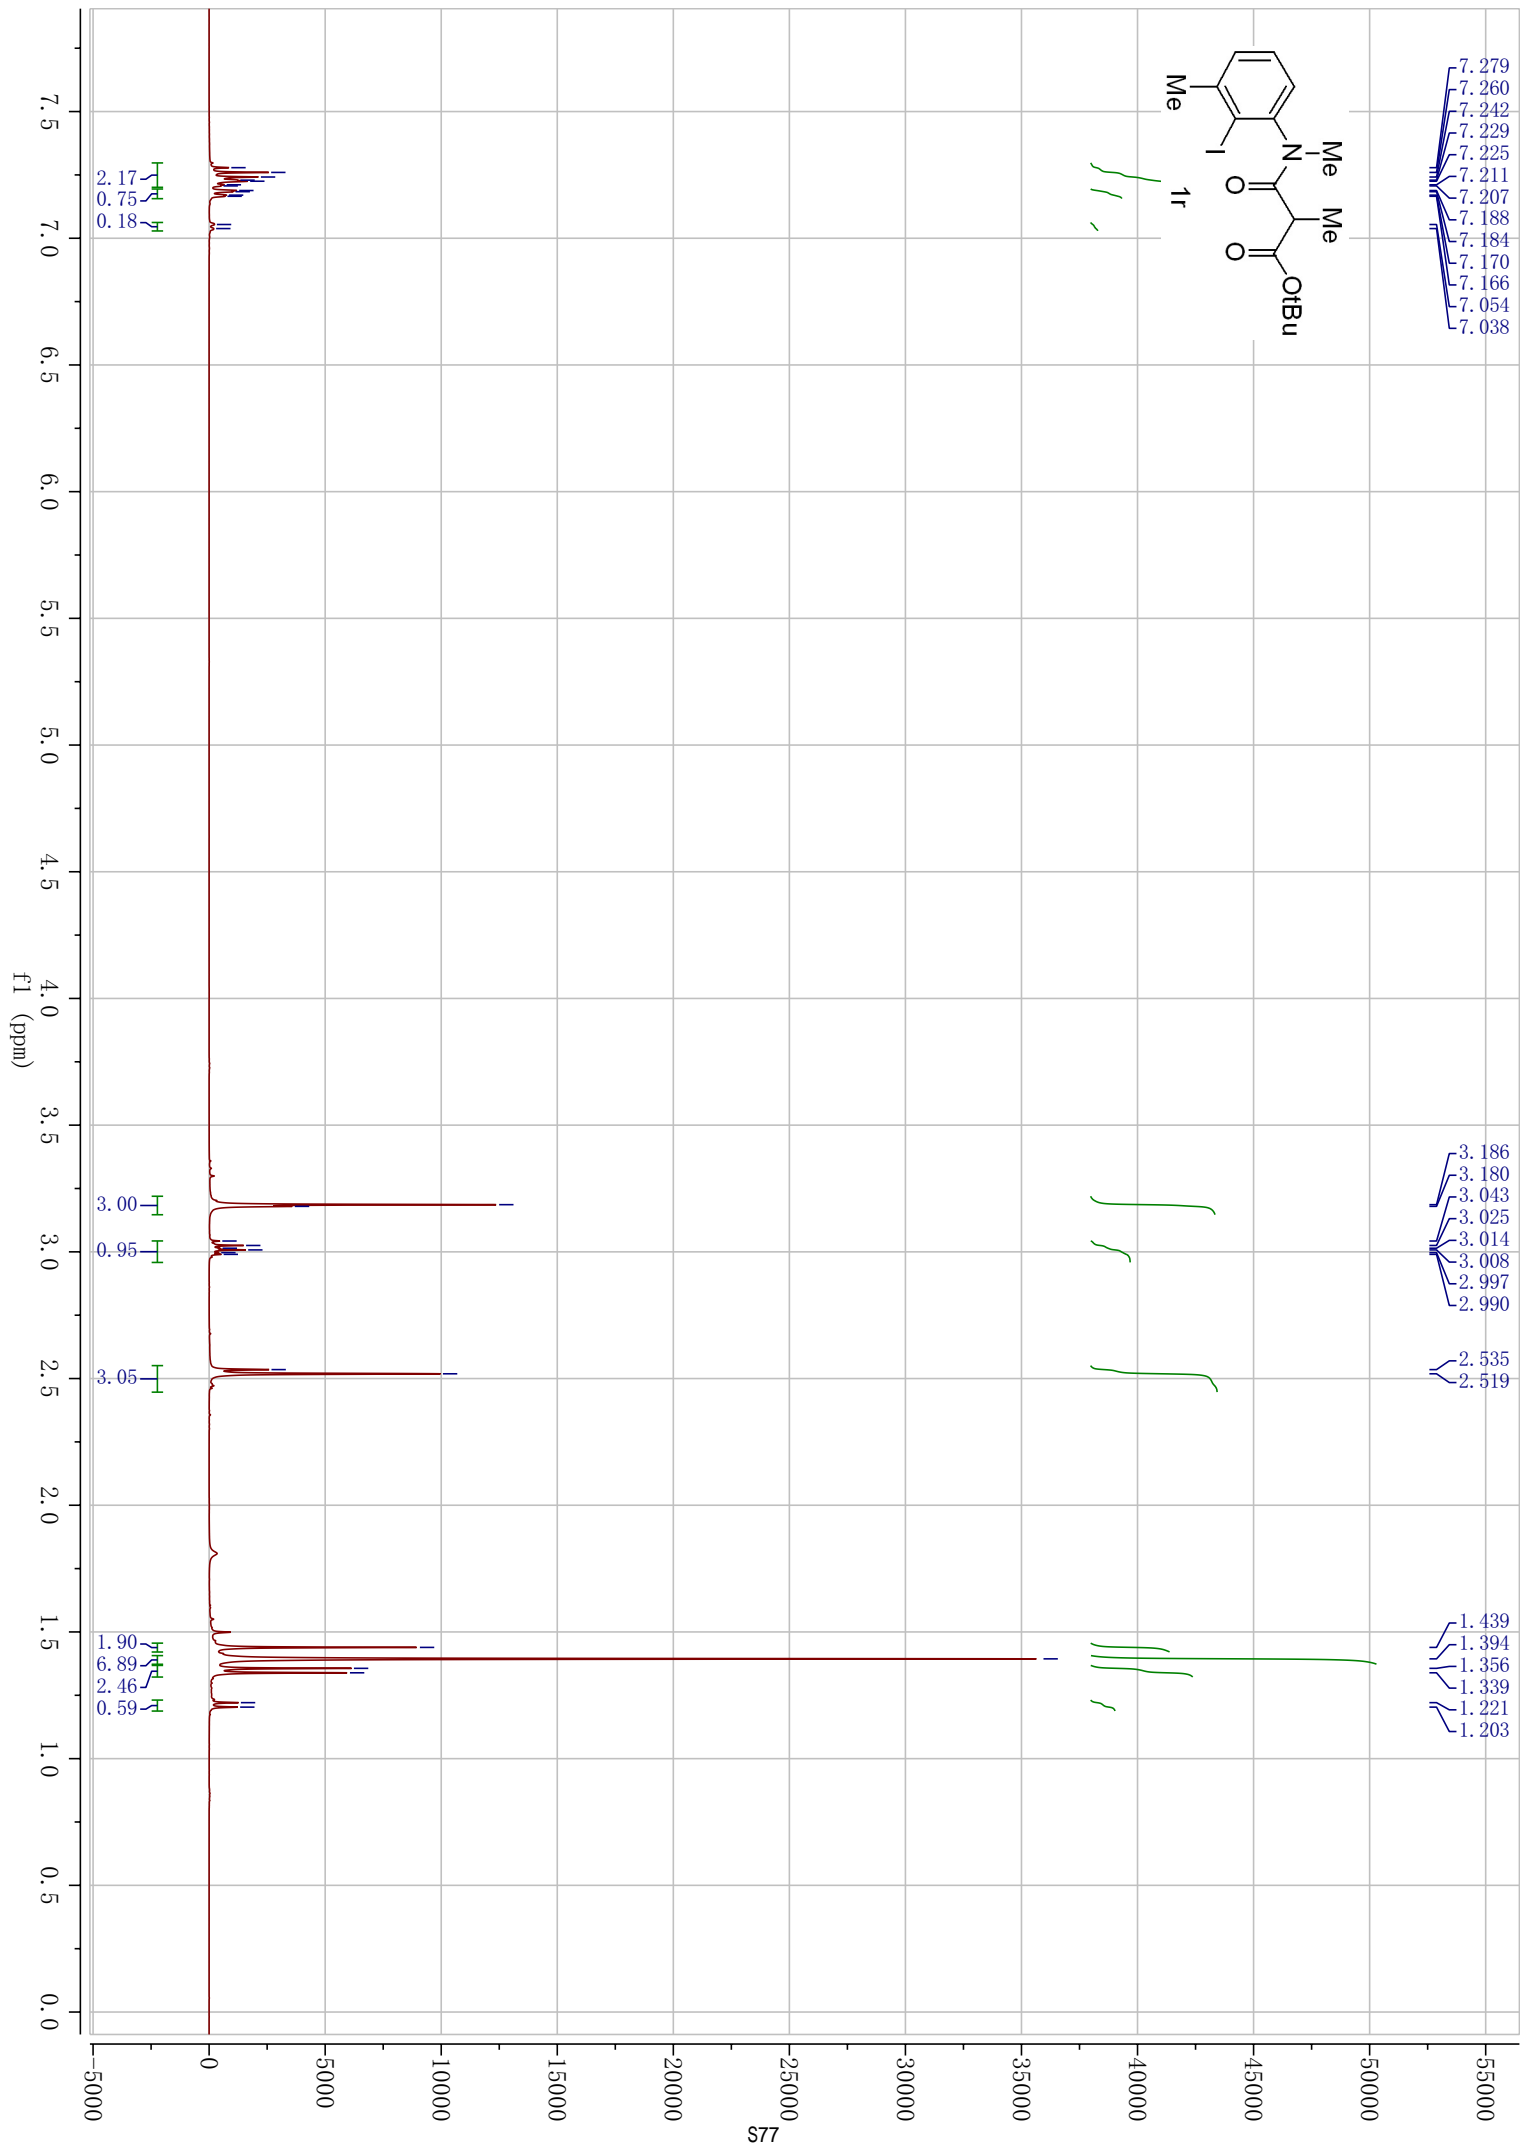

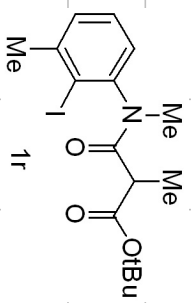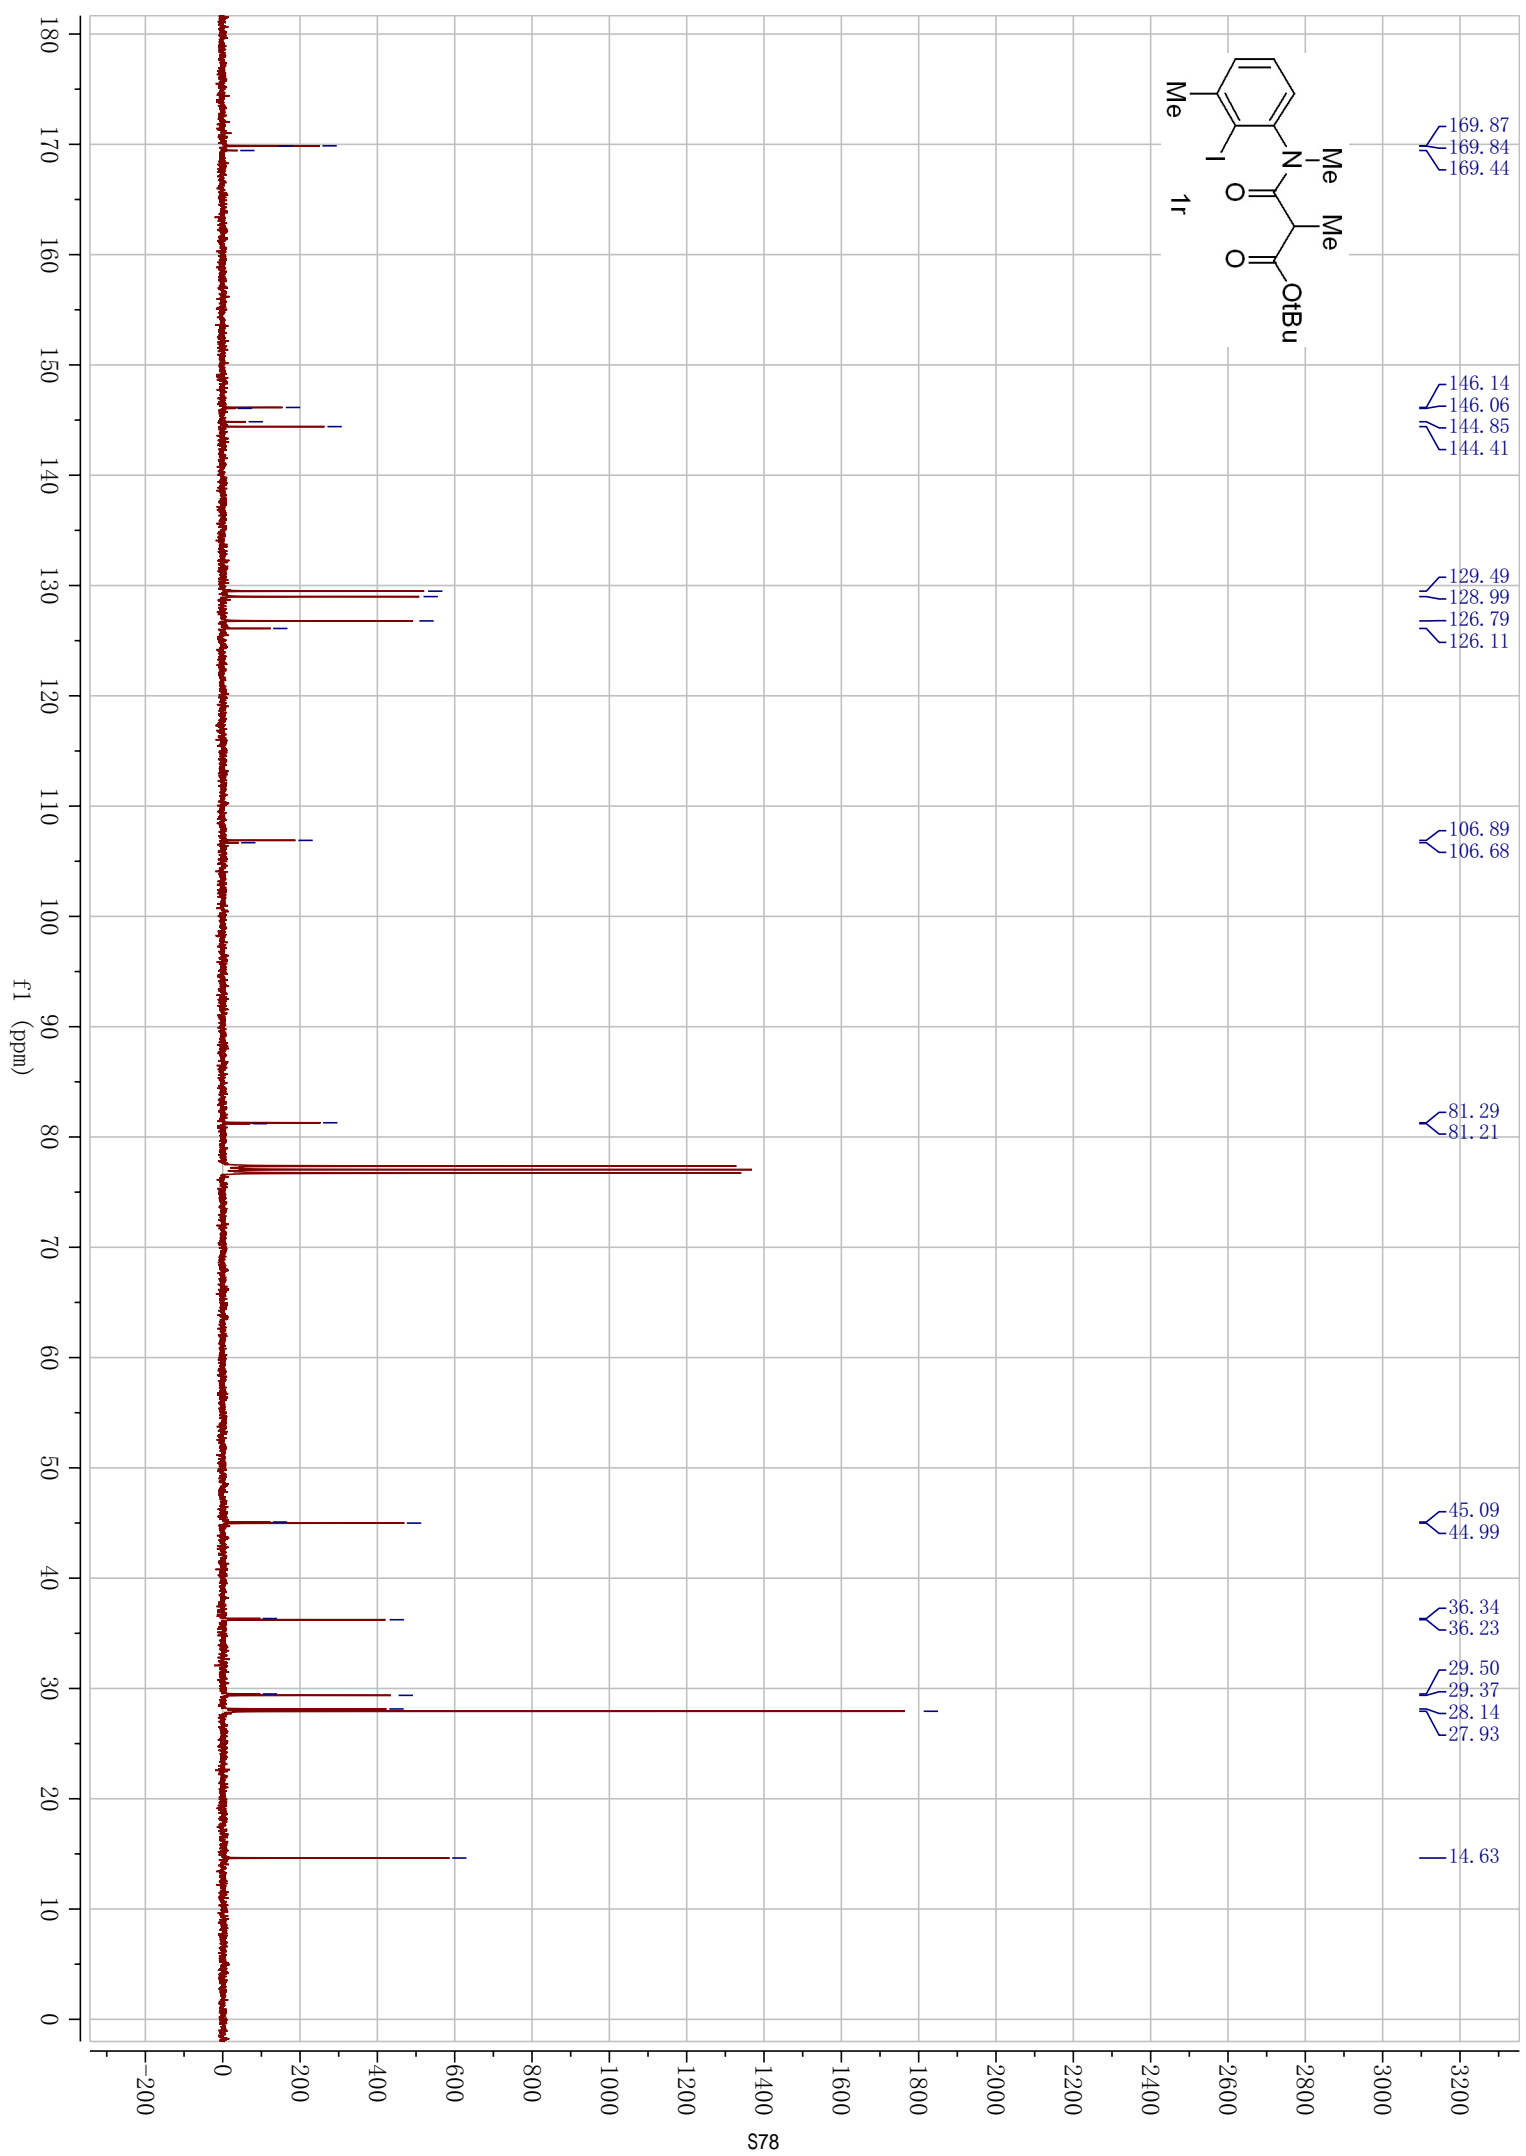

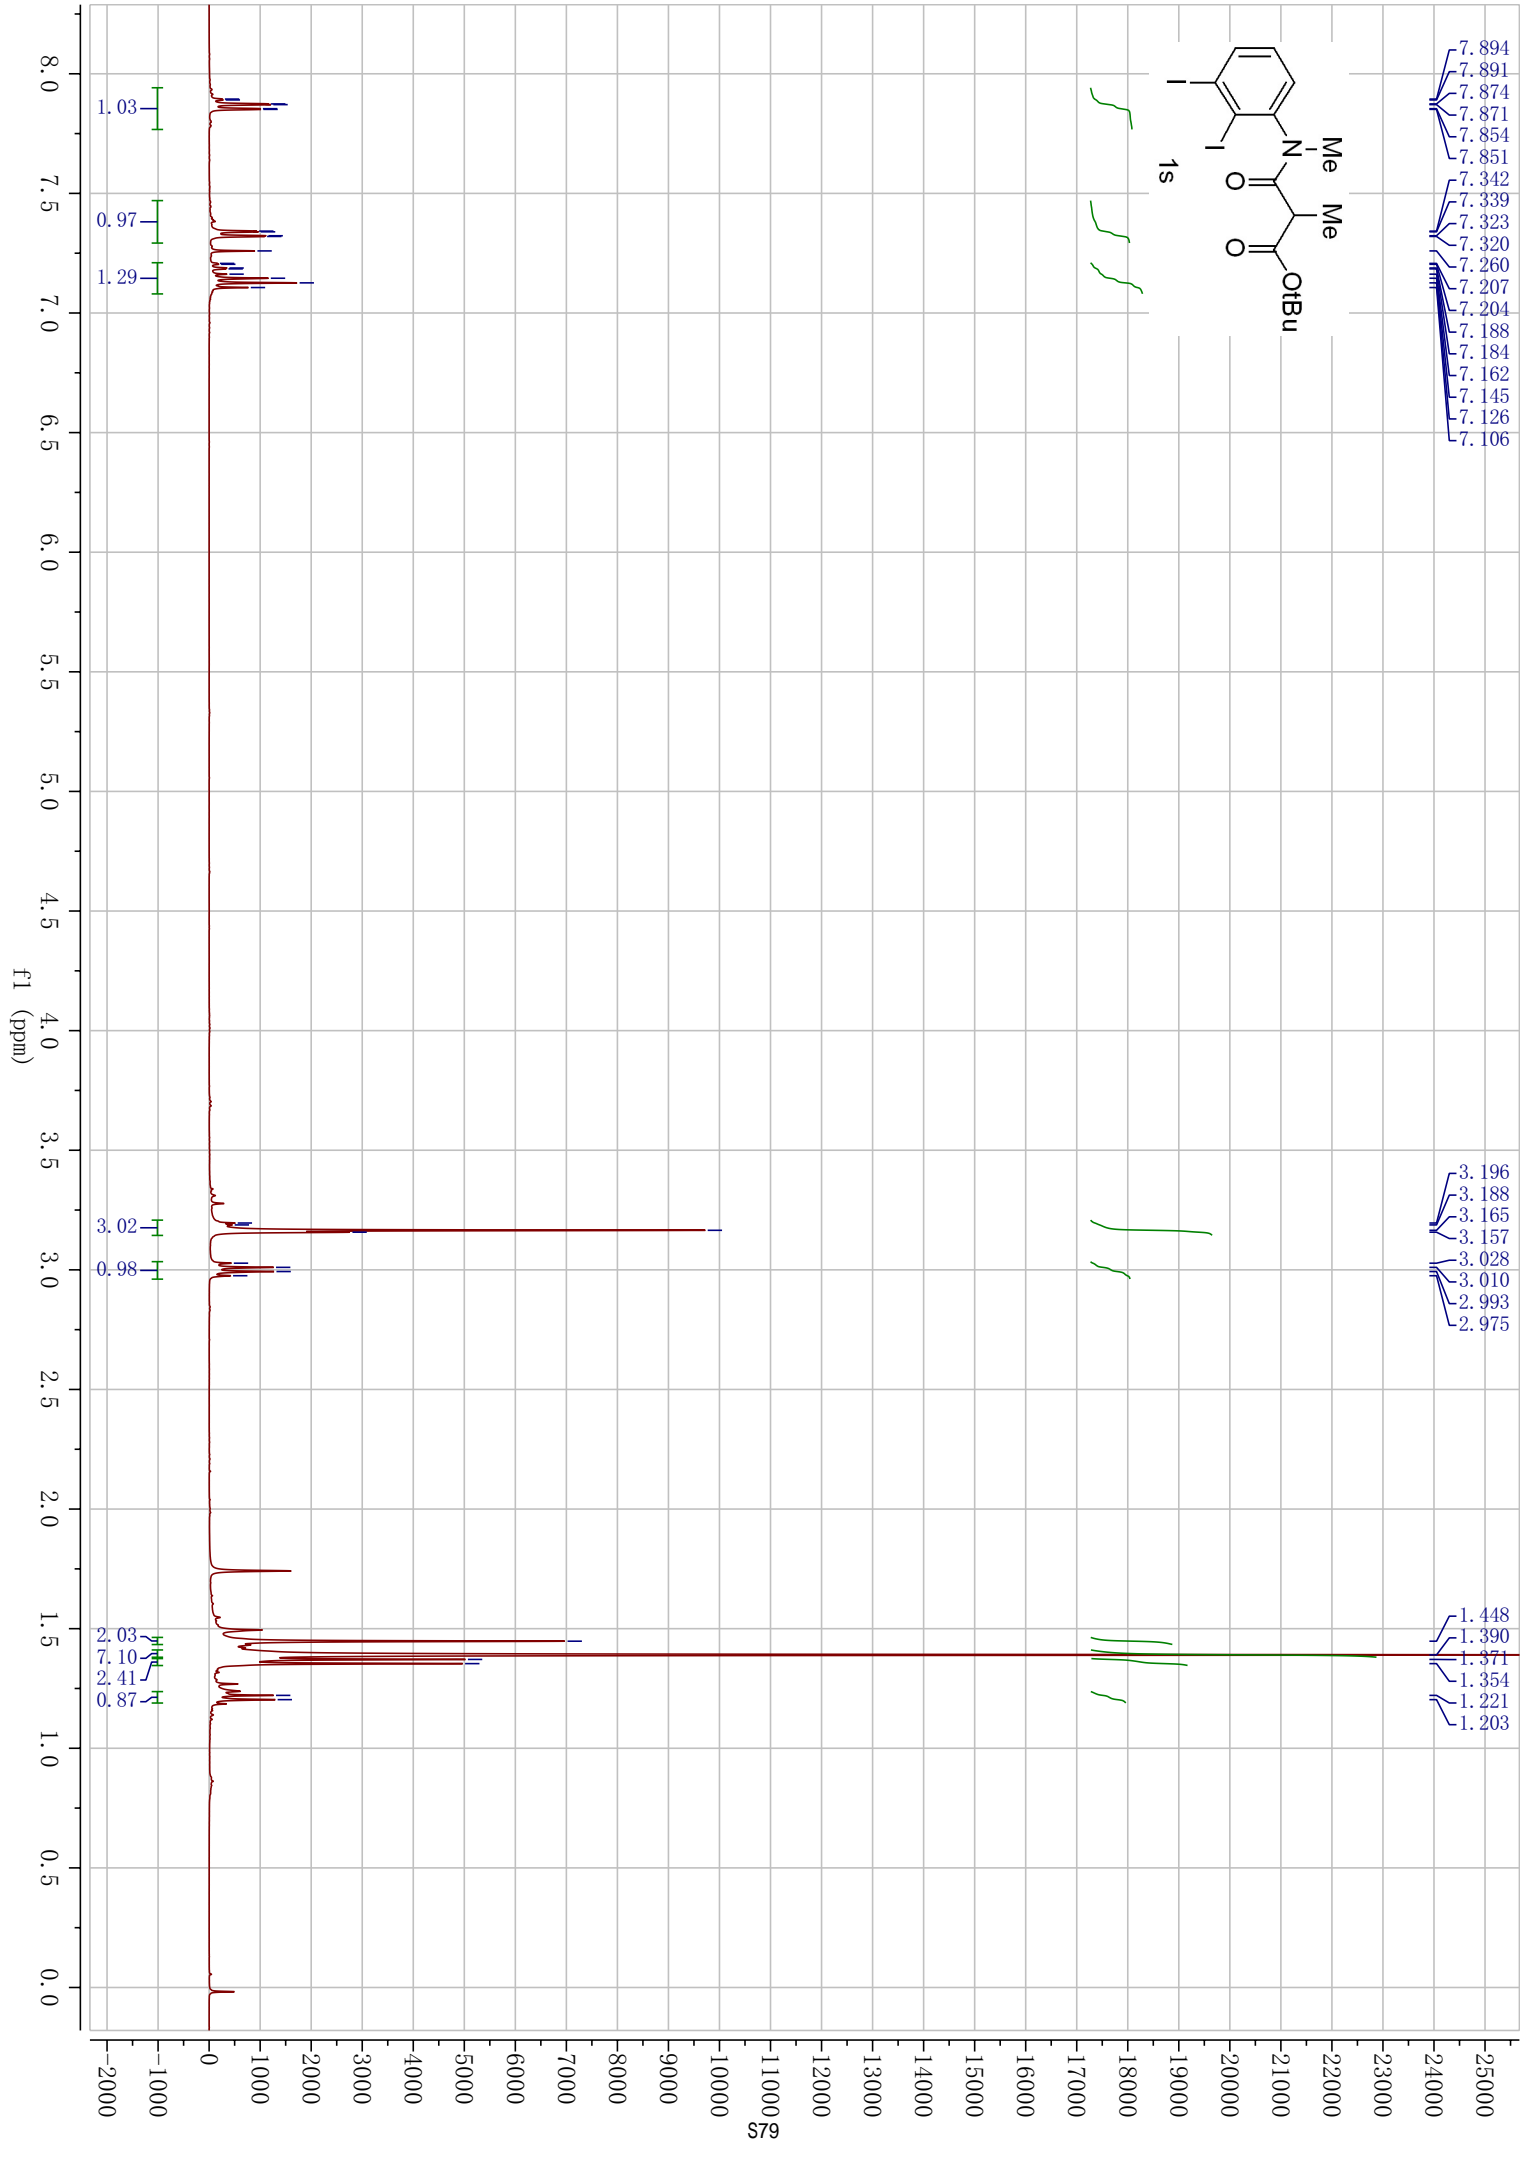

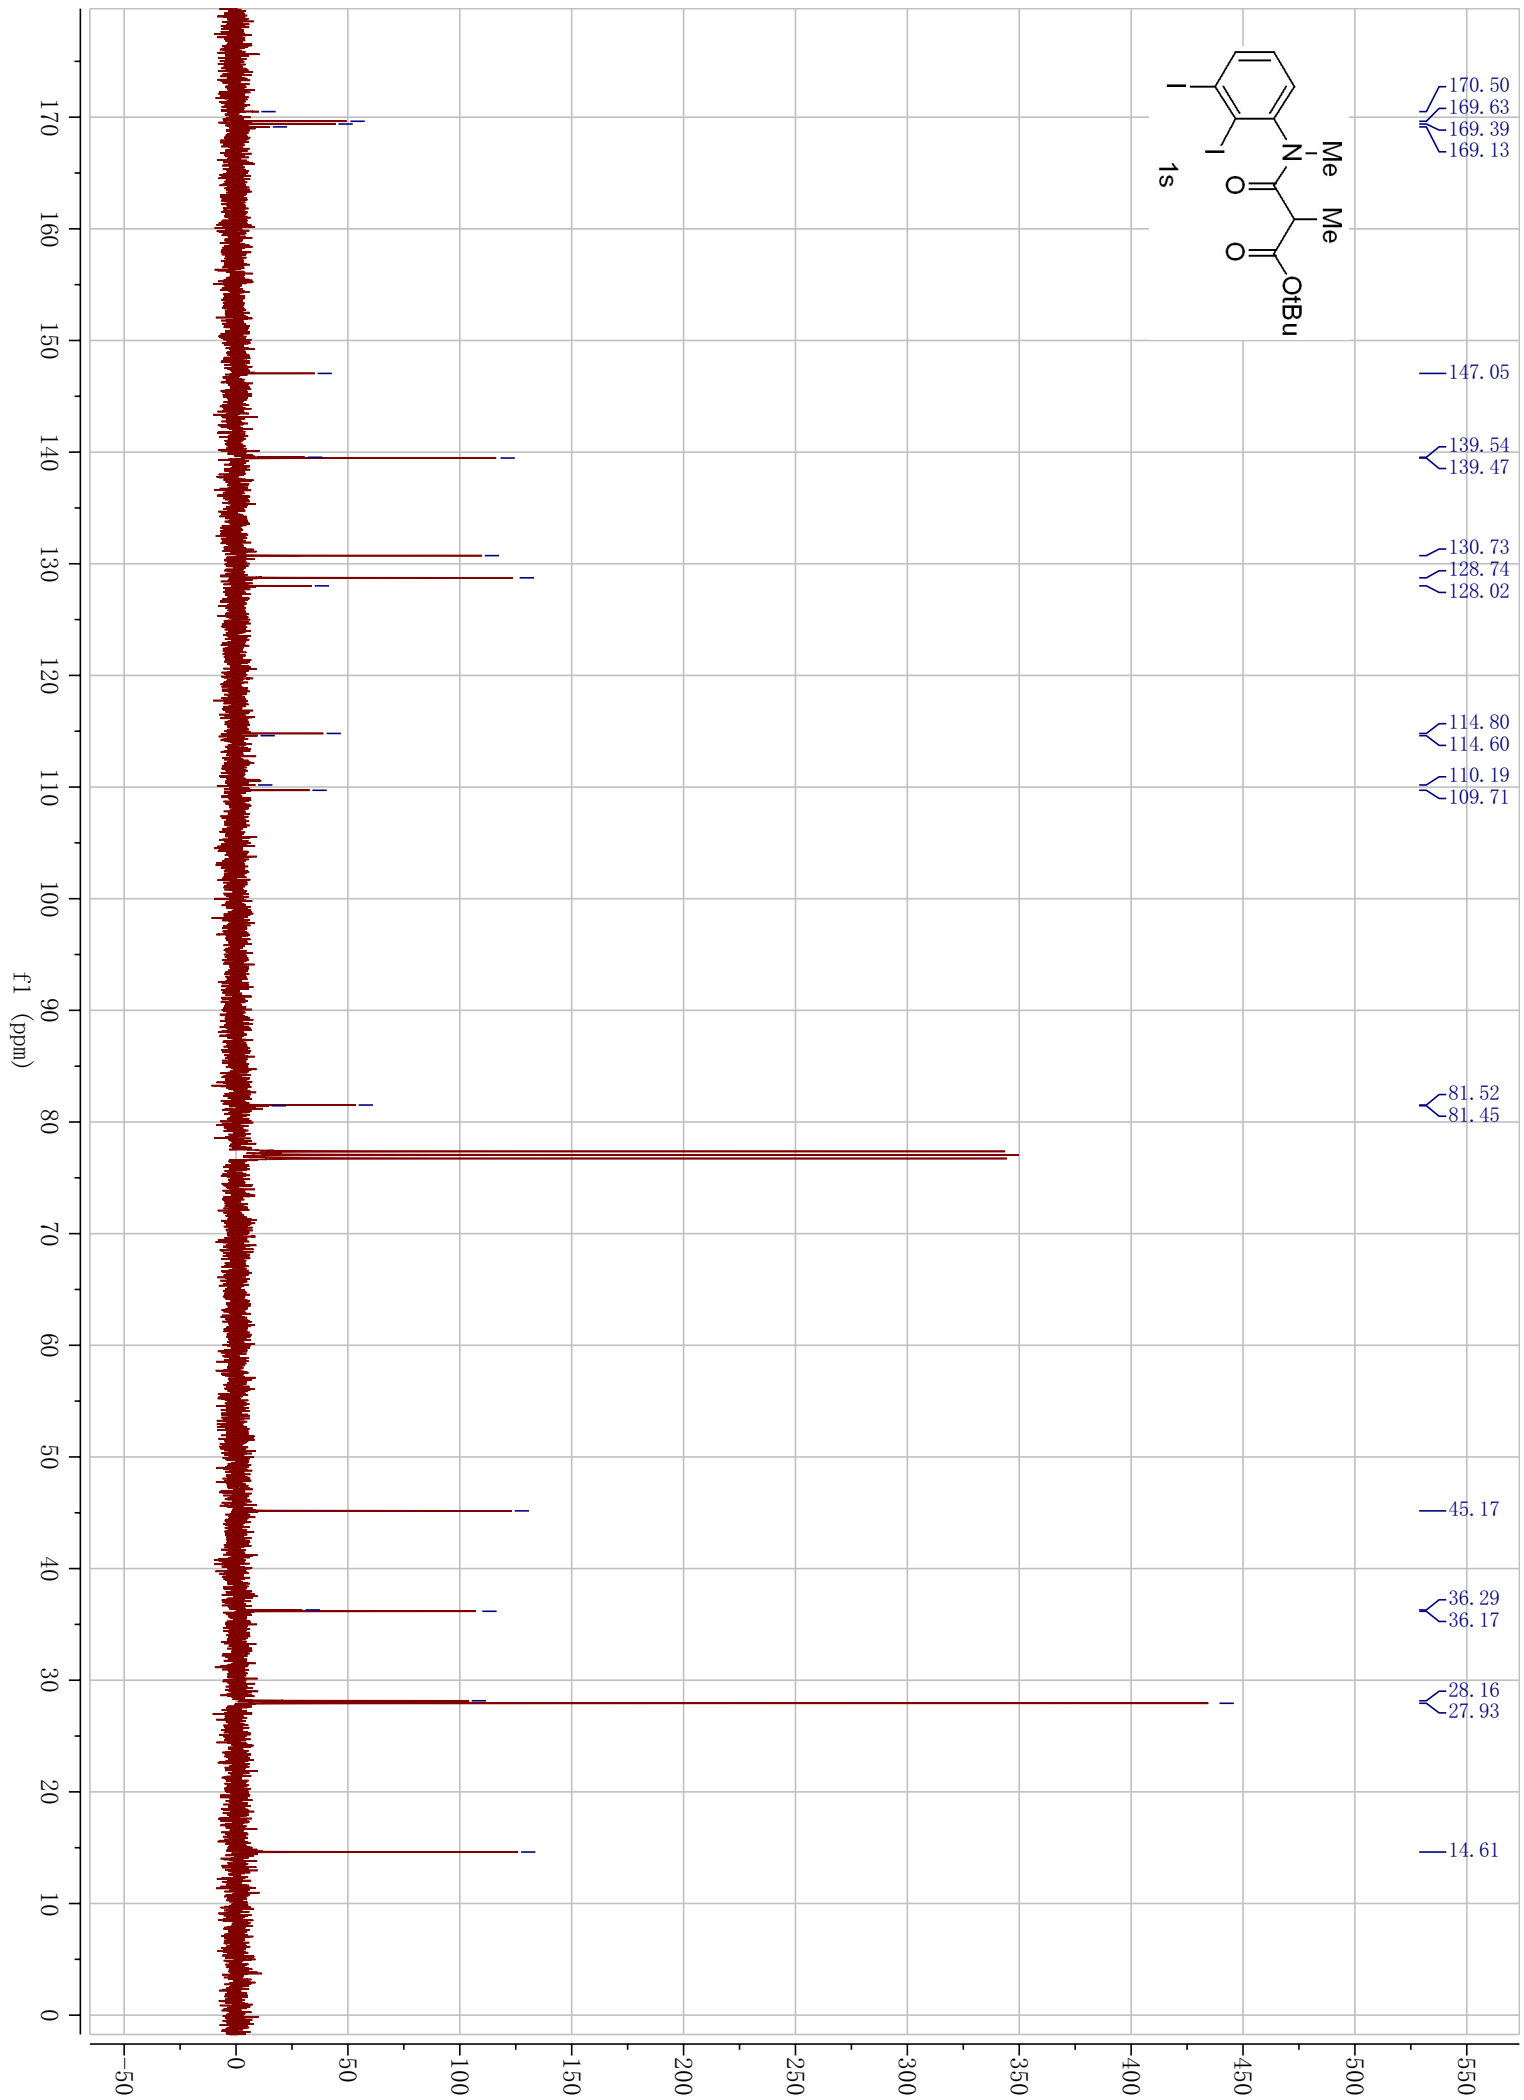

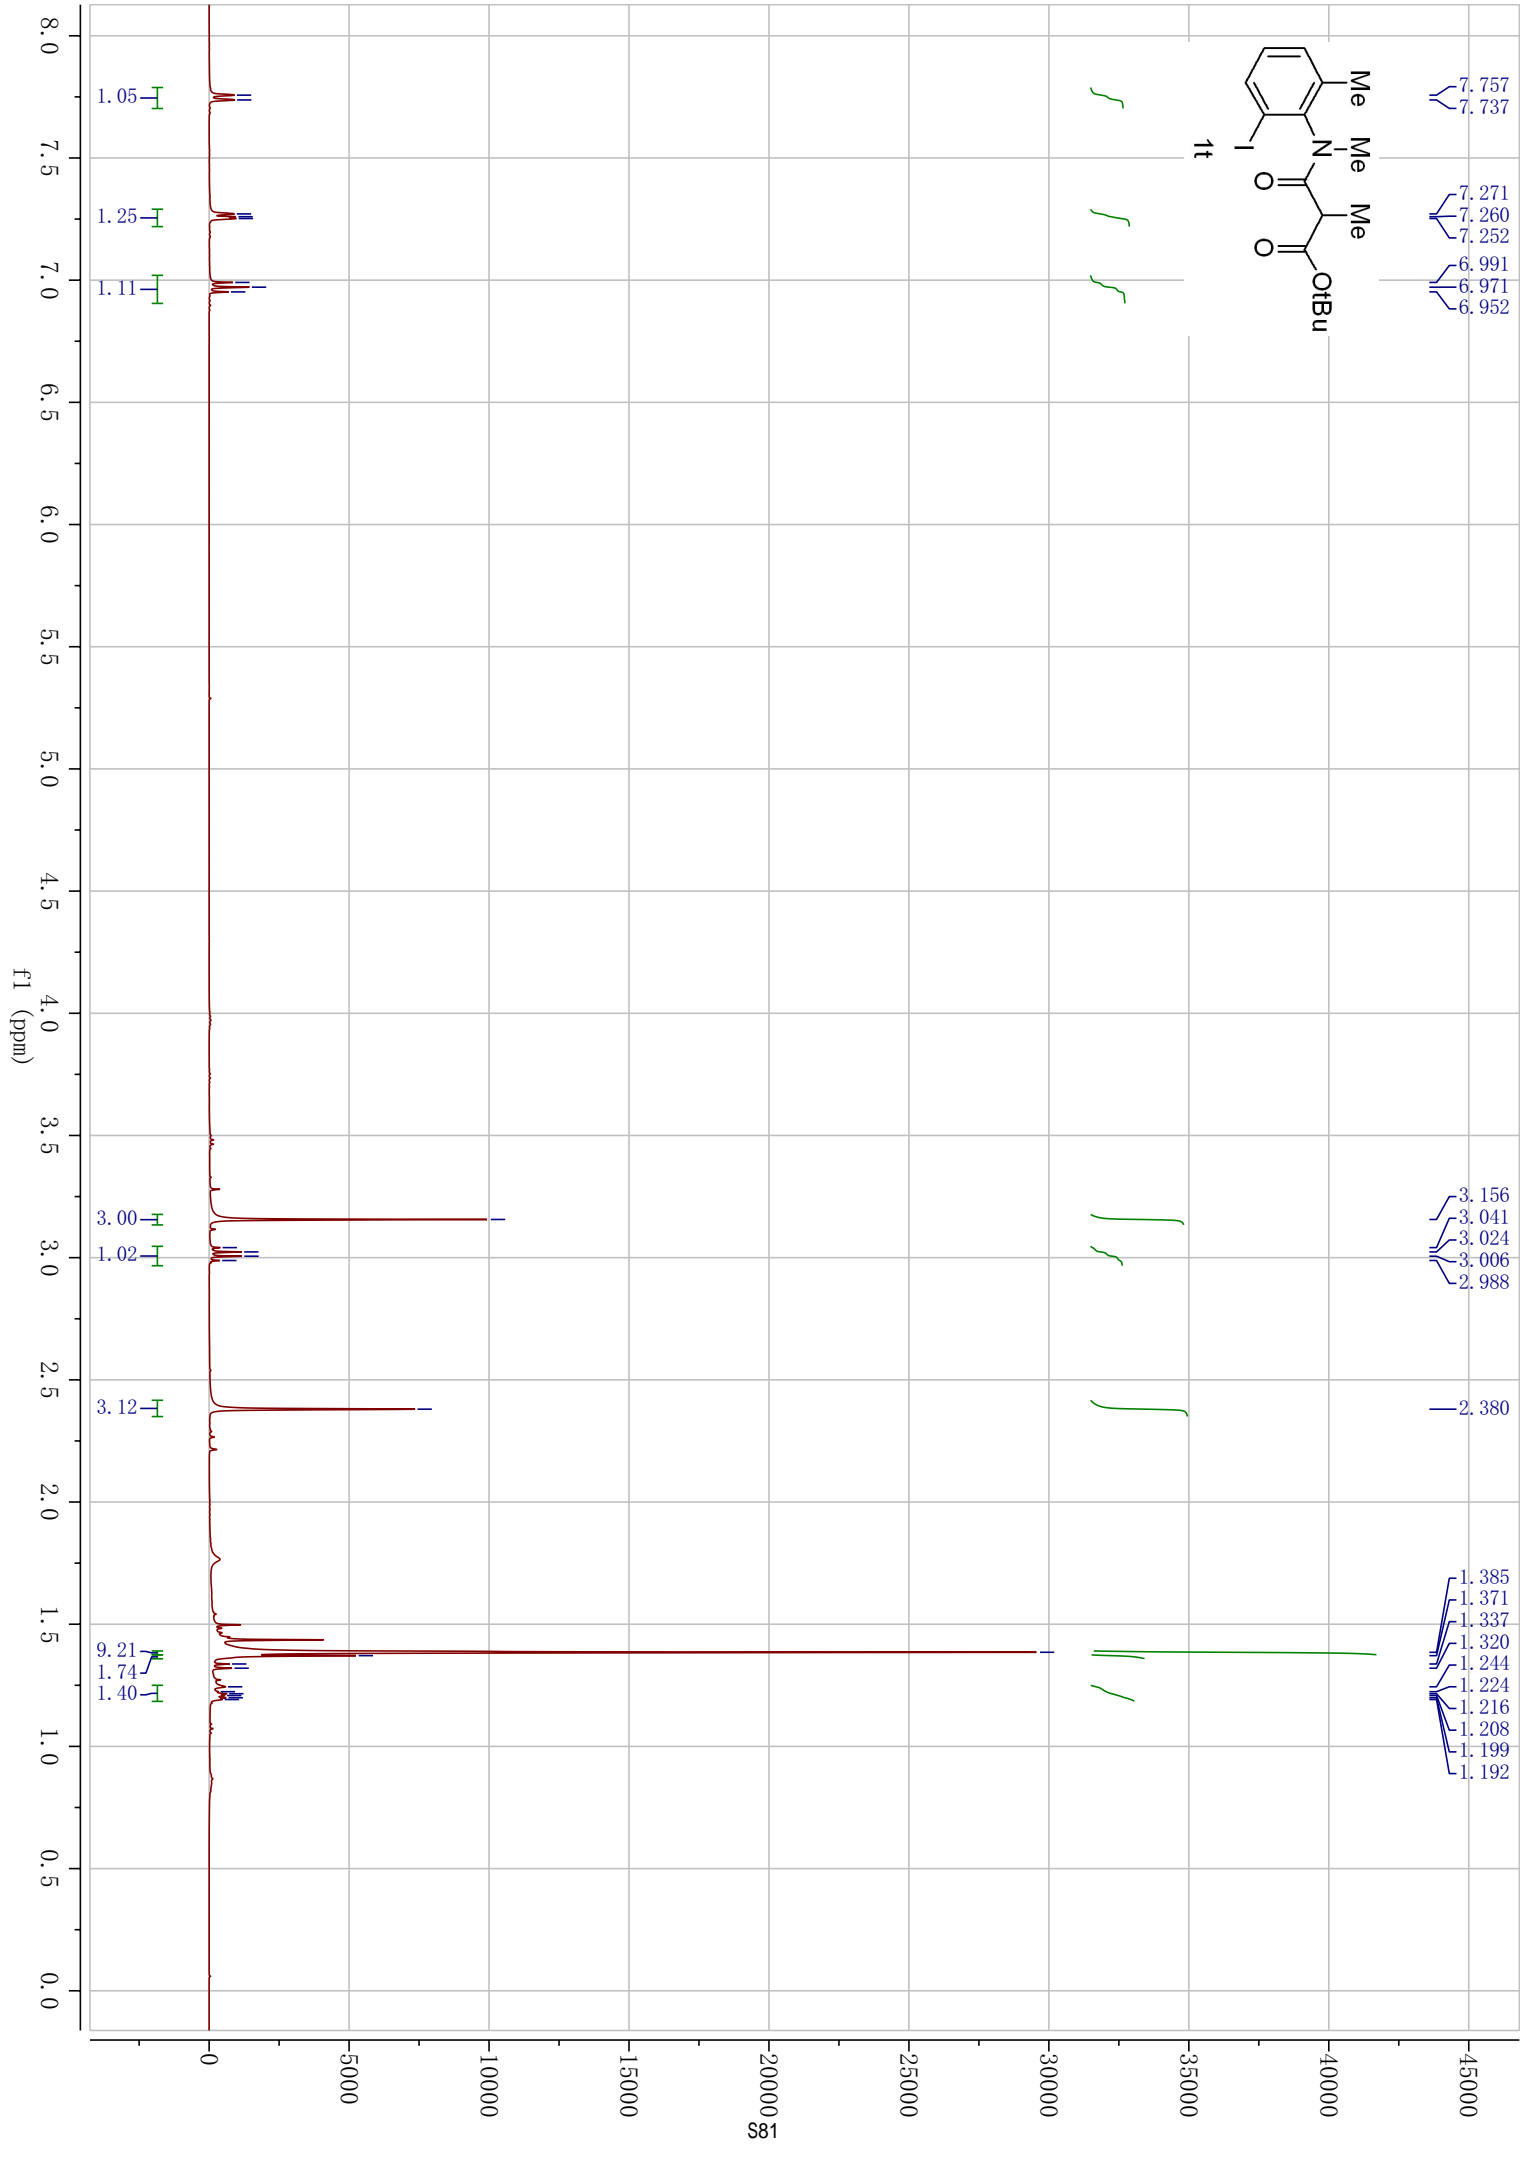

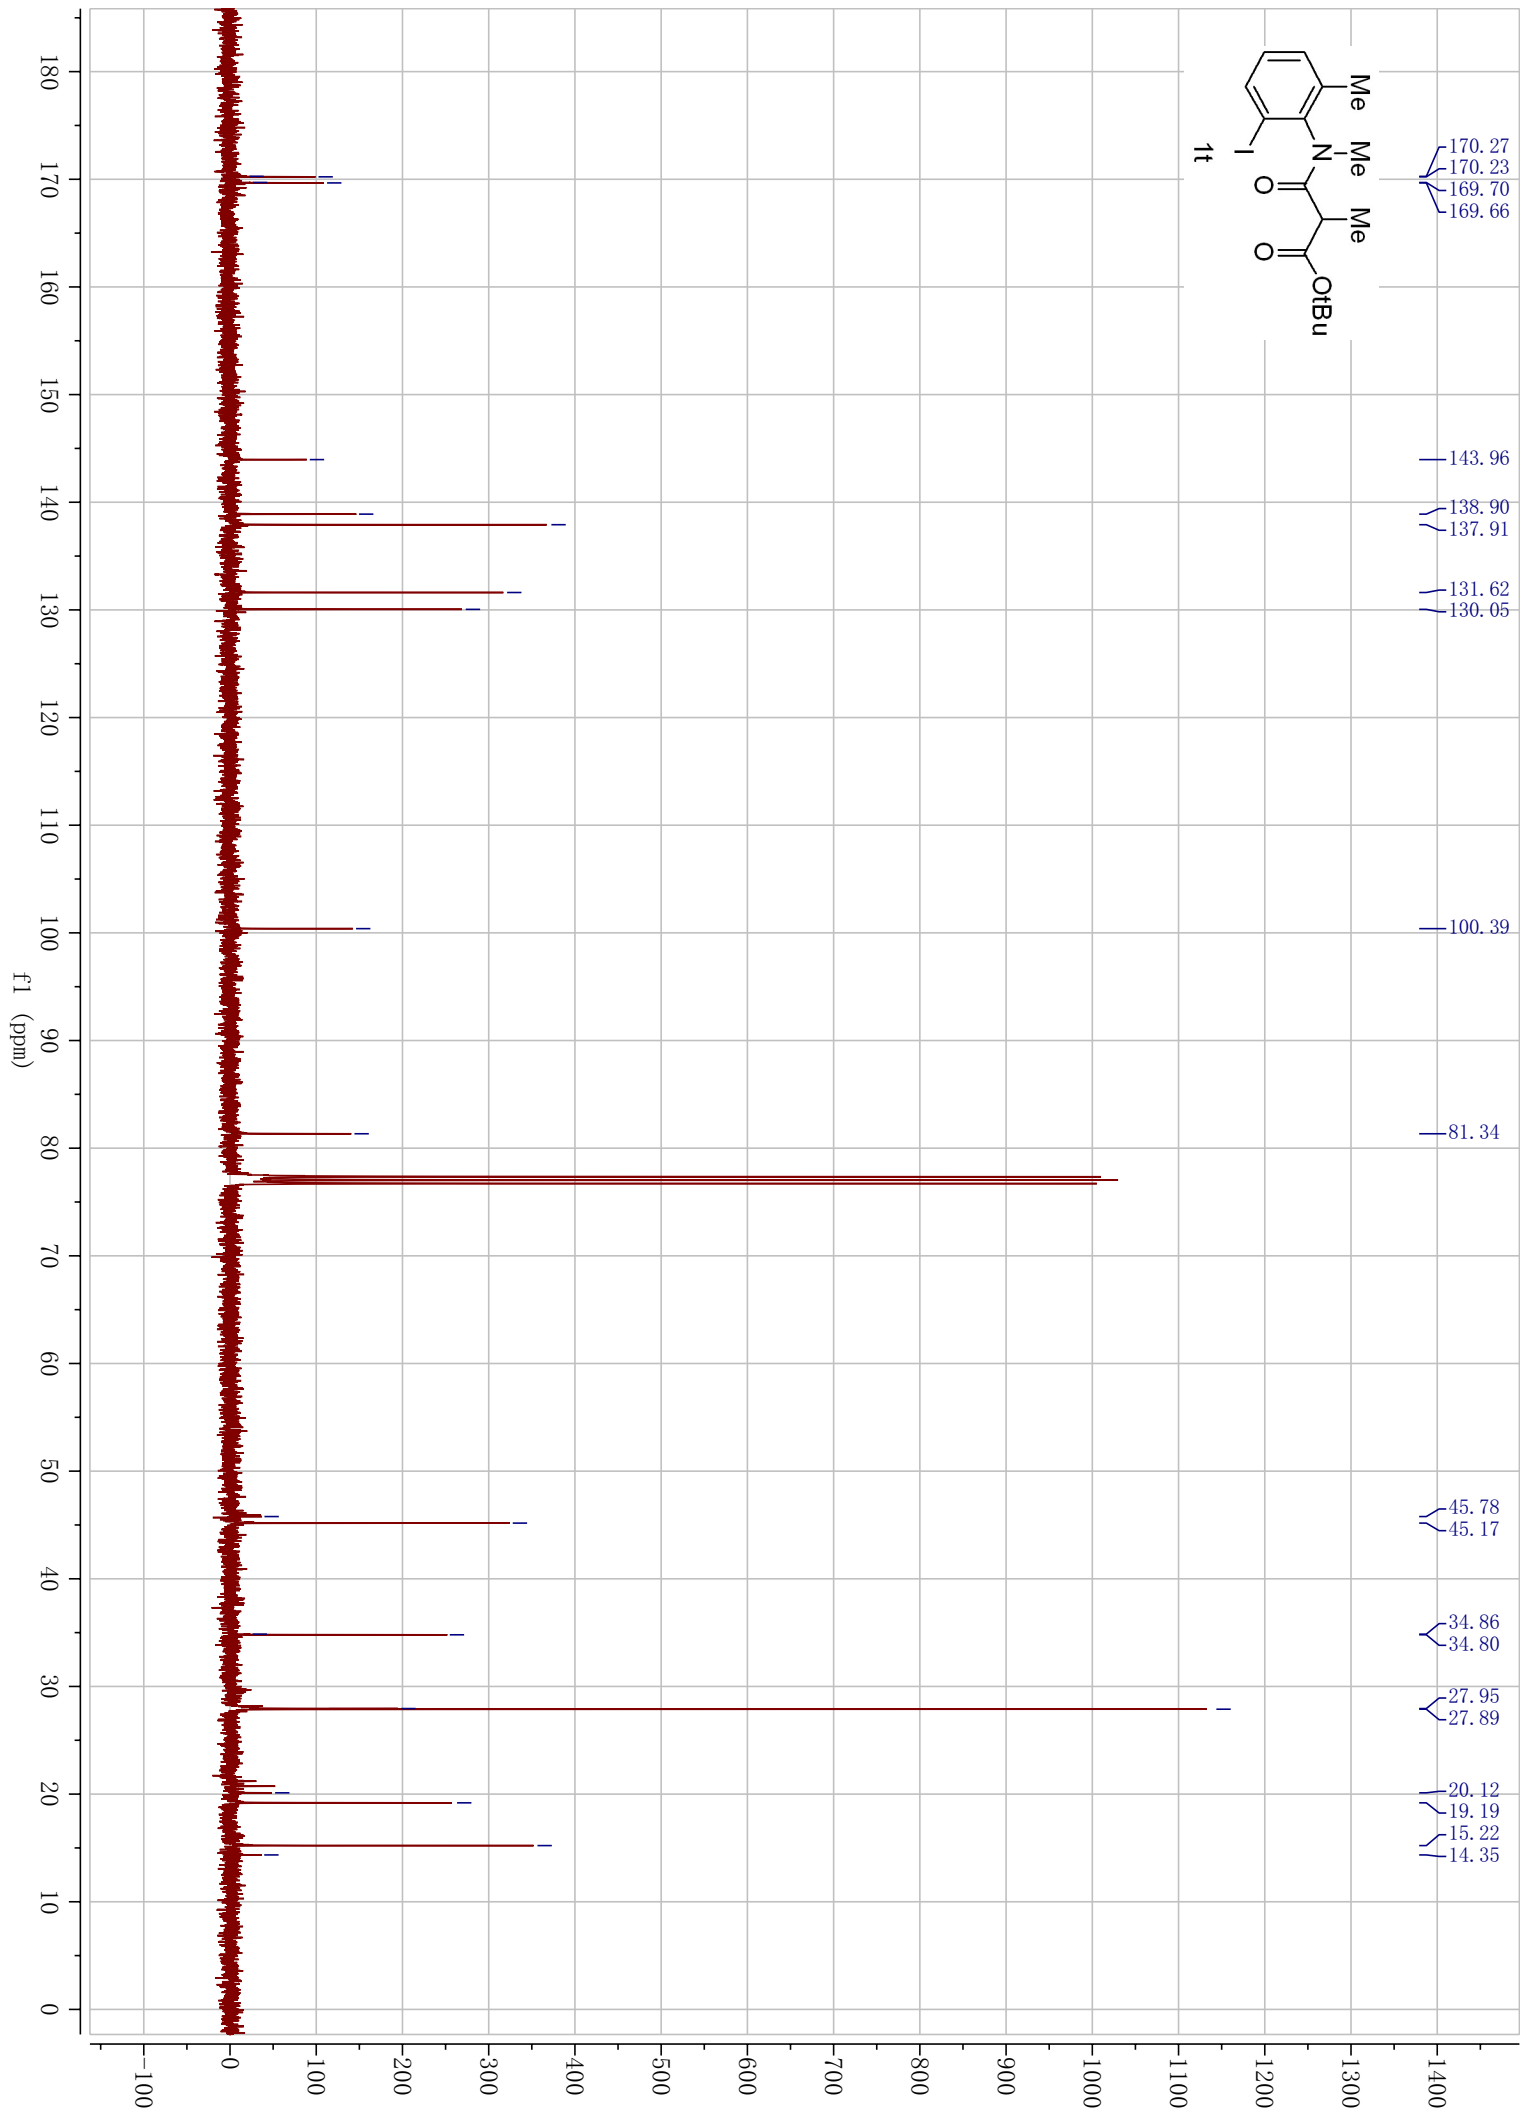

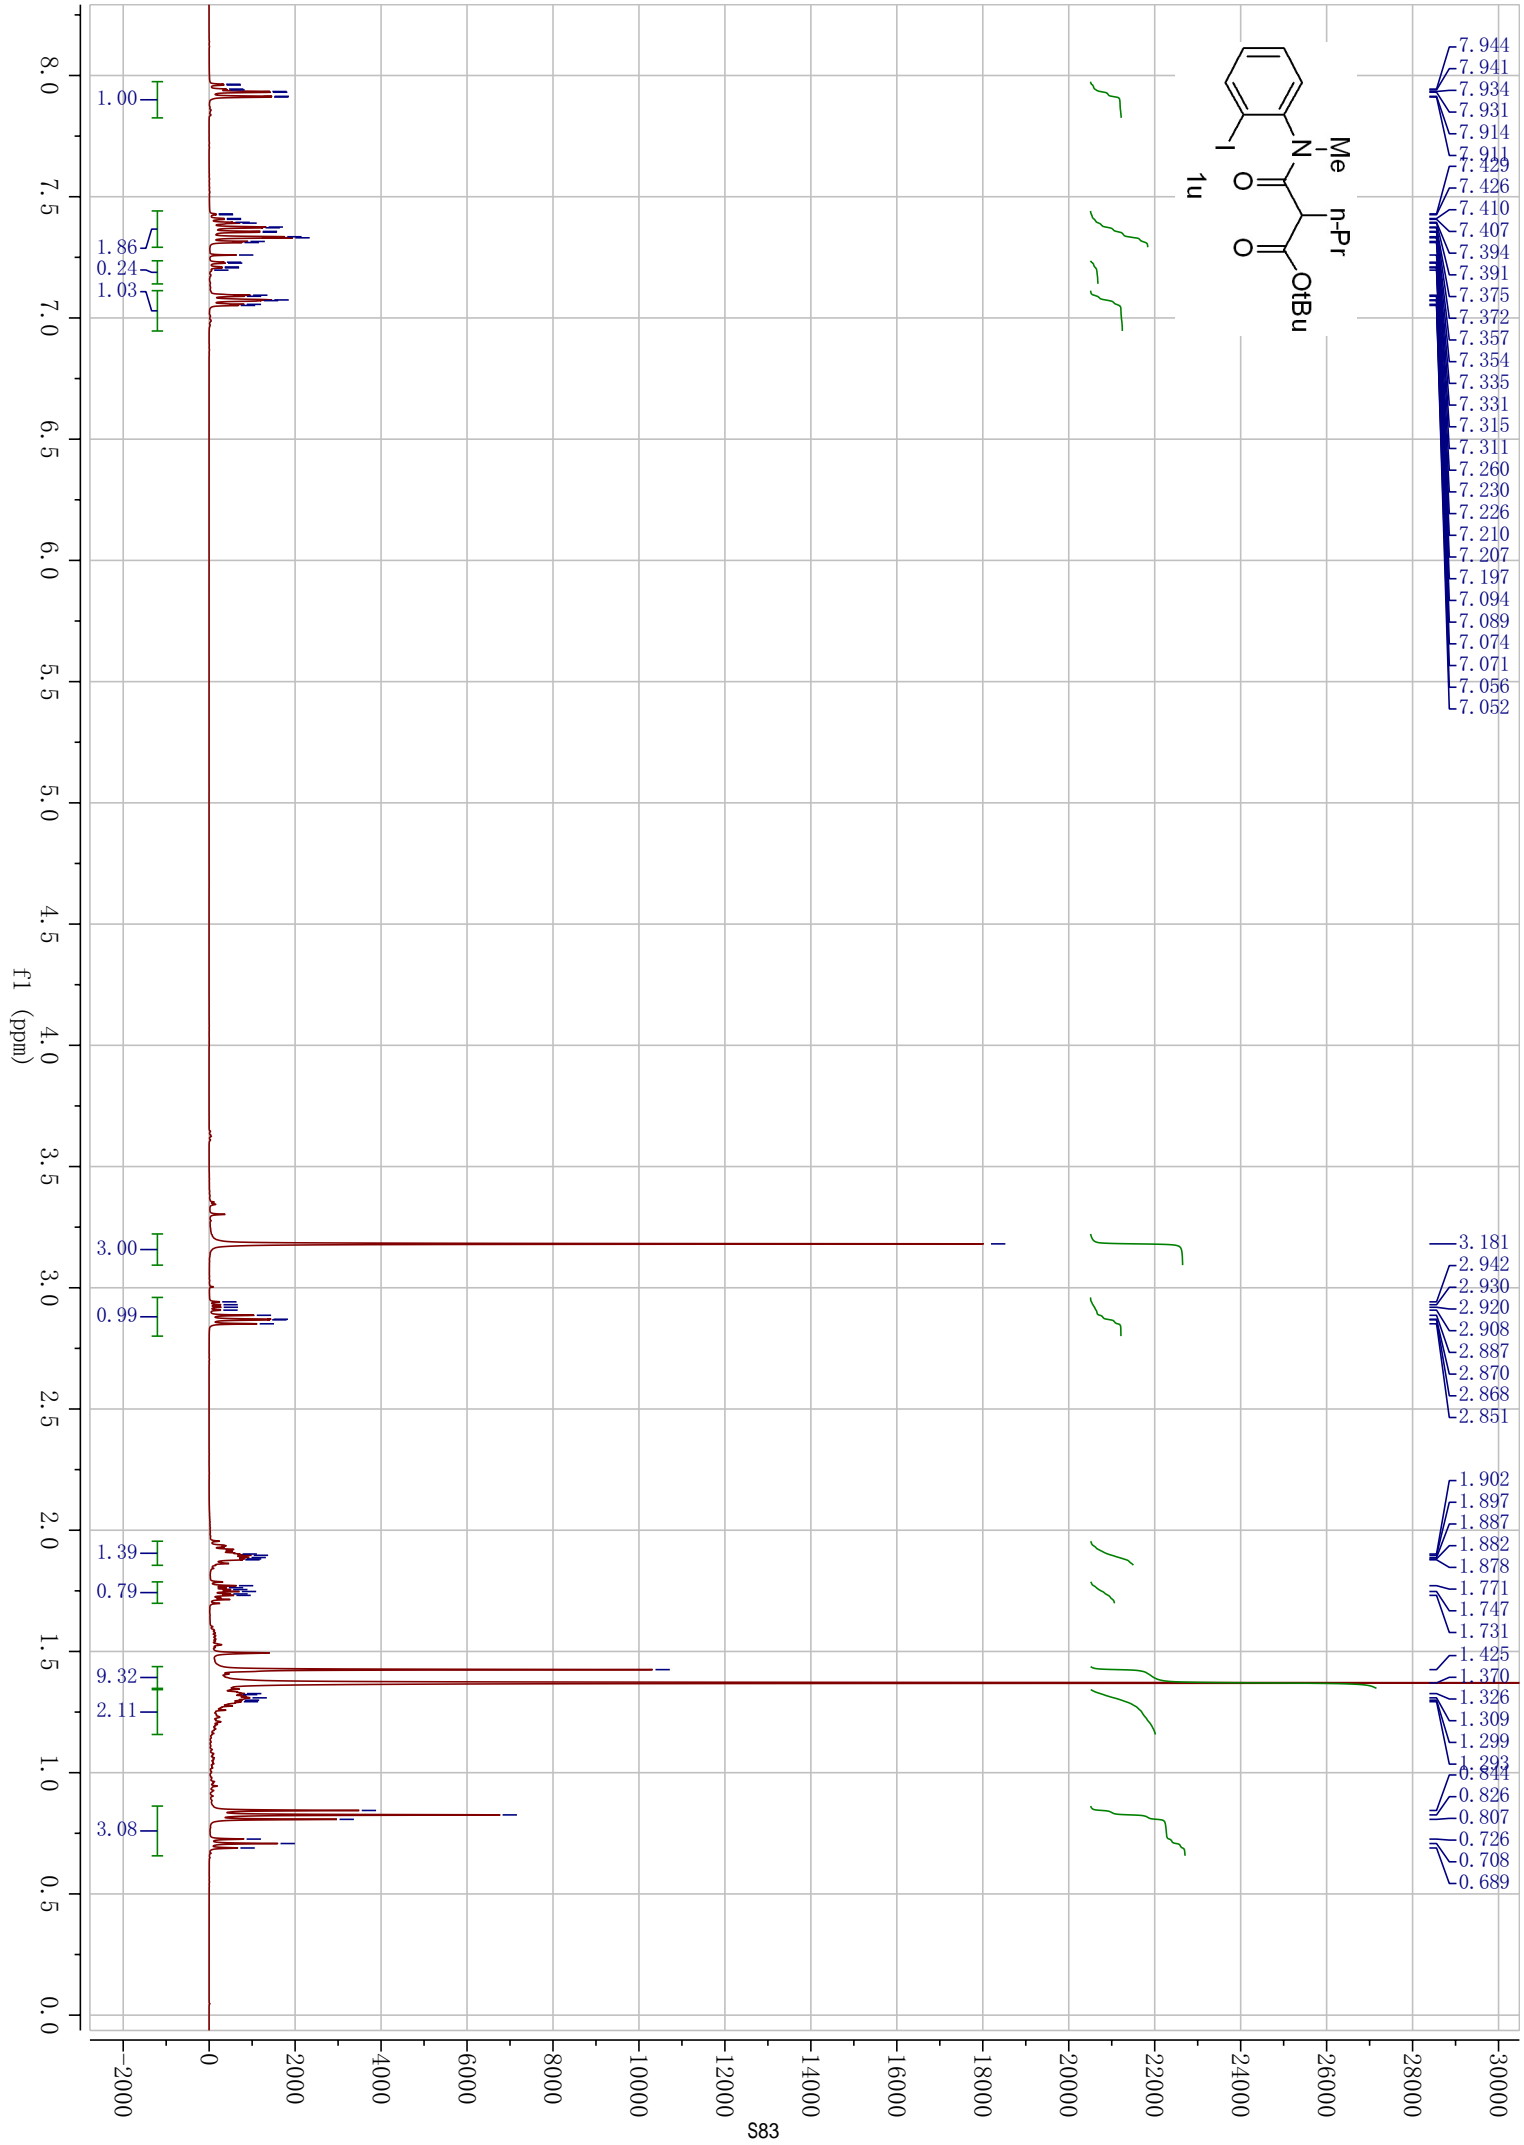

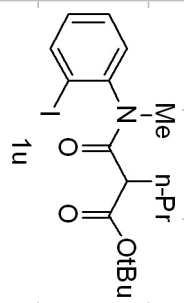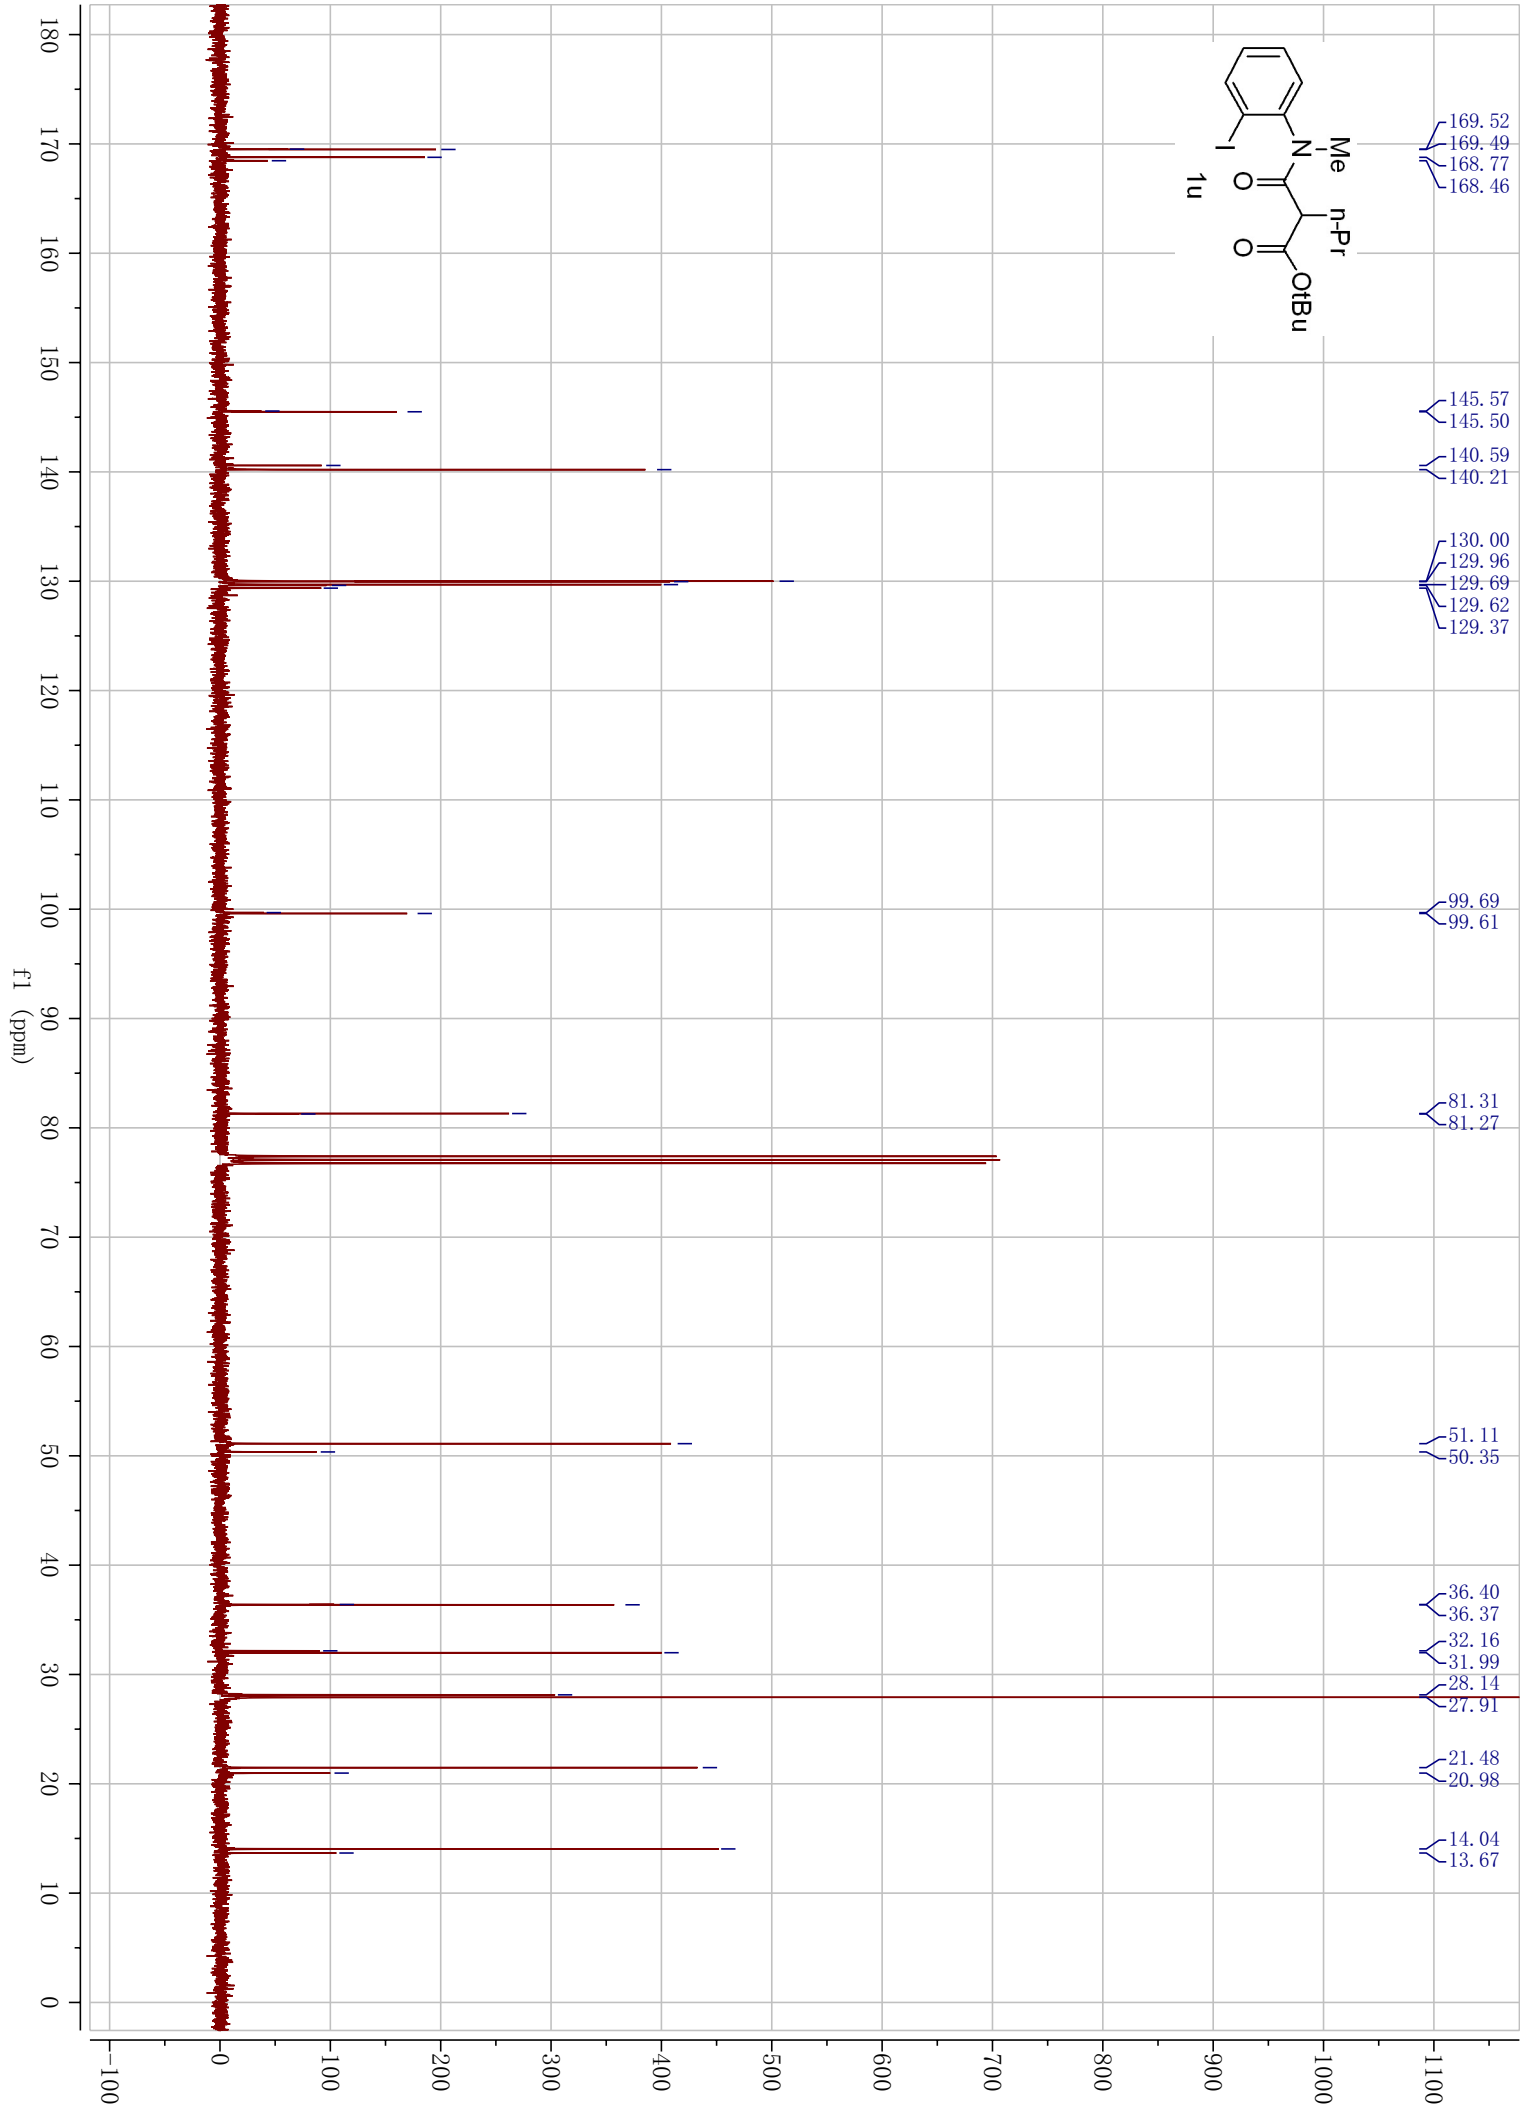



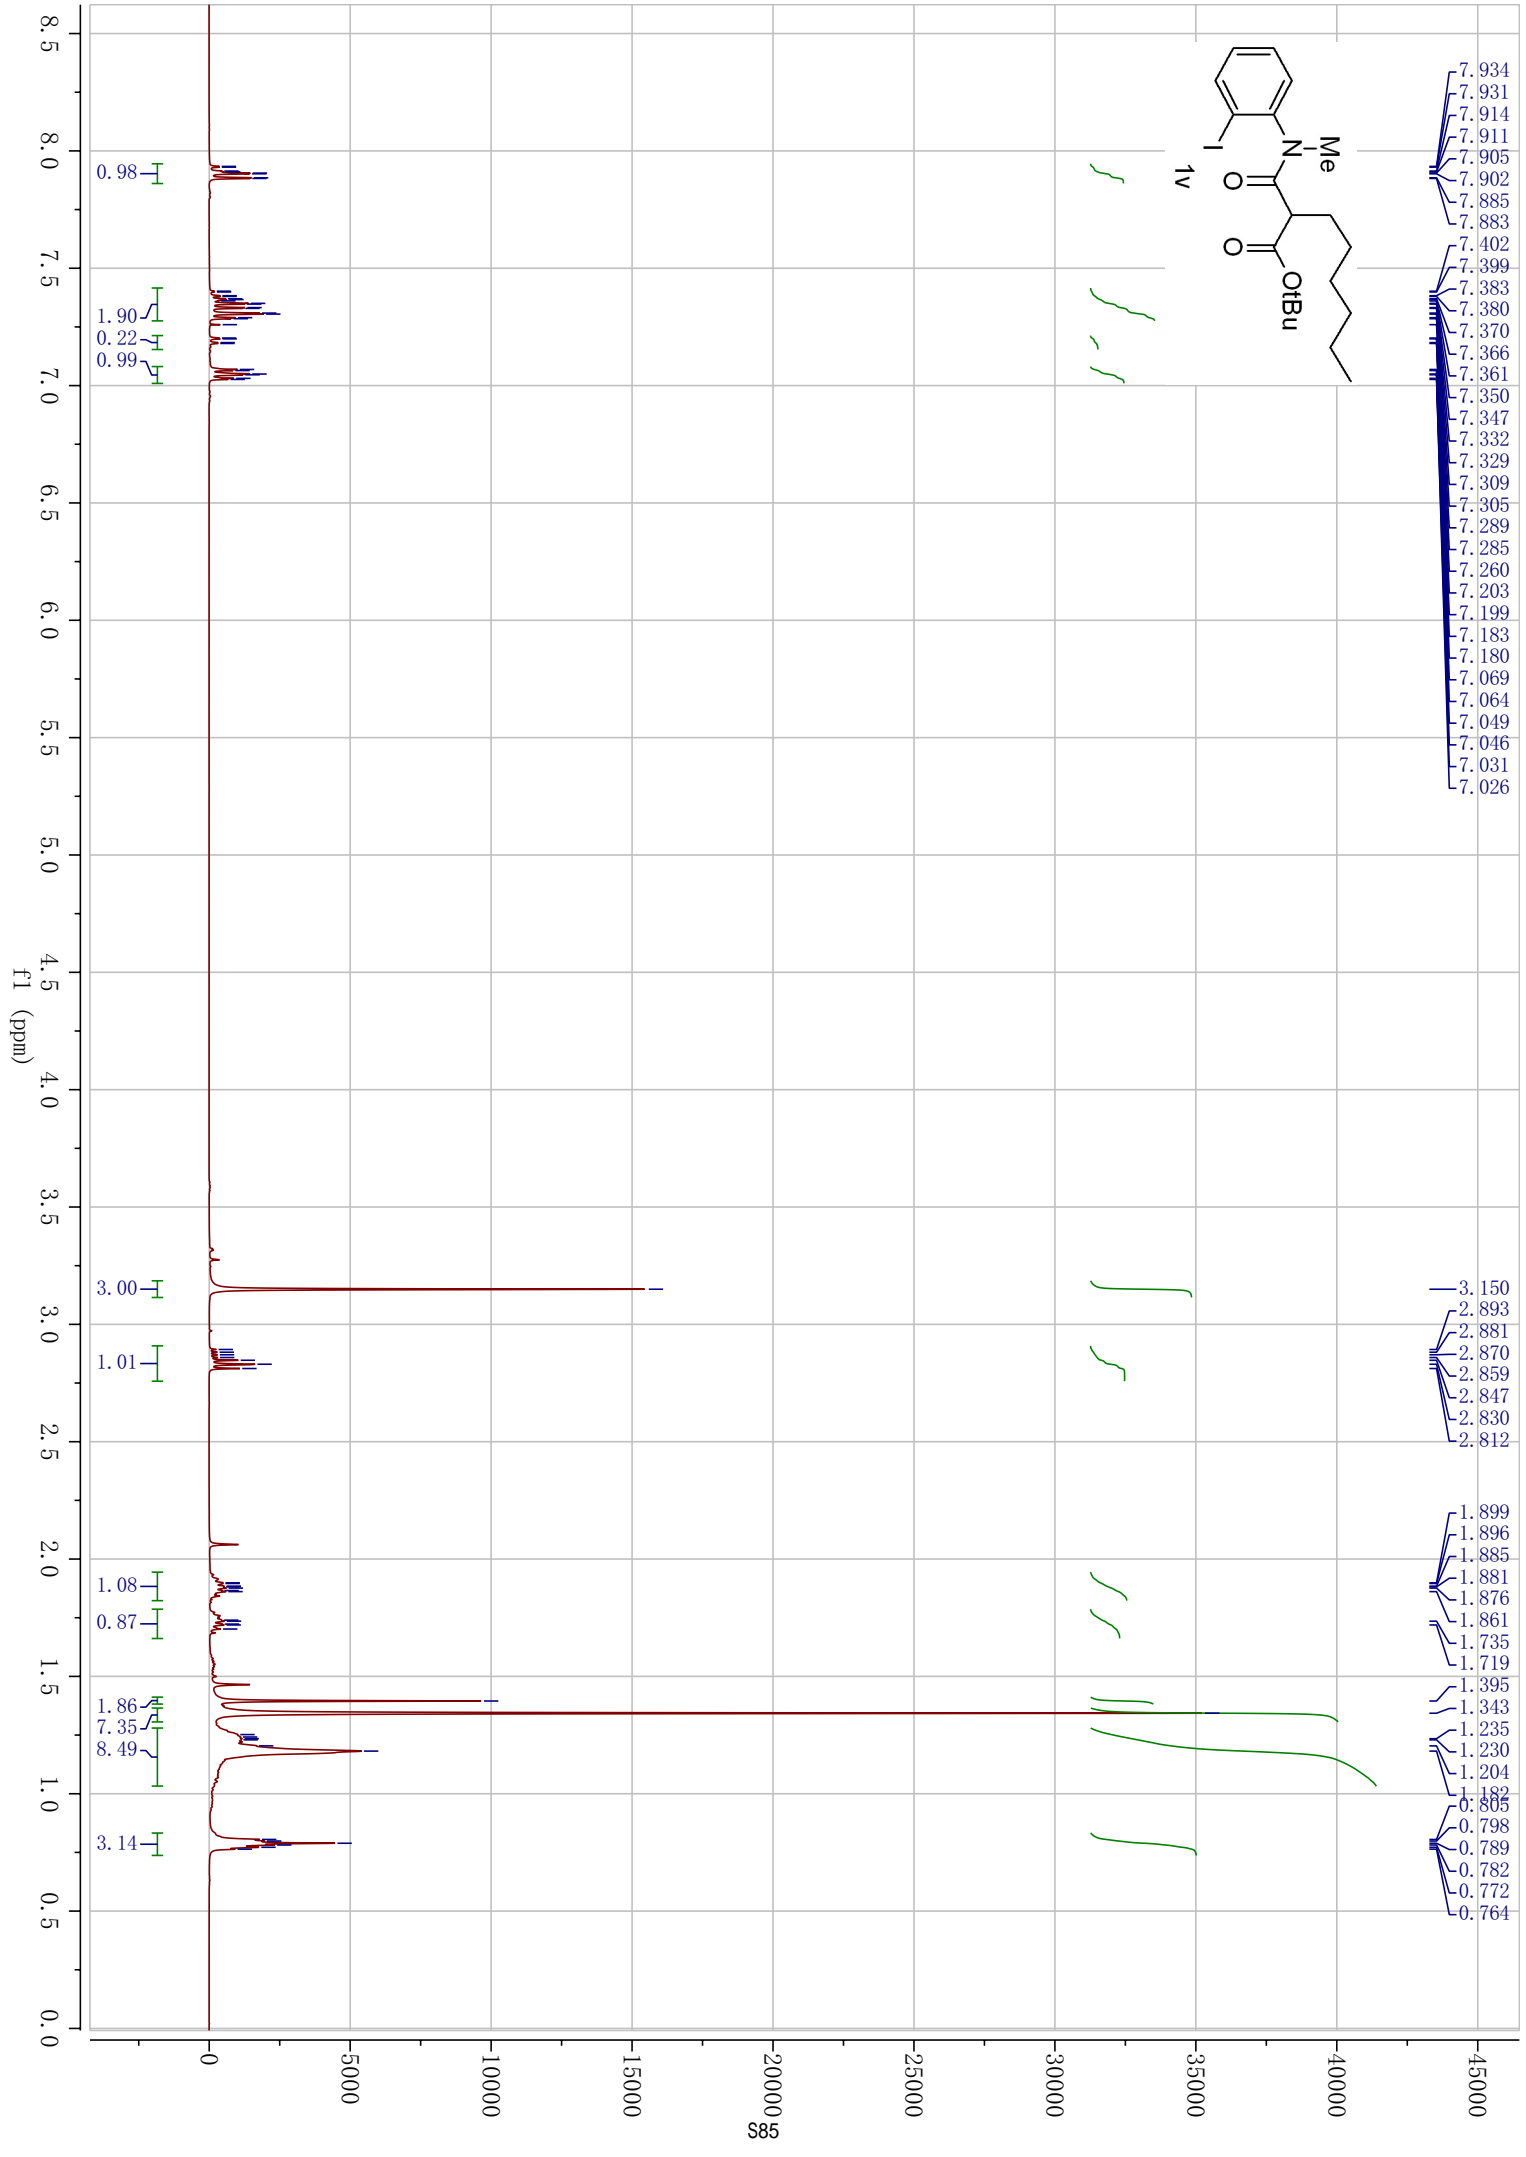

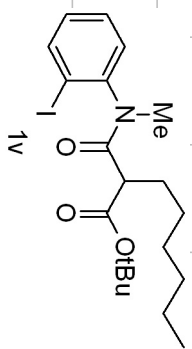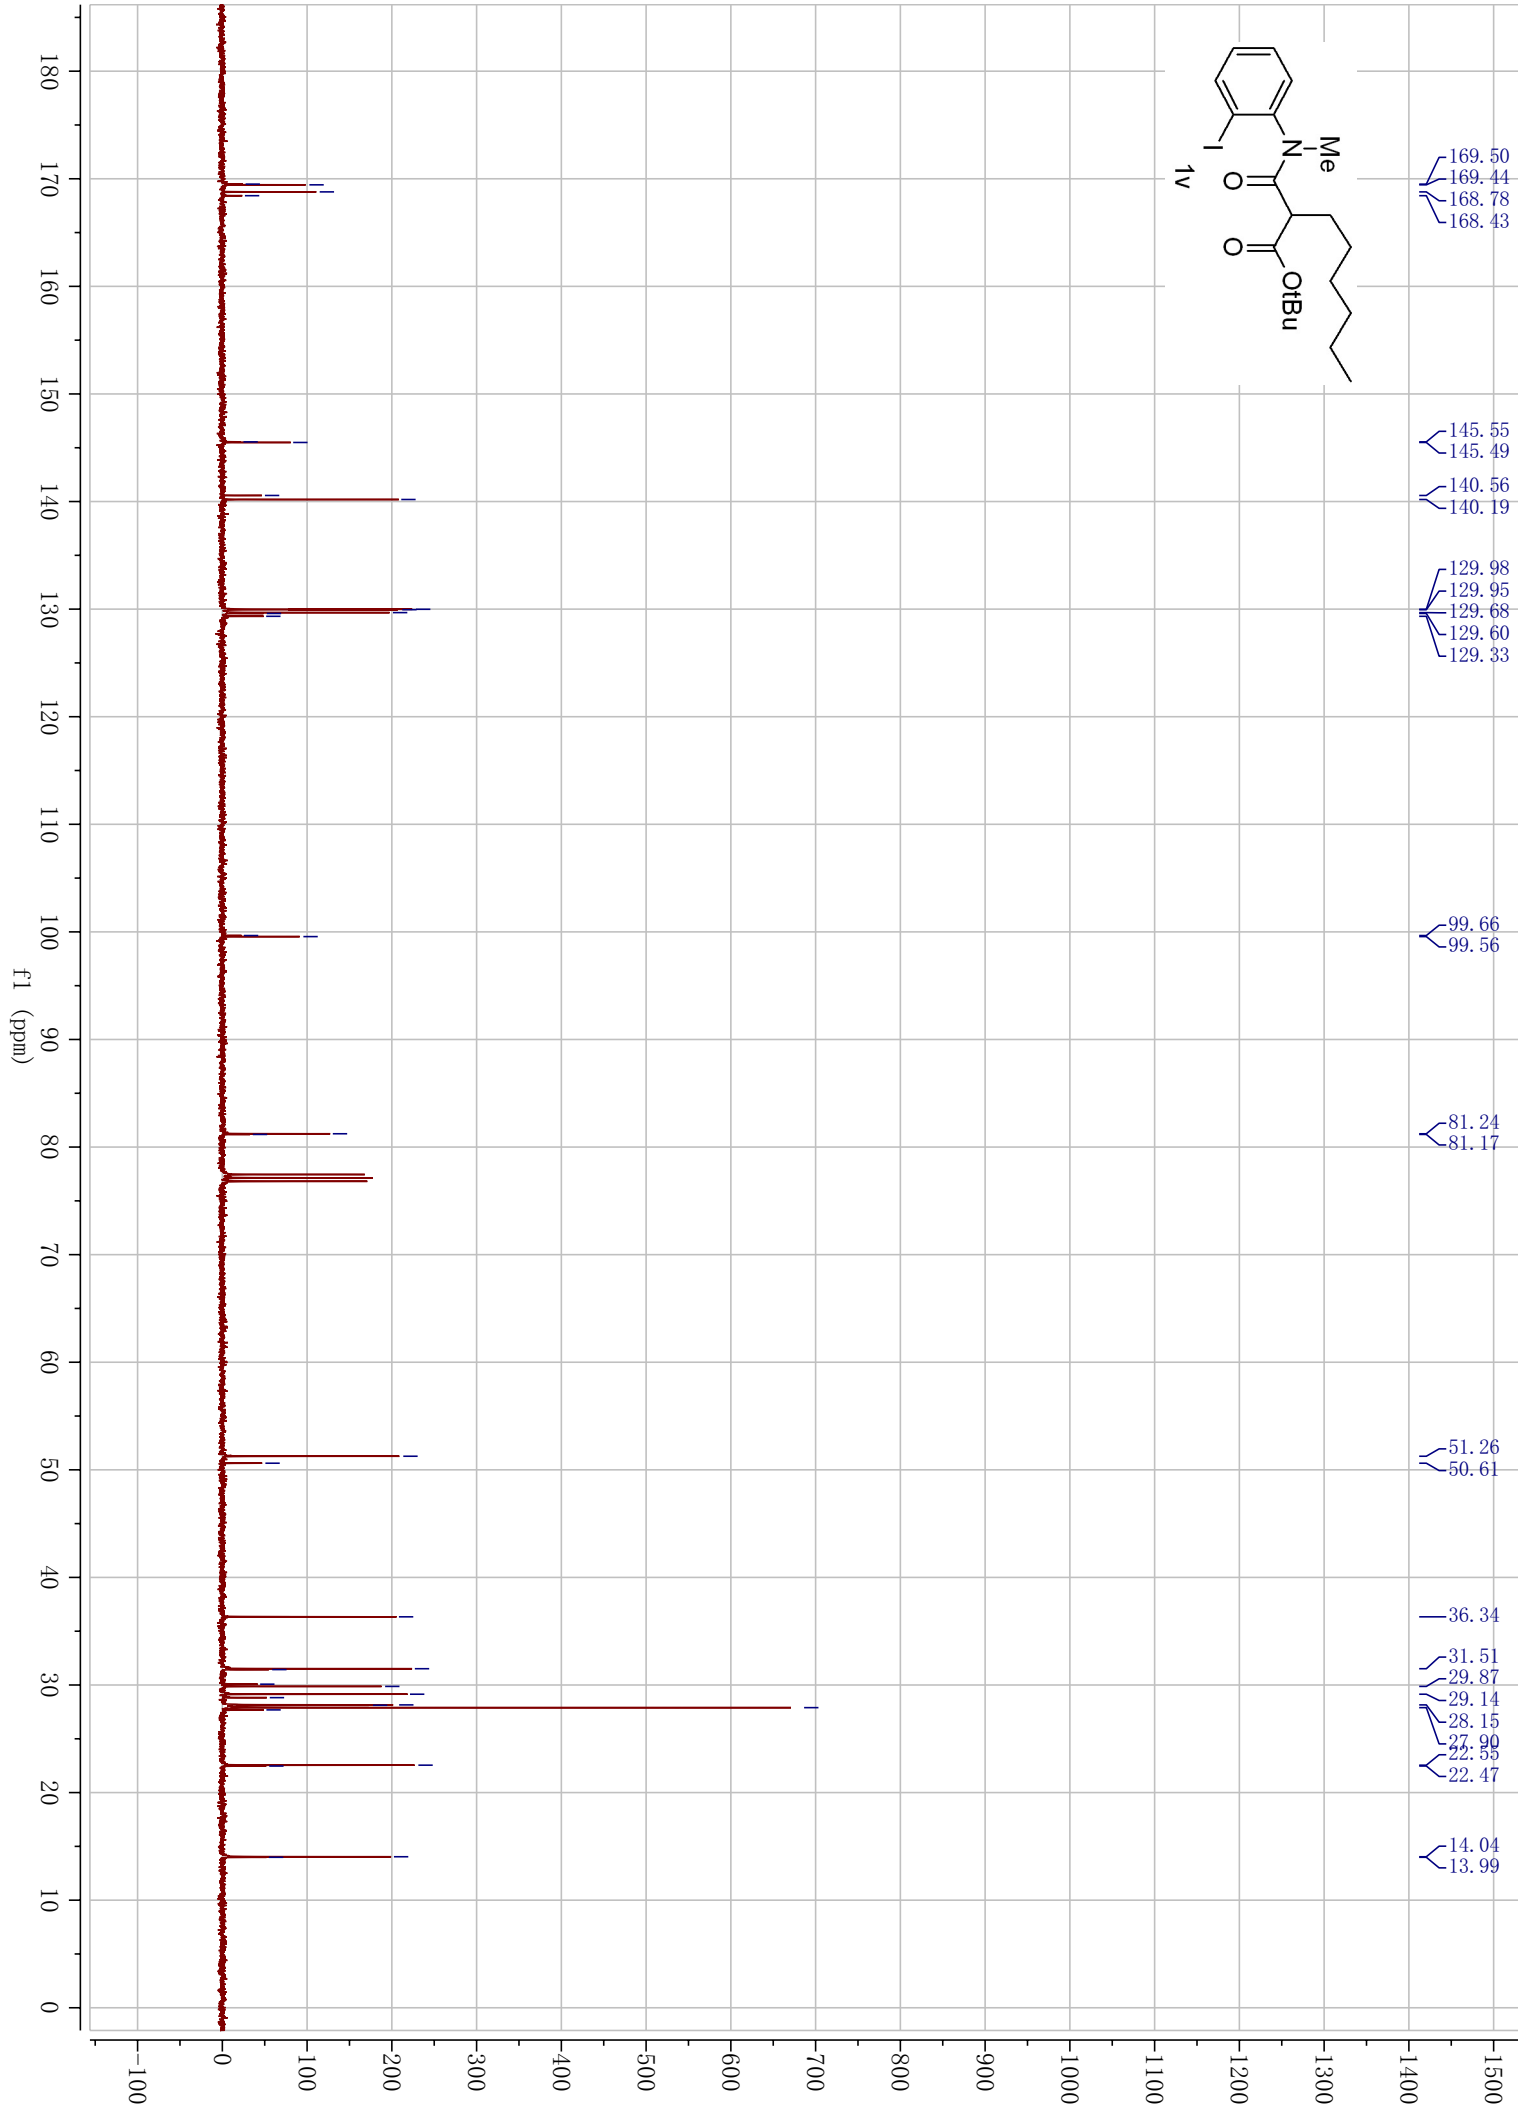

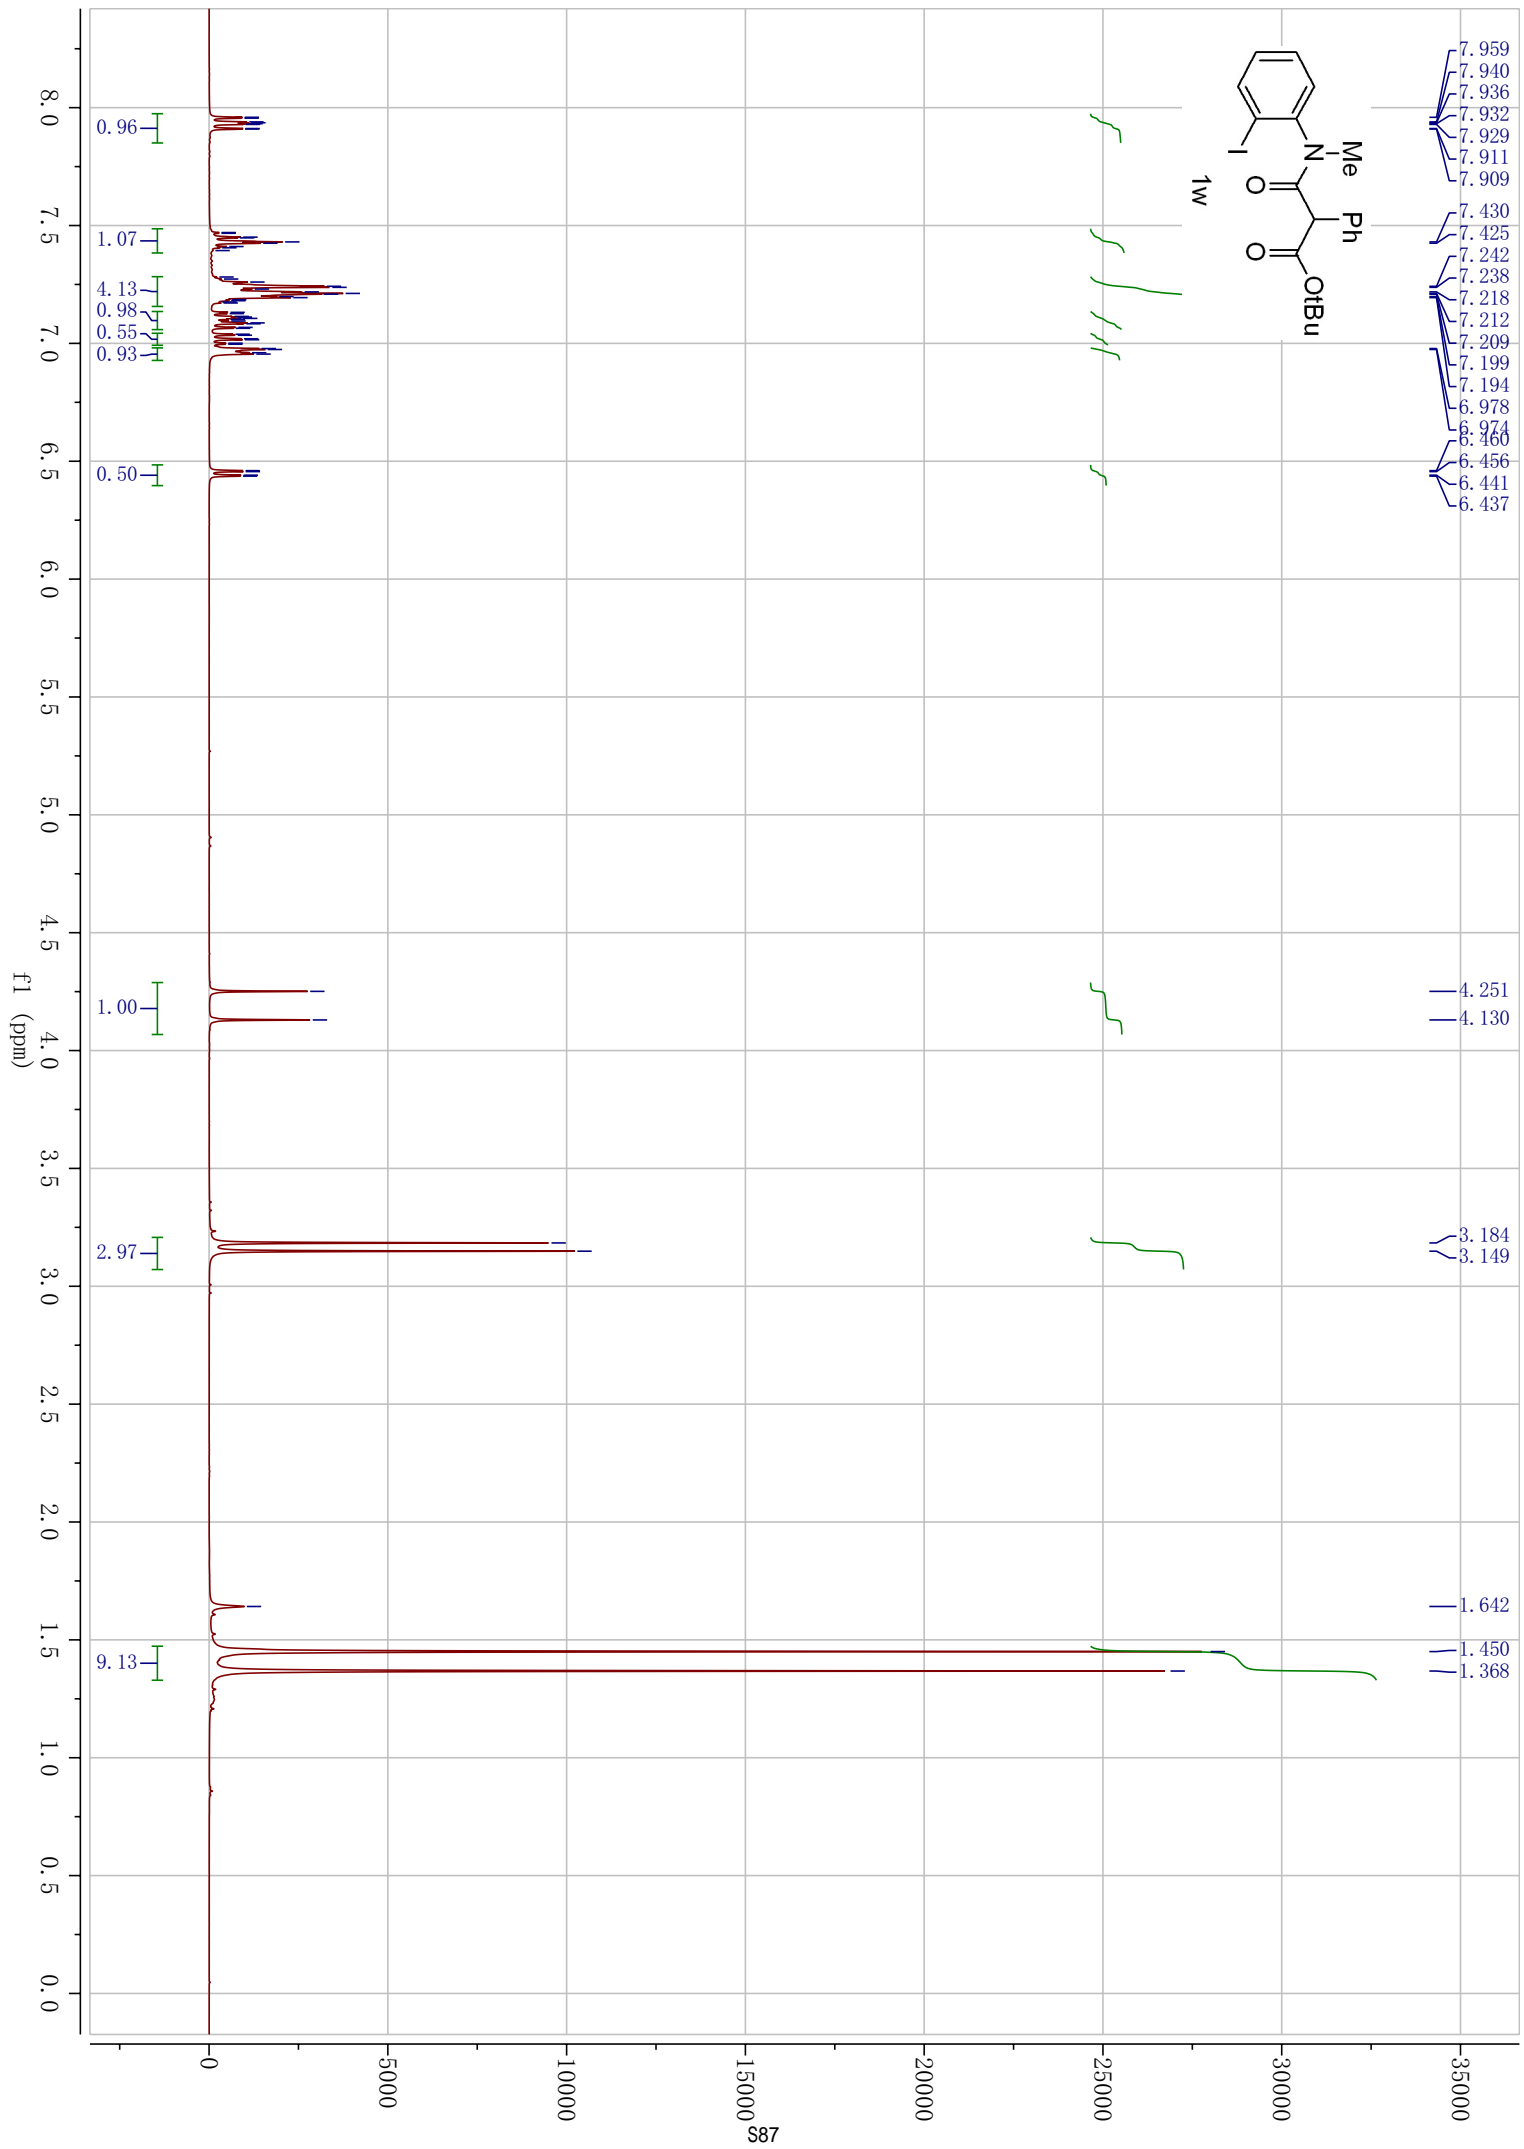

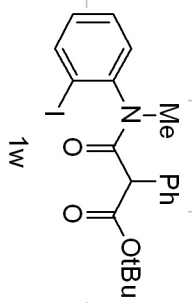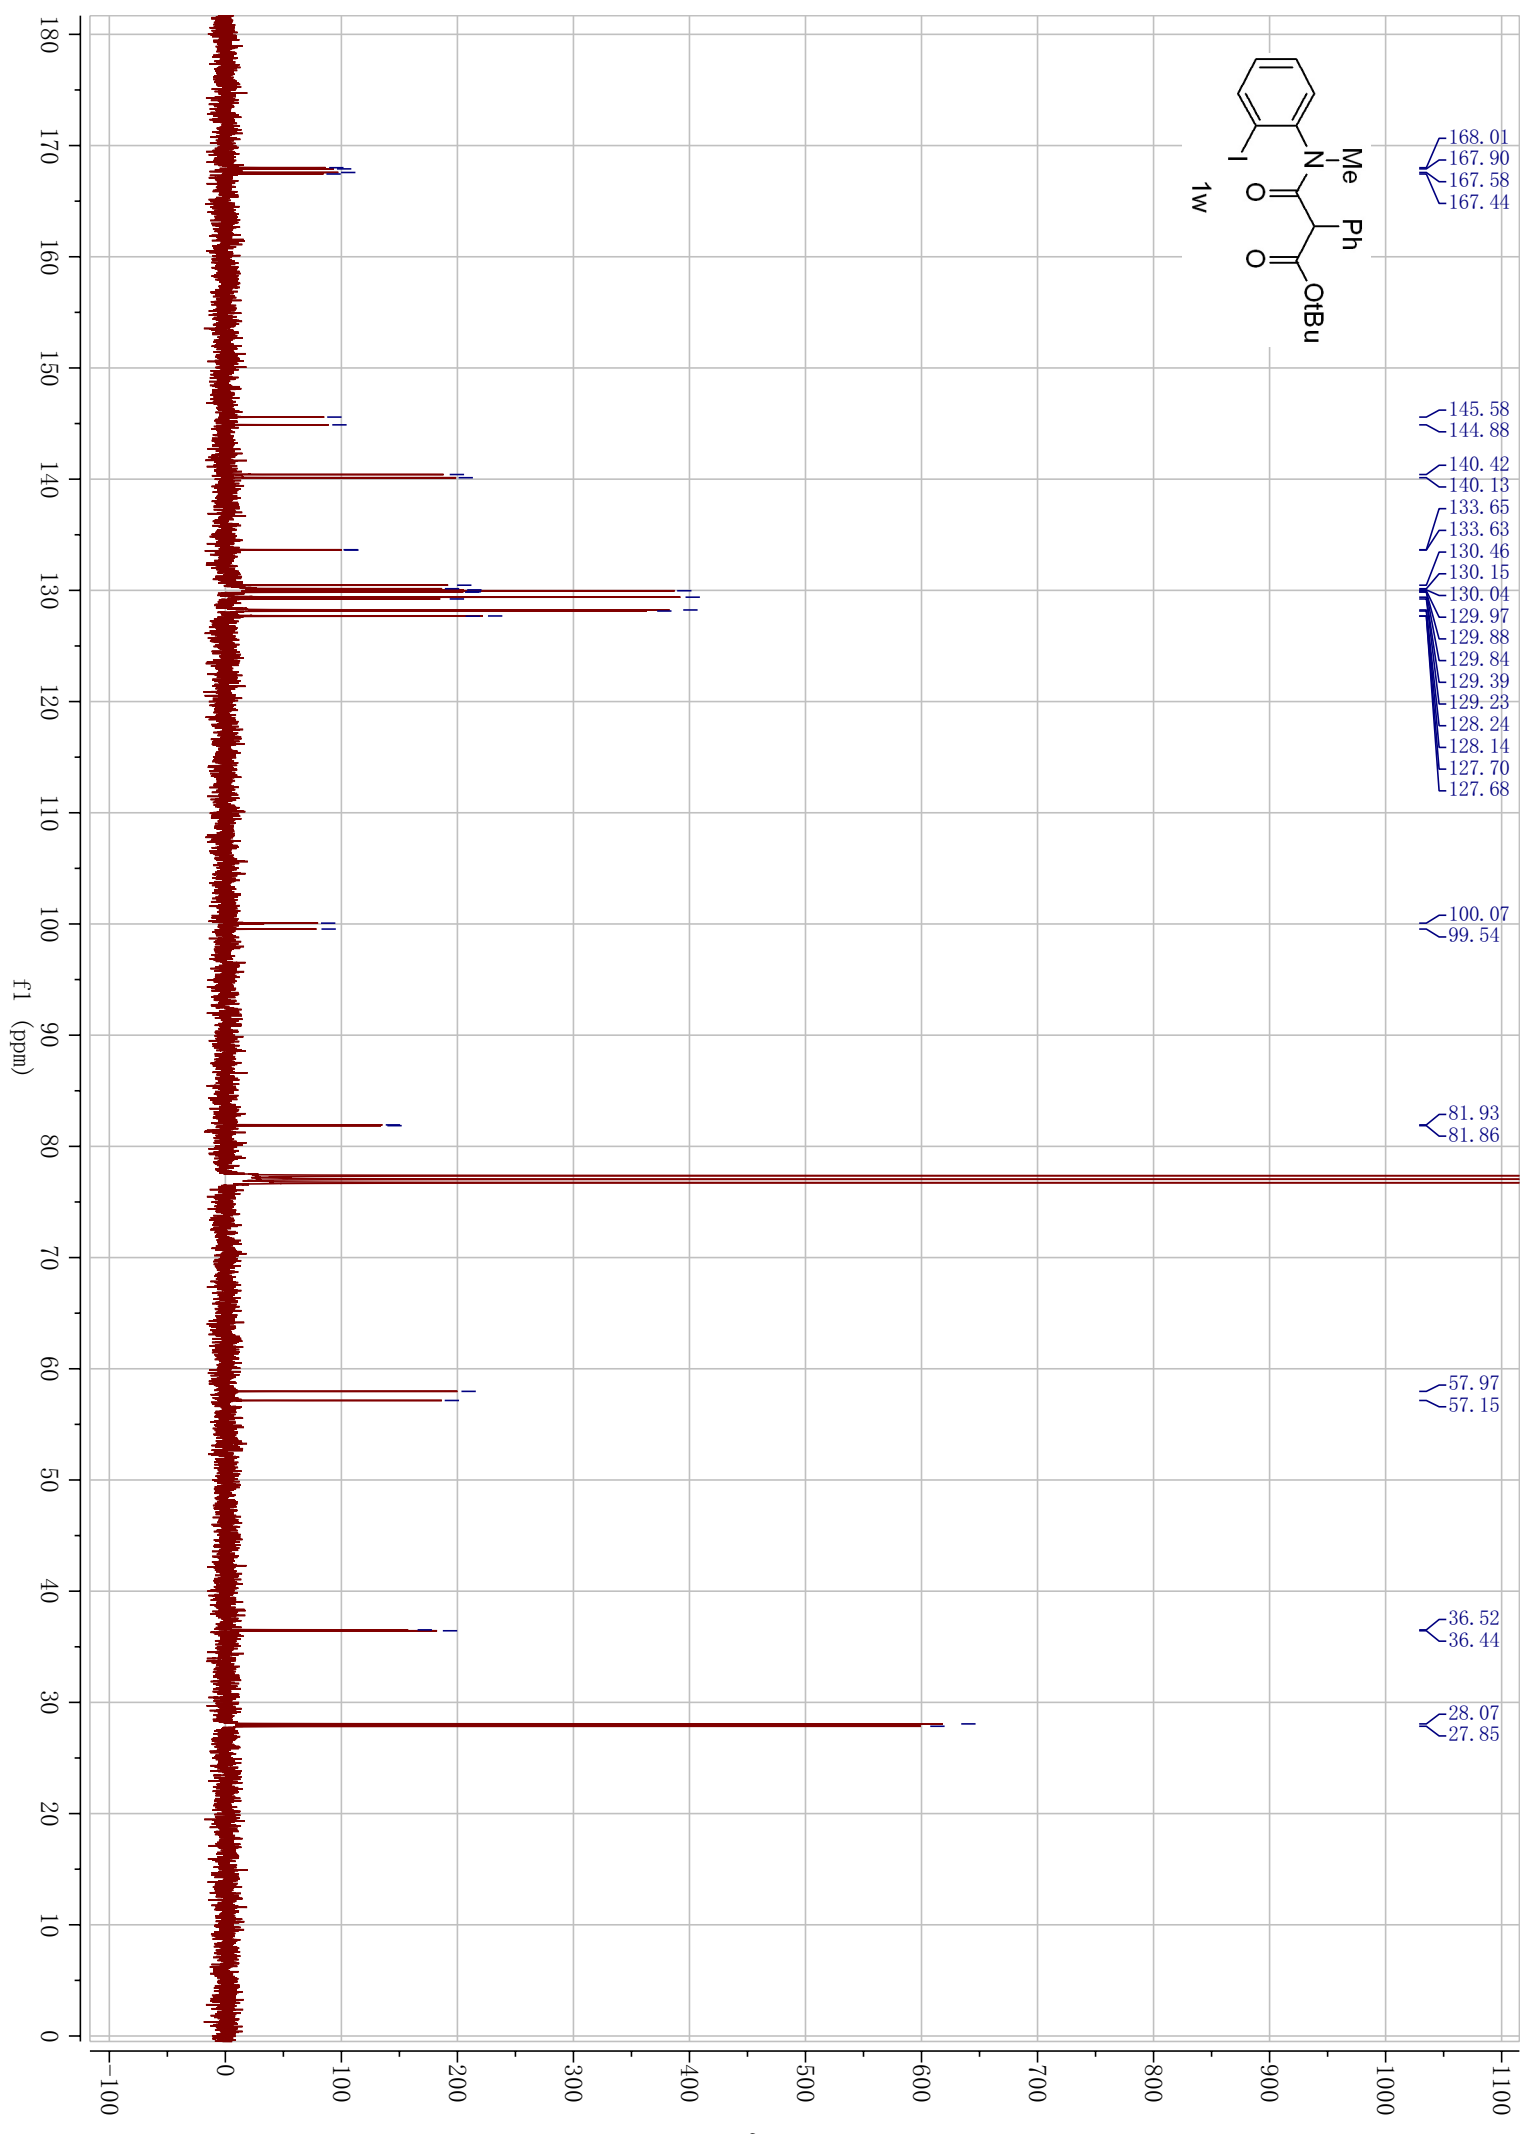

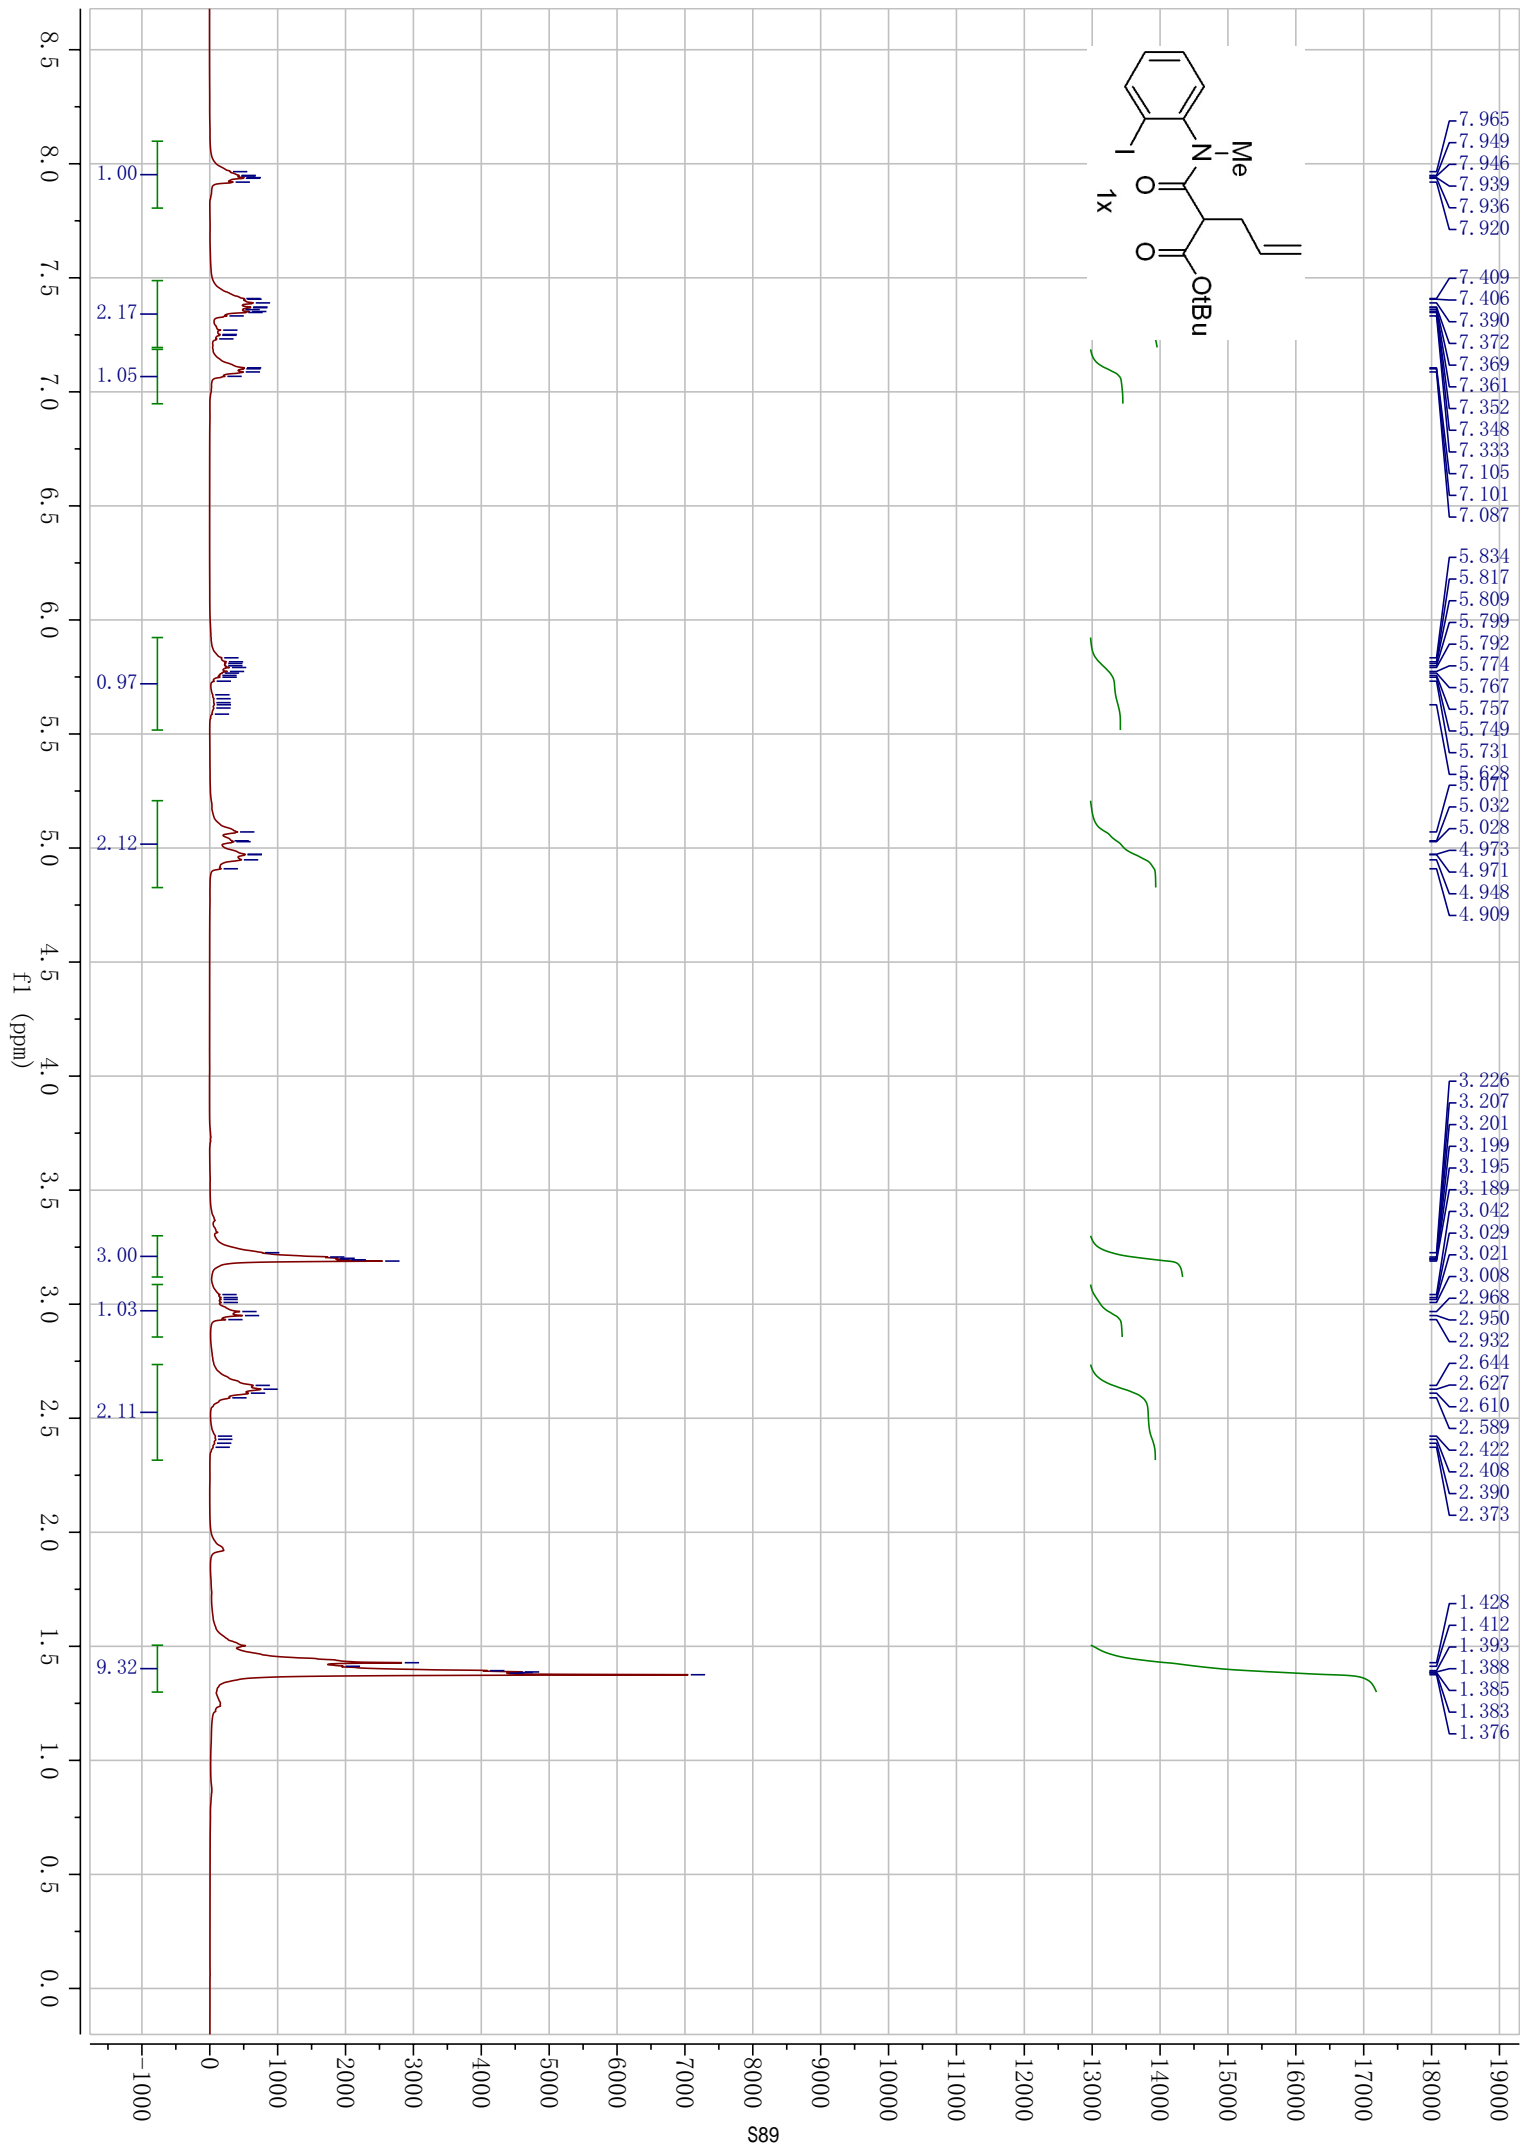

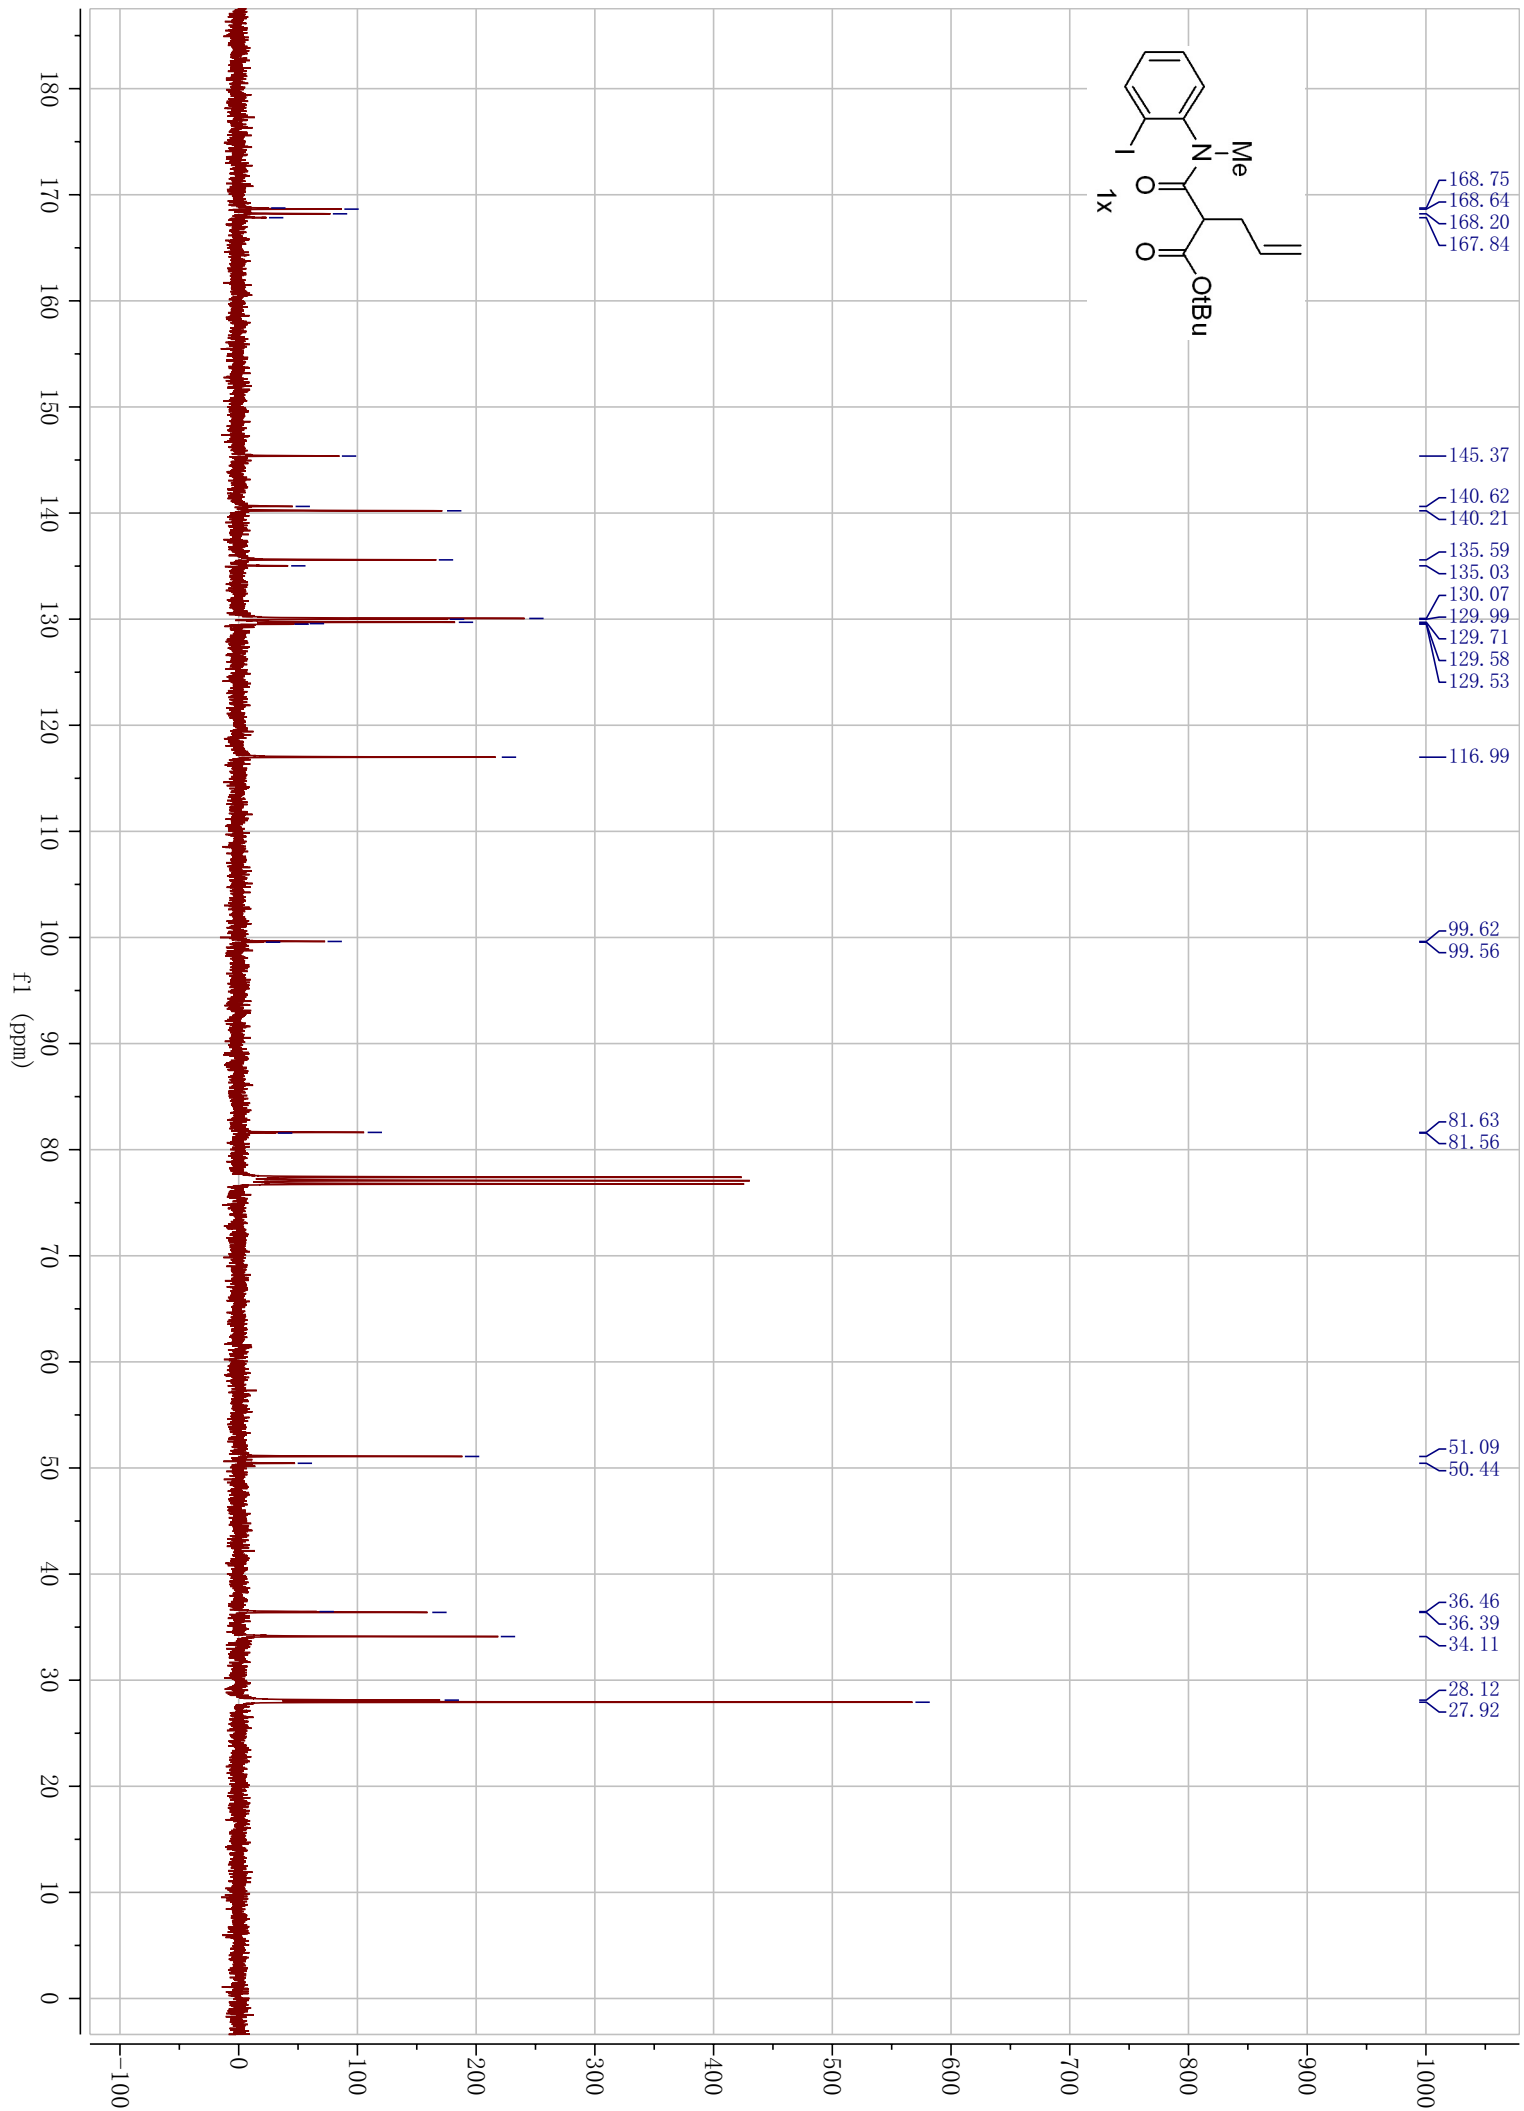

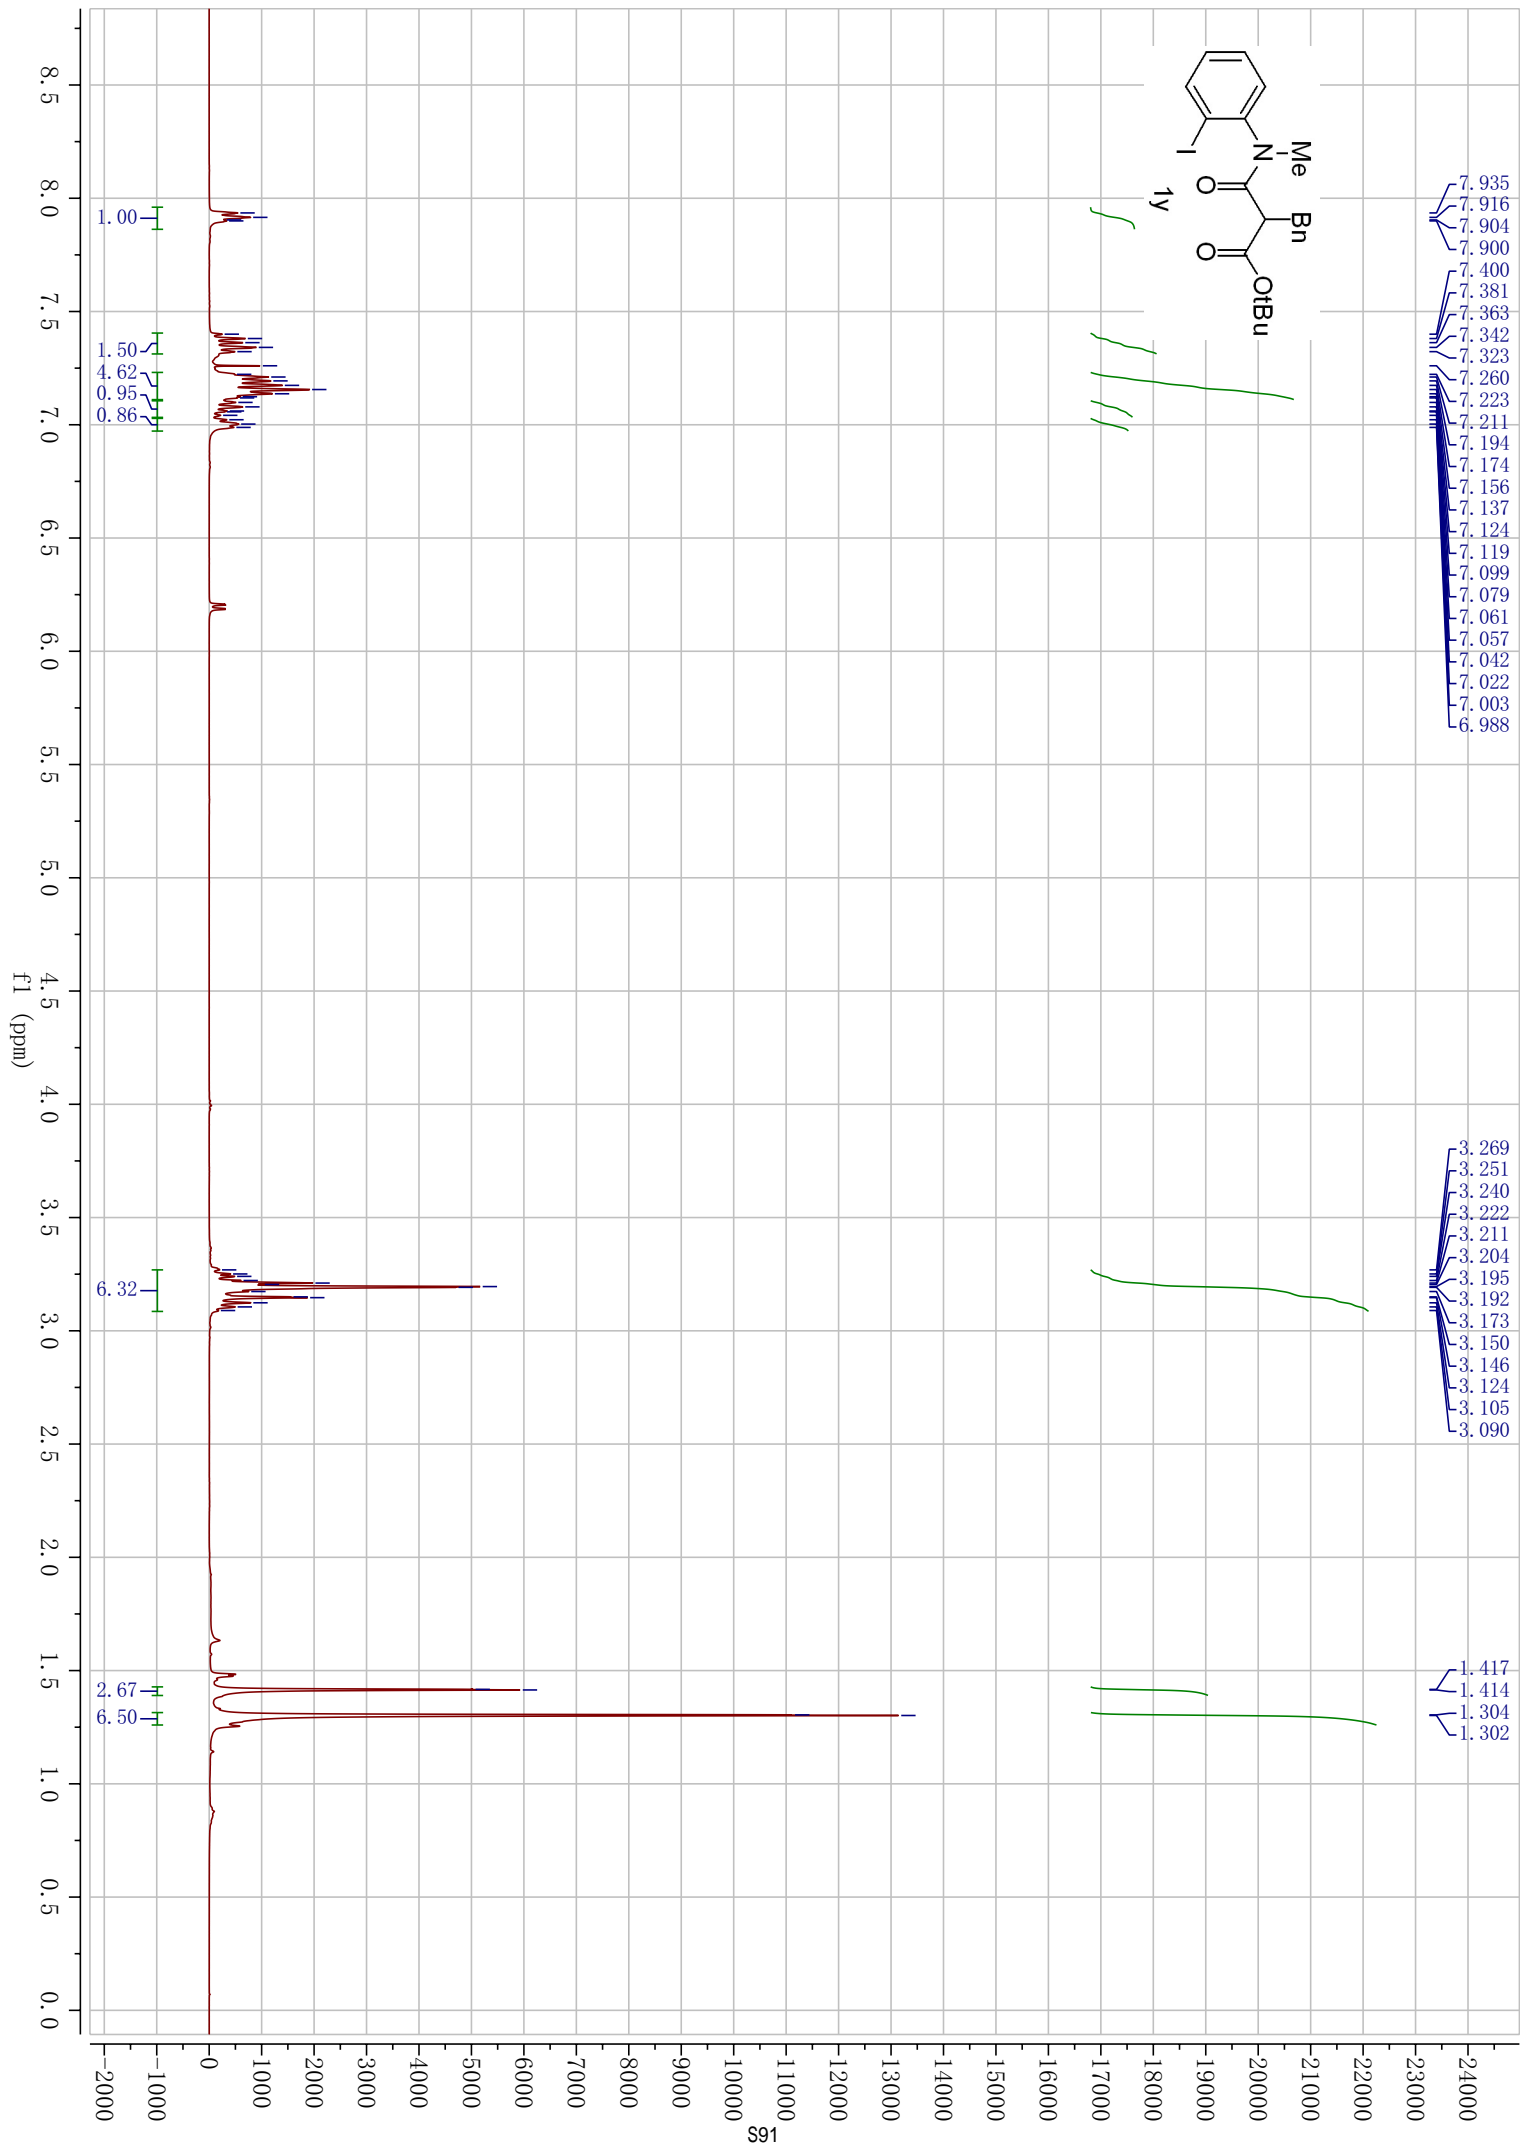

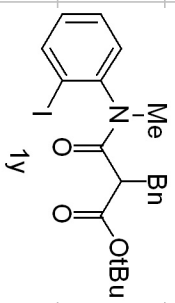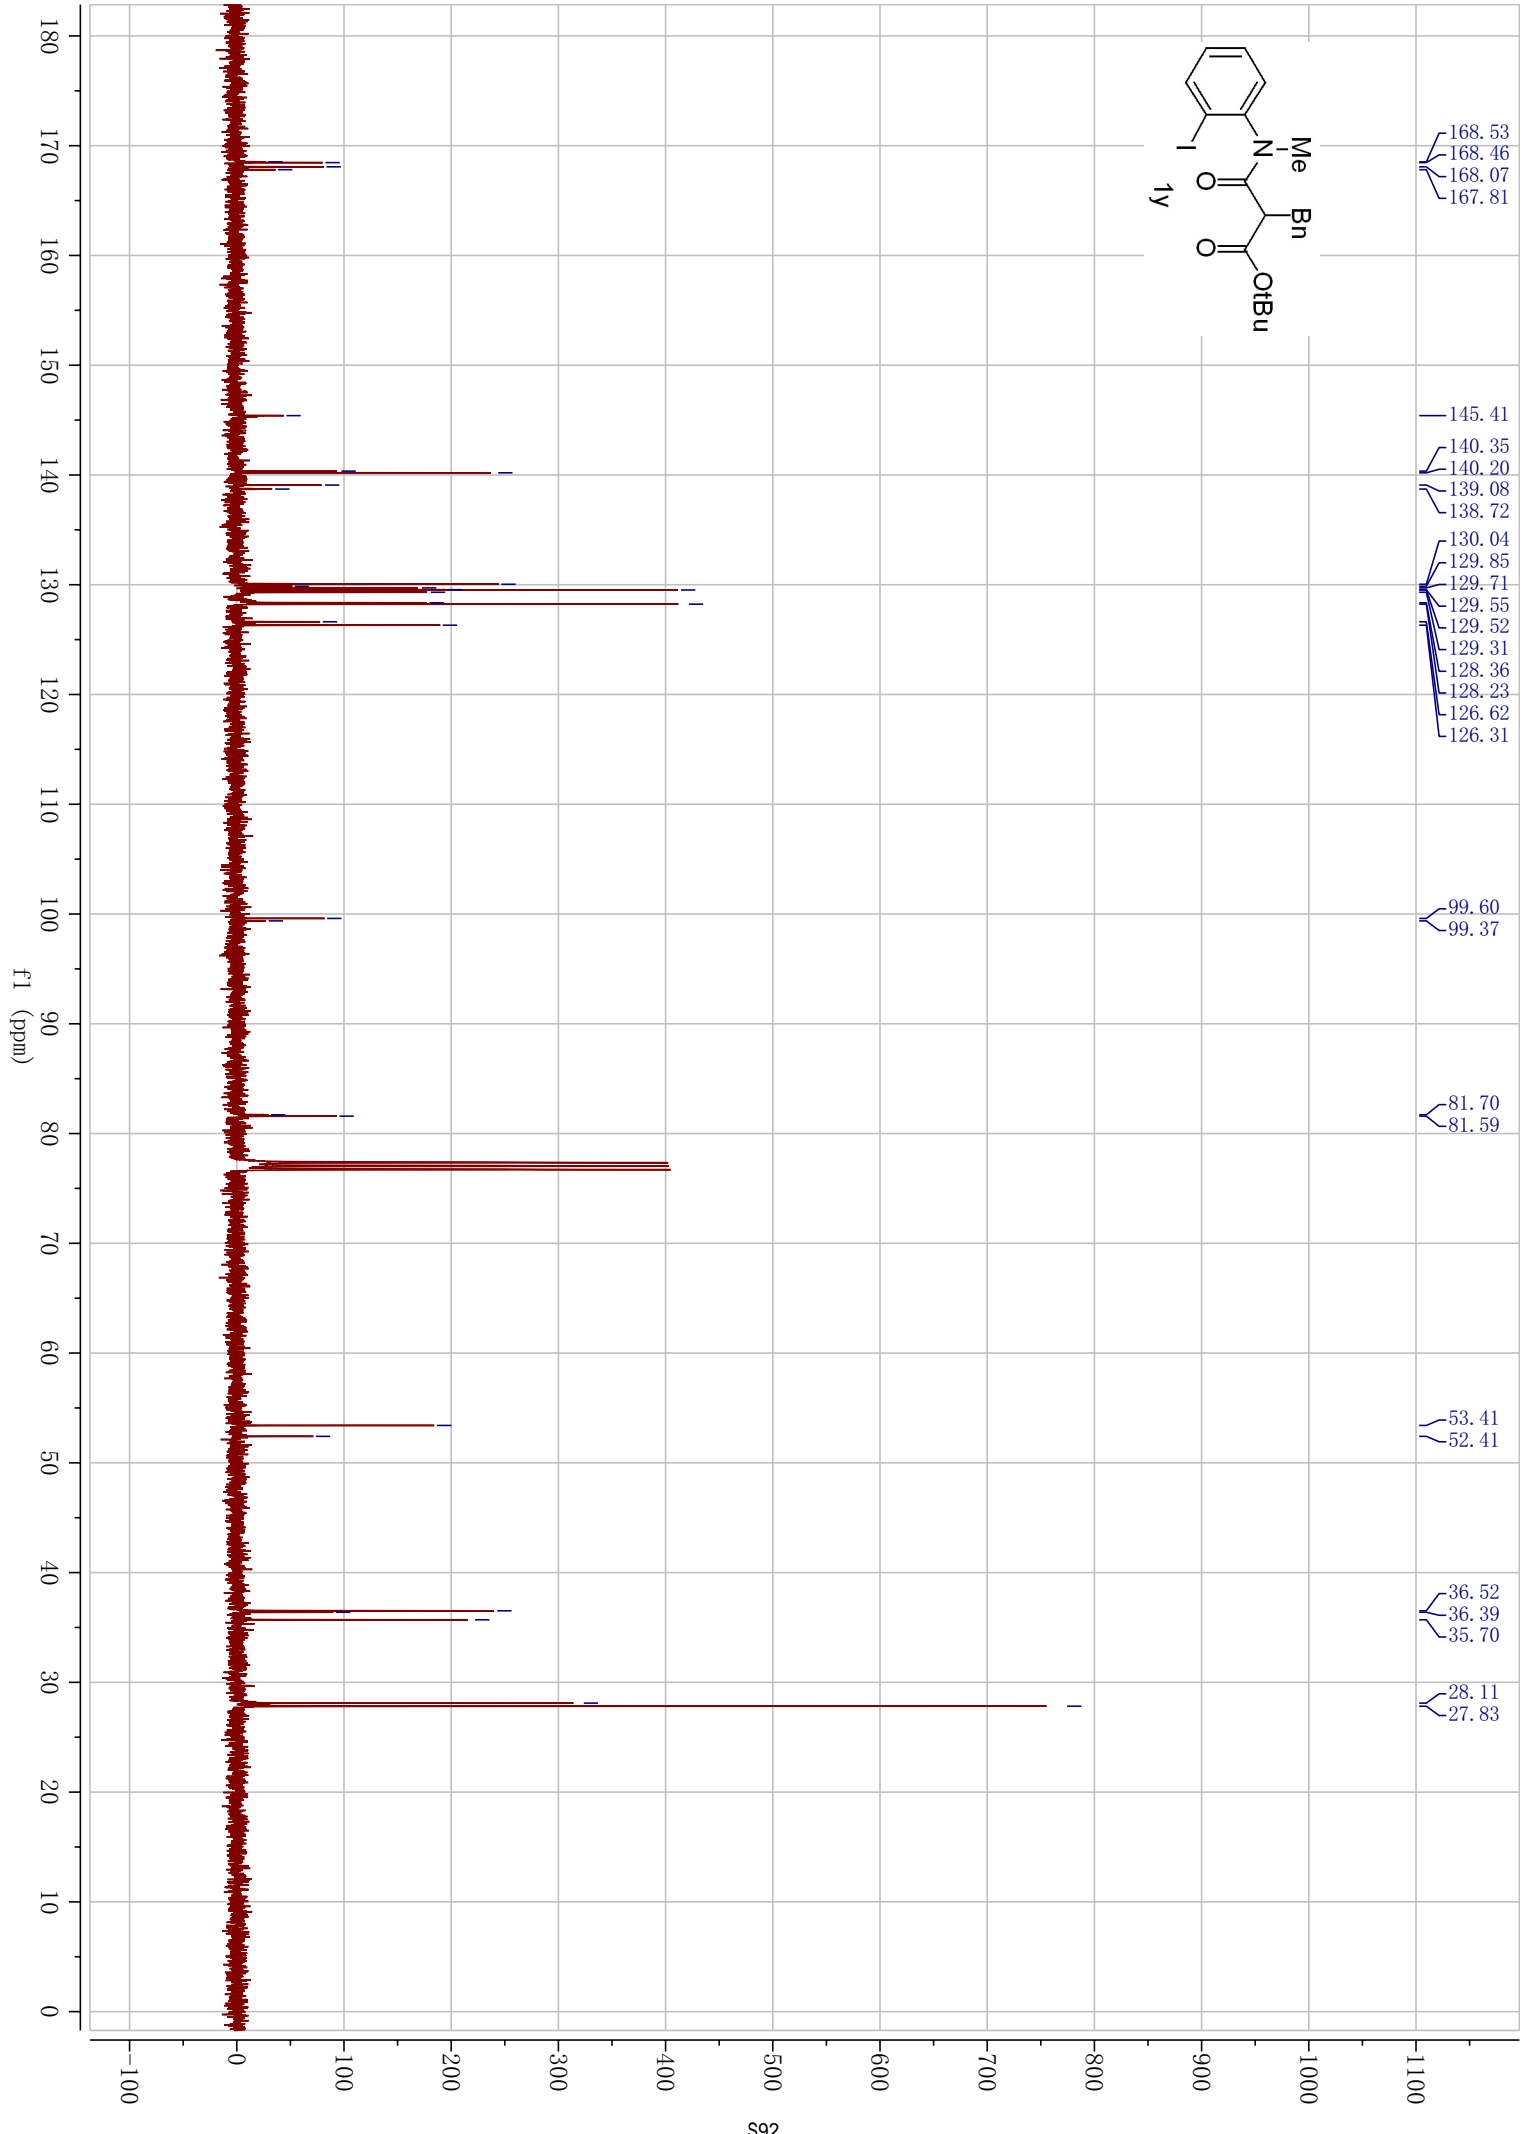



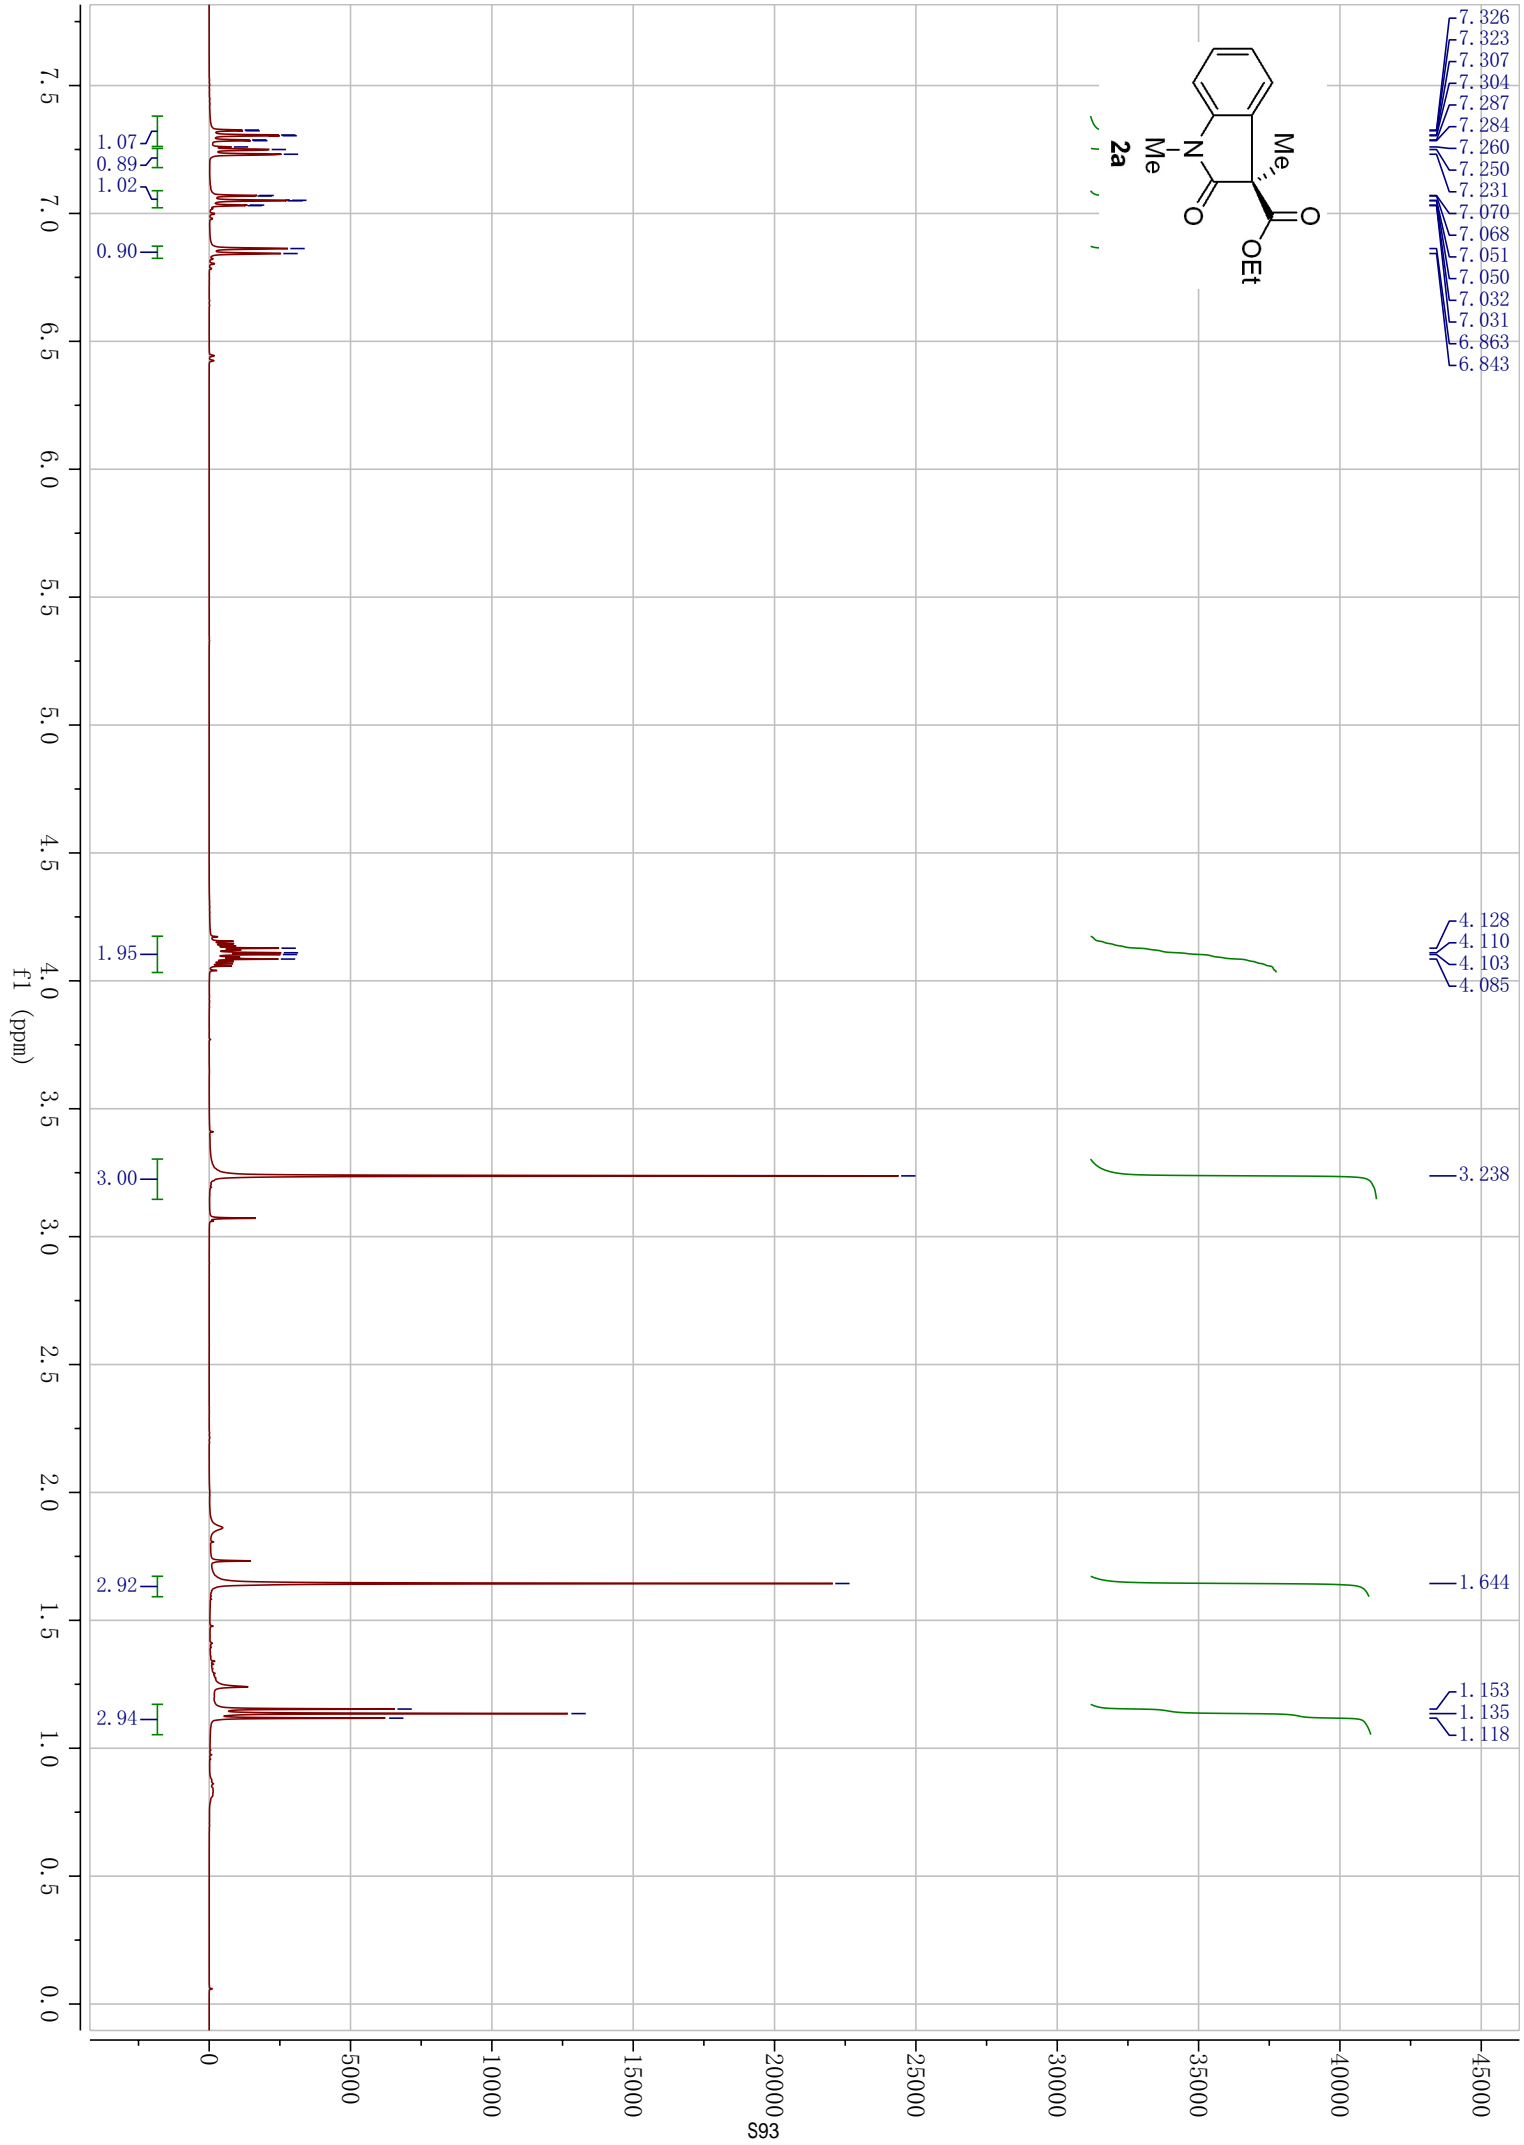

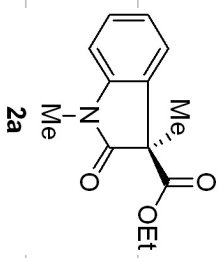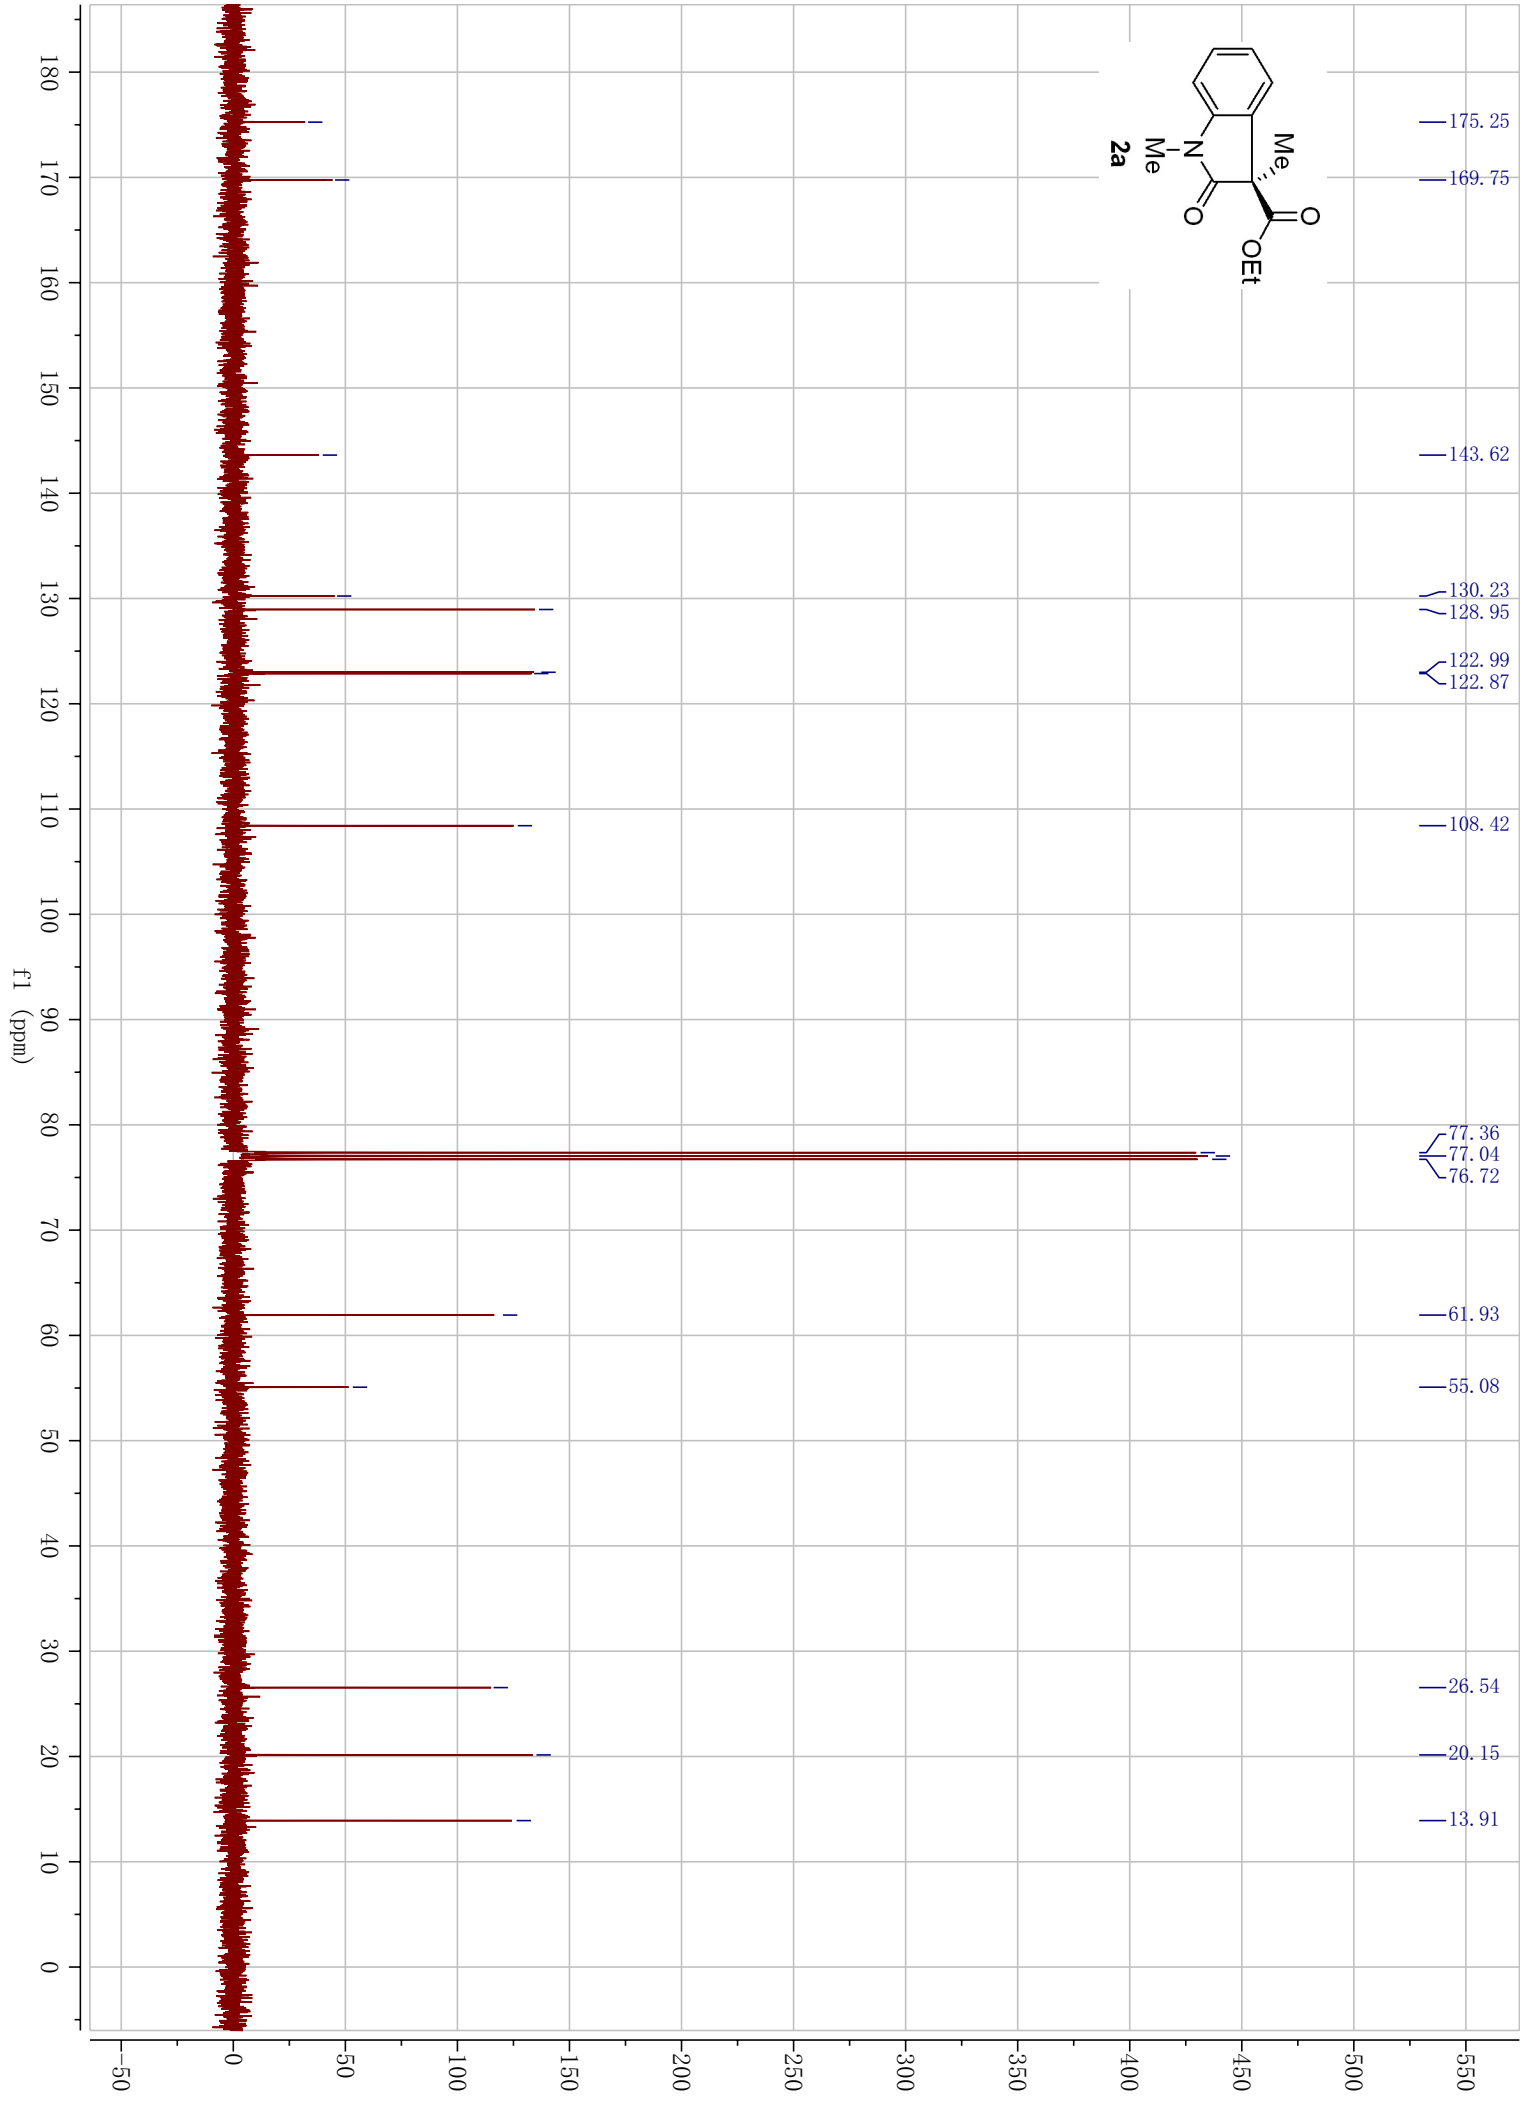

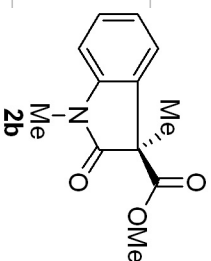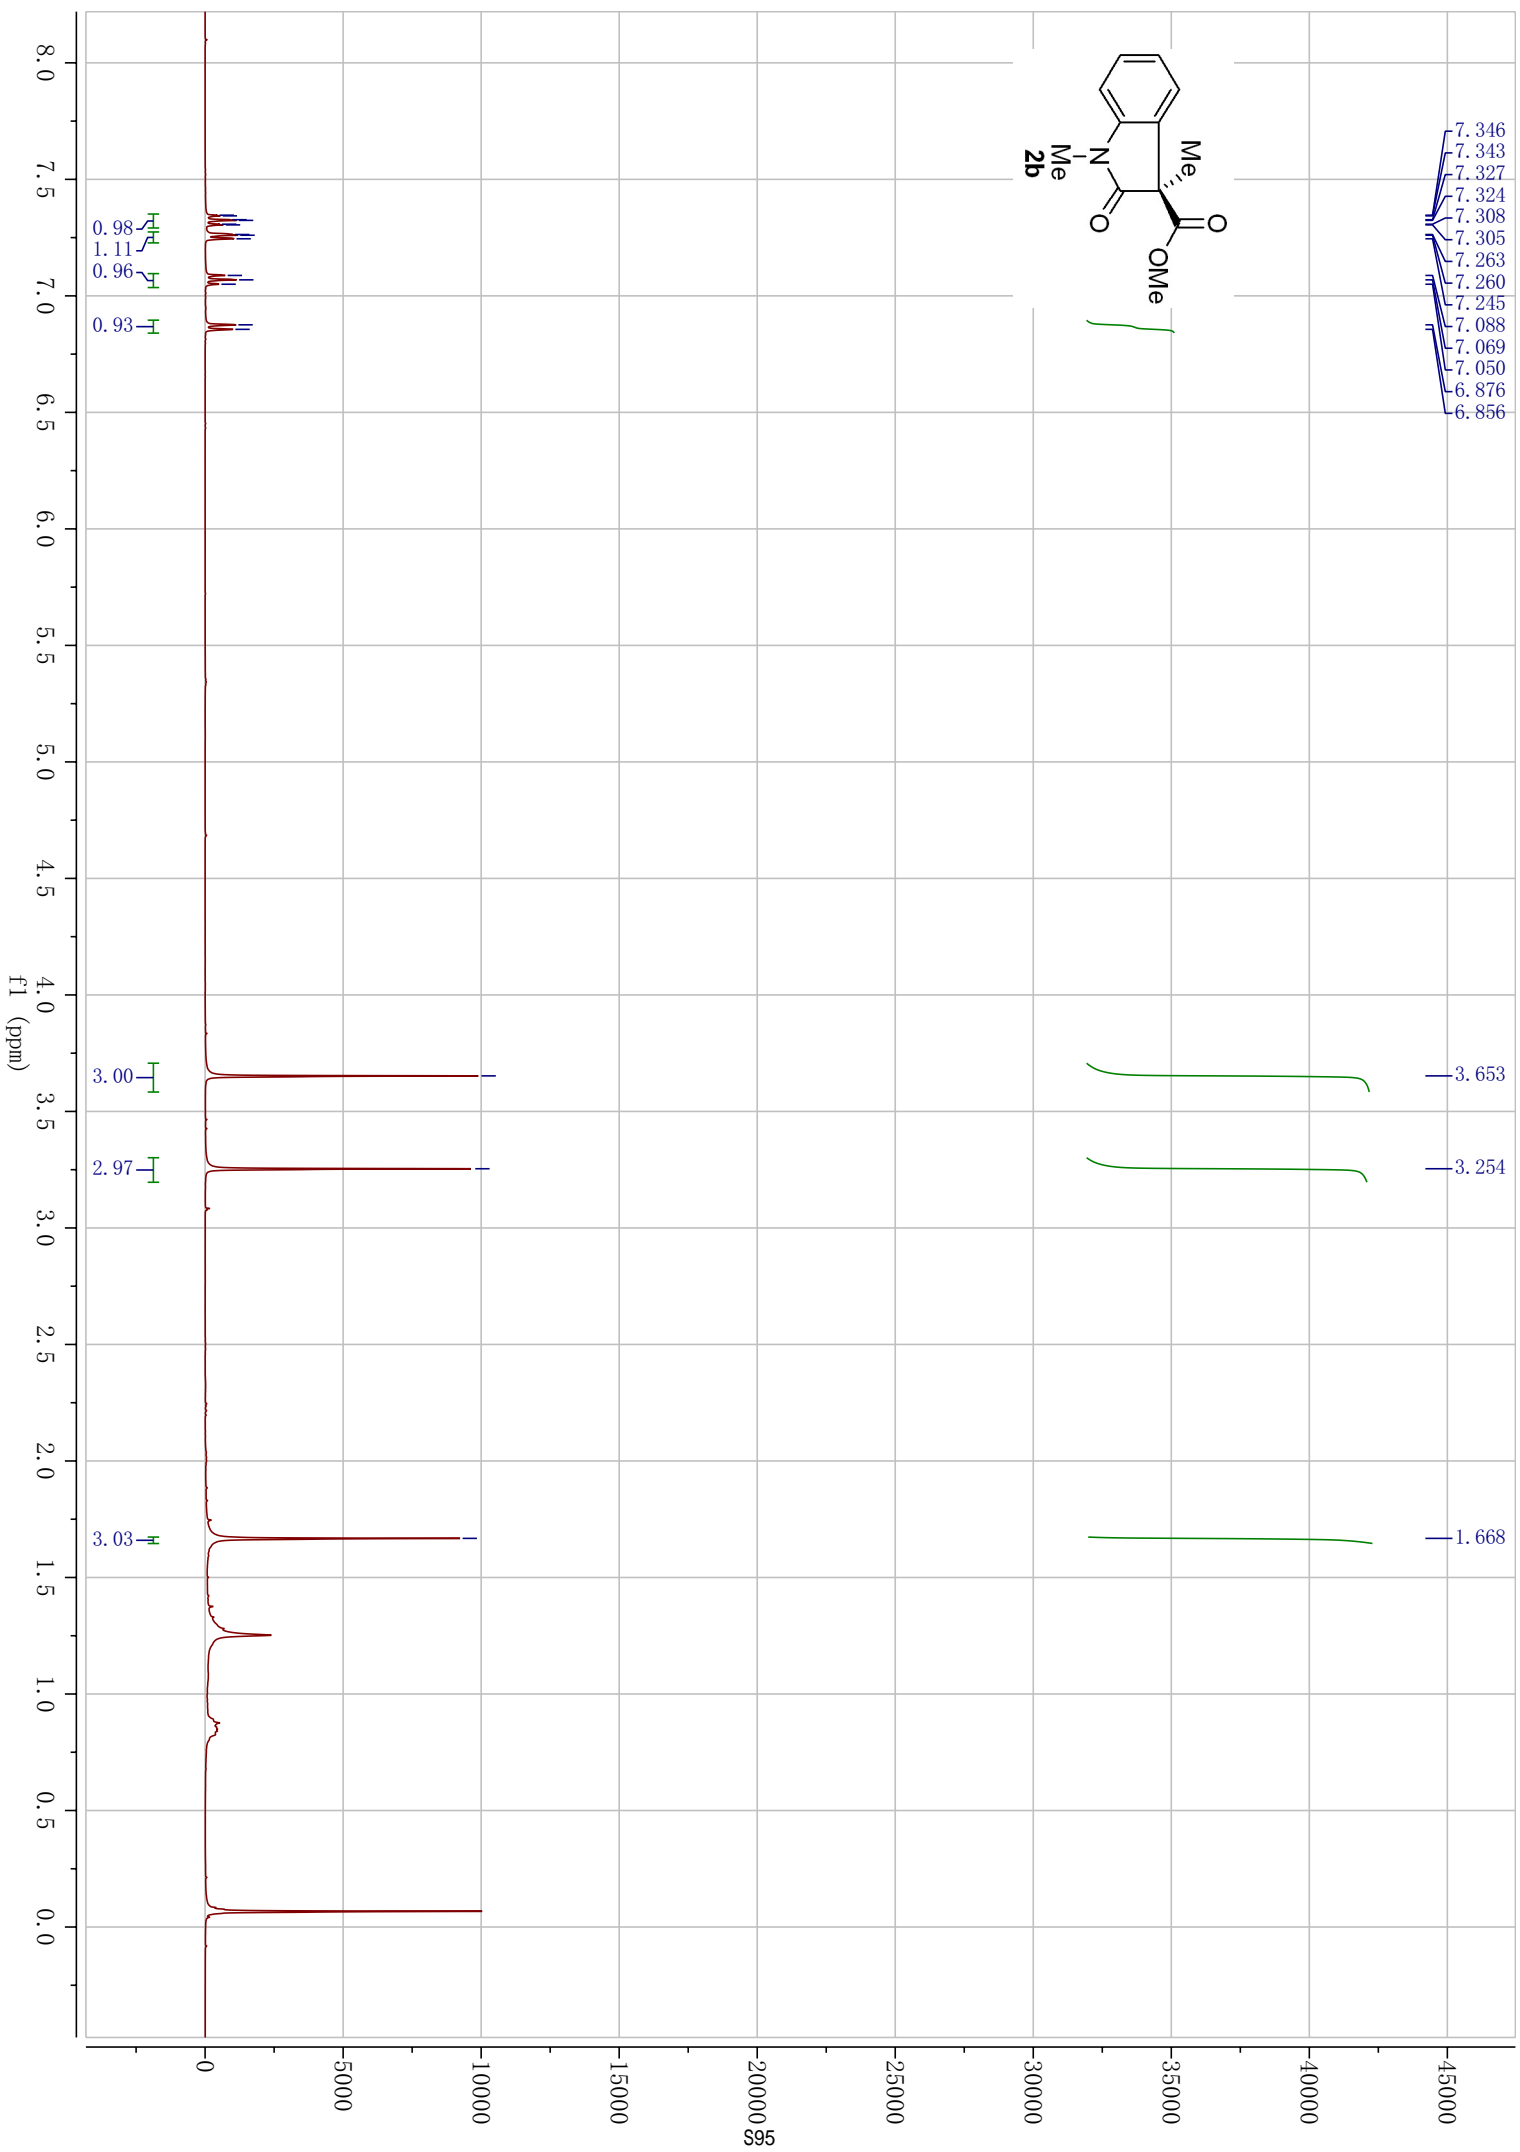

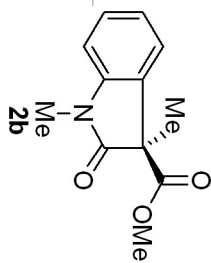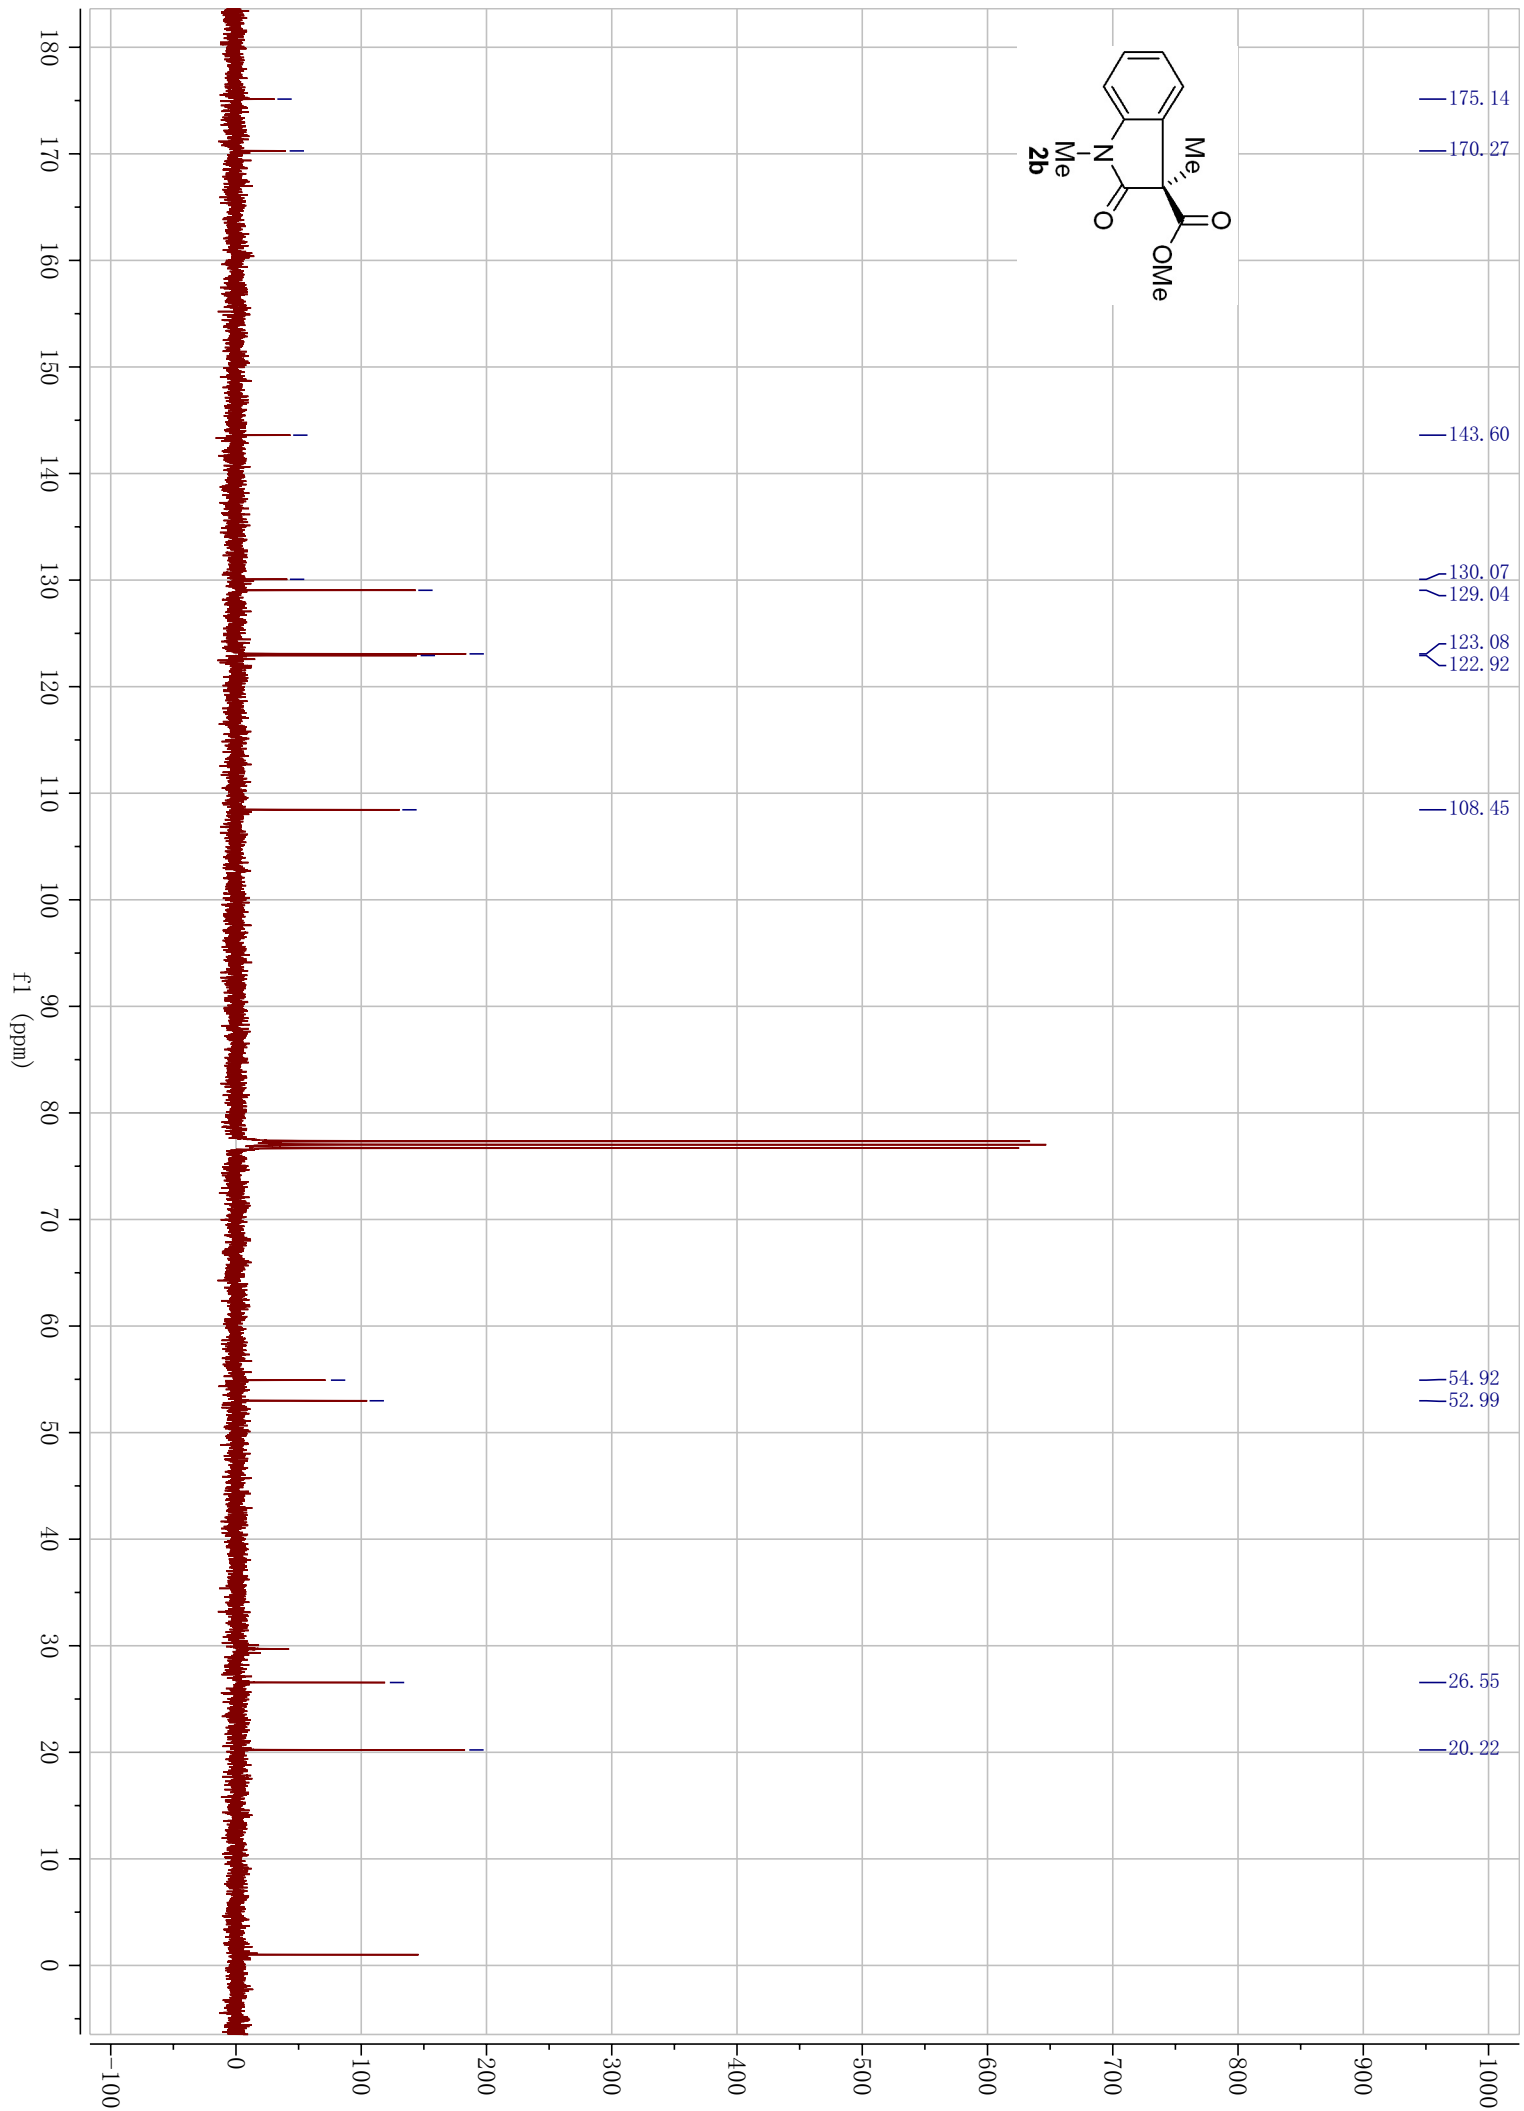

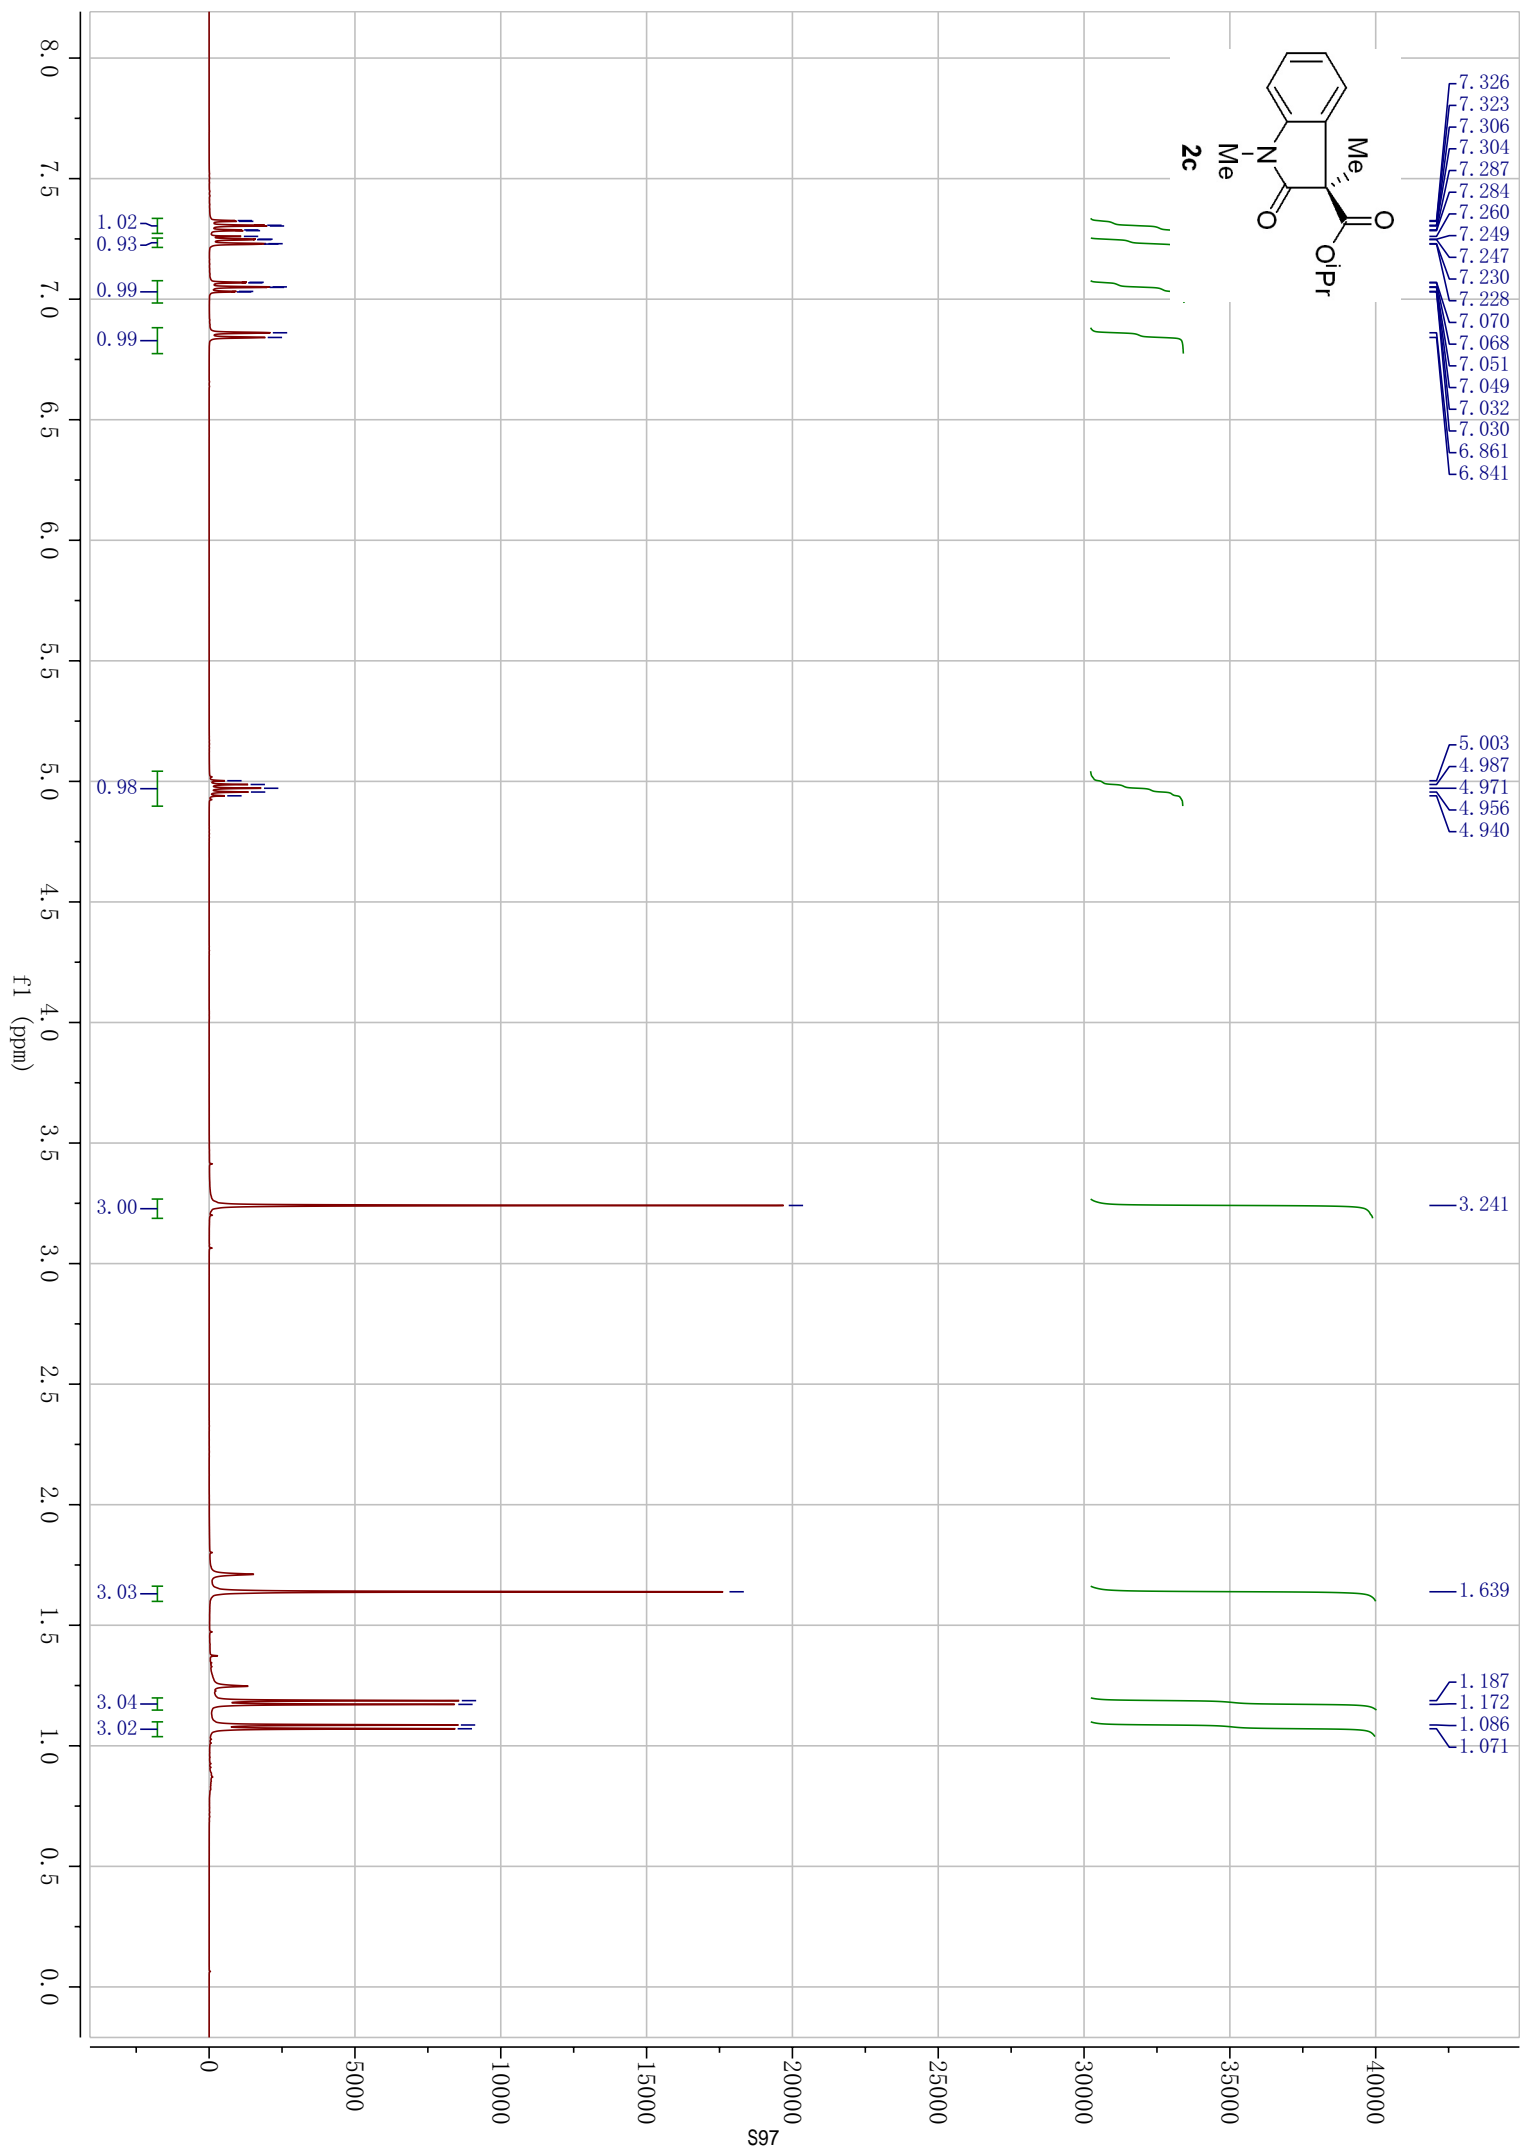

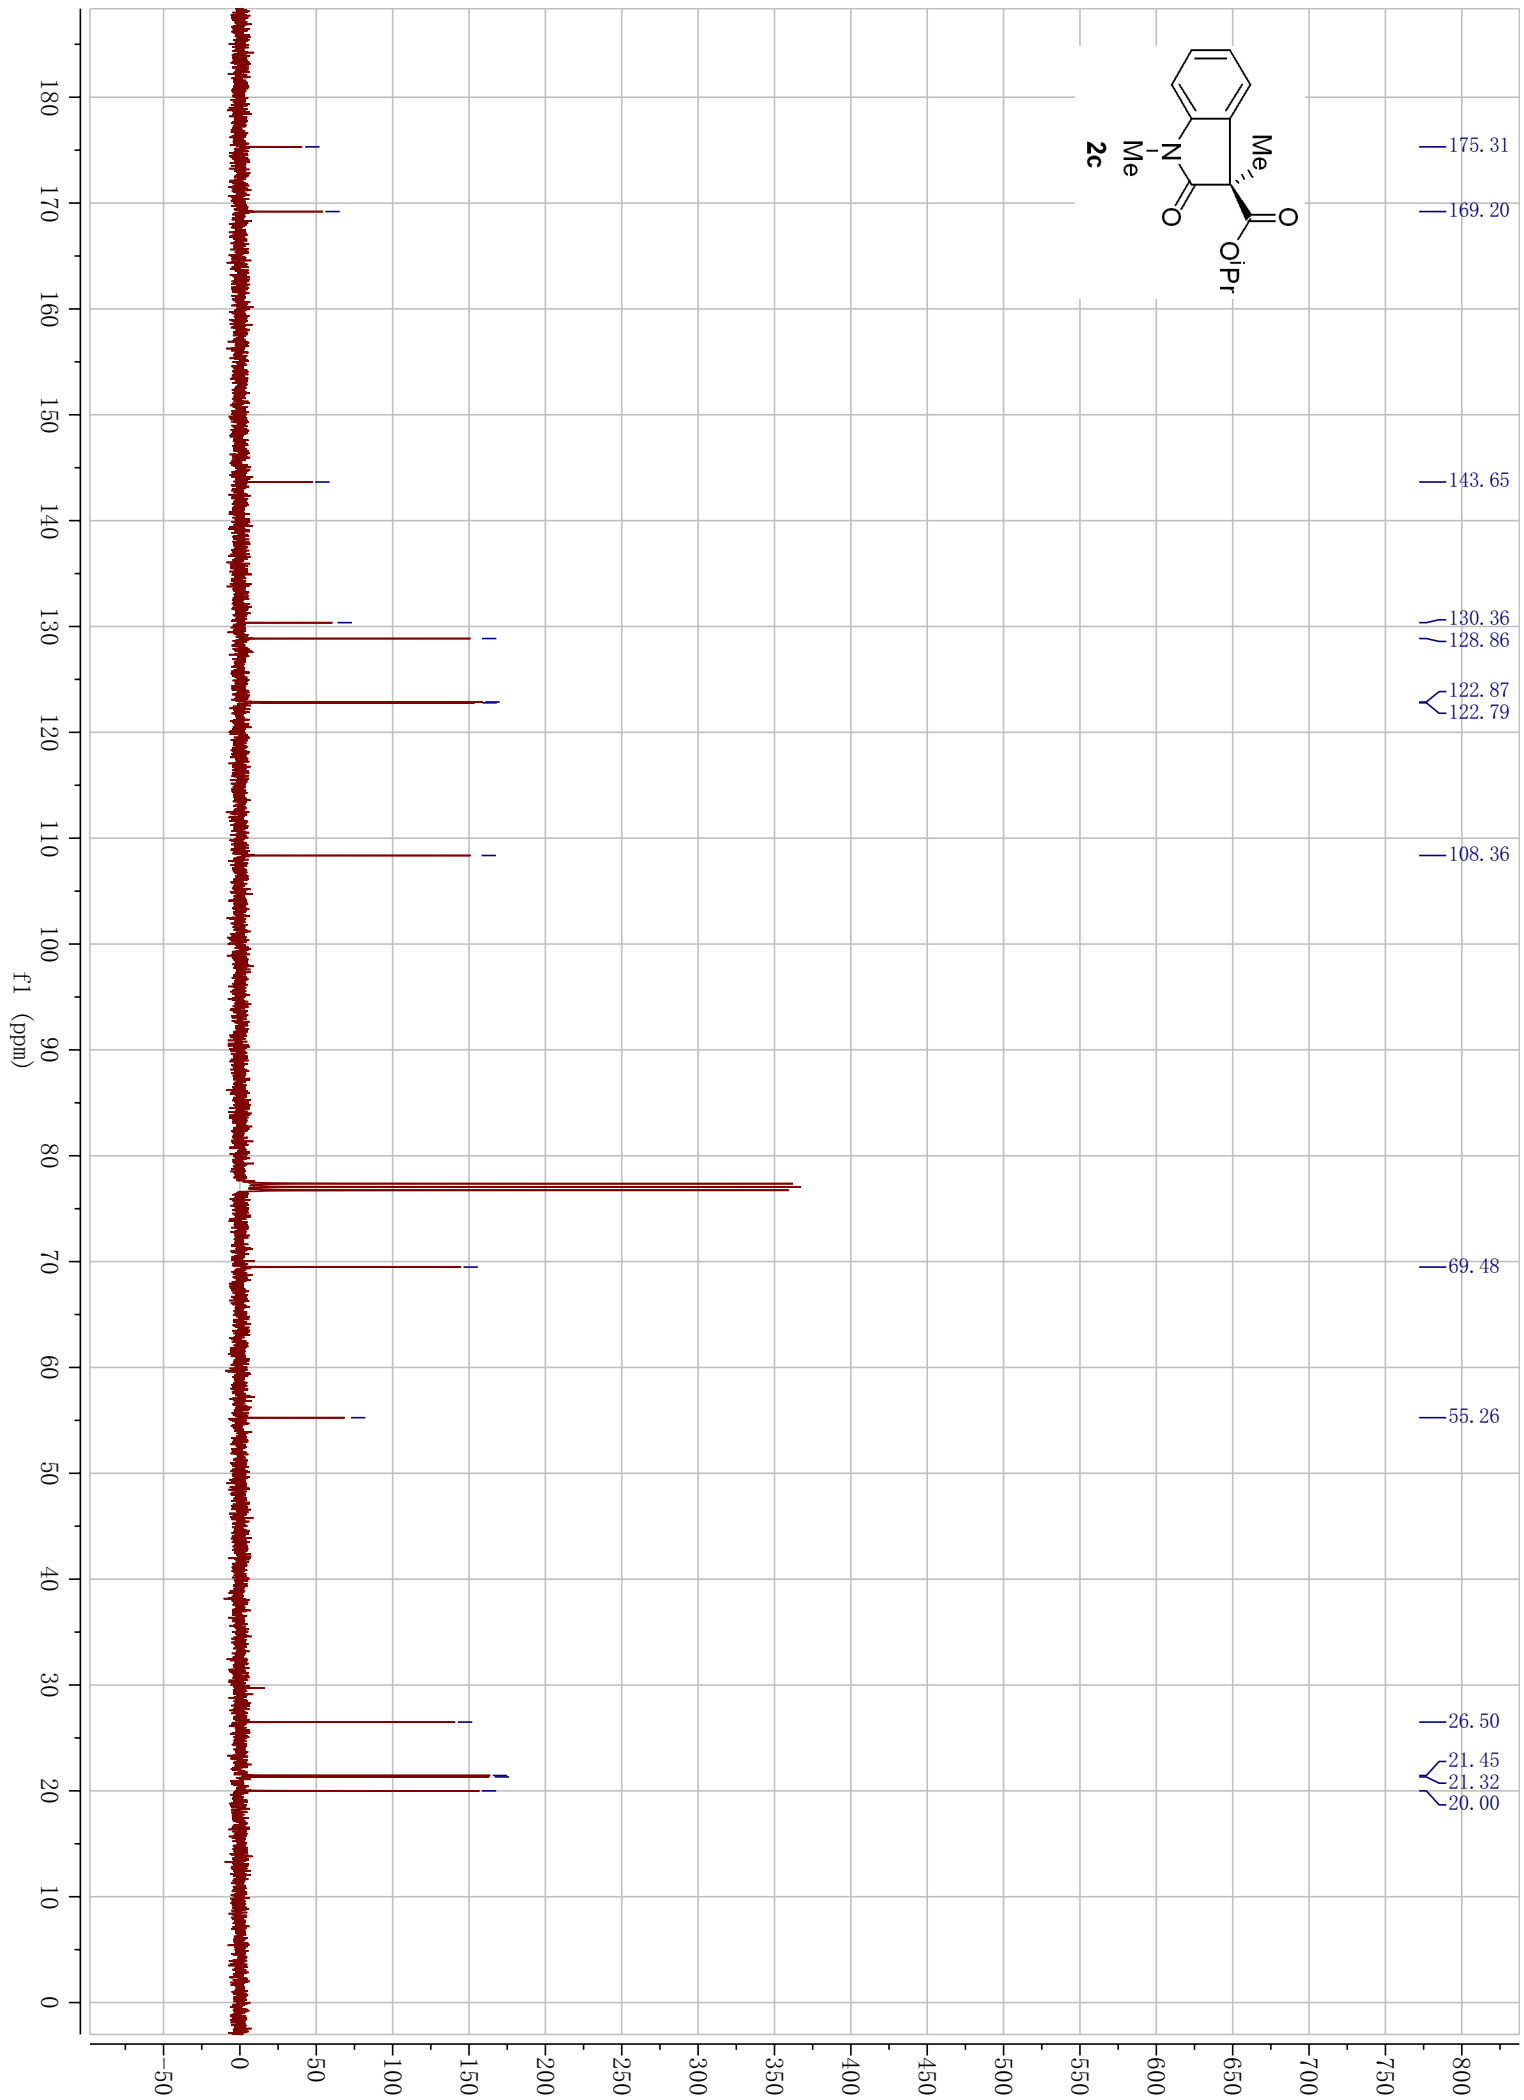

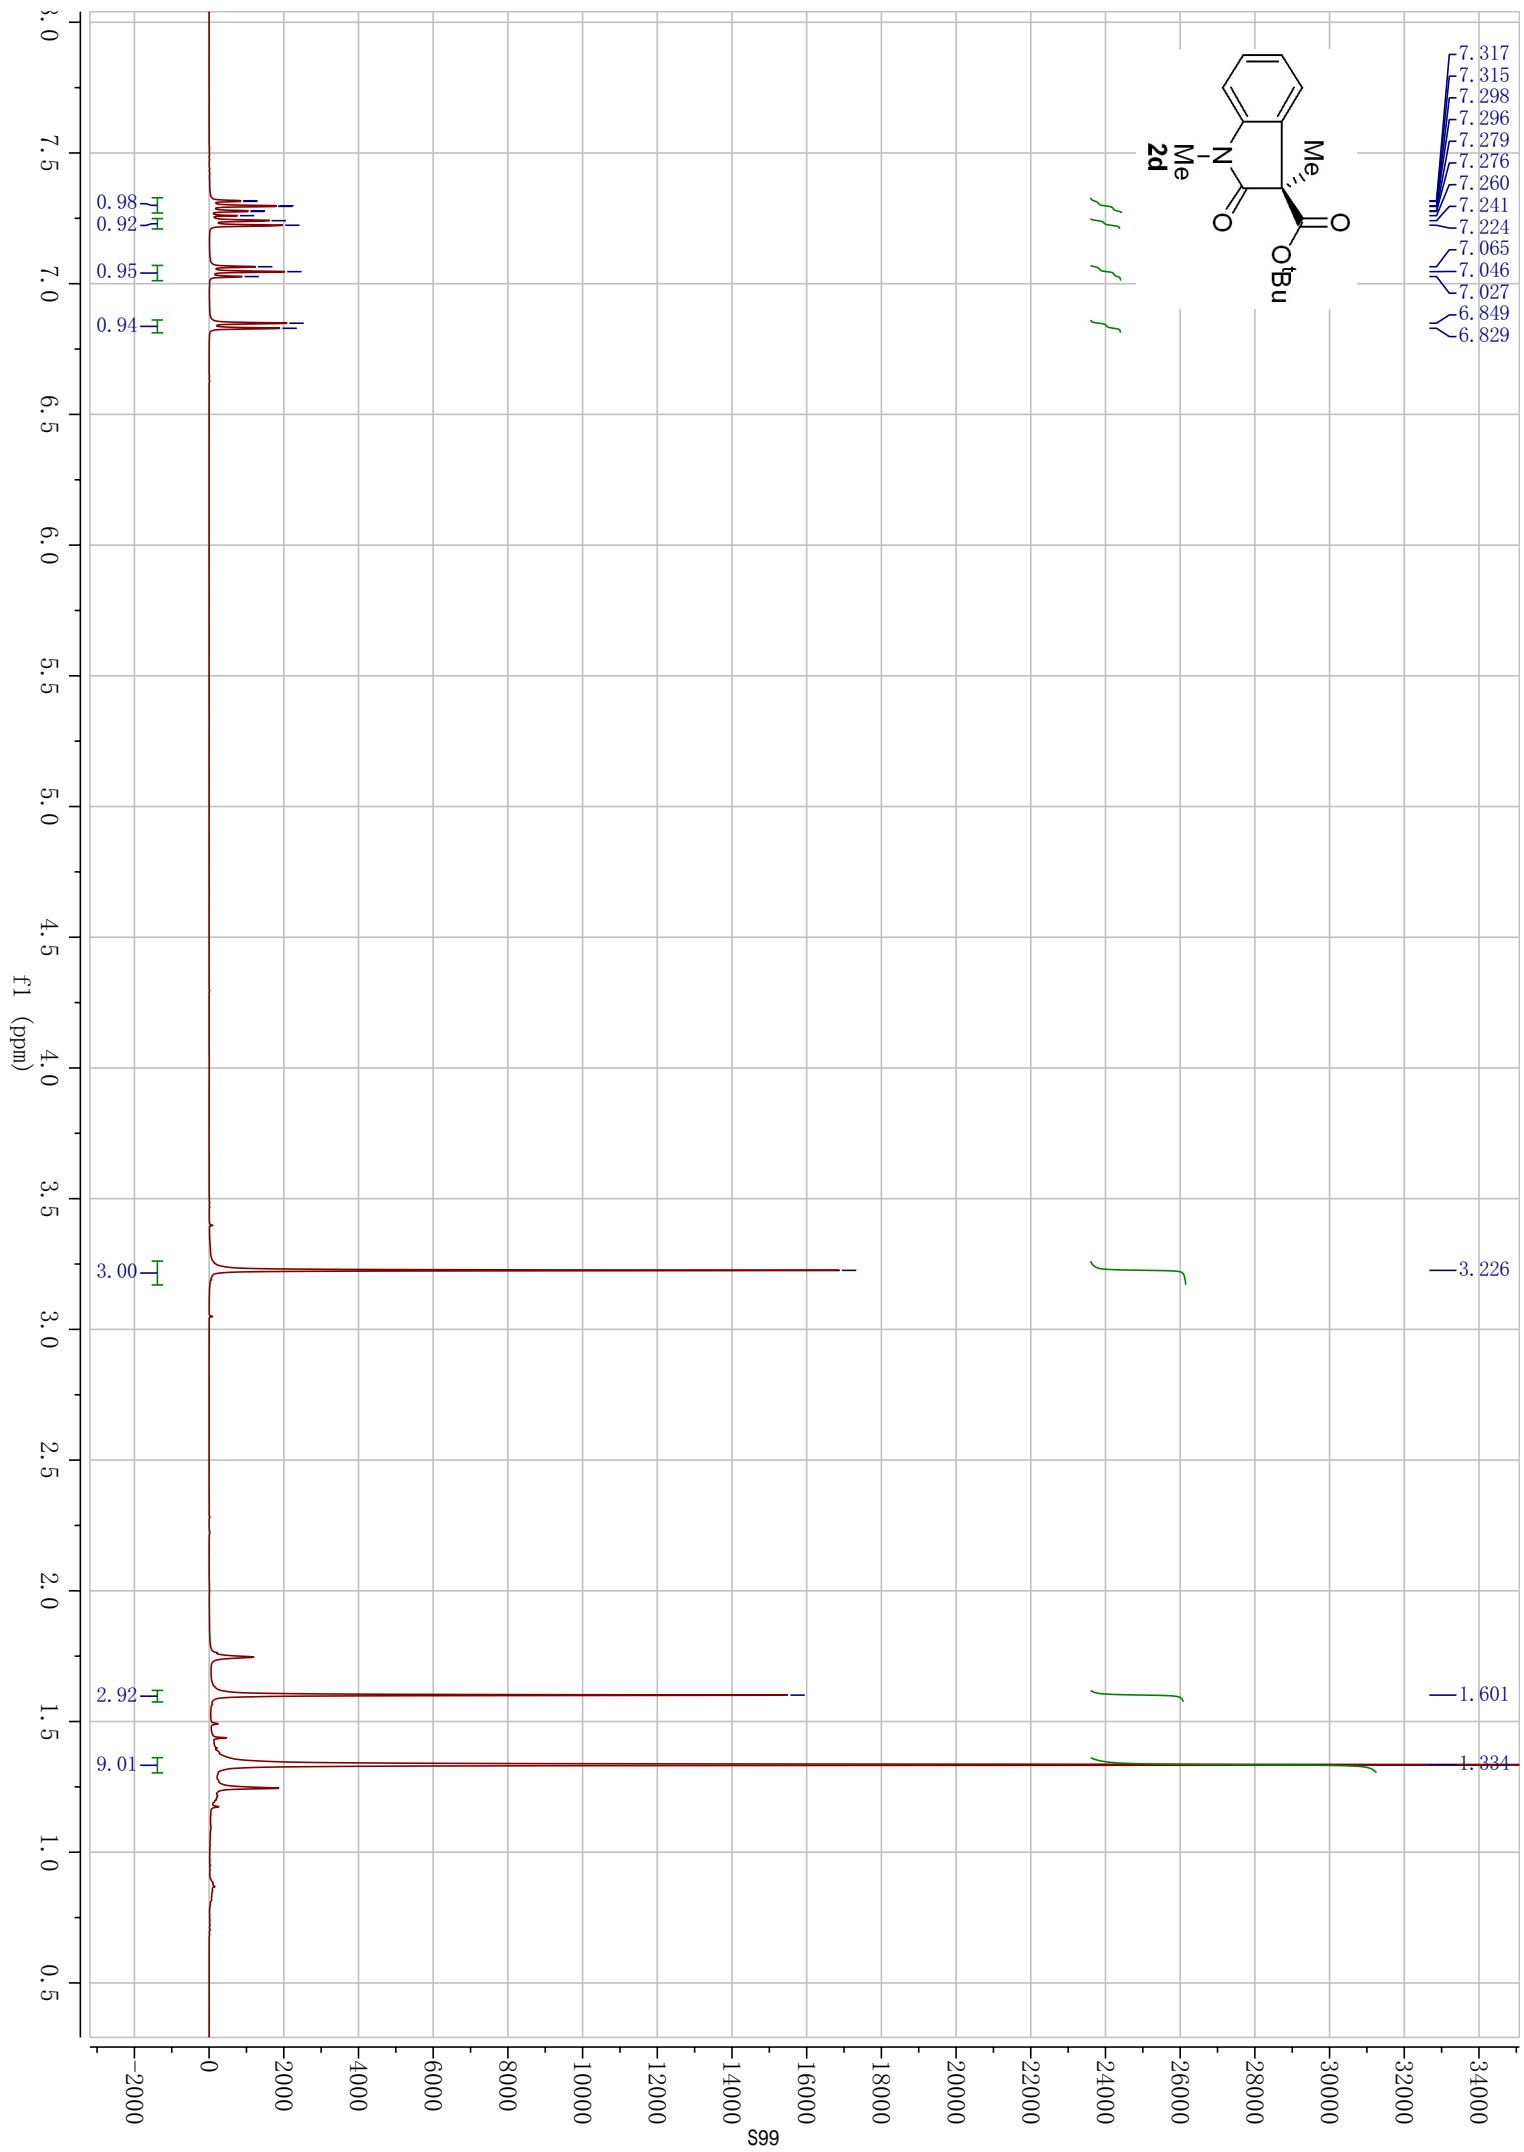

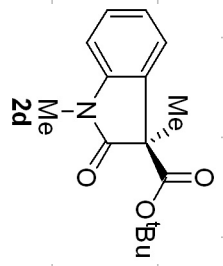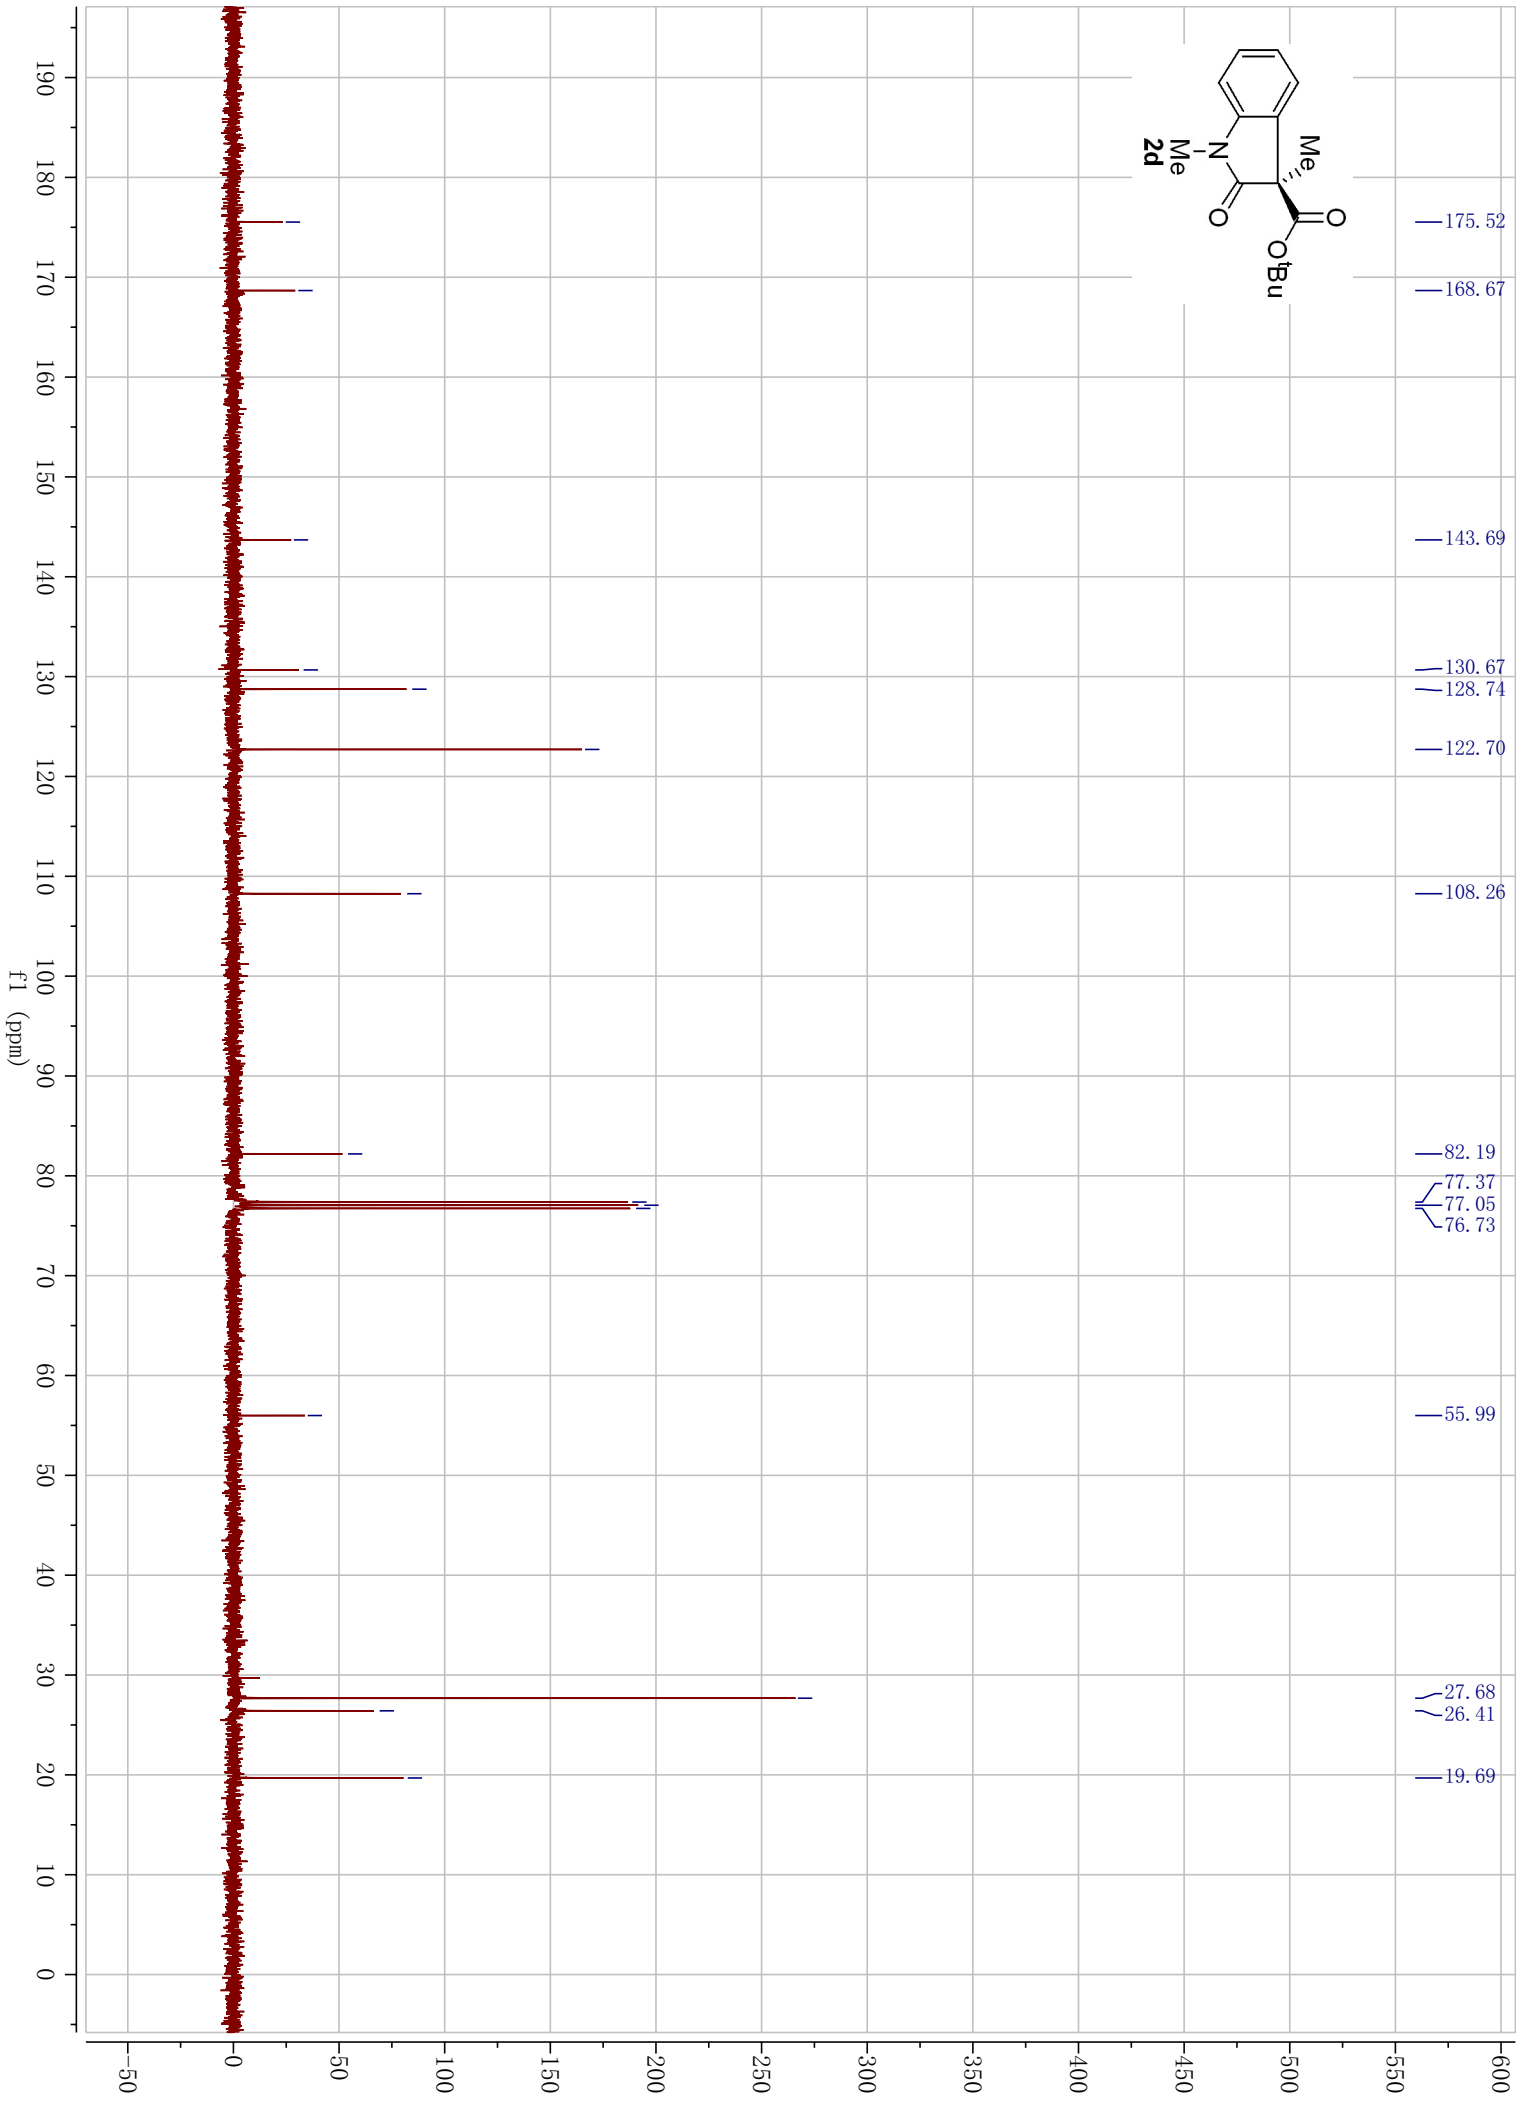



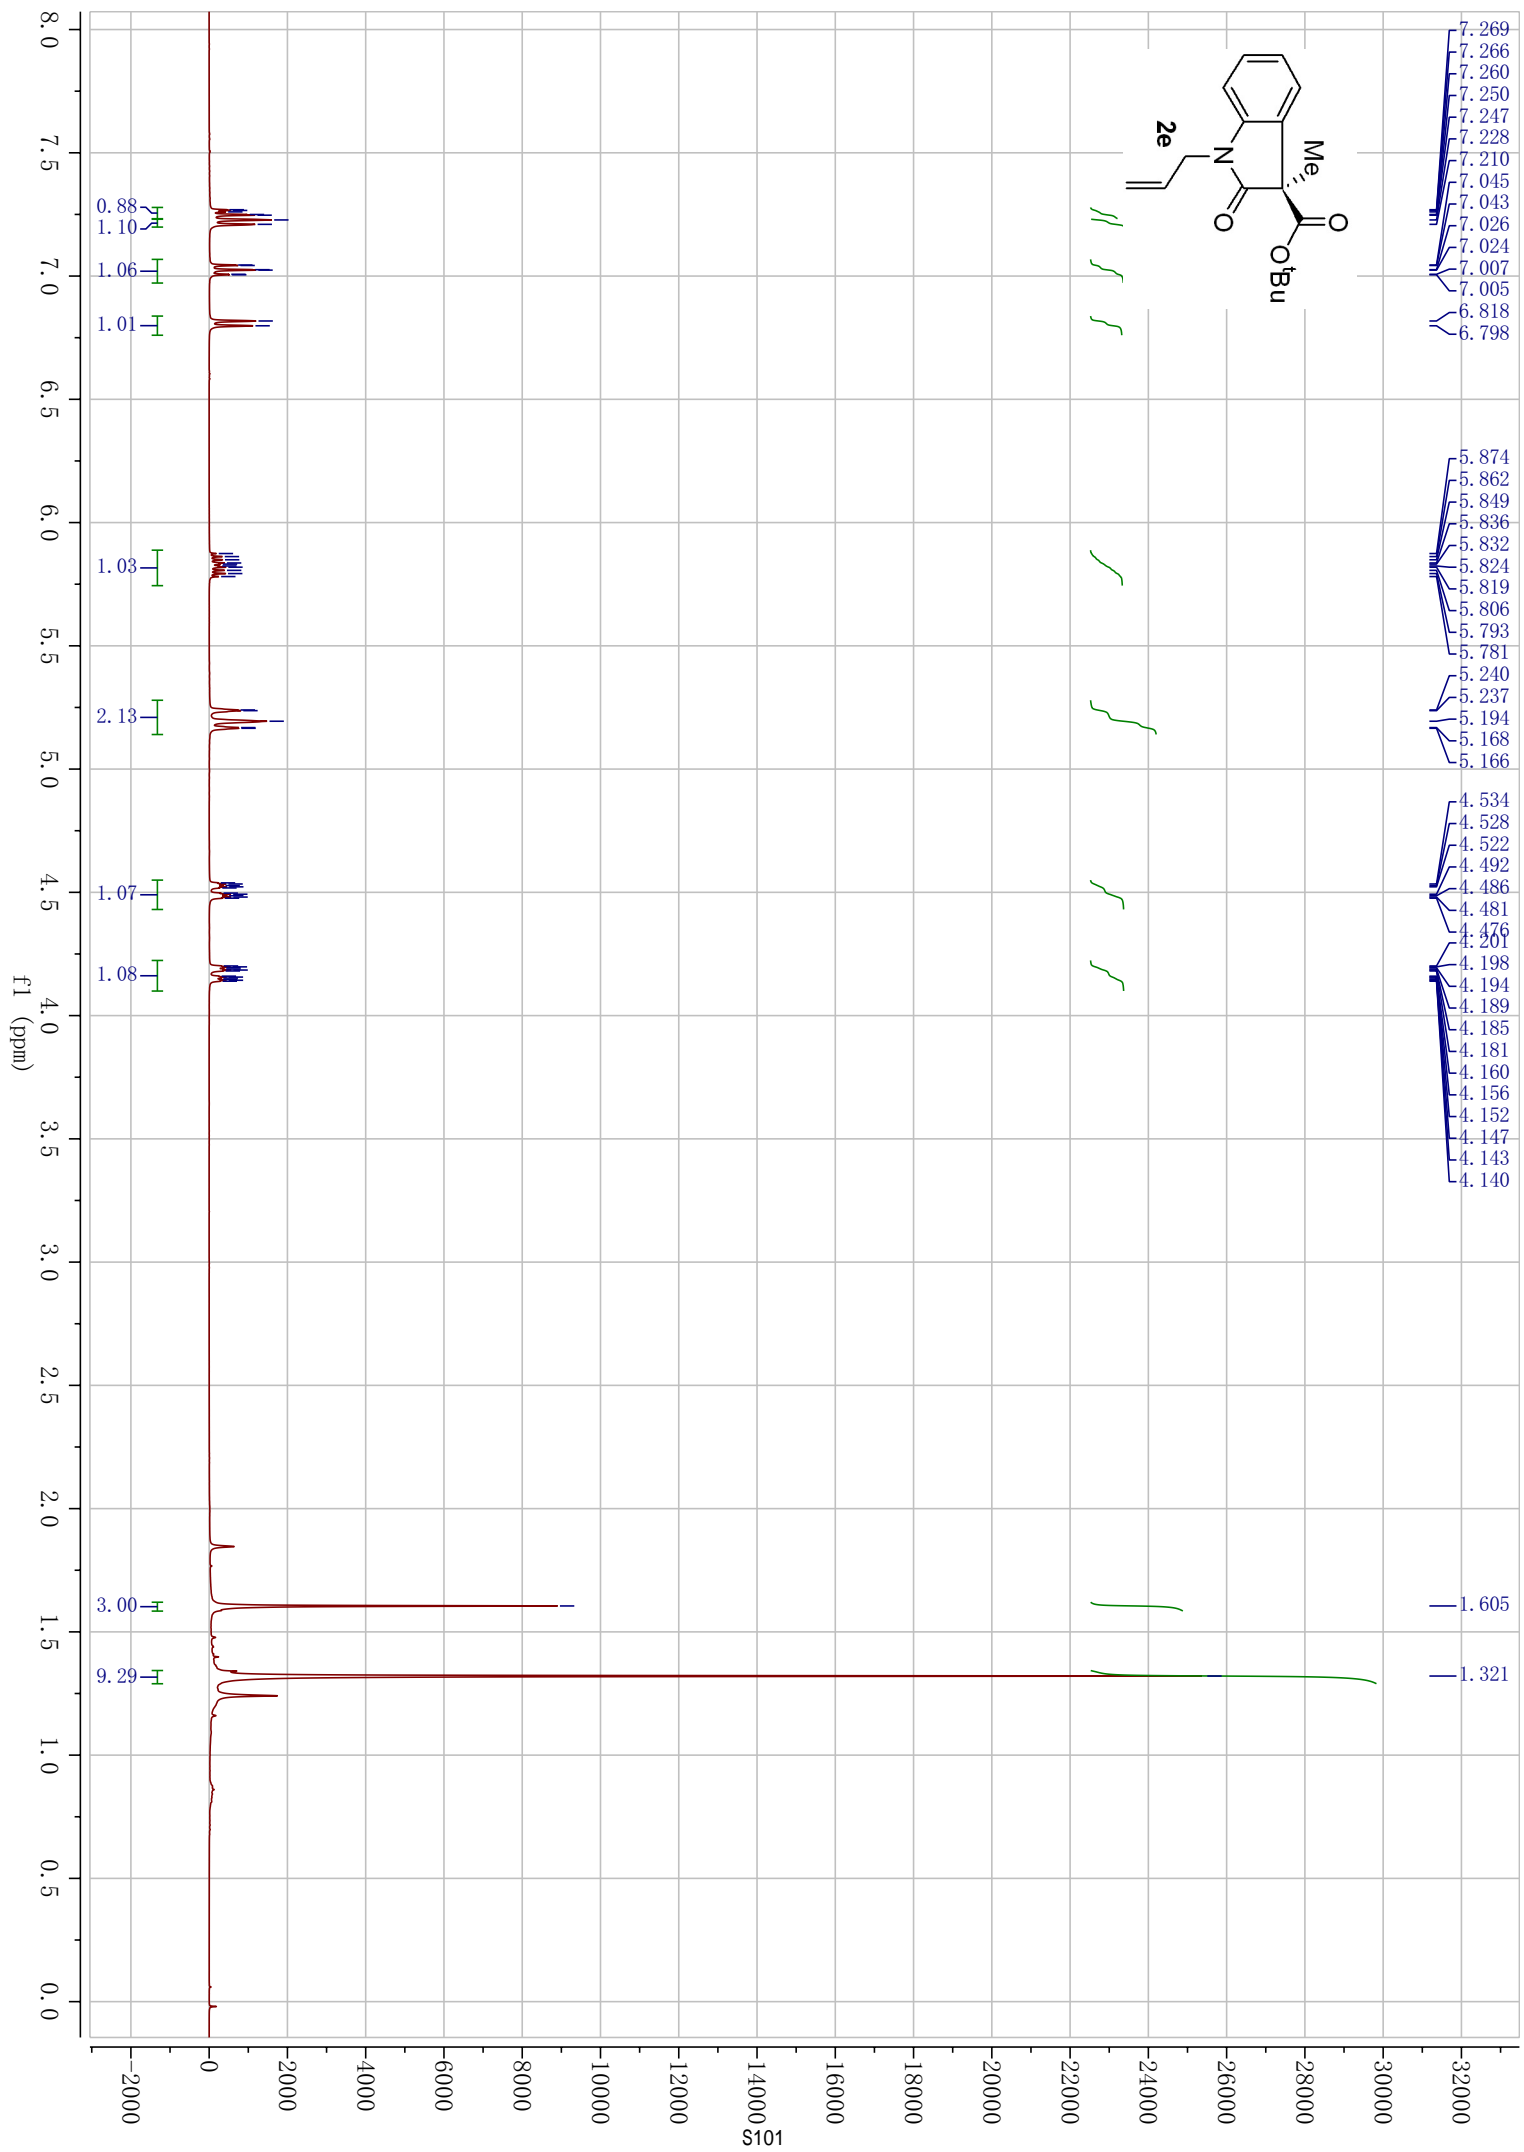

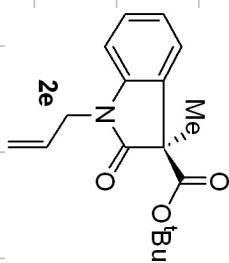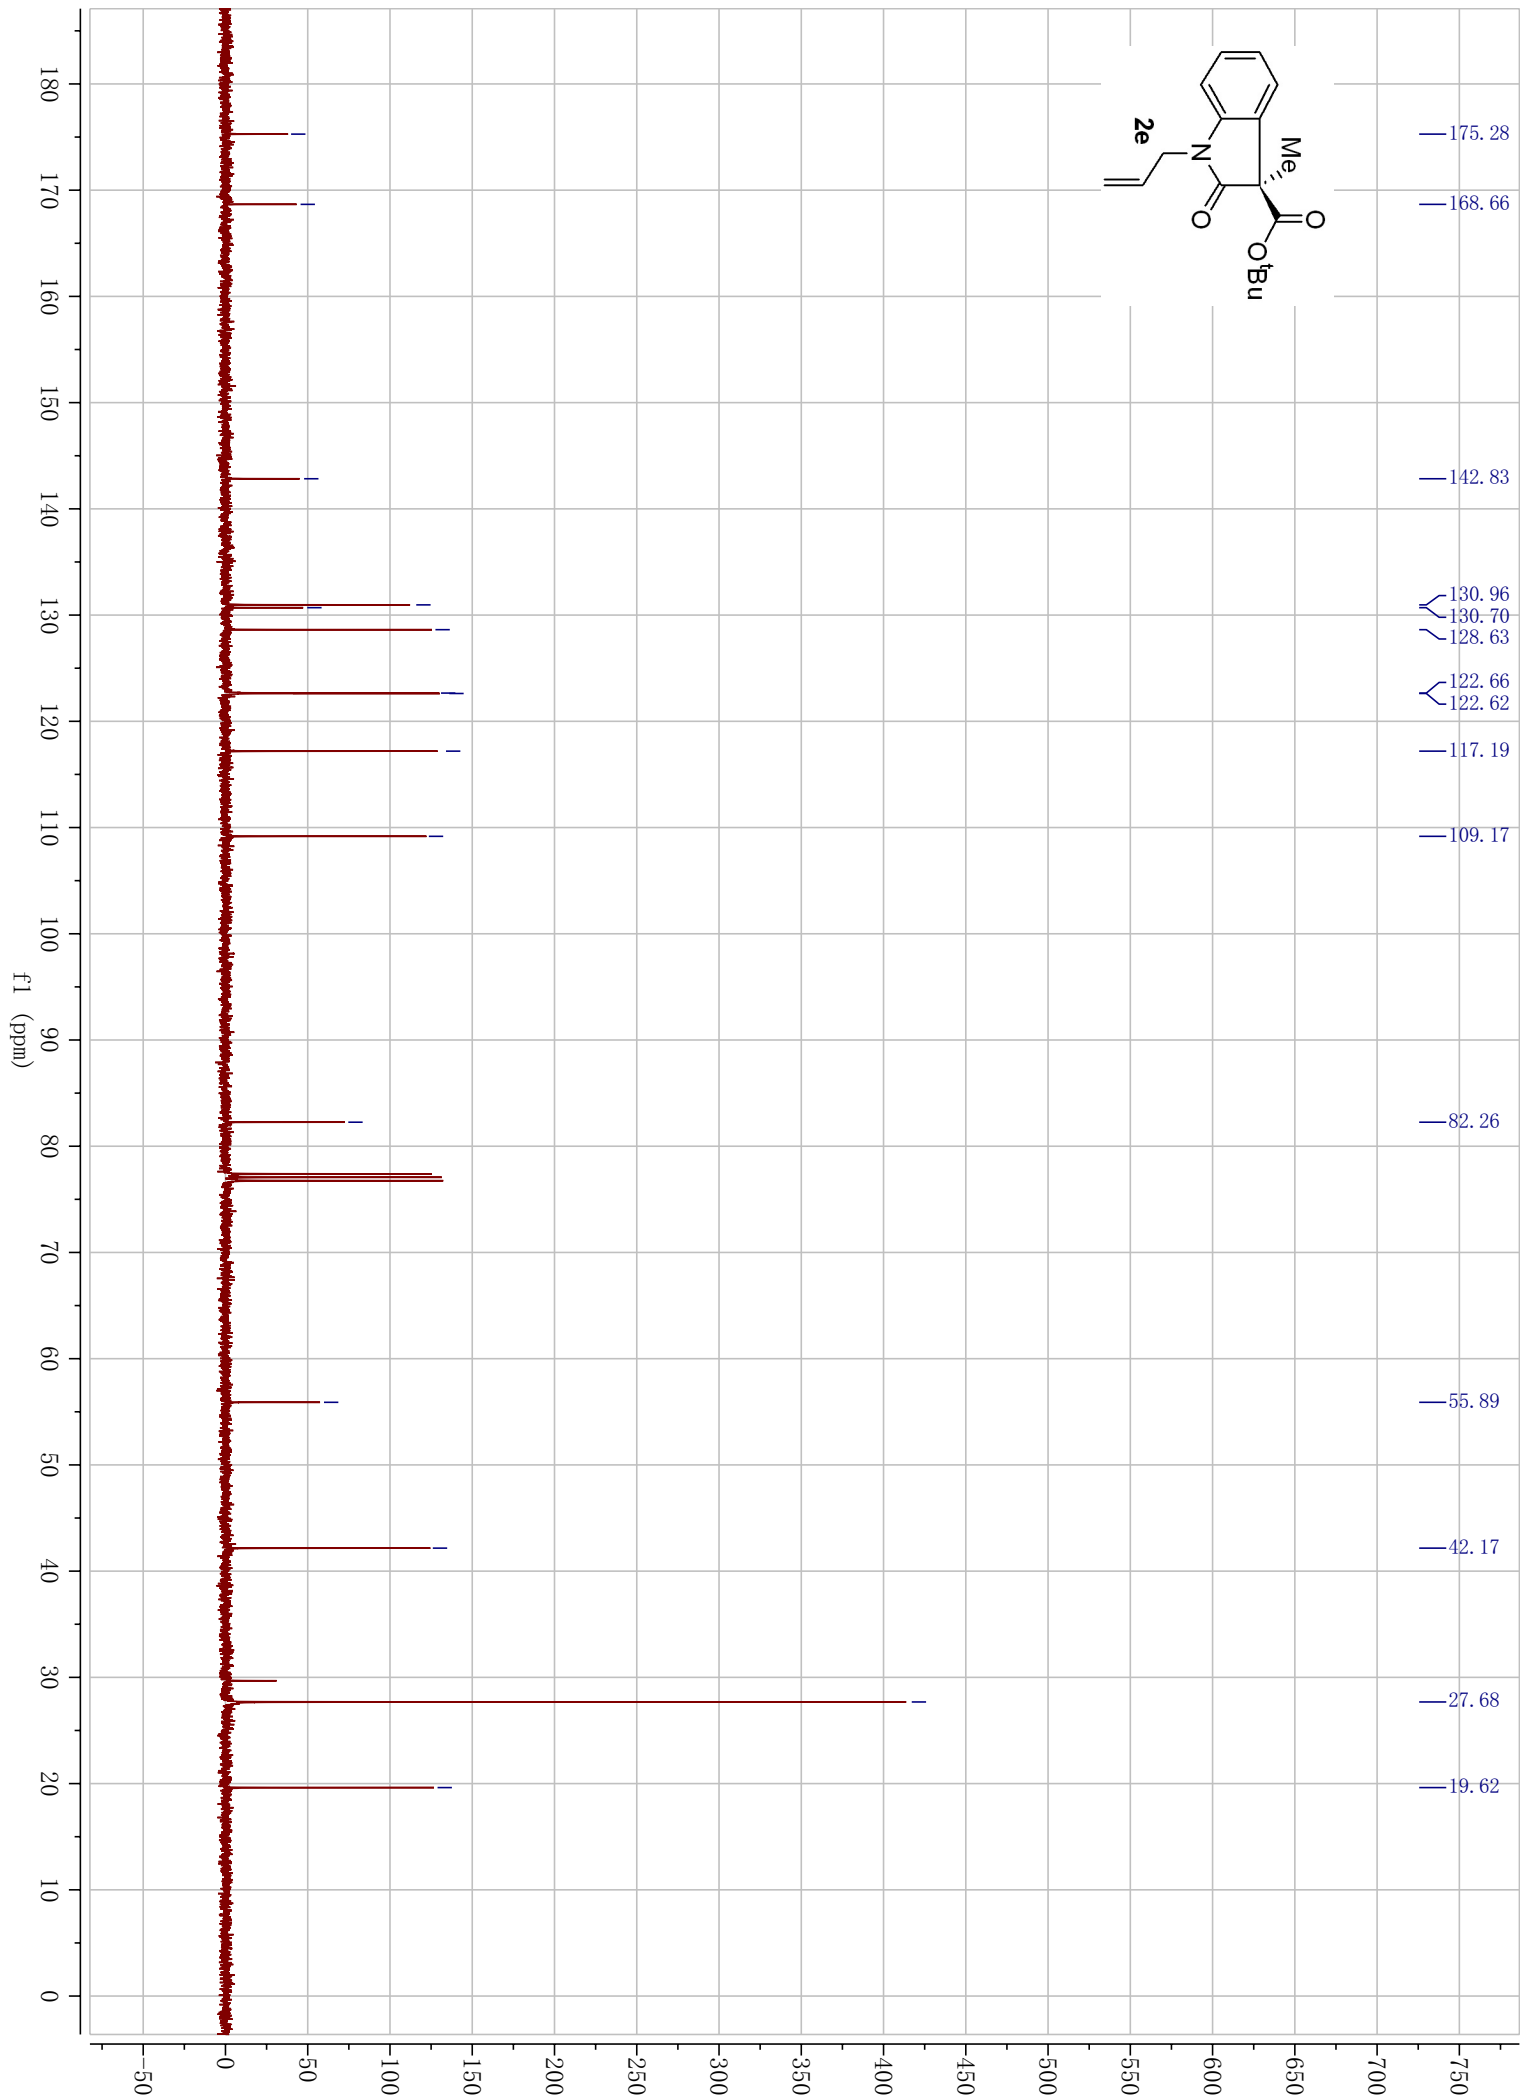

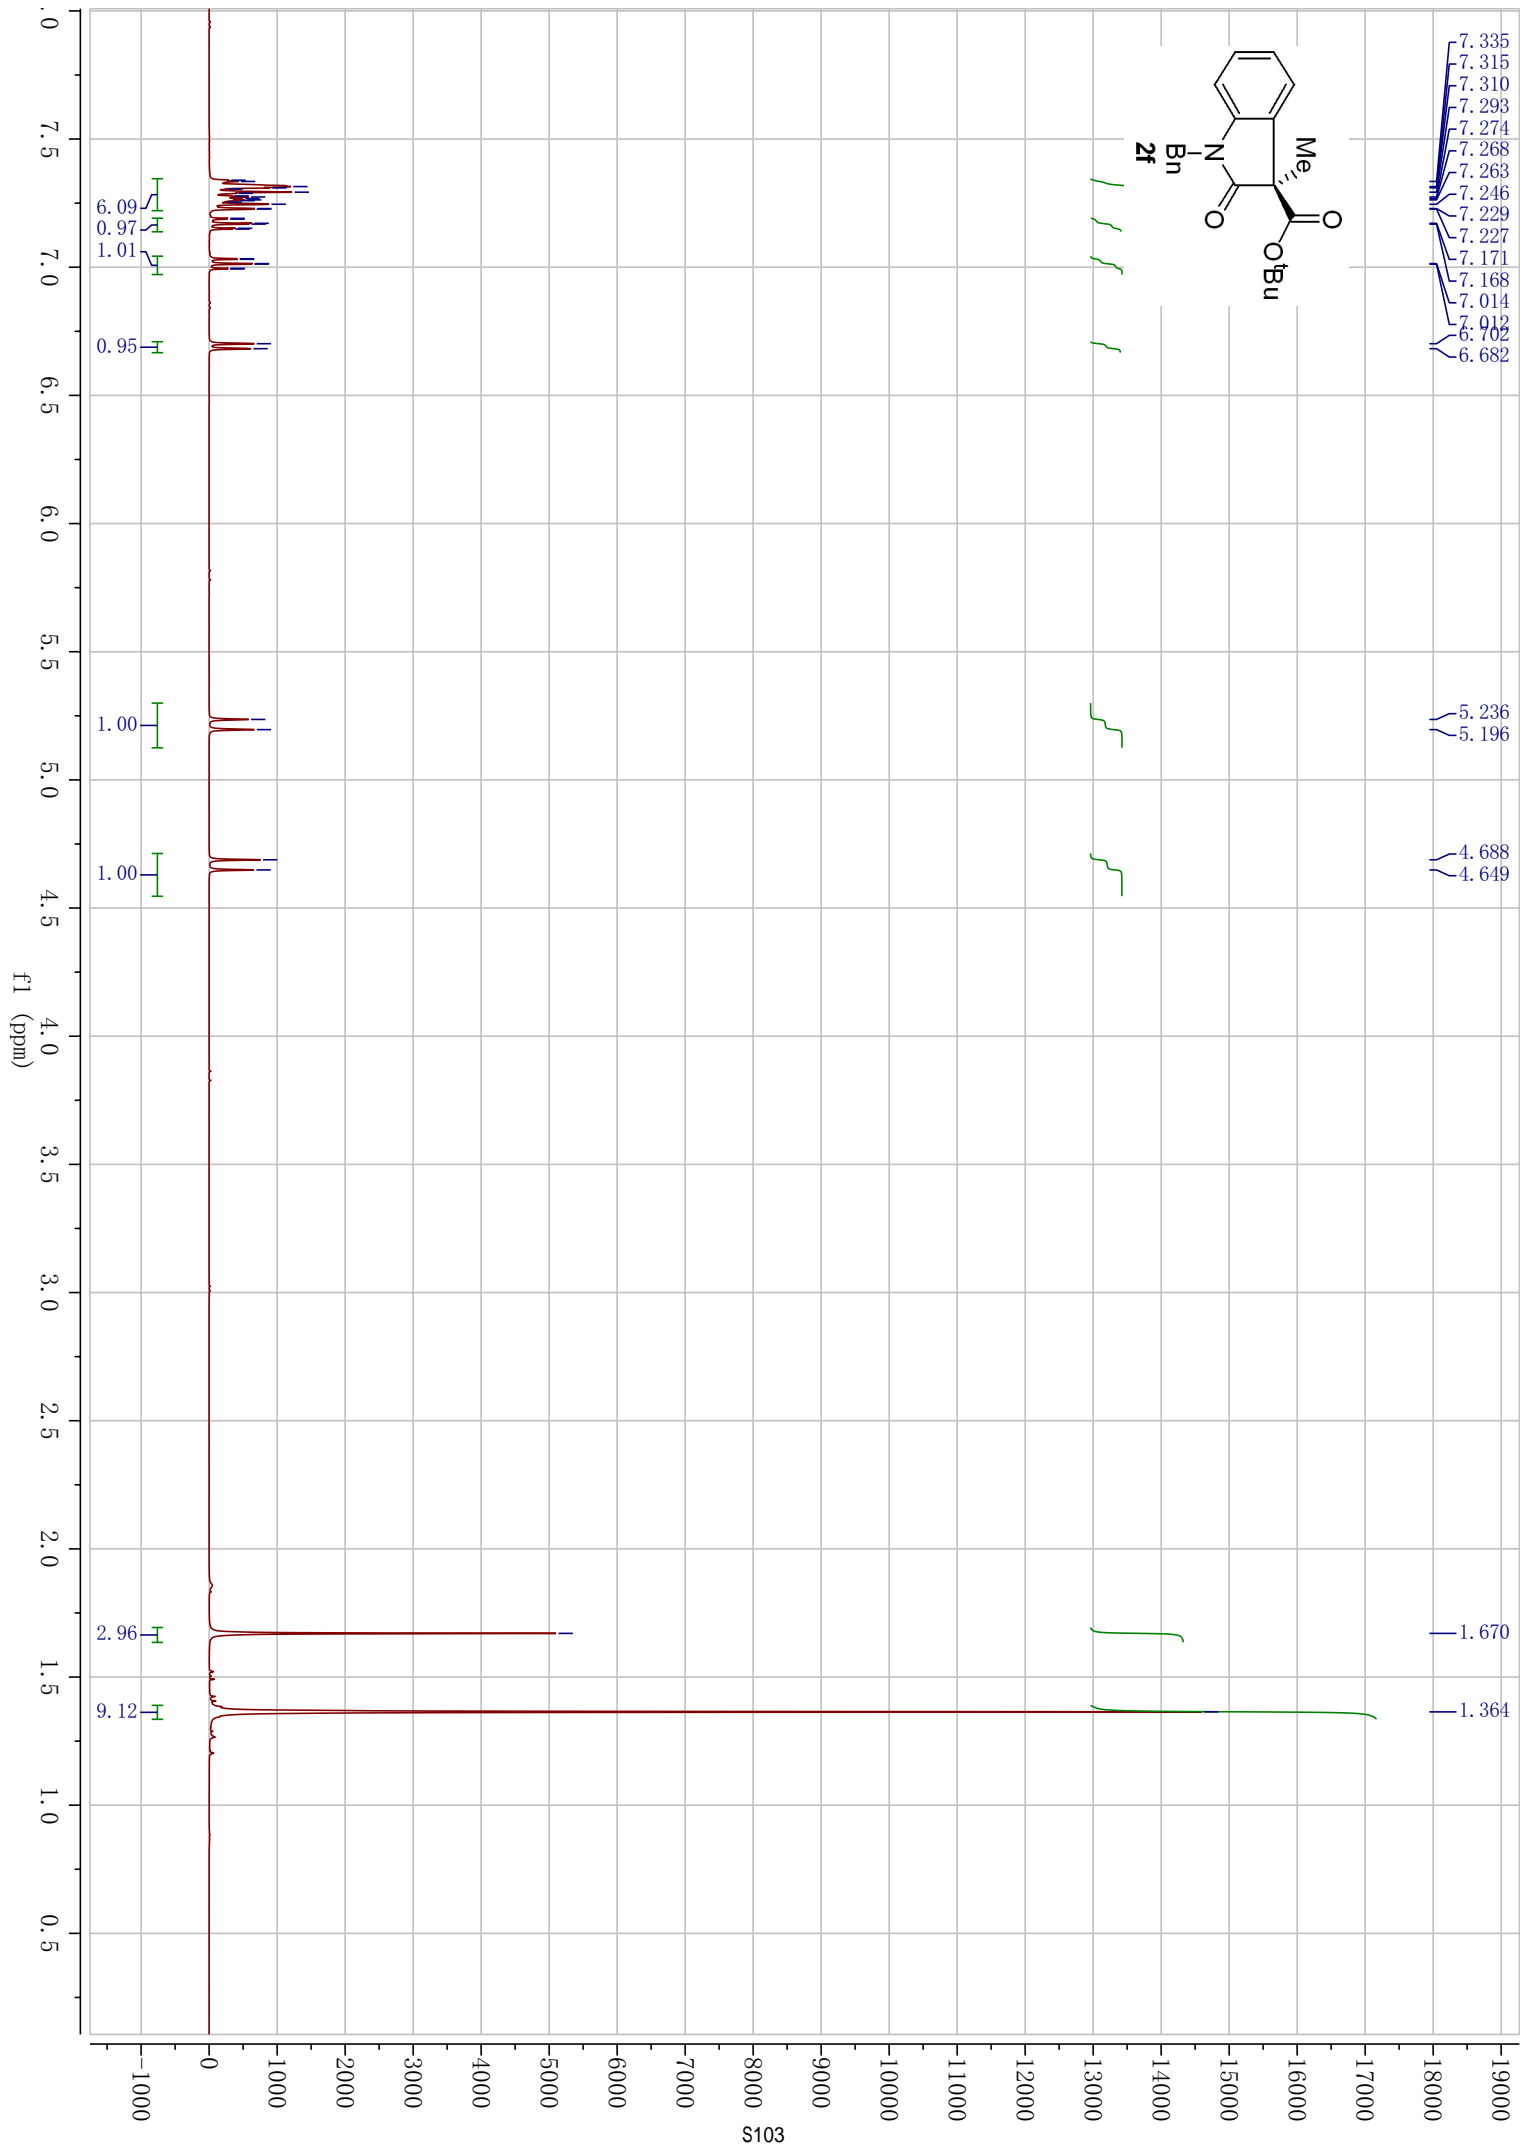

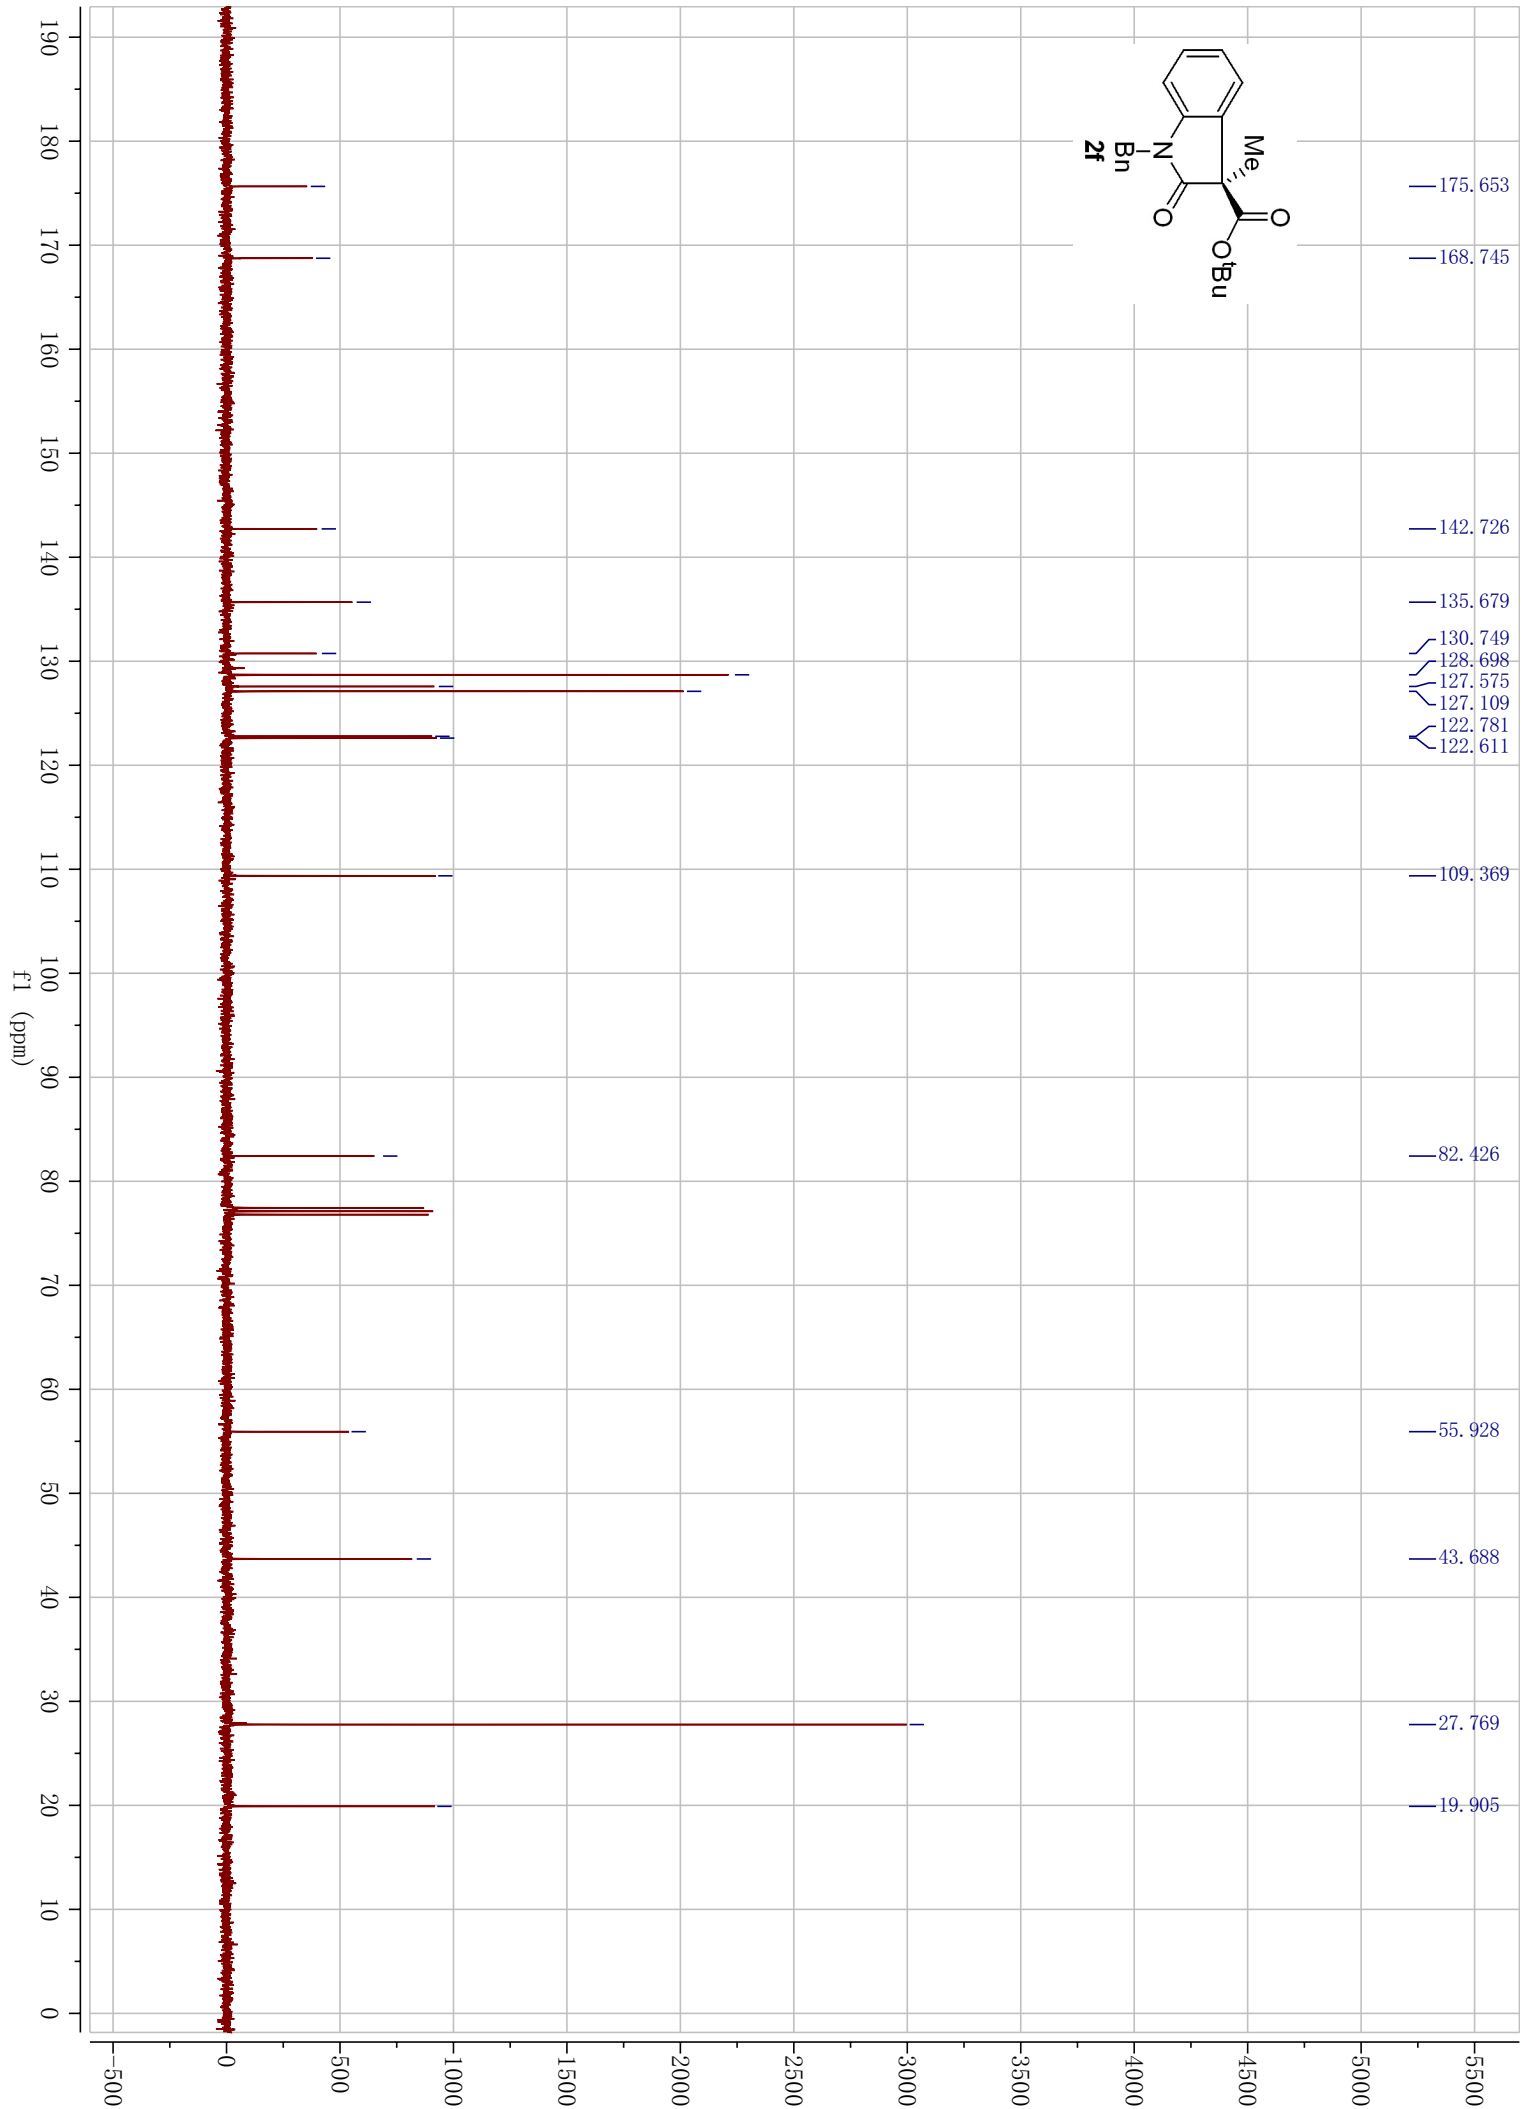

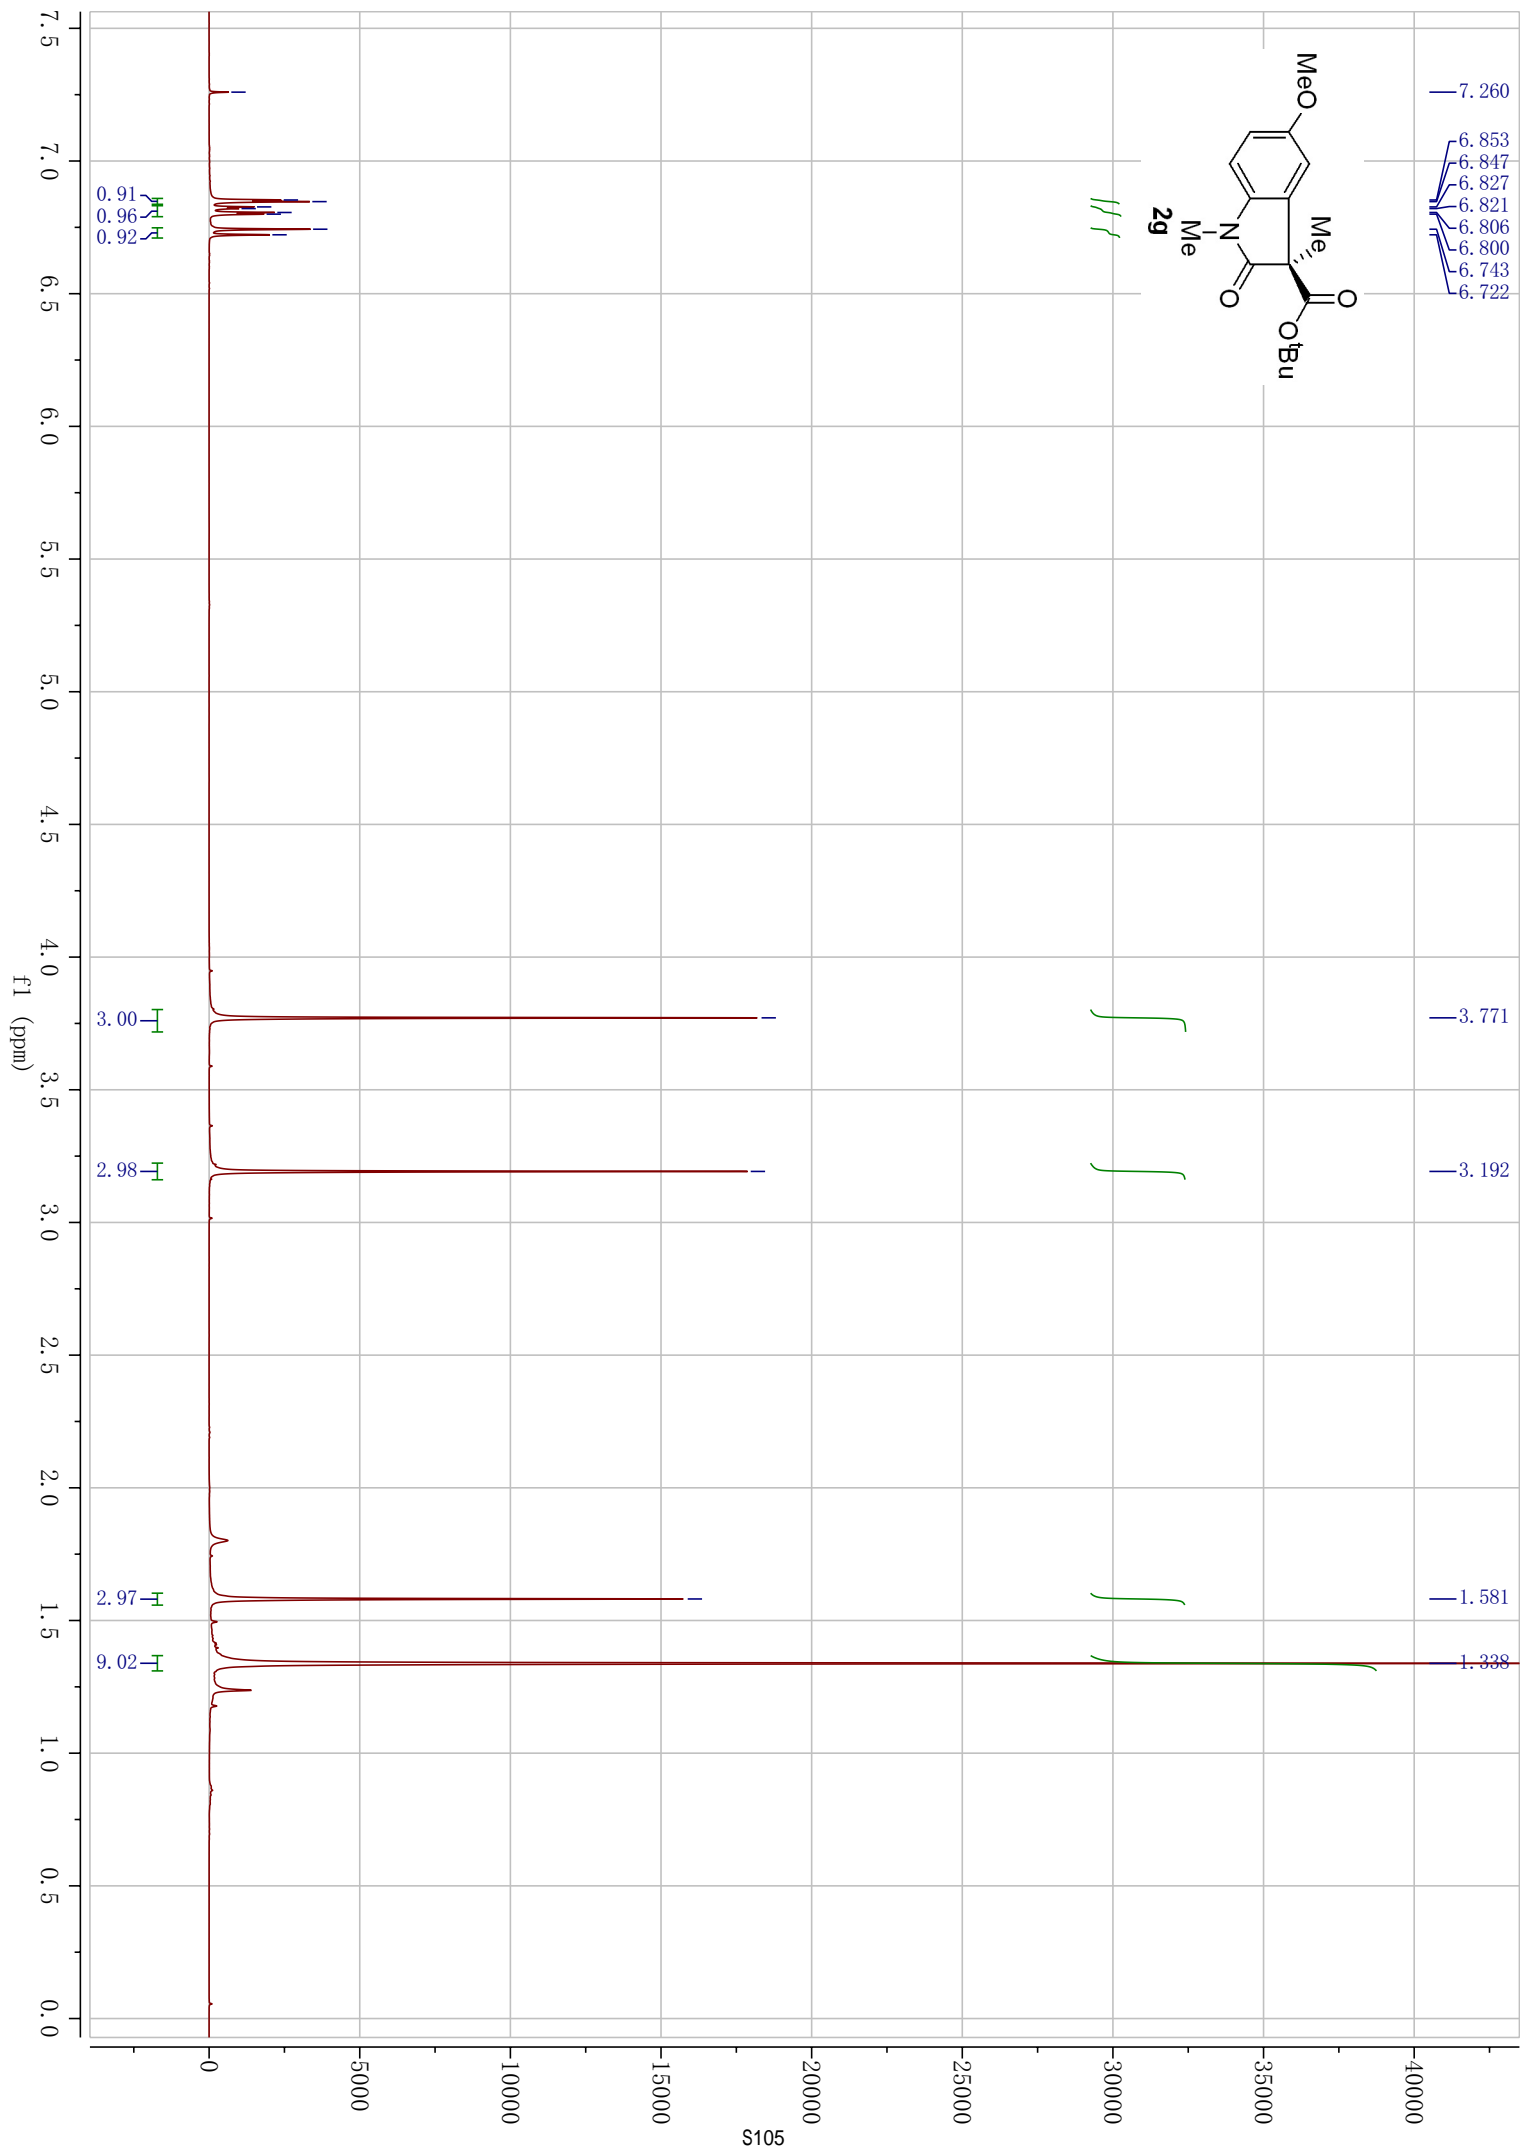

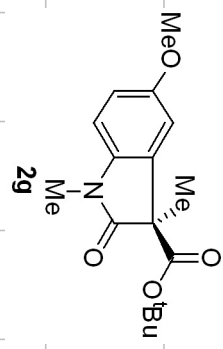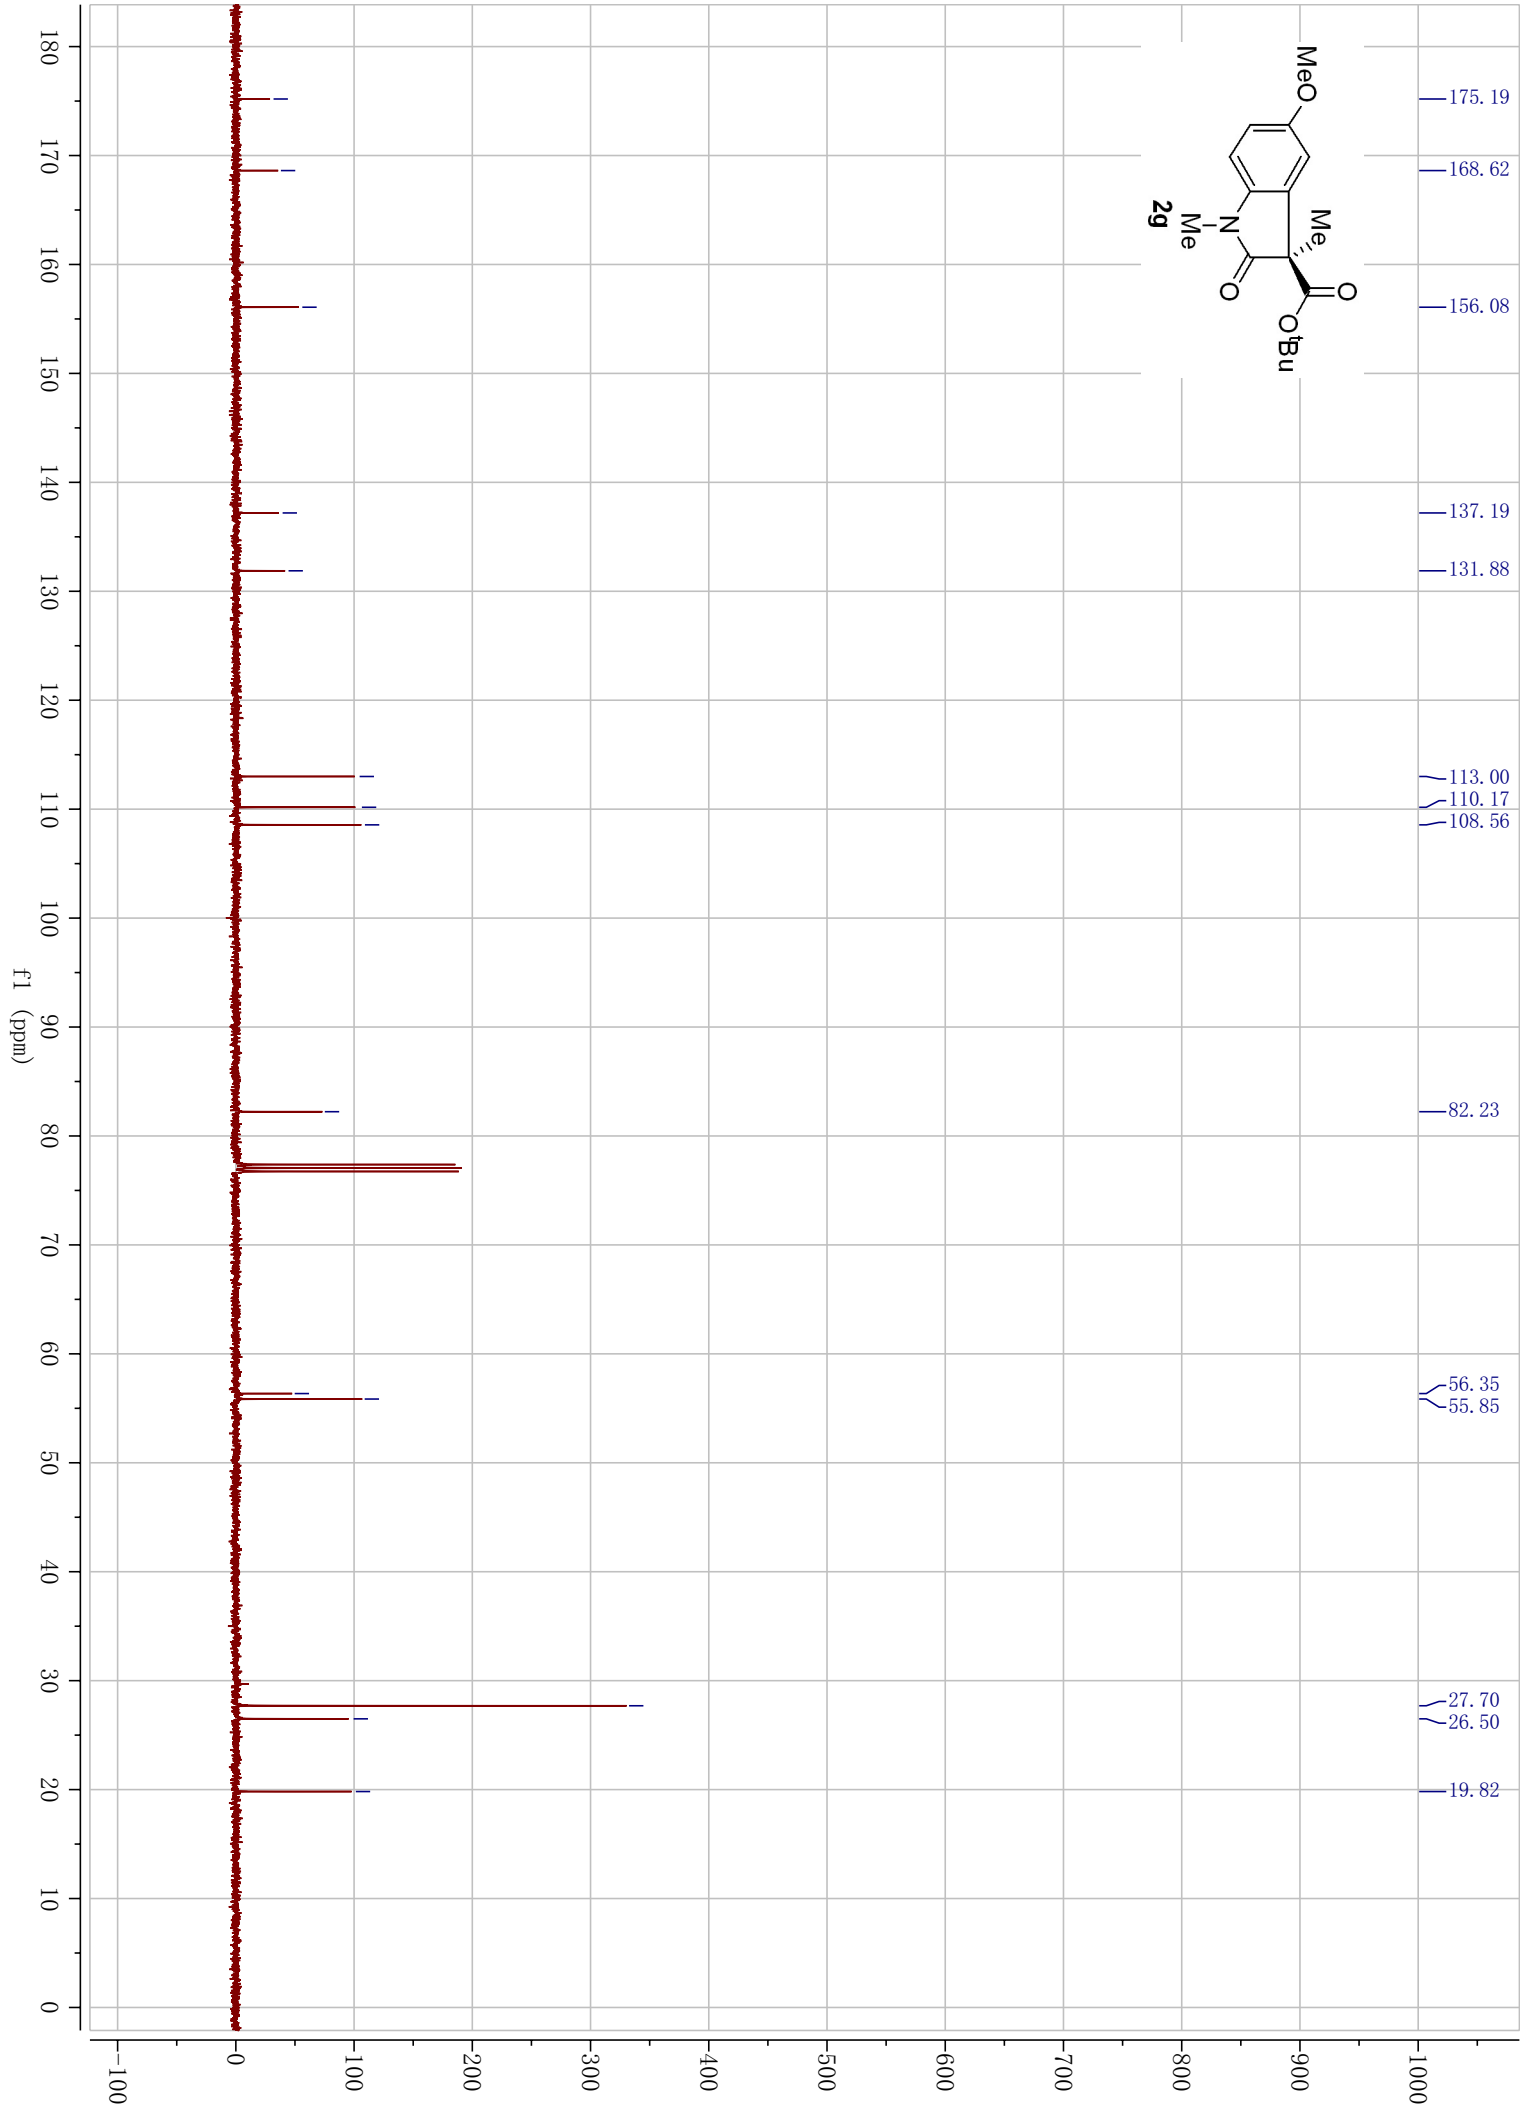

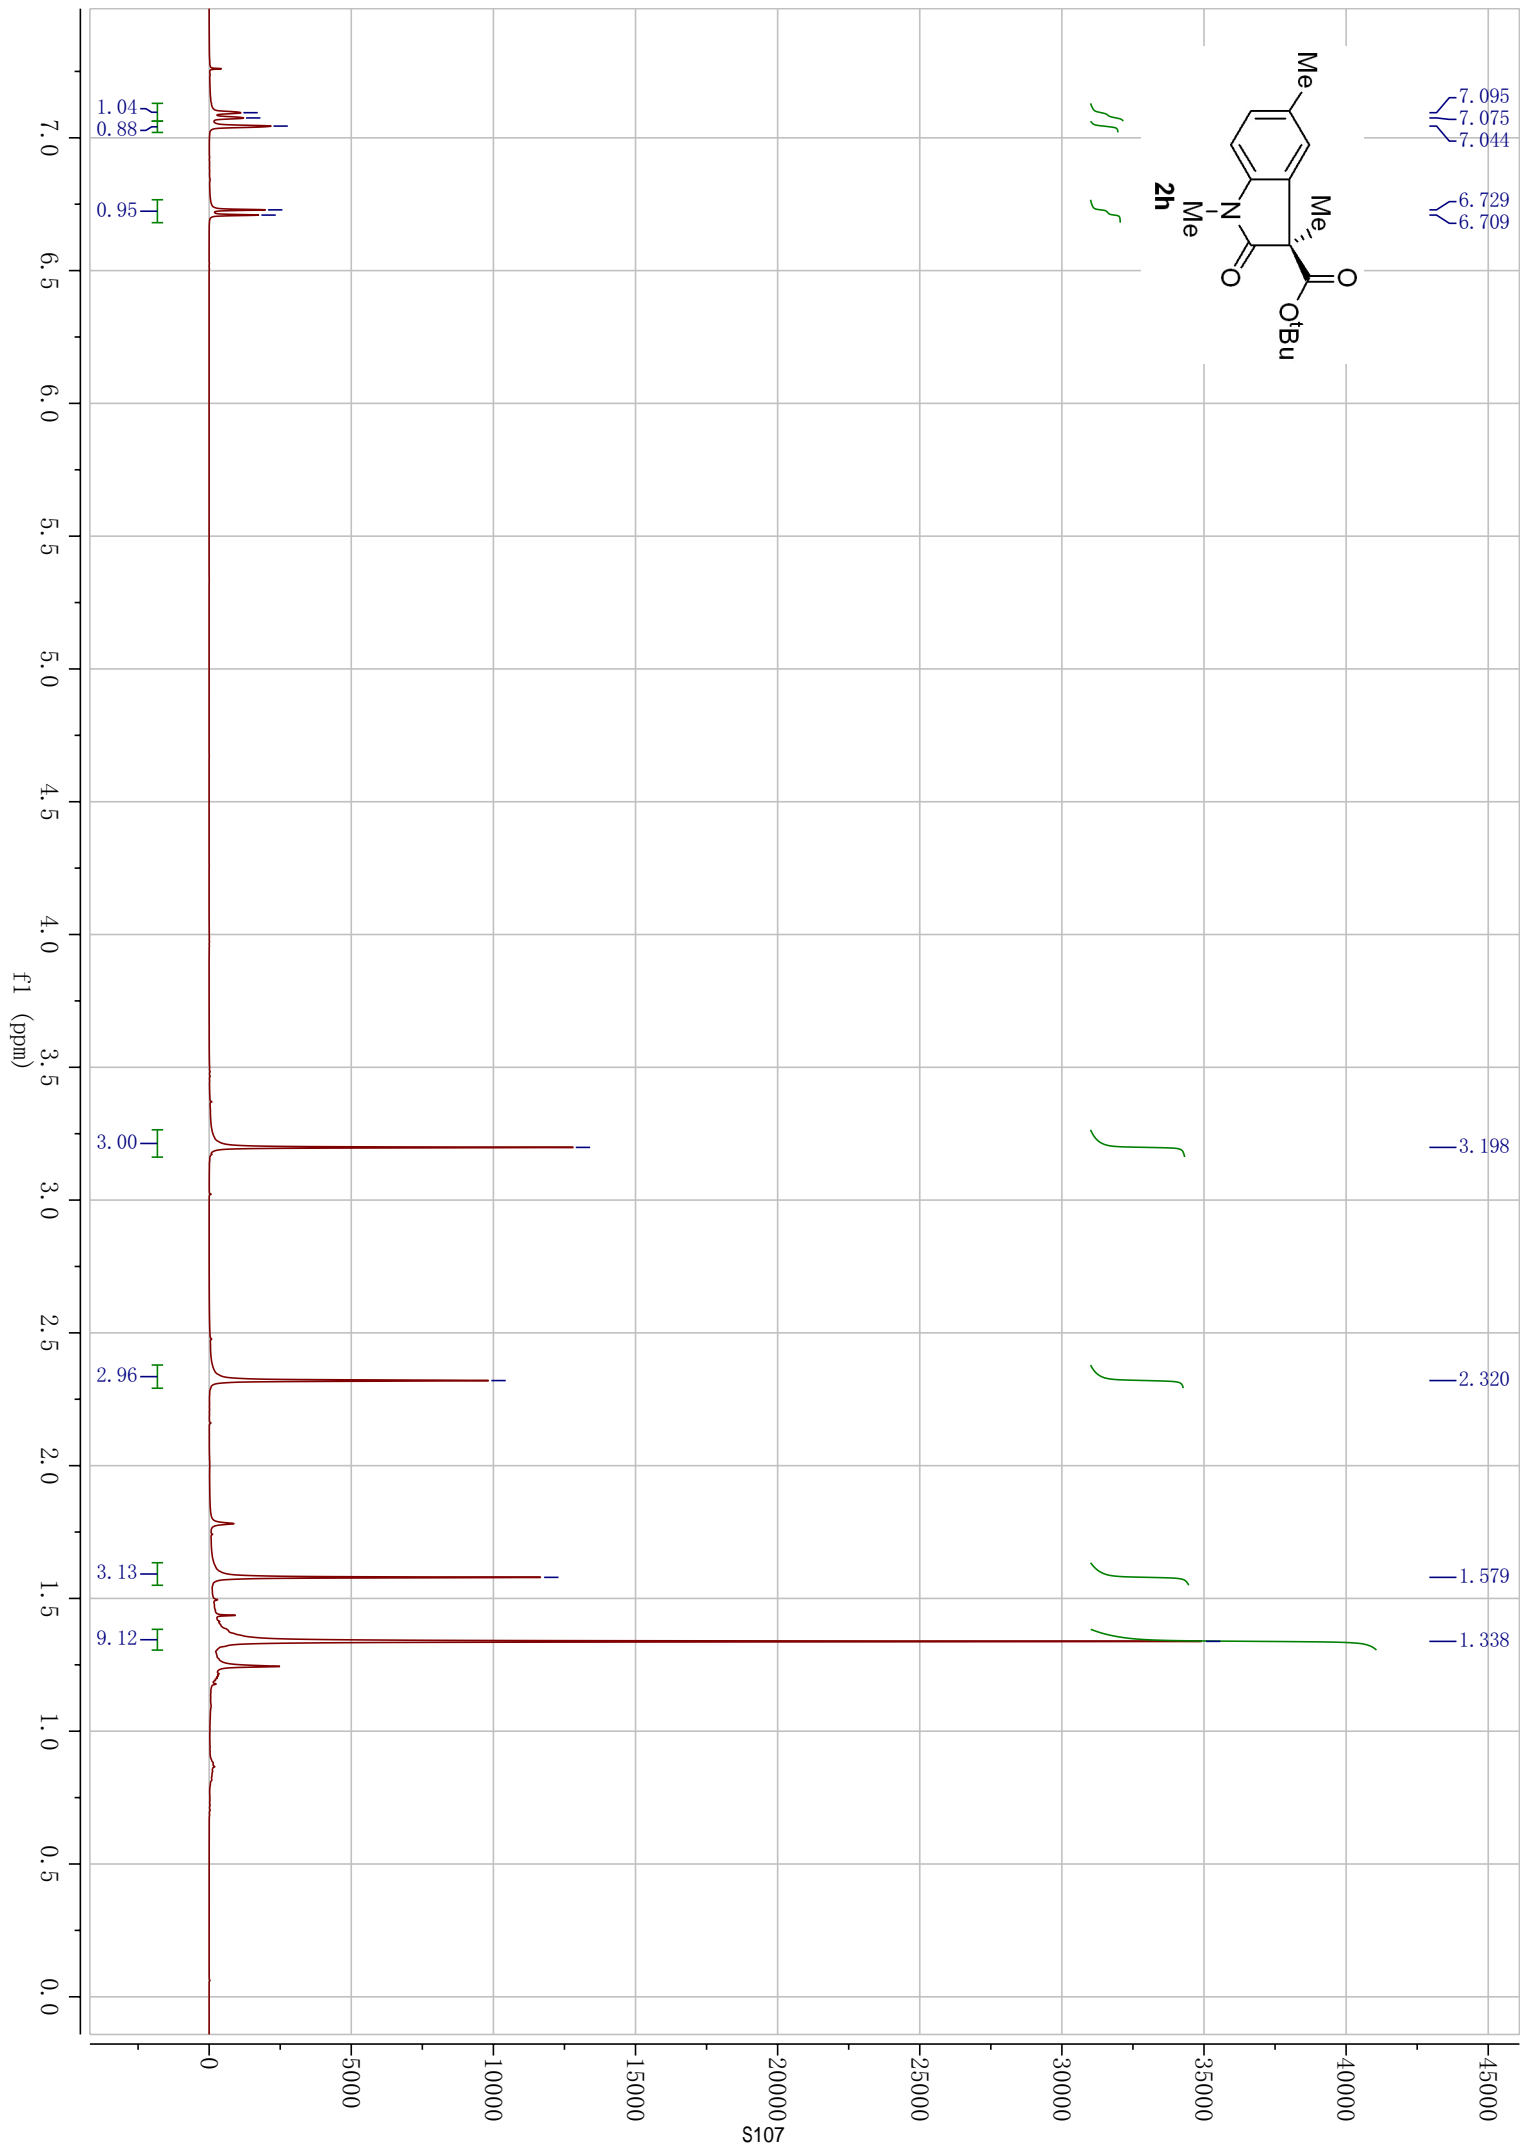

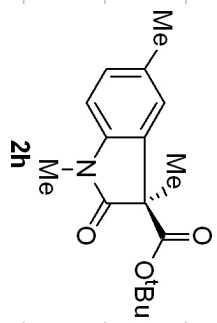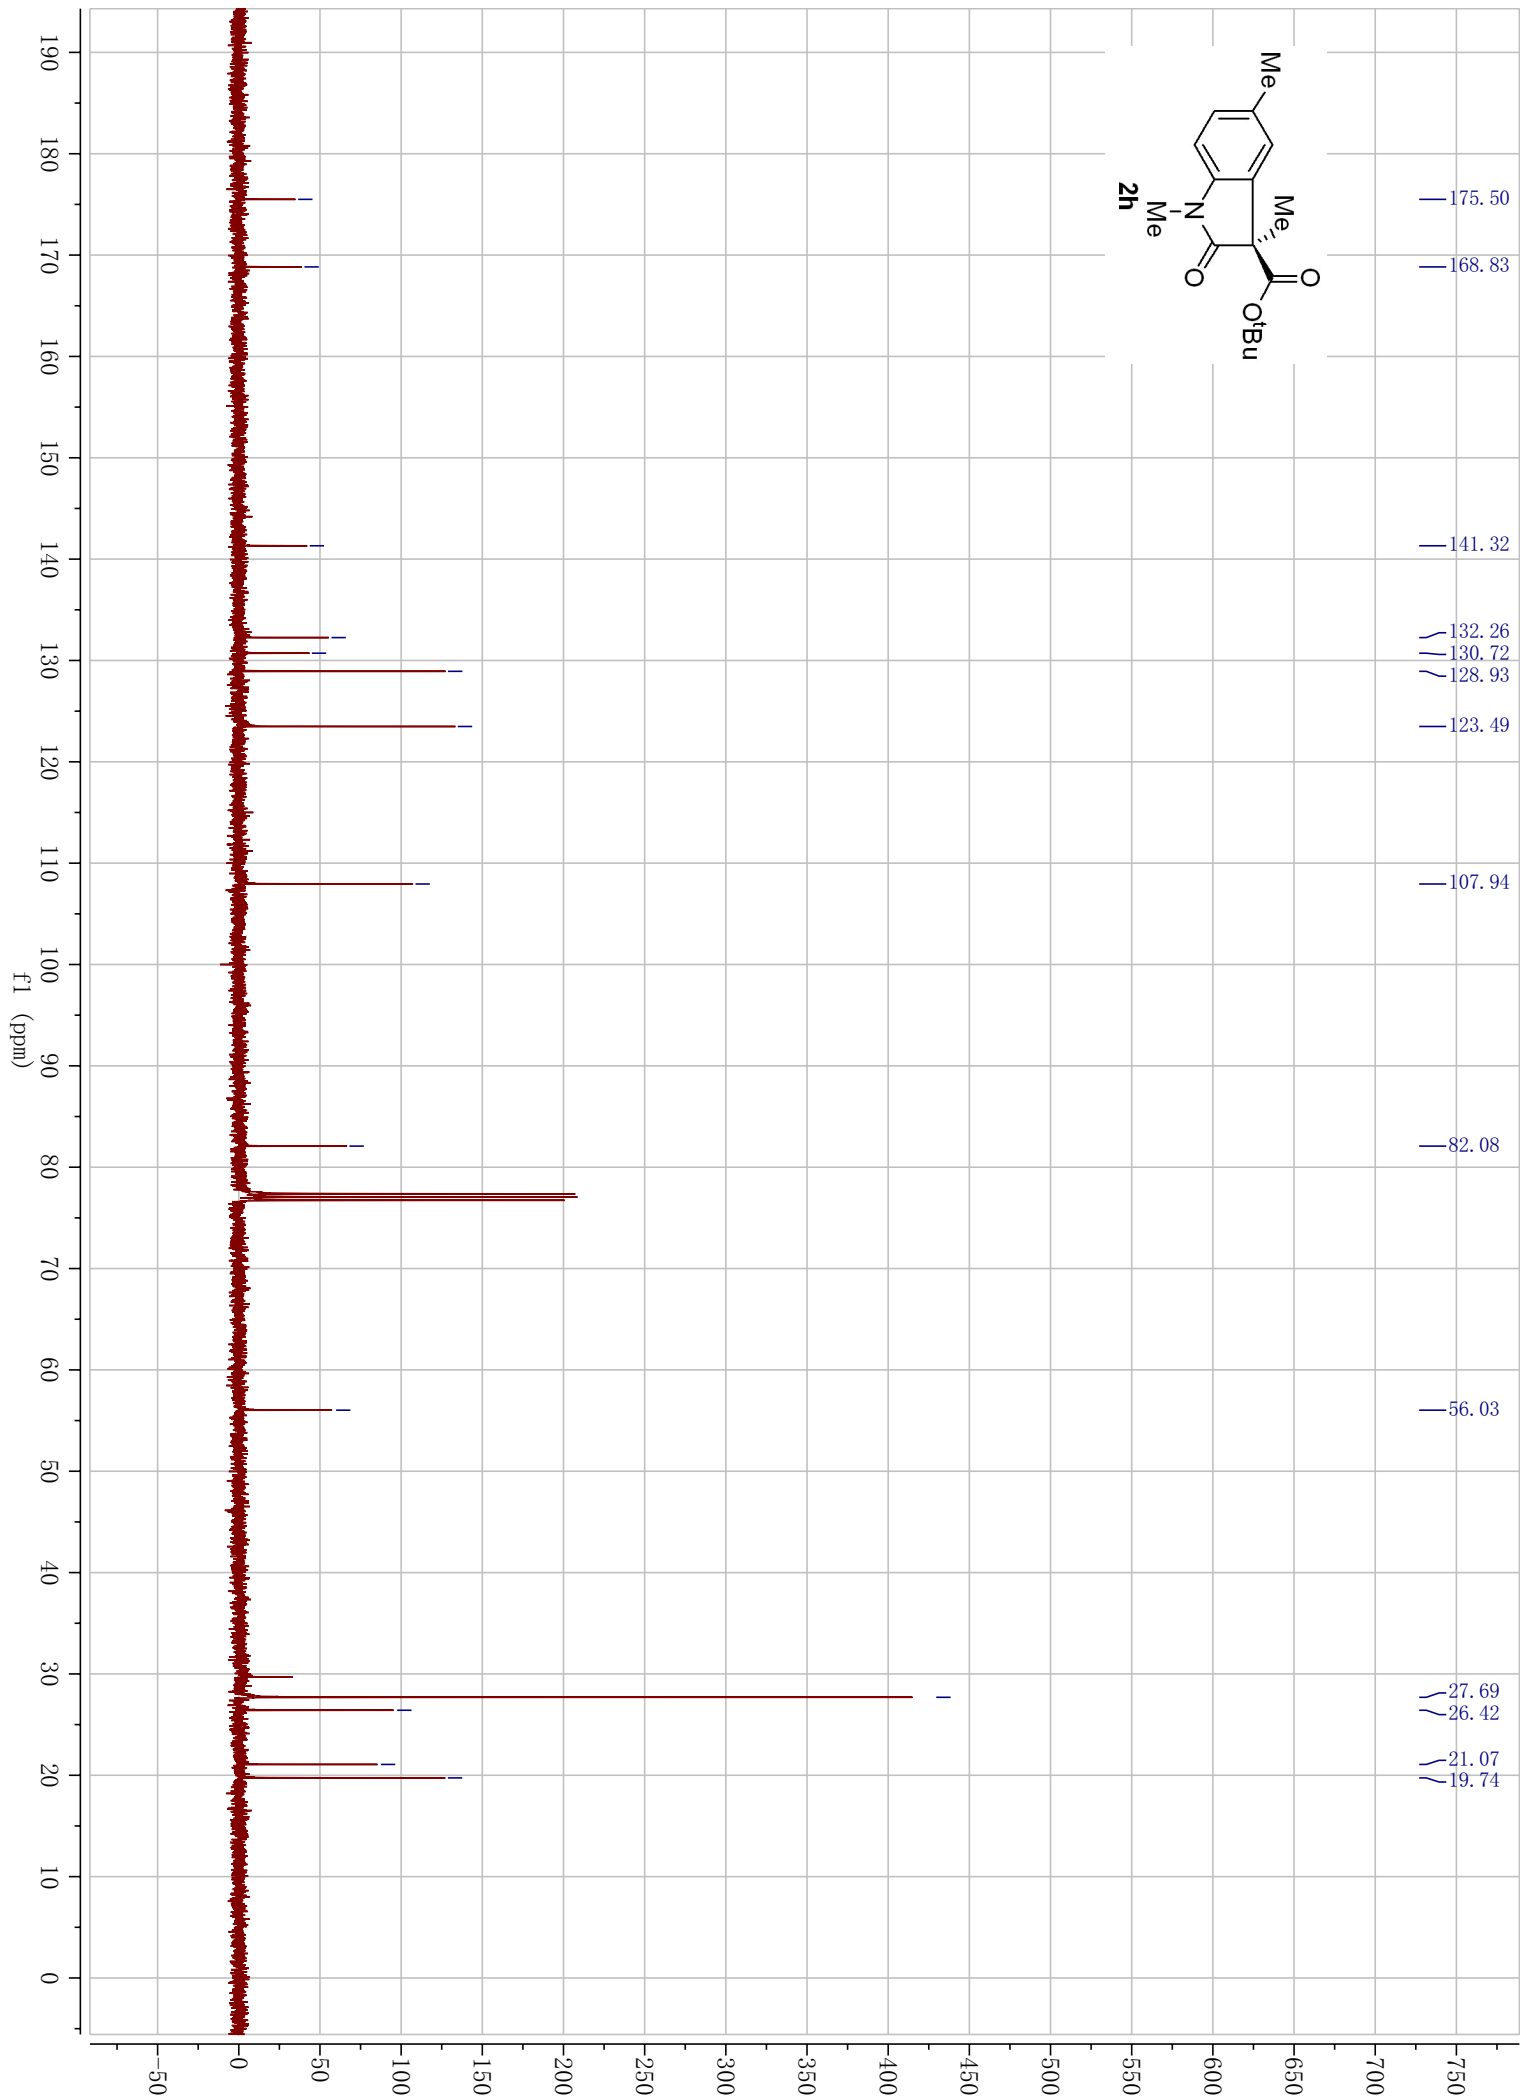



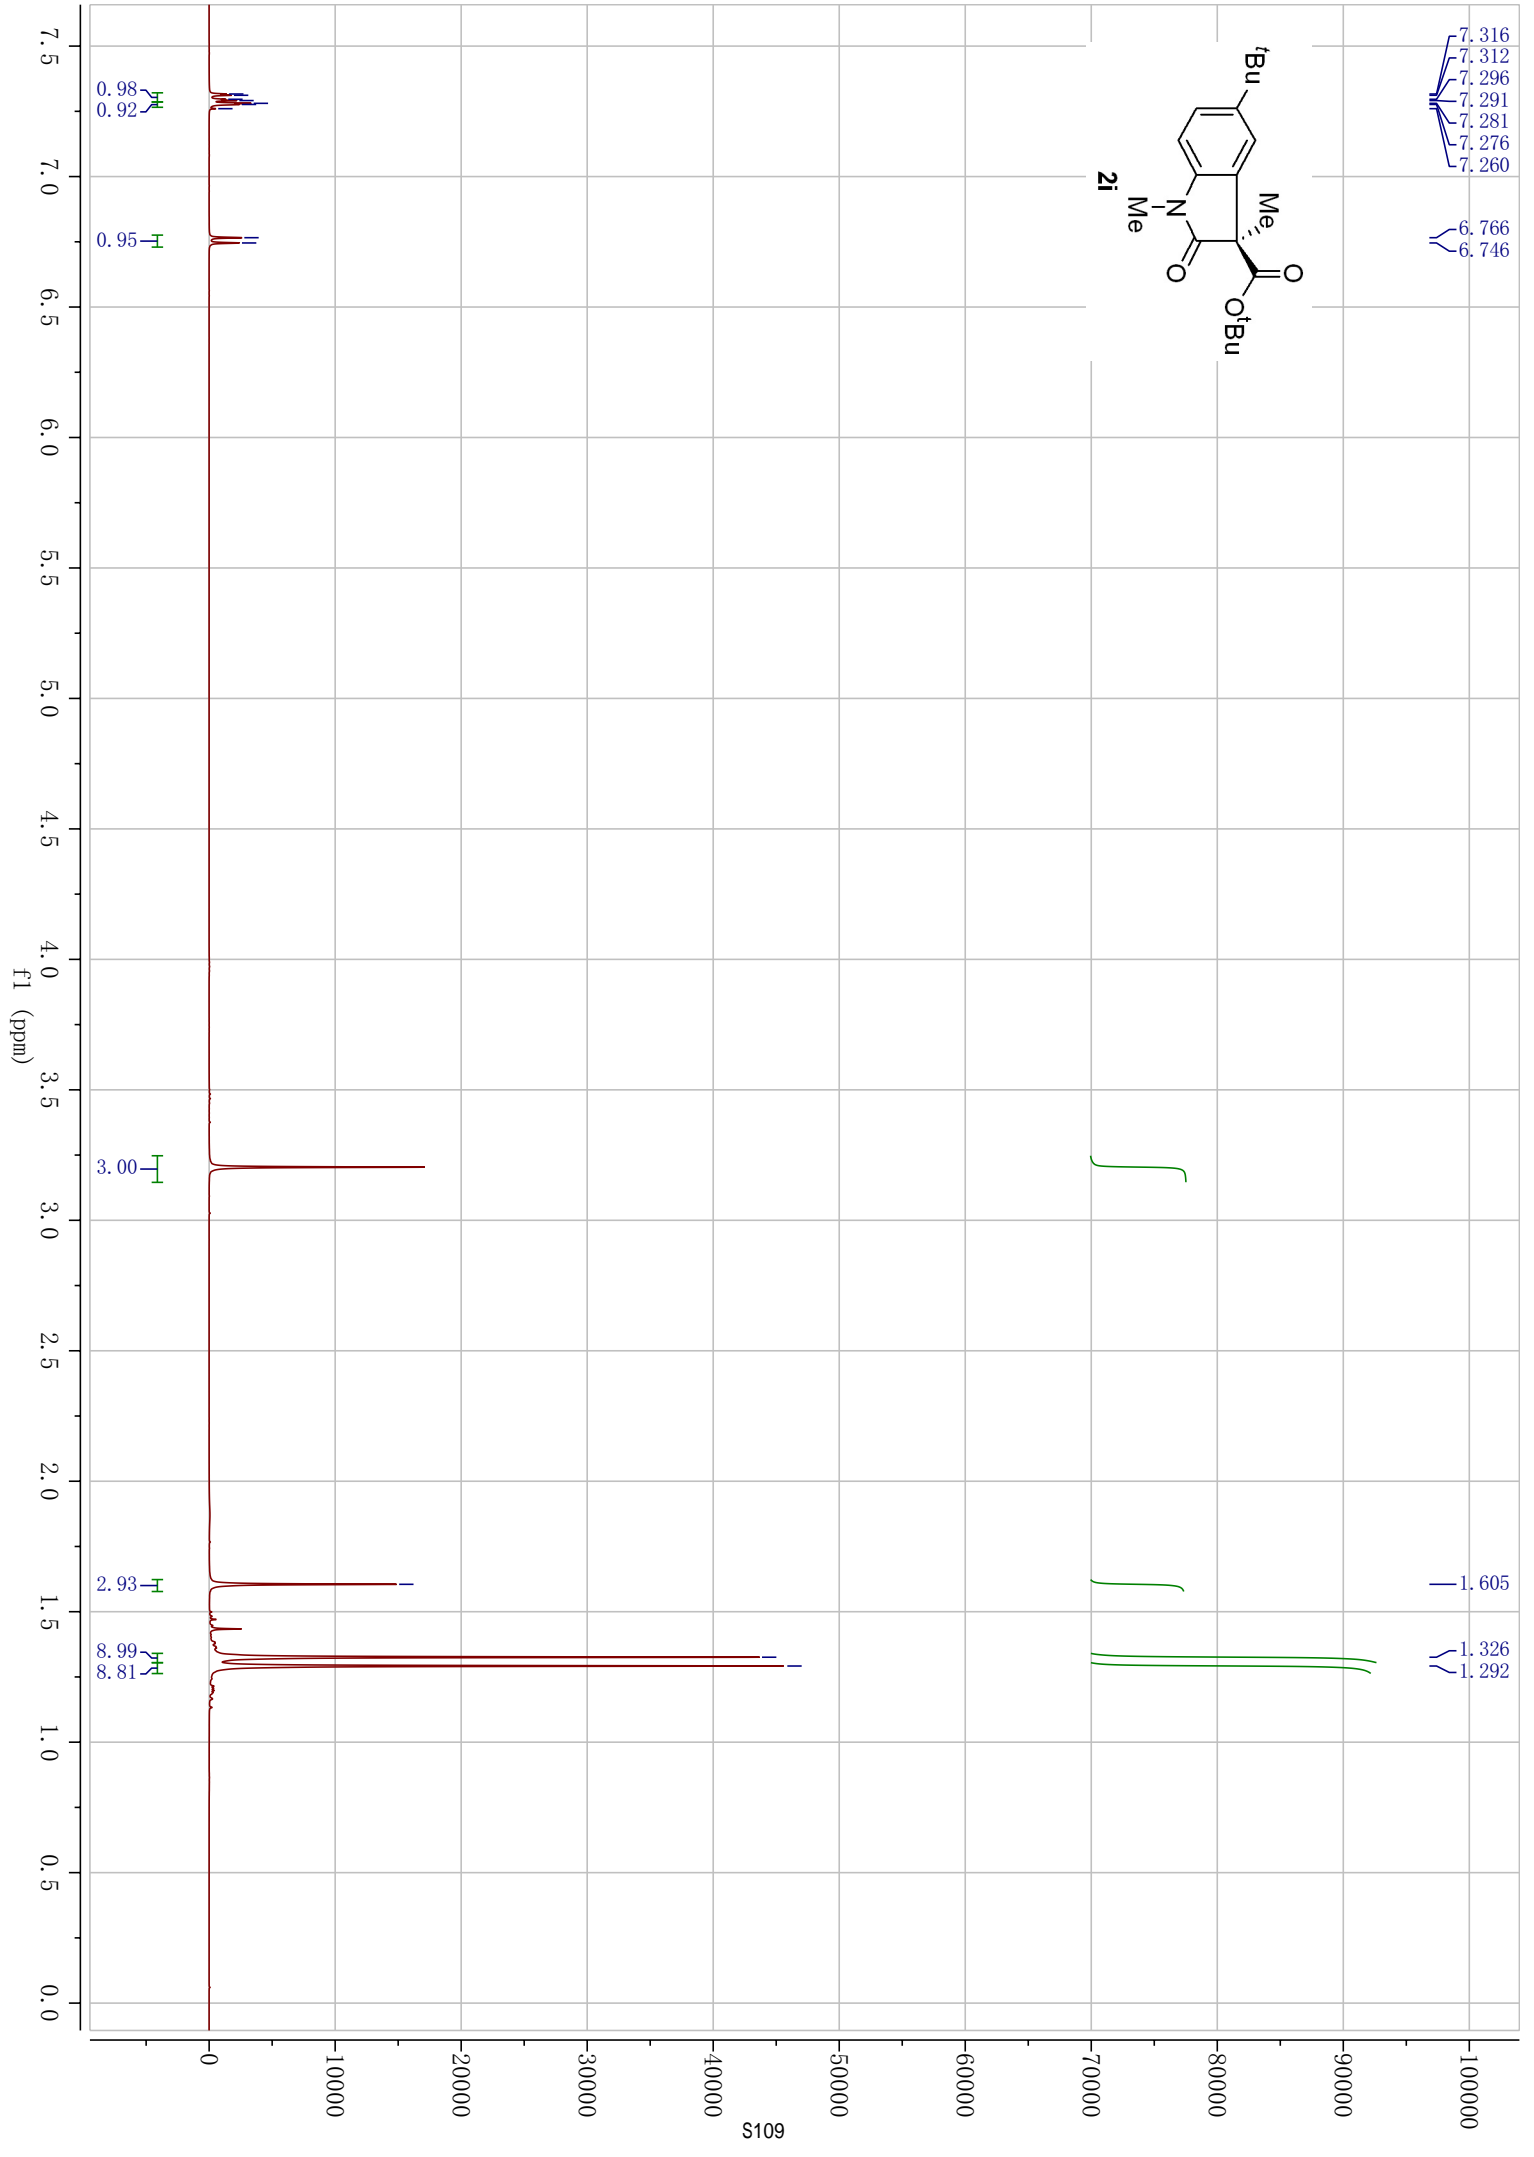

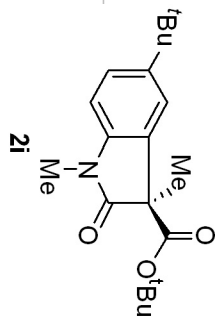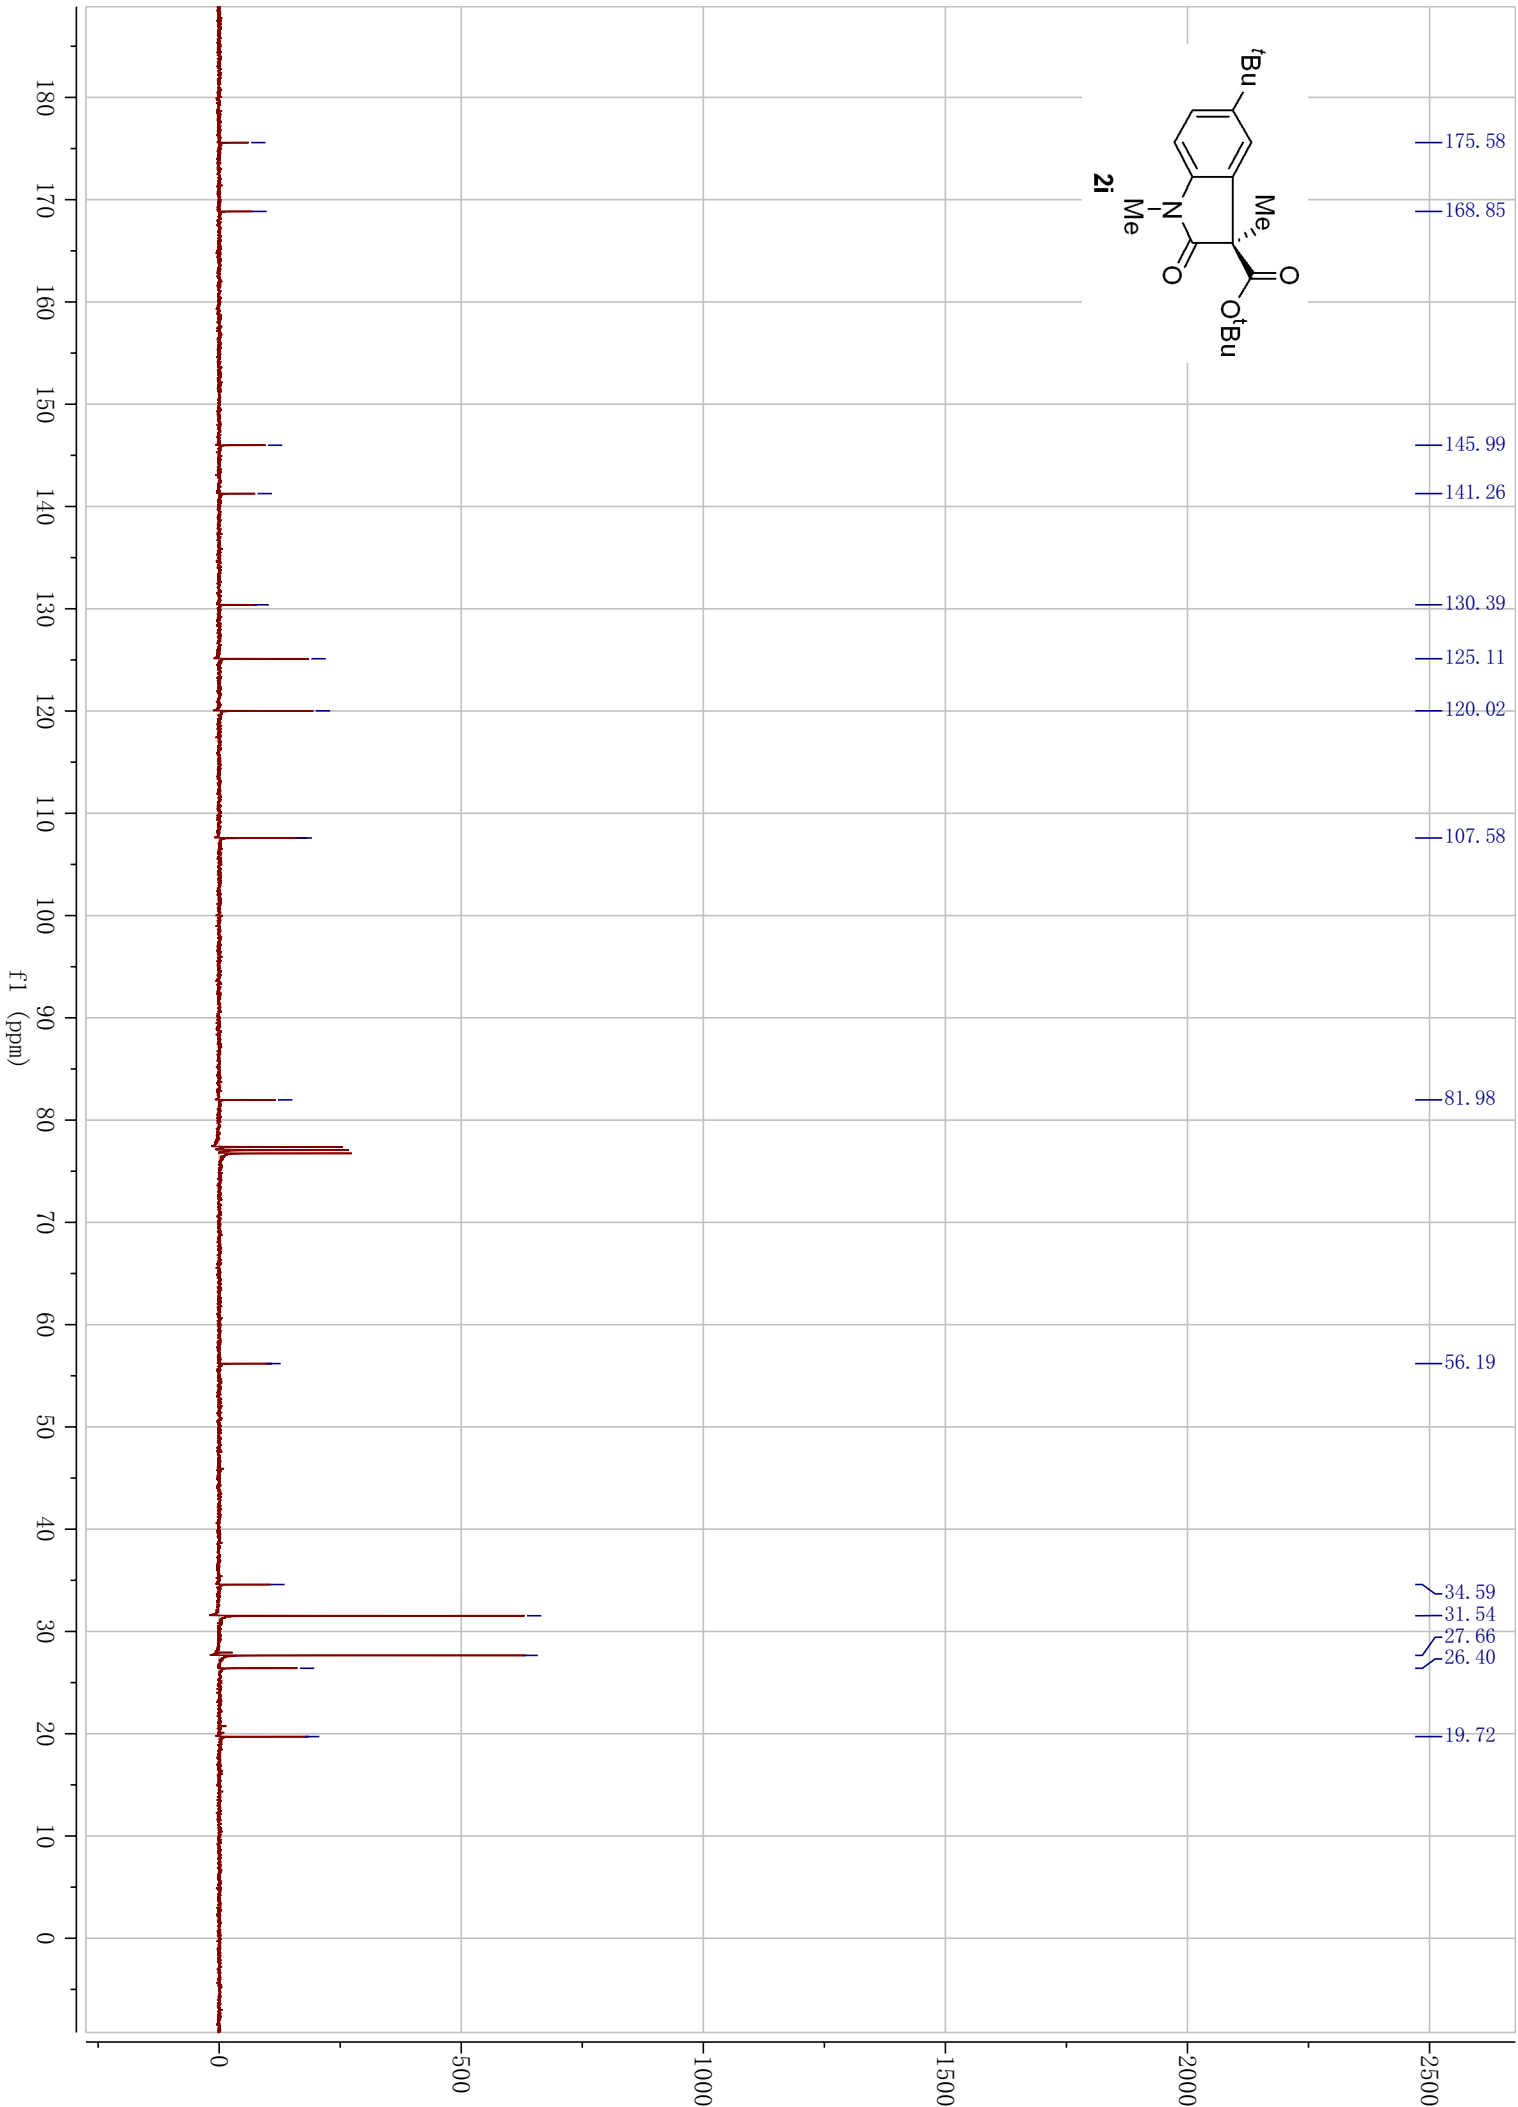

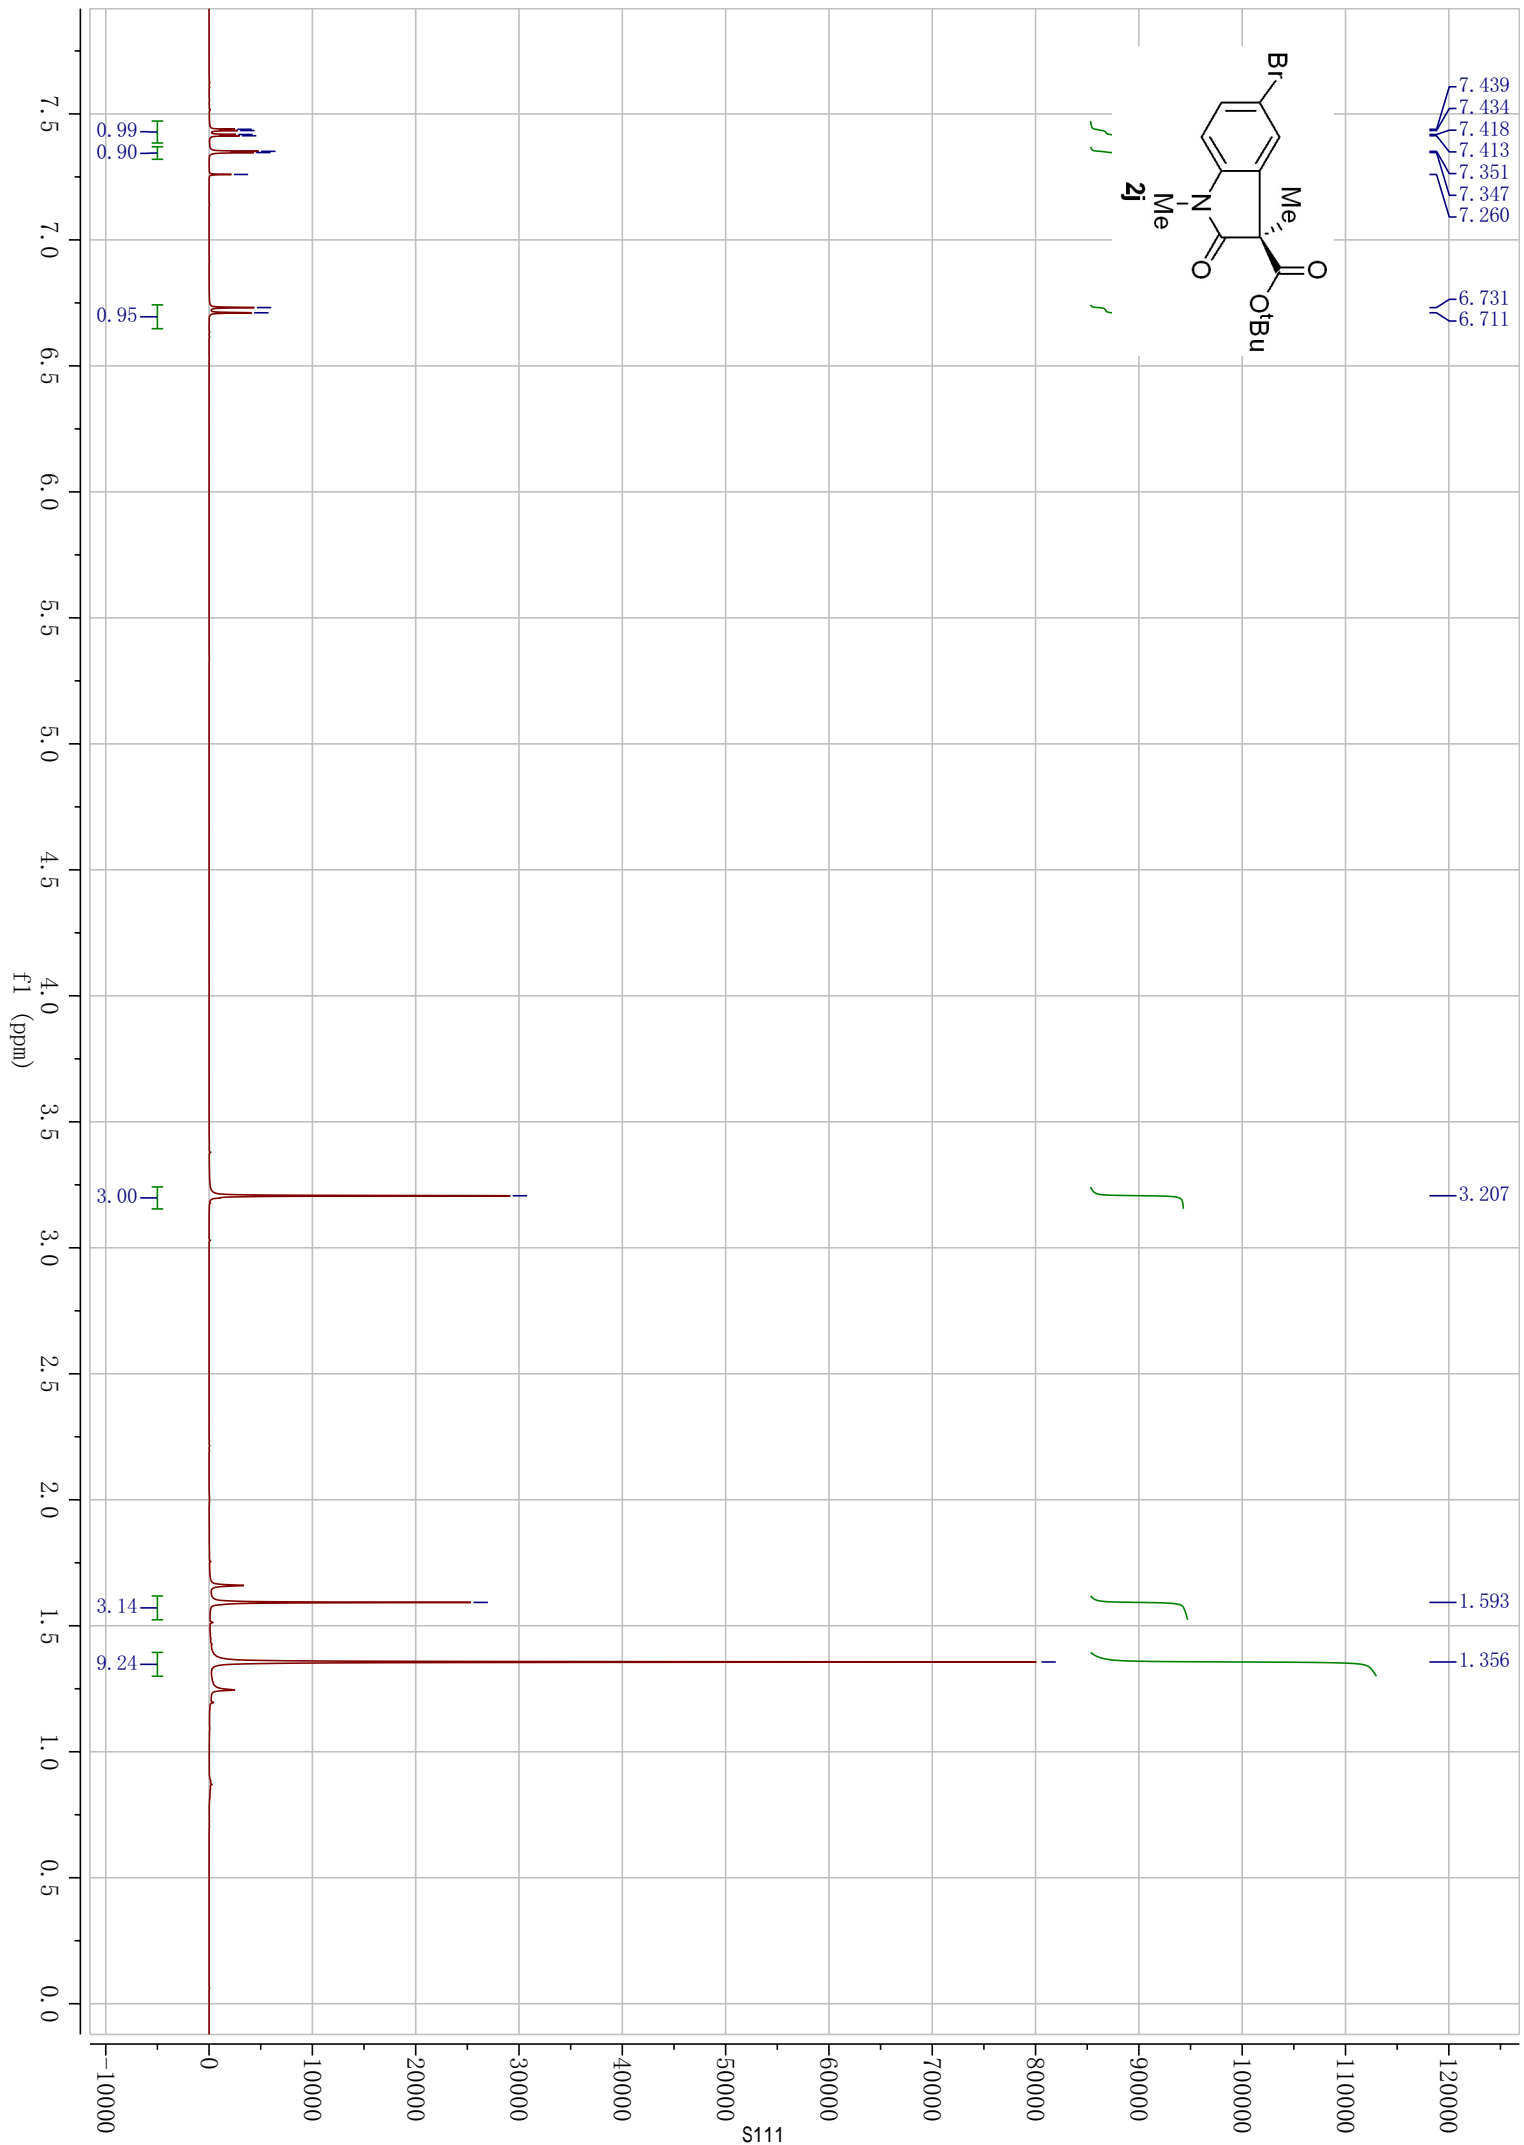

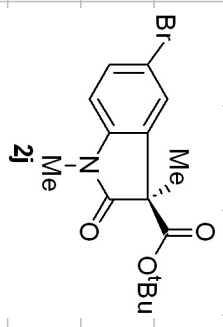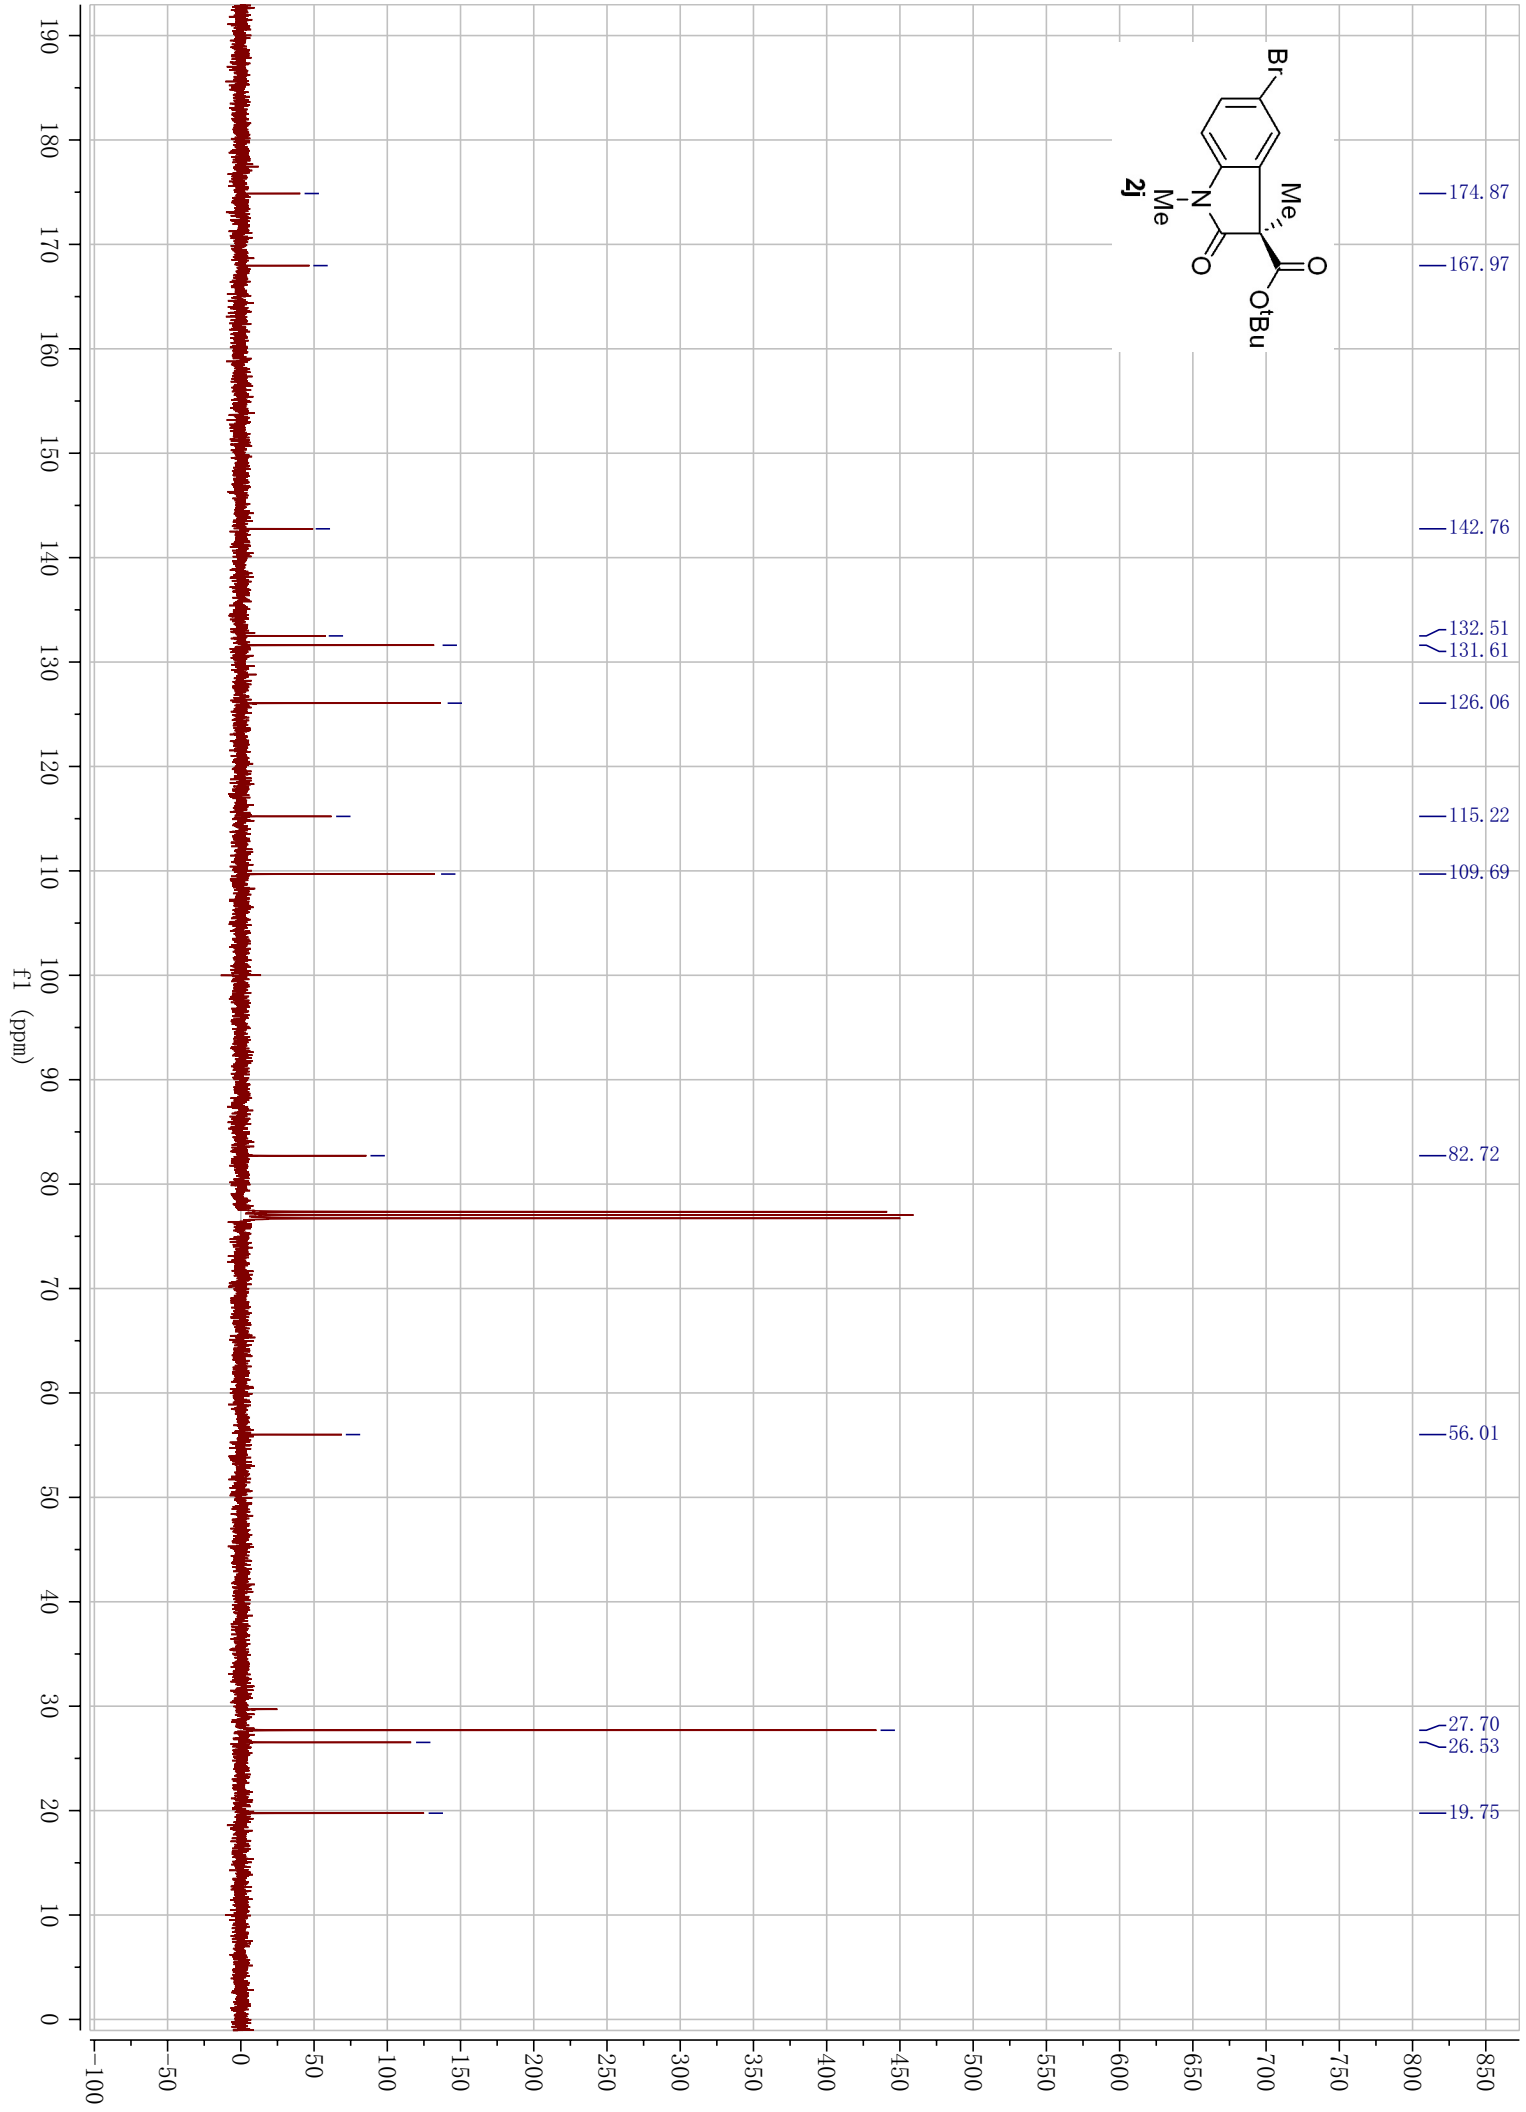

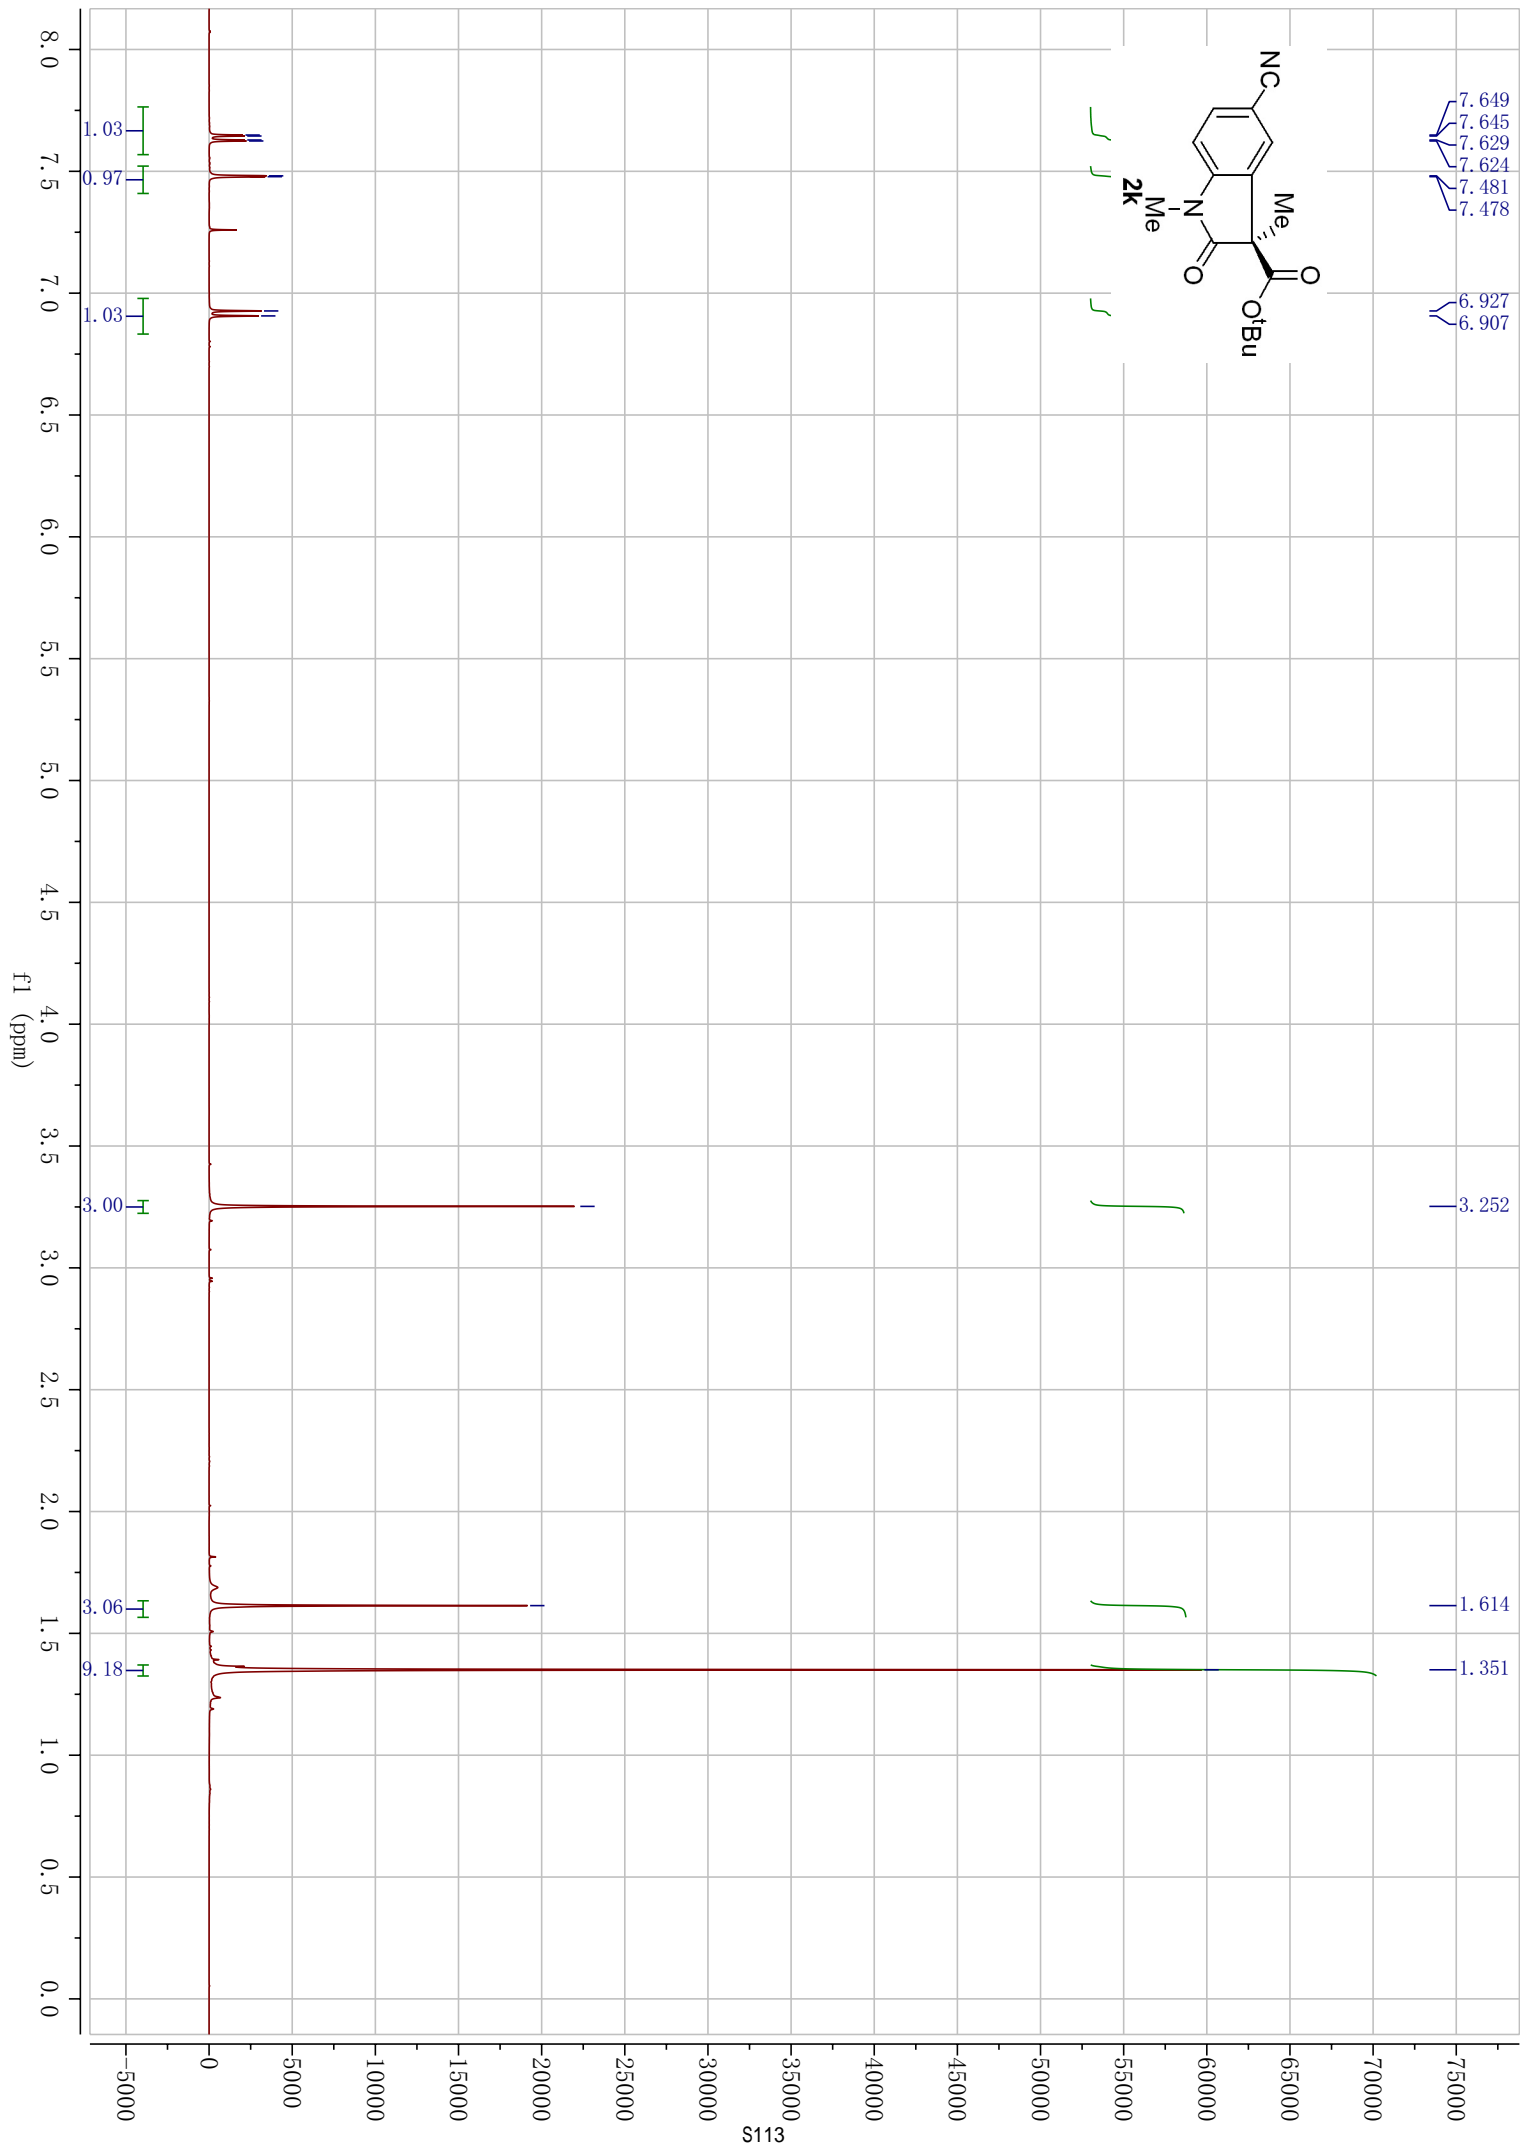

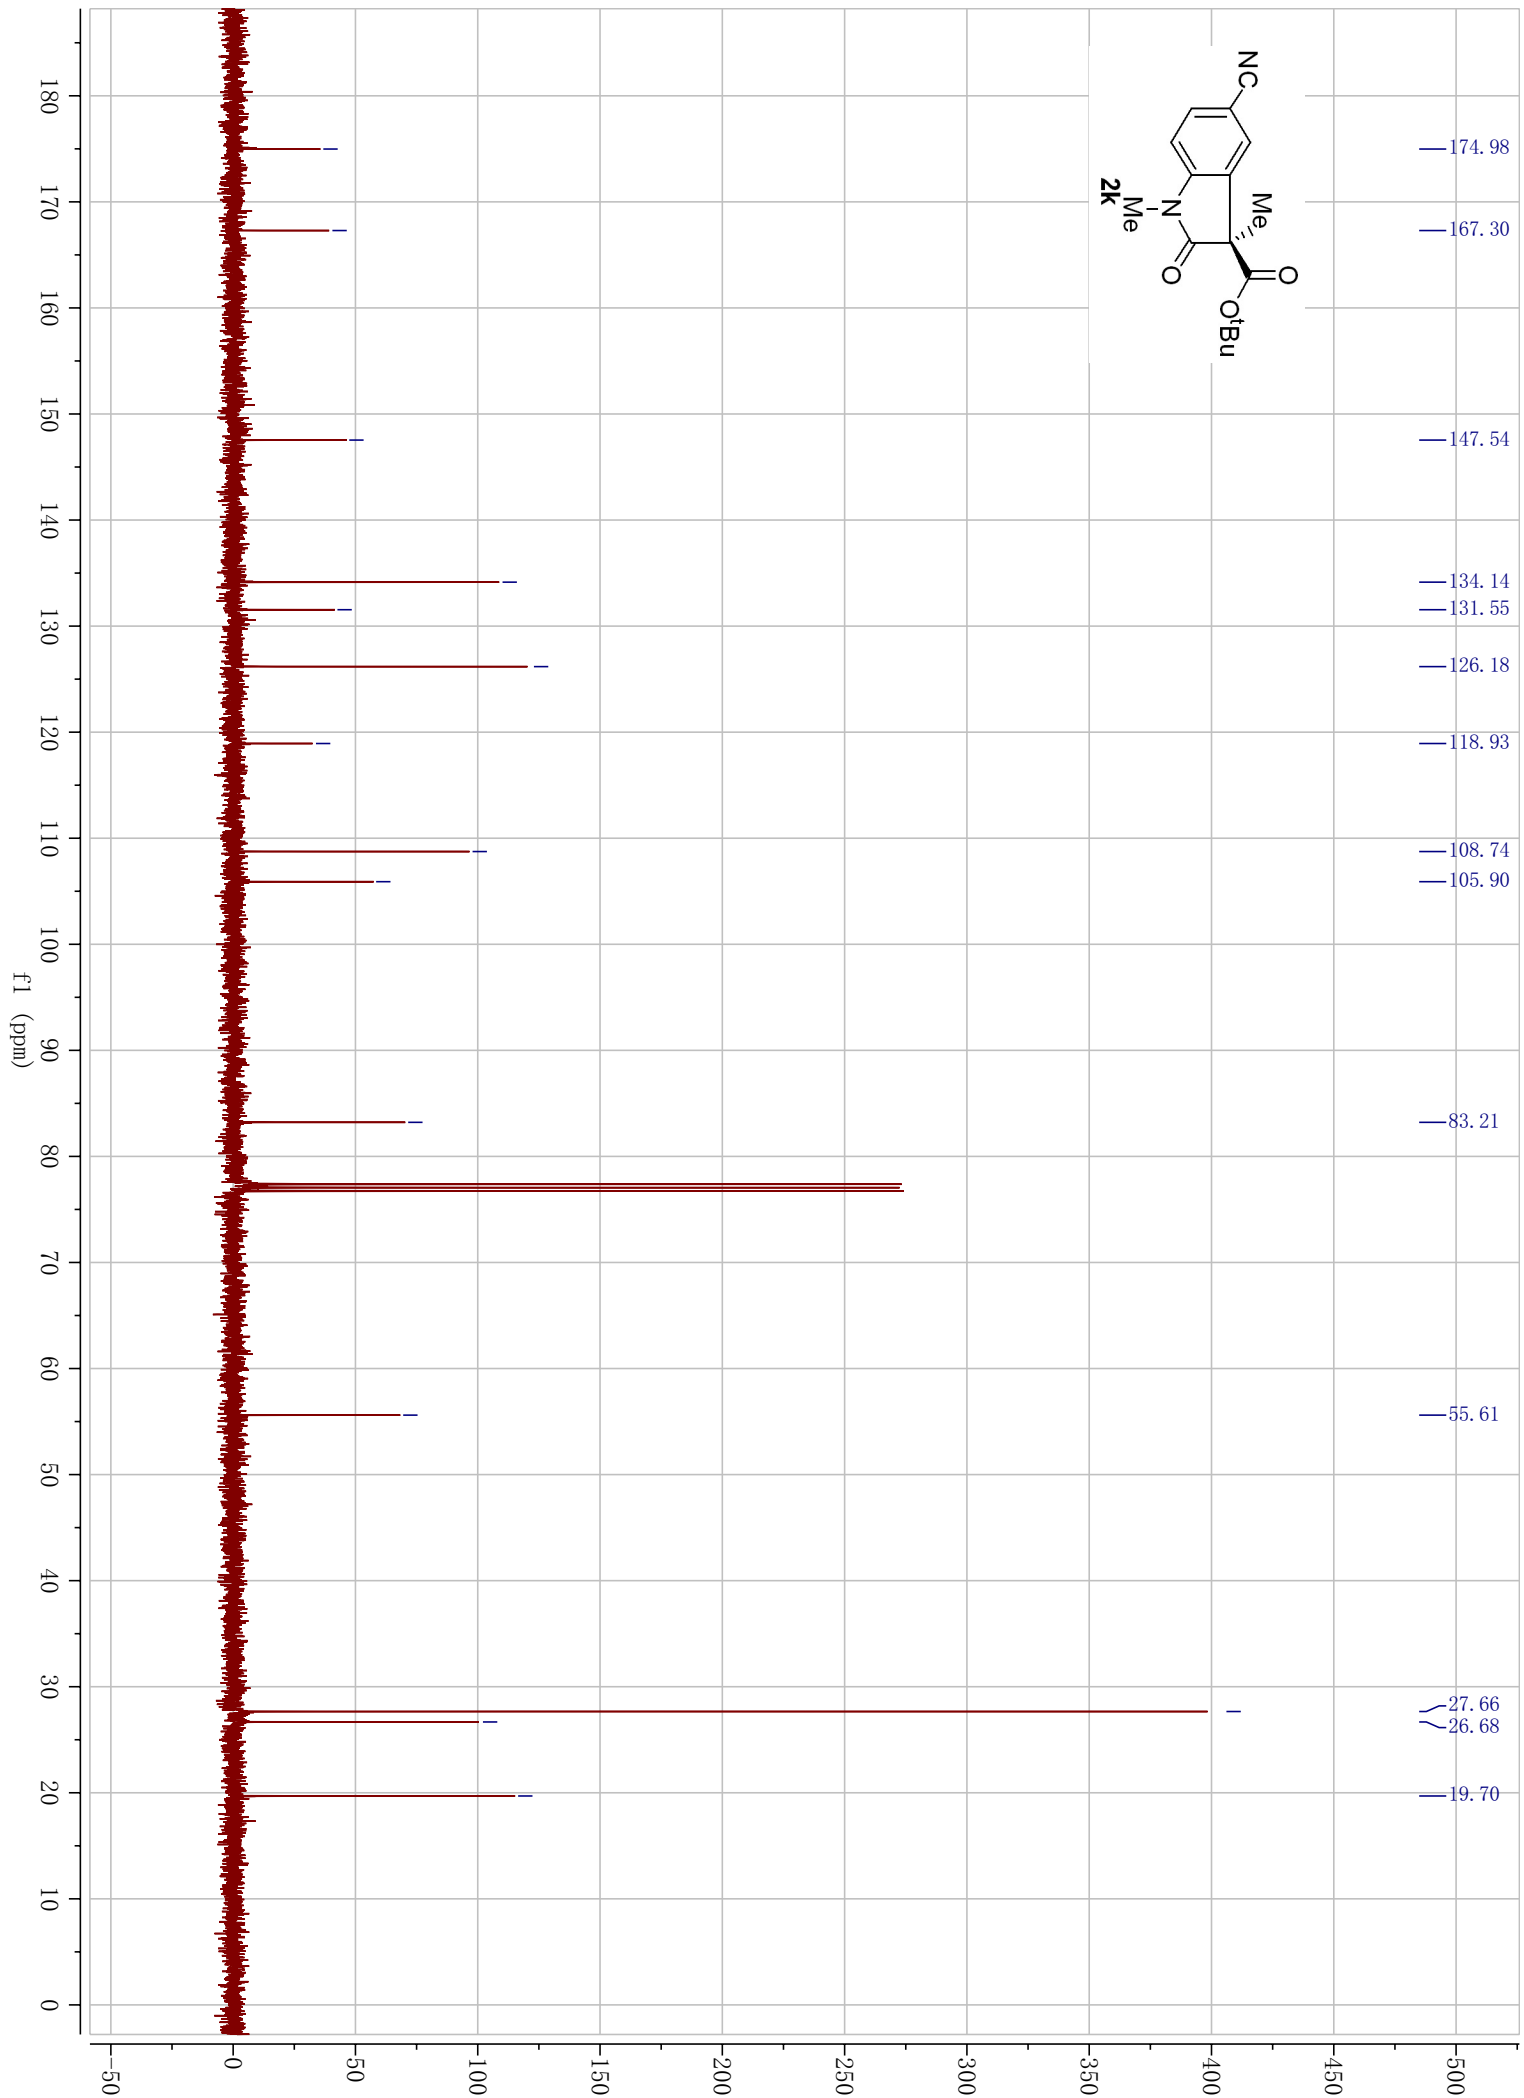

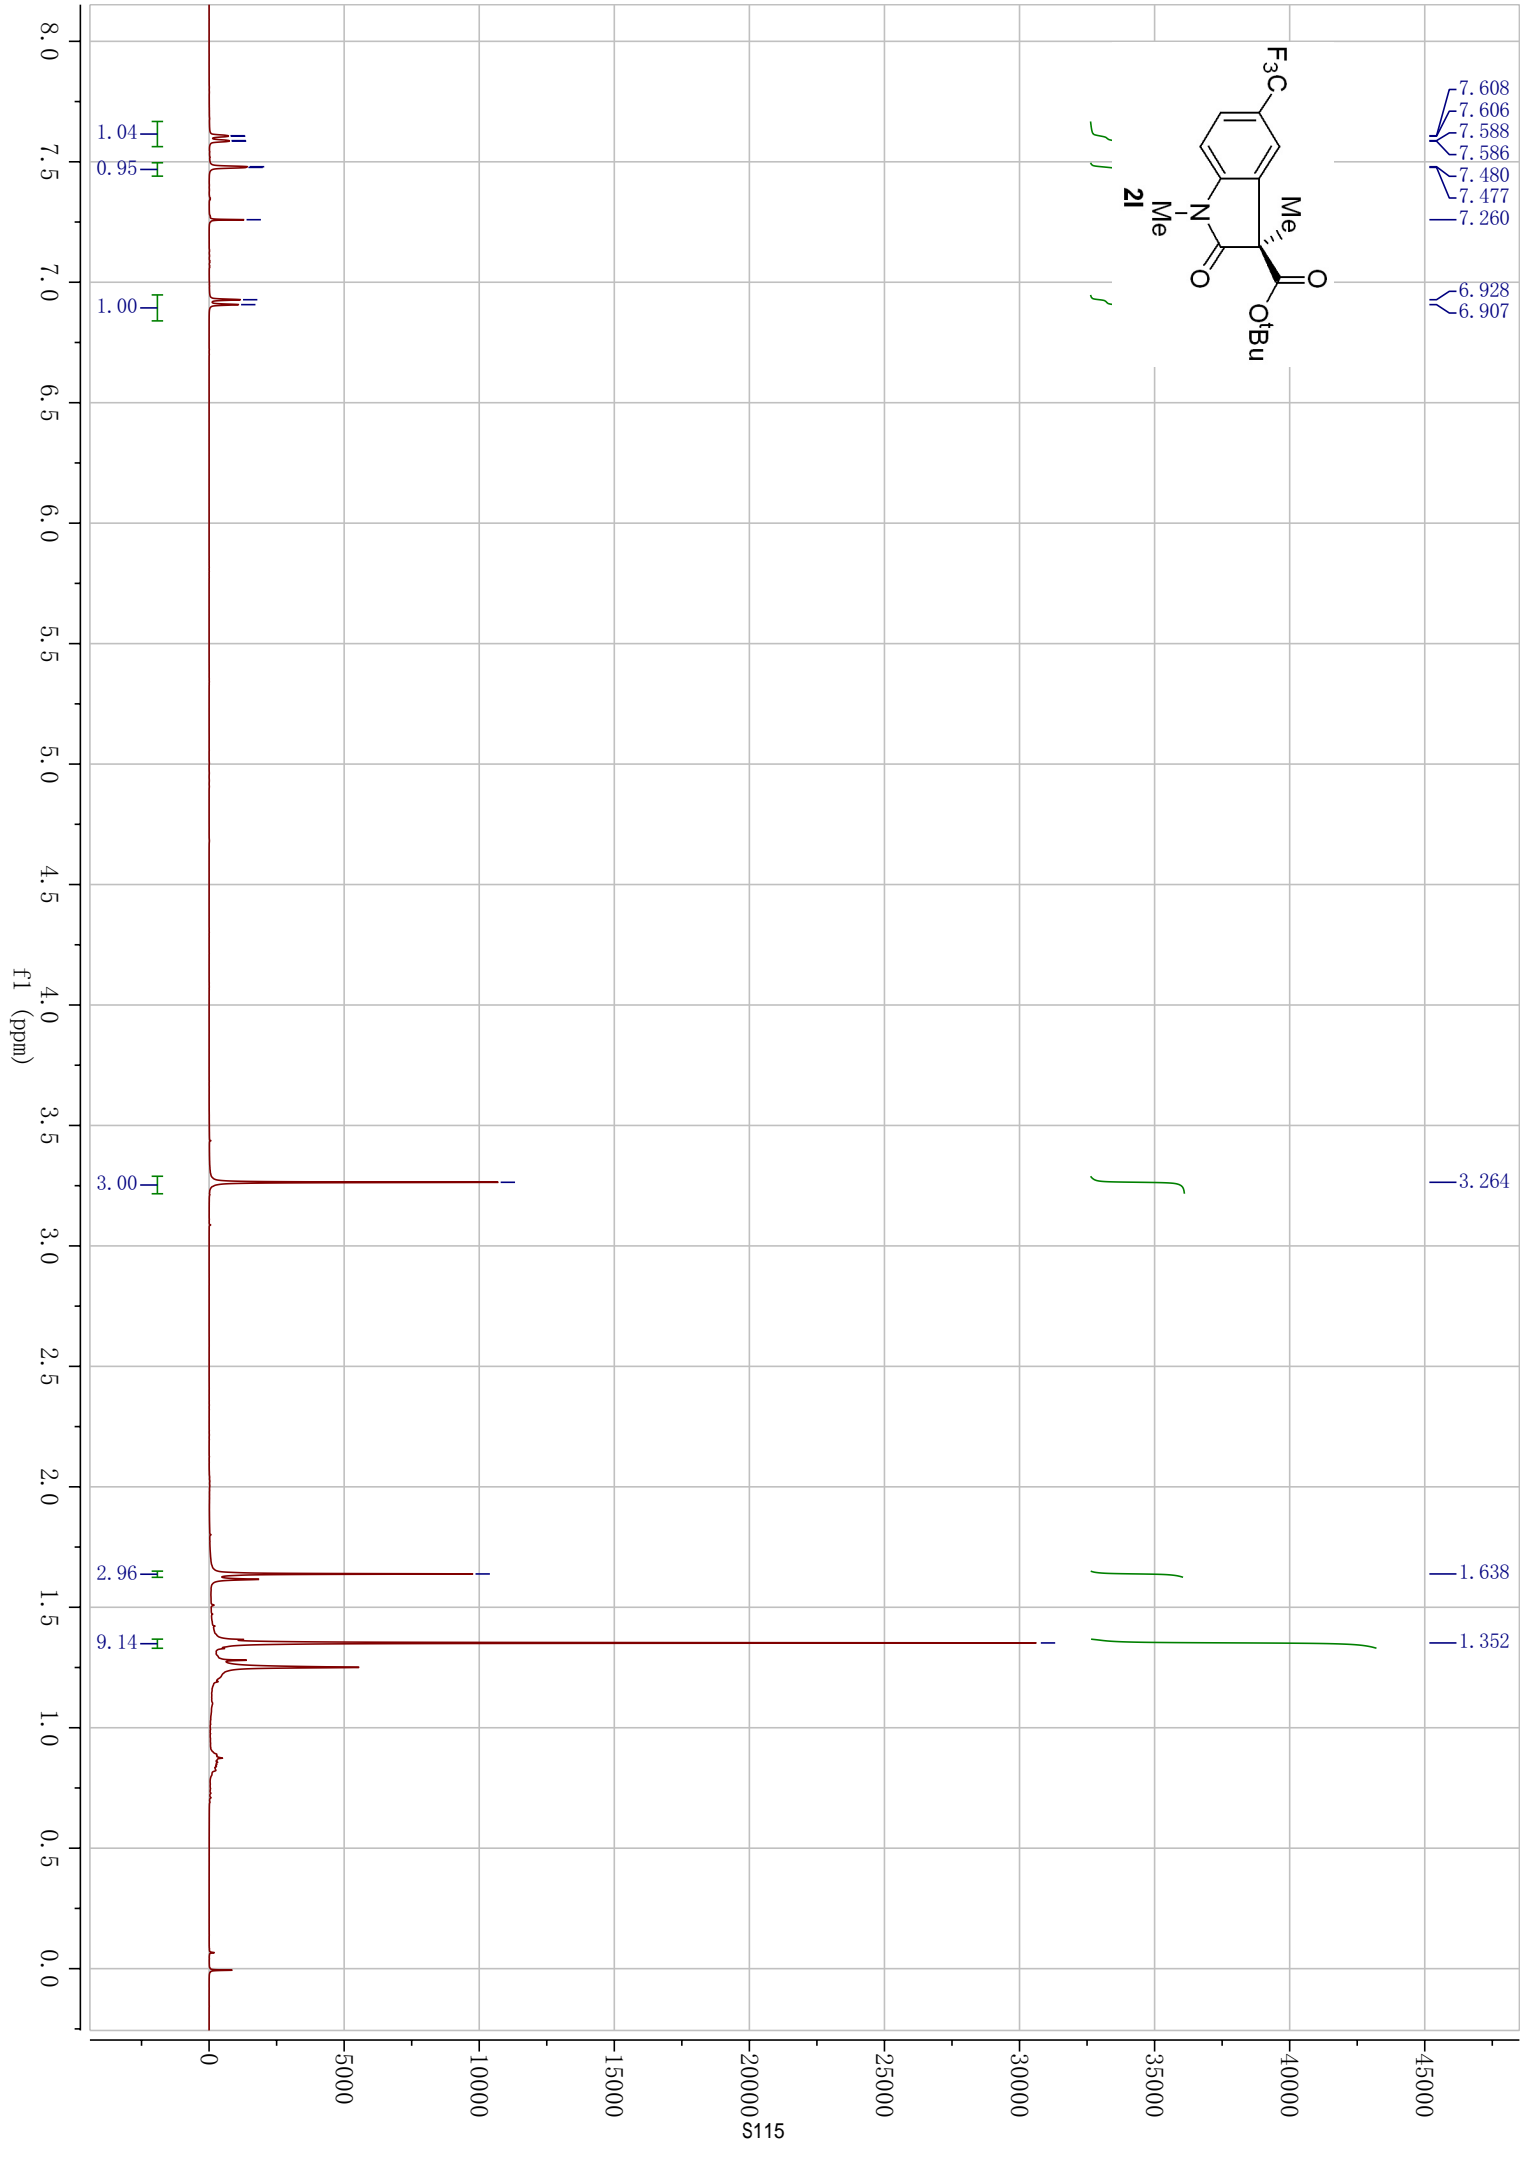

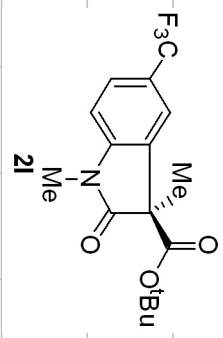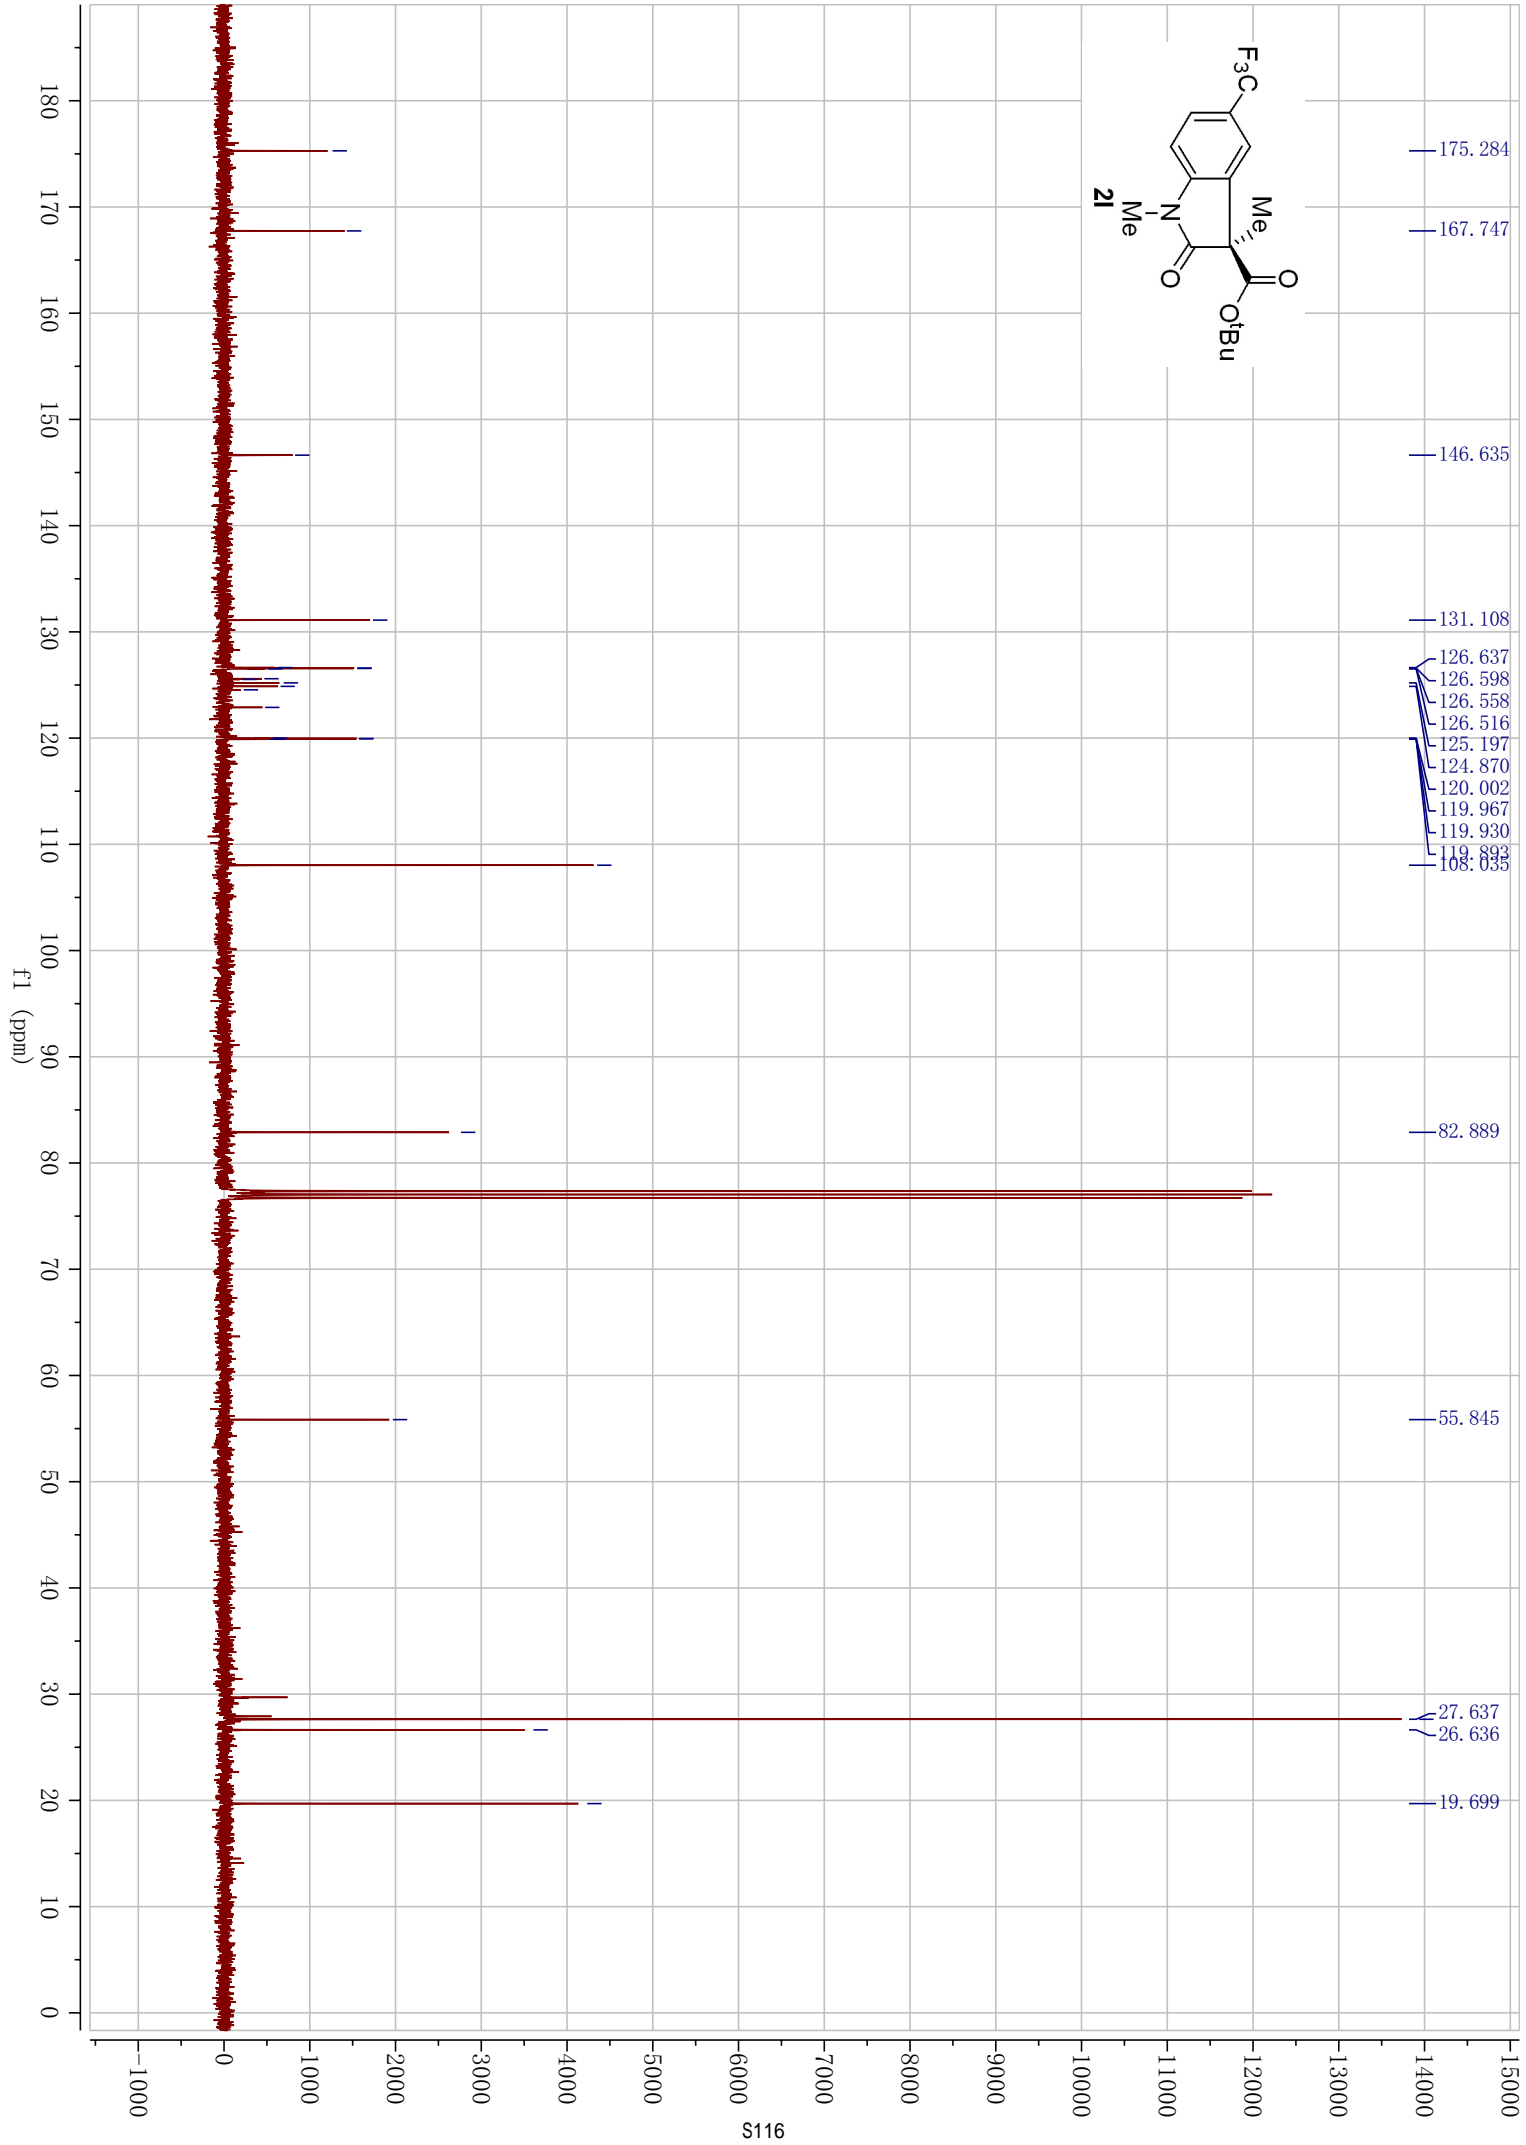



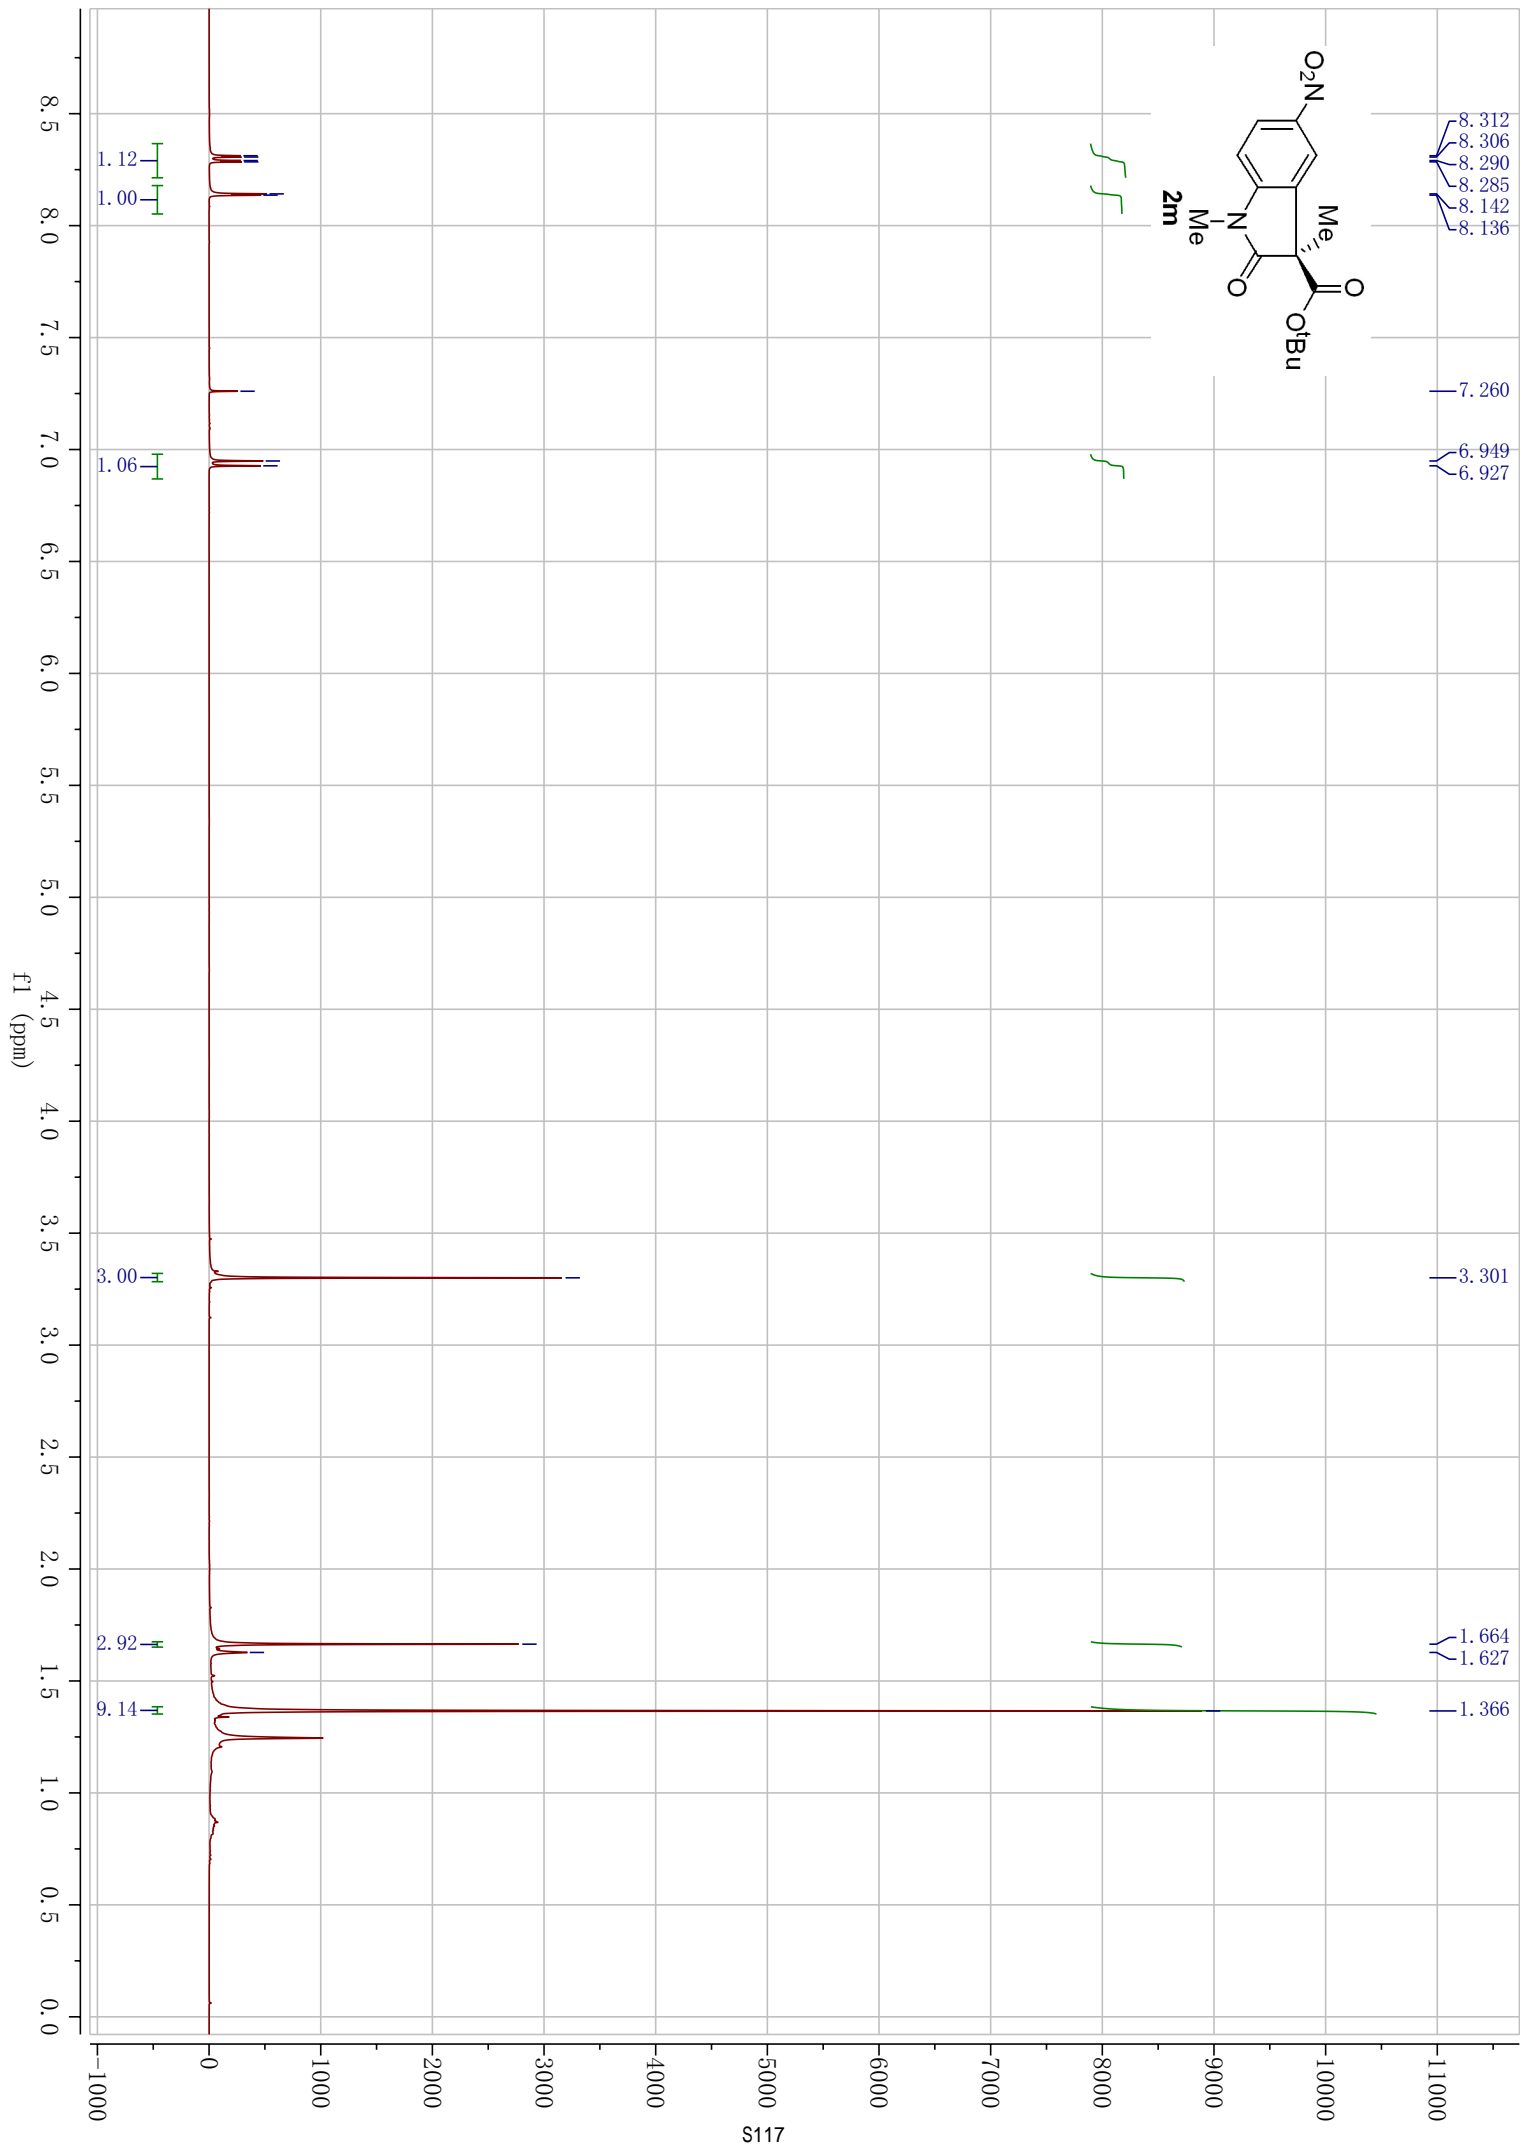

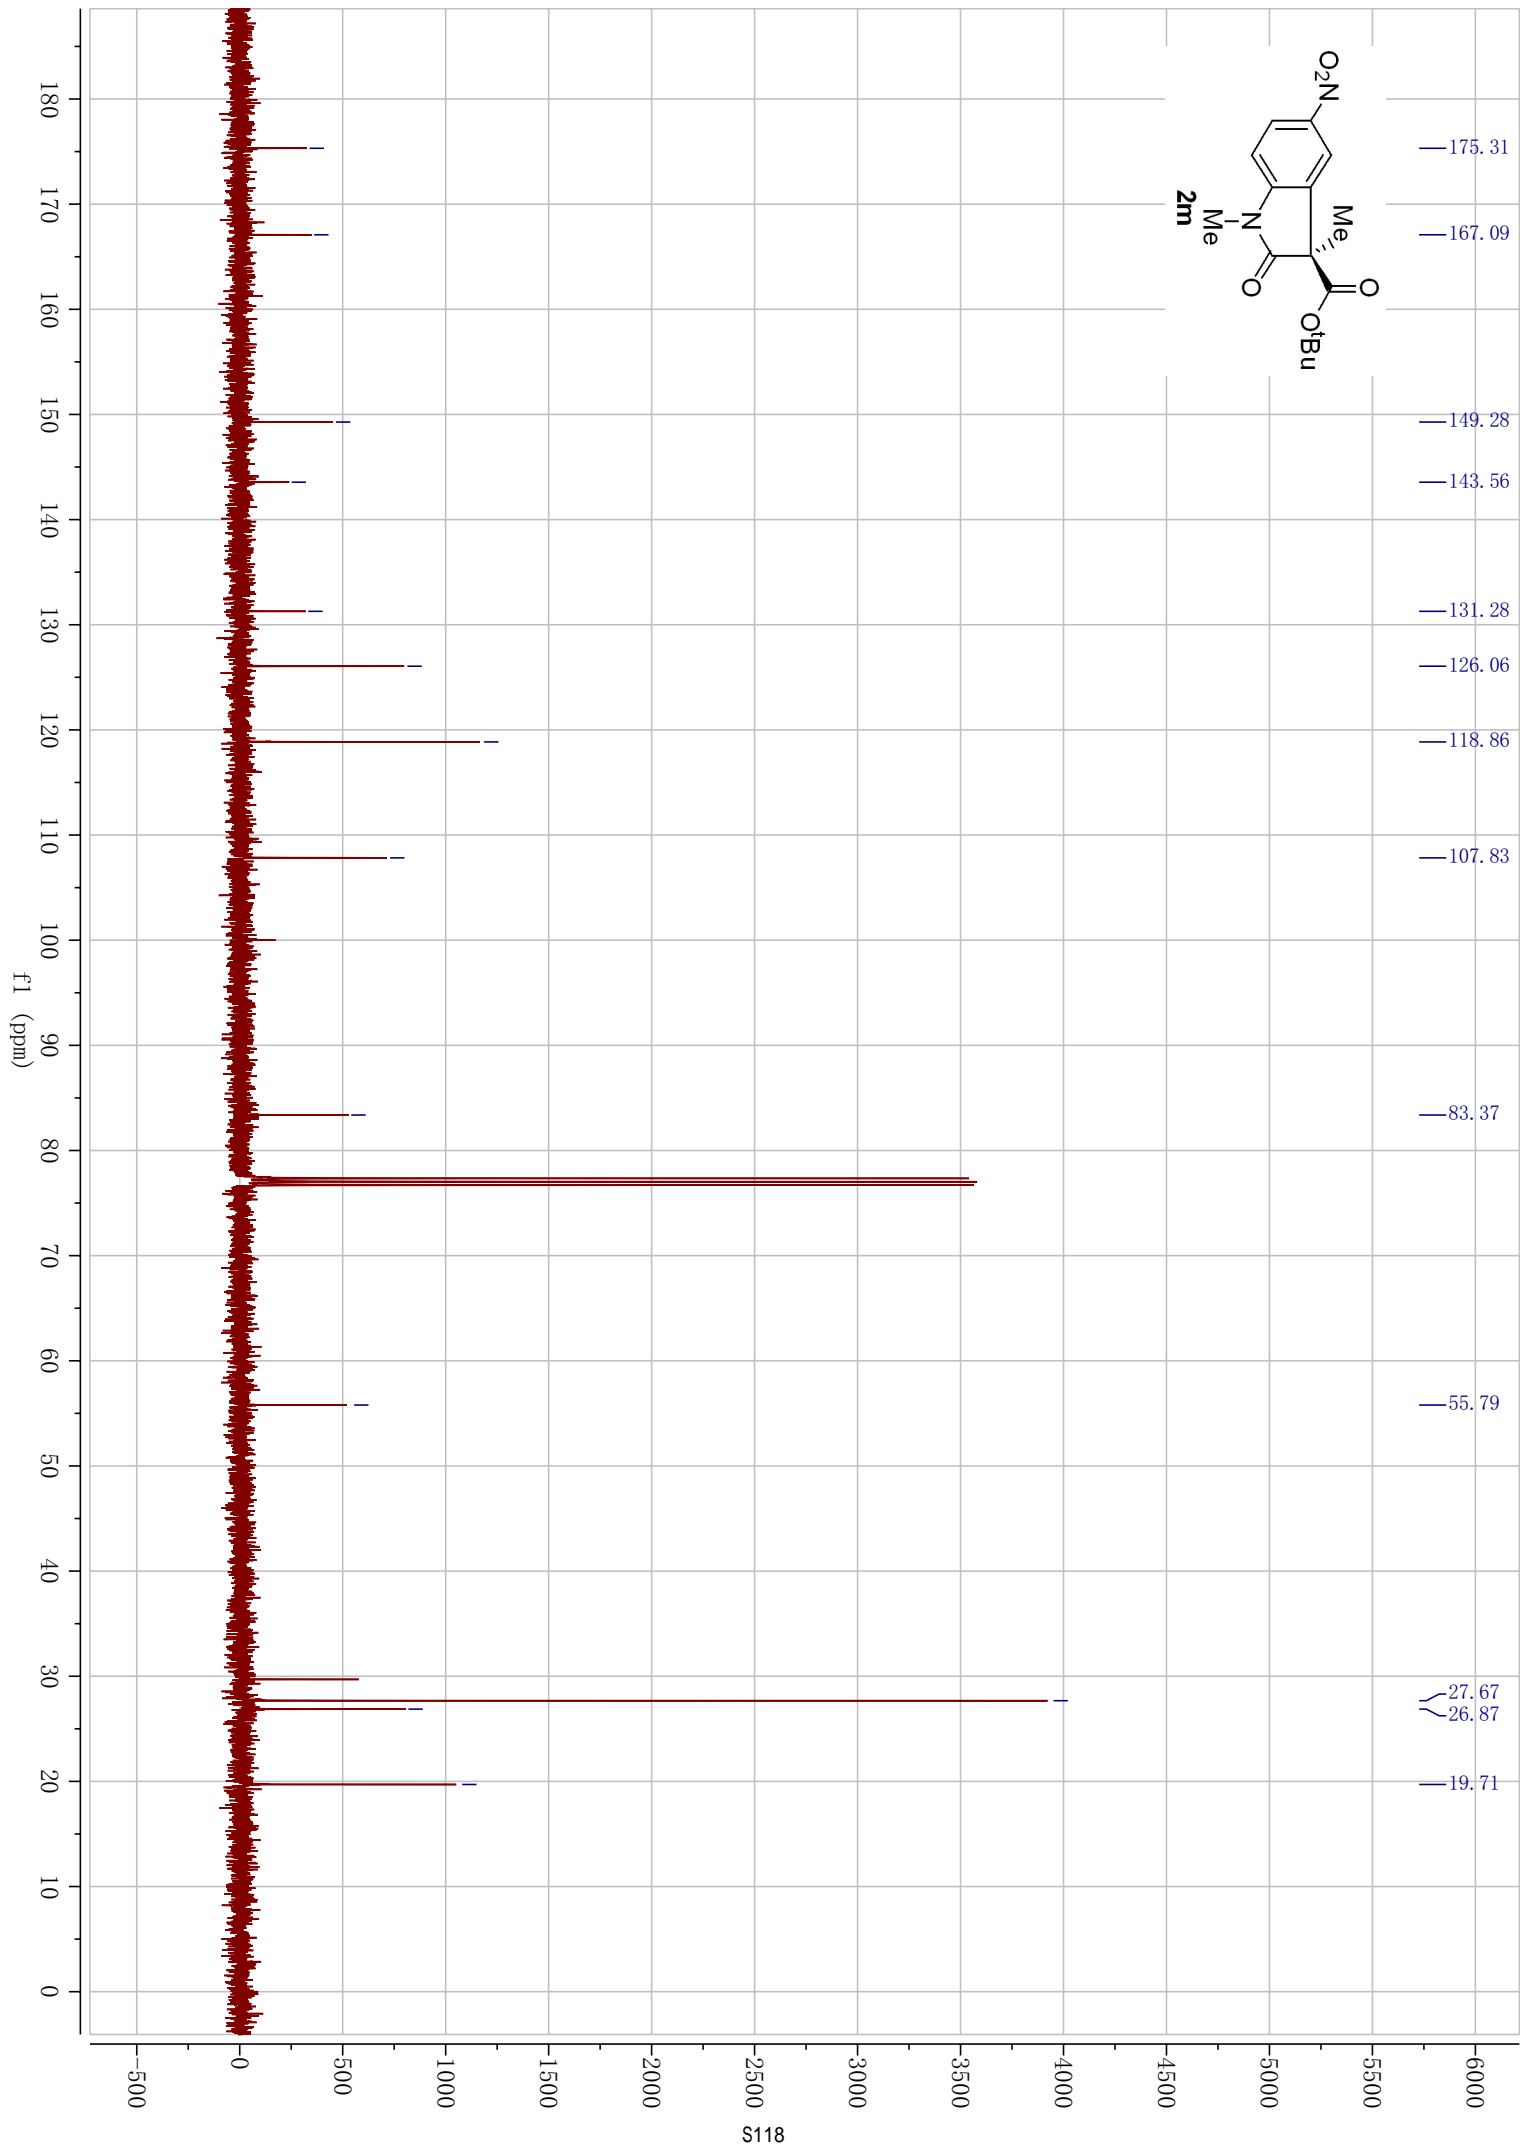

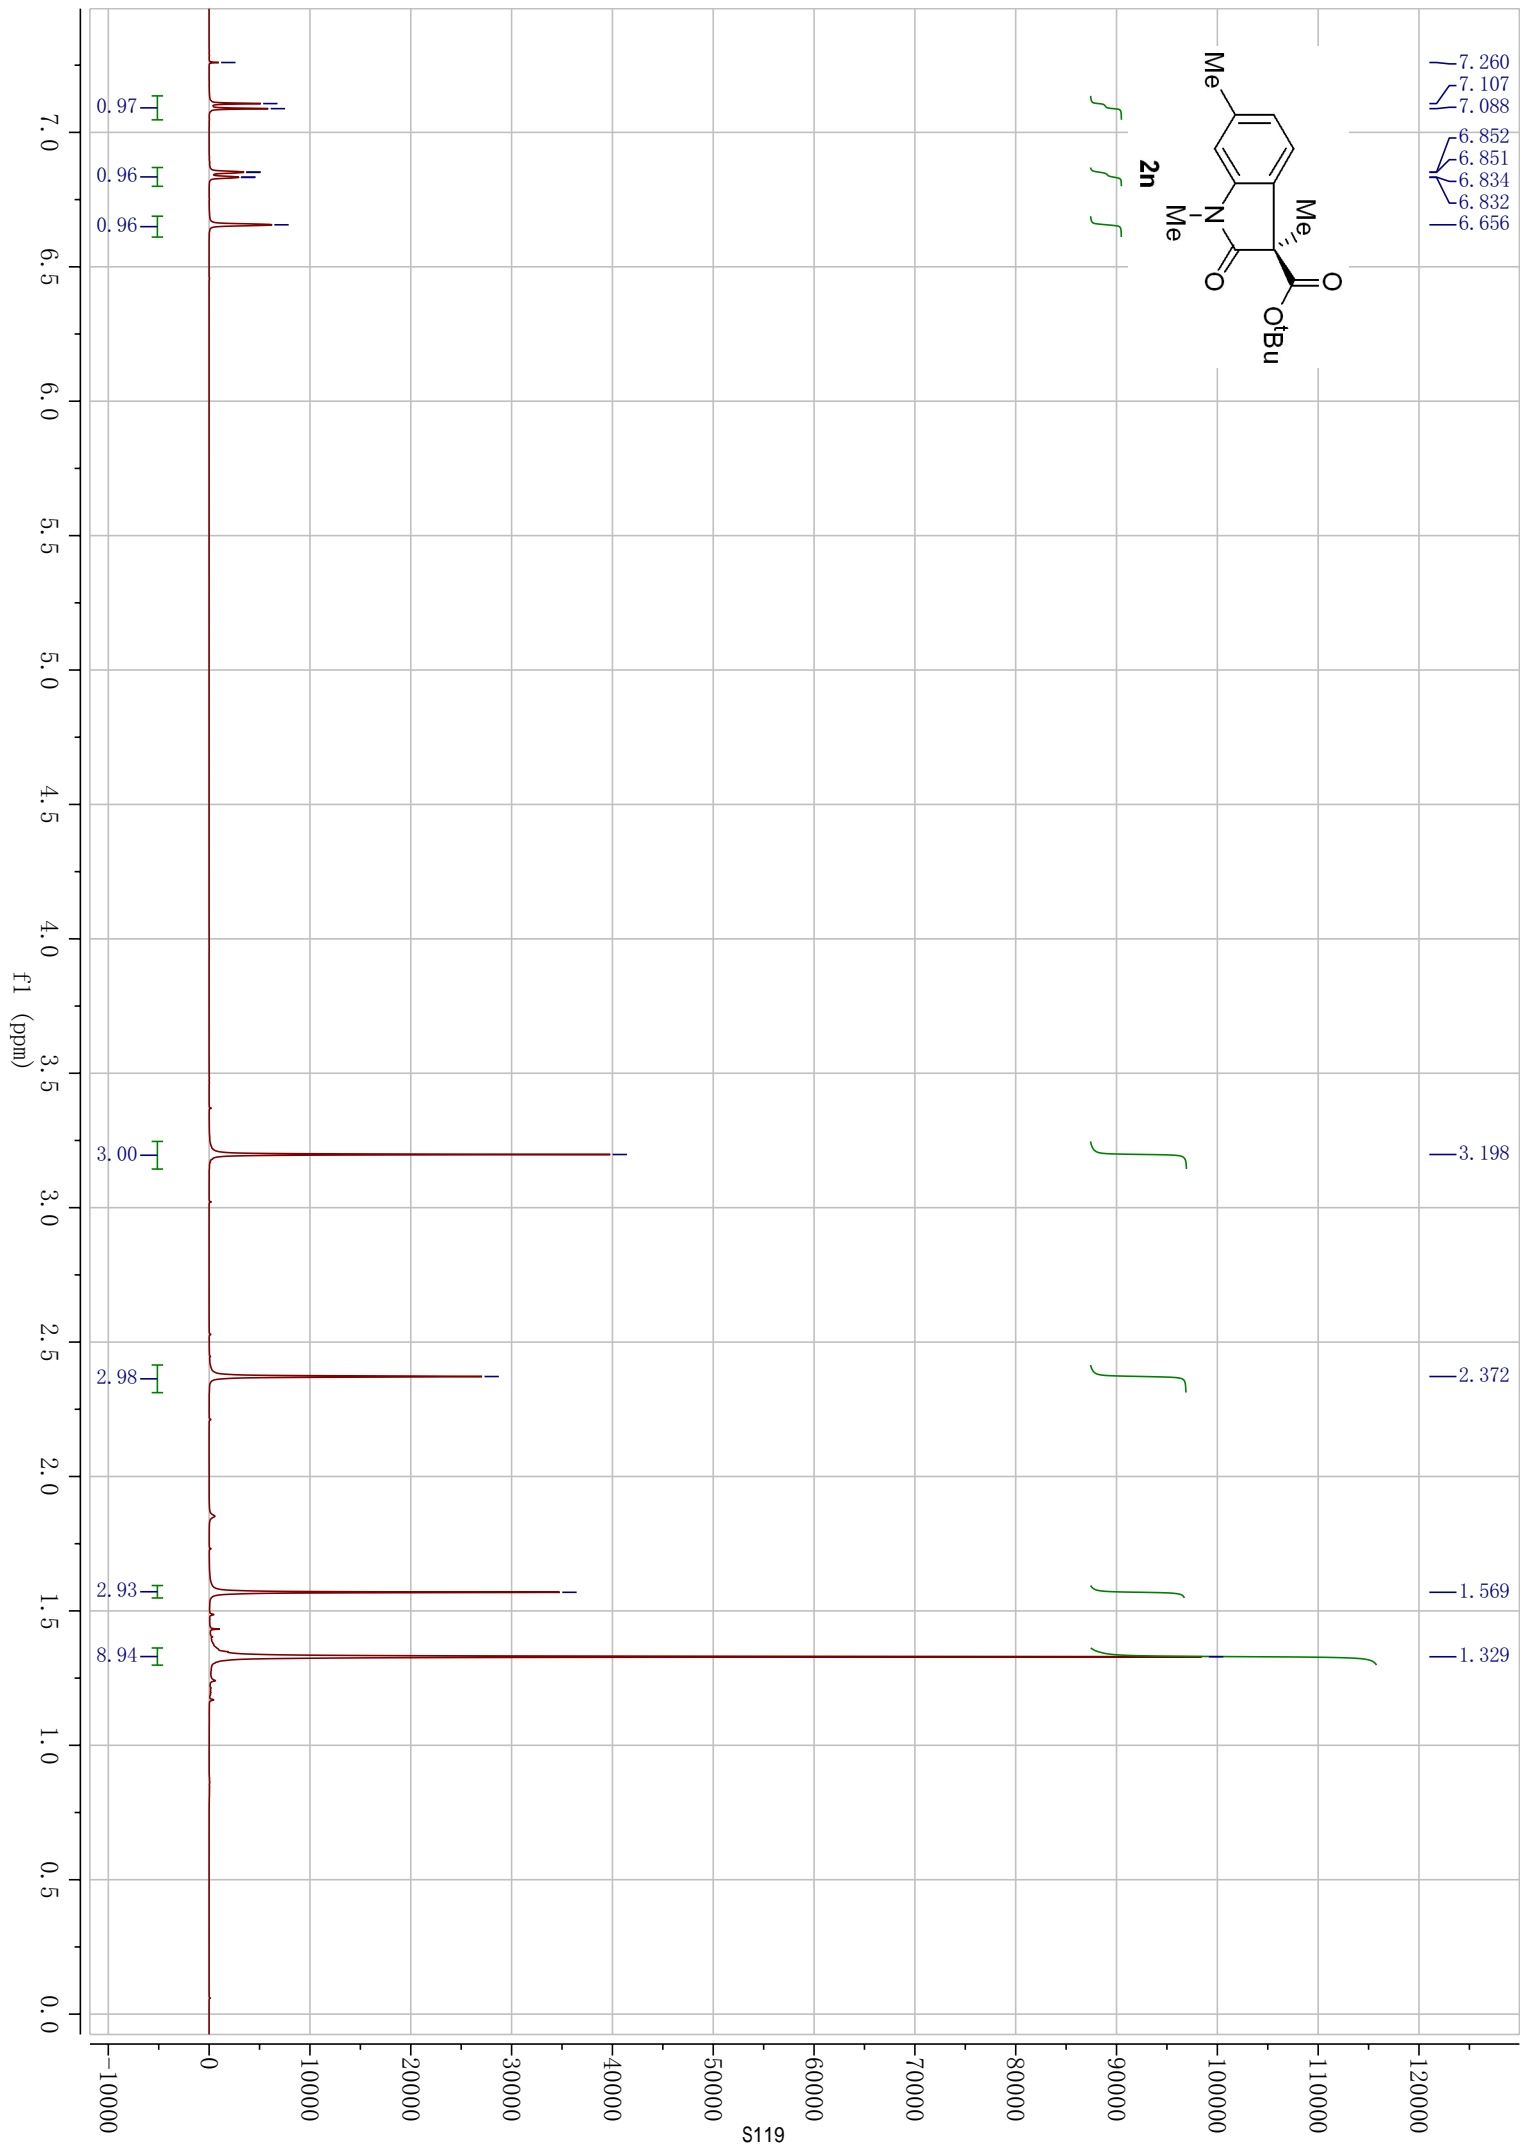

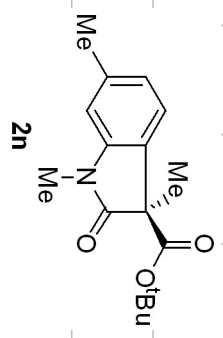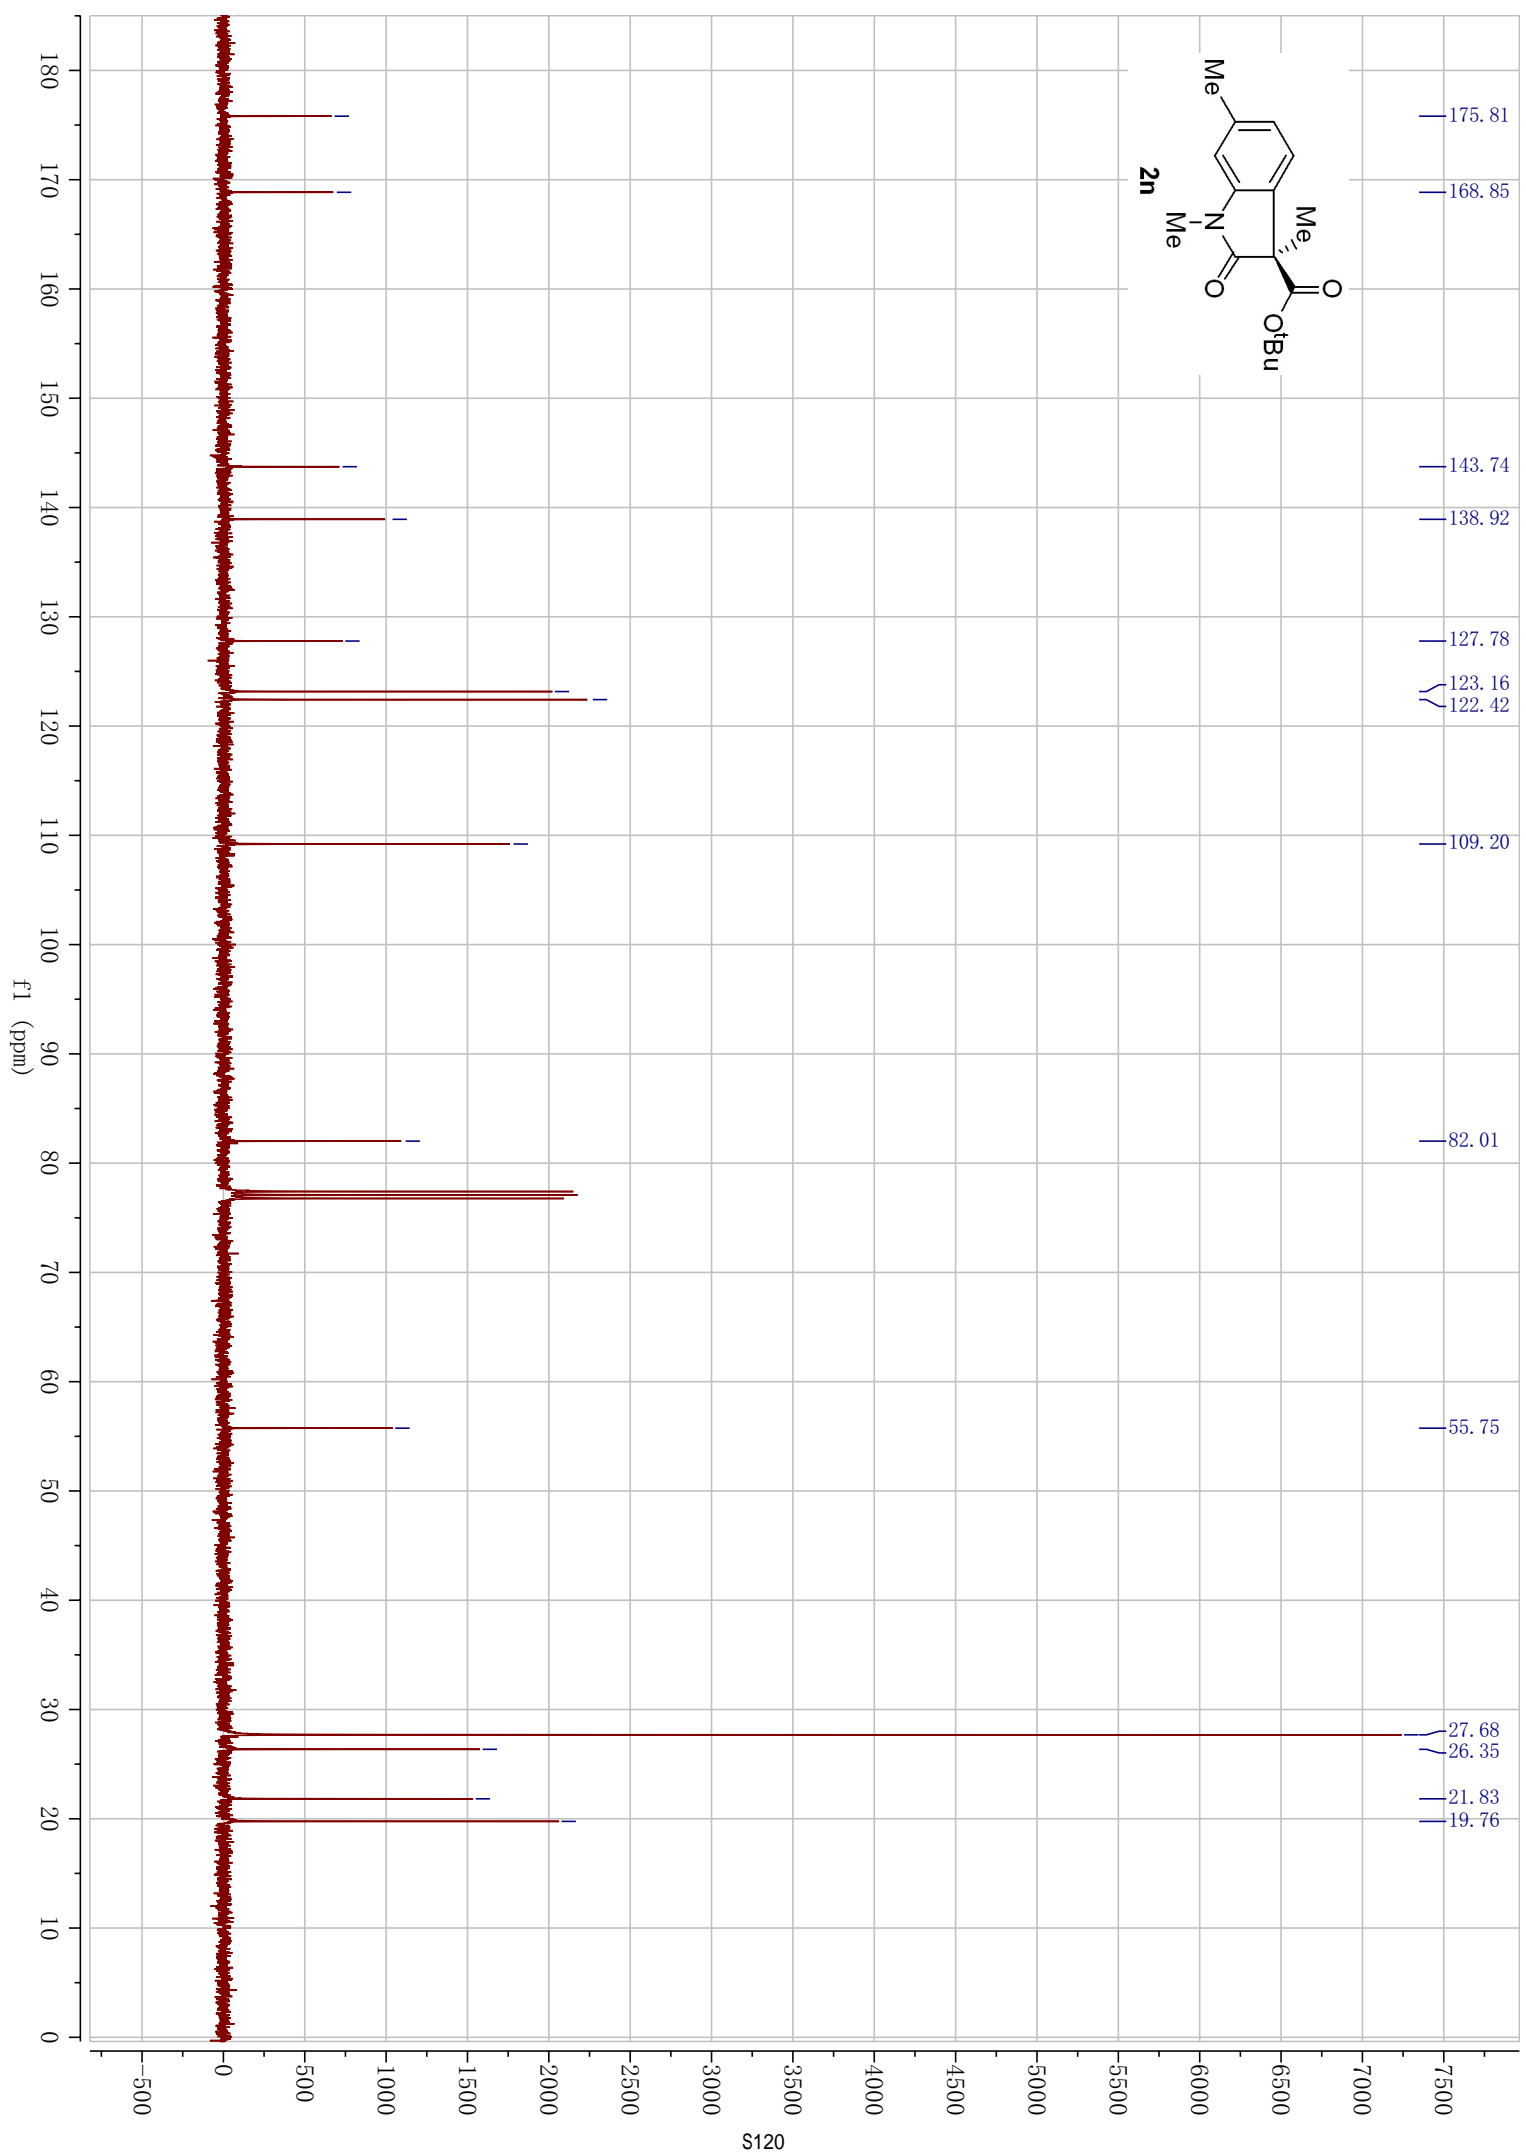

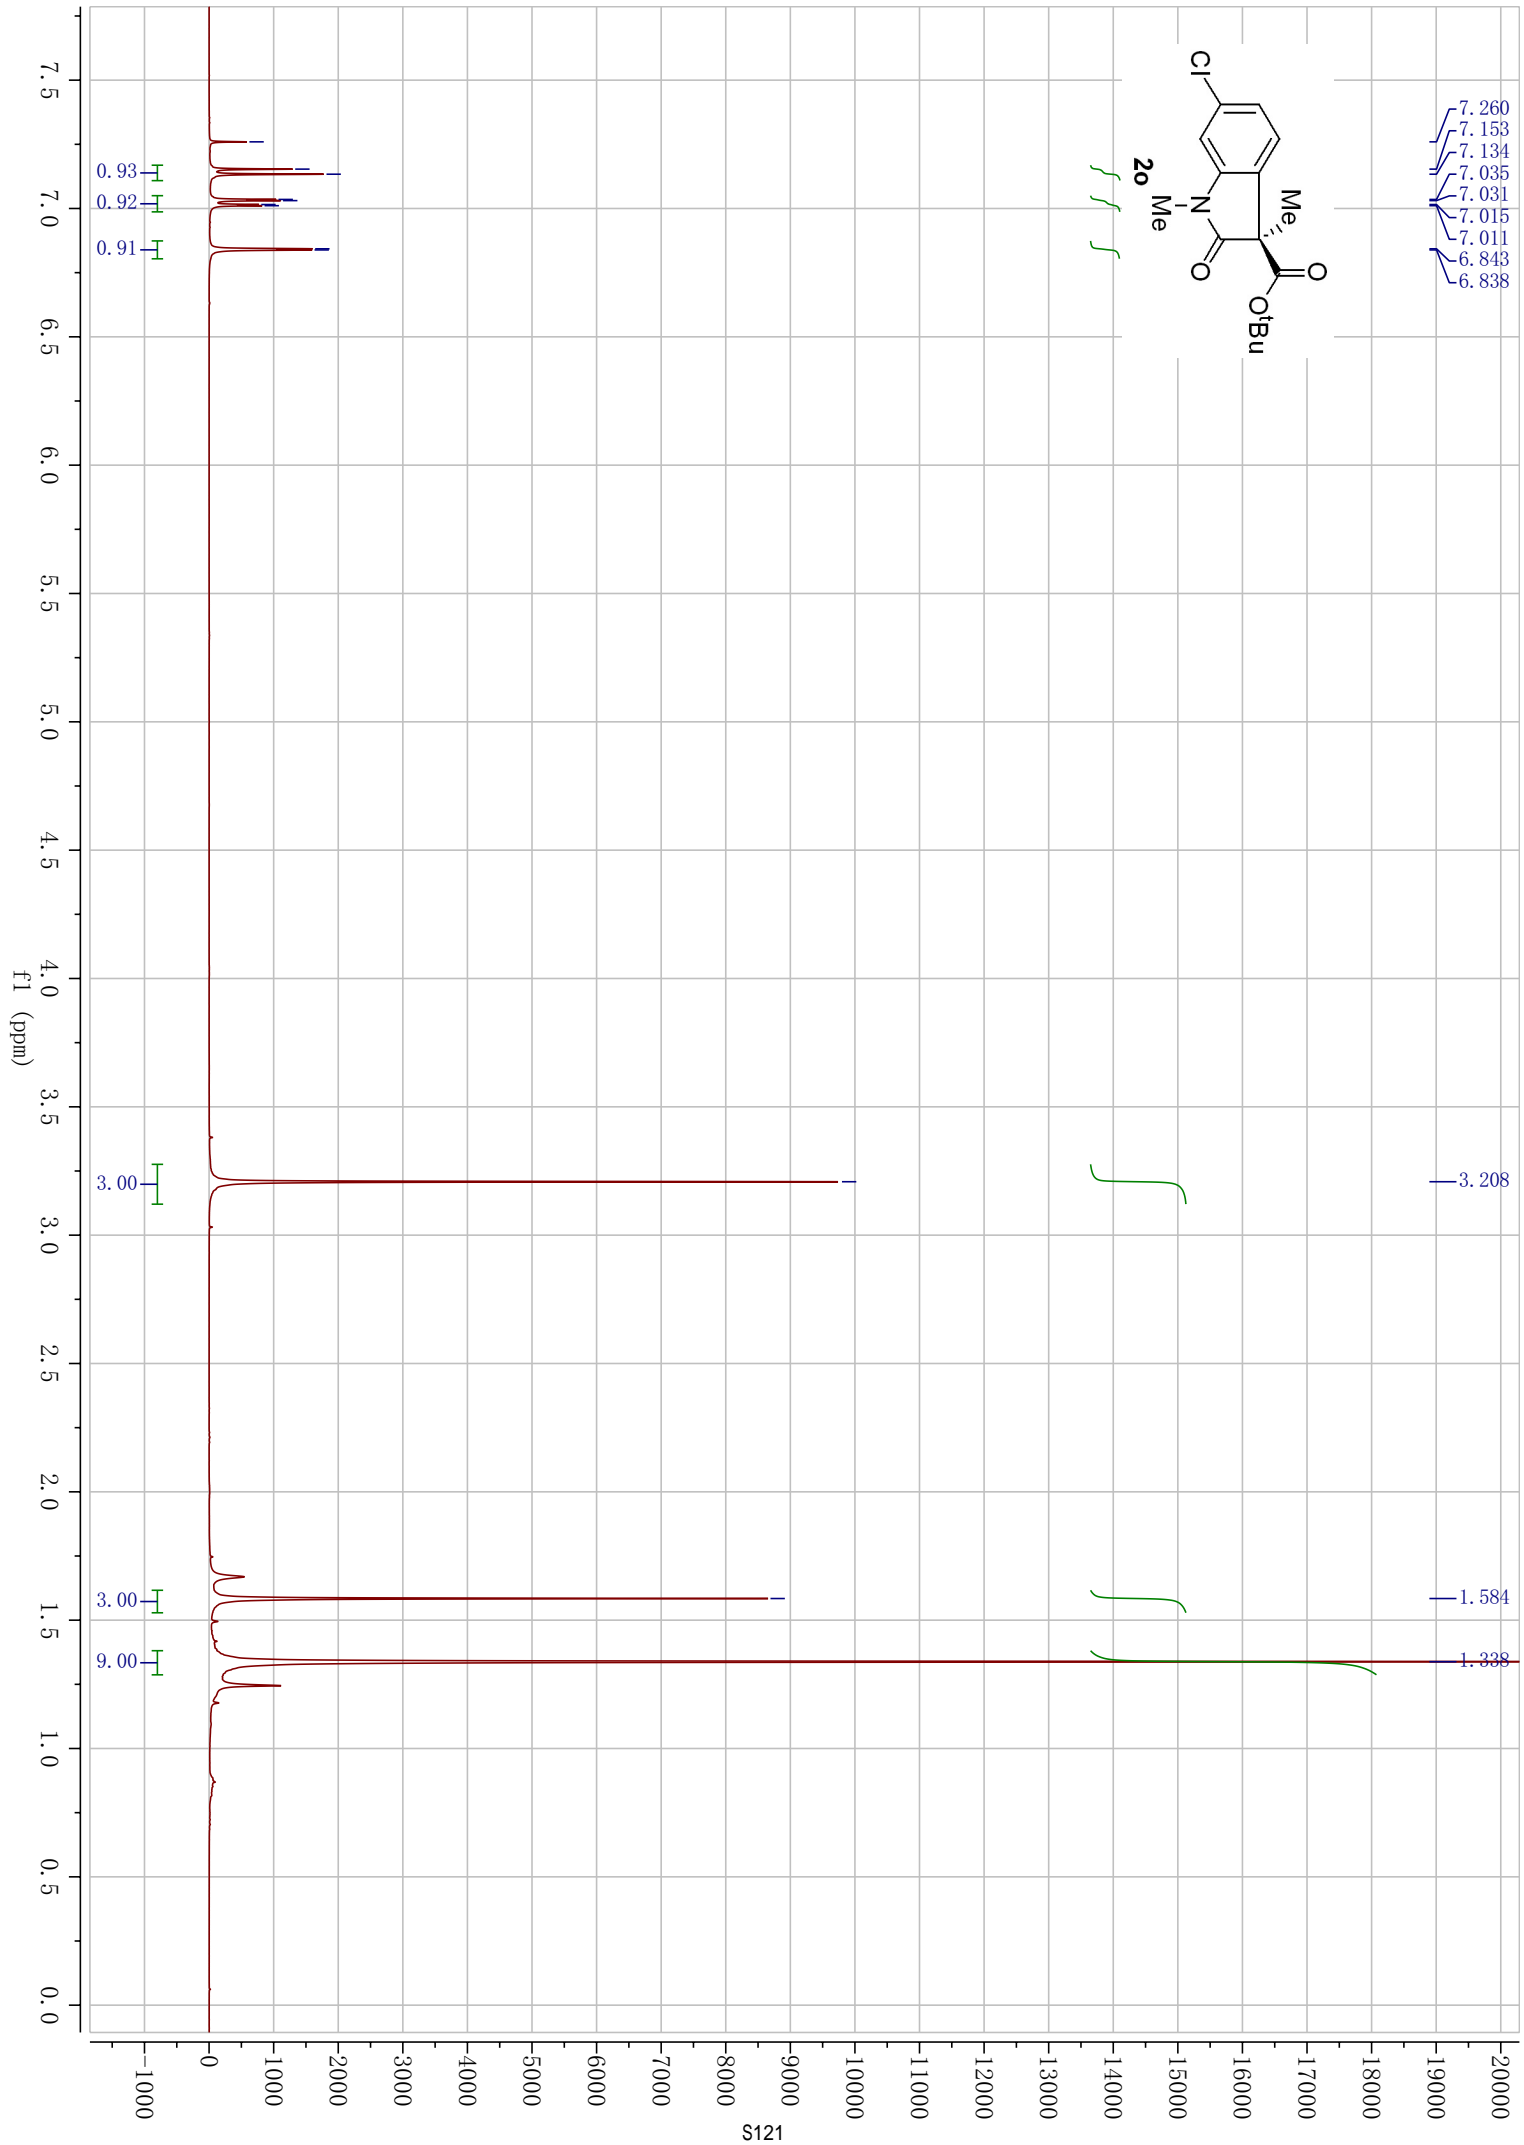

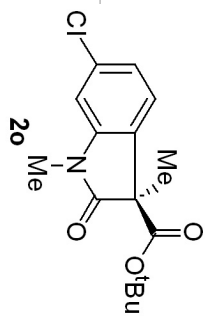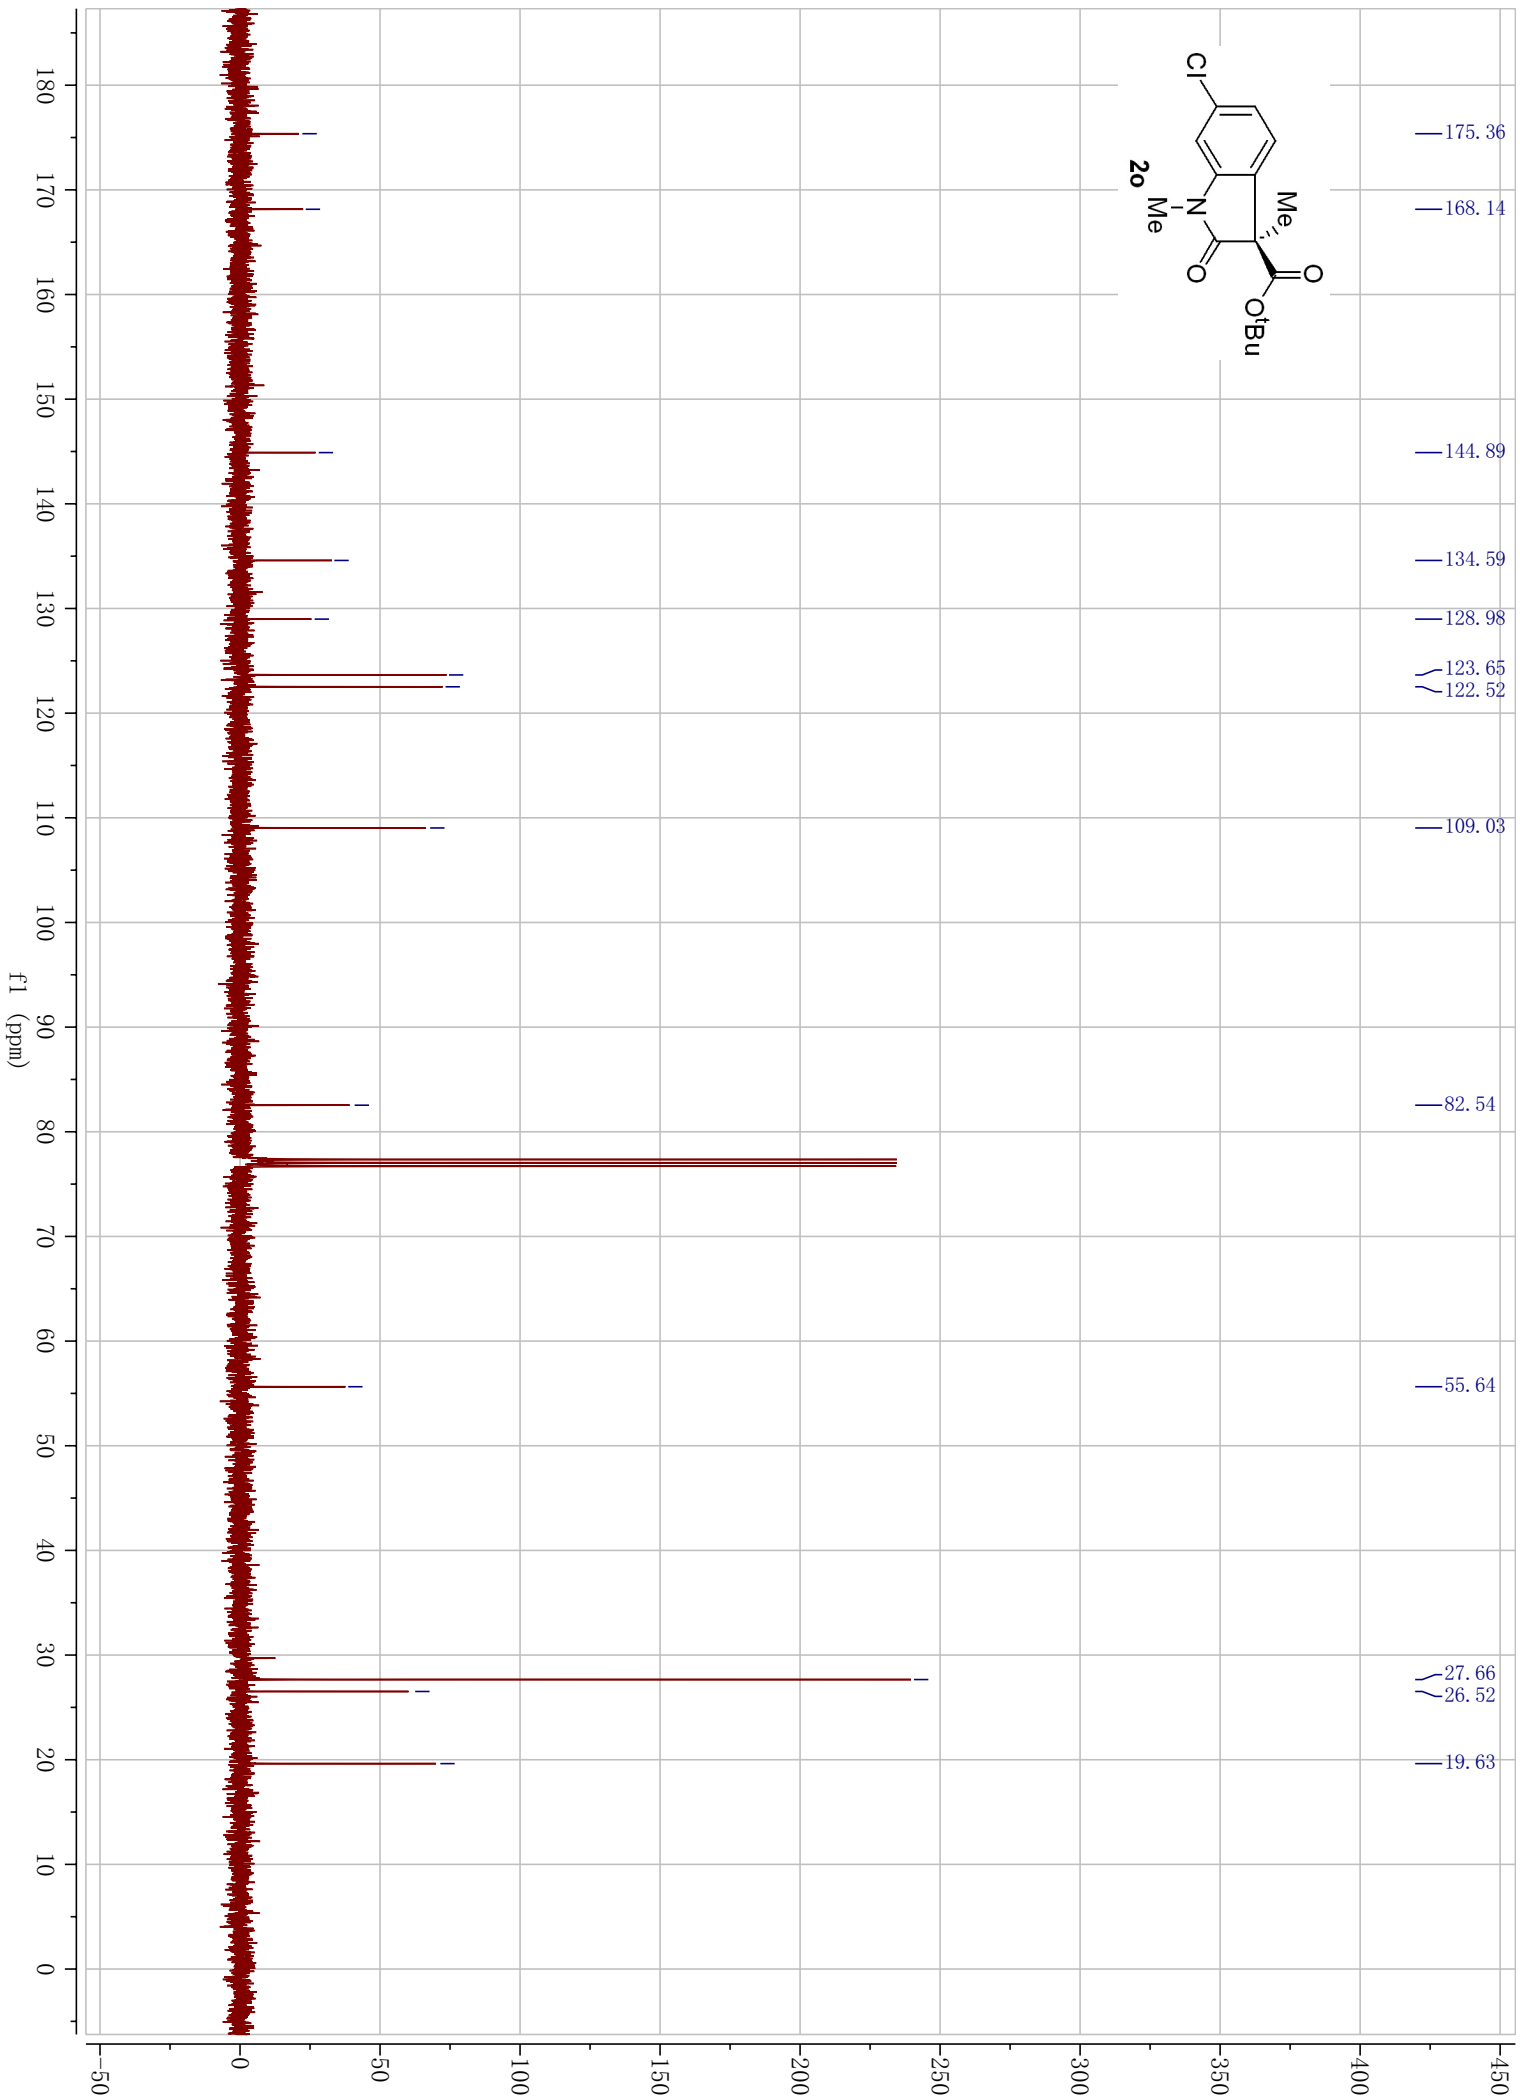

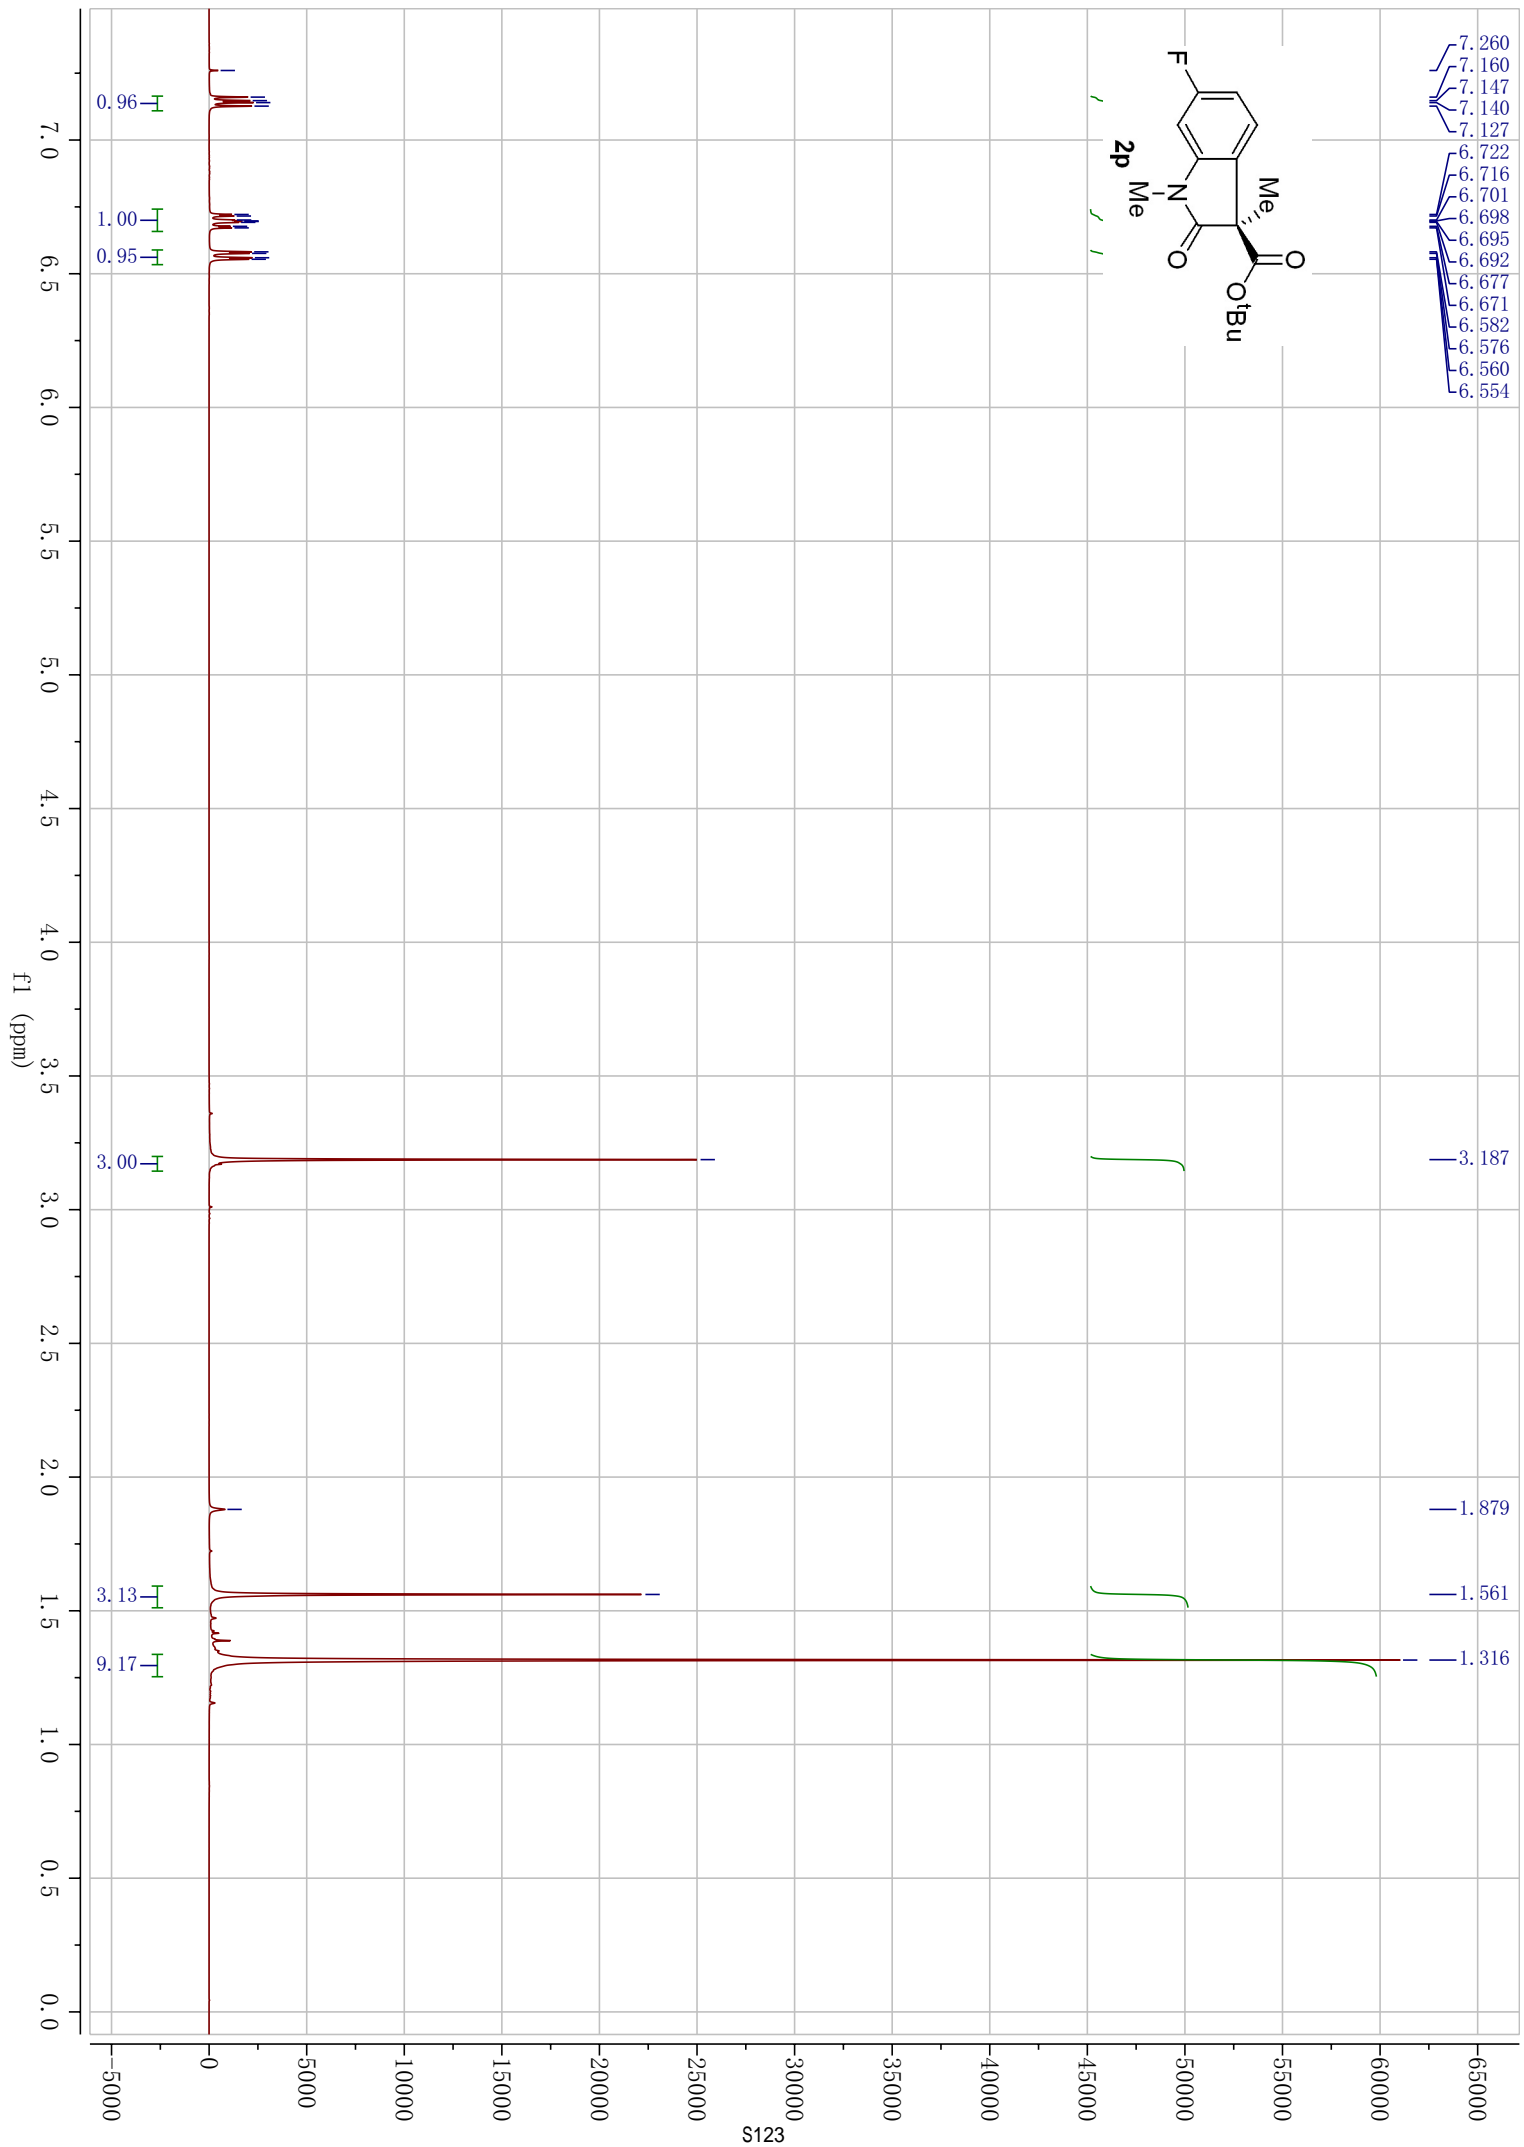

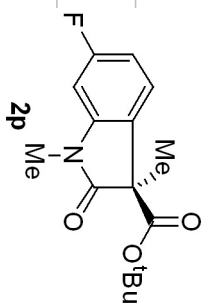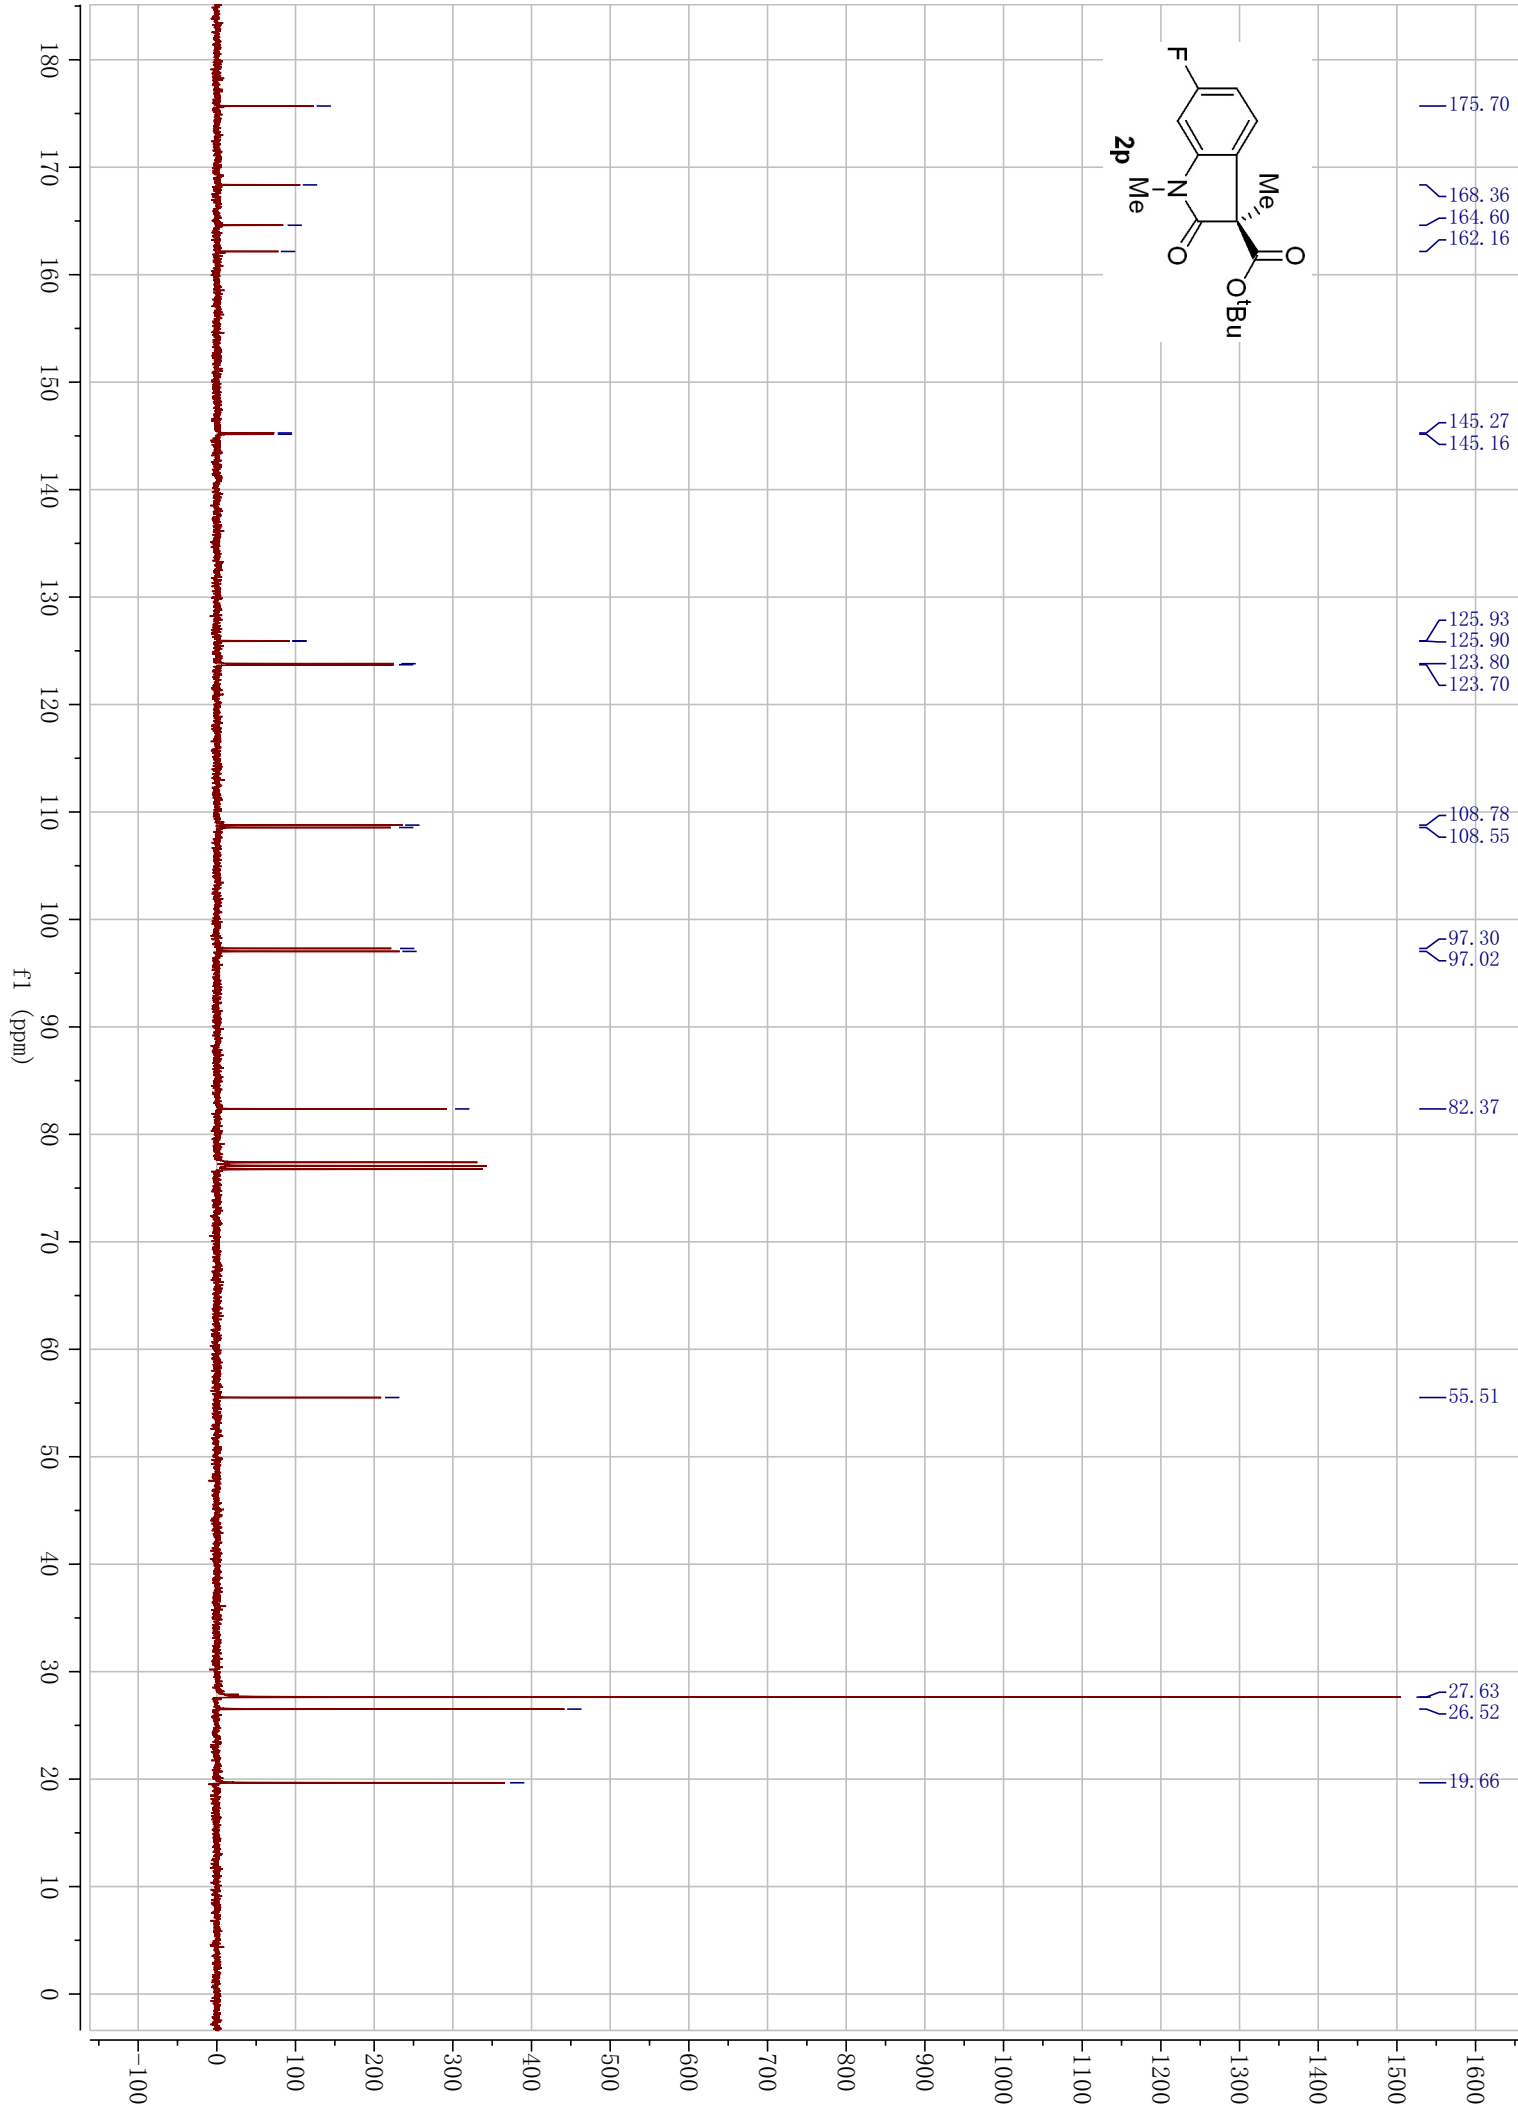



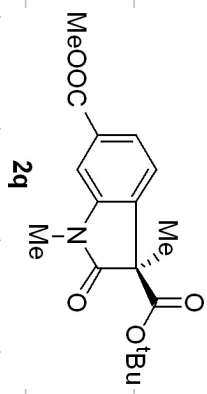

- 7.768
- 7.765
- 7.749
- 7.746
- 7.474
- 7.471
- 7.279
- 7.260

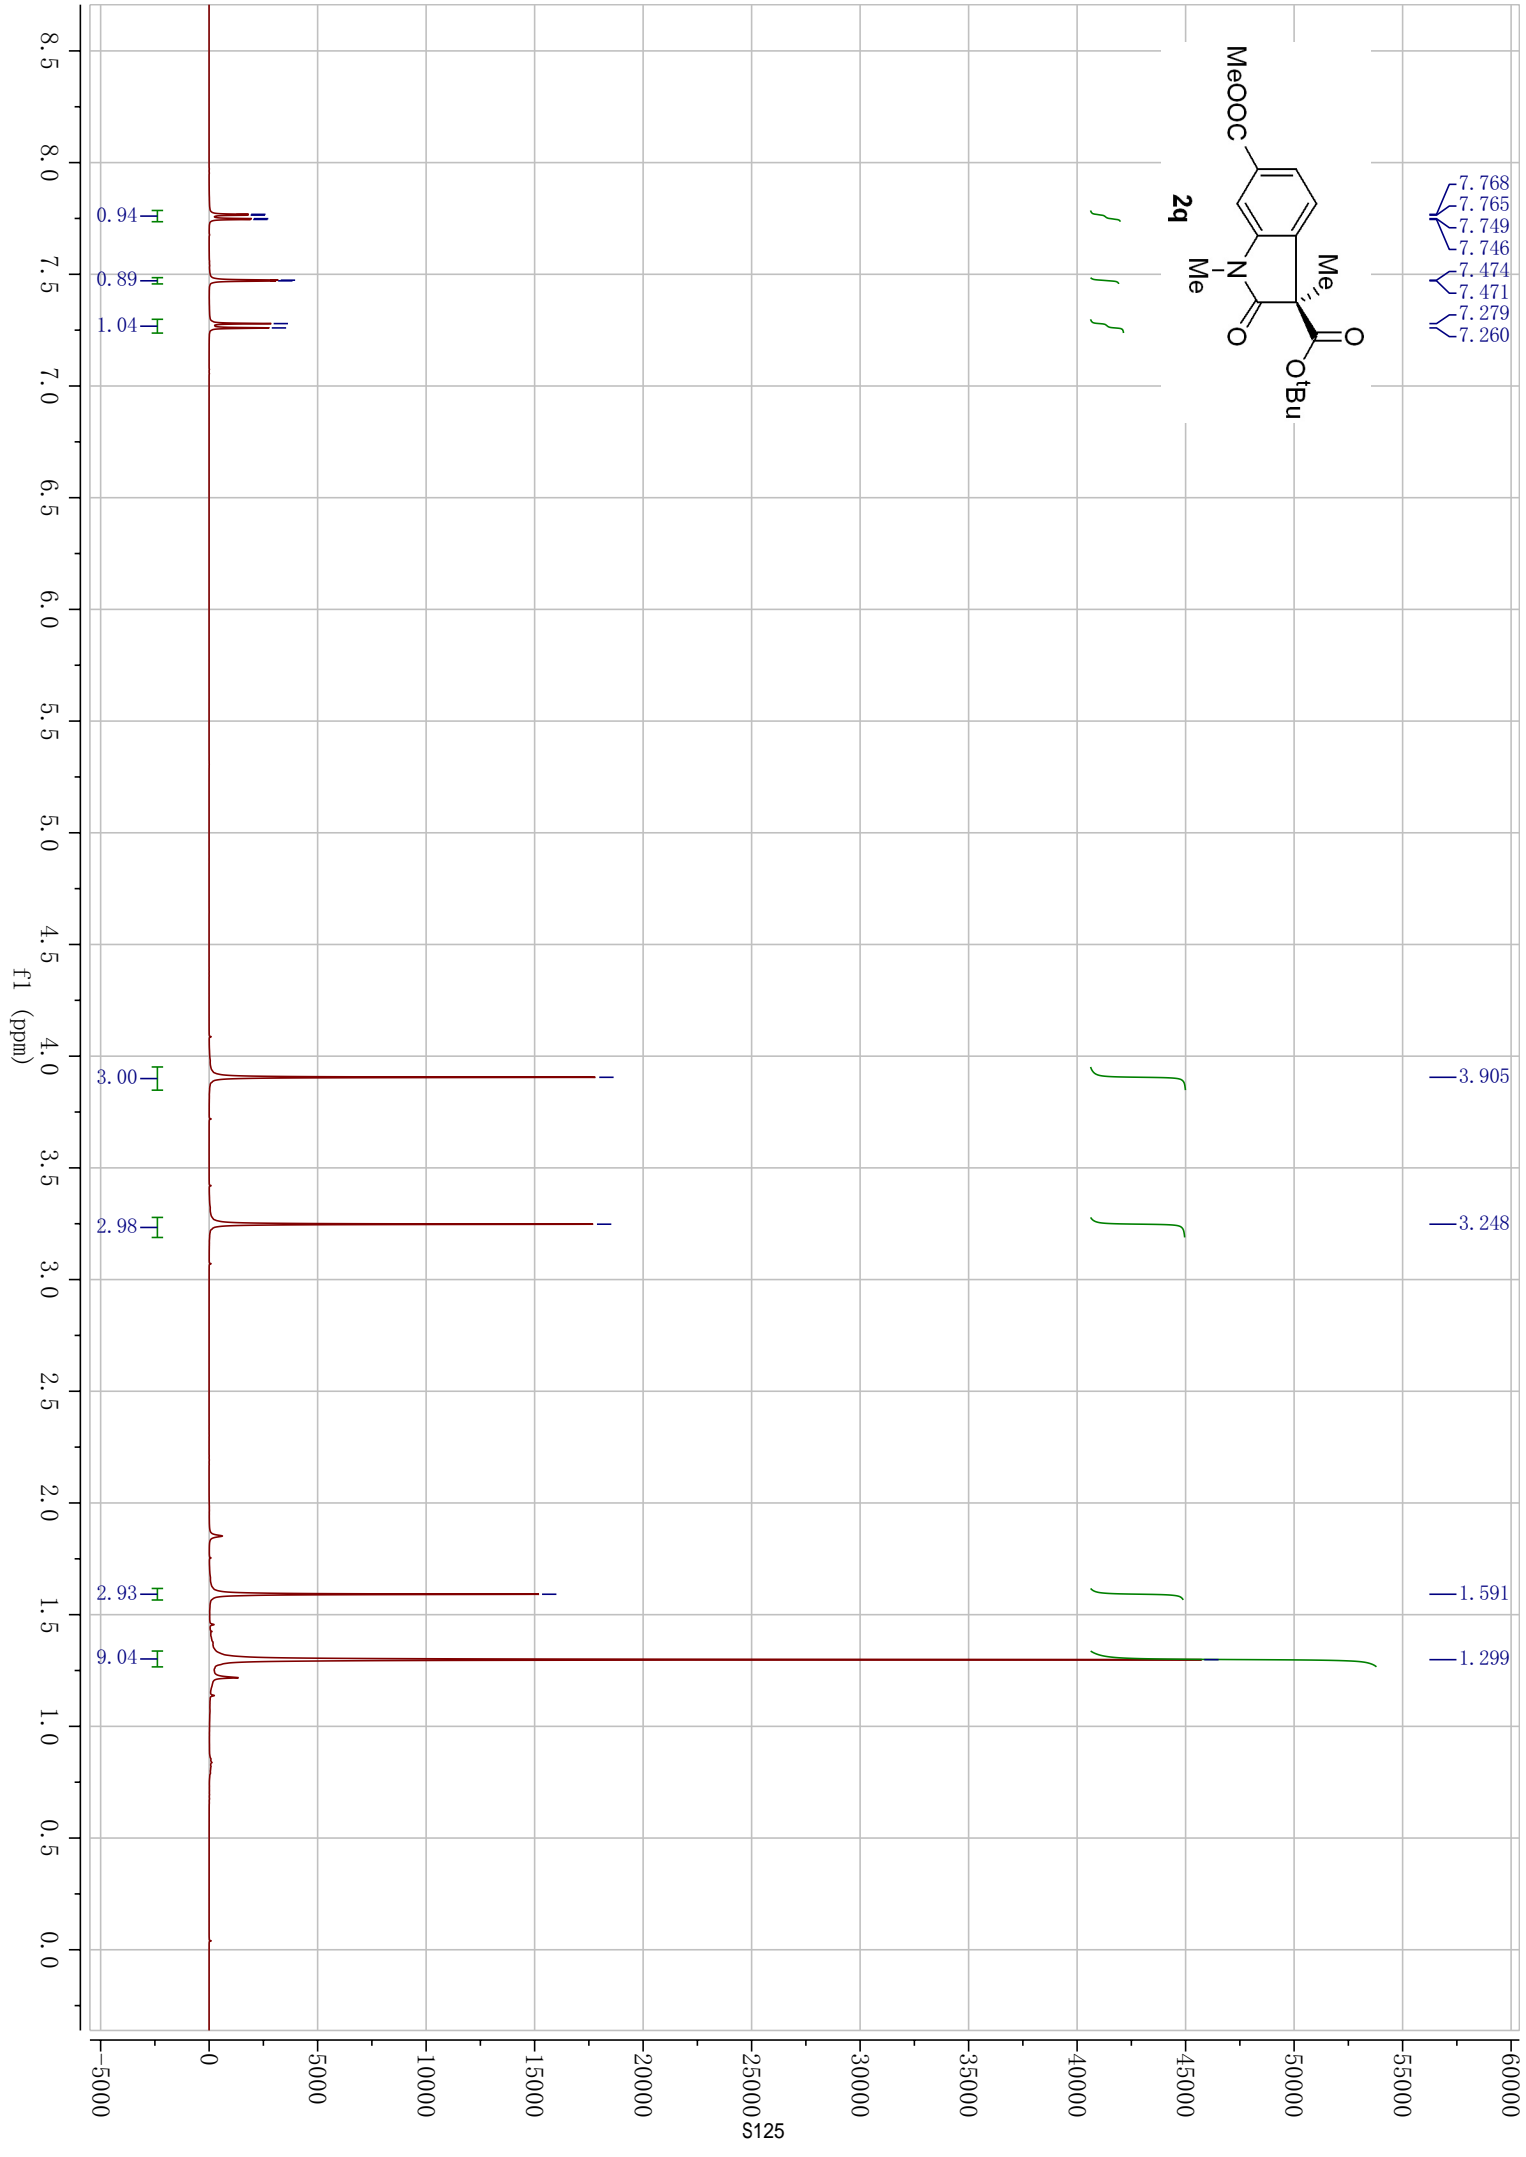

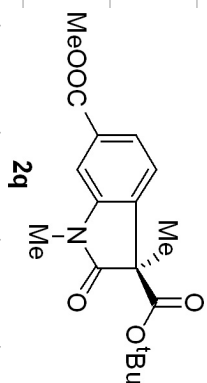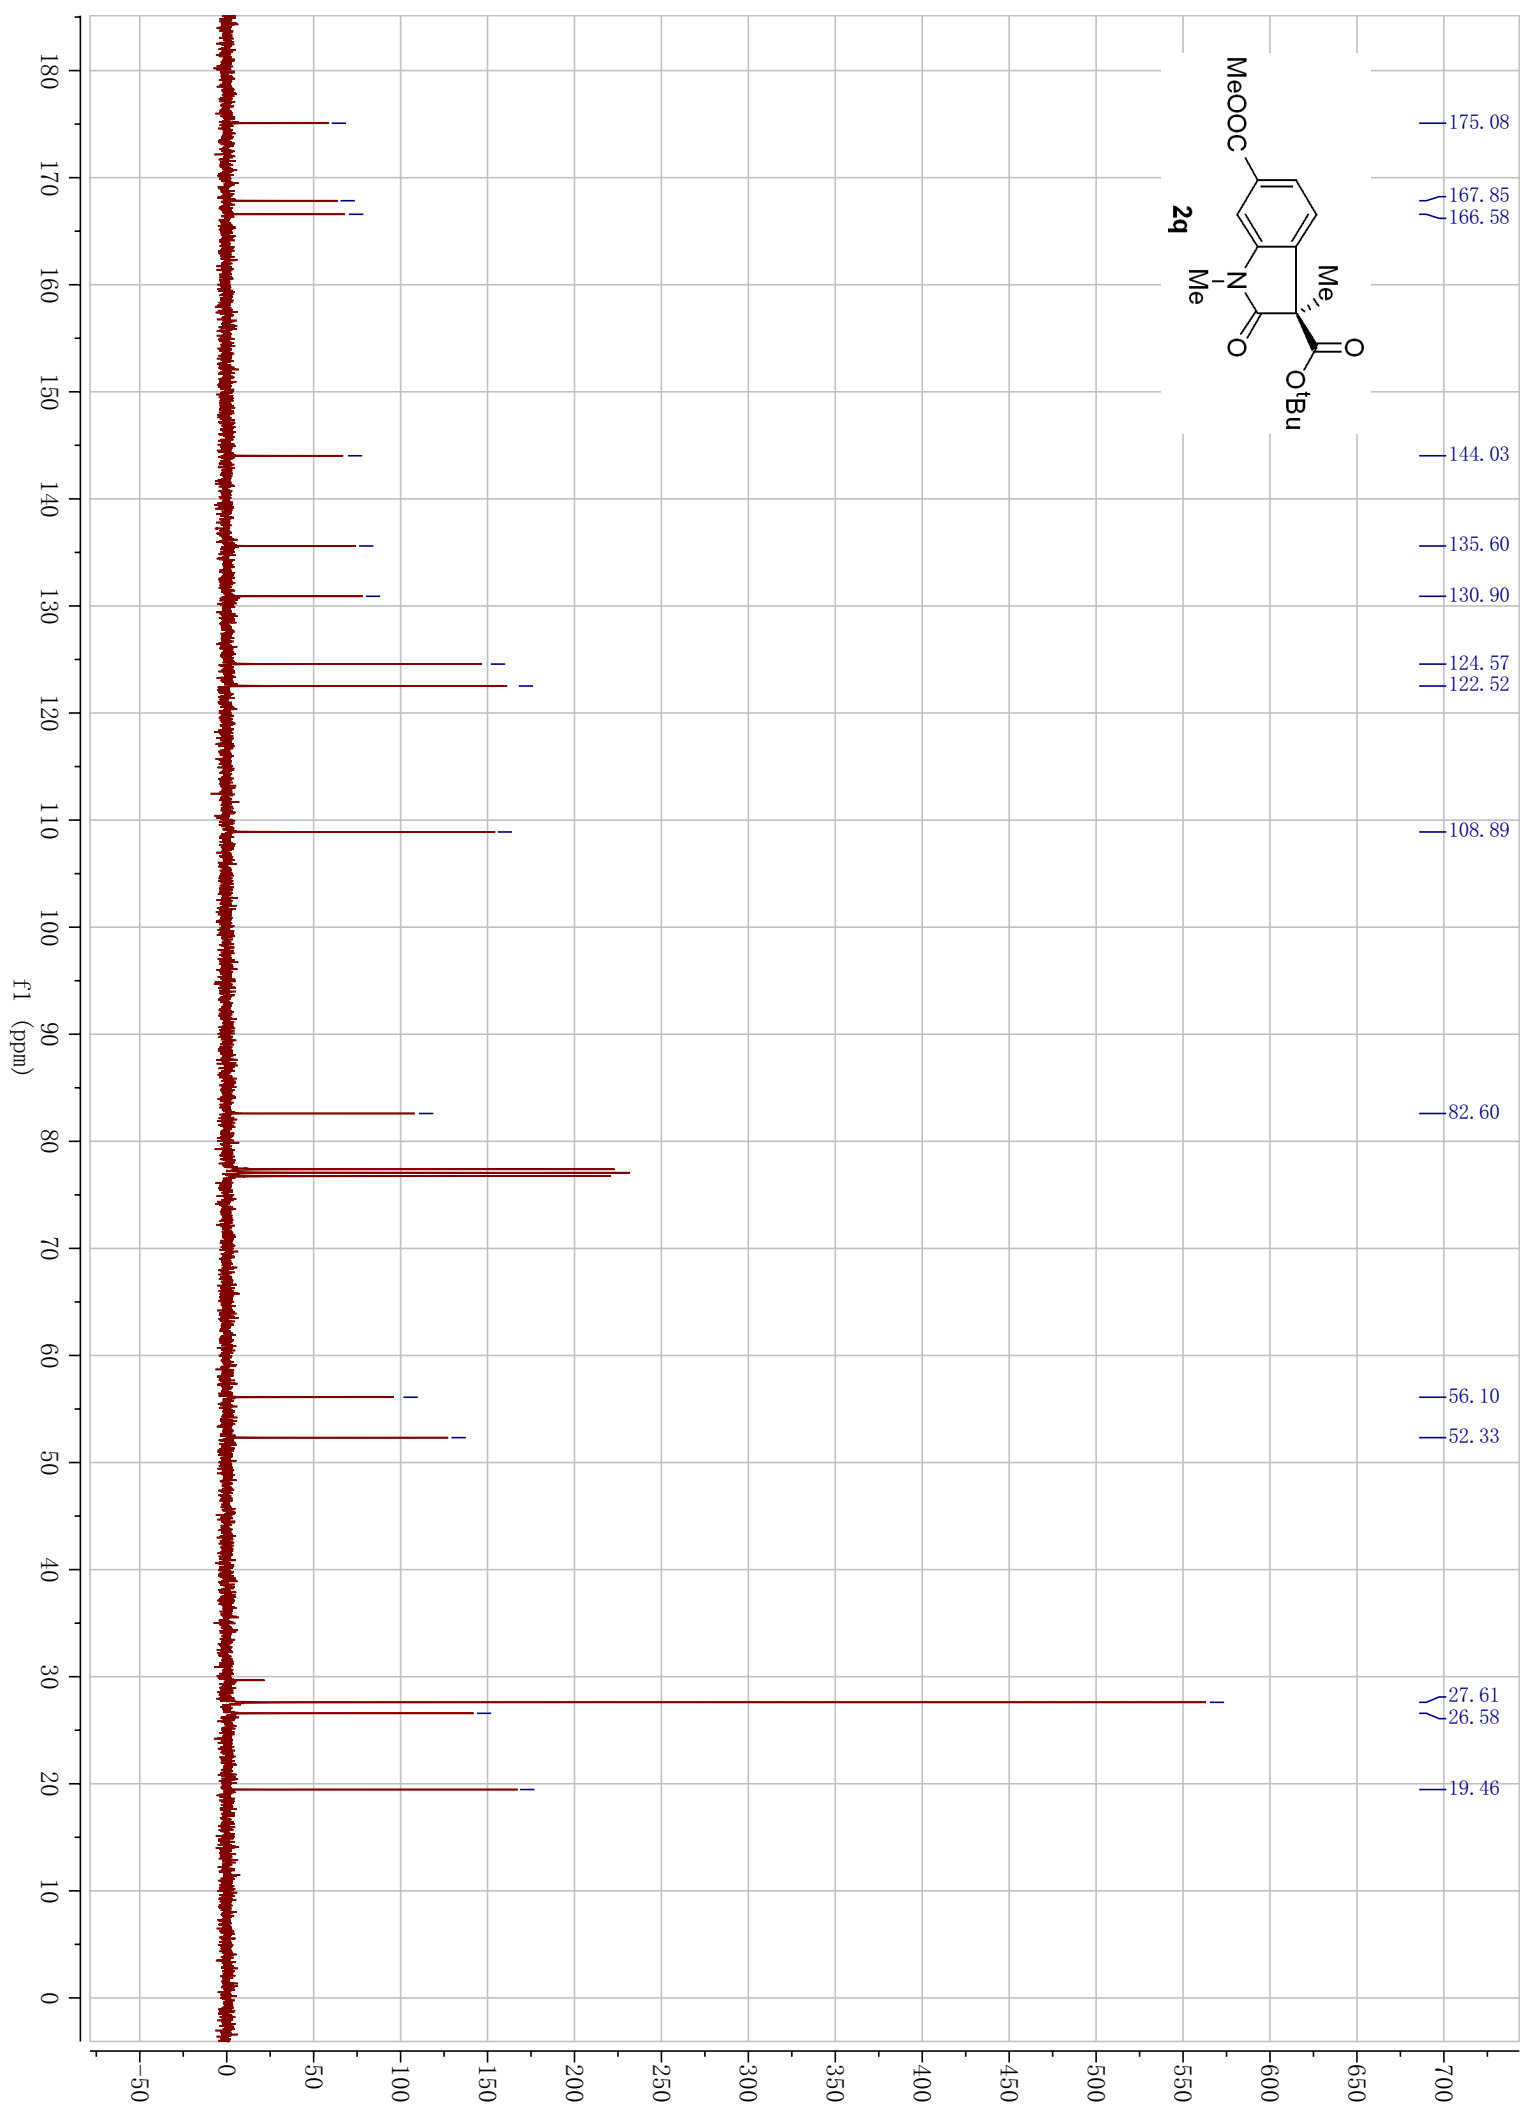

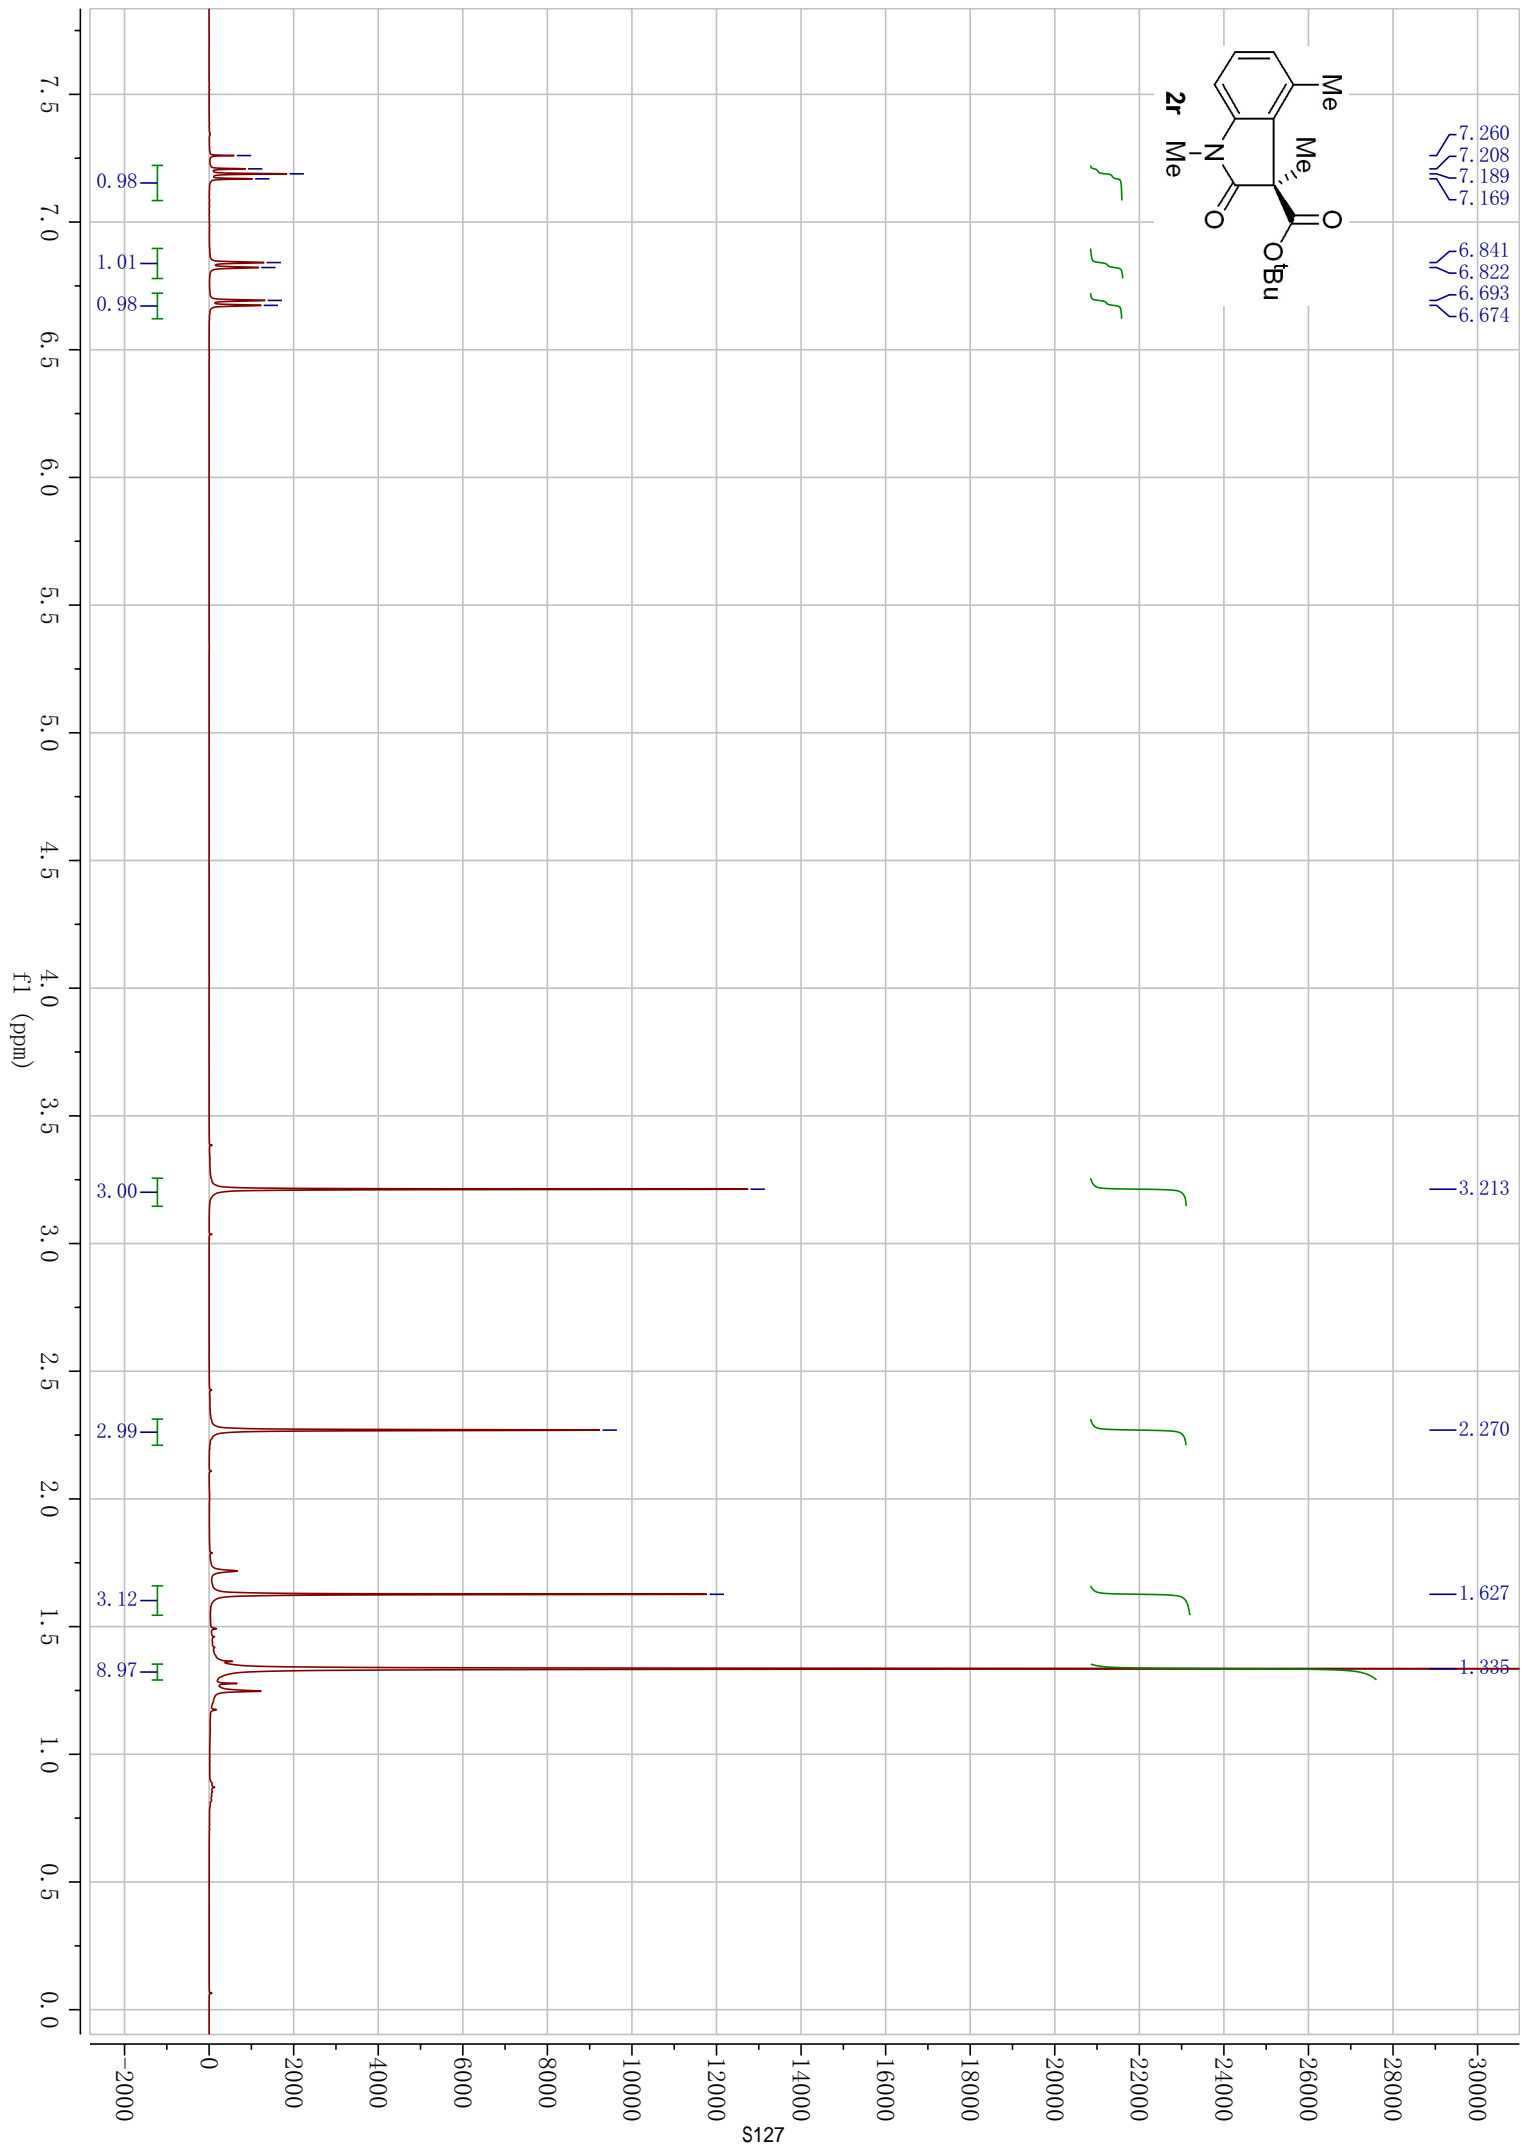

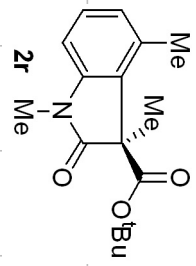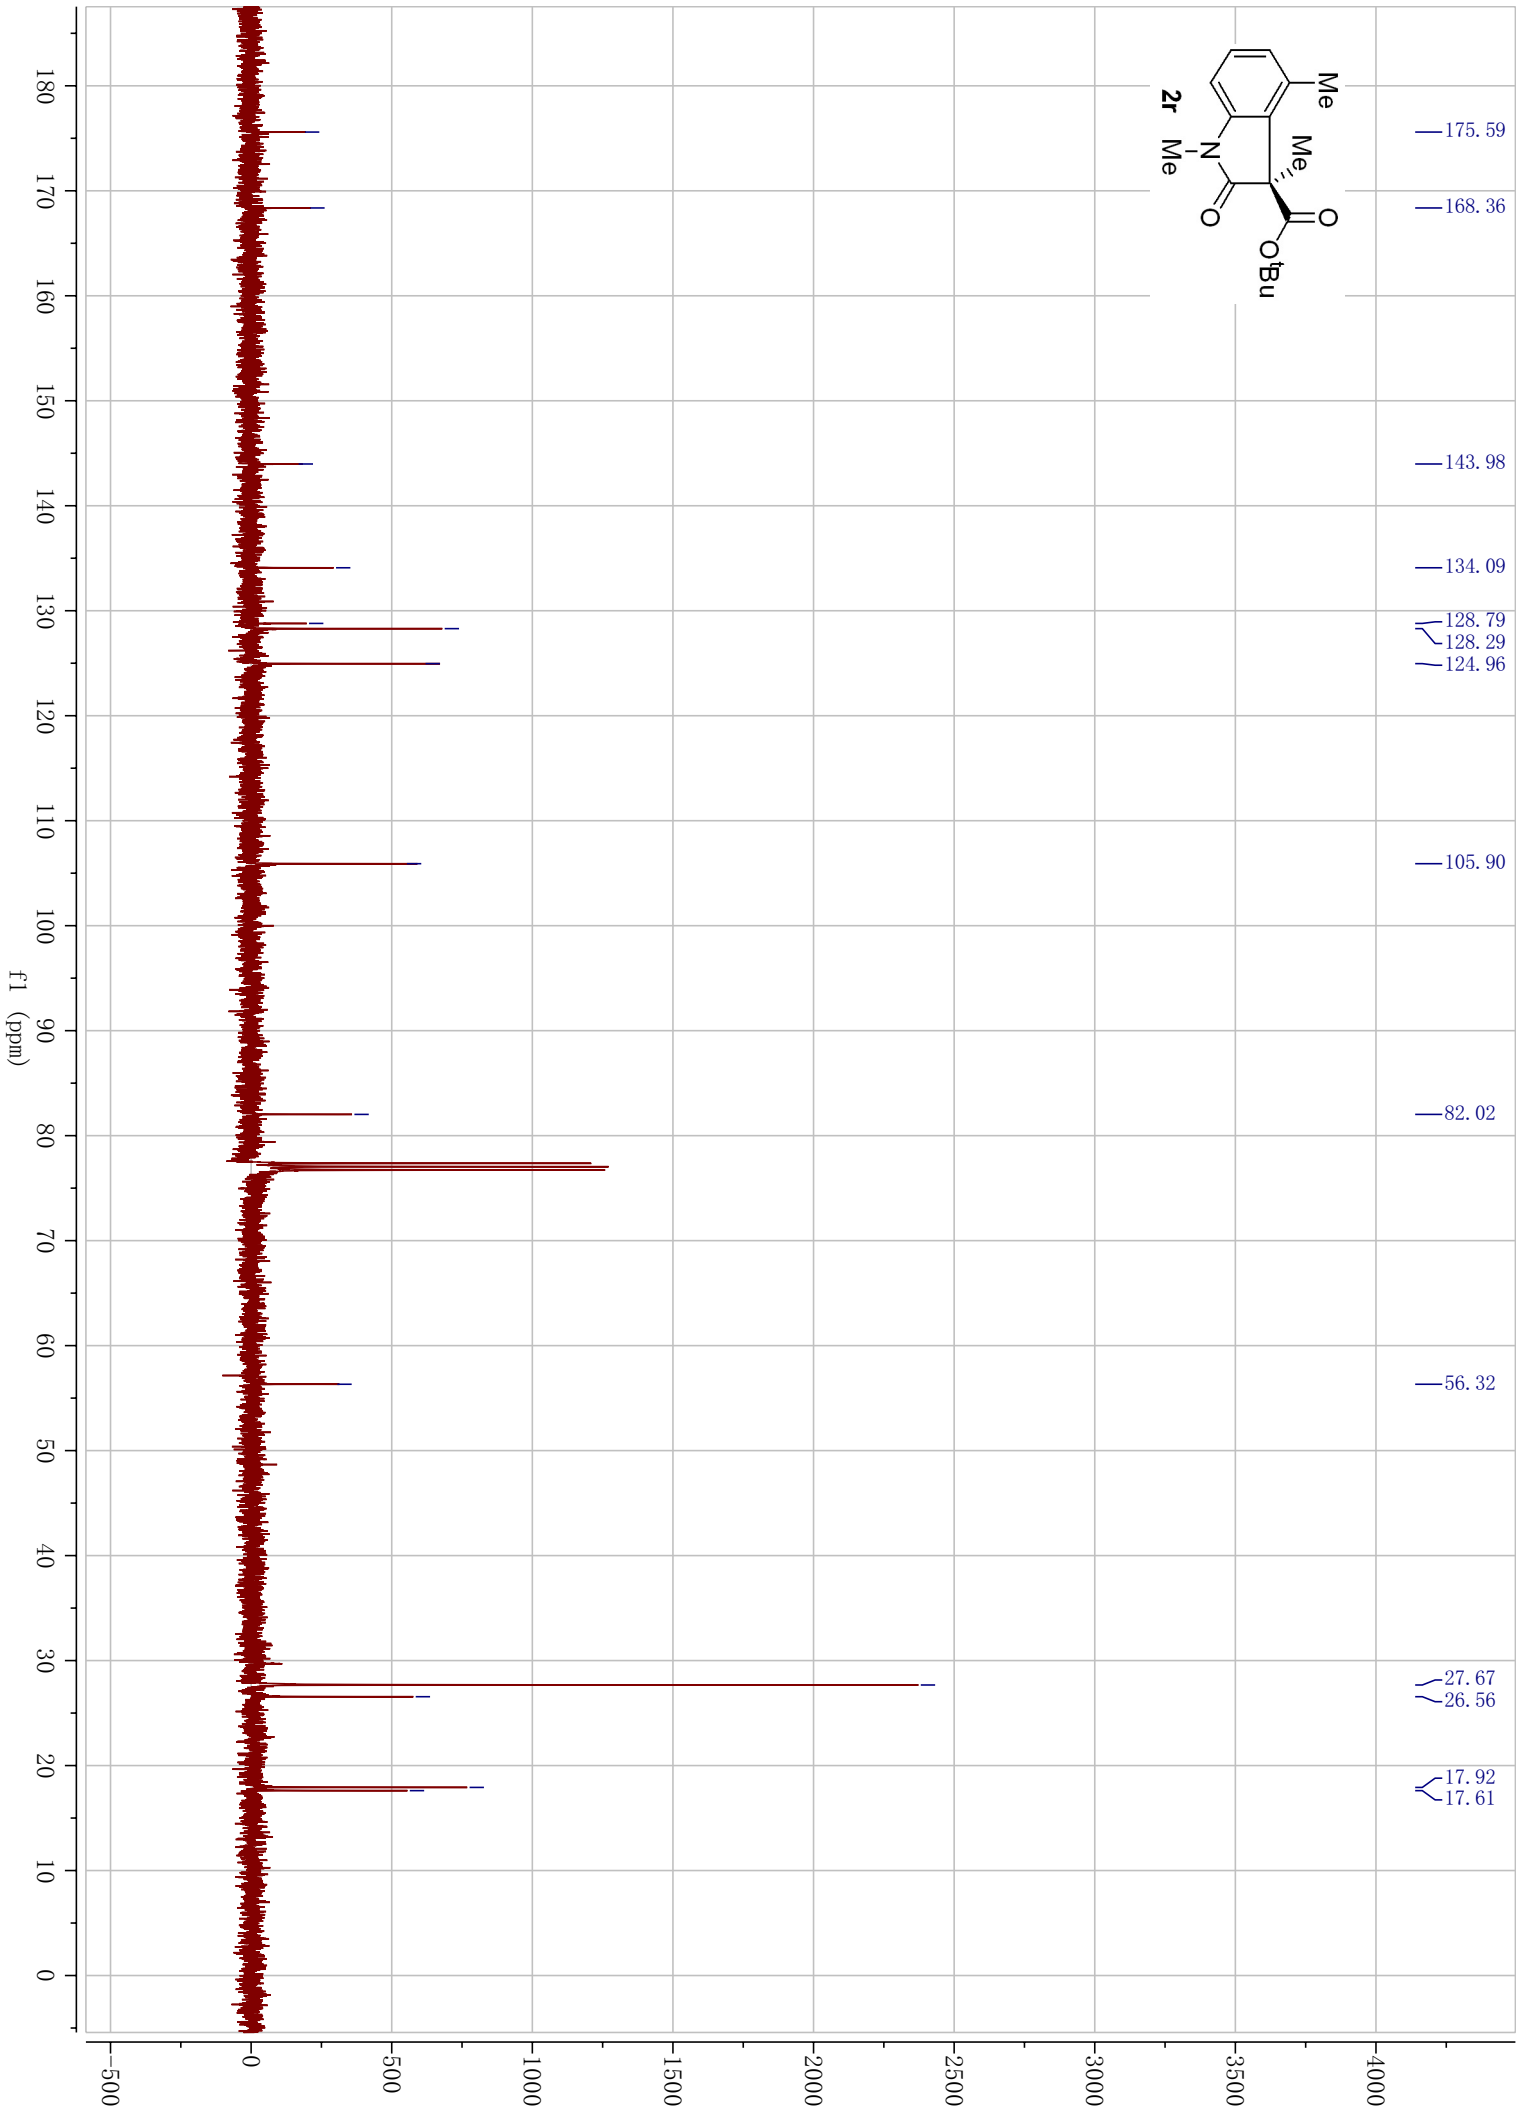

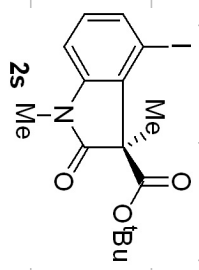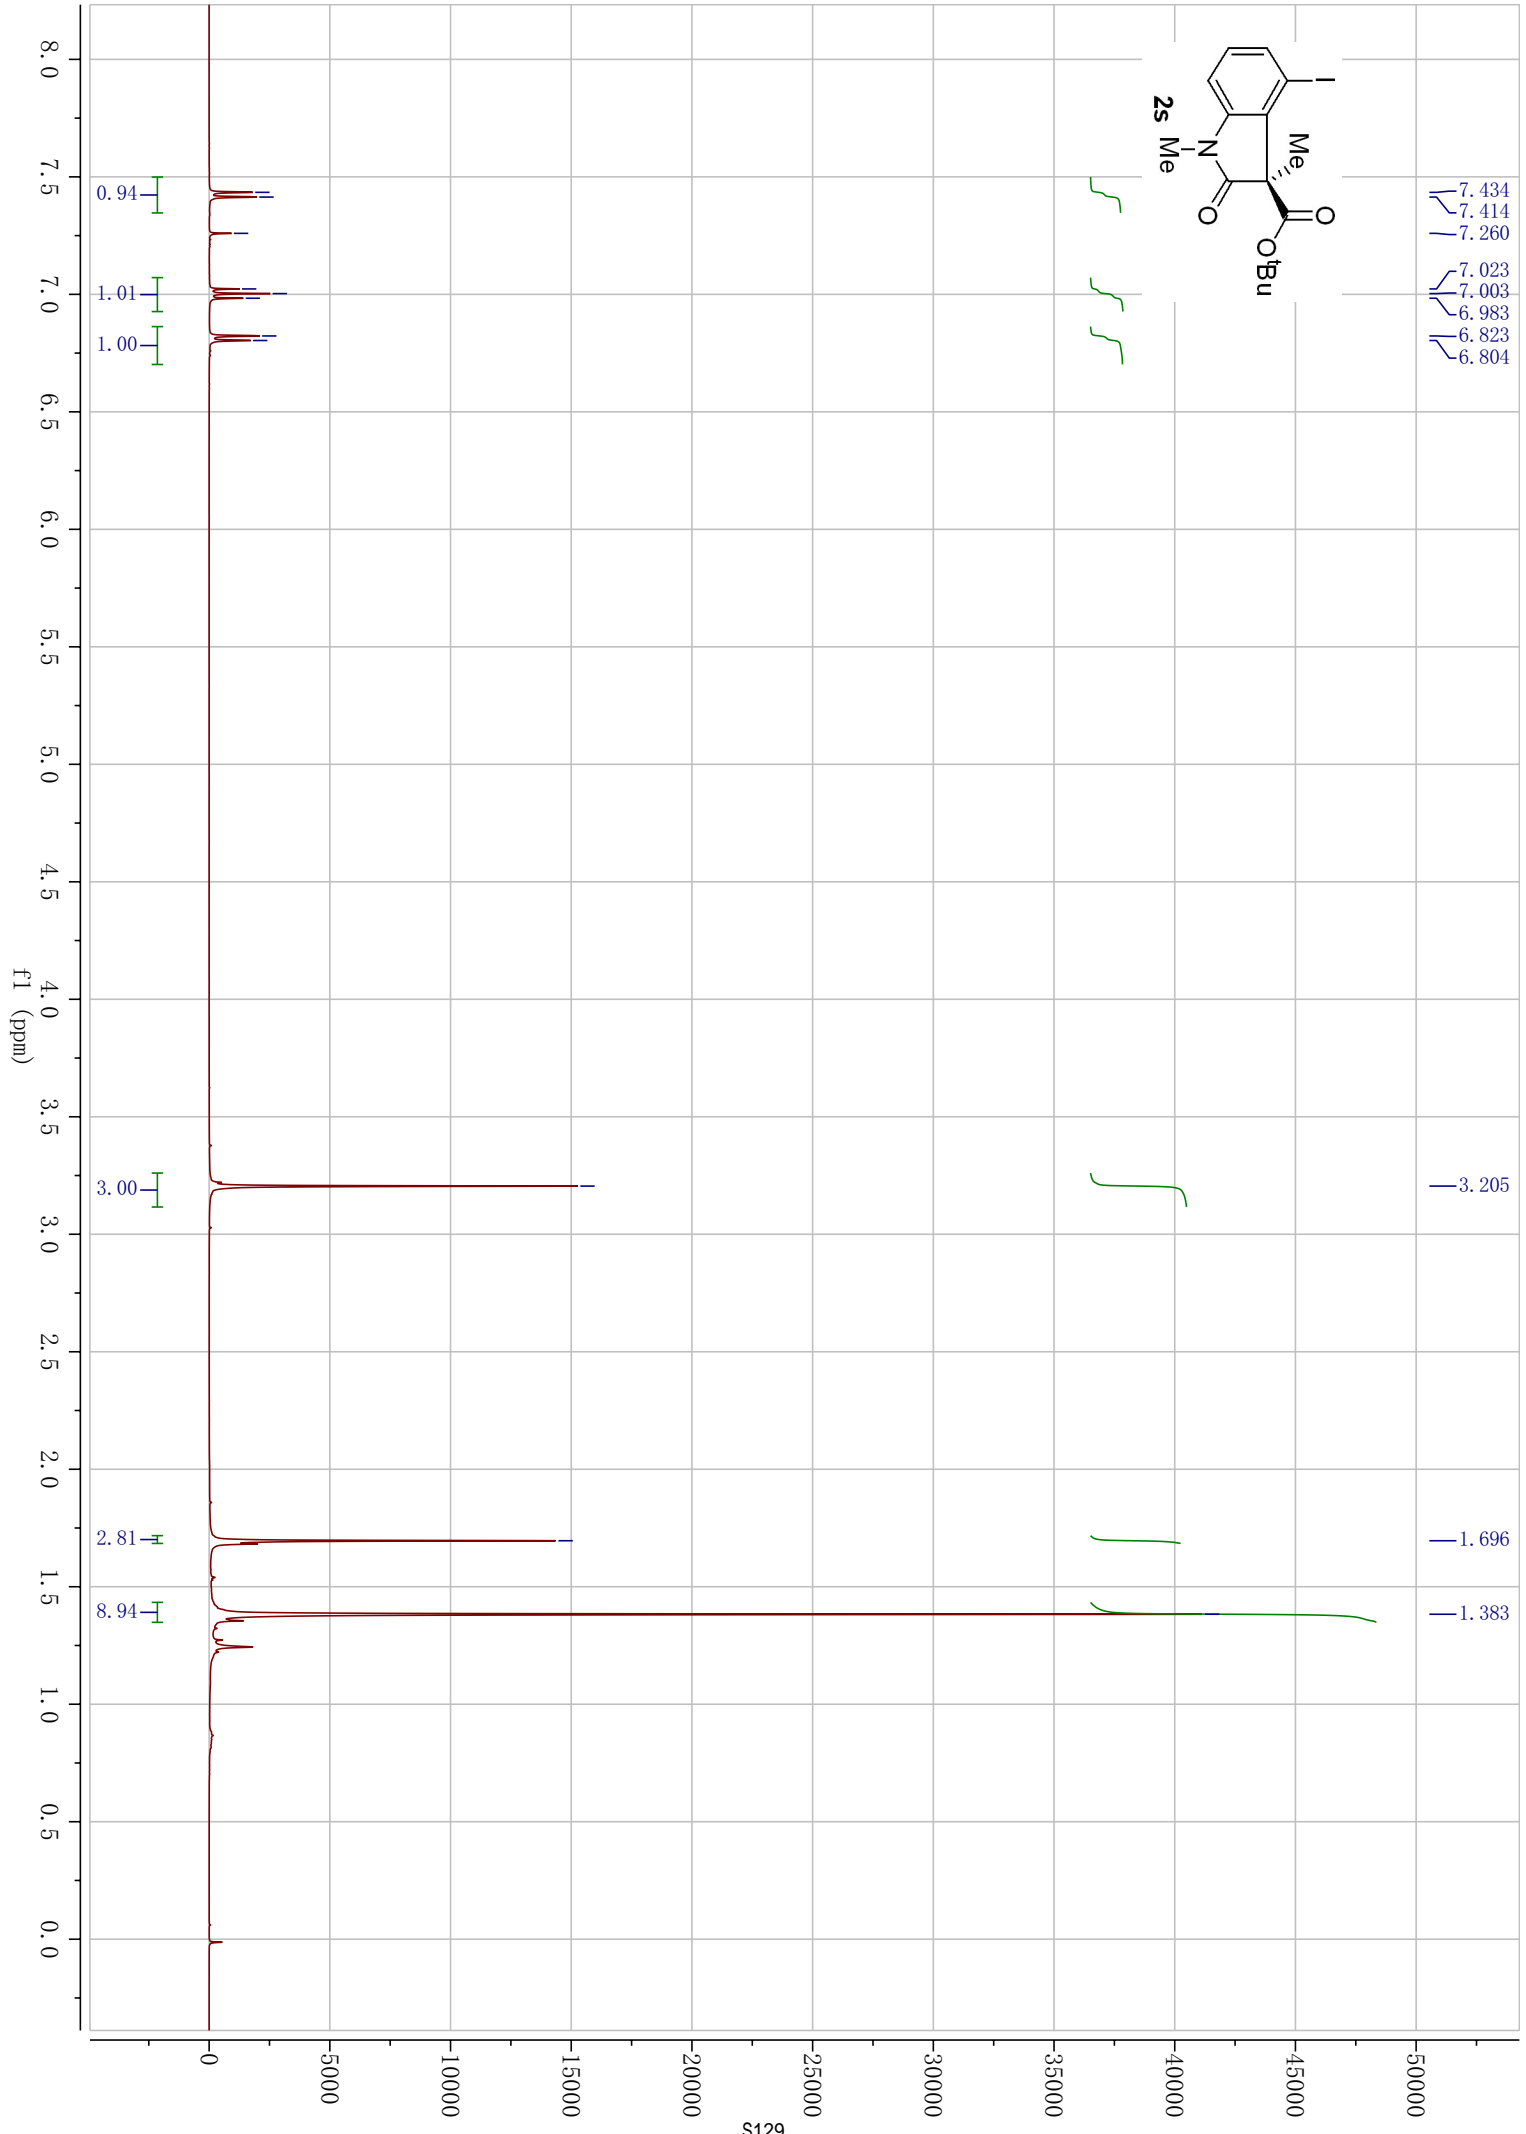

- 7.434
- 7.414
- 7.260
- 7.023
- 7.003
- 6.983
- 6.823
- 6.804

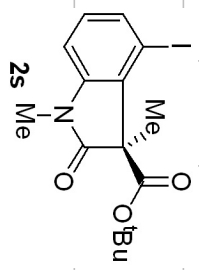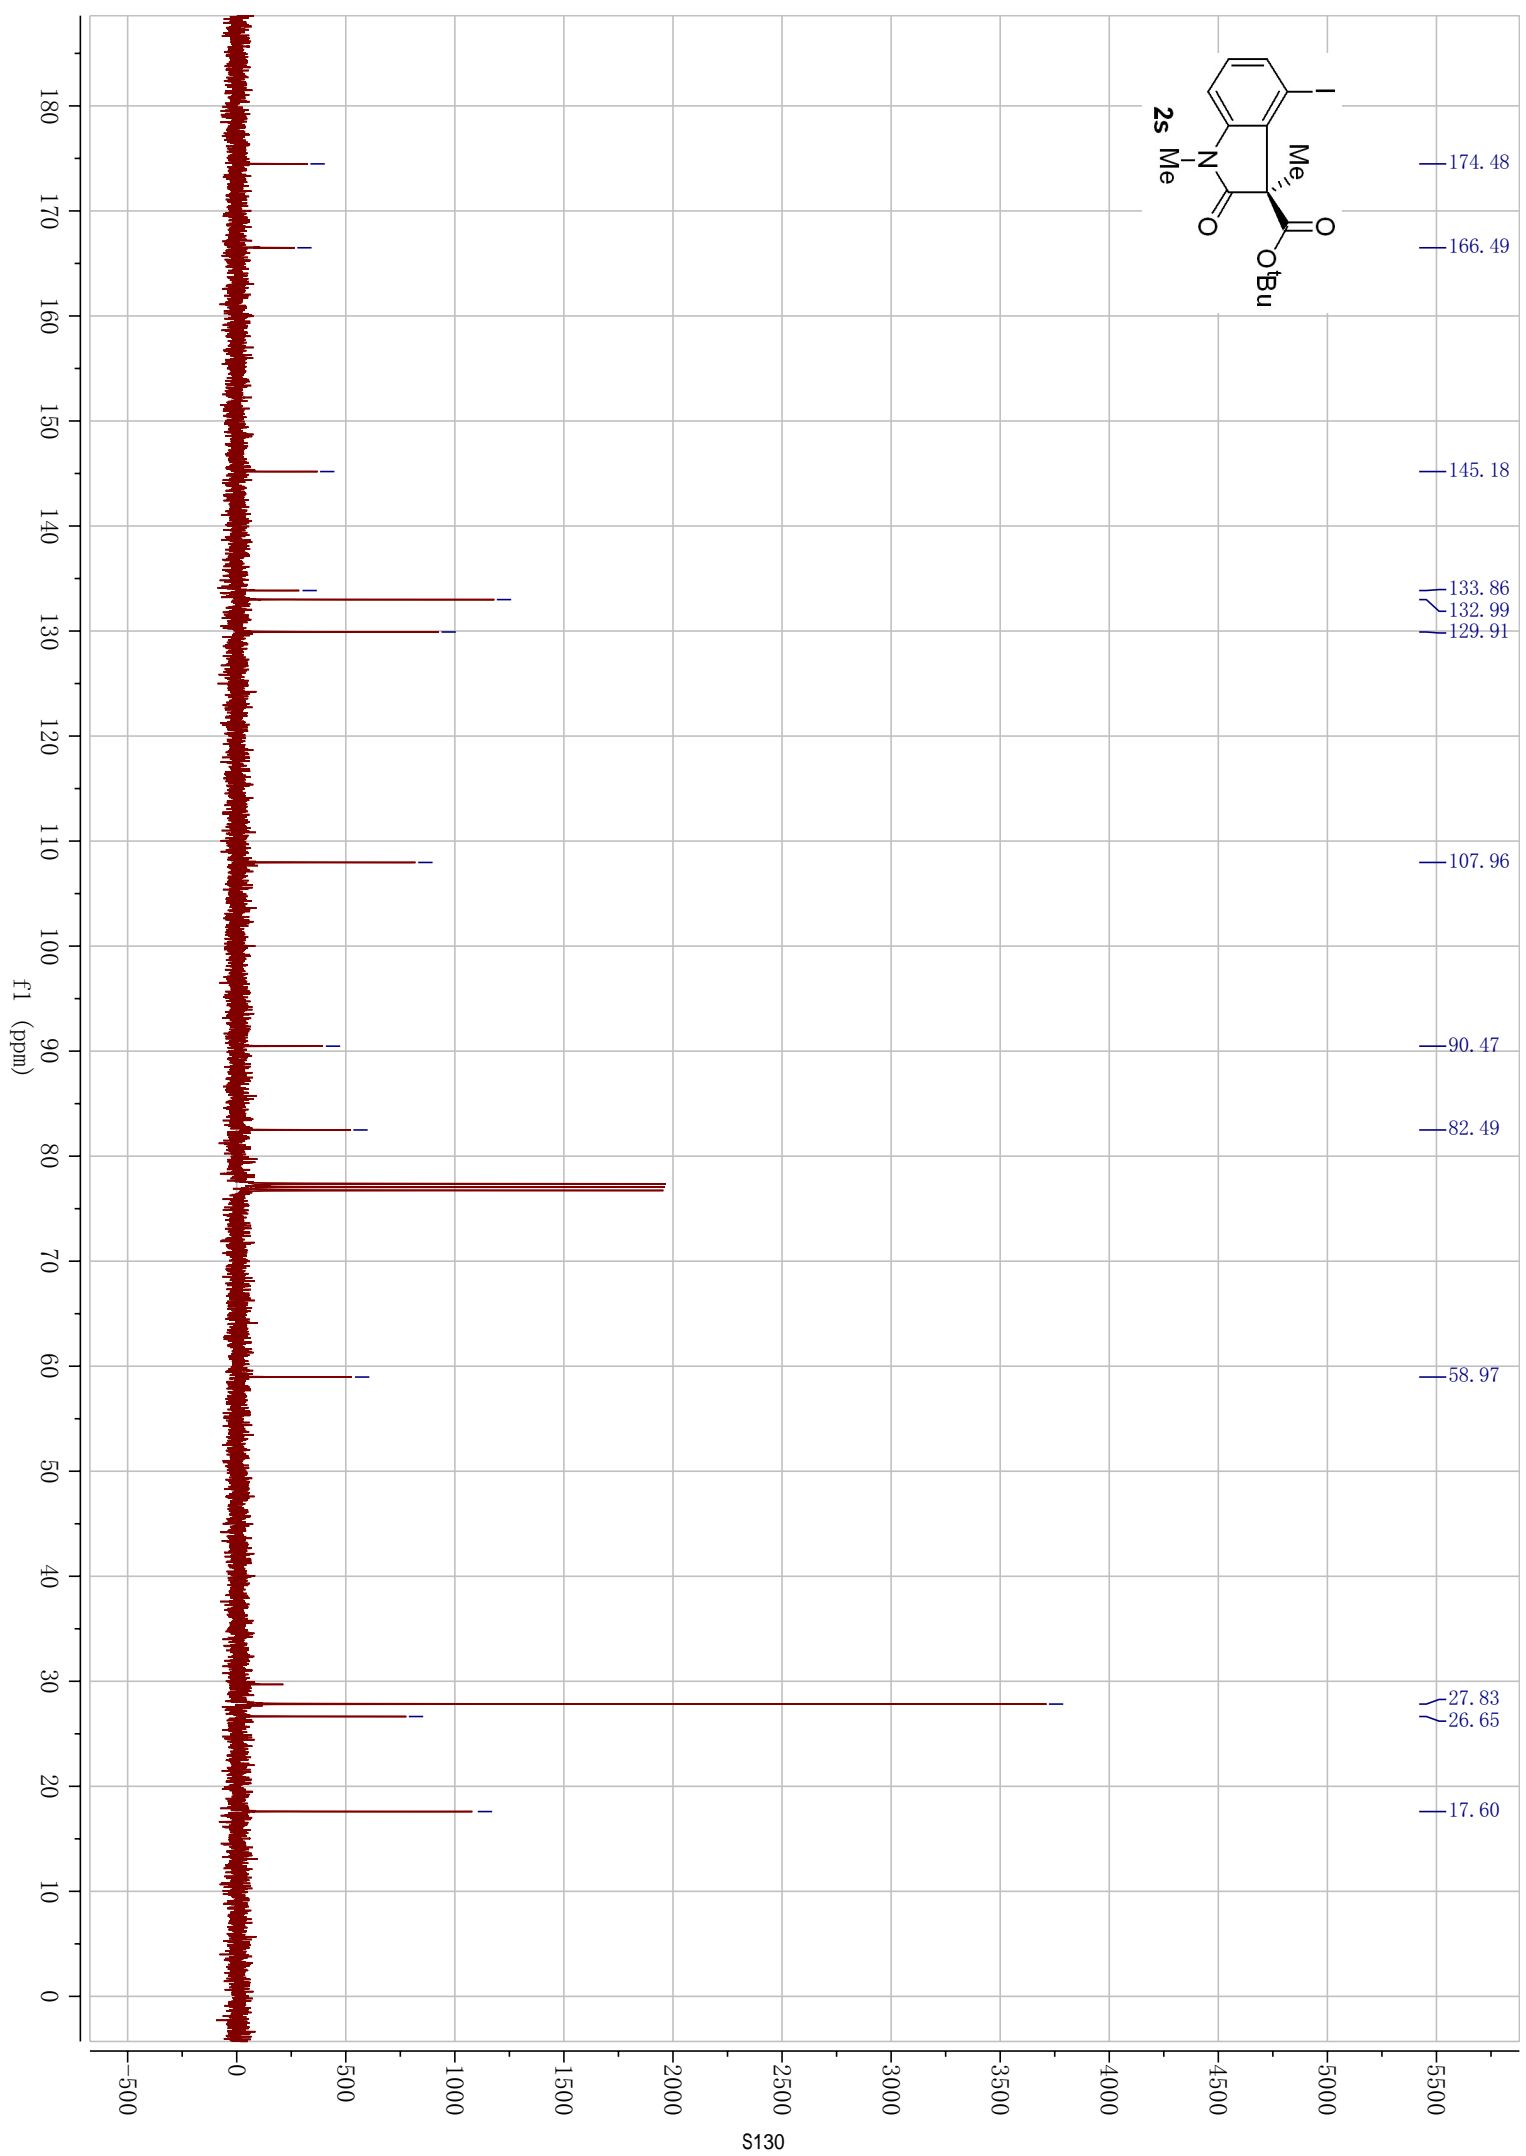

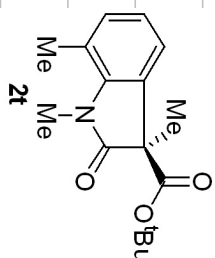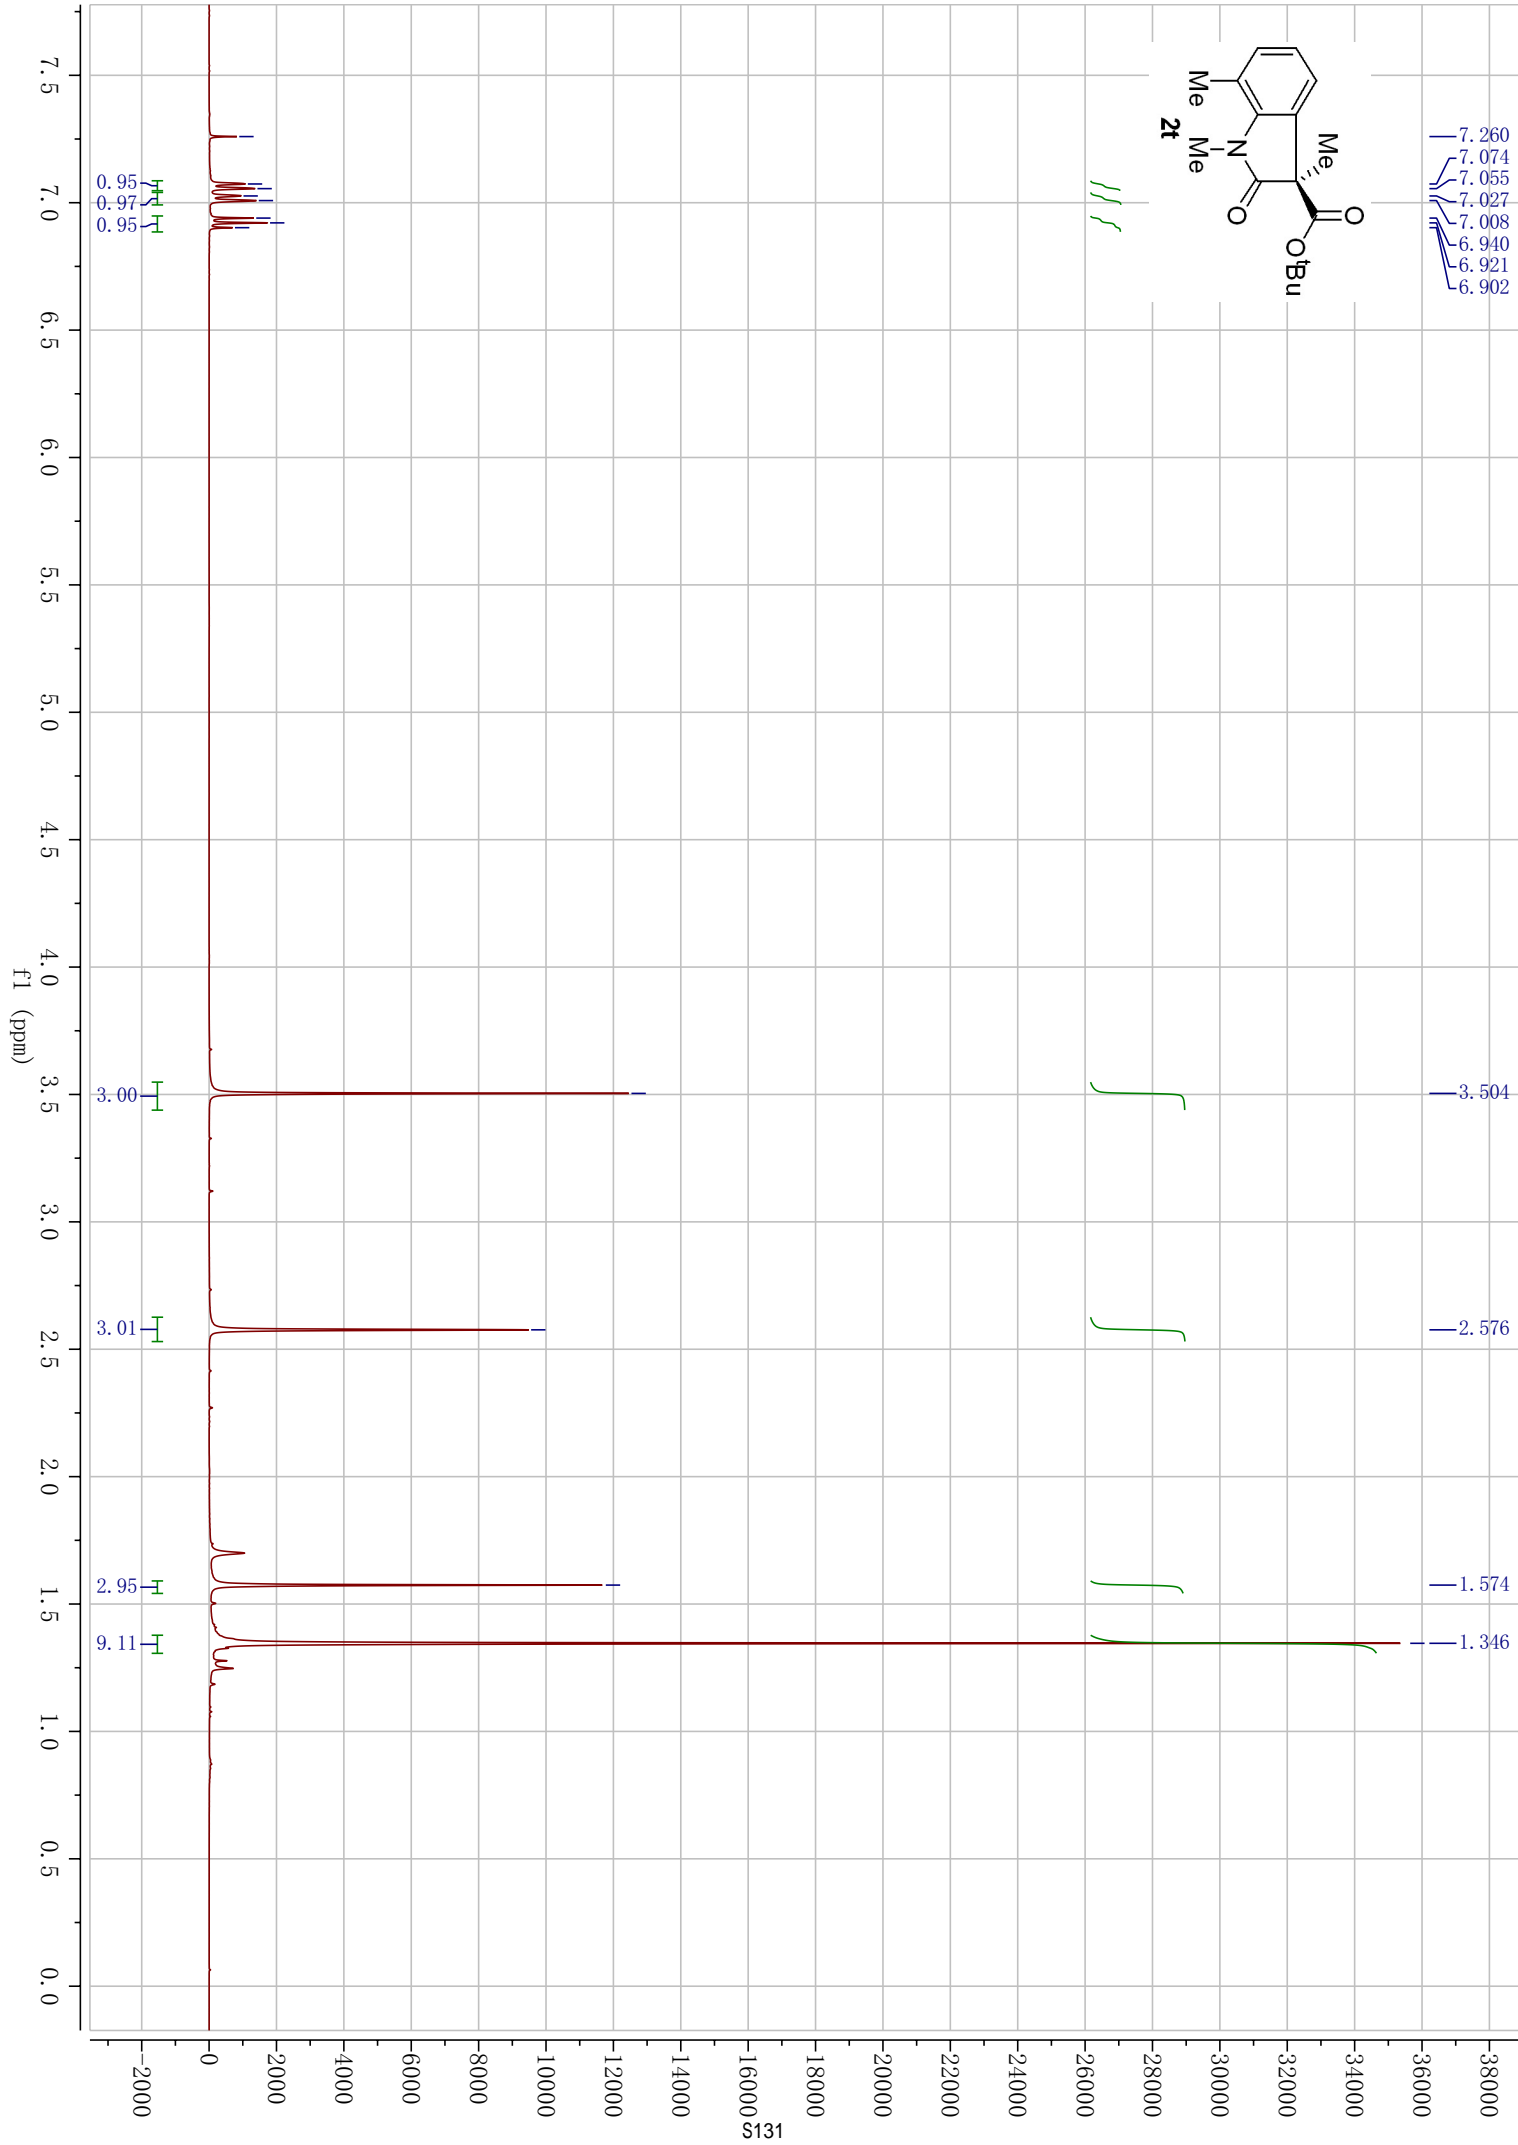

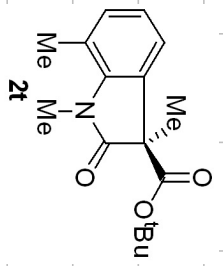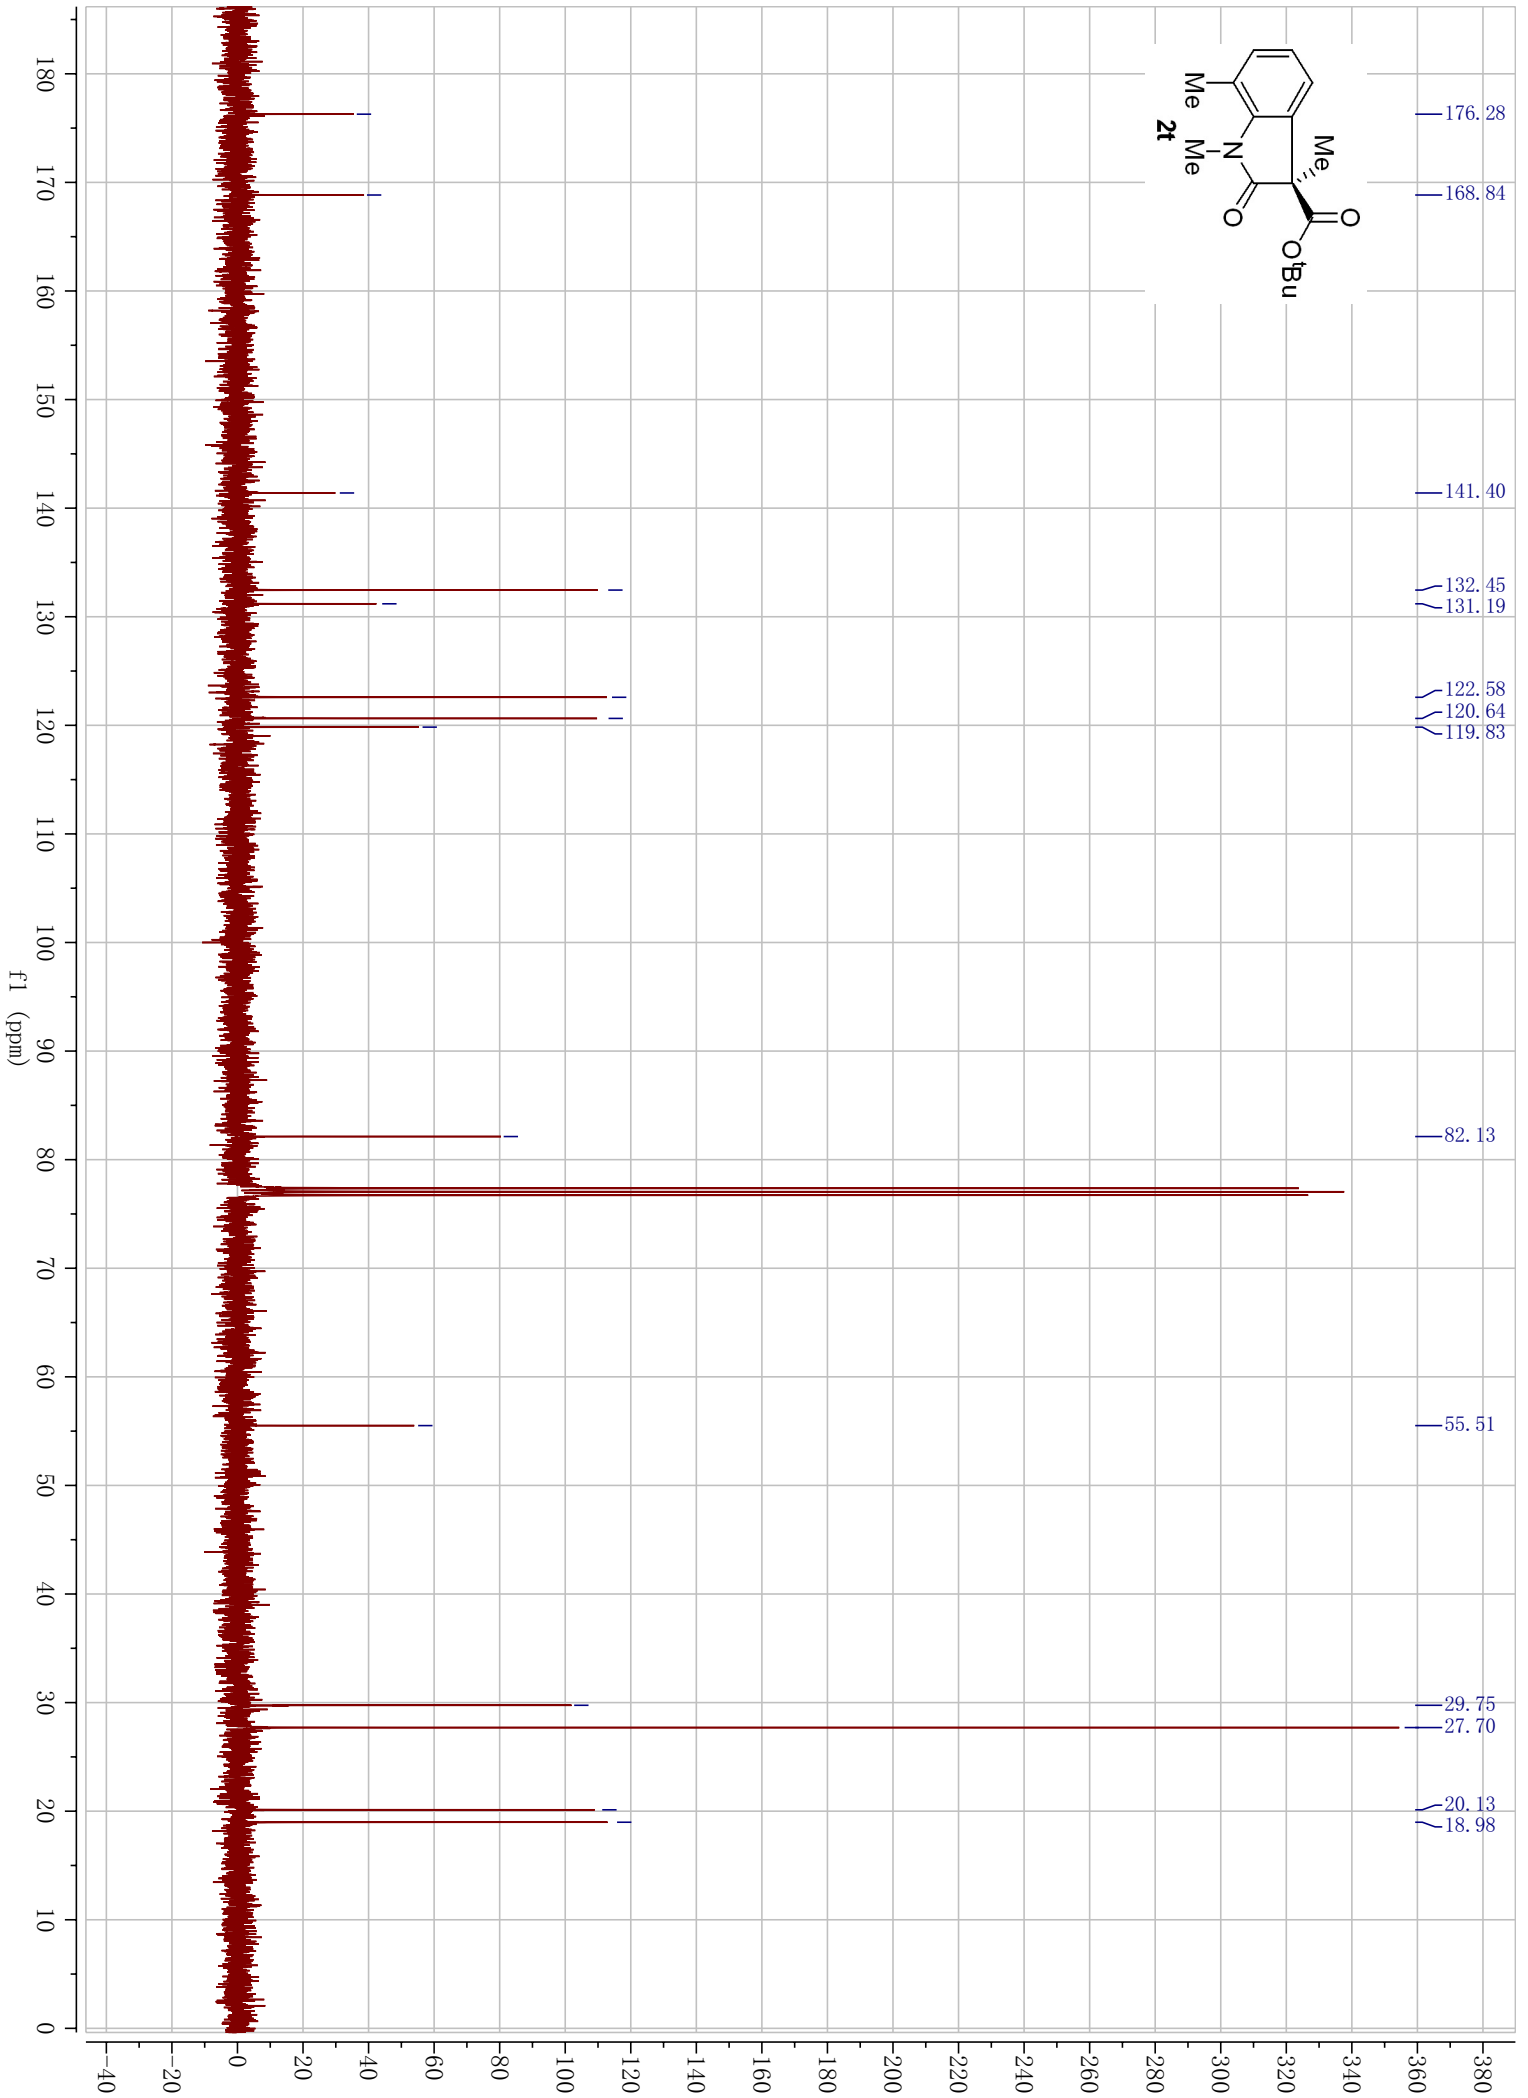



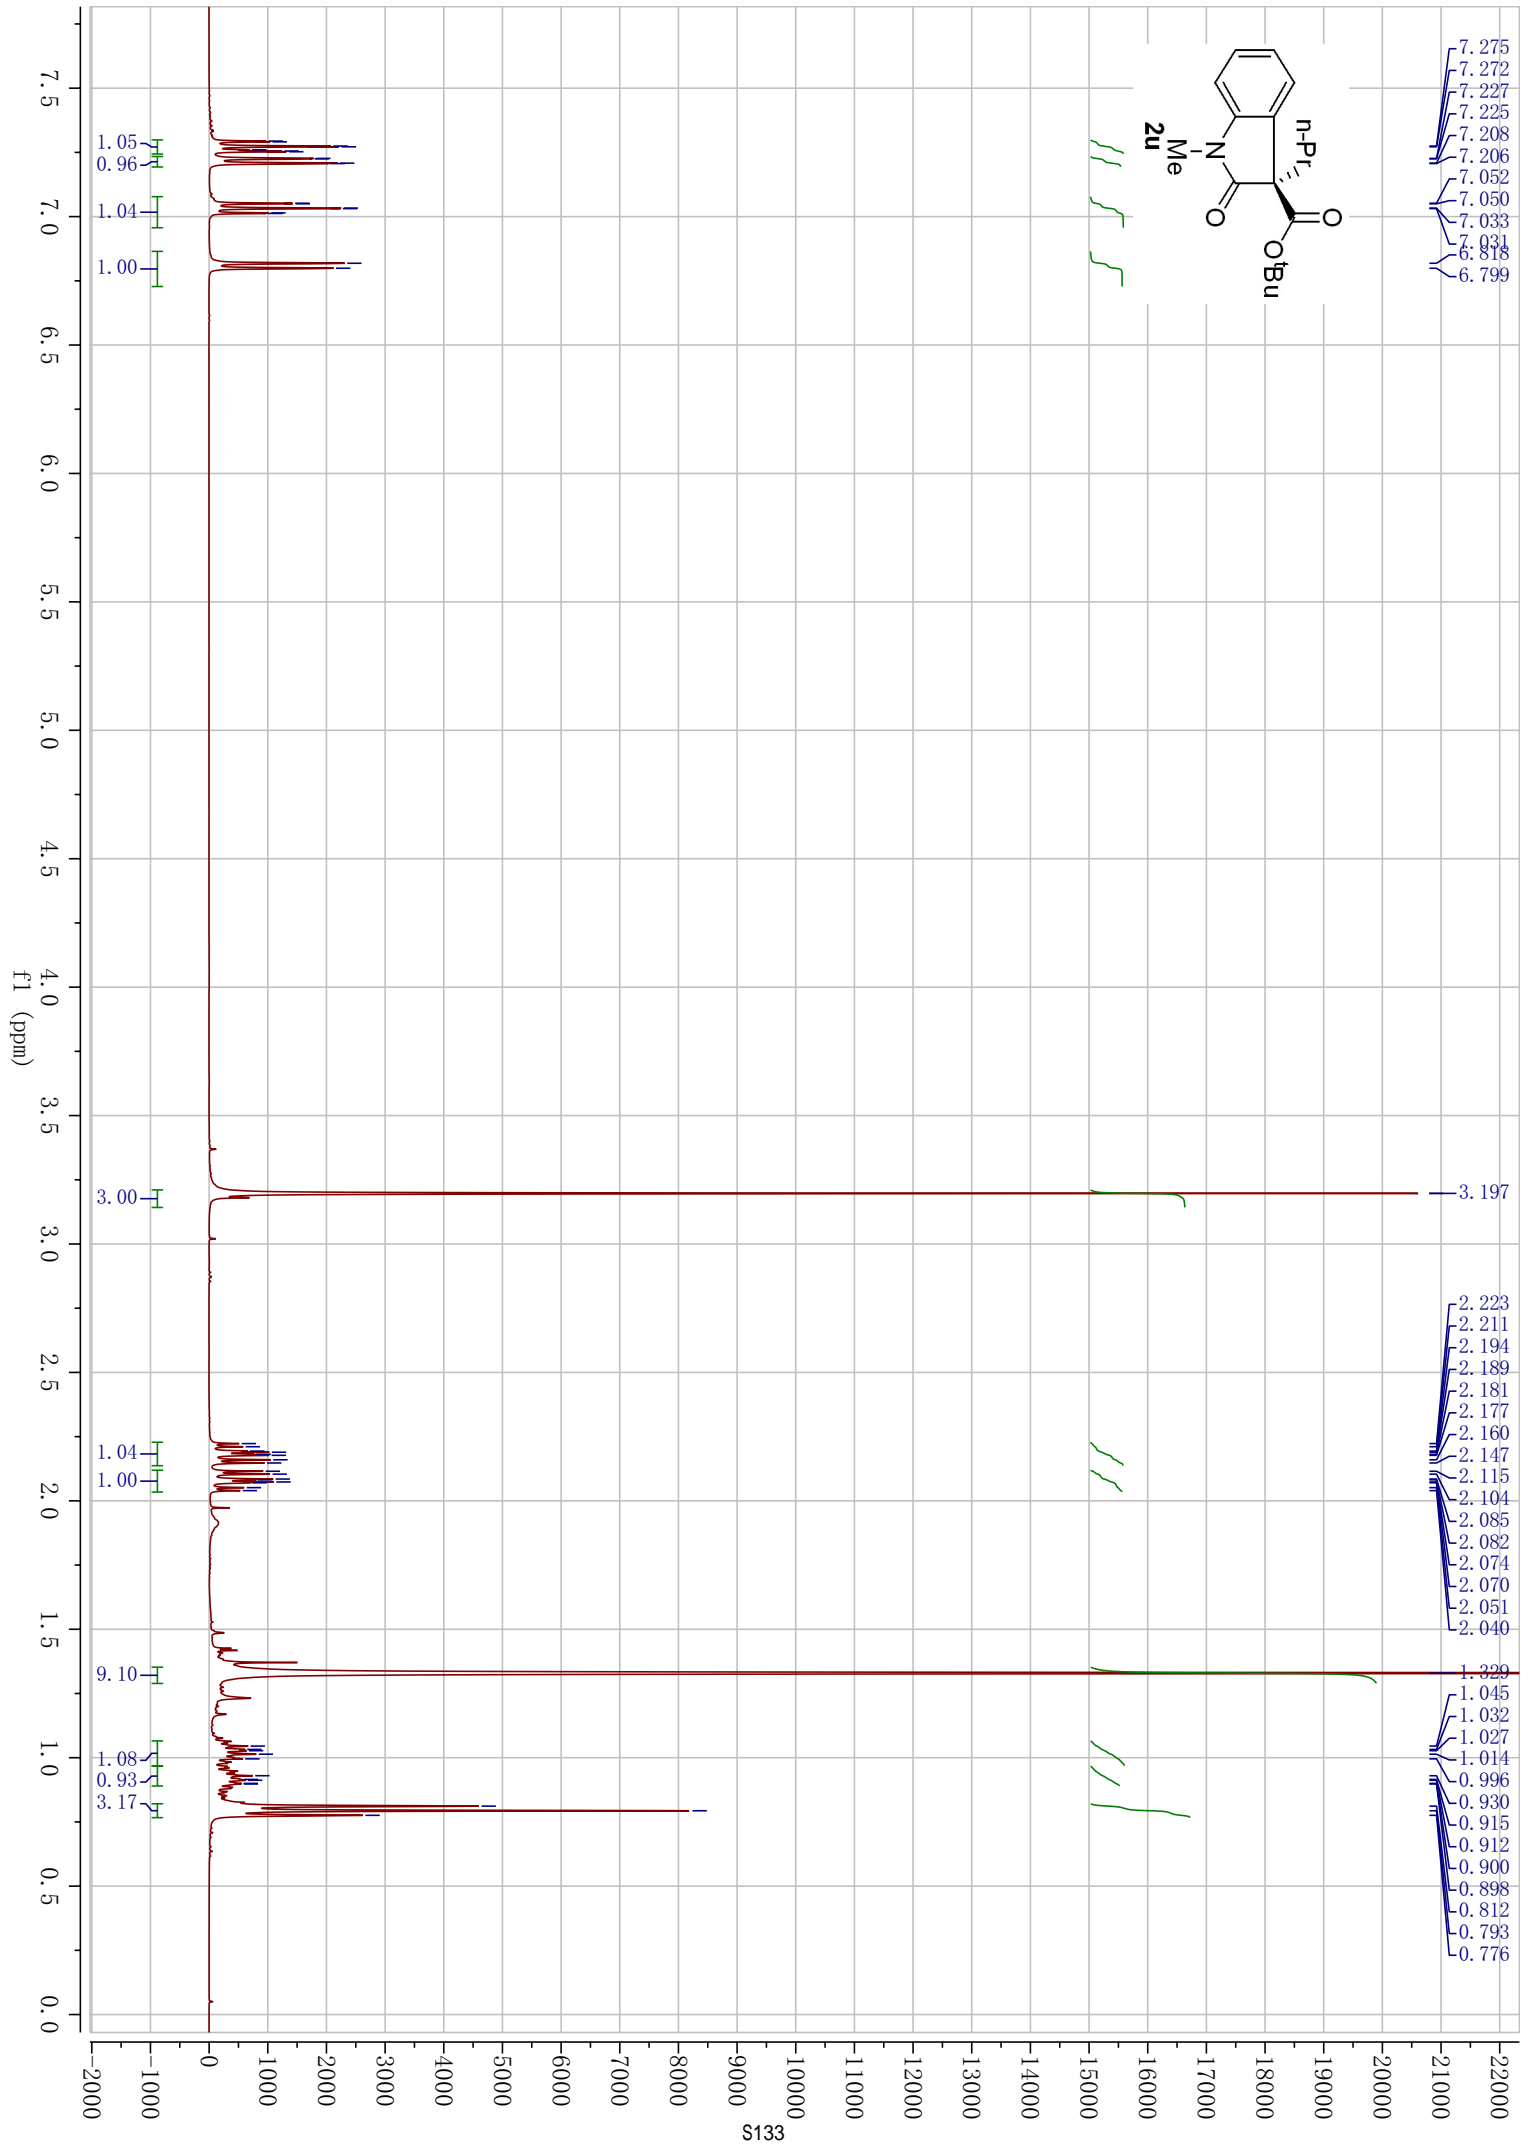

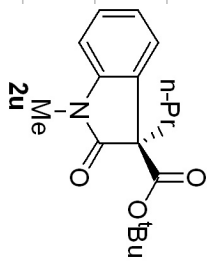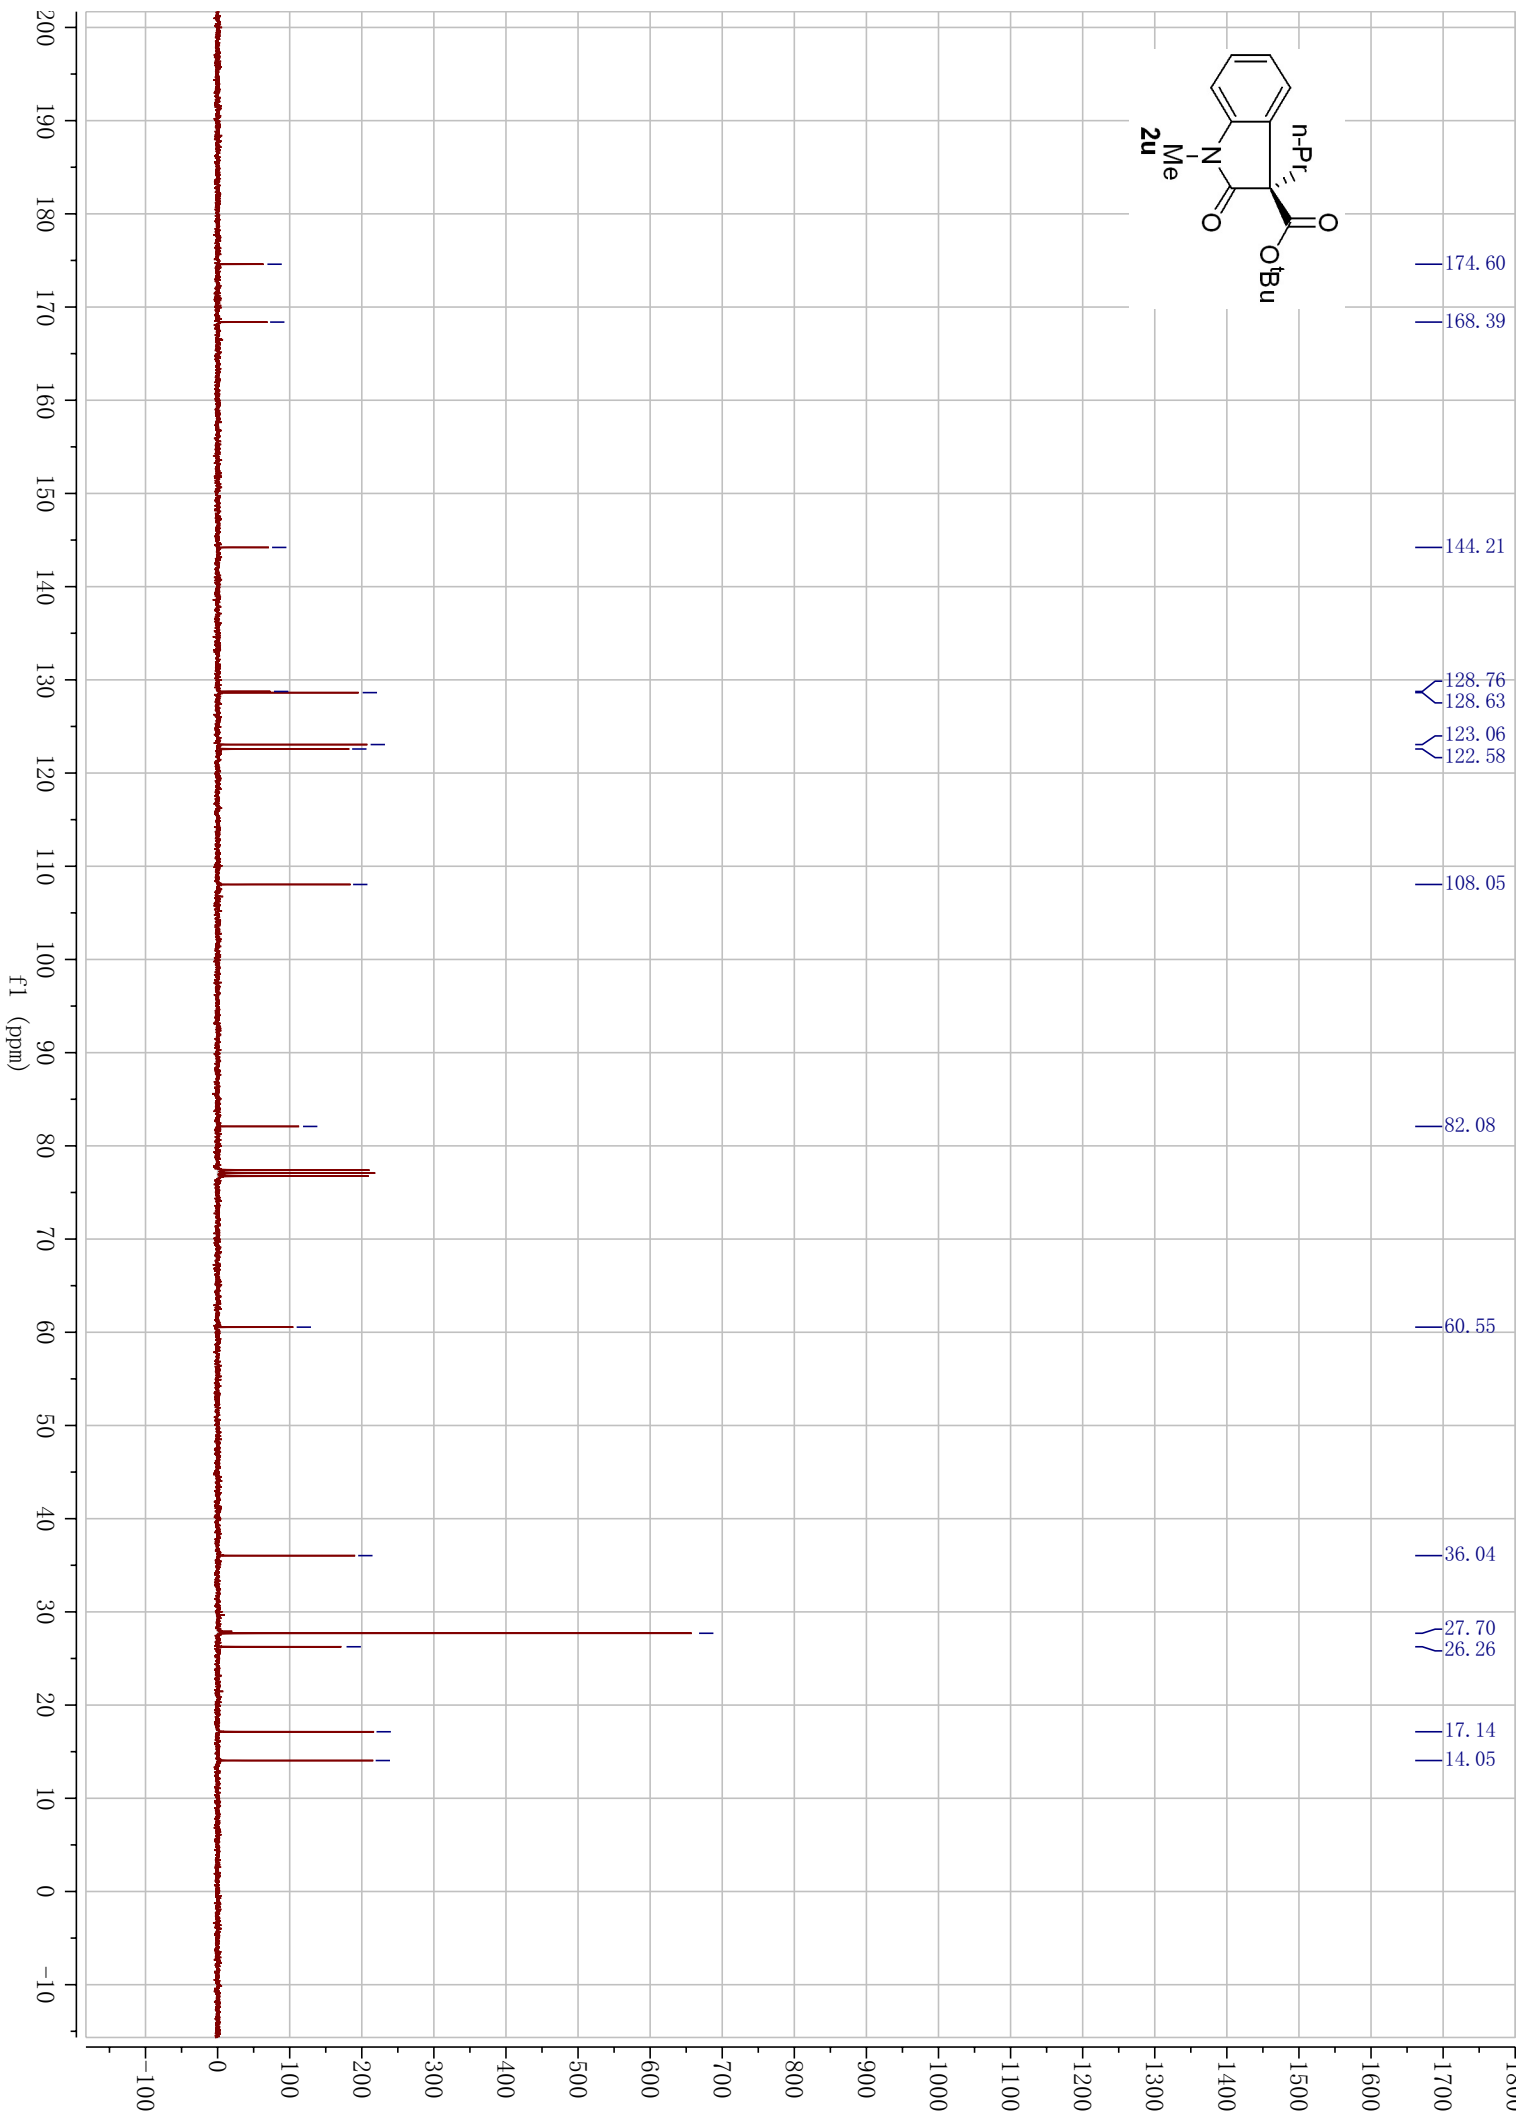

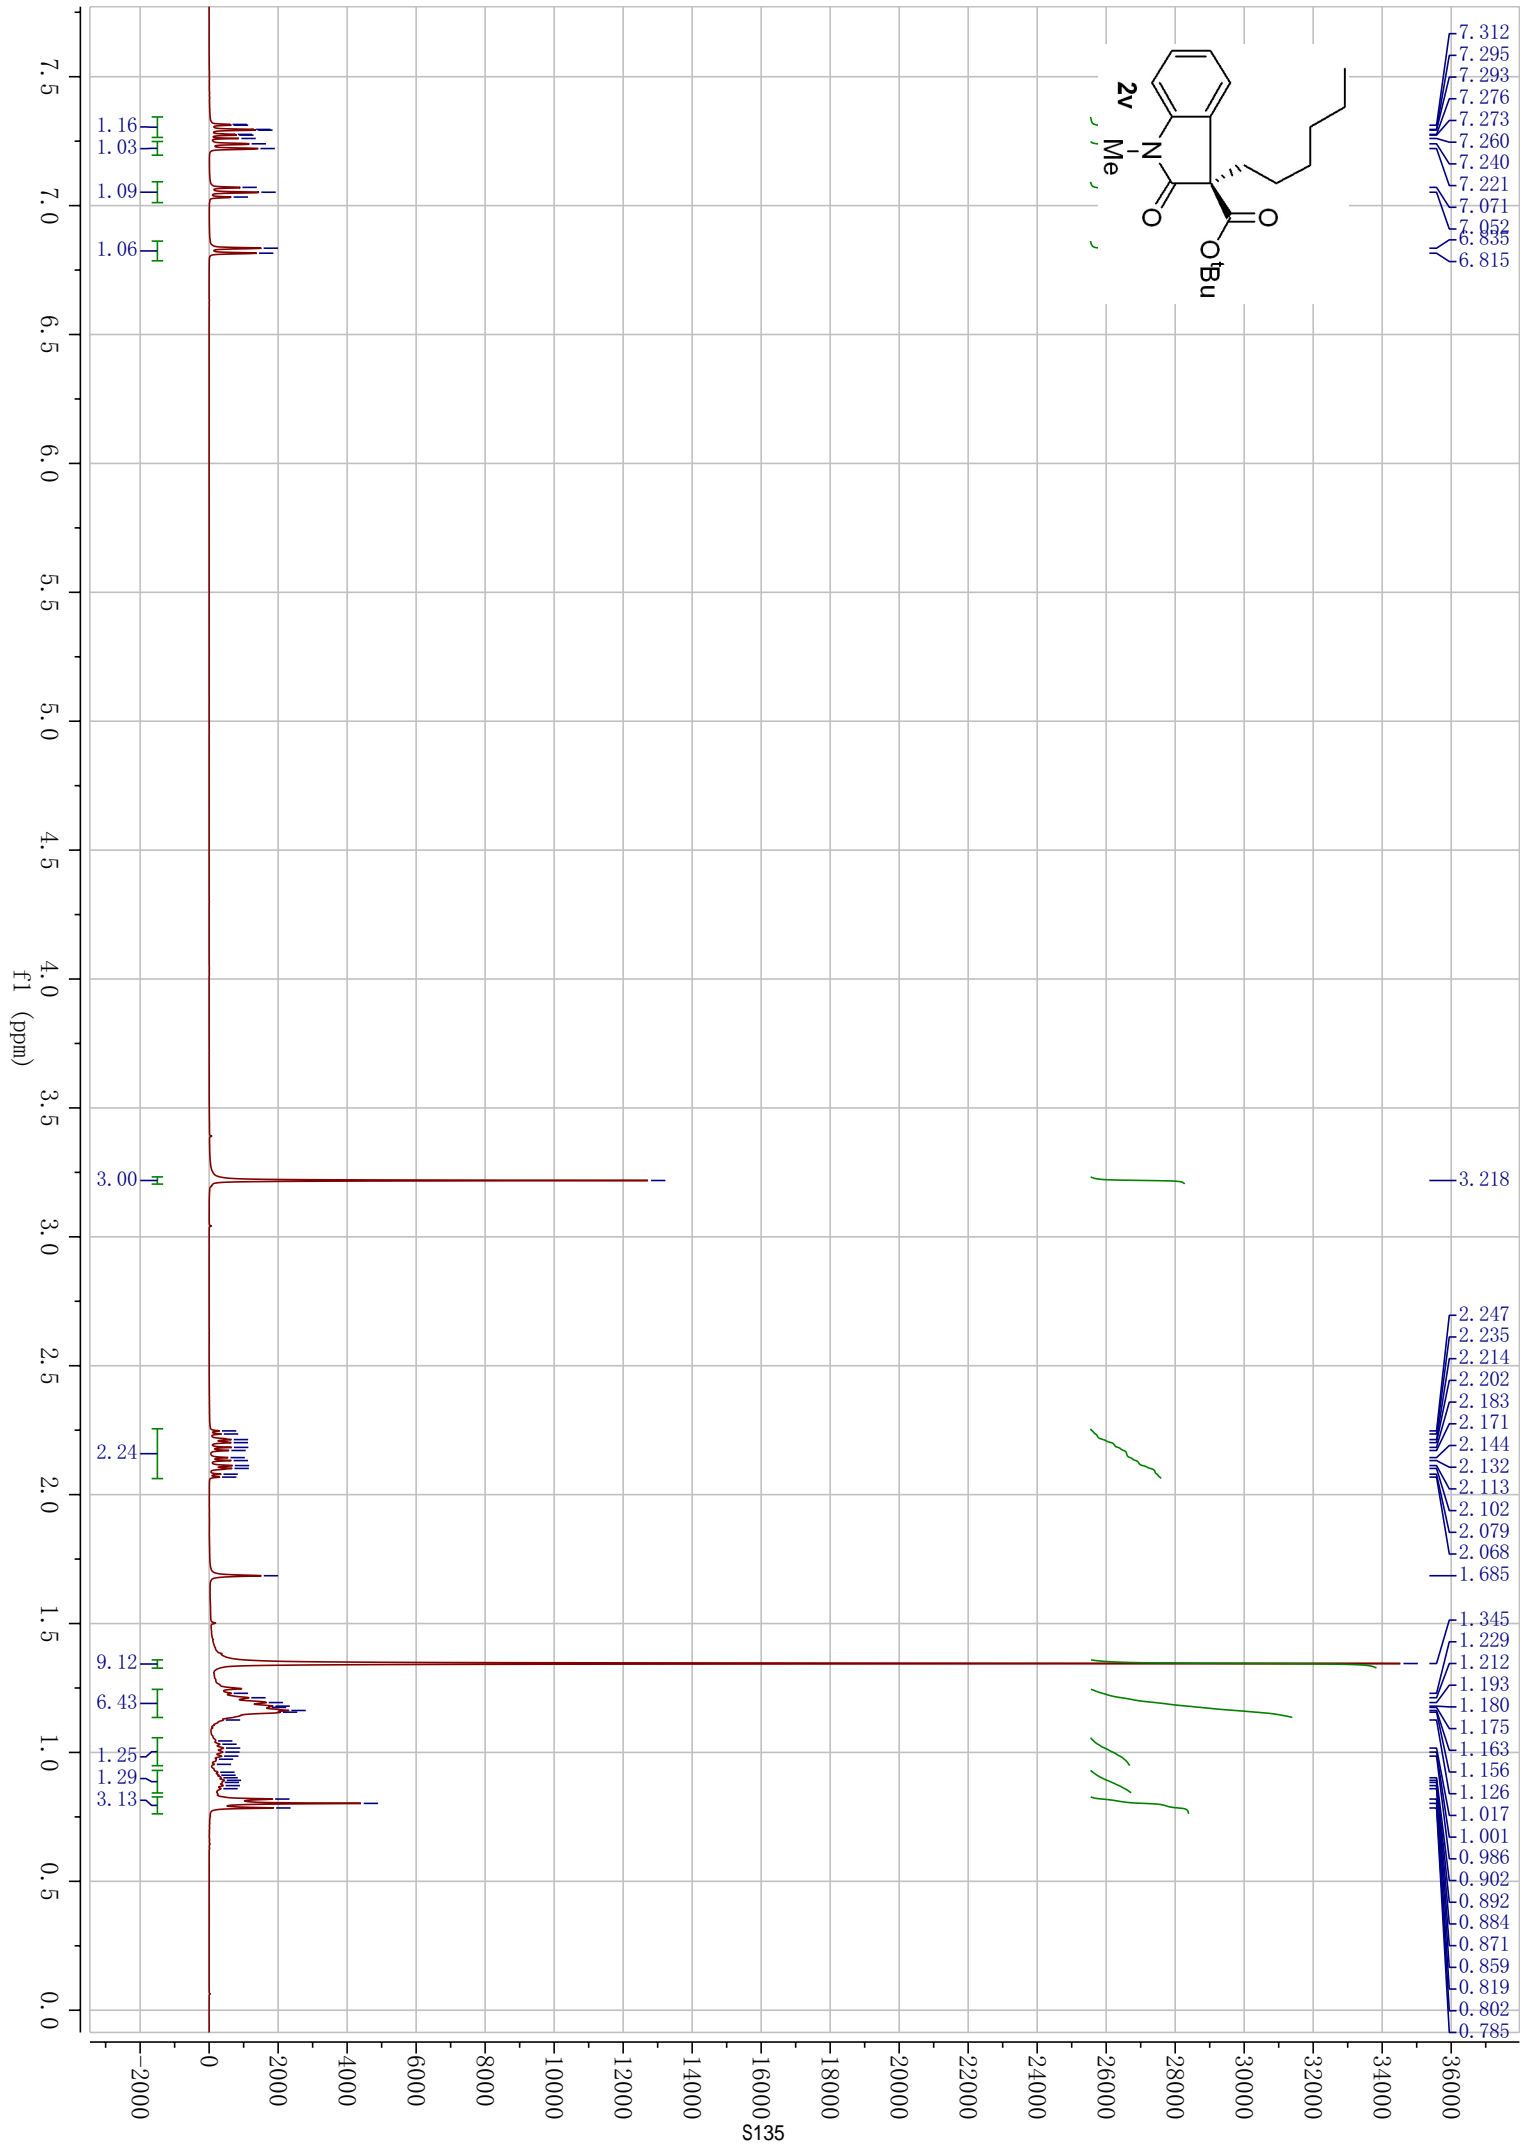

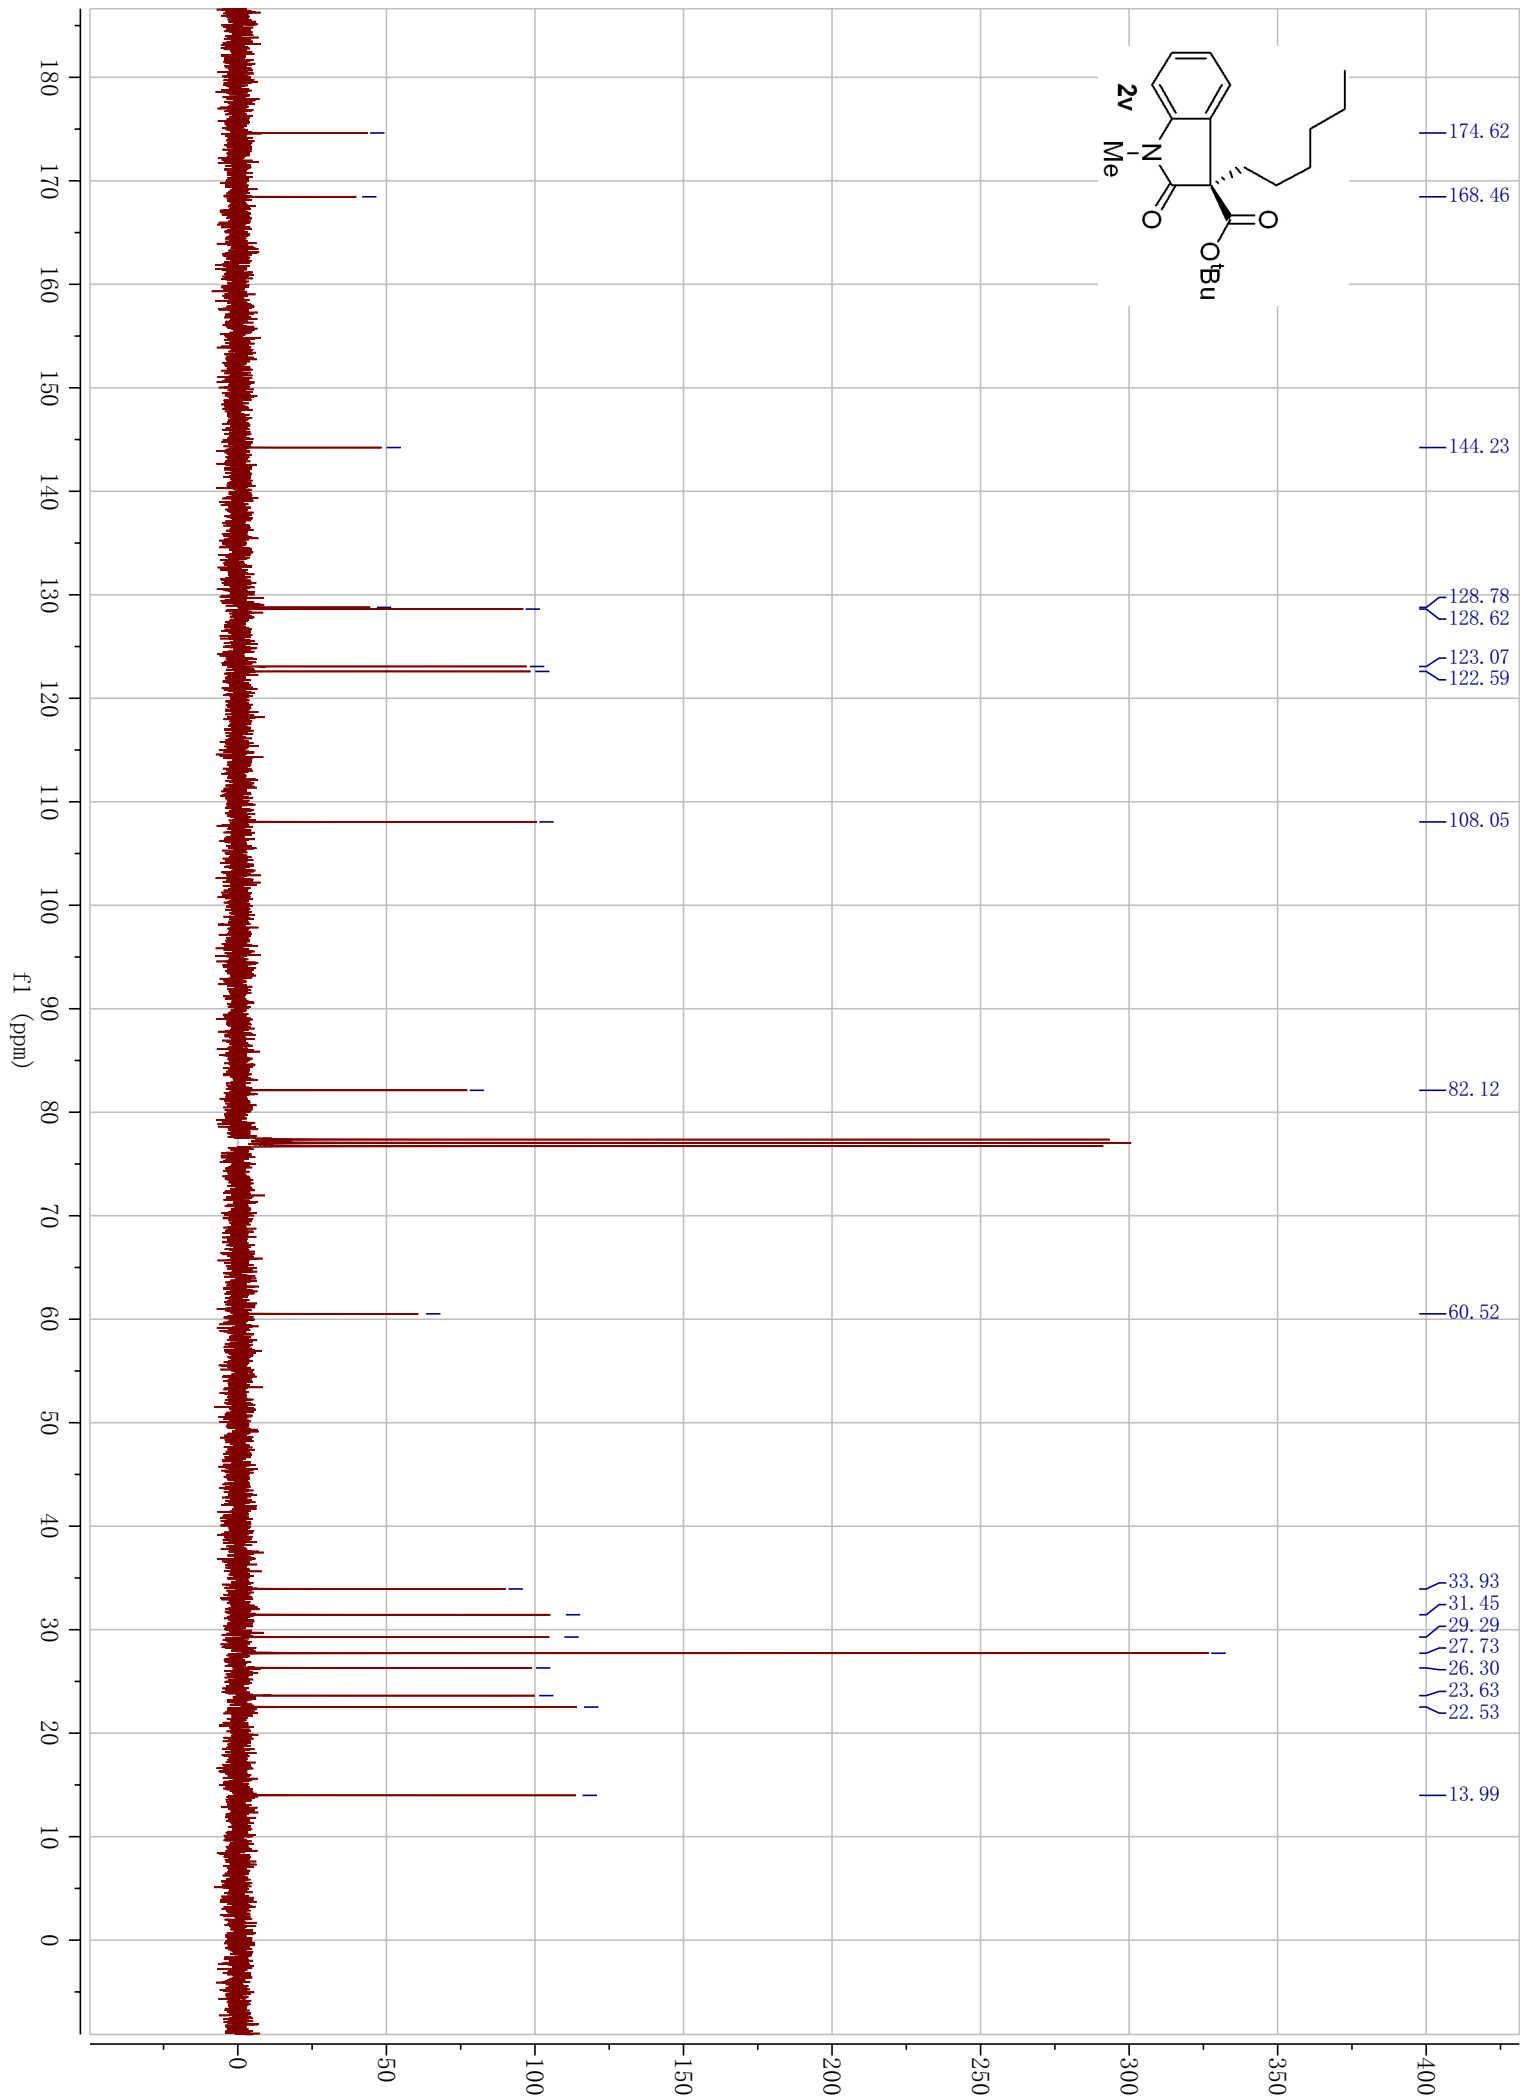

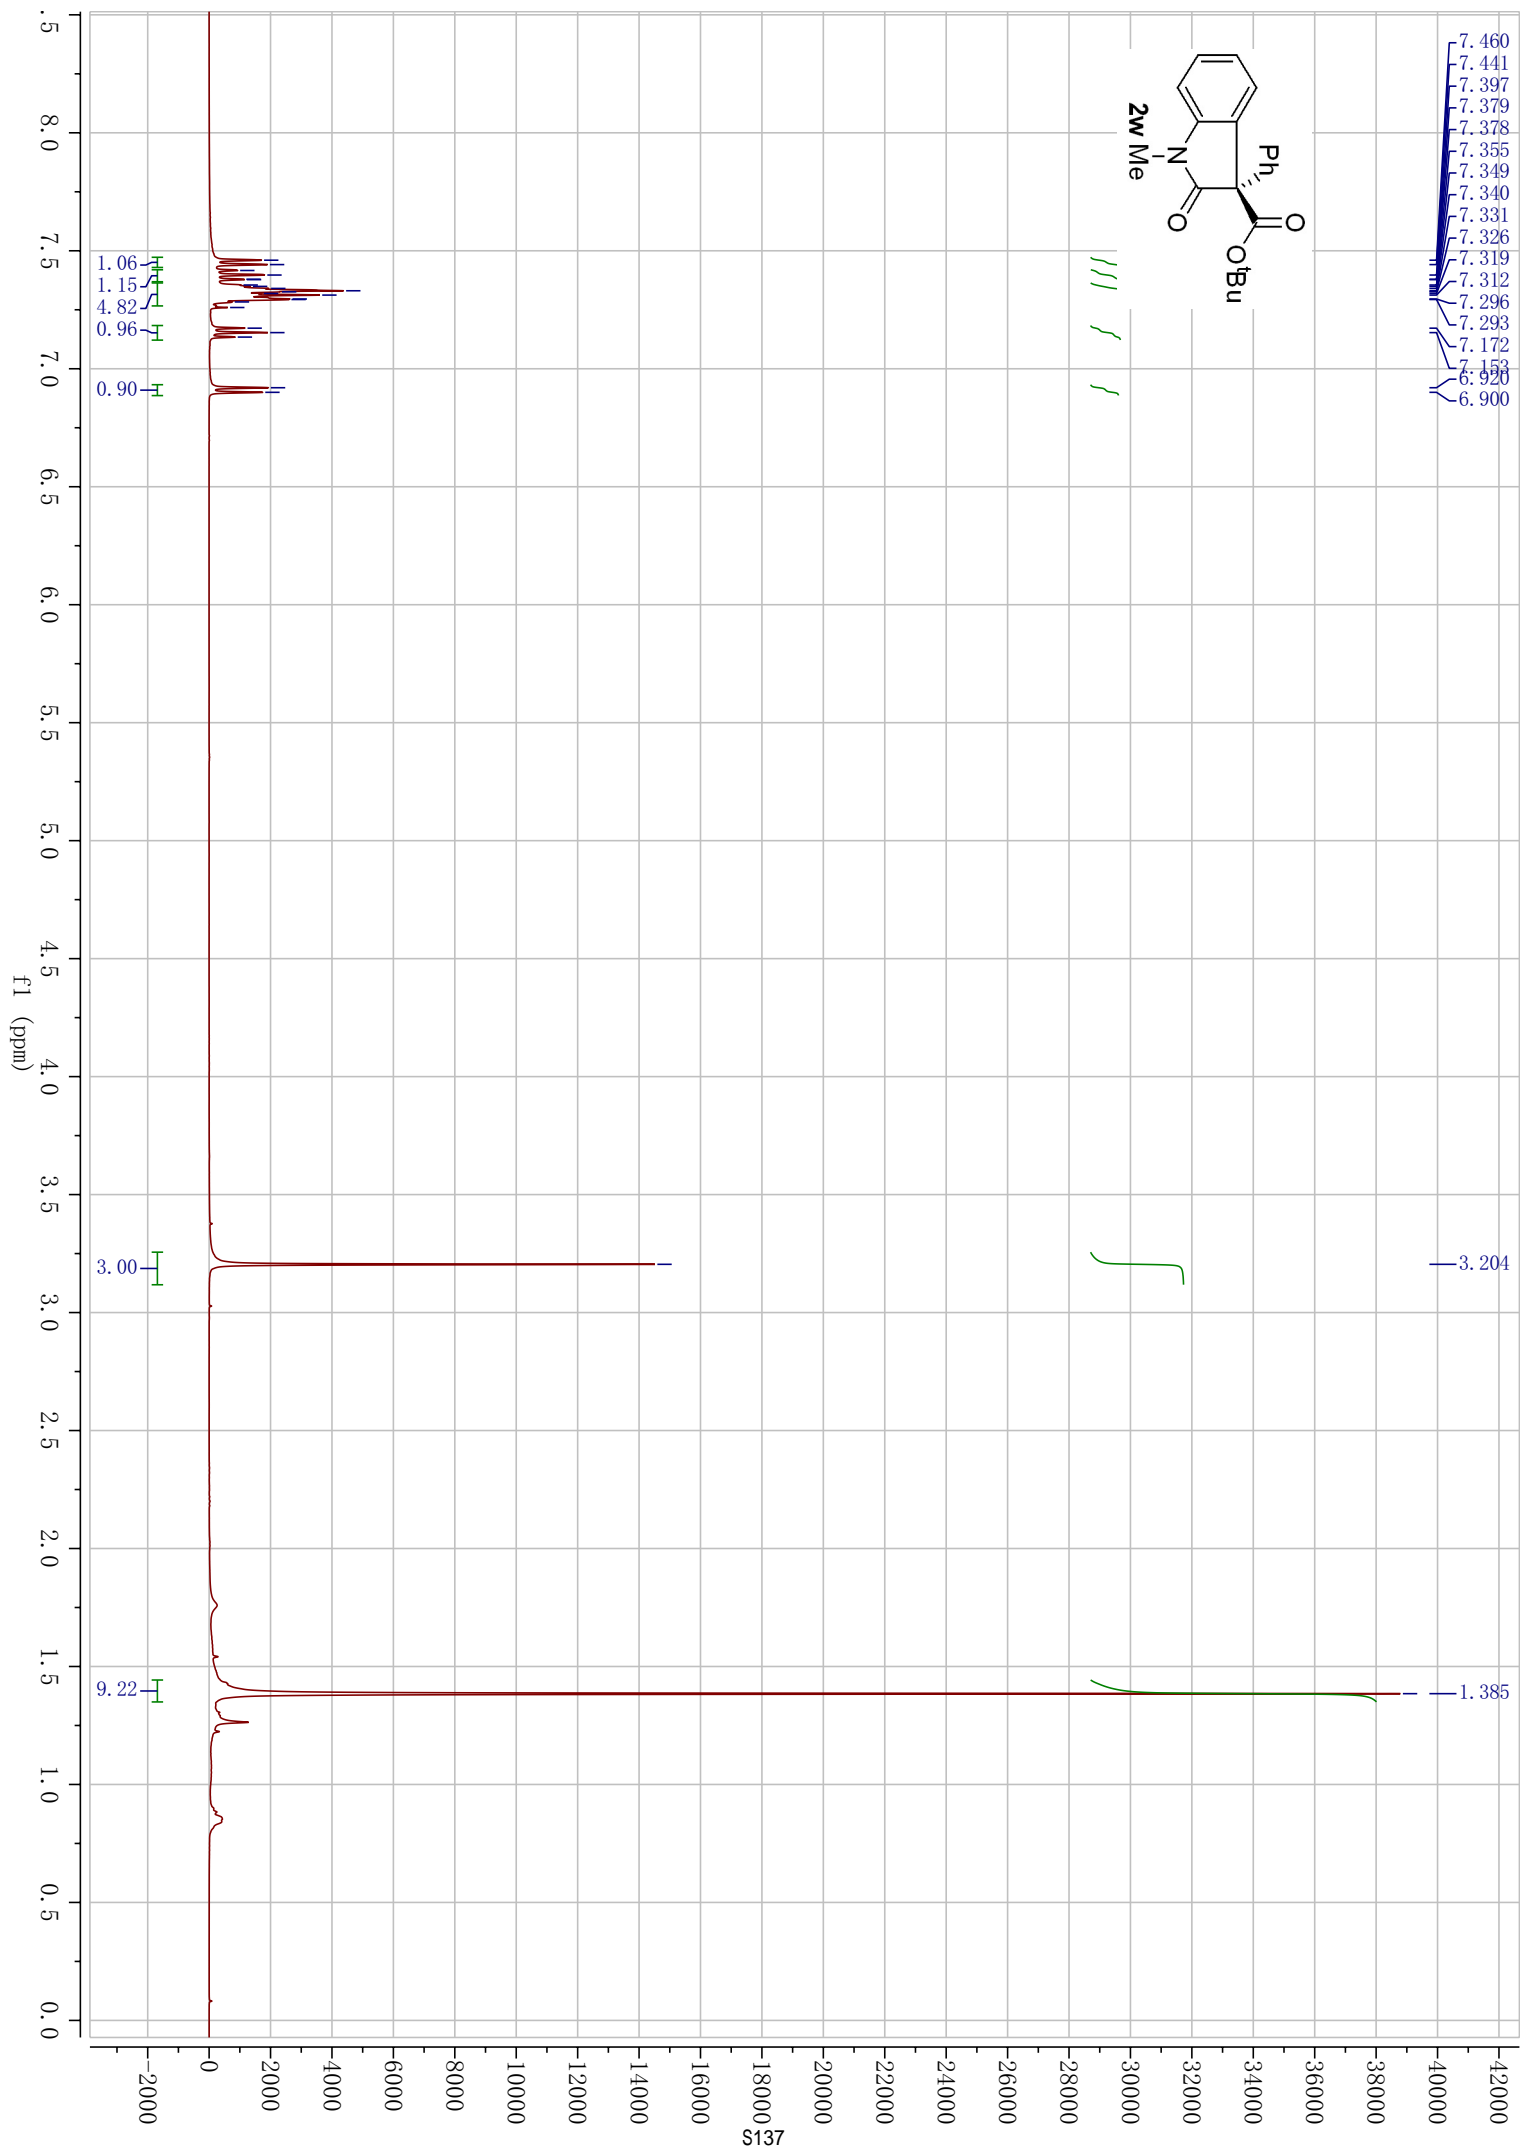

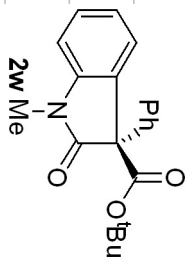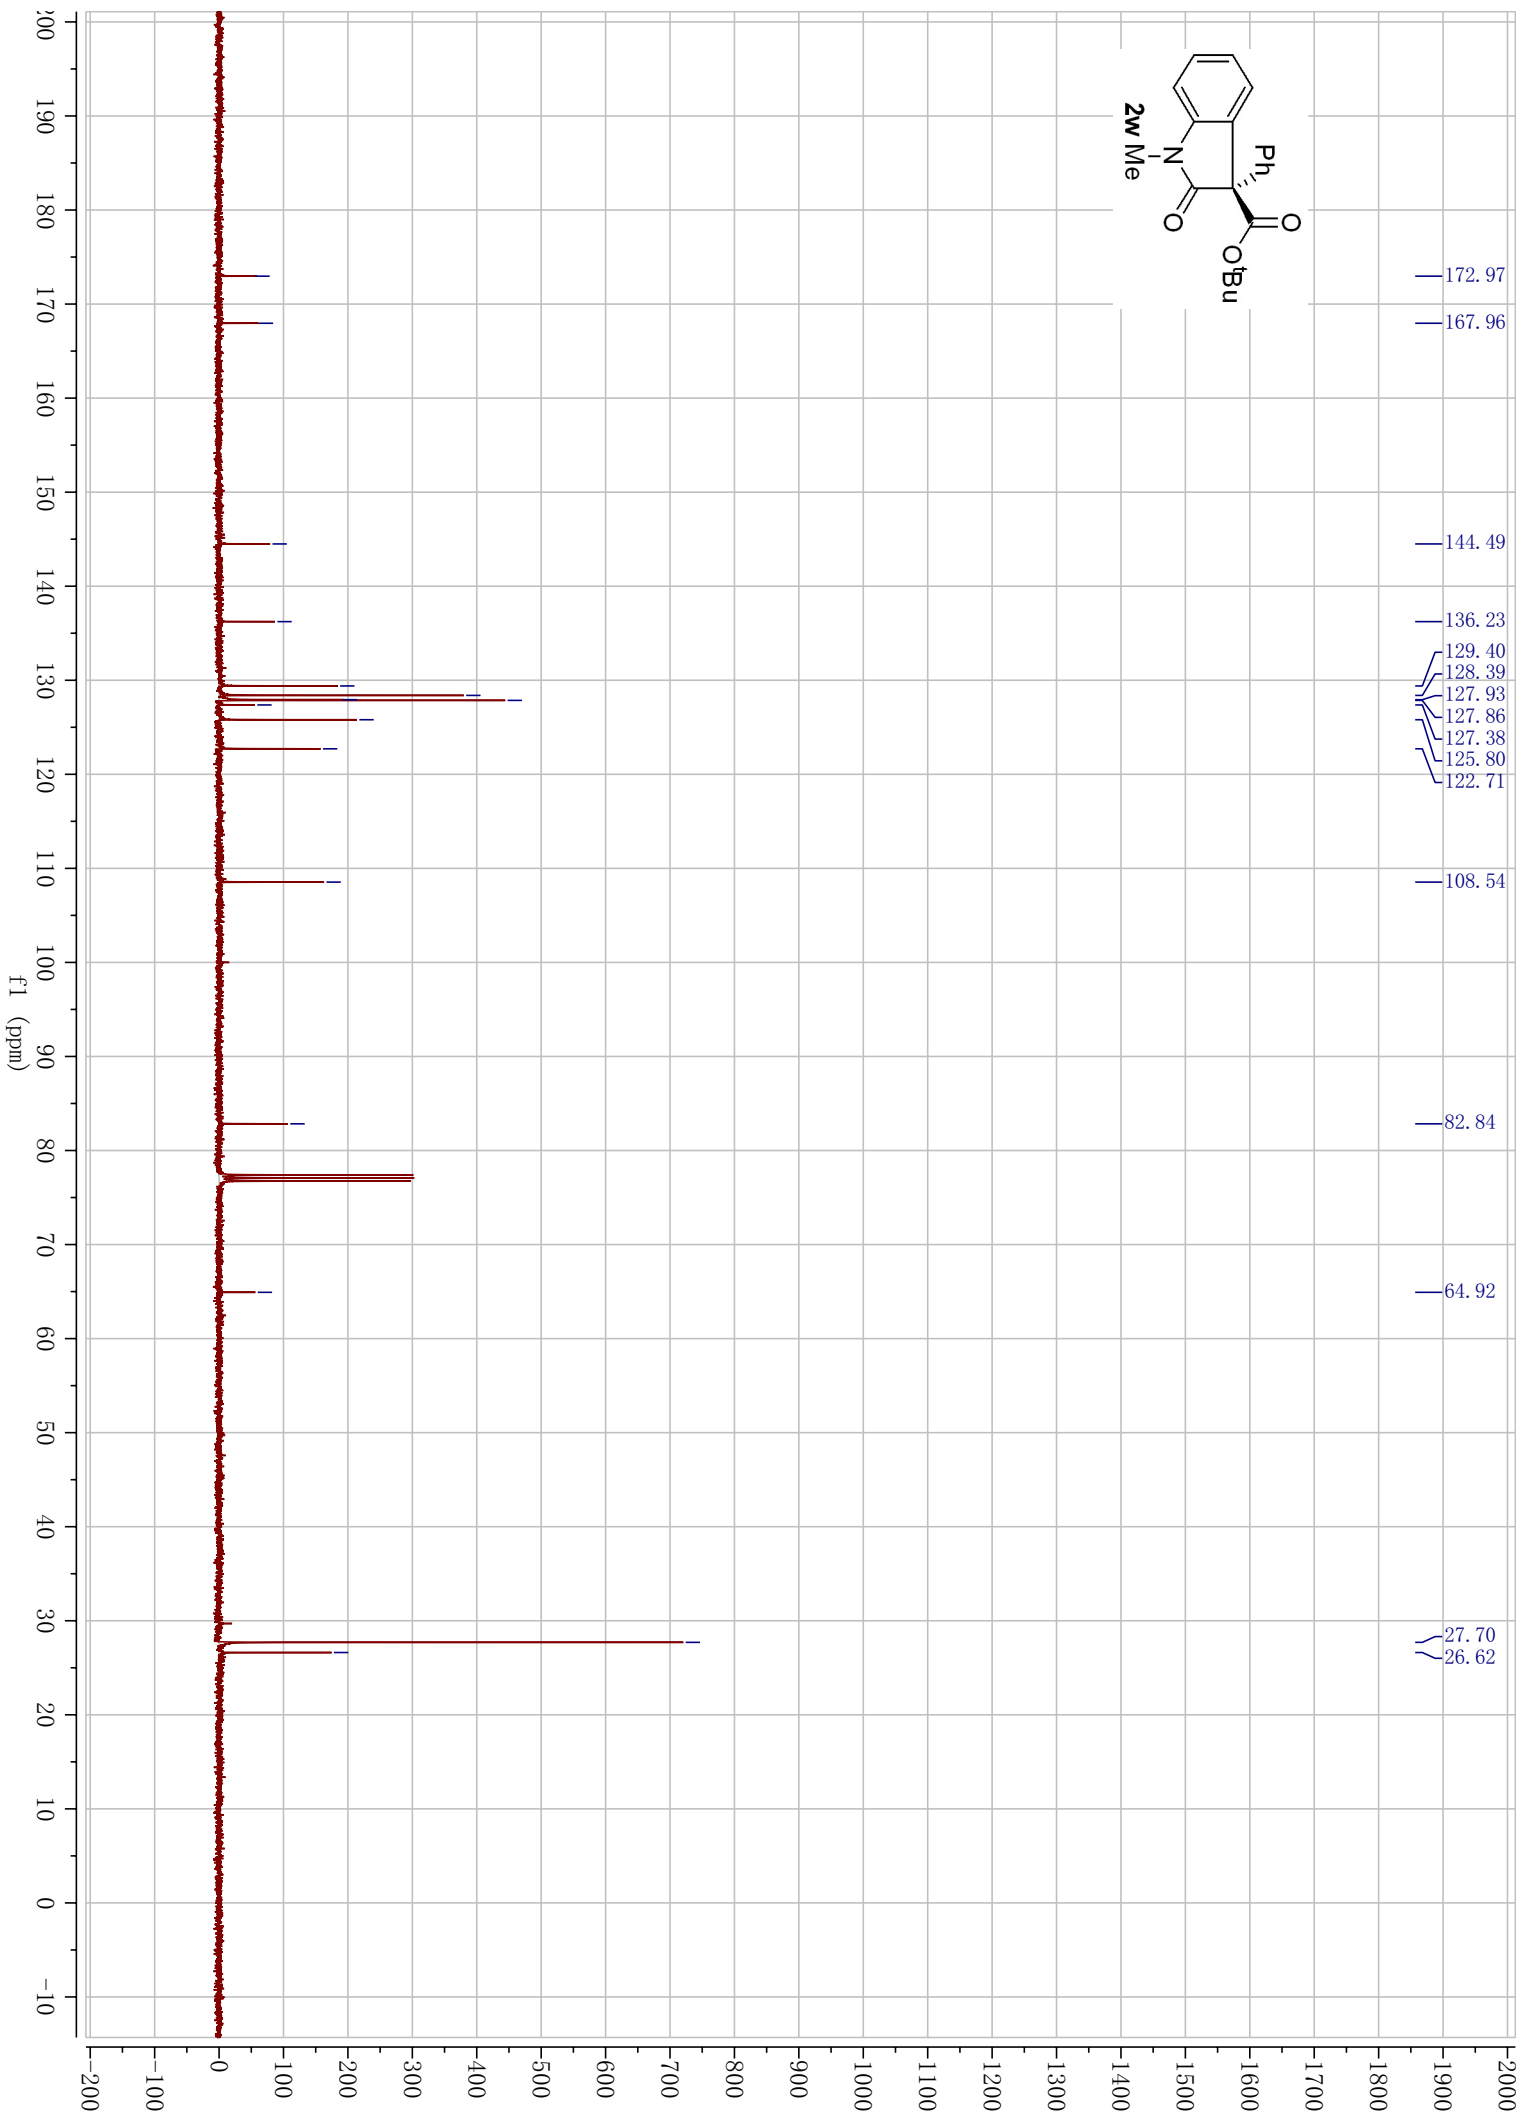

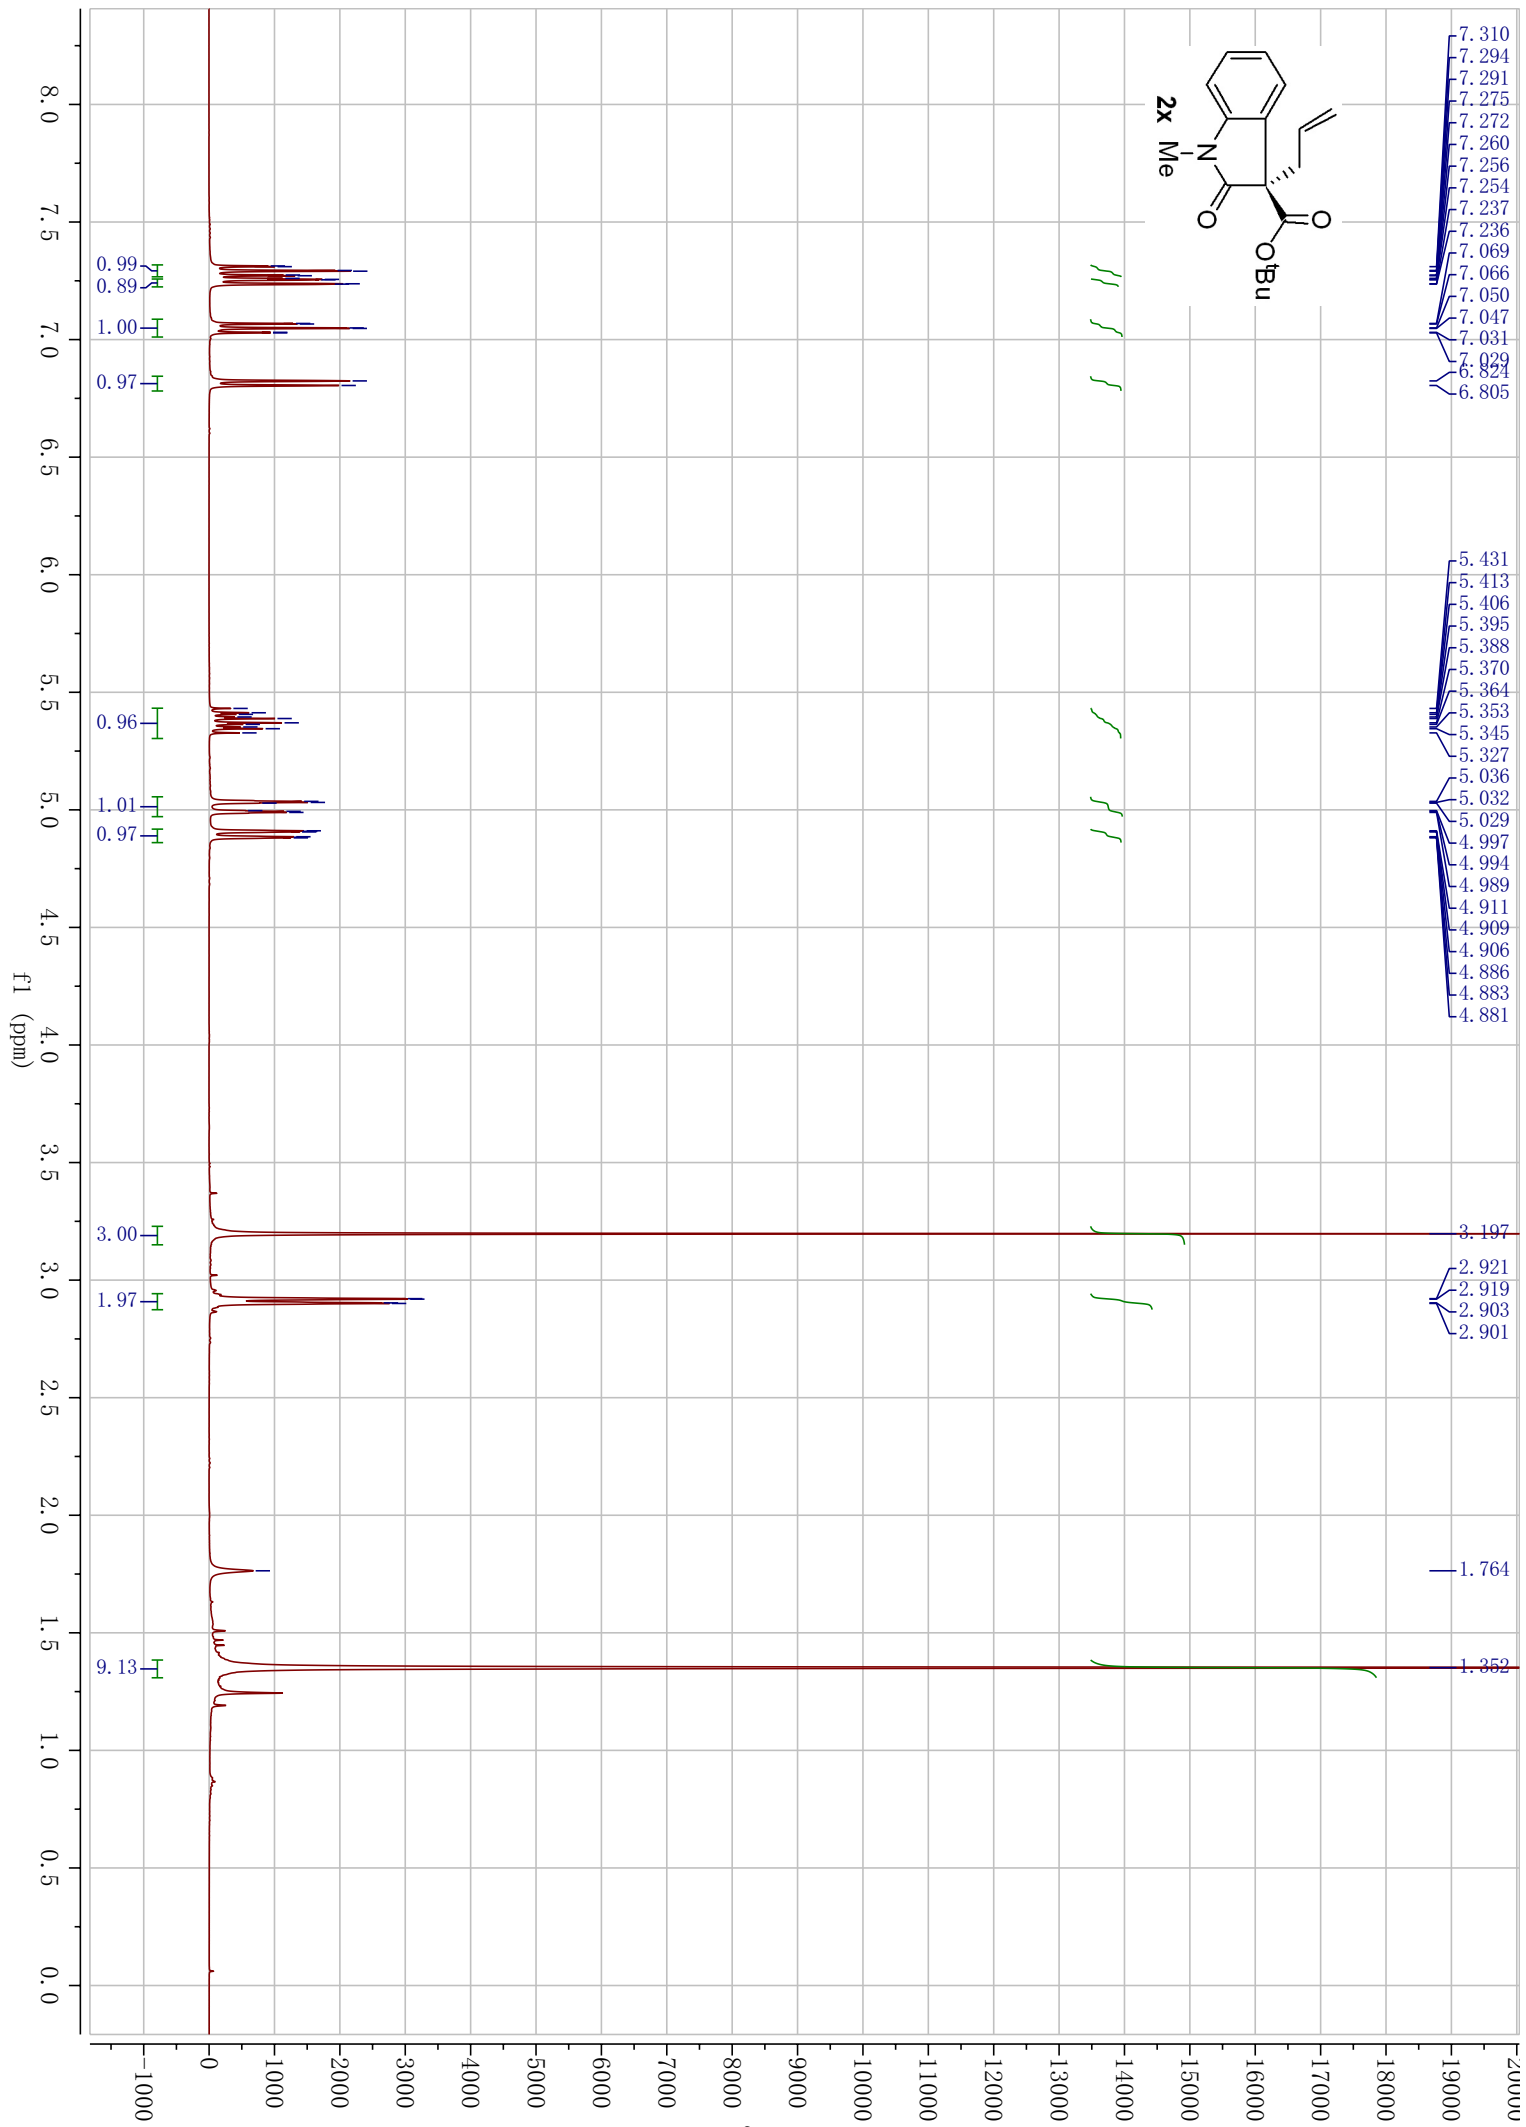

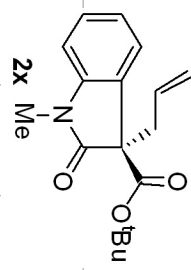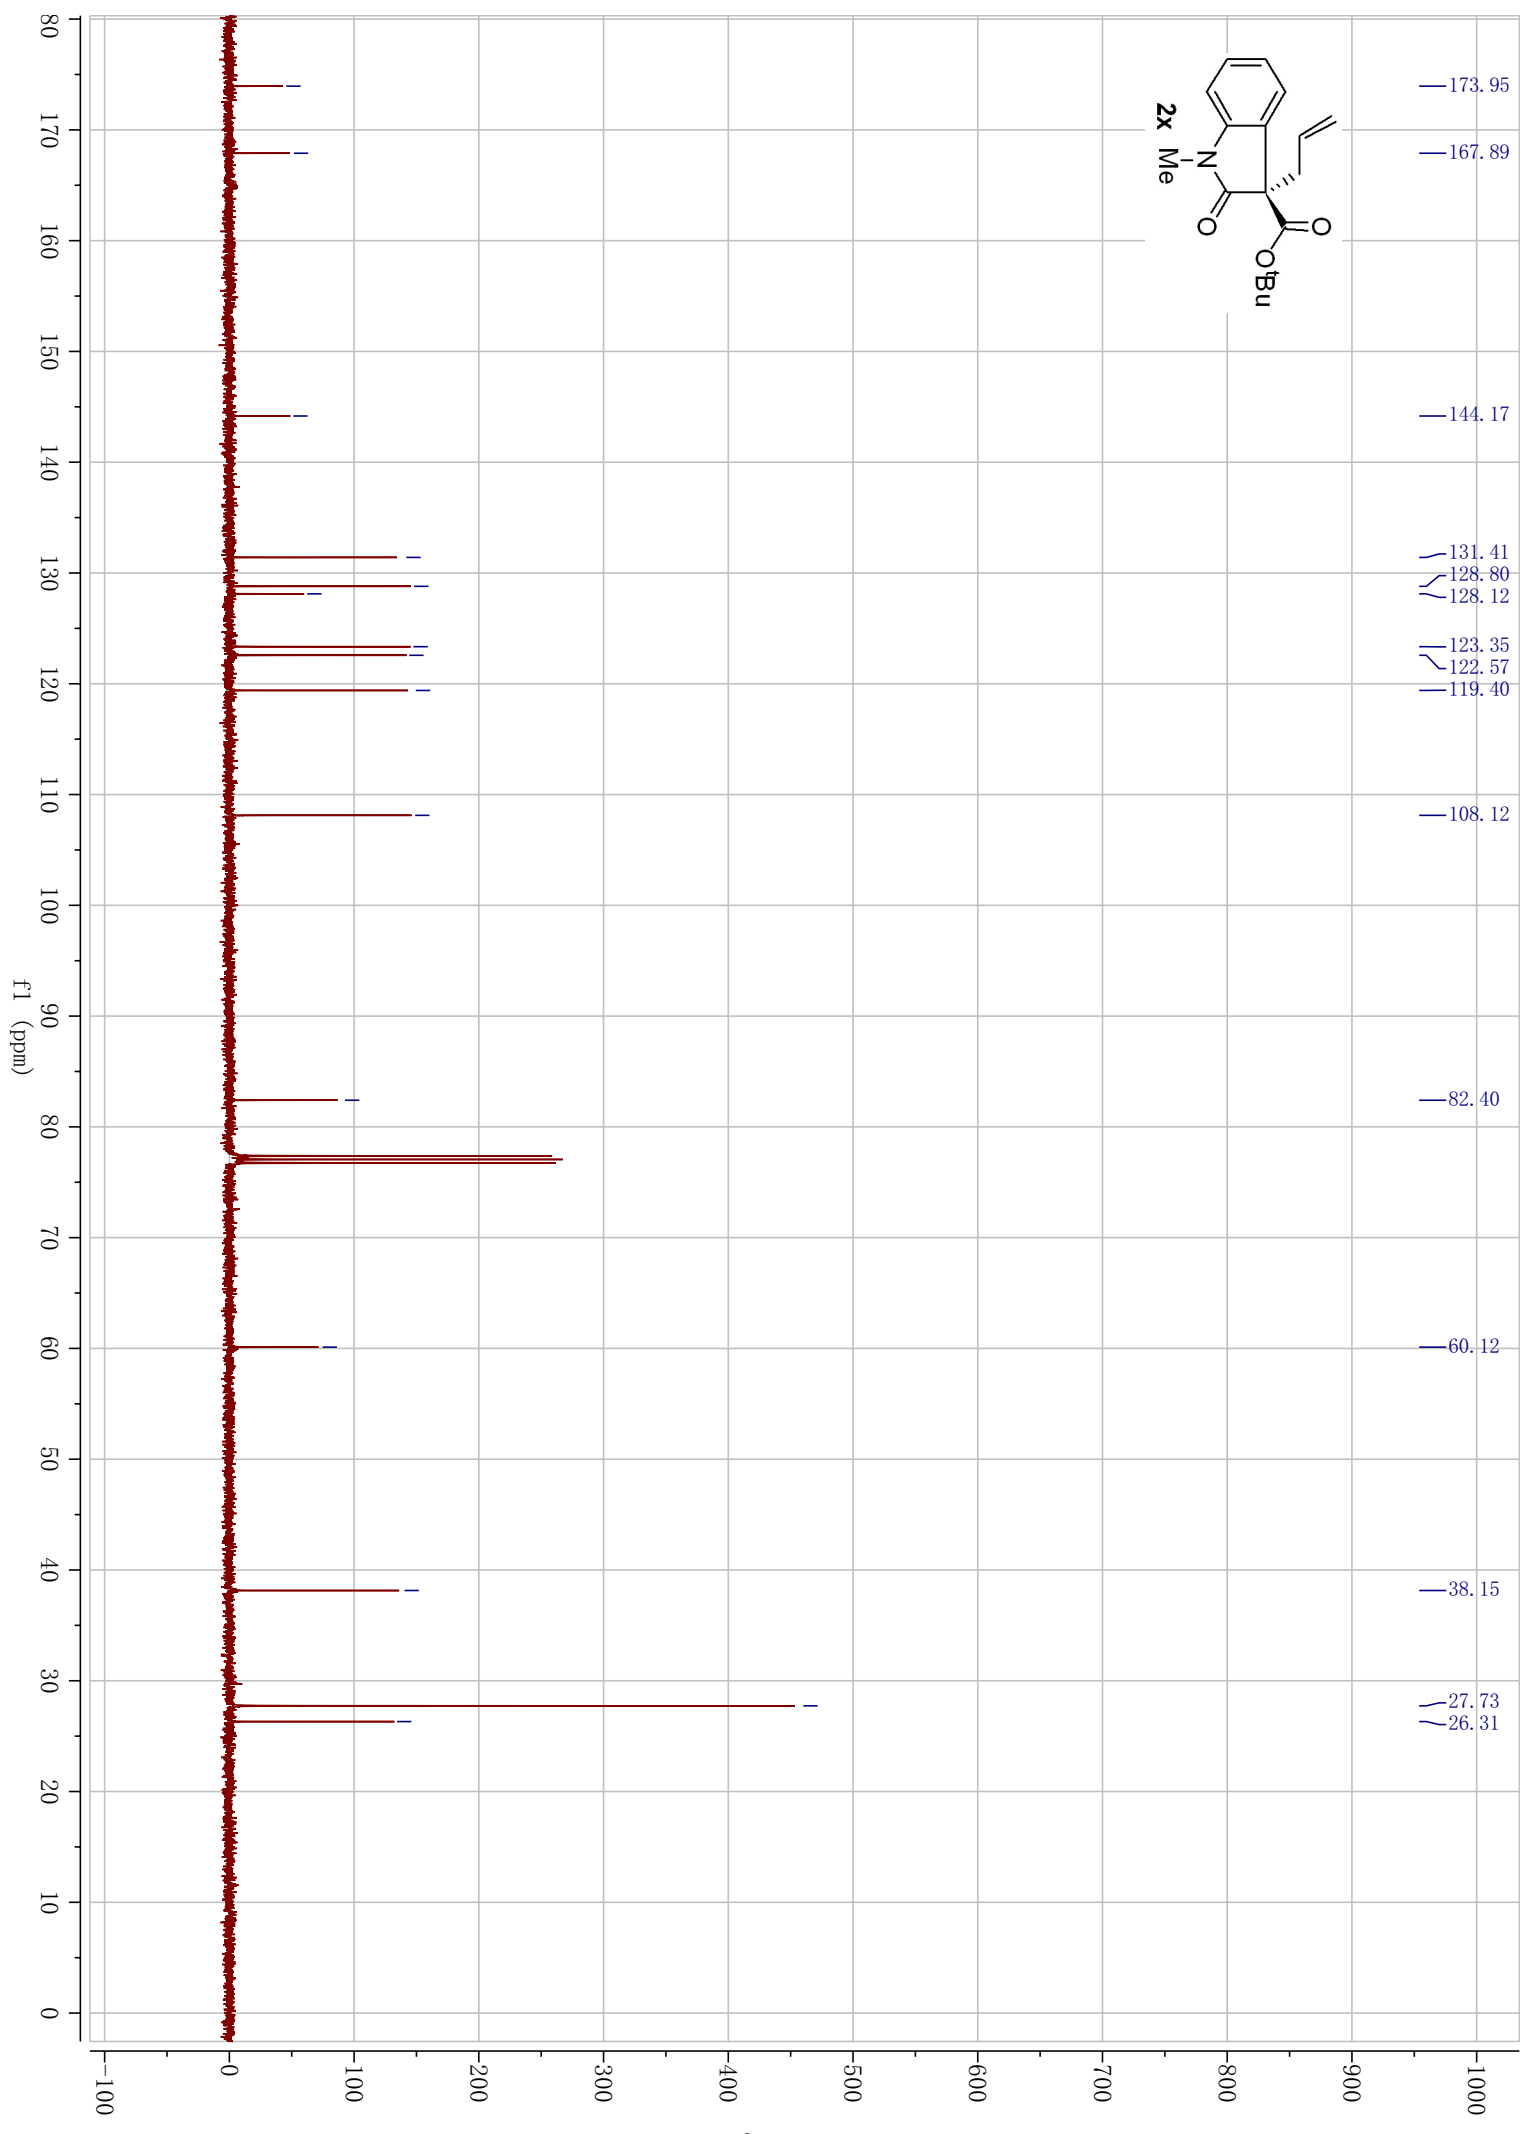



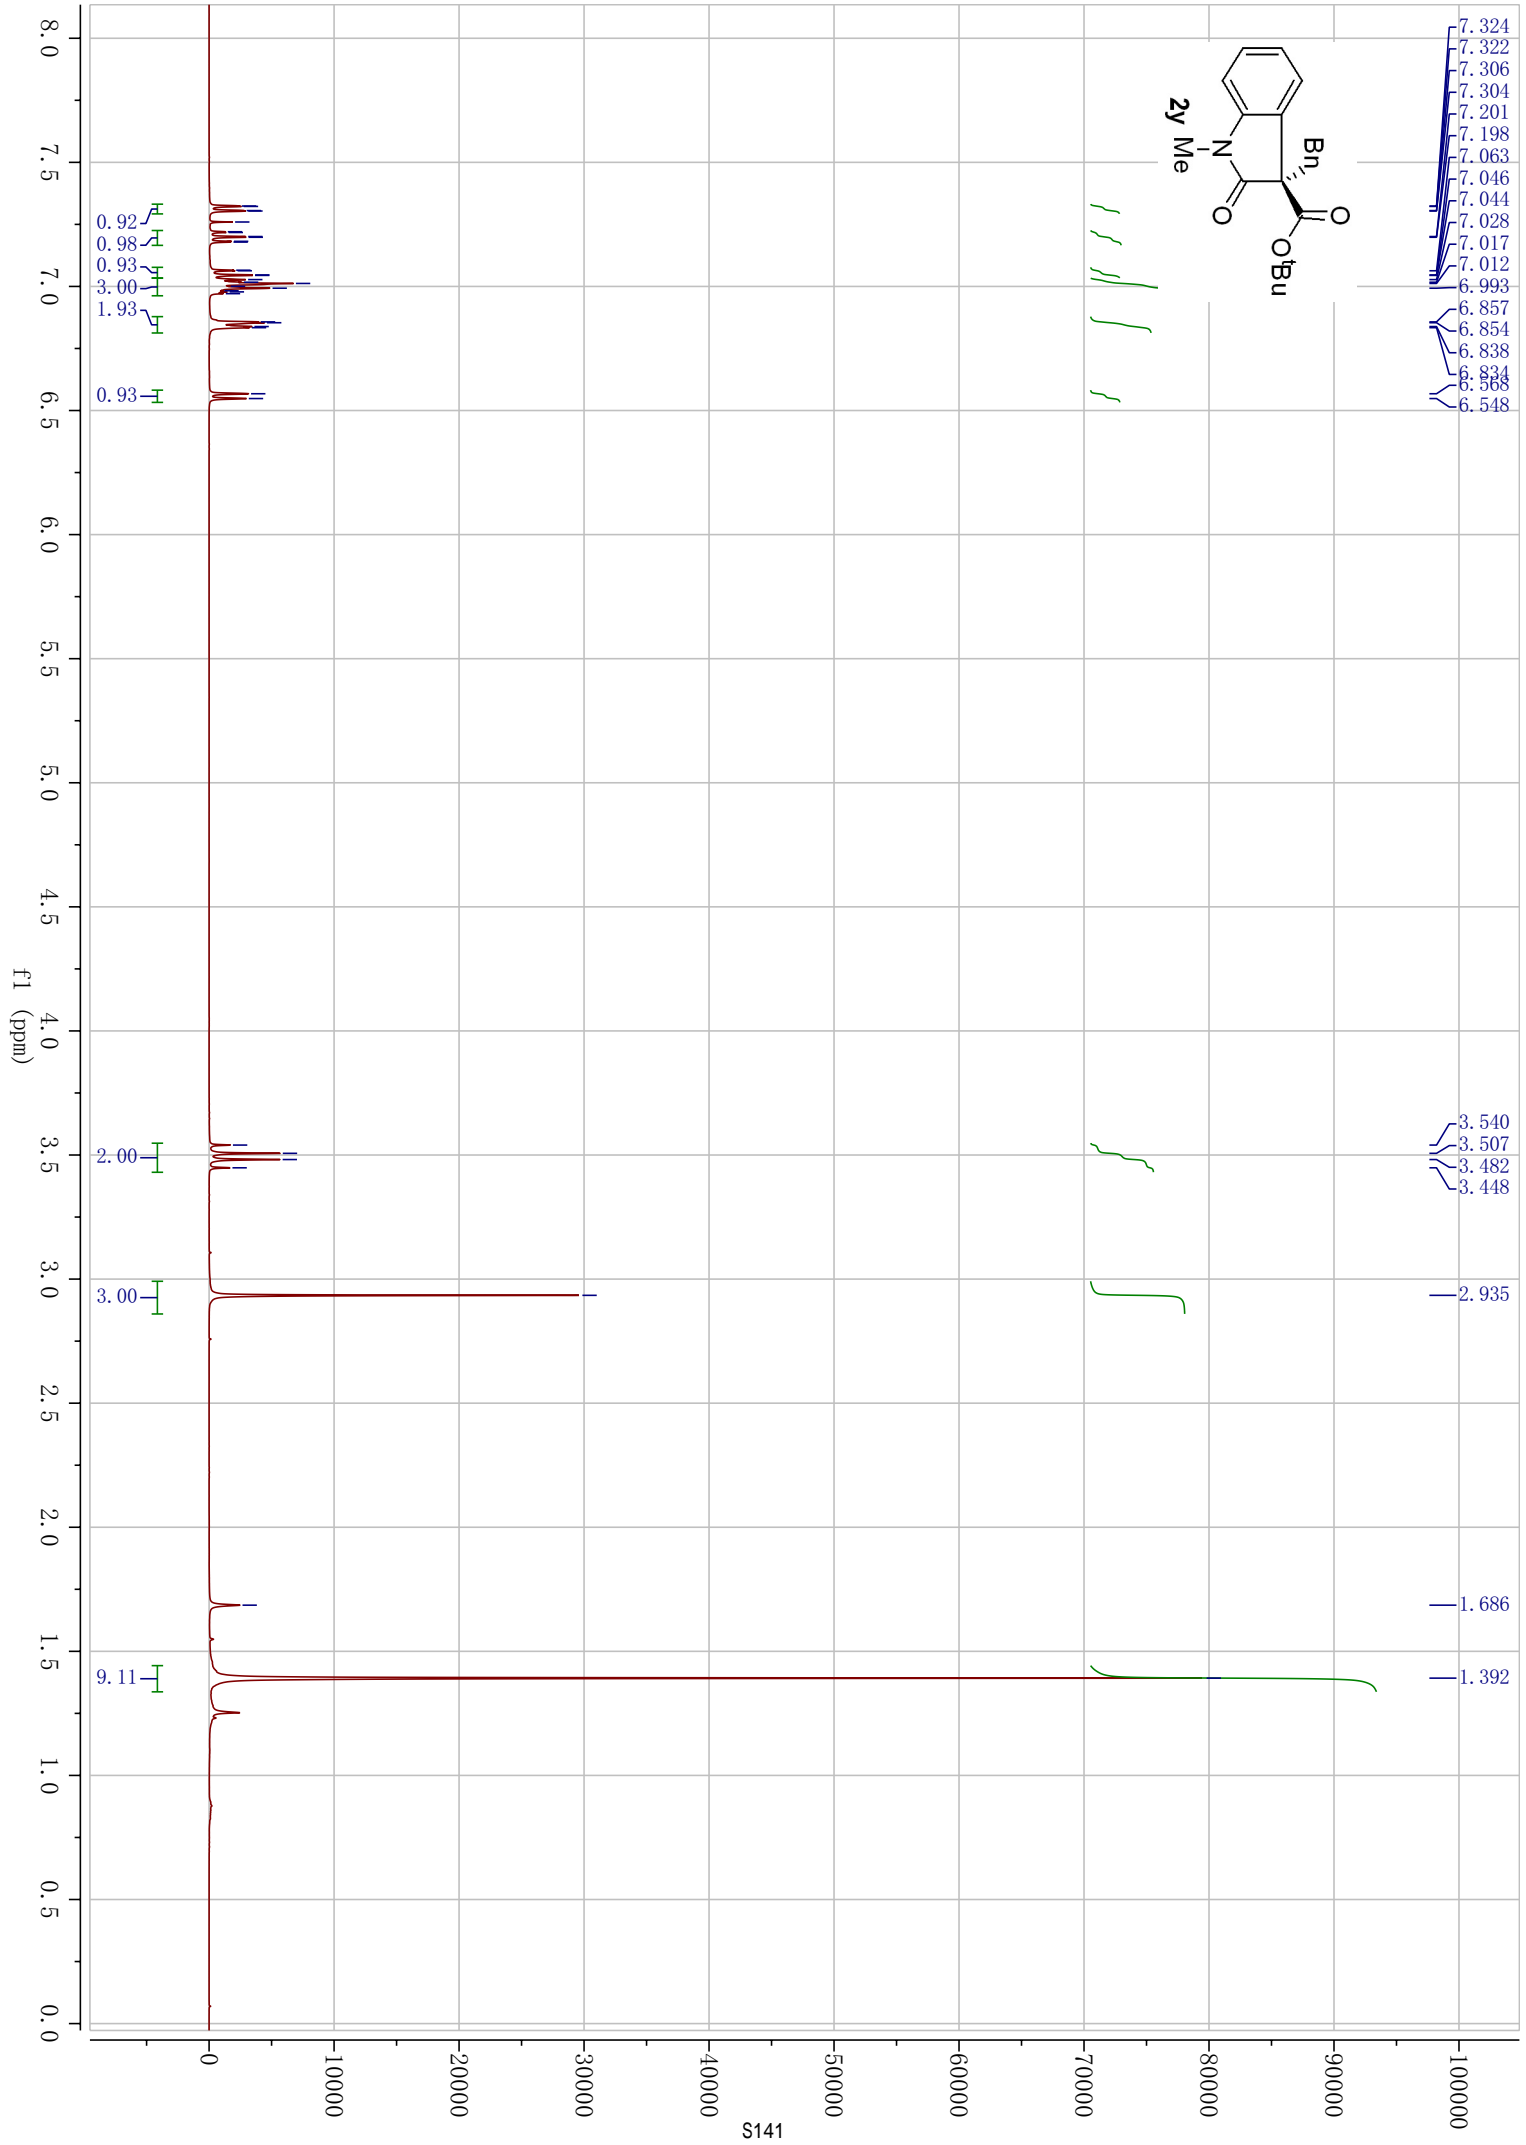

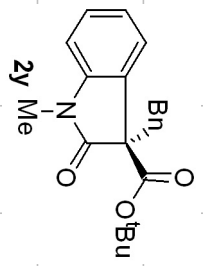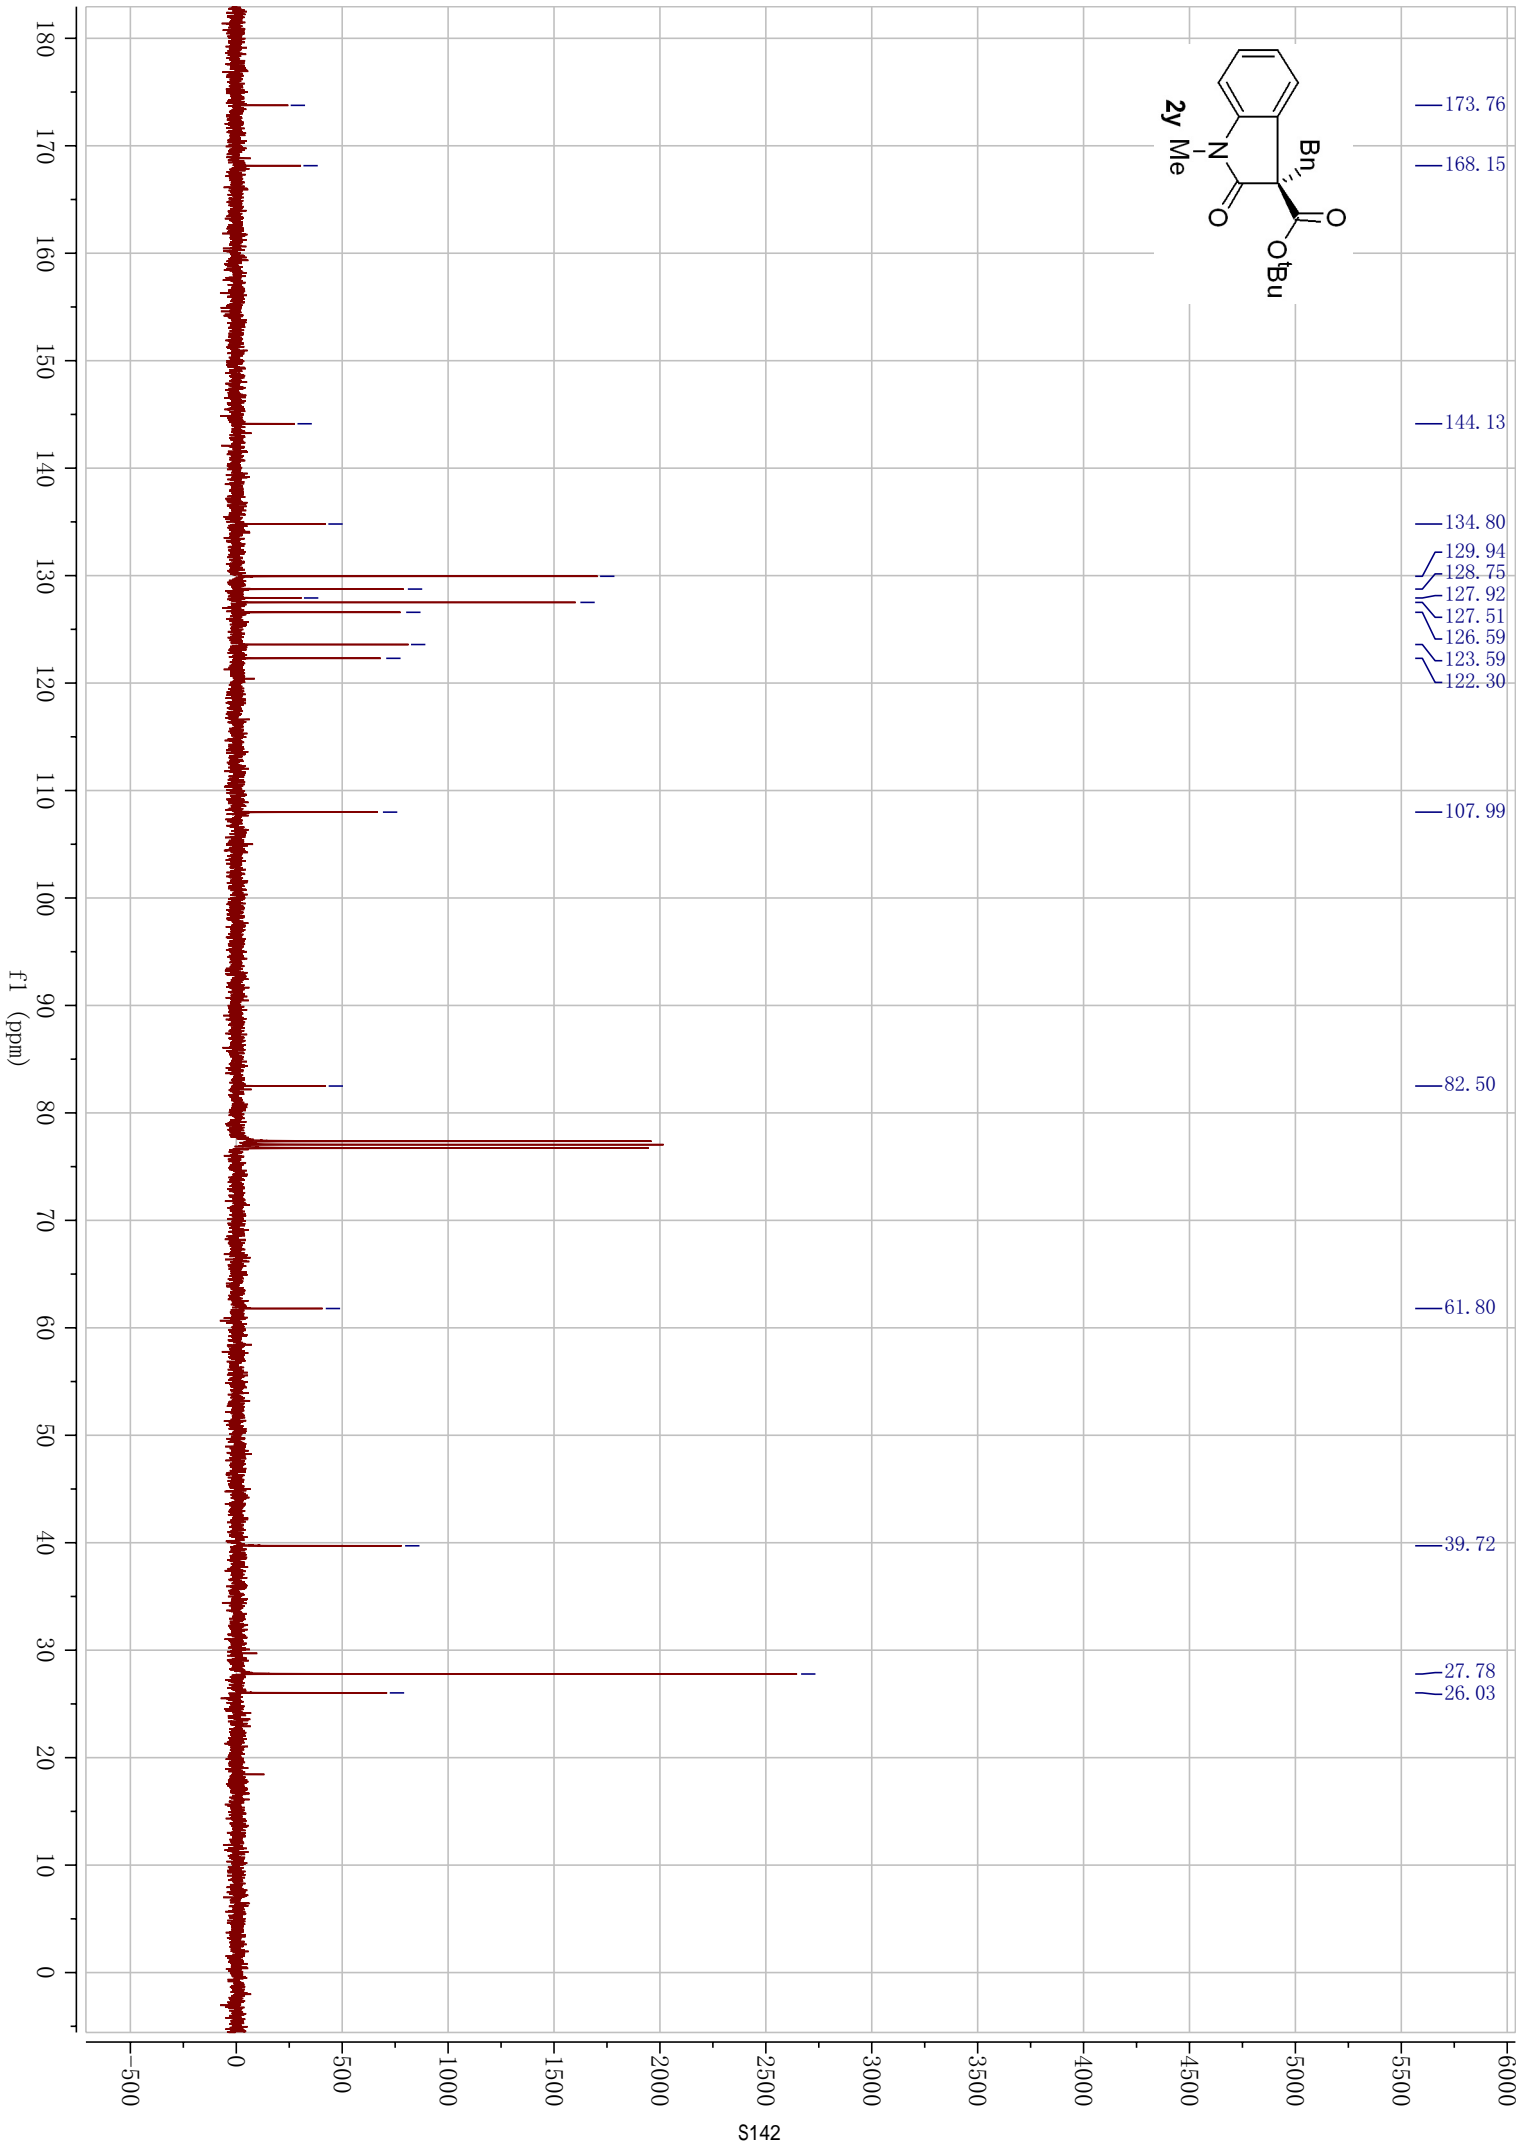

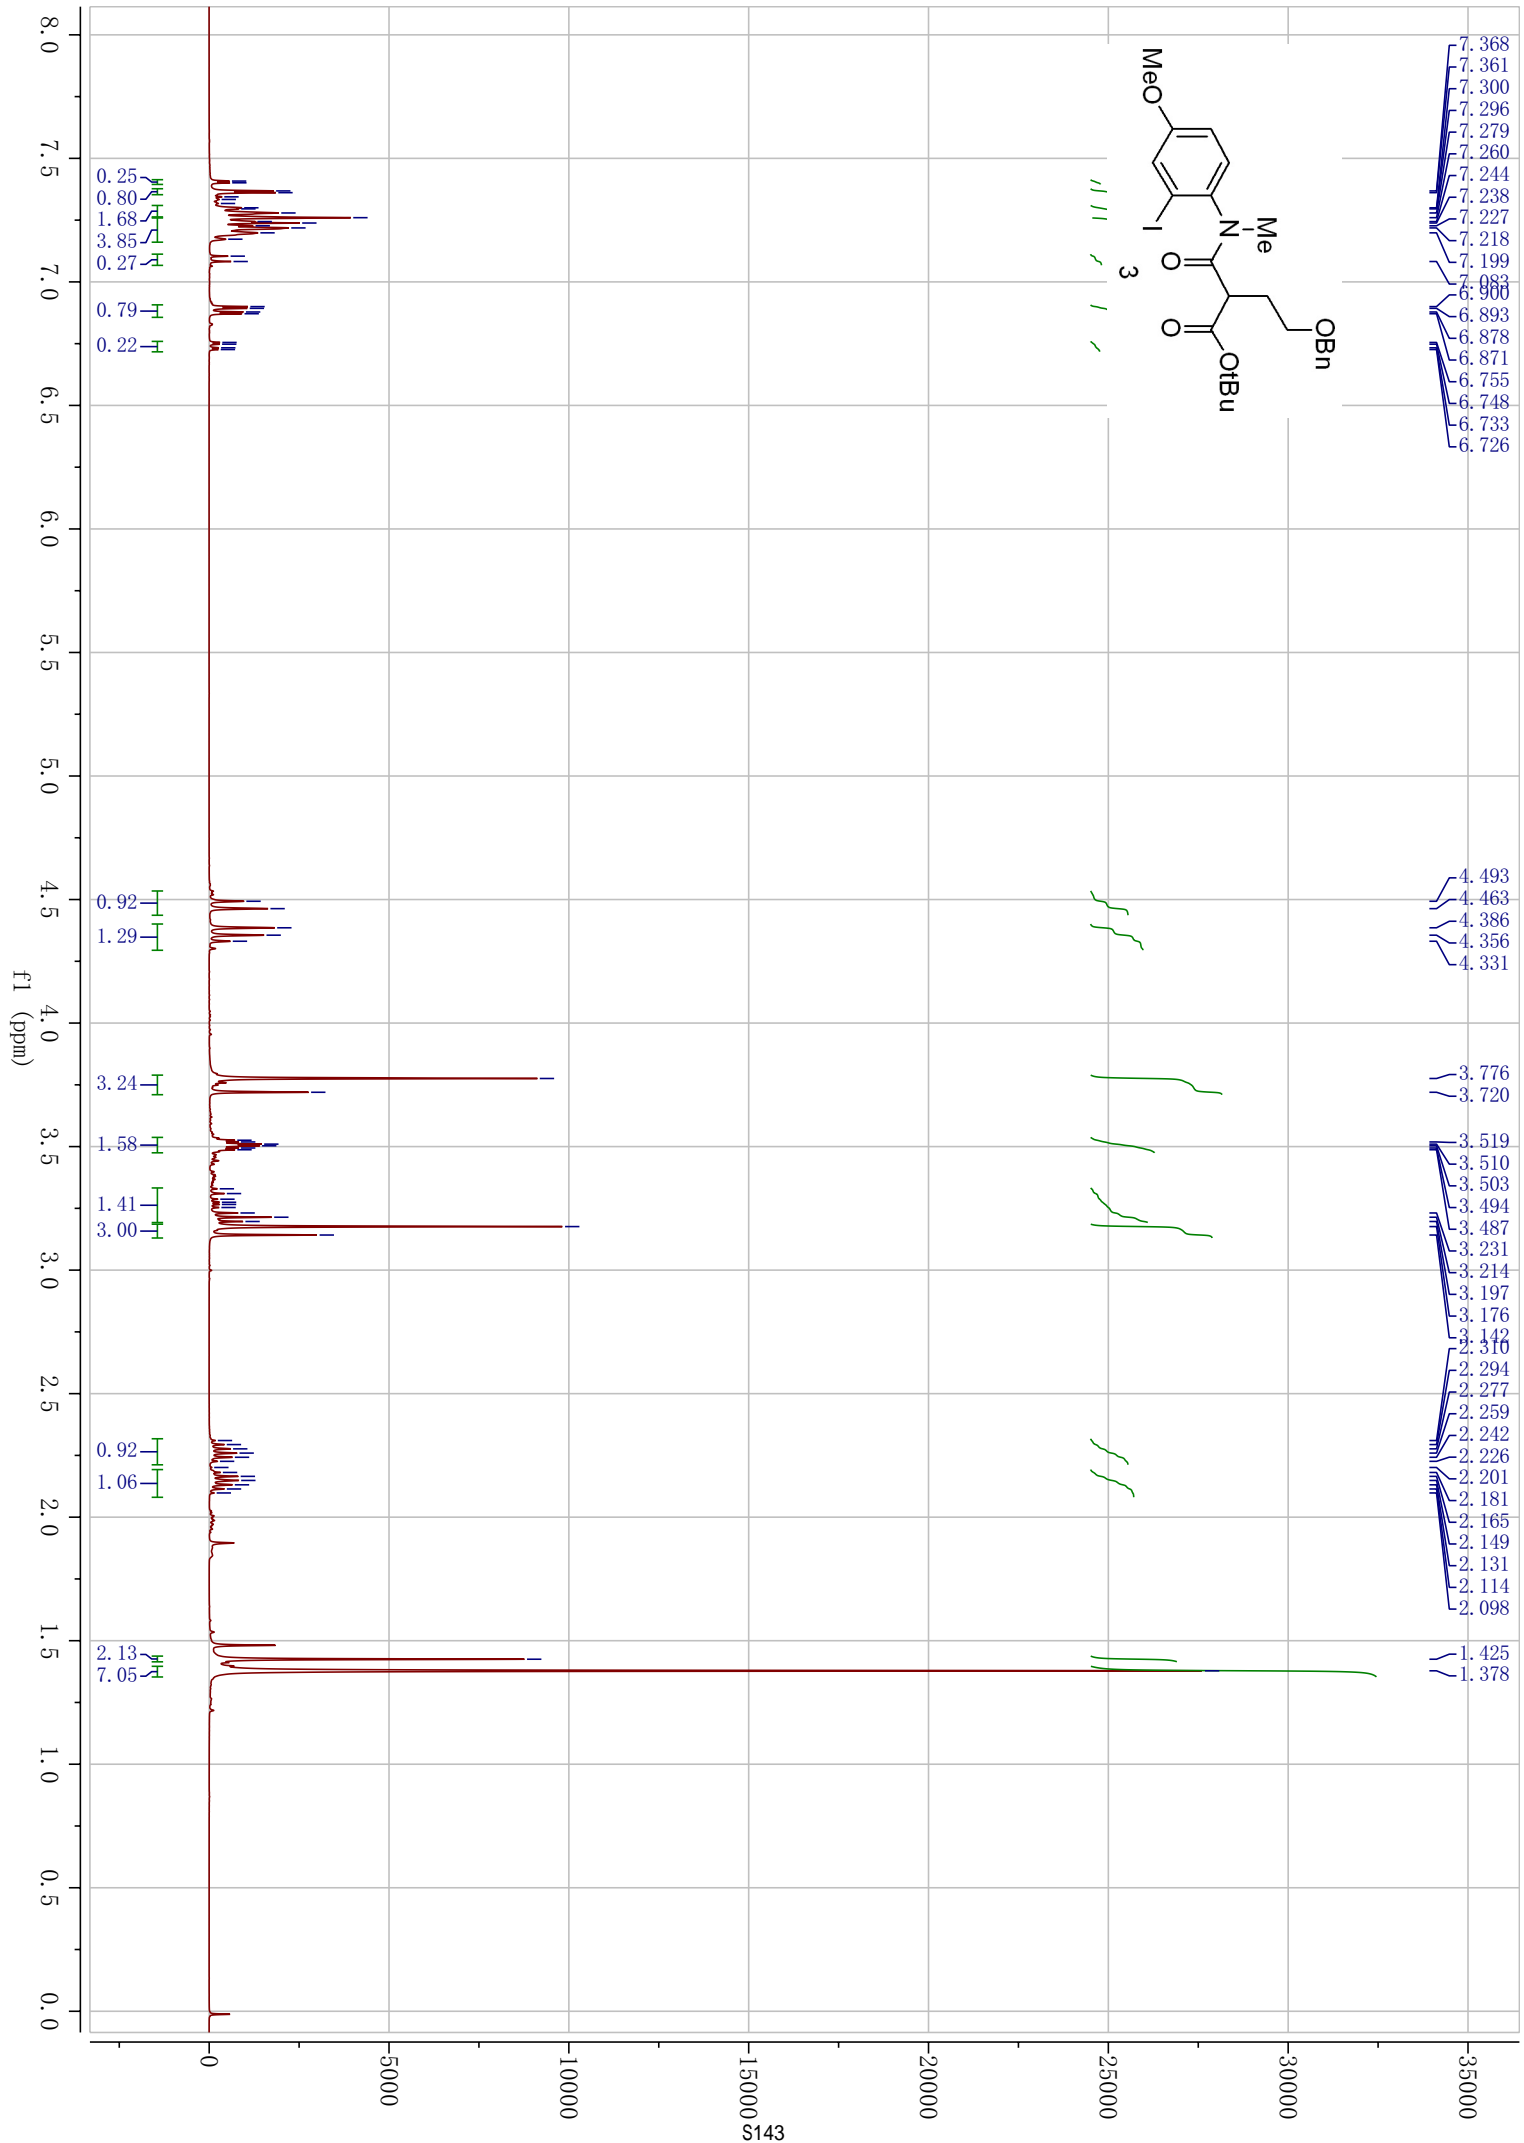

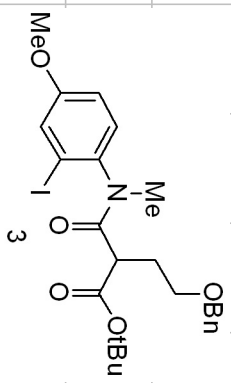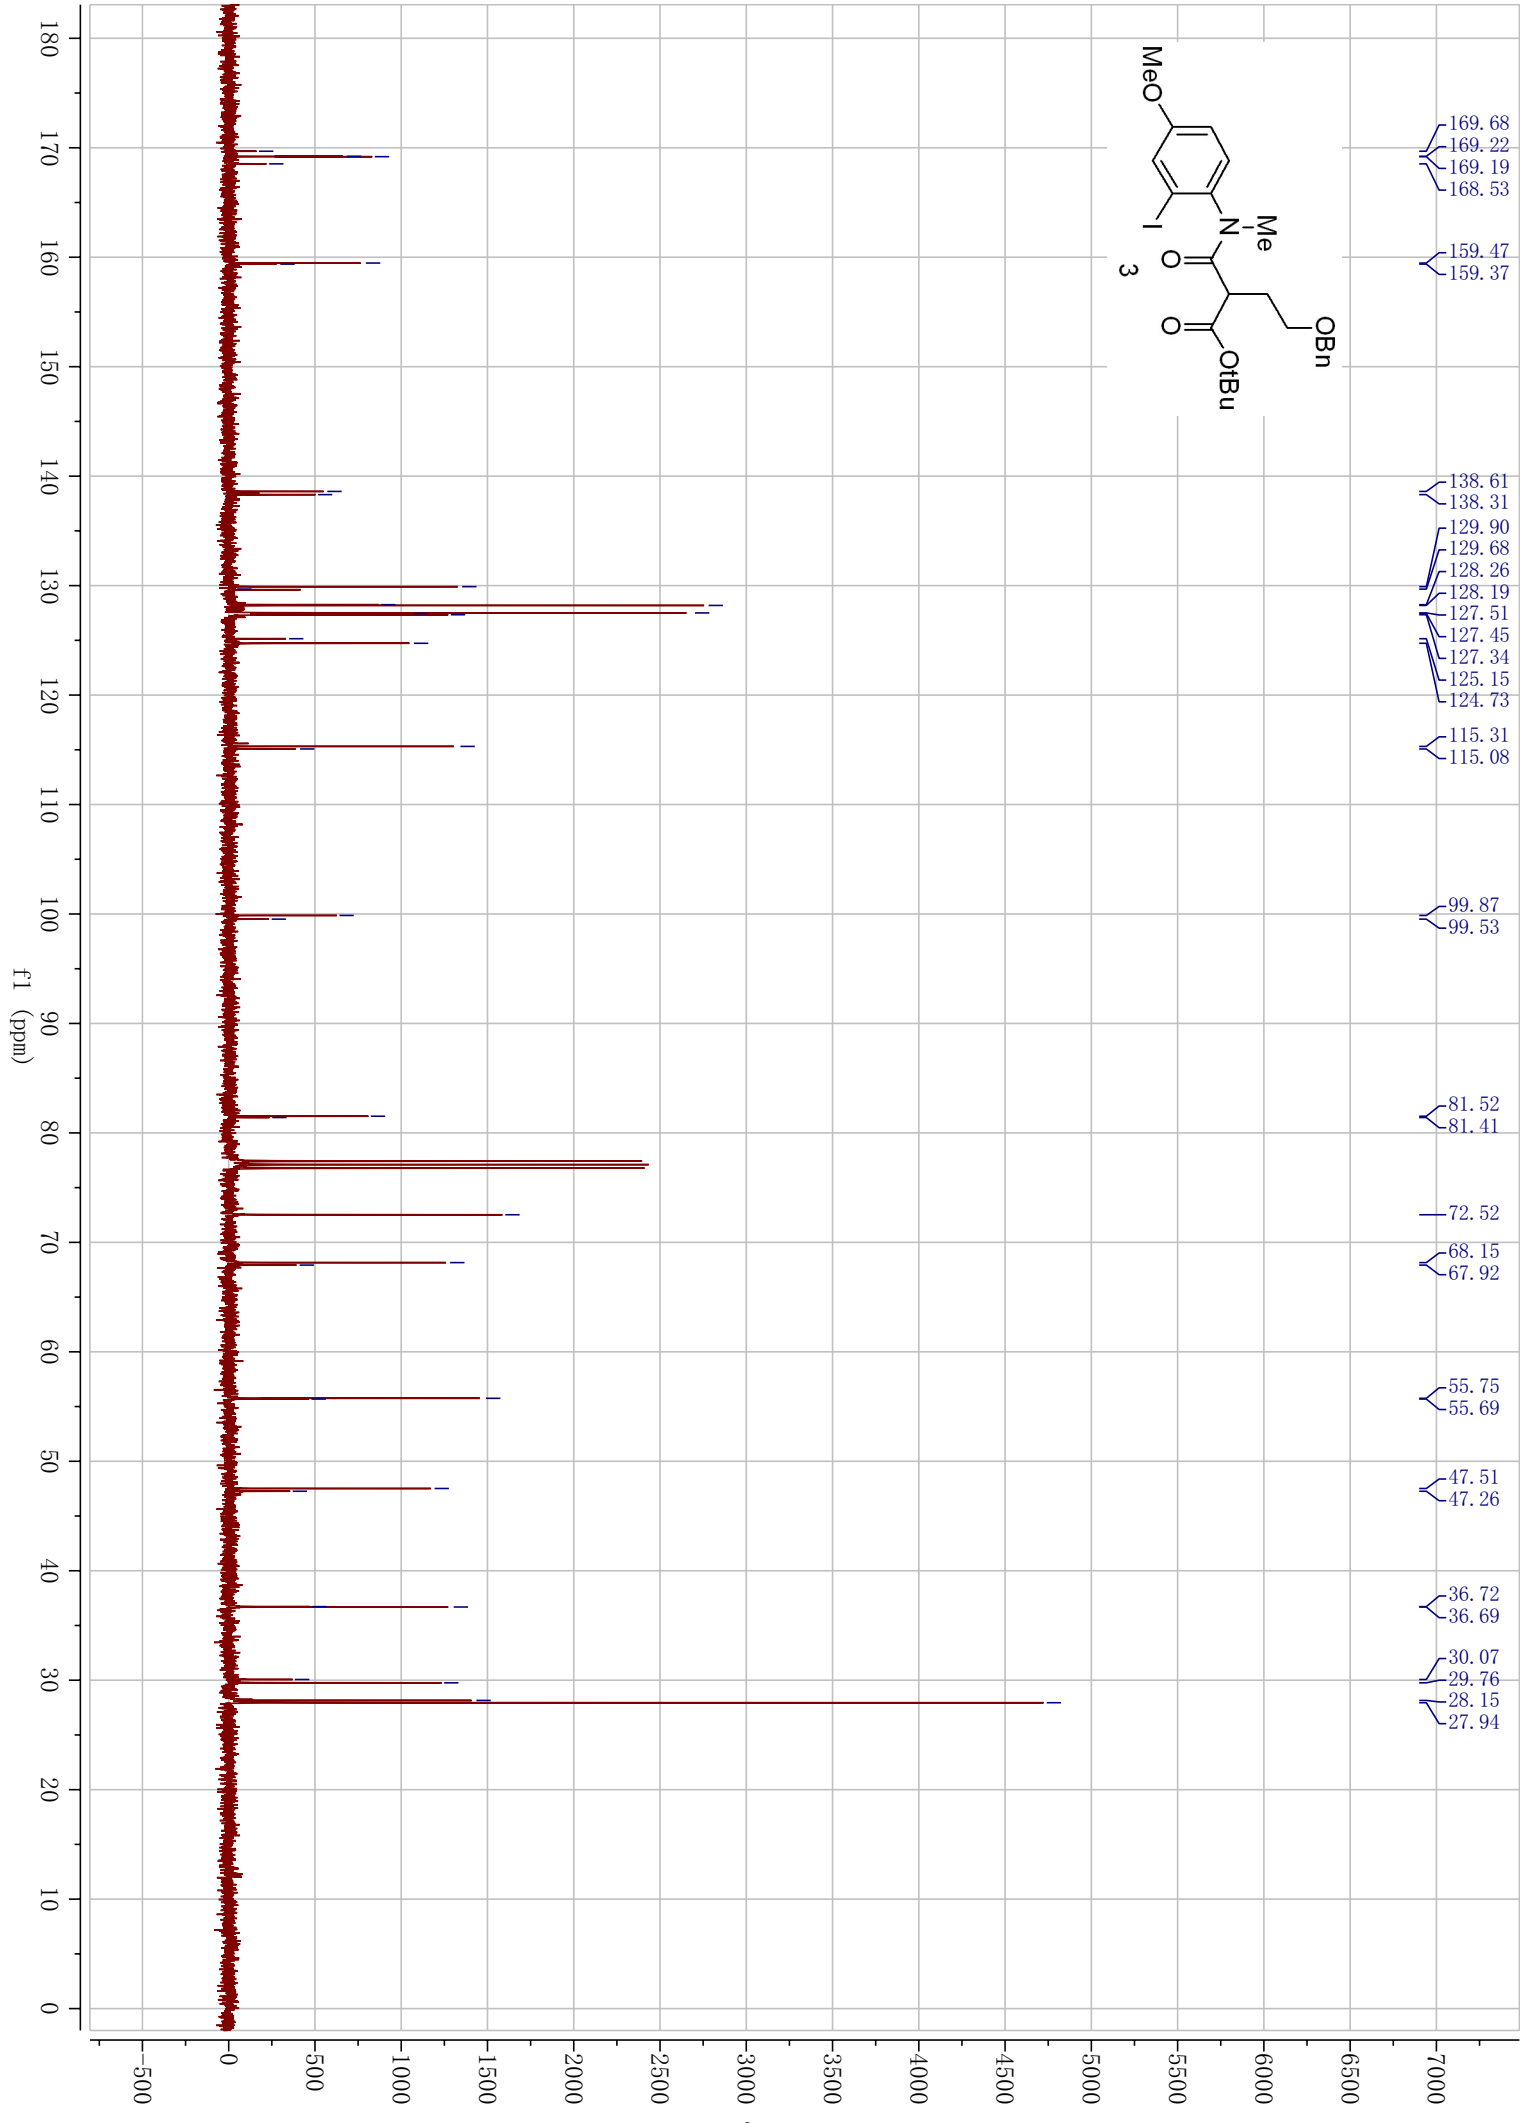

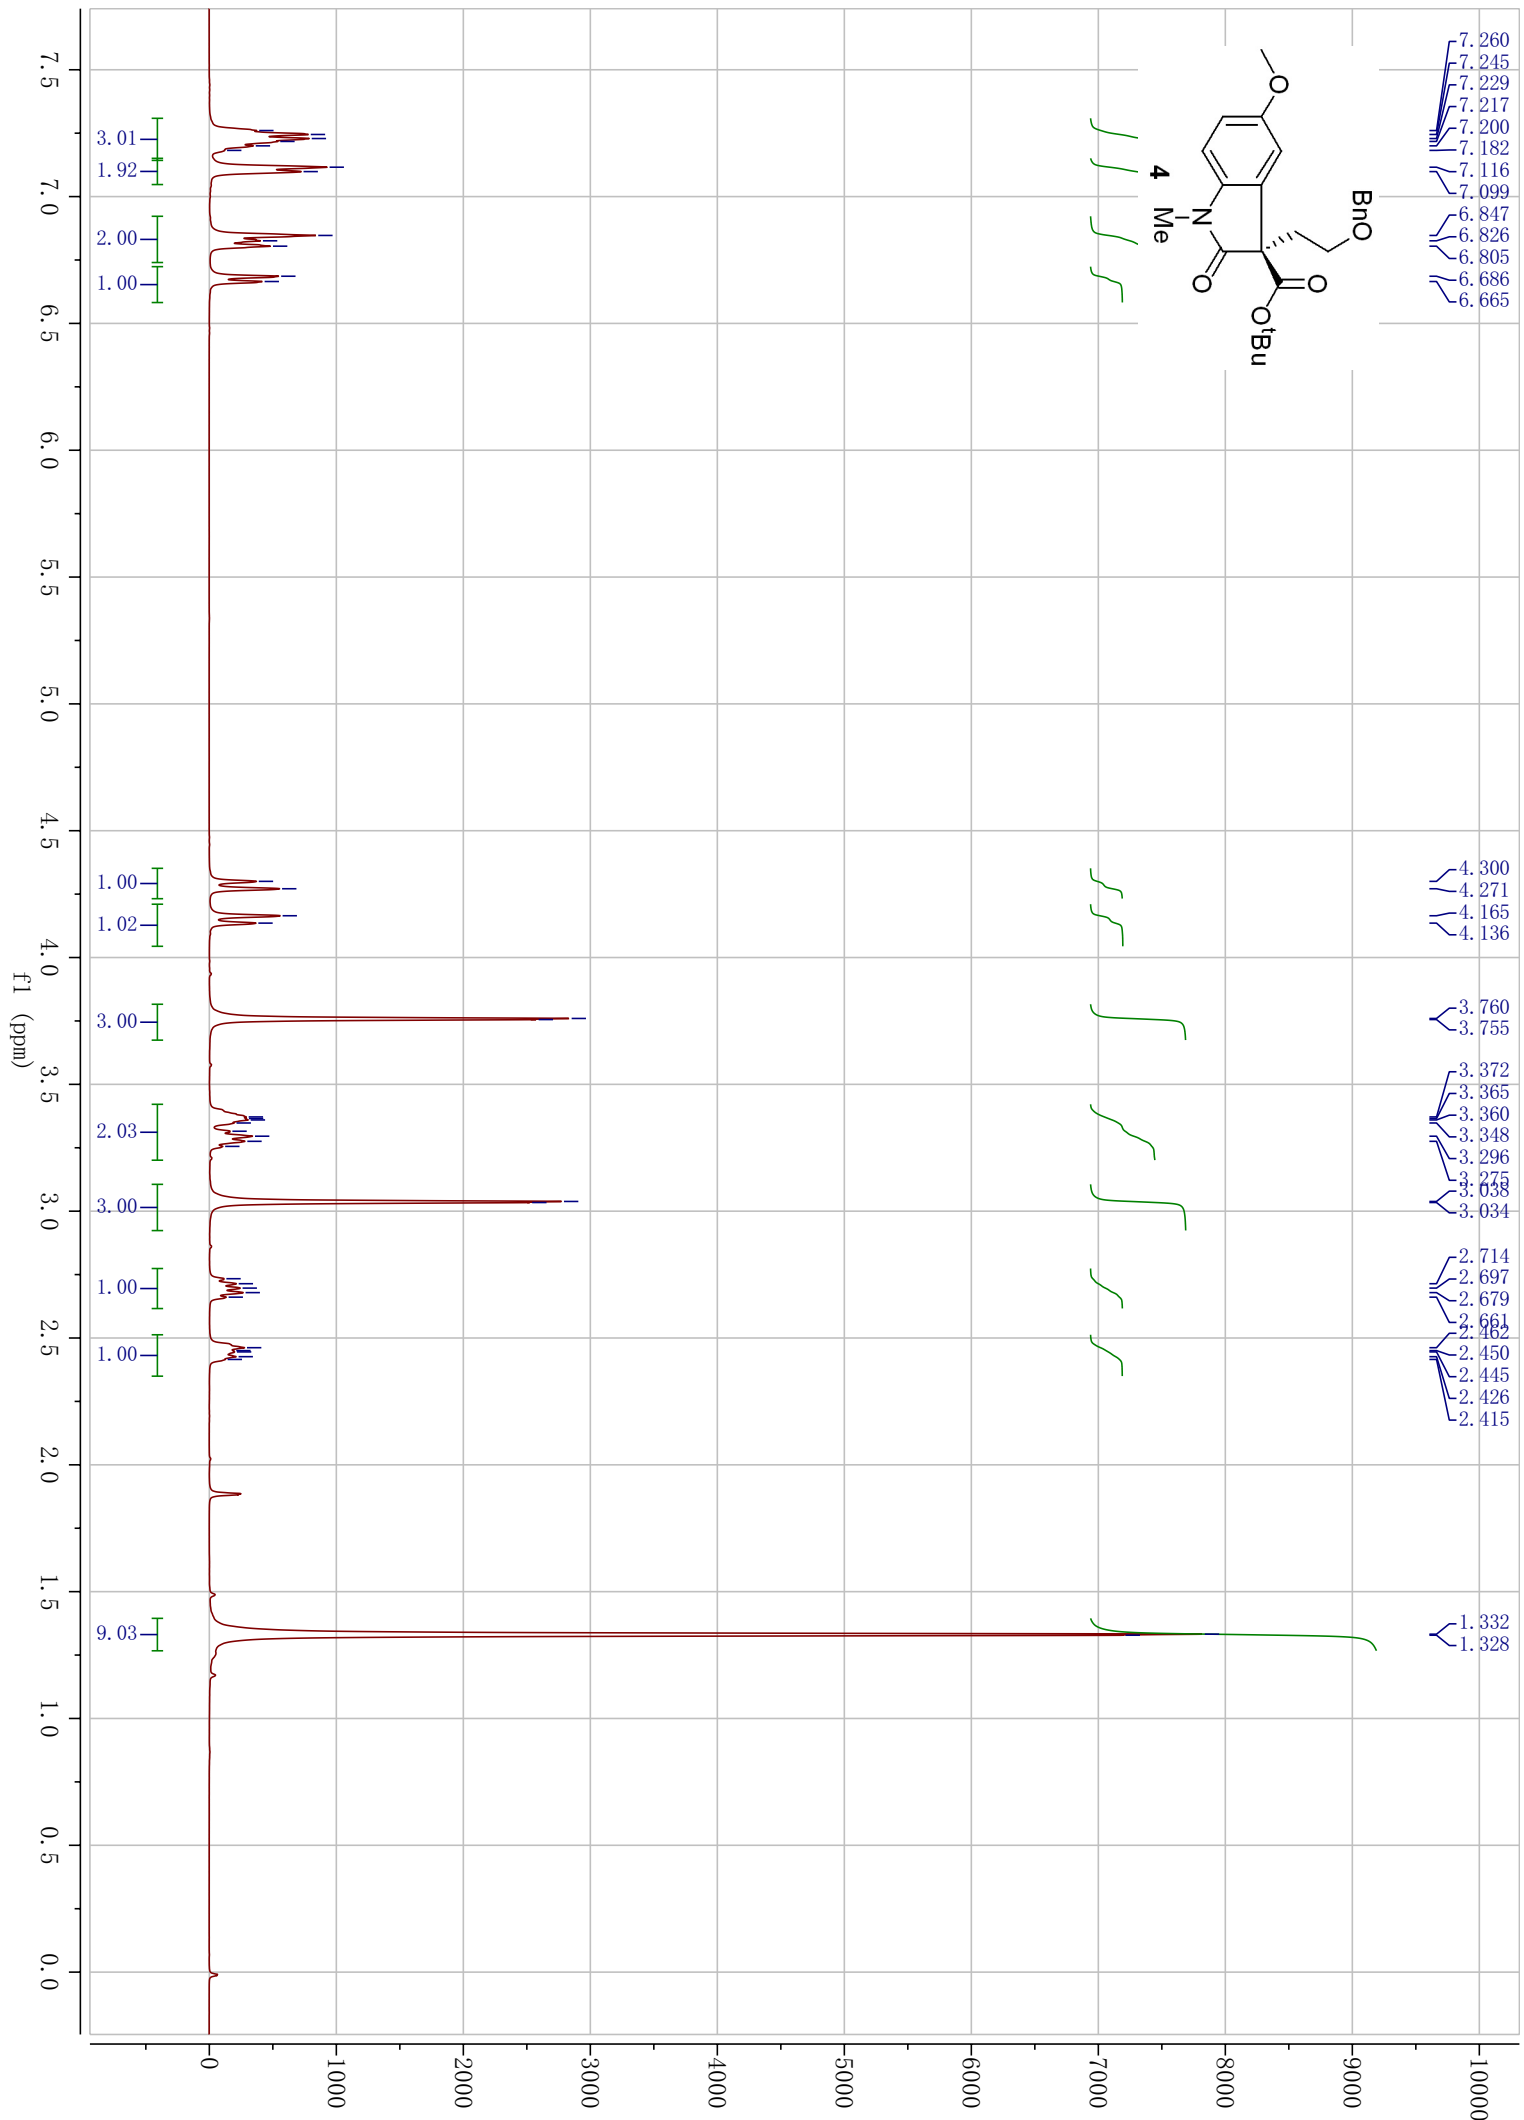

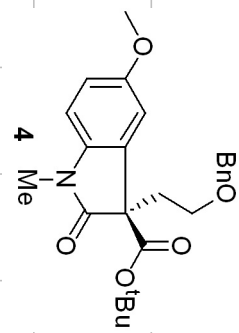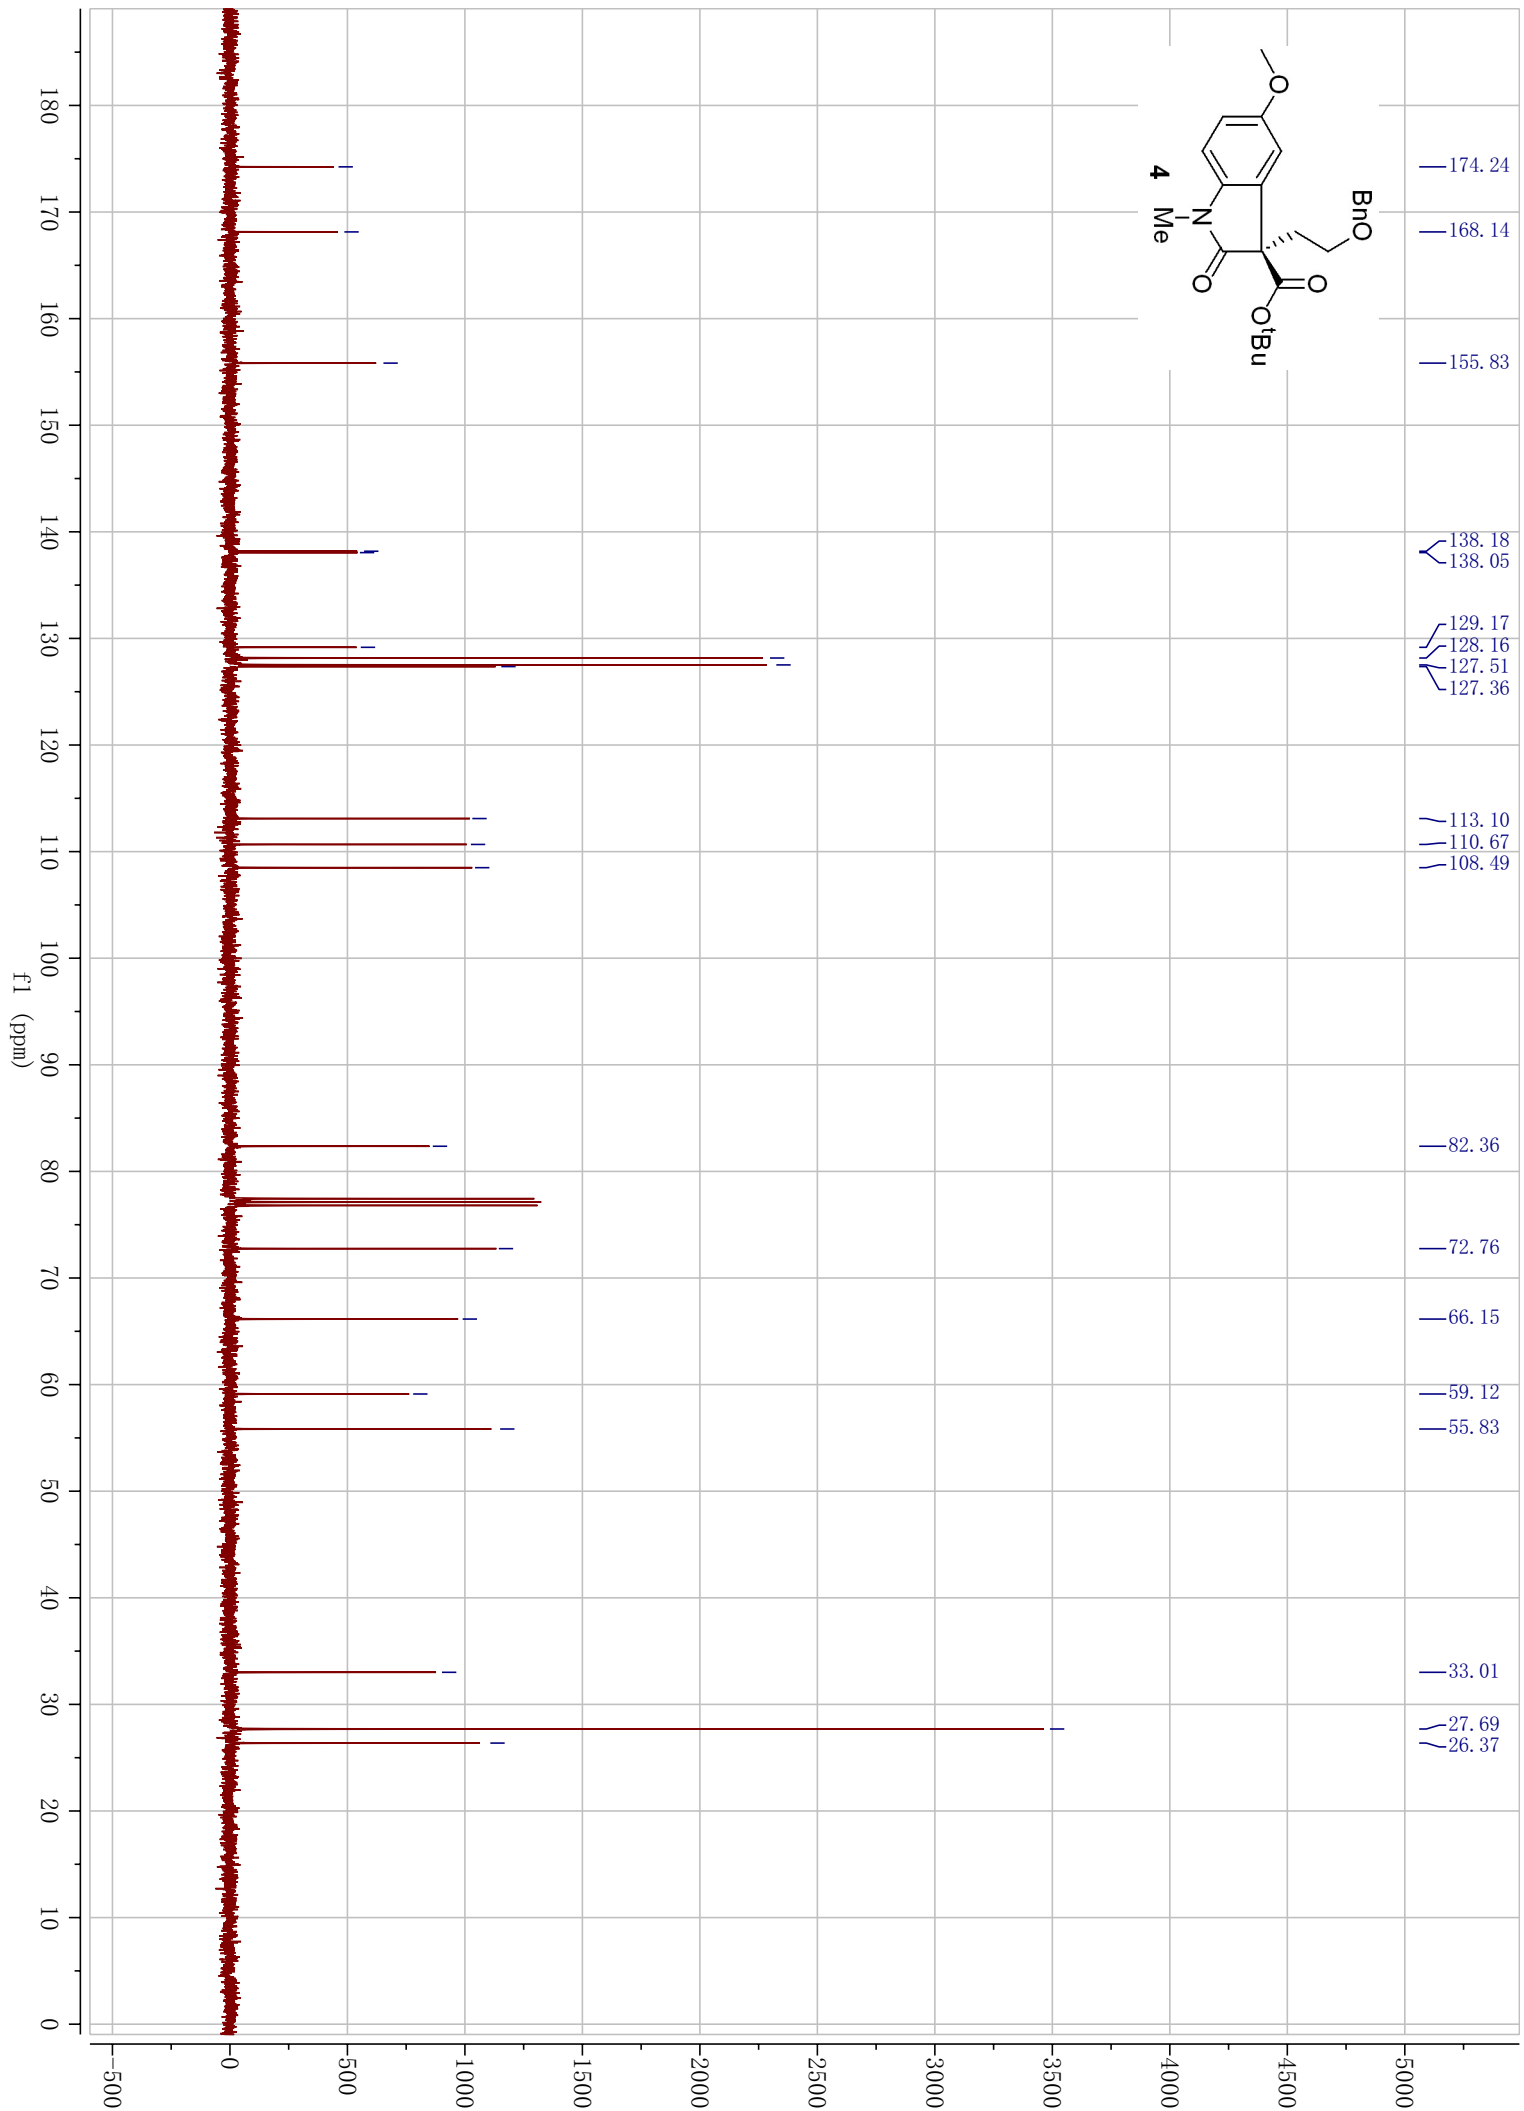

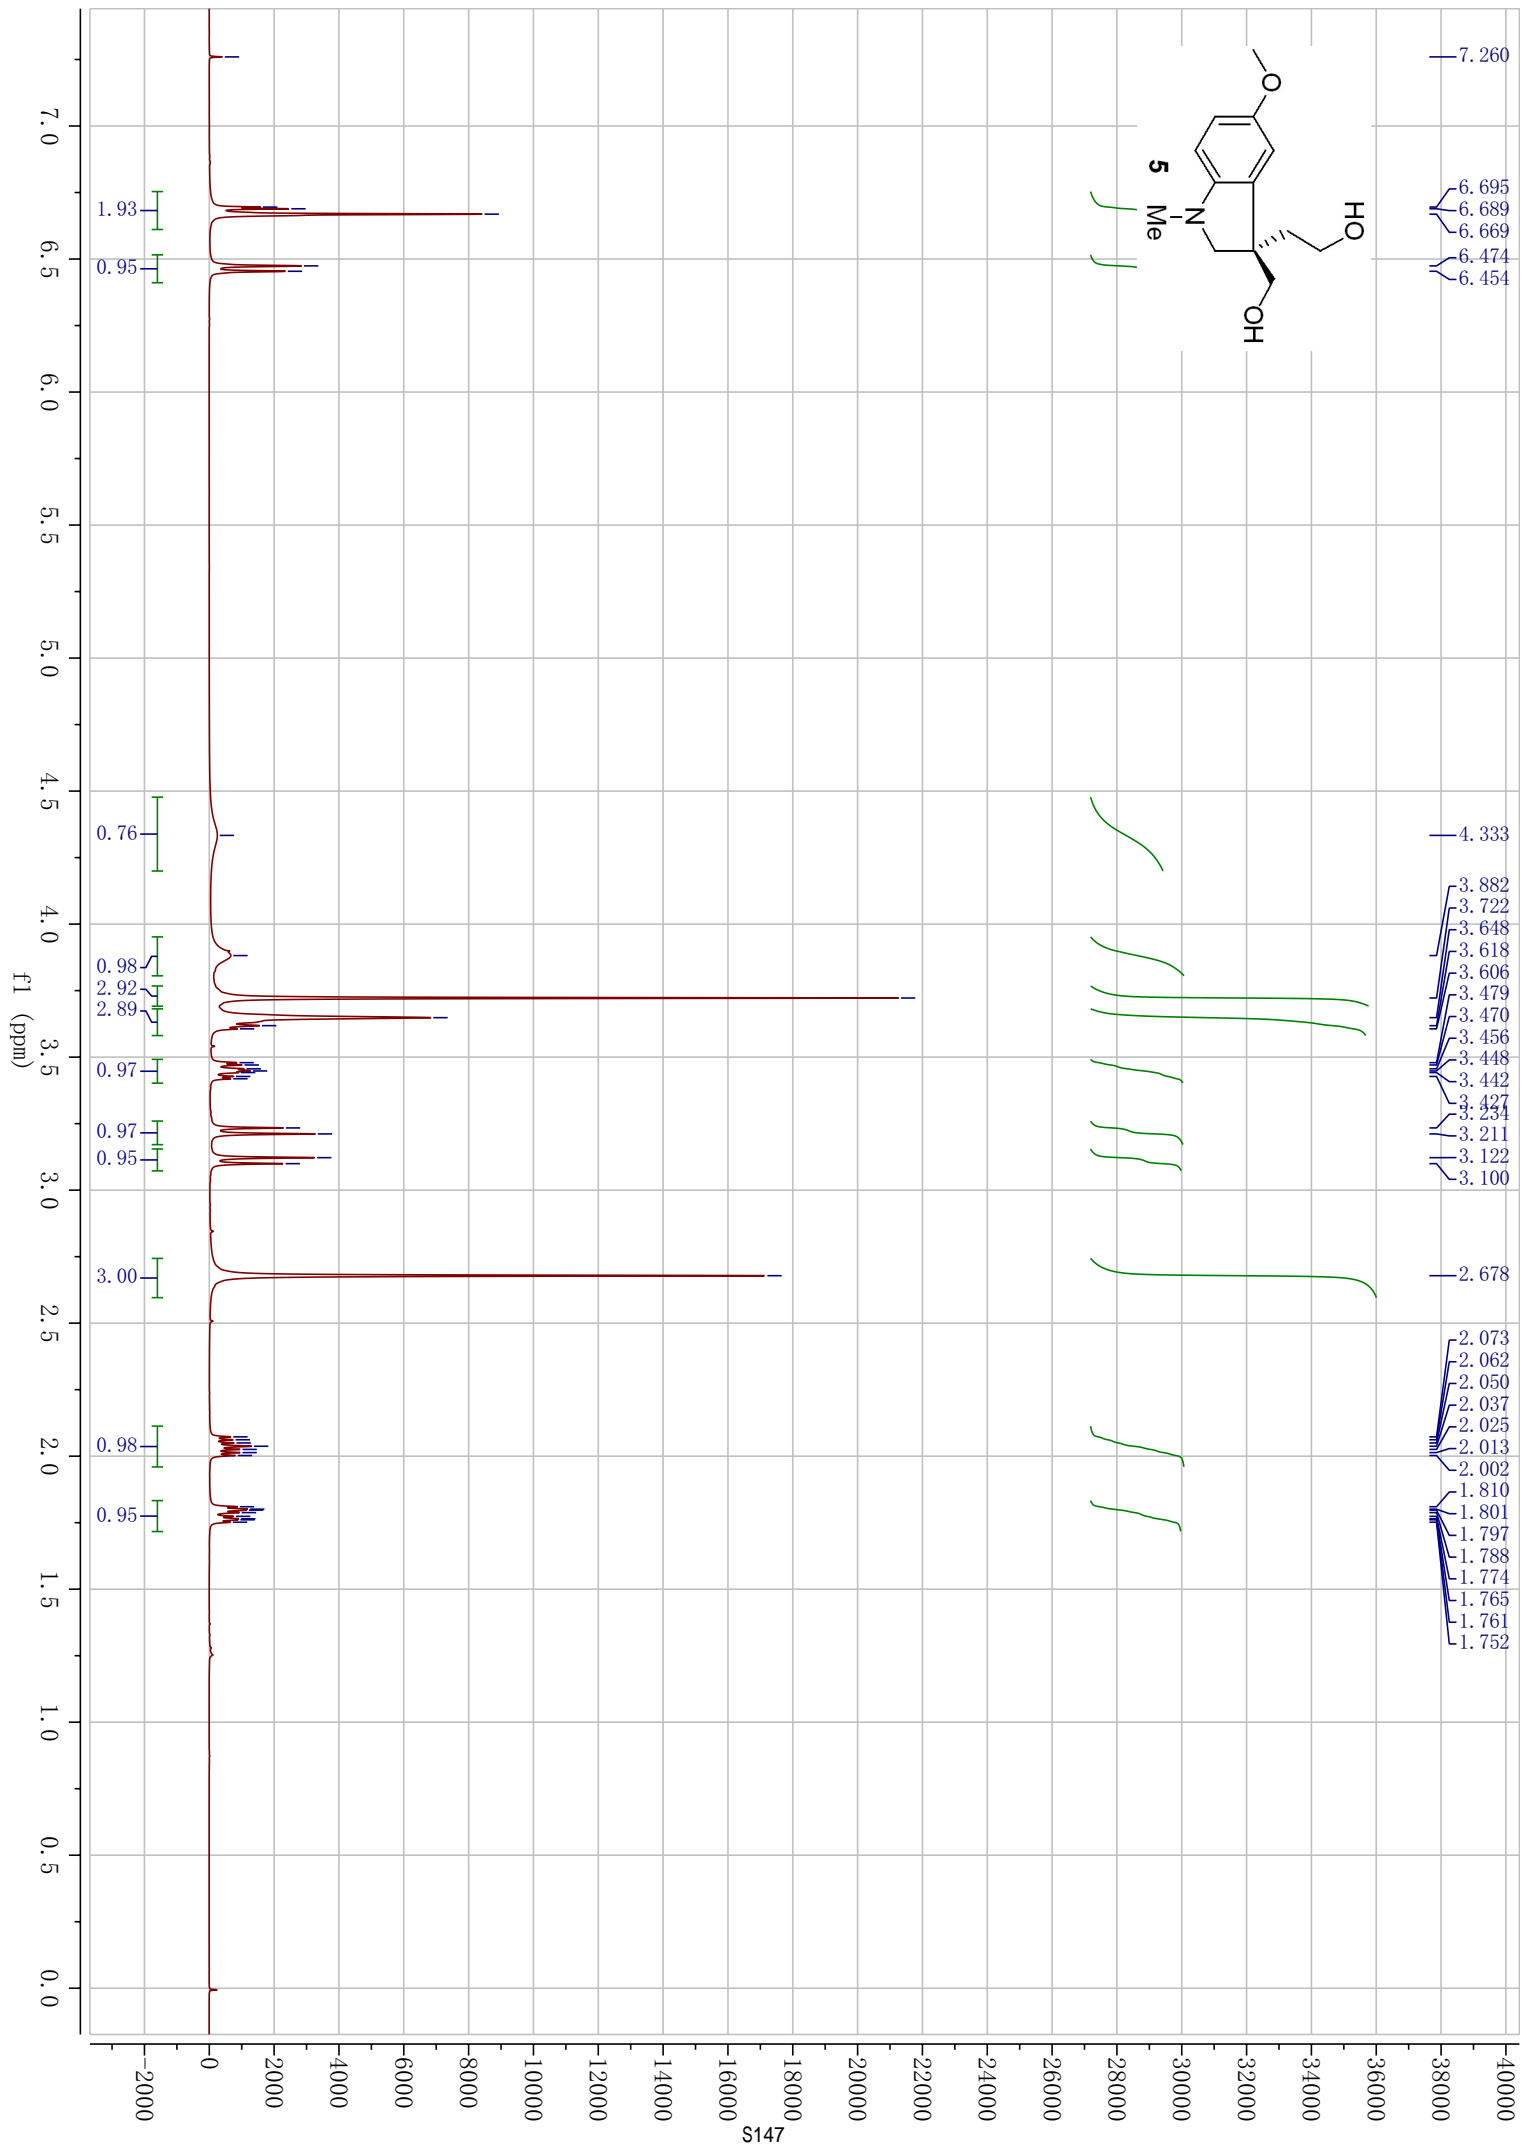

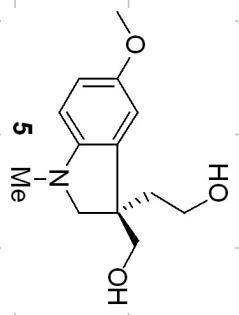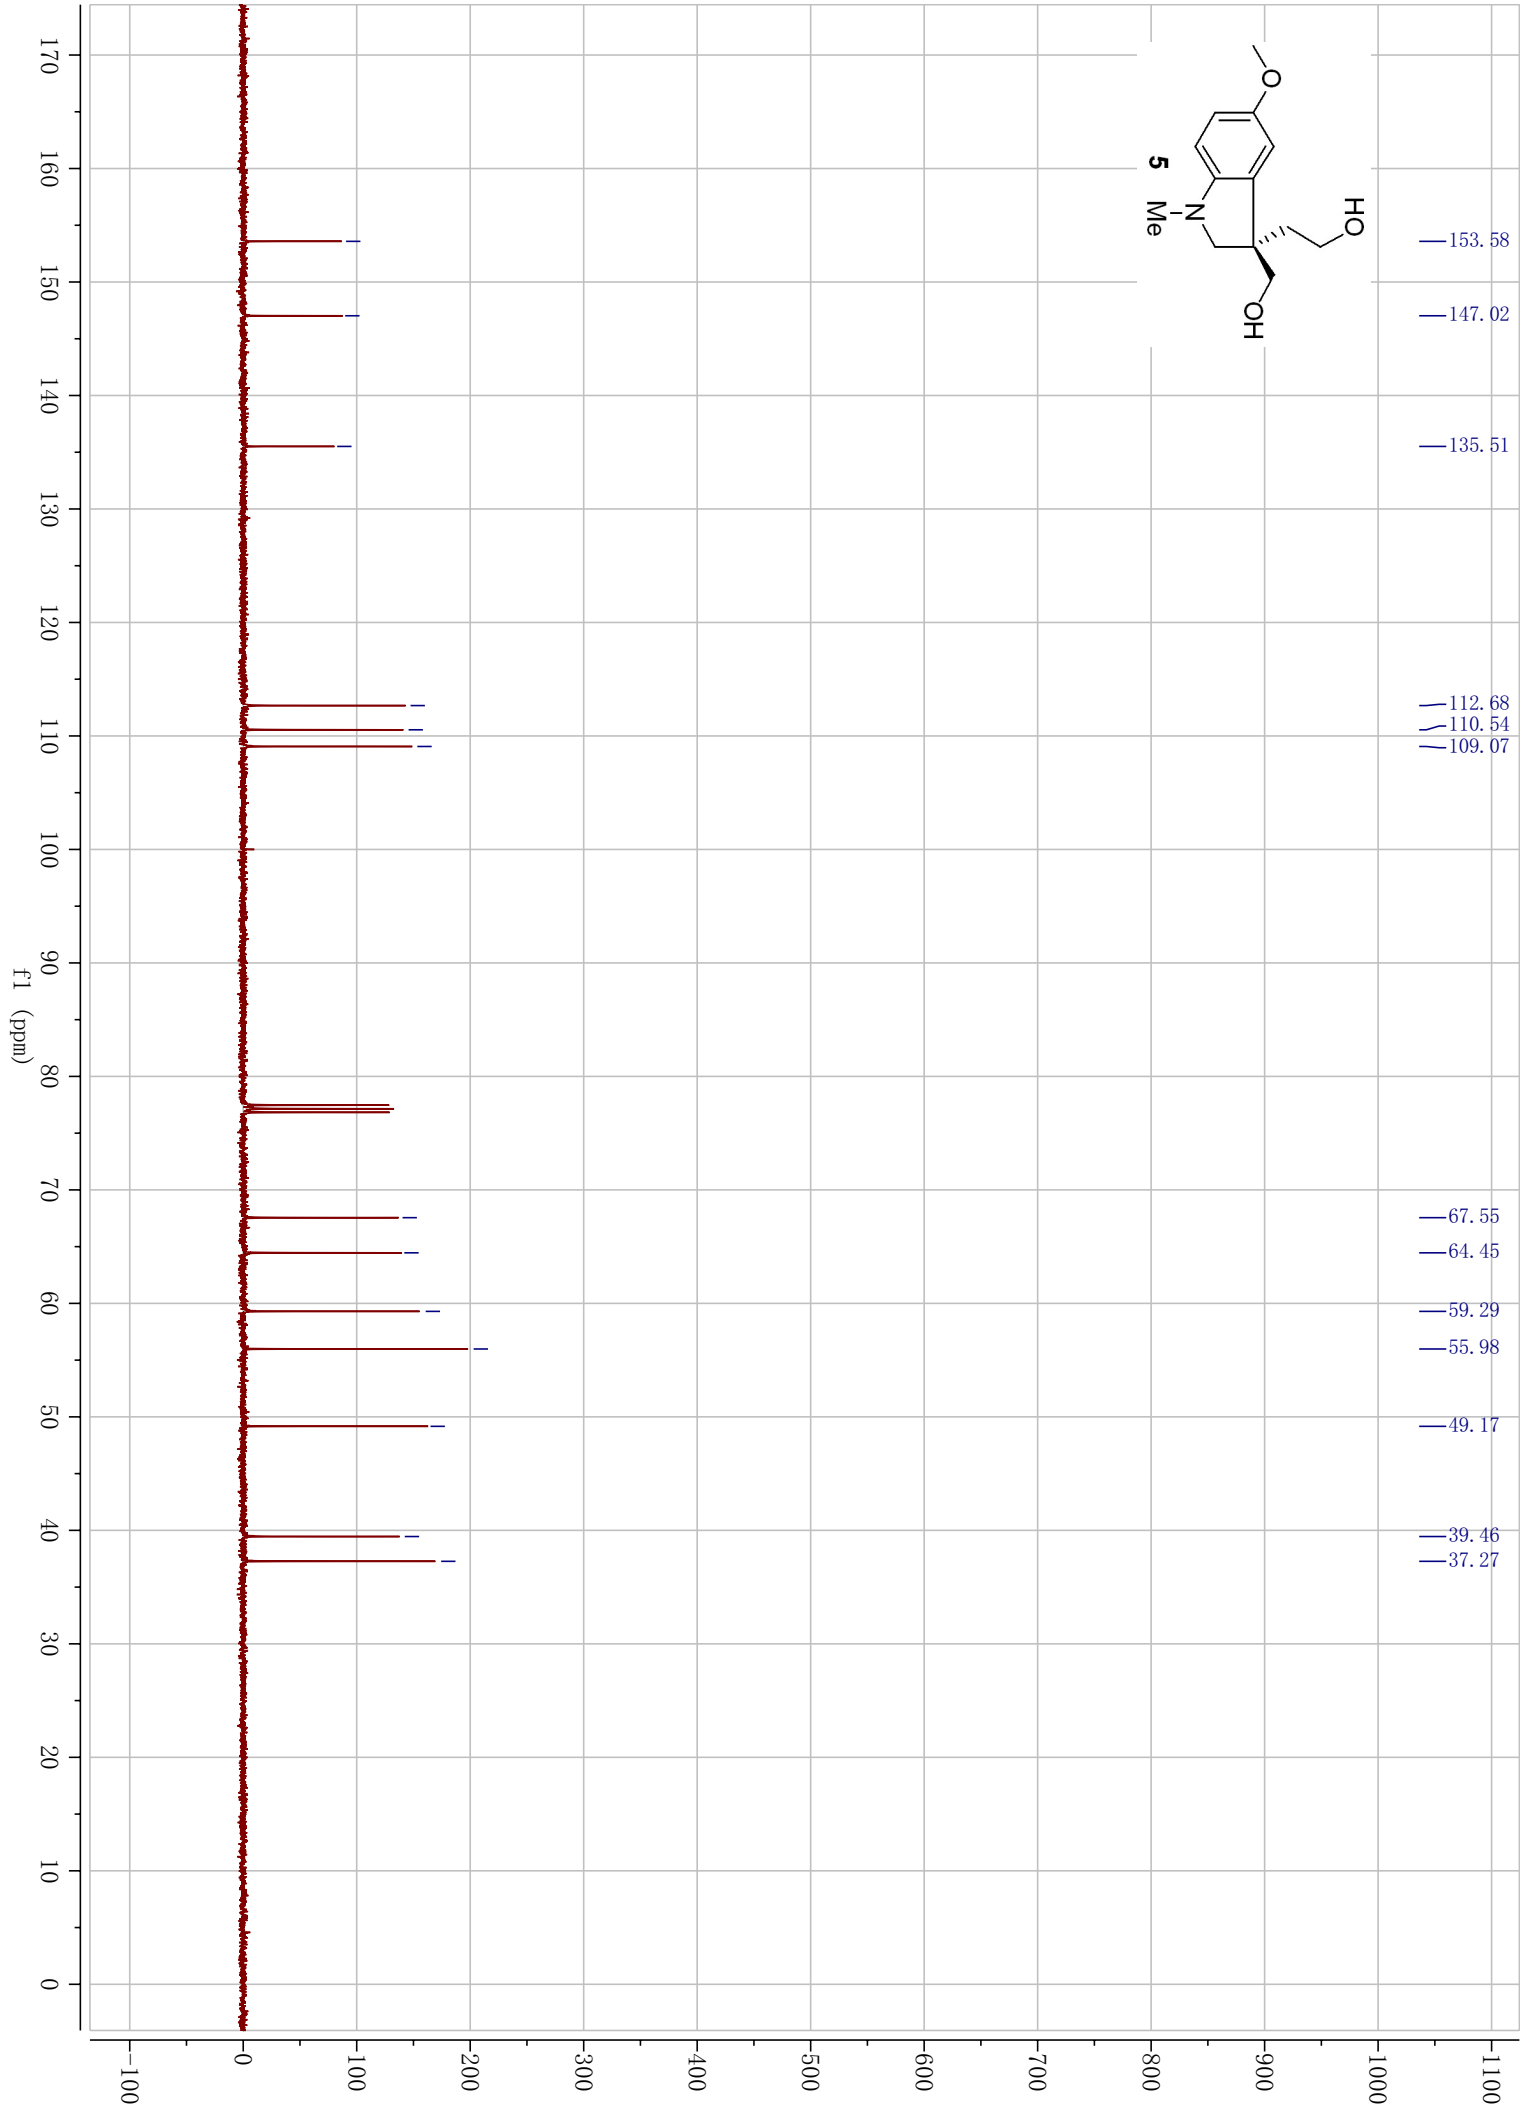



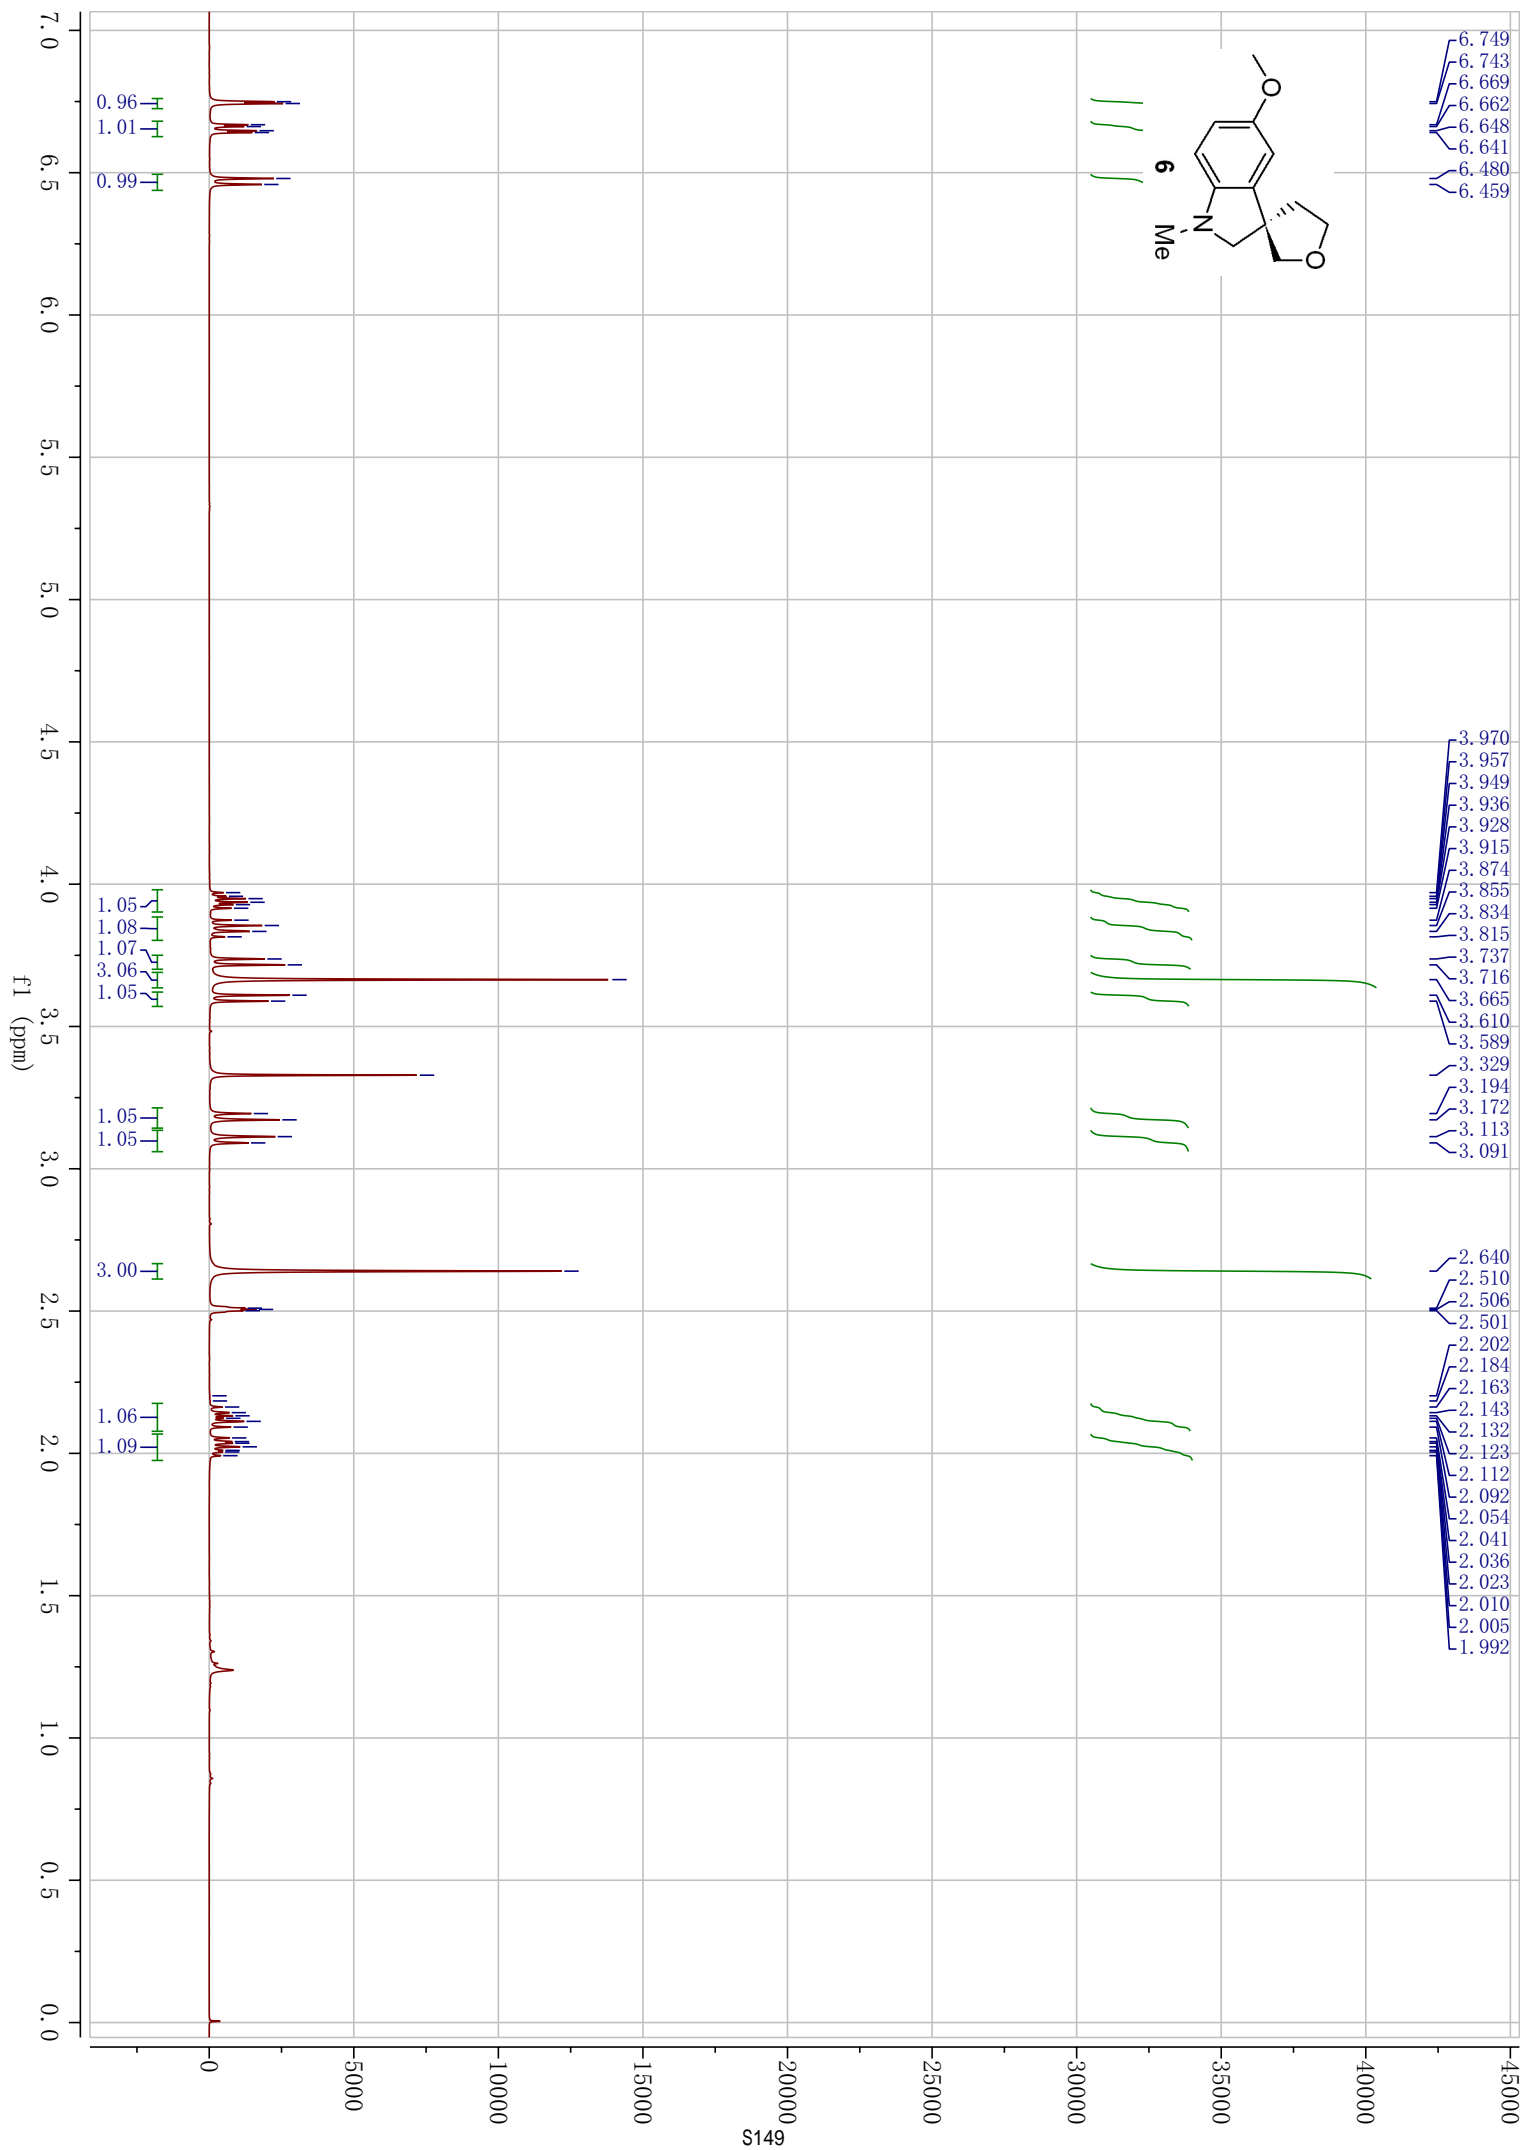

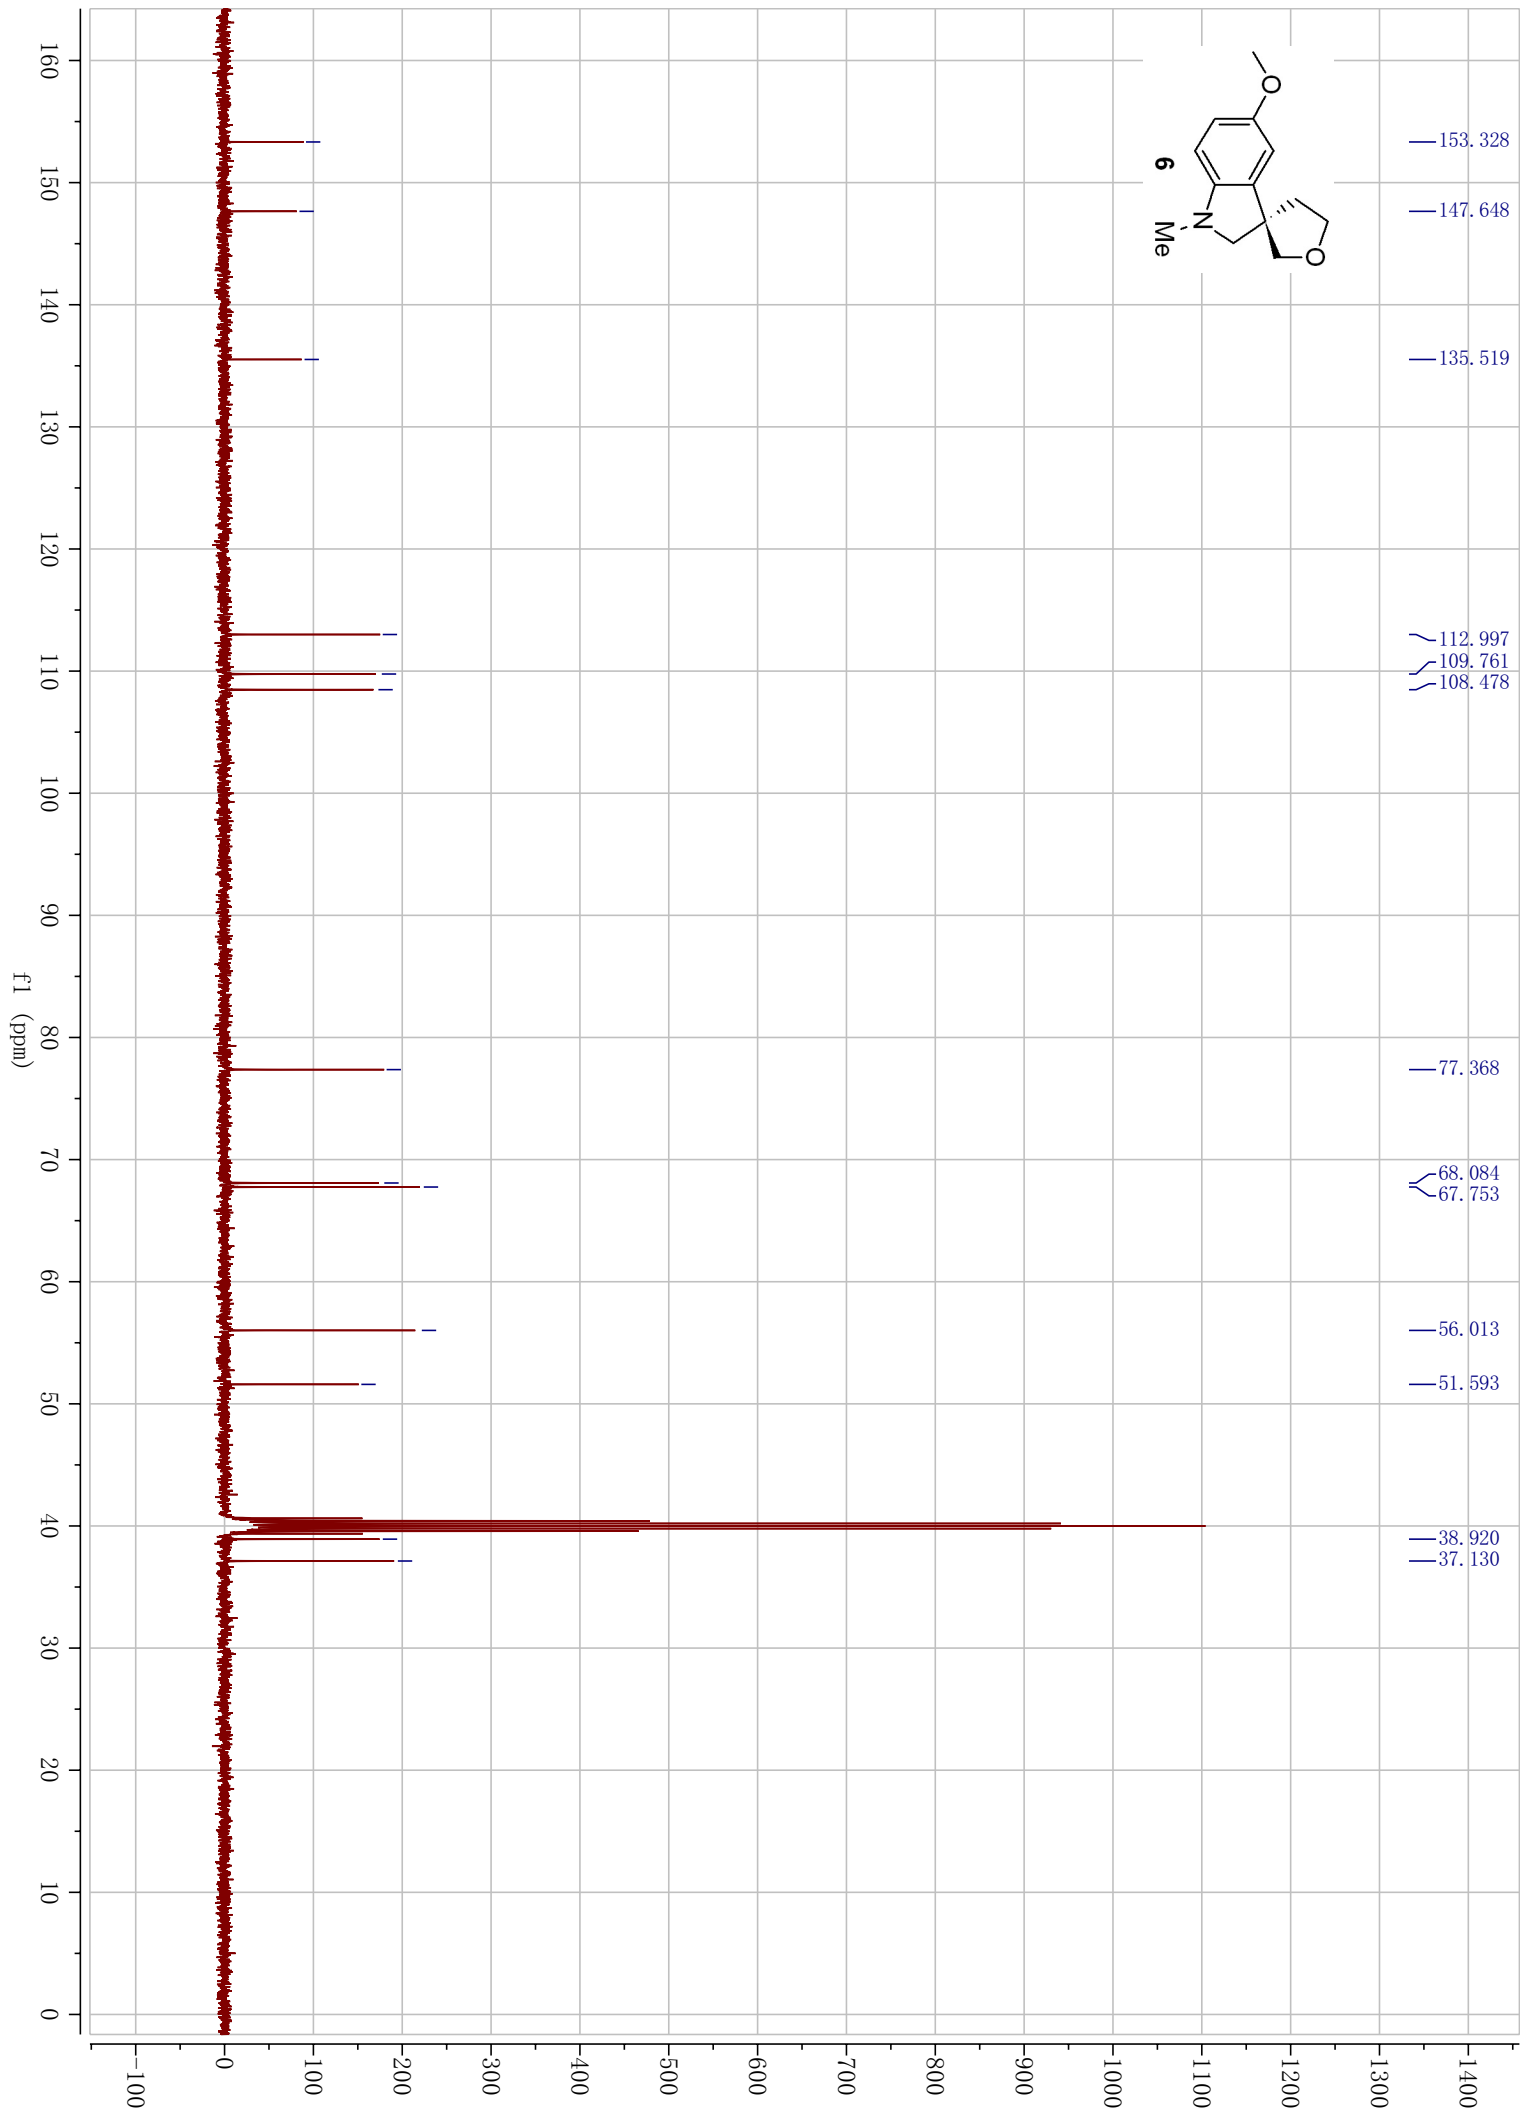

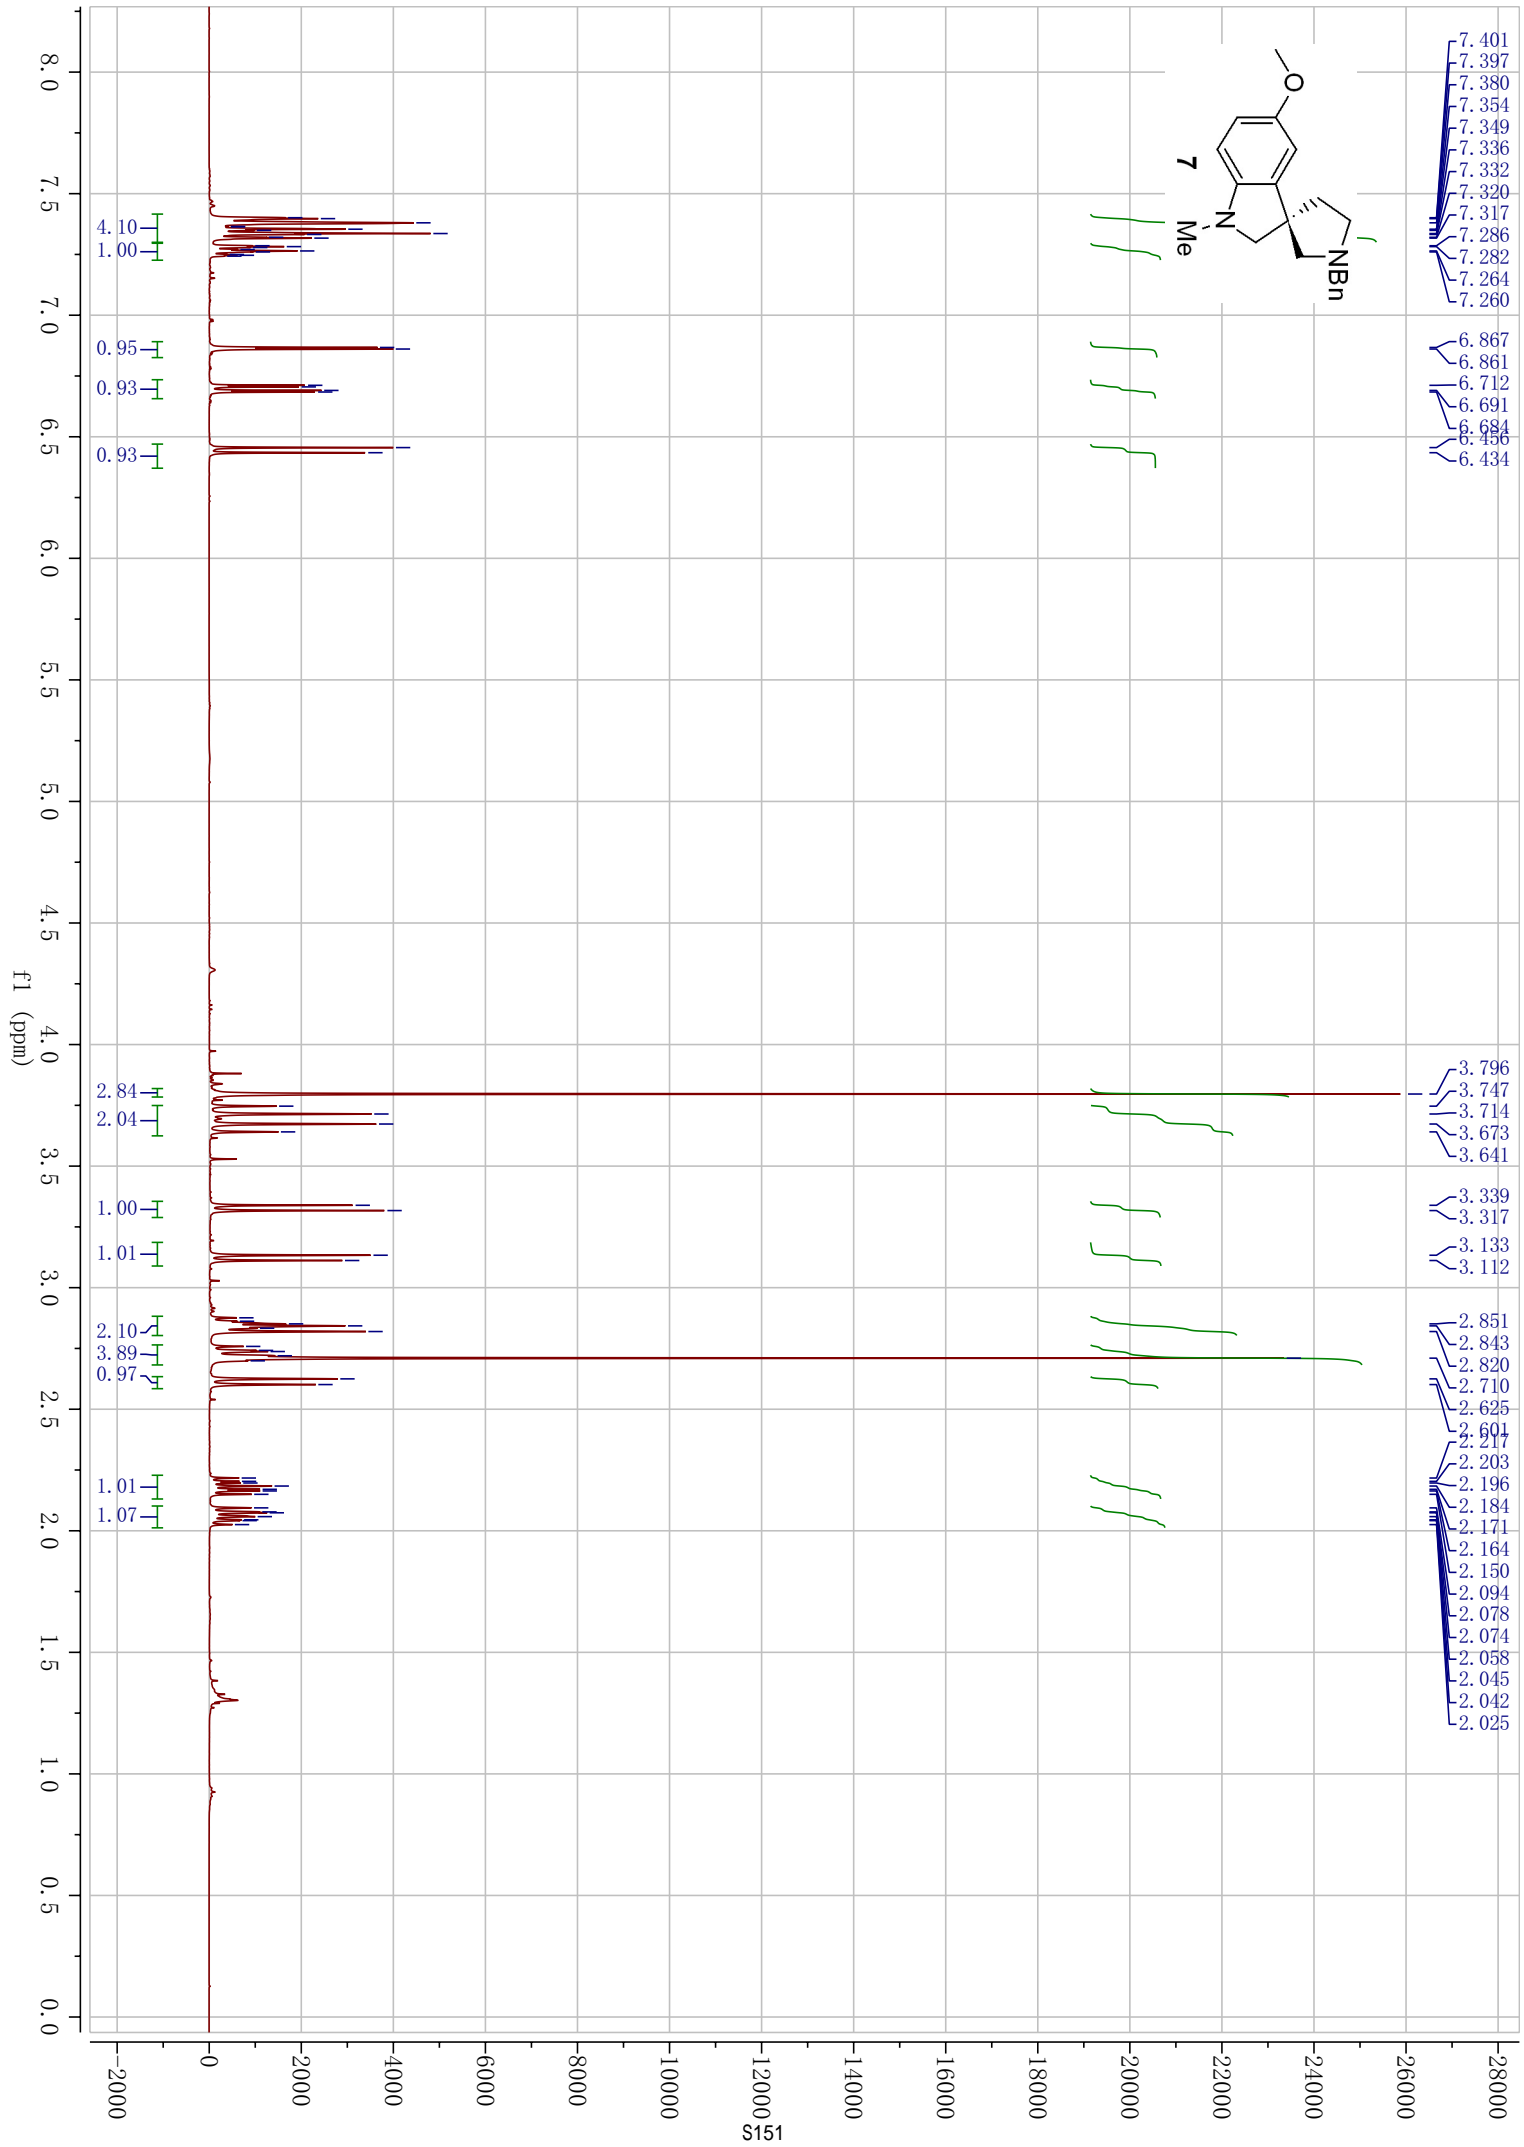

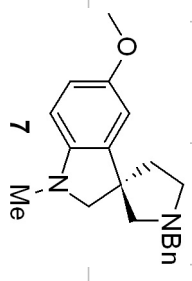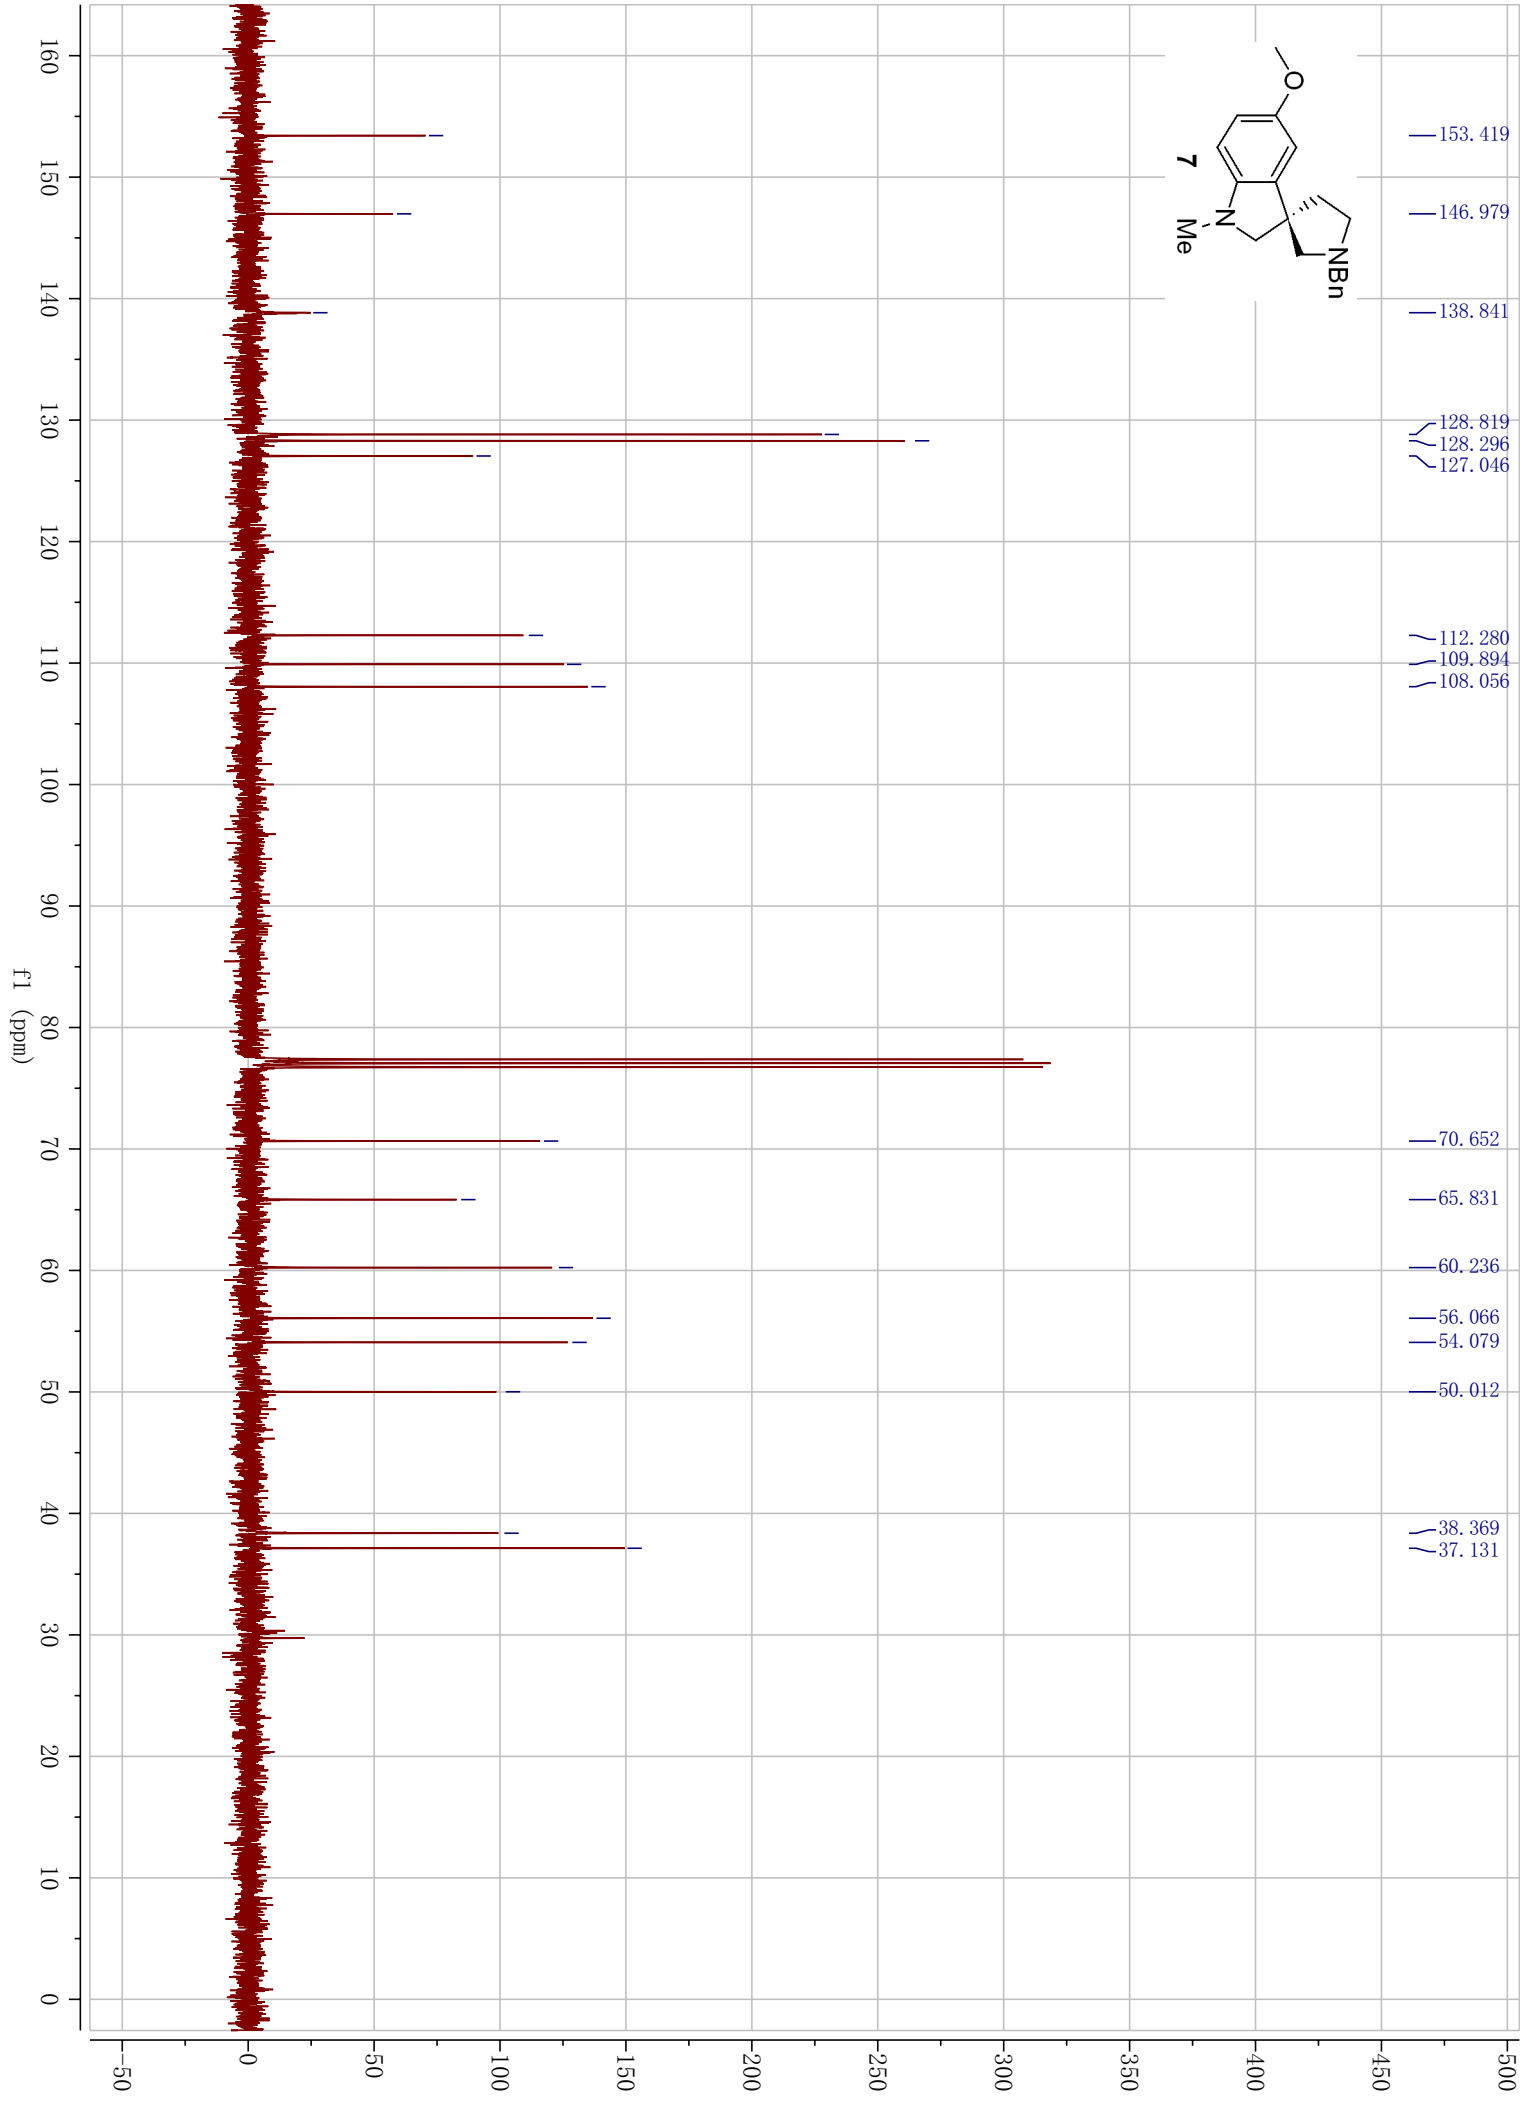

SHIMADZU LabSolutions HPLC Report

< Sample information >

Sample name : DZJC118-2-R-OJ-1%  
 Data name : 2a--DZJC118-2-yizhiRAC-OJ-1%.lcd  
 Acq. Method : OJ-H-1%.lcm  
 Location : 1-1  
 : 1 uL  
 Ana. Date : 2020/8/6 19:18:18  
 Pro. Date : 2020/8/6 22:52:47  
 Sample Type : unknown  
 Analyst : System Administrator  
 Processor : System Administrator

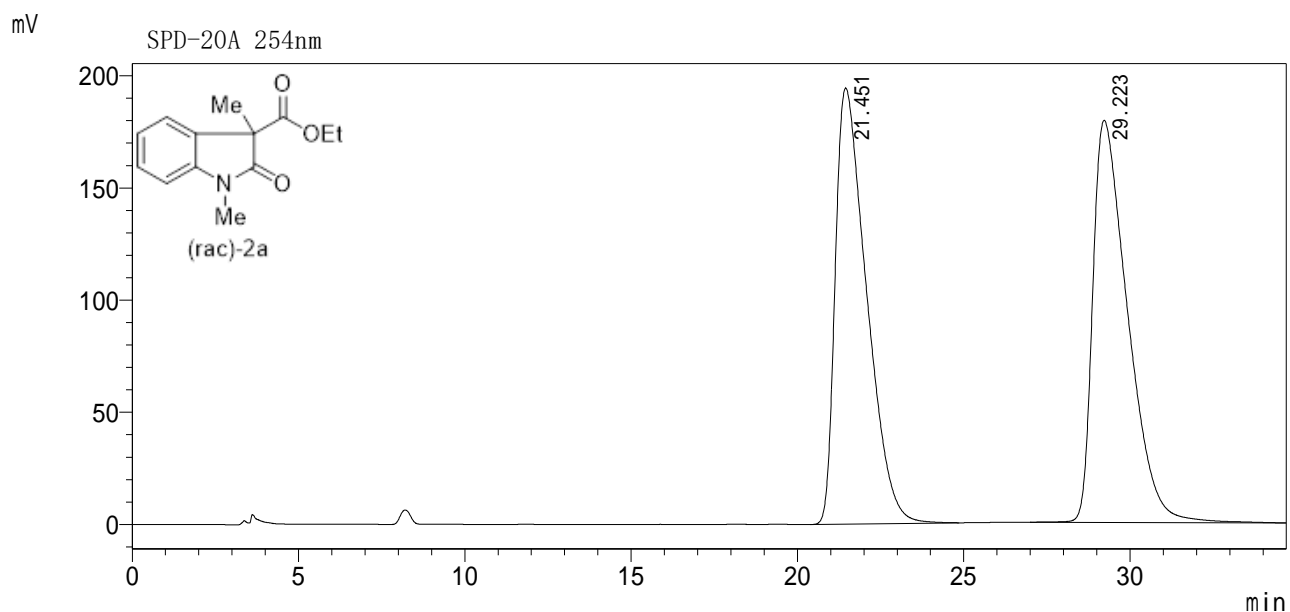

SPD-20A

| Entry | RT[min] | Area     | Height | Area%  |
|-------|---------|----------|--------|--------|
| 1     | 21.451  | 12683267 | 194390 | 49.256 |
| 2     | 29.223  | 13066311 | 179290 | 50.744 |
| Sum   |         | 25749577 | 373680 |        |

SHIMADZU LabSolutions HPLC Report

< Sample information >

Sample name : DZJC118-2-C-OJ-1%  
 Data name : 2a--DZJC118-2-yizhiCHIRAL-OJ-1%.lcd  
 Acq. Method : OJ-H-1%.lcm  
 Location : 1-1  
 Sample Type : unknown  
 : 1 uL  
 Ana. Date : 2020/8/6 18:44:24  
 Analyst : System Administrator  
 Pro. Date : 2020/8/6 22:52:40  
 Processor : System Administrator

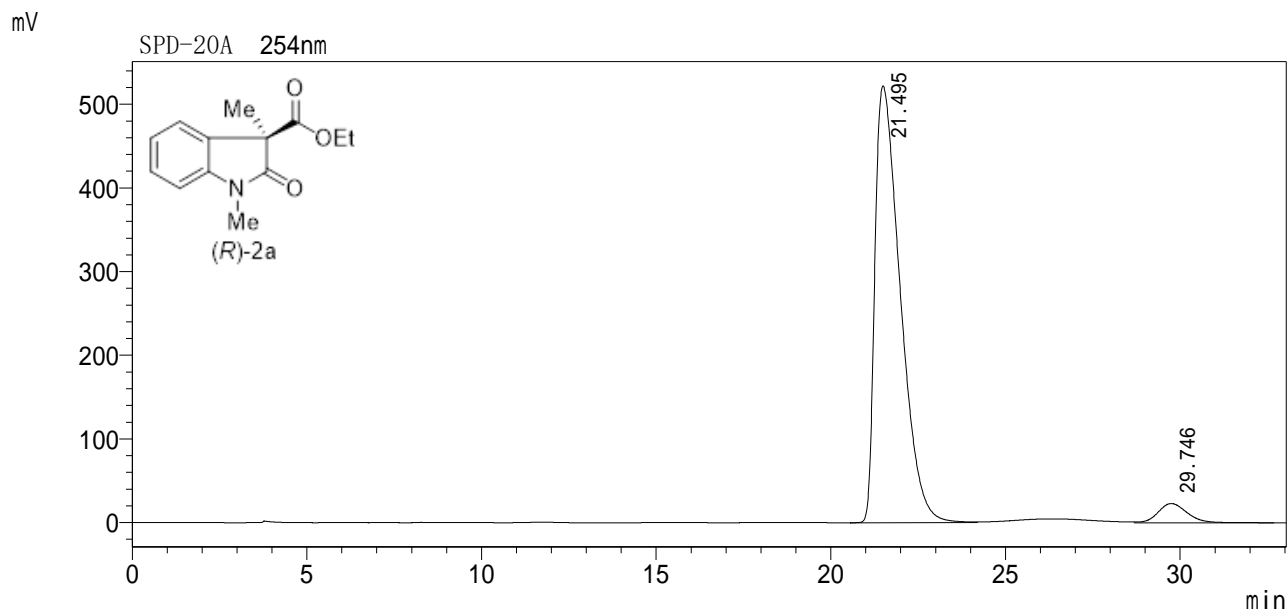

SPD-20A

| Entry | RT[min] | Area     | Height | Area%  |
|-------|---------|----------|--------|--------|
| 1     | 21.495  | 26280004 | 521999 | 95.216 |
| 2     | 29.746  | 1320441  | 22920  | 4.784  |
| Sum   |         | 27600445 | 544918 |        |

SHIMADZU  
LabSolutions HPLC Report

< Sample information >

Sample name : DZJC105-1-Rac-AD-1%  
 Data name : 2b--DZJC124-4-jiazhiRac-AD-1%.lcd  
 Acq. Method : AD-H-1%.lcm  
 Location : 1-1  
 : 1 uL  
 Ana. Date : 2020/7/27 11:04:15  
 Pro. Date : 2020/7/27 16:53:00  
 Sample Type : unknown  
 Analyst : System Administrator  
 Processor : System Administrator

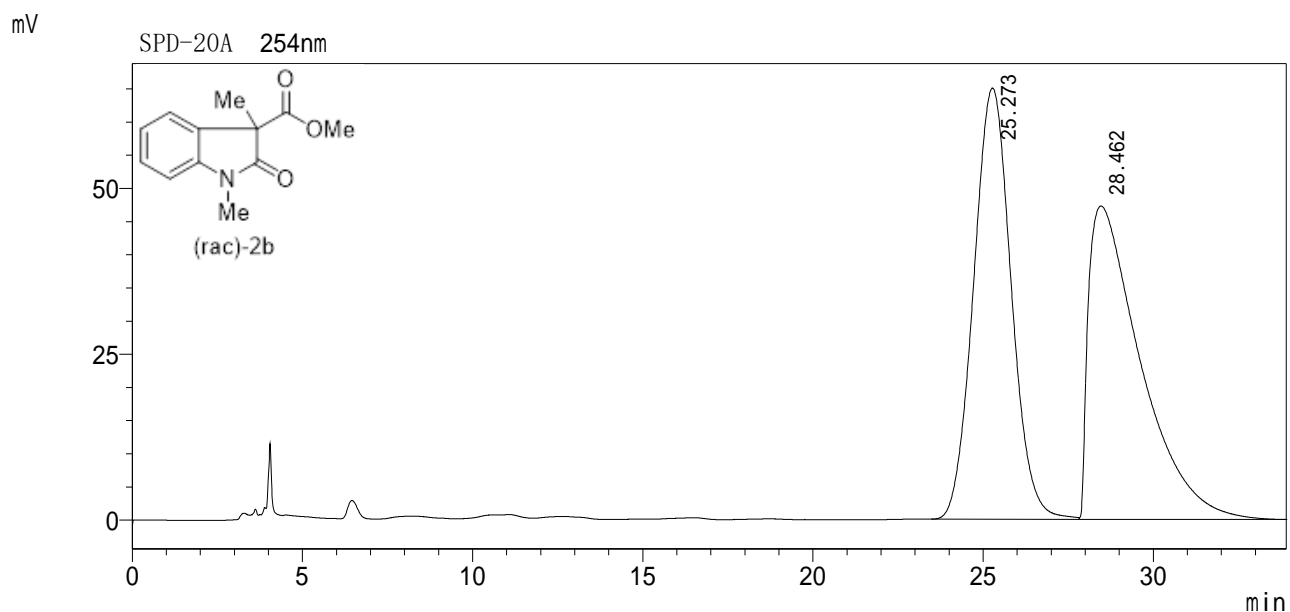

SPD-20A

| Entry | RT[min] | Area     | Height | Area%  |
|-------|---------|----------|--------|--------|
| 1     | 25.273  | 4995010  | 65000  | 49.853 |
| 2     | 28.462  | 5024419  | 47246  | 50.147 |
| Sum   |         | 10019428 | 112246 |        |

SHIMADZU LabSolutions HPLC Report

< Sample information >

Sample name : DZJC124-4-C-AD-1%  
 Data name : 2b--DZJC124-4-jiazhiCHIRAL-AD-1%.lcd  
 Acq. Method : AD-H-1%.lcm  
 Location : 1-1  
 : 1 uL  
 Sample Type : unknown  
 Ana. Date : 2020/8/14 15:15:57  
 Pro. Date : 2020/8/15 9:29:45  
 Analyst : System Administrator  
 Processor : System Administrator

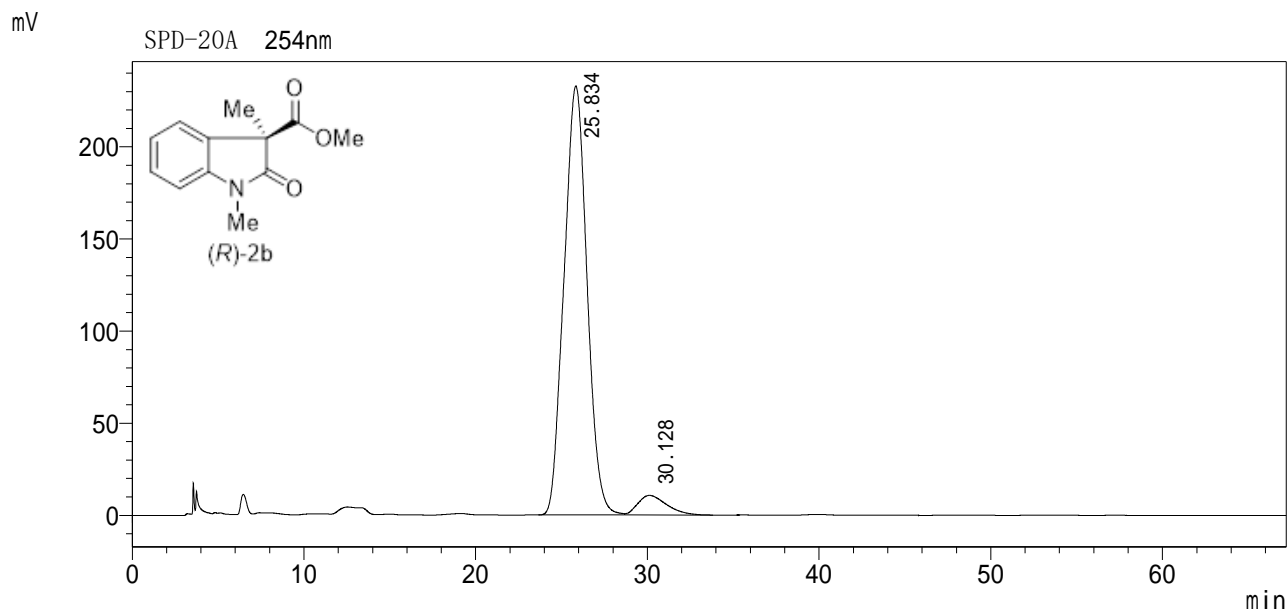

SPD-20A

| Entry | RT[min] | Area     | Height | Area%  |
|-------|---------|----------|--------|--------|
| 1     | 25.834  | 21662858 | 232827 | 94.563 |
| 2     | 30.128  | 1245559  | 10645  | 5.437  |
| Sum   |         | 22908417 | 243472 |        |



SHIMADZU LabSolutions HPLC Report

< Sample information >

Sample name : DZJC105-3-rac.1-AS-1%  
 Data name : 2c--DZJC118-3-yibingzhiRAC-AS-1%.lcd  
 Acq. Method : AS-H-1%.lcm  
 Location : 1-1  
 Sample Type : unknown  
 : 1 uL  
 Ana. Date : 2020/7/26 19:45:20  
 Analyst : System Administrator  
 Pro. Date : 2020/7/26 20:47:58  
 Processor : System Administrator

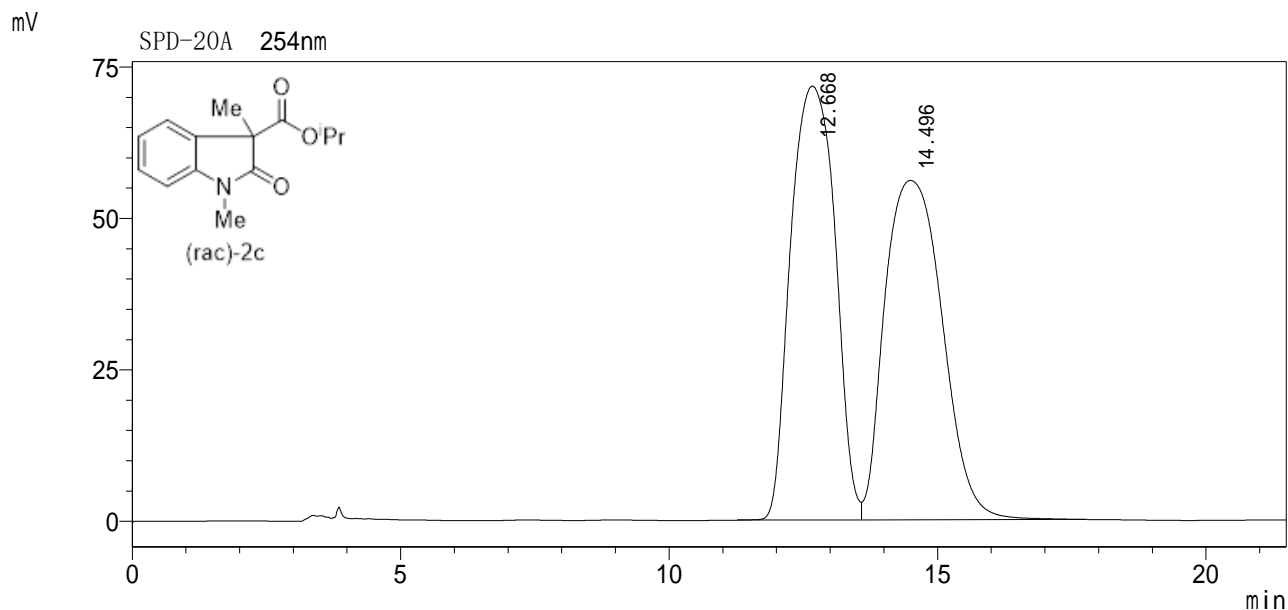

SPD-20A

| Entry | RT[min] | Area    | Height | Area%  |  |  |  |
|-------|---------|---------|--------|--------|--|--|--|
| 1     | 12.668  | 4146311 | 71645  | 49.719 |  |  |  |
| 2     | 14.496  | 4193226 | 56029  | 50.281 |  |  |  |
| Sum   |         | 8339536 | 127674 |        |  |  |  |

SHIMADZU LabSolutions HPLC Report

< Sample information >

Sample name : DZJC118-3-C-AS-1%  
 Data name : 2c--DZJC118-3-yibingzhiCHIRAL-AS-1%.lcd  
 Acq. Method : AS-H-1%.lcm  
 Location : 1-1  
 : 1 uL  
 Ana. Date : 2020/8/8 18:40:03  
 Pro. Date : 2020/8/8 19:08:21  
 Sample Type : unknown  
 Analyst : System Administrator  
 Processor : System Administrator

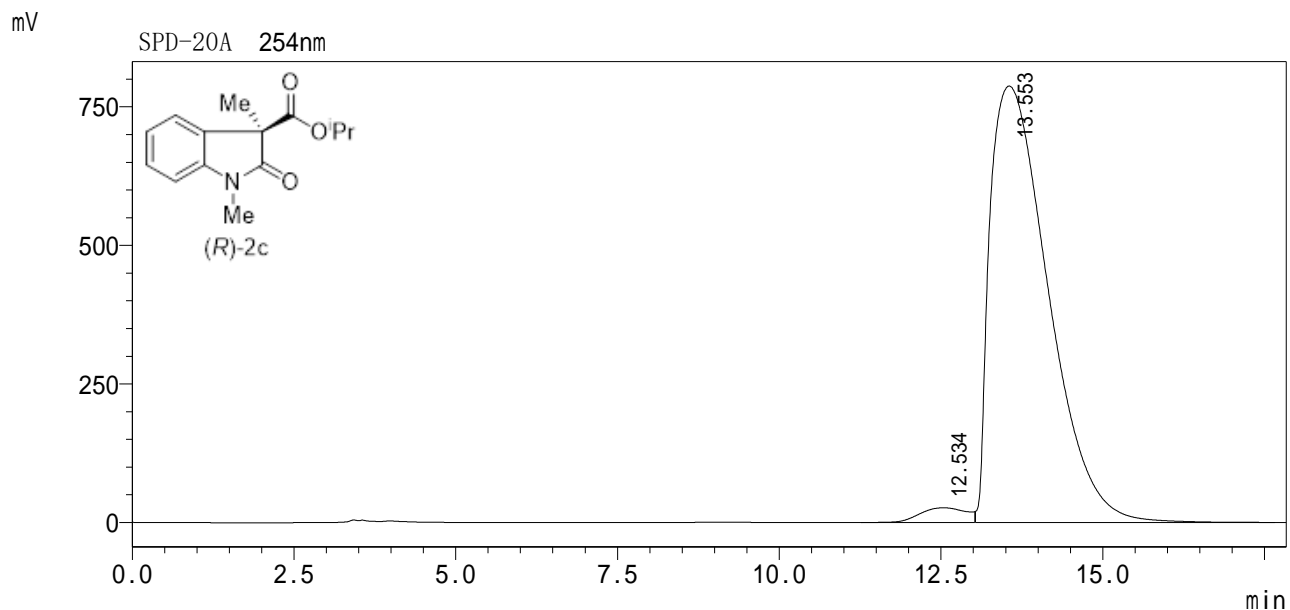

SPD-20A

| Entry | RT[min] | Area     | Height | Area%  |
|-------|---------|----------|--------|--------|
| 1     | 12.534  | 1347582  | 26749  | 2.663  |
| 2     | 13.553  | 49256715 | 787507 | 97.337 |
| Sum   |         | 50604296 | 814256 |        |

SHIMADZU LabSolutions HPLC Report

< Sample information >

Sample name : DZJC100-2-RAC-OJ-1%  
 Data name : 2d--DZJC116-1-wuqudaiRAC-OJ-1%.lcd  
 Acq. Method : OJ-H-1%-50min.lcm  
 Location : 1-1  
 : 1 uL  
 Ana. Date : 2020/7/24 14:38:14  
 Pro. Date : 2020/7/24 21:49:21  
 Sample Type : unknown  
 Analyst : System Administrator  
 Processor : System Administrator

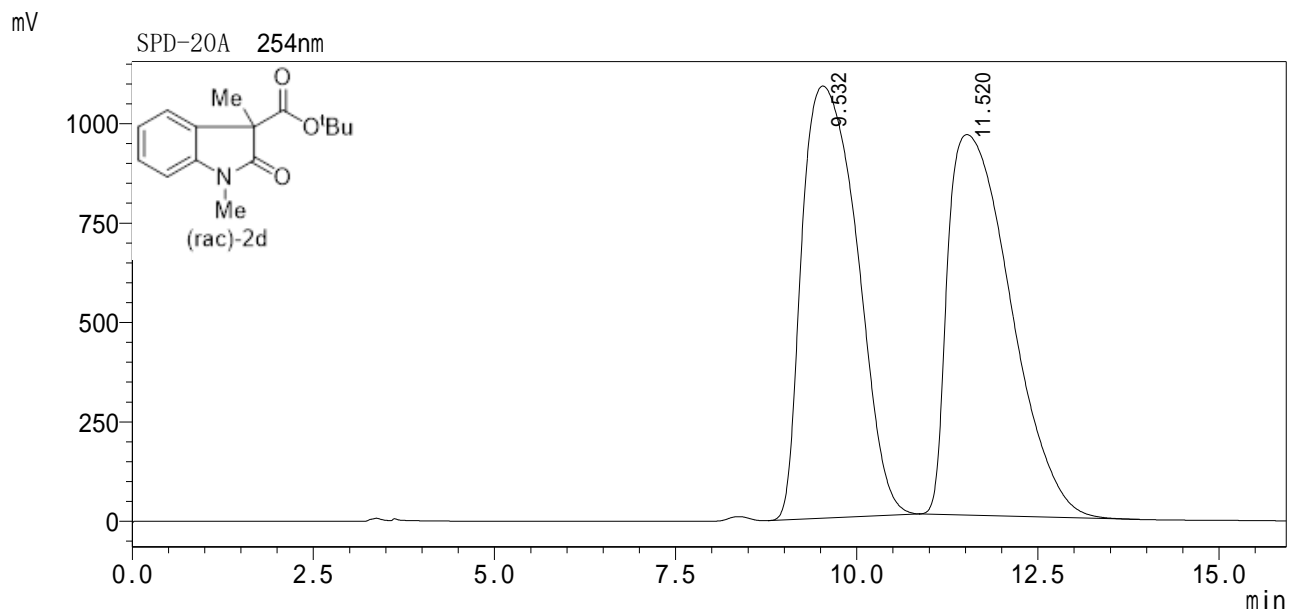

SPD-20A

| Entry | RT[min] | Area      | Height  | Area%  |
|-------|---------|-----------|---------|--------|
| 1     | 9.532   | 57572502  | 1087085 | 49.826 |
| 2     | 11.520  | 57975508  | 957081  | 50.174 |
| Sum   |         | 115548010 | 2044166 |        |

SHIMADZU LabSolutions HPLC Report

< Sample information >

Sample name : DZJC116-1-CHIRAL-OJ-1%  
 Data name : 2d--DZJC116-1-wuqudaiCHIRAL-OJ-1%.lcd  
 Acq. Method : OJ-H-1%.lcm  
 Location : 1-1  
 Sample Type : unknown  
 : 1 uL  
 Ana. Date : 2020/8/5 20:08:13  
 Analyst : System Administrator  
 Pro. Date : 2020/8/5 20:24:20  
 Processor : System Administrator

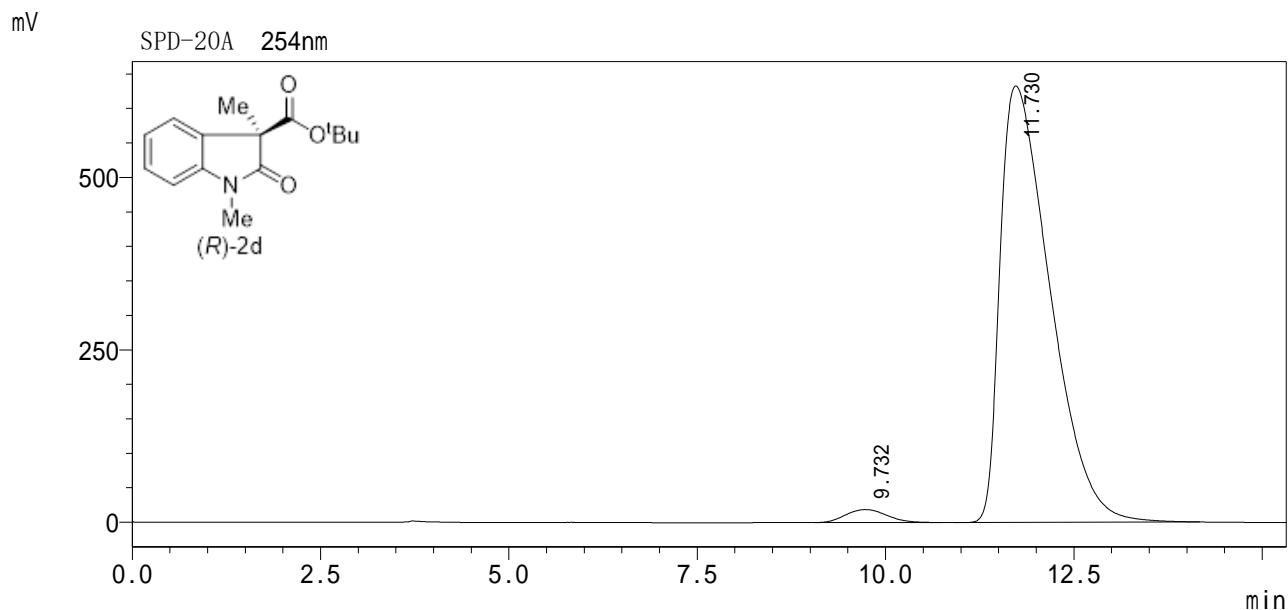

SPD-20A

| Entry | RT[min] | Area     | Height | Area%  |  |  |  |
|-------|---------|----------|--------|--------|--|--|--|
| 1     | 9.732   | 717767   | 18843  | 2.398  |  |  |  |
| 2     | 11.730  | 29210062 | 632775 | 97.602 |  |  |  |
| Sum   |         | 29927829 | 651618 |        |  |  |  |

SHIMADZU LabSolutions HPLC Report

< Sample information >

Sample name : dzjd007-r-OD-1%  
 Data name : 2e--dzjd007-danshangxibingjiRAC-OD-1%.lcd  
 Acq. Method : OD-H-1%.lcm  
 Location : 1-1  
 Sample Type : unknown  
 : 1 uL  
 Ana. Date : 2020/9/21 21:28:21  
 Analyst : System Administrator  
 Pro. Date : 2020/9/21 22:05:42  
 Processor : System Administrator

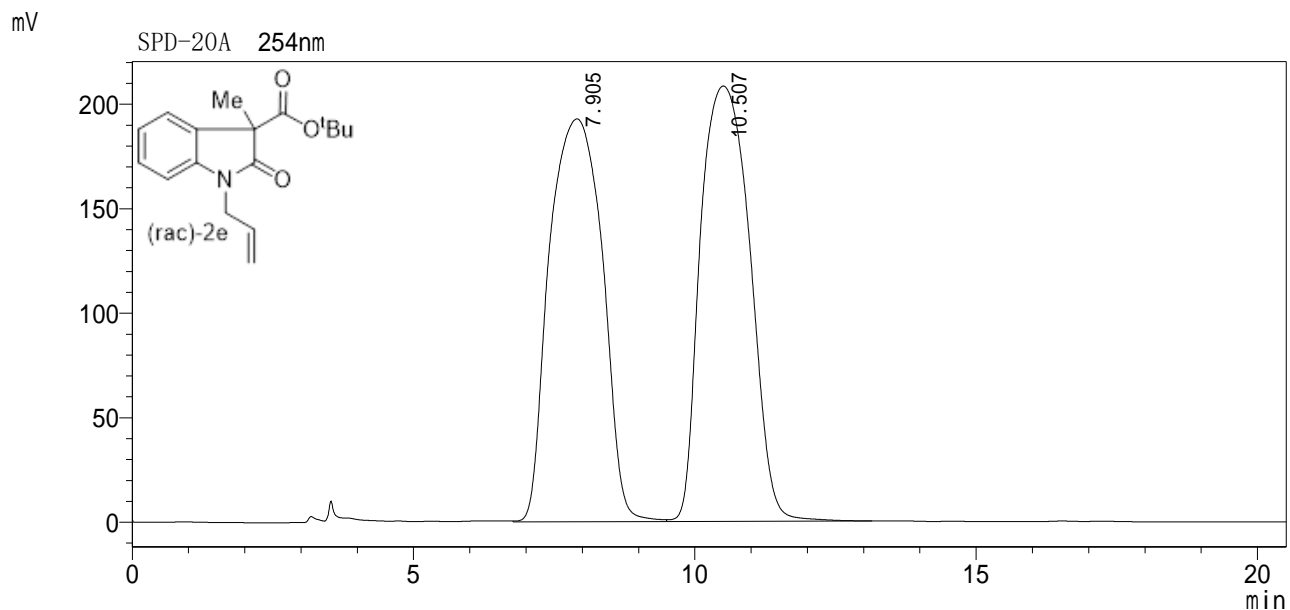

SPD-20A

| Entry | RT[min] | Area     | Height | Area%  |
|-------|---------|----------|--------|--------|
| 1     | 7.905   | 12668693 | 192791 | 49.849 |
| 2     | 10.507  | 12745651 | 208292 | 50.151 |
| Sum   |         | 25414344 | 401084 |        |

SHIMADZU LabSolutions HPLC Report

< Sample information >

Sample name : dzjd007-C-OD-1%  
 Data name : 2e--dzjd007-danshangxibingjiCHIRAL-OD-1%.lcd  
 Acq. Method : OD-H-1%.lcm  
 Location : 1-1  
 Sample Type : unknown  
 : 1 uL  
 Ana. Date : 2020/9/21 21:49:57  
 Analyst : System Administrator  
 Pro. Date : 2020/9/21 22:05:37  
 Processor : System Administrator

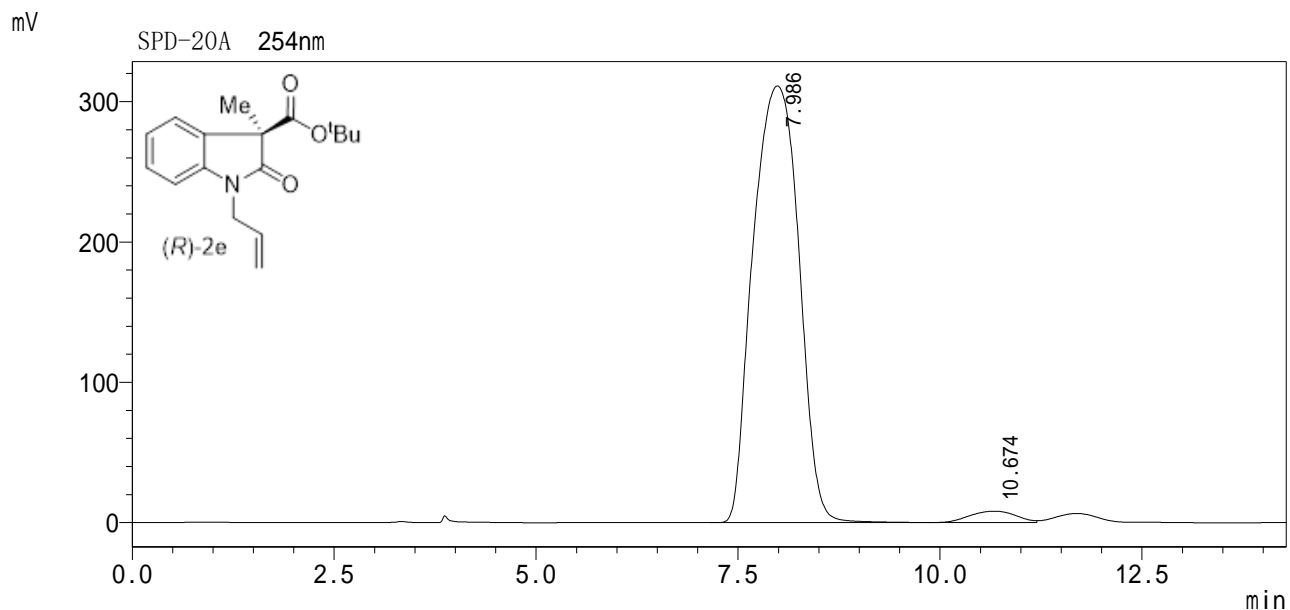

SPD-20A

| Entry | RT[min] | Area     | Height | Area%  |
|-------|---------|----------|--------|--------|
| 1     | 7.986   | 12323709 | 311114 | 97.484 |
| 2     | 10.674  | 318079   | 8025   | 2.516  |
| Sum   |         | 12641788 | 319139 |        |

SHIMADZU LabSolutions HPLC Report

< Sample information >

Sample name : dzjd031-r-OD-1%  
 Data name : 2f--dzjd031-r-OD-1%.lcd  
 Acq. Method : OD-H-1%.lcm  
 Location : 1-1  
 : 1 uL  
 Ana. Date : 2020/11/3 15:24:58 : Analyst : System Administrator  
 Pro. Date : 2020/11/3 19:33:22 : Processor : System Administrator

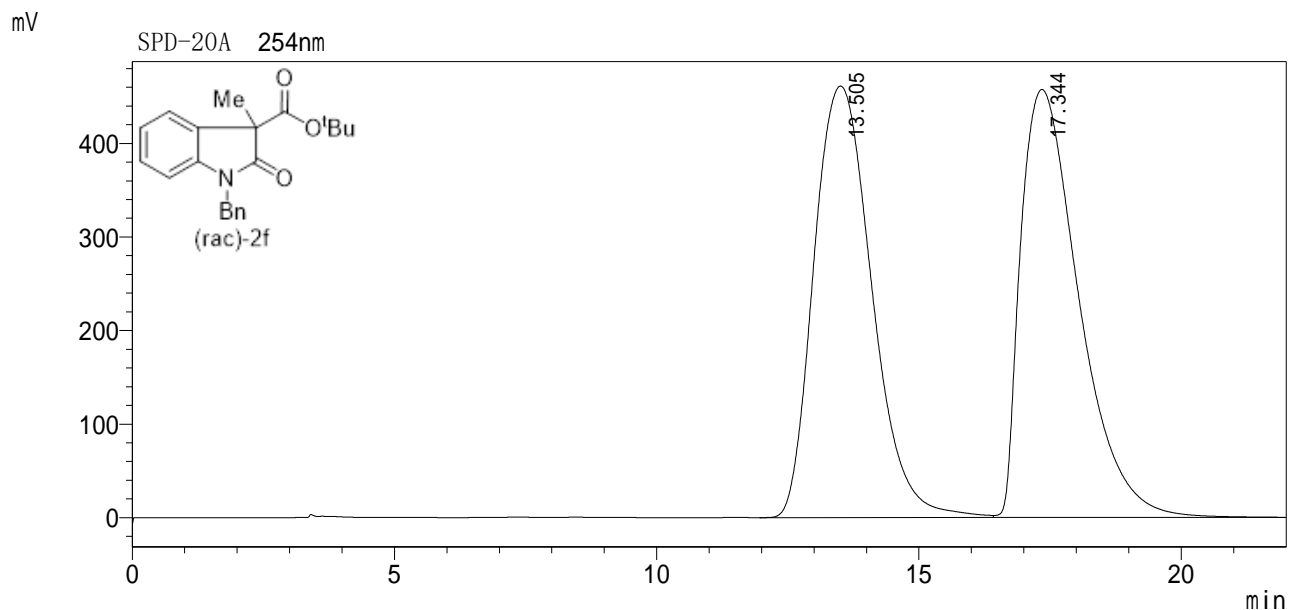

SPD-20A

| Entry | RT[min] | Area     | Height | Area%  |  |  |  |
|-------|---------|----------|--------|--------|--|--|--|
| 1     | 13.505  | 35437308 | 461217 | 50.175 |  |  |  |
| 2     | 17.344  | 35189720 | 457437 | 49.825 |  |  |  |
| Sum   |         | 70627028 | 918654 |        |  |  |  |

SHIMADZU LabSolutions HPLC Report

< Sample information >

Sample name : DZJD031-C-2-OD-1%  
 Data name : 2f--DZJD031-C-2-OD-1%.lcd  
 Acq. Method : OD-H-1%.lcm  
 Location : 1-1  
 : 1 uL  
 Ana. Date : 2020/11/9 19:42:51  
 Pro. Date : 2020/11/9 20:10:59  
 Sample Type : unknown  
 Analyst : System Administrator  
 Processor : System Administrator

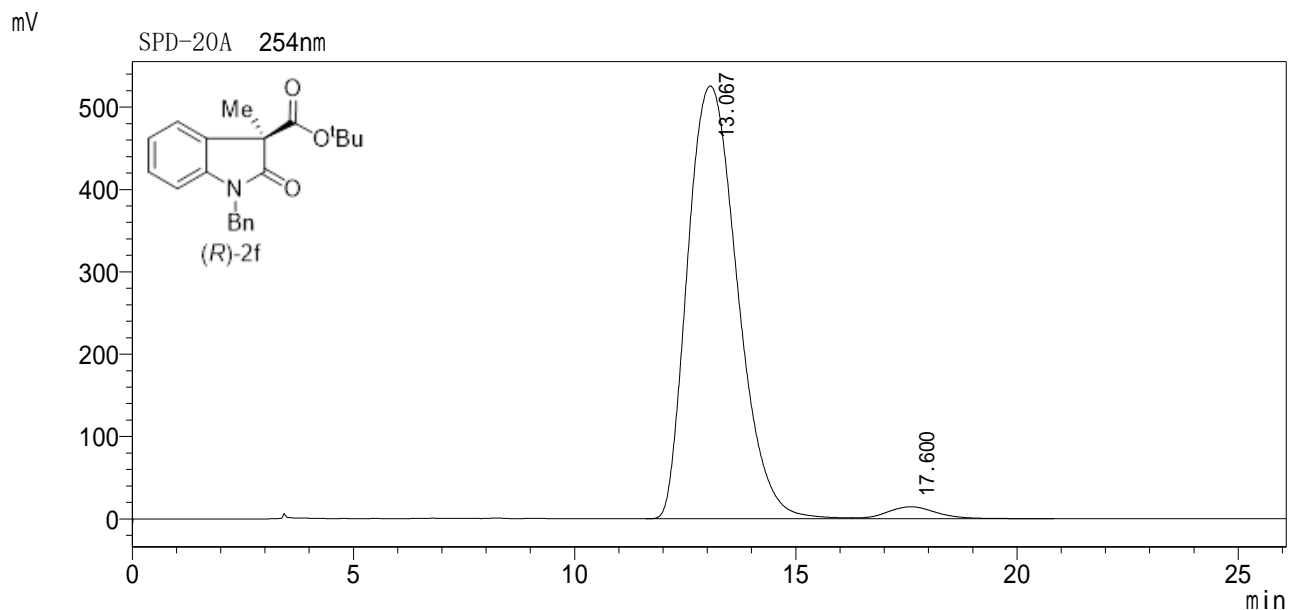

SPD-20A

| Entry | RT[min] | Area     | Height | Area%  |
|-------|---------|----------|--------|--------|
| 1     | 13.067  | 41136533 | 525403 | 97.354 |
| 2     | 17.600  | 1118050  | 14499  | 2.646  |
| Sum   |         | 42254583 | 539902 |        |



SHIMADZU LabSolutions HPLC Report

< Sample information >

Sample name : DZJC118-1-RAC-OJ-1%  
 Data name : 2g--DZJC118-1-jiayangjiRAC-OJ-1%.lcd  
 Acq. Method : OJ-H-1%.lcm  
 Location : 1-1  
 Sample Type : unknown  
 : 1 uL  
 Ana. Date : 2020/8/6 18:12:07  
 Analyst : System Administrator  
 Pro. Date : 2020/8/6 22:53:07  
 Processor : System Administrator

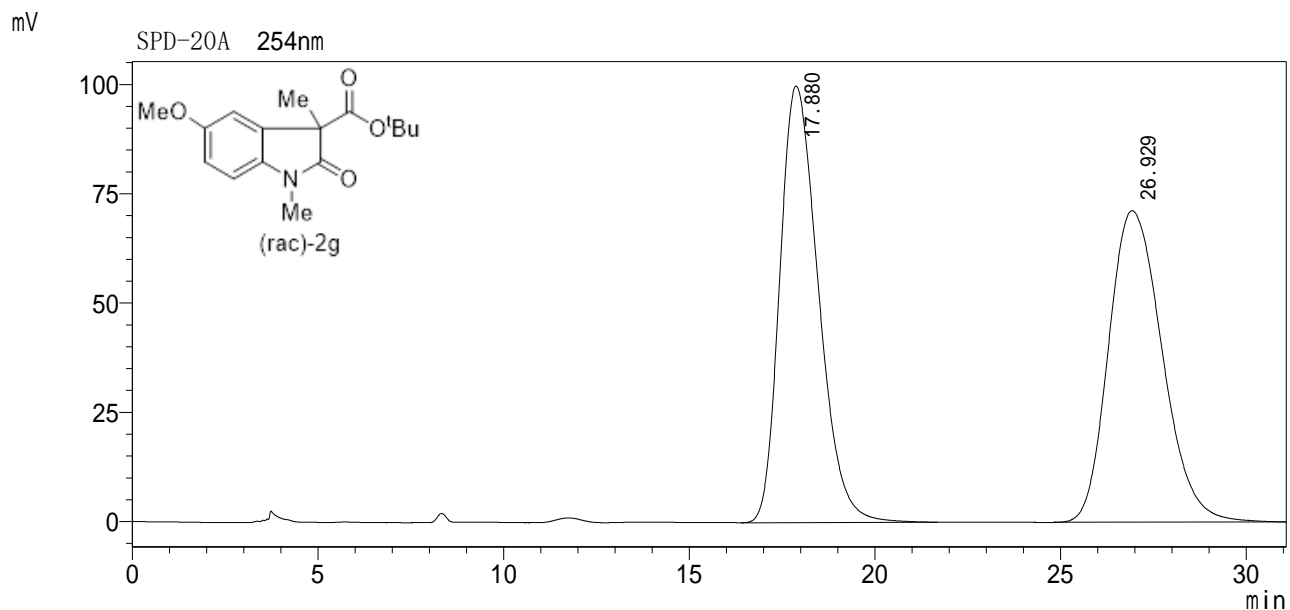

SPD-20A

| Entry | RT[min] | Area     | Height | Area%  |
|-------|---------|----------|--------|--------|
| 1     | 17.880  | 7218263  | 99889  | 50.201 |
| 2     | 26.929  | 7160459  | 71276  | 49.799 |
| Sum   |         | 14378722 | 171165 |        |

SHIMADZU LabSolutions HPLC Report

< Sample information >

Sample name : DZJC118-1-C-OJ-1%  
 Data name : 2g--DZJC118-1-jiayangjiCHIRAL-OJ-1%.lcd  
 Acq. Method : OJ-H-1%.lcm  
 Location : 1-1  
 Sample Type : unknown  
 : 1 uL  
 Ana. Date : 2020/8/6 17:05:28  
 Analyst : System Administrator  
 Pro. Date : 2020/8/6 22:53:13  
 Processor : System Administrator

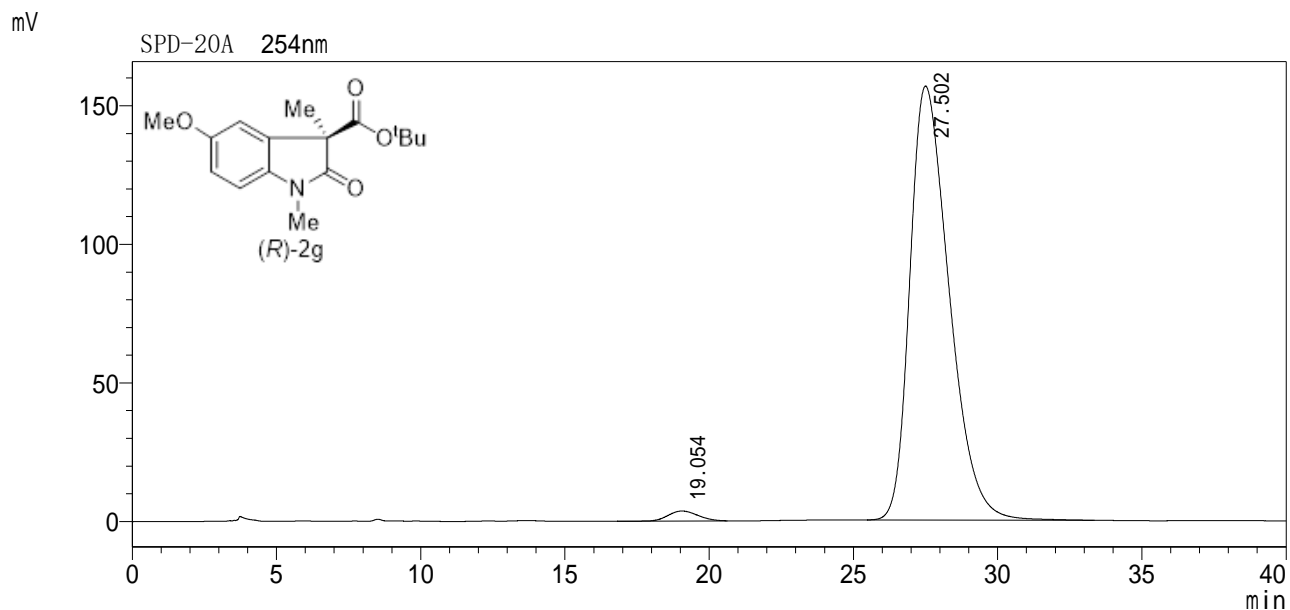

SPD-20A

| Entry | RT[min] | Area     | Height | Area%  |
|-------|---------|----------|--------|--------|
| 1     | 19.054  | 254446   | 3584   | 1.689  |
| 2     | 27.502  | 14810572 | 156590 | 98.311 |
| Sum   |         | 15065018 | 160174 |        |

SHIMADZU LabSolutions HPLC Report

< Sample information >

Sample name : DZJC114-1-anduijiajiRAC-OJ-1%  
 Data name : 2h--DZJC114-1-anduijiajiRAC-OJ-1%.lcd  
 Acq. Method : OJ-H-1%.lcm  
 Location : 1-1  
 Sample Type : unknown  
 : 1 uL  
 Ana. Date : 2020/7/21 16:47:34  
 Analyst : System Administrator  
 Pro. Date : 2020/7/23 9:47:42  
 Processor : System Administrator

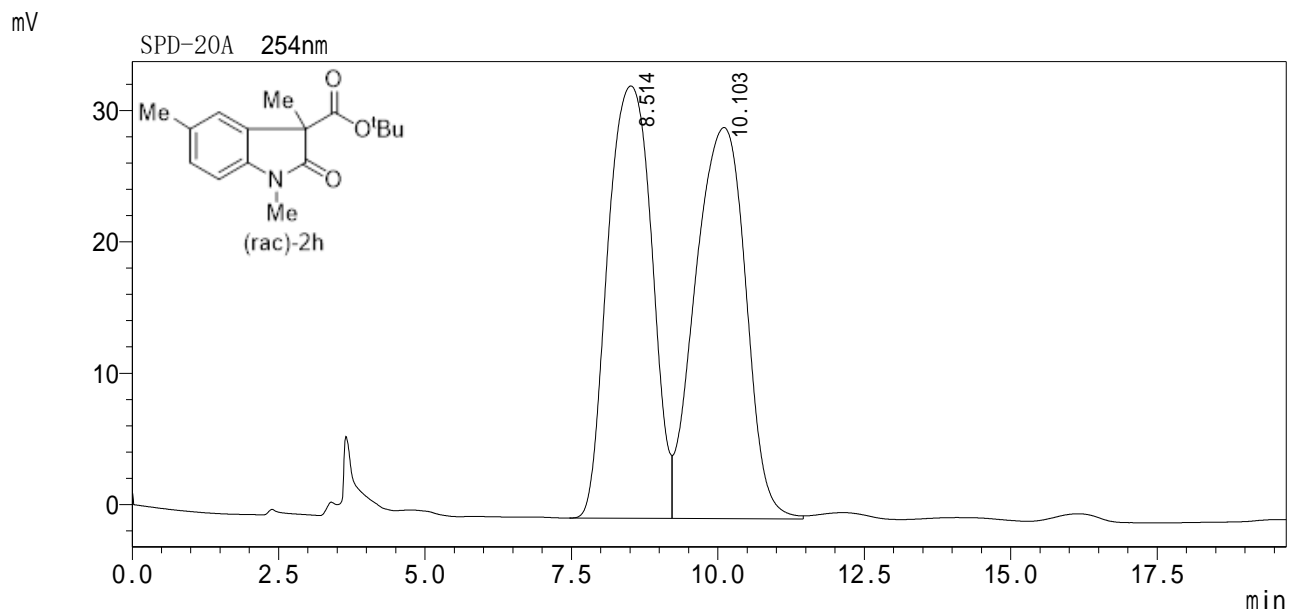

SPD-20A

| Entry | RT[min] | Area    | Height | Area%  |  |  |  |
|-------|---------|---------|--------|--------|--|--|--|
| 1     | 8.514   | 1728969 | 32912  | 49.144 |  |  |  |
| 2     | 10.103  | 1789219 | 29792  | 50.856 |  |  |  |
| Sum   |         | 3518188 | 62704  |        |  |  |  |

SHIMADZU LabSolutions HPLC Report

< Sample information >

Sample name : dzjc114-1-chiral-oj-1%  
 Data name : 2h--DZJC114-1-anduijiajiCHIRAL-OJ-1%.lcd  
 Acq. Method : OJ-H-1%.lcm  
 Location : 1-1  
 : 1 uL  
 Ana. Date : 2020/8/5 9:05:40  
 Pro. Date : 2020/8/5 9:22:13  
 Sample Type : unknown  
 Analyst : System Administrator  
 Processor : System Administrator

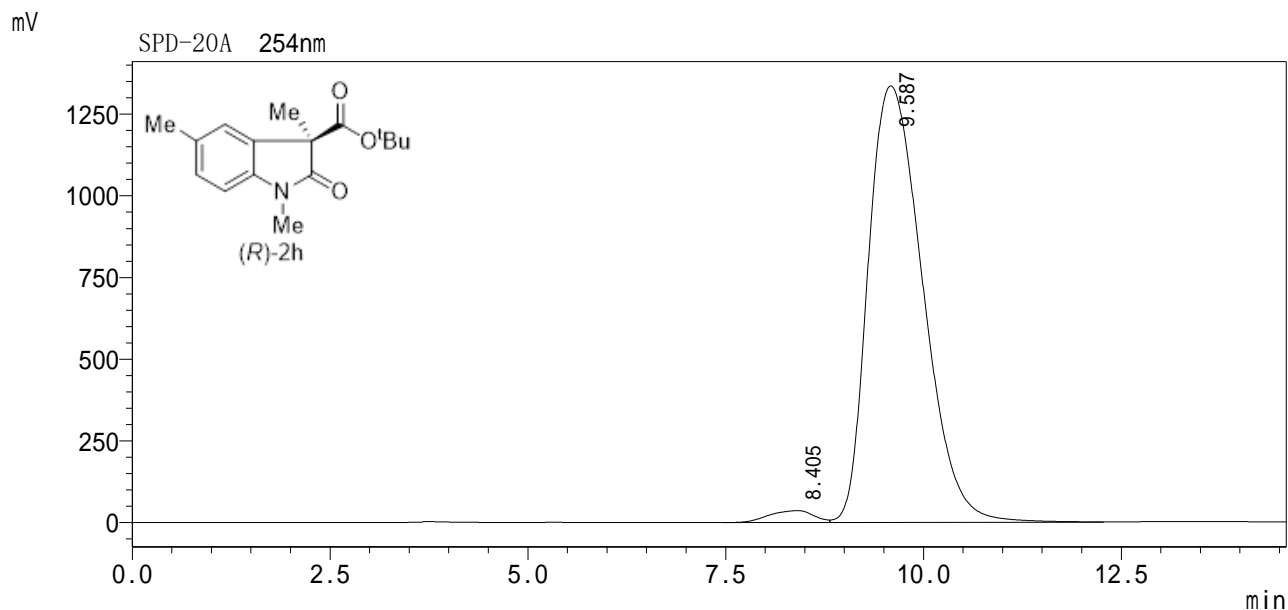

SPD-20A

| Entry | RT[min] | Area     | Height  | Area%  |  |  |  |
|-------|---------|----------|---------|--------|--|--|--|
| 1     | 8.405   | 1406843  | 36319   | 2.153  |  |  |  |
| 2     | 9.587   | 63931566 | 1334998 | 97.847 |  |  |  |
| Sum   |         | 65338408 | 1371317 |        |  |  |  |

SHIMADZU LabSolutions HPLC Report

< Sample information >

Sample name : DZJC112-2-RAC-IC-5%  
 Data name : 2i--DZJC114-3-shudingjiRAC-IC-5%.lcd  
 Acq. Method : IC-H-5%.lcm  
 Location : 1-1  
 Sample Type : unknown  
 : 1 uL  
 Ana. Date : 2020/8/5 16:48:52  
 Analyst : System Administrator  
 Pro. Date : 2020/8/5 20:23:08  
 Processor : System Administrator

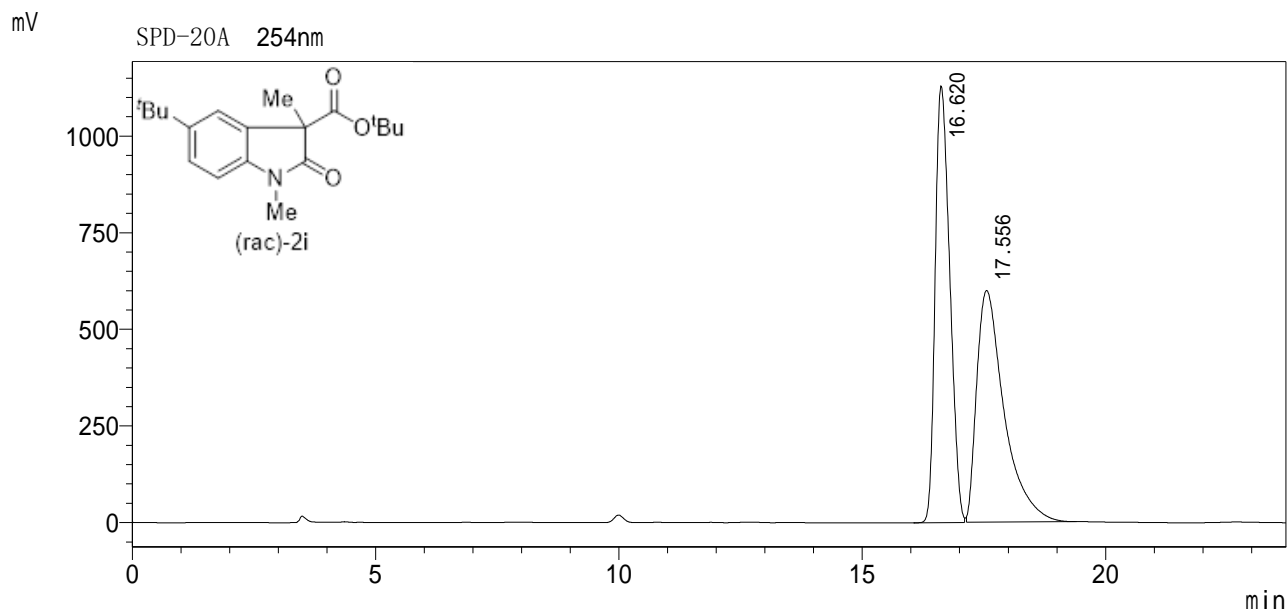

SPD-20A

| Entry | RT[min] | Area     | Height  | Area%  |
|-------|---------|----------|---------|--------|
| 1     | 16.620  | 23593159 | 1129843 | 50.125 |
| 2     | 17.556  | 23475774 | 599311  | 49.875 |
| Sum   |         | 47068933 | 1729155 |        |

SHIMADZU LabSolutions HPLC Report

< Sample information >

Sample name : DZJ-SHUDINGJI-C-IC-5%  
 Data name : 2i--DZJ-SHUDINGJI-C-IC-5%.lcd  
 Acq. Method : IC-H-5%.lcm  
 Location : 1-1 Sample Type : unknown  
 : 1 uL  
 Ana. Date : 2020/11/19 20:23:43 Analyst : System Administrator  
 Pro. Date : 2020/11/19 21:04:58 Processor : System Administrator

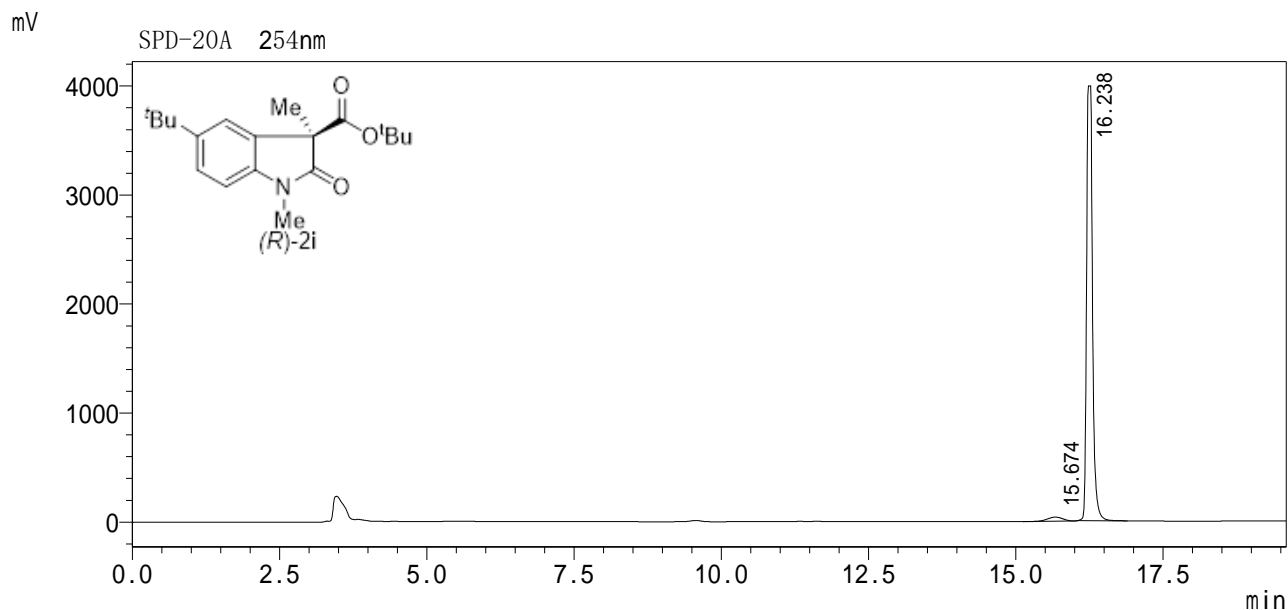

SPD-20A

| Entry | RT[min] | Area     | Height  | Area%  |
|-------|---------|----------|---------|--------|
| 1     | 15.674  | 625165   | 36526   | 2.201  |
| 2     | 16.238  | 27772304 | 3987053 | 97.799 |
| Sum   |         | 28397469 | 4023579 |        |

SHIMADZU LabSolutions HPLC Report

< Sample information >

Sample name : DZJC120-2.1-RAC-OD-1%  
 Data name : 2j--DZJC122-2-anduixiuRAC-OD-1%.lcd  
 Acq. Method : OD-H-1%.lcm  
 Location : 1-1  
 Sample Type : unknown  
 : 1 uL  
 Ana. Date : 2020/8/9 15:17:14  
 Analyst : System Administrator  
 Pro. Date : 2020/8/9 17:20:27  
 Processor : System Administrator

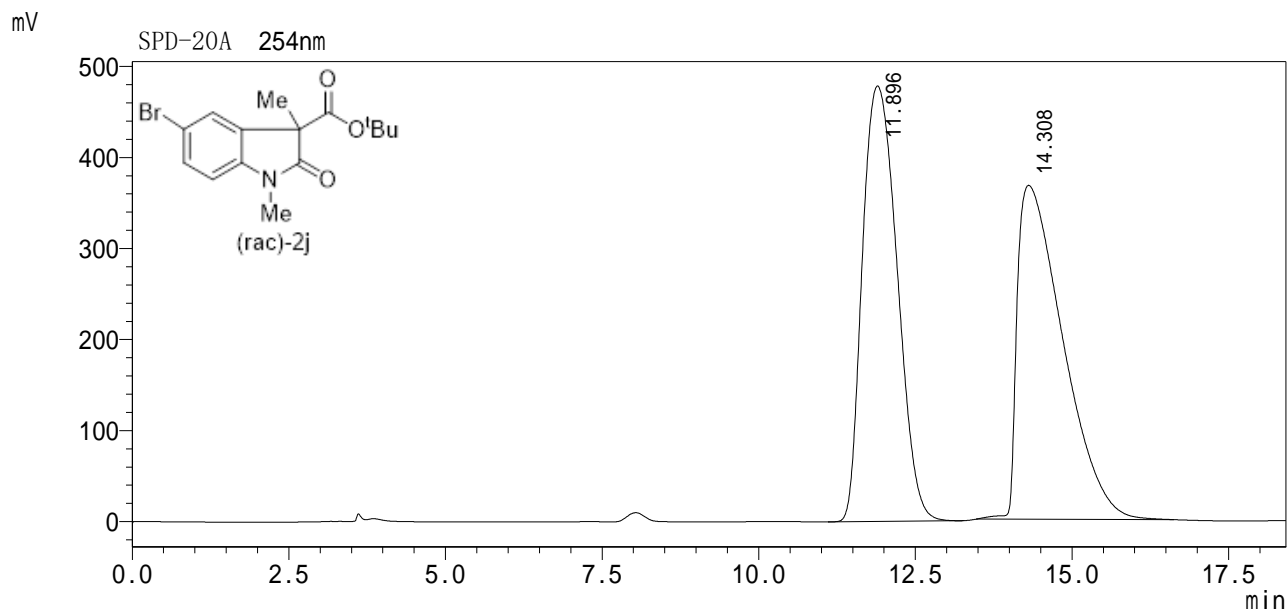

SPD-20A

| Entry | RT[min] | Area     | Height | Area%  |
|-------|---------|----------|--------|--------|
| 1     | 11.896  | 18493582 | 478310 | 49.861 |
| 2     | 14.308  | 18596831 | 366818 | 50.139 |
| Sum   |         | 37090413 | 845128 |        |

SHIMADZU LabSolutions HPLC Report

< Sample information >

Sample name : DZJC122-2-C-OD-1%  
 Data name : 2j--DZJC122-2-anduixiuCHIRAL-OD-1%.lcd  
 Acq. Method : OD-H-1%.lcm  
 Location : 1-1  
 : 1 uL  
 Sample Type : unknown  
 Ana. Date : 2020/8/10 19:35:21  
 Analyst : System Administrator  
 Pro. Date : 2020/8/10 22:26:48  
 Processor : System Administrator

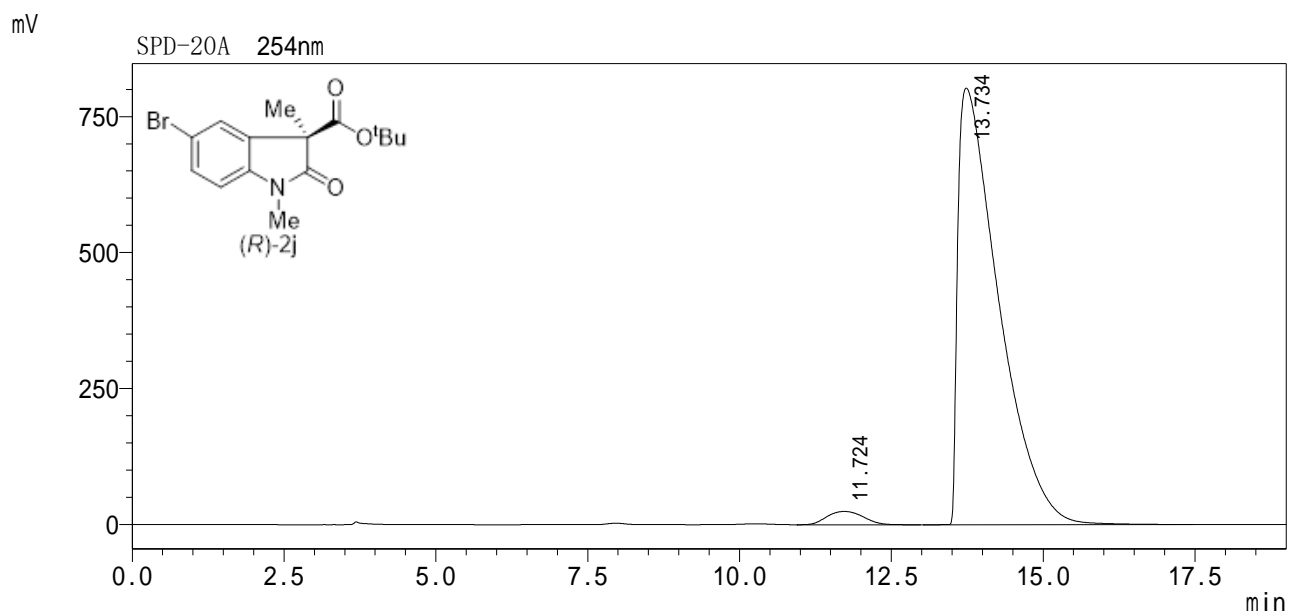

SPD-20A

| Entry | RT[min] | Area     | Height | Area%  |
|-------|---------|----------|--------|--------|
| 1     | 11.724  | 1018956  | 24442  | 2.642  |
| 2     | 13.734  | 37542354 | 802866 | 97.358 |
| Sum   |         | 38561310 | 827308 |        |



SHIMADZU LabSolutions HPLC Report

< Sample information >

Sample name : DZJC113-3-RAC-OJ-30%  
 Data name : 2k--DZJC113-3-qingjiRAC-OJ-30%.lcd  
 Acq. Method : OJ-H-30%.lcm  
 Location : 1-1  
 Sample Type : unknown  
 : 1 uL  
 Ana. Date : 2020/8/2 17:24:20  
 Analyst : System Administrator  
 Pro. Date : 2020/8/2 18:25:29  
 Processor : System Administrator

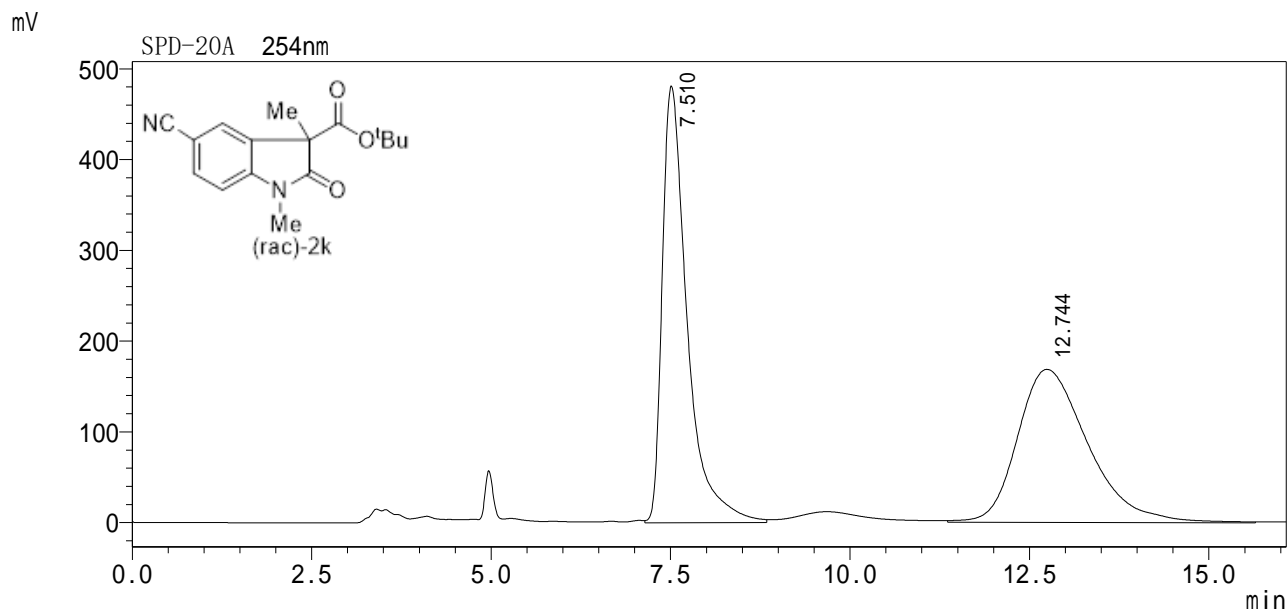

SPD-20A

| Entry | RT[min] | Area     | Height | Area%  |
|-------|---------|----------|--------|--------|
| 1     | 7.510   | 11613557 | 481045 | 50.069 |
| 2     | 12.744  | 11581447 | 168655 | 49.931 |
| Sum   |         | 23195003 | 649699 |        |

SHIMADZU LabSolutions HPLC Report

< Sample information >

Sample name : DZJC113-3-C-OJ-30%  
 Data name : 2k--DZJC113-3-qingjiCHIRAL-OJ-30%.lcd  
 Acq. Method : OJ-H-30%.lcm  
 Location : 1-1  
 Sample Type : unknown  
 : 1 uL  
 Ana. Date : 2020/8/2 17:41:21  
 Analyst : System Administrator  
 Pro. Date : 2020/8/2 18:25:24  
 Processor : System Administrator

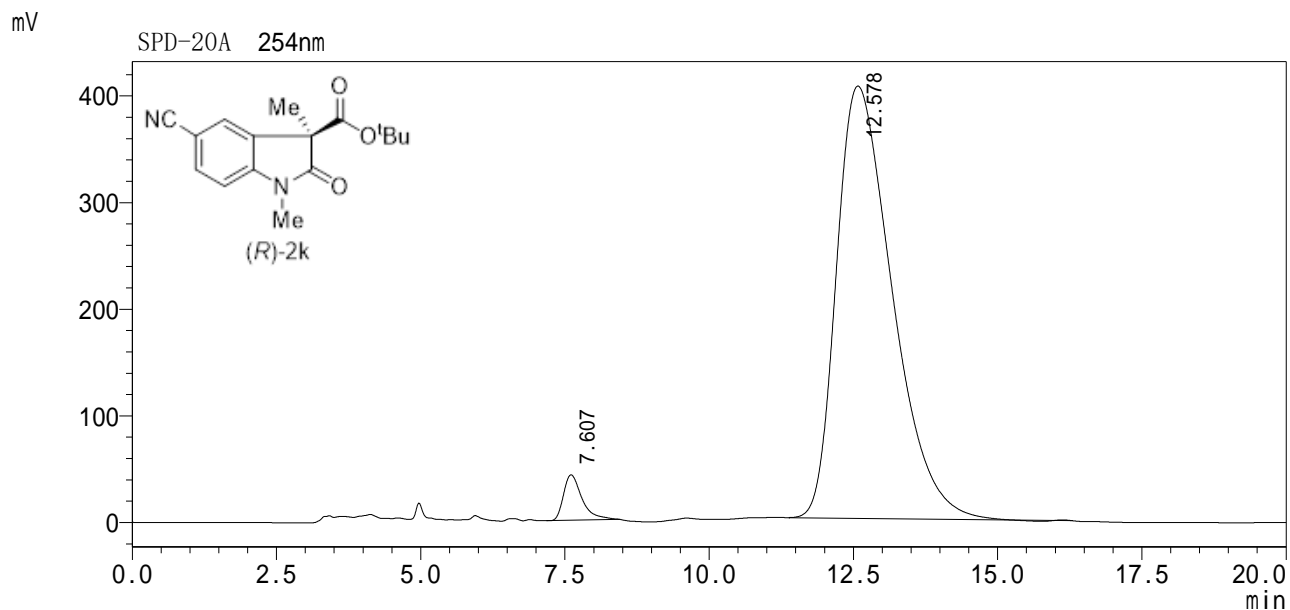

SPD-20A

| Entry | RT[min] | Area     | Height | Area%  |
|-------|---------|----------|--------|--------|
| 1     | 7.607   | 939833   | 42471  | 3.337  |
| 2     | 12.578  | 27220986 | 405439 | 96.663 |
| Sum   |         | 28160819 | 447910 |        |

SHIMADZU LabSolutions HPLC Report

< Sample information >

Sample name : DZJC122-3-R-AD-1%  
 Data name : 21--DZJC122-3-sanfujiajiRAC-AD-1%.lcd  
 Acq. Method : AD-H-1%.lcm  
 Location : 1-1  
 : 1 uL  
 Ana. Date : 2020/8/10 18:59:26  
 Pro. Date : 2020/8/10 22:26:55  
 Sample Type : unknown  
 Analyst : System Administrator  
 Processor : System Administrator

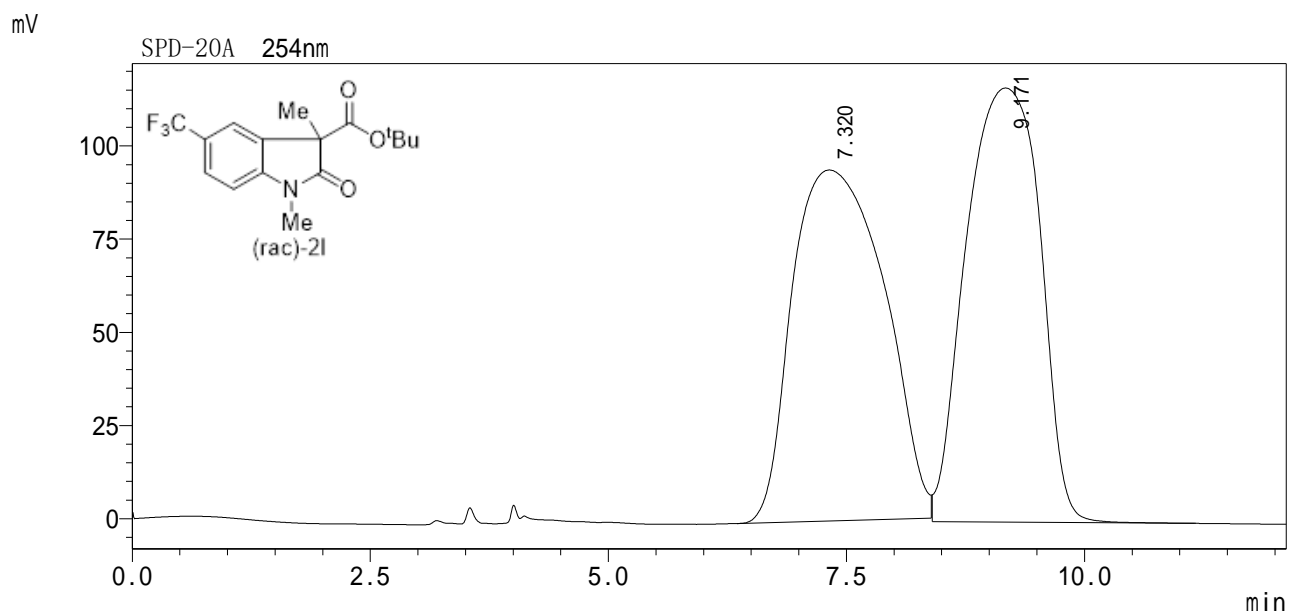

SPD-20A

| Entry | RT[min] | Area     | Height | Area%  |
|-------|---------|----------|--------|--------|
| 1     | 7.320   | 6344586  | 94156  | 50.168 |
| 2     | 9.171   | 6302195  | 116449 | 49.832 |
| Sum   |         | 12646780 | 210605 |        |

SHIMADZU LabSolutions HPLC Report

< Sample information >

Sample name : DZJC122-3-C-AD-1%  
 Data name : 21--DZJC122-3-sanfujiajiCHIRAL-AD-1%.lcd  
 Acq. Method : AD-H-1%.lcm  
 Location : 1-1  
 Sample Type : unknown  
 : 1 uL  
 Ana. Date : 2020/8/10 18:45:12  
 Analyst : System Administrator  
 Pro. Date : 2020/8/10 22:26:59  
 Processor : System Administrator

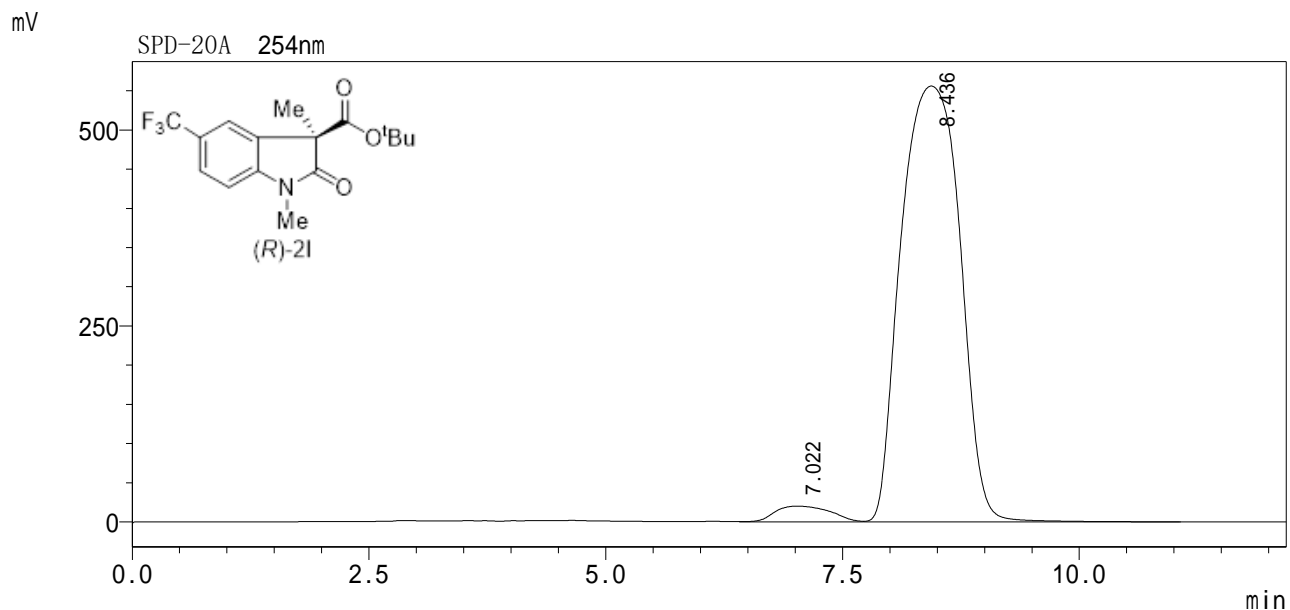

SPD-20A

| Entry | RT[min] | Area     | Height | Area%  |  |  |  |
|-------|---------|----------|--------|--------|--|--|--|
| 1     | 7.022   | 816526   | 20097  | 3.272  |  |  |  |
| 2     | 8.436   | 24141443 | 556019 | 96.728 |  |  |  |
| Sum   |         | 24957969 | 576116 |        |  |  |  |

SHIMADZU LabSolutions HPLC Report

< Sample information >

Sample name : DZJC115-4-R-OD-5%  
 Data name : 2m--DZJC121-3-xiaojiRAC-OD-5%.lcd  
 Acq. Method : OD-H-5%.lcm  
 Location : 1-1  
 Sample Type : unknown  
 : 1 uL  
 Ana. Date : 2020/8/8 20:55:38  
 Analyst : System Administrator  
 Pro. Date : 2020/8/8 21:35:34  
 Processor : System Administrator

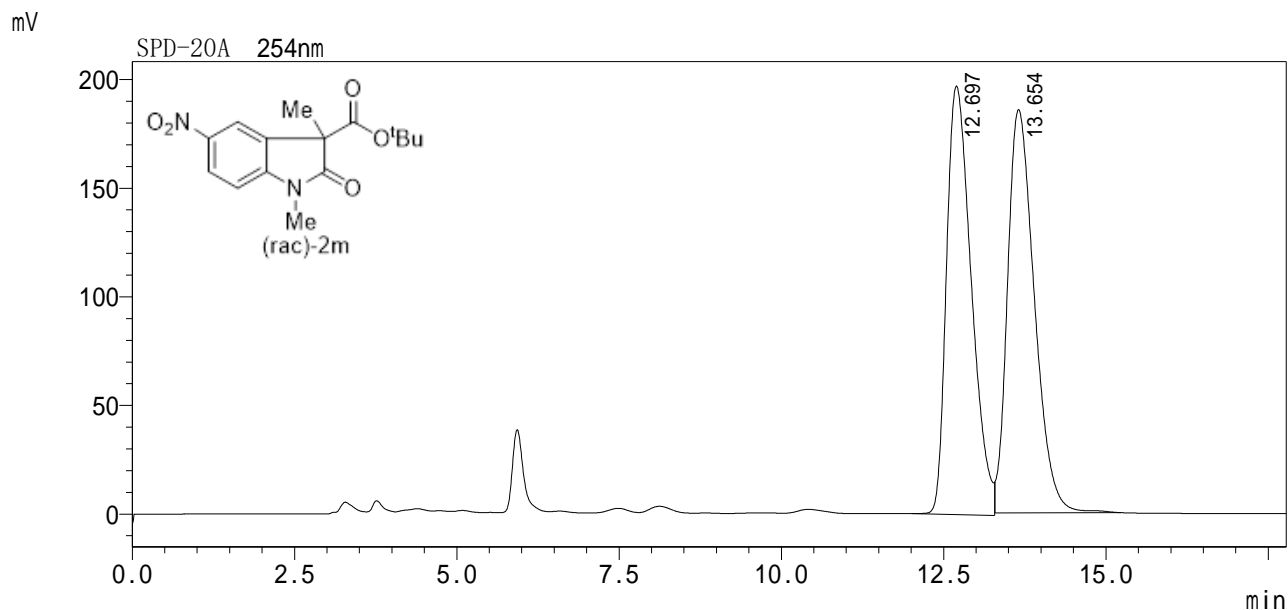

SPD-20A

| Entry | RT[min] | Area     | Height | Area%  |
|-------|---------|----------|--------|--------|
| 1     | 12.697  | 5251948  | 197296 | 49.550 |
| 2     | 13.654  | 5347254  | 185638 | 50.450 |
| Sum   |         | 10599202 | 382933 |        |

SHIMADZU LabSolutions HPLC Report

< Sample information >

Sample name : DZJC115-4-C-OD-5%  
 Data name : 2m--DZJC121-3-xiaojiCHIRAL-OD-5%.lcd  
 Acq. Method : OD-H-5%.lcm  
 Location : 1-1  
 Sample Type : unknown  
 : 1 uL  
 Ana. Date : 2020/8/8 21:14:40  
 Analyst : System Administrator  
 Pro. Date : 2020/8/8 21:34:34  
 Processor : System Administrator

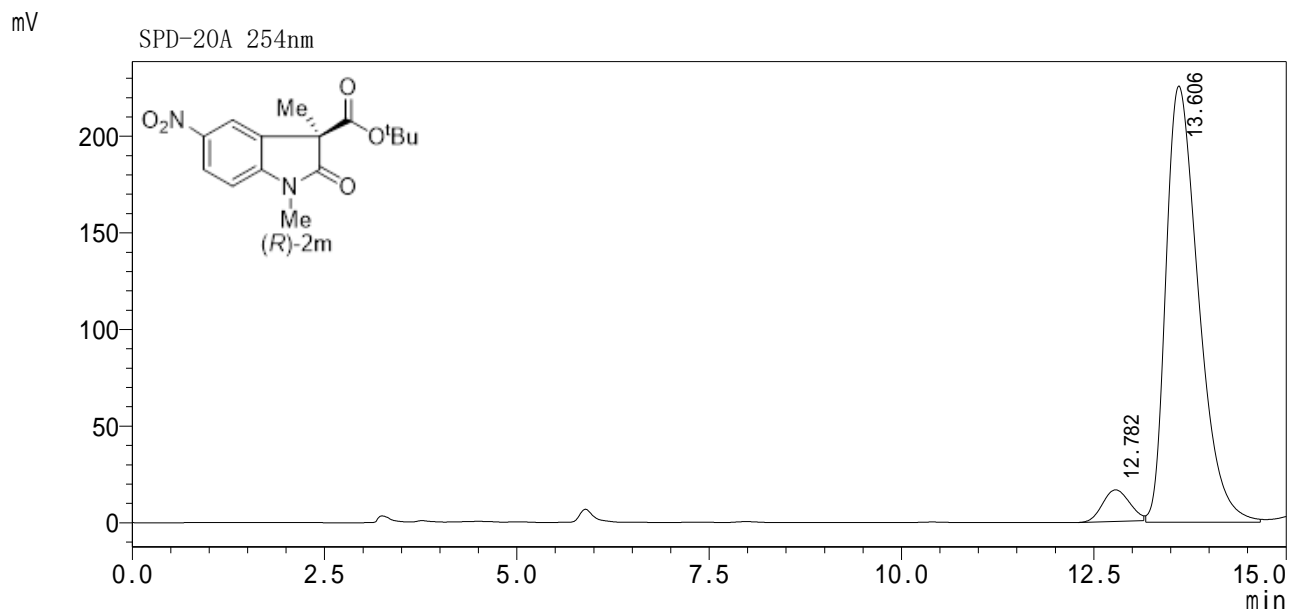

SPD-20A

| Entry | RT[min] | Area    | Height | Area%  |
|-------|---------|---------|--------|--------|
| 1     | 12.782  | 402462  | 16400  | 5.708  |
| 2     | 13.606  | 6647911 | 225667 | 94.292 |
| Sum   |         | 7050373 | 242067 |        |

SHIMADZU LabSolutions HPLC Report

< Sample information >

Sample name : DZJC112-1-RAC-OD-1%  
 Data name : 2n--DZJC114-2-dianduijiajiRAC-OD-1%.lcd  
 Acq. Method : OD-H-1%.lcm  
 Location : 1-1  
 : 1 uL  
 Ana. Date : 2020/8/2 10:36:08  
 Pro. Date : 2020/8/2 18:30:39  
 Sample Type : unknown  
 Analyst : System Administrator  
 Processor : System Administrator

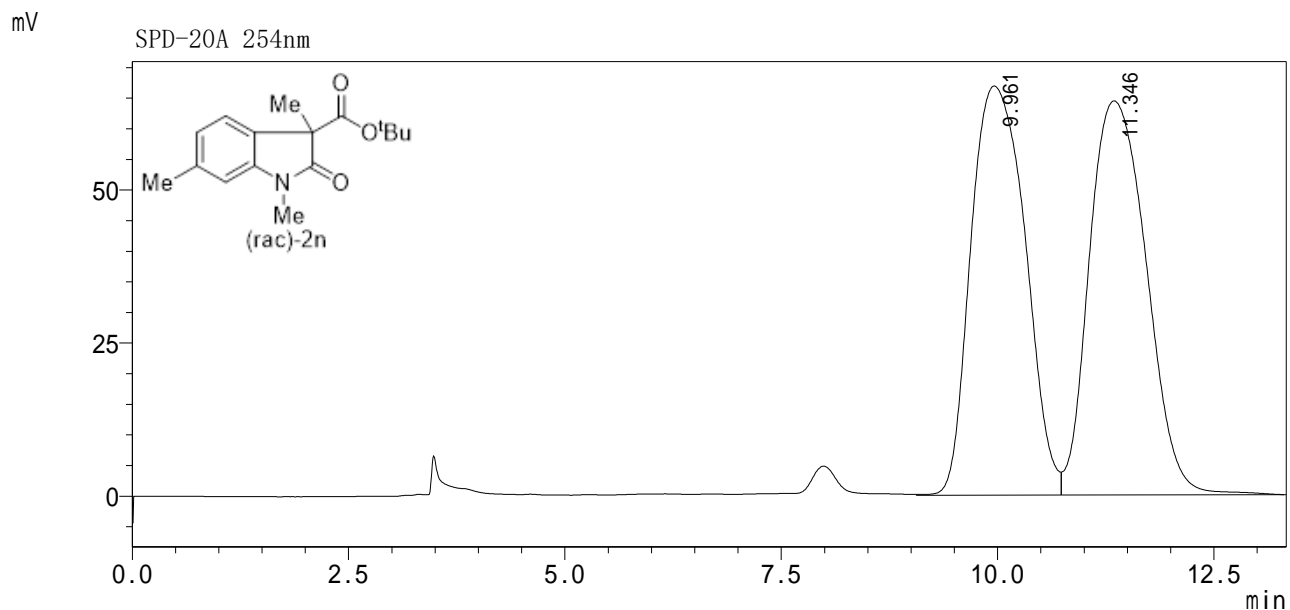

SPD-20A

| Entry | RT[min] | Area    | Height | Area%  |
|-------|---------|---------|--------|--------|
| 1     | 9.961   | 2927504 | 66817  | 49.746 |
| 2     | 11.346  | 2957351 | 64349  | 50.254 |
| Sum   |         | 5884855 | 131166 |        |

SHIMADZU LabSolutions HPLC Report

< Sample information >

Sample name : DZJC114-2.1-CHIRAL-OD-1%  
 Data name : 2n--DZJC114-2-dianduijiajiCHIRAL-OD-1%.lcd  
 Acq. Method : OD-H-1%.lcm  
 Location : 1-1  
 Sample Type : unknown  
 : 1 uL  
 Ana. Date : 2020/8/5 19:06:28  
 Analyst : System Administrator  
 Pro. Date : 2020/8/5 20:22:47  
 Processor : System Administrator

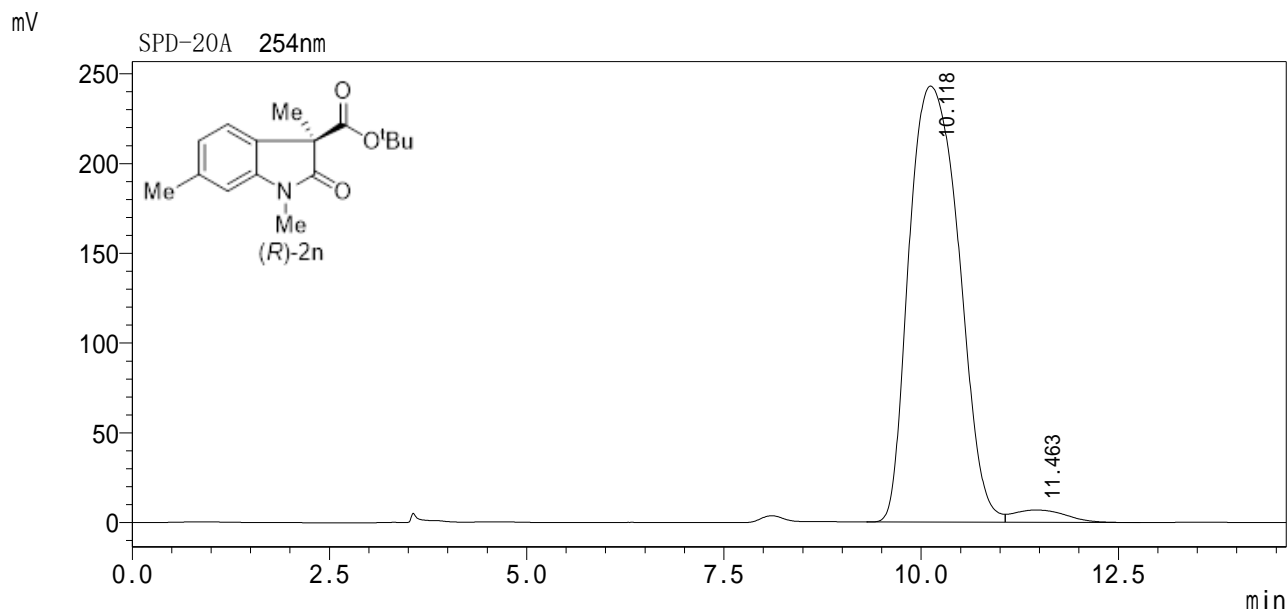

SPD-20A

| Entry | RT[min] | Area     | Height | Area%  |
|-------|---------|----------|--------|--------|
| 1     | 10.118  | 10707239 | 242924 | 97.120 |
| 2     | 11.463  | 317461   | 6868   | 2.880  |
| Sum   |         | 11024700 | 249792 |        |



SHIMADZU LabSolutions HPLC Report

< Sample information >

Sample name : DZJC111-rac-OD-1%  
 Data name : 2o--DZJC111-diandui lvRAC-OD-1%.lcd  
 Acq. Method : OD-H-1%.lcm  
 Location : 1-1  
 Sample Type : unknown  
 : 1 uL  
 Ana. Date : 2020/8/1 15:13:37  
 Analyst : System Administrator  
 Pro. Date : 2020/8/1 15:29:39  
 Processor : System Administrator

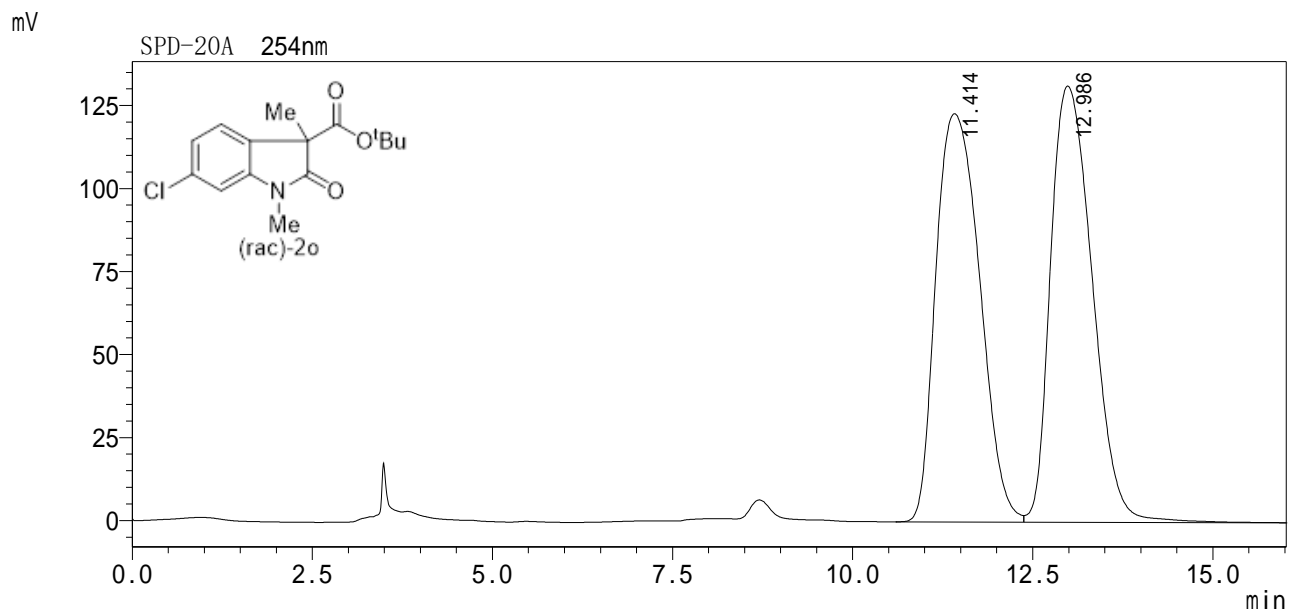

SPD-20A

| Entry | RT[min] | Area     | Height | Area%  |
|-------|---------|----------|--------|--------|
| 1     | 11.414  | 5214049  | 122972 | 49.621 |
| 2     | 12.986  | 5293681  | 131376 | 50.379 |
| Sum   |         | 10507730 | 254348 |        |

SHIMADZU LabSolutions HPLC Report

< Sample information >

Sample name : DZJC111-CHIRAL(S,S)-OD-1%  
 Data name : 2o--DZJC111-diandui lvCHIRAL(S,S)-OD-1%.lcd  
 Acq. Method : OD-H-1%.lcm  
 Location : 1-1  
 Sample Type : unknown  
 : 1 uL  
 Ana. Date : 2020/8/1 15:31:50  
 Analyst : System Administrator  
 Pro. Date : 2020/8/2 20:38:30  
 Processor : System Administrator

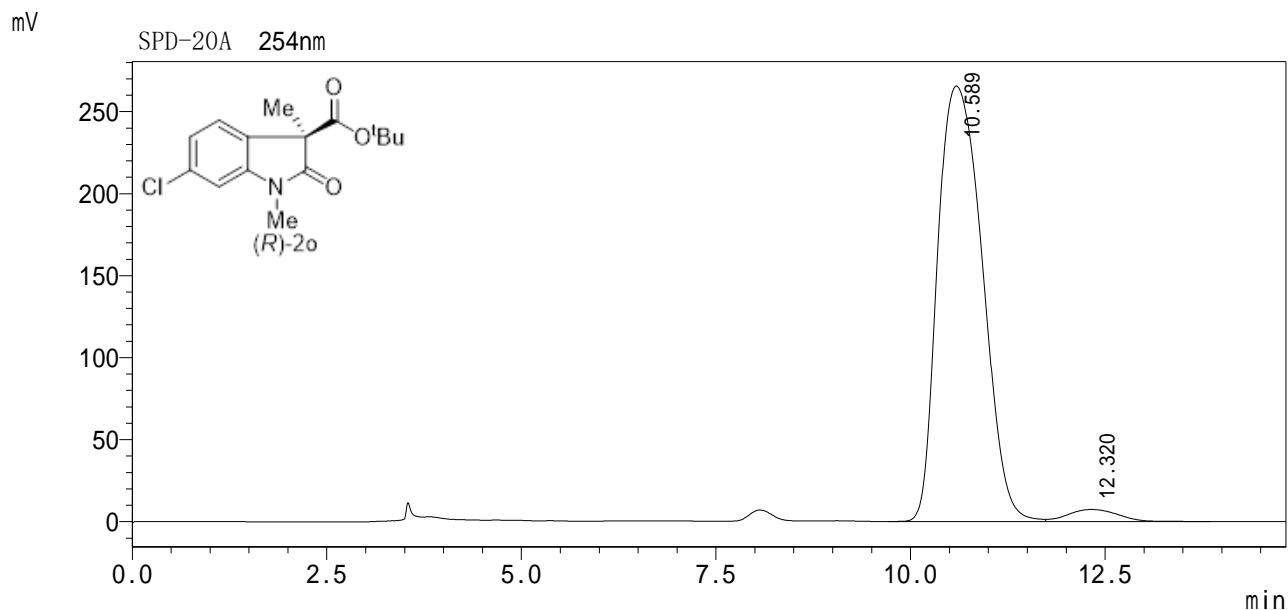

SPD-20A

| Entry | RT[min] | Area     | Height | Area%  |
|-------|---------|----------|--------|--------|
| 1     | 10.589  | 10596970 | 265534 | 96.936 |
| 2     | 12.320  | 334903   | 7374   | 3.064  |
| Sum   |         | 10931873 | 272909 |        |

SHIMADZU LabSolutions HPLC Report

< Sample information >

Sample name : DZJC115-3-RAC-OD-1%  
 Data name : 2p--DZJC121-2-dianduifuRAC-OD-1%.lcd  
 Acq. Method : OD-H-1%.lcm  
 Location : 1-1  
 : 1 uL  
 Ana. Date : 2020/8/7 18:43:39  
 Pro. Date : 2020/8/7 23:15:41  
 Sample Type : unknown  
 Analyst : System Administrator  
 Processor : System Administrator

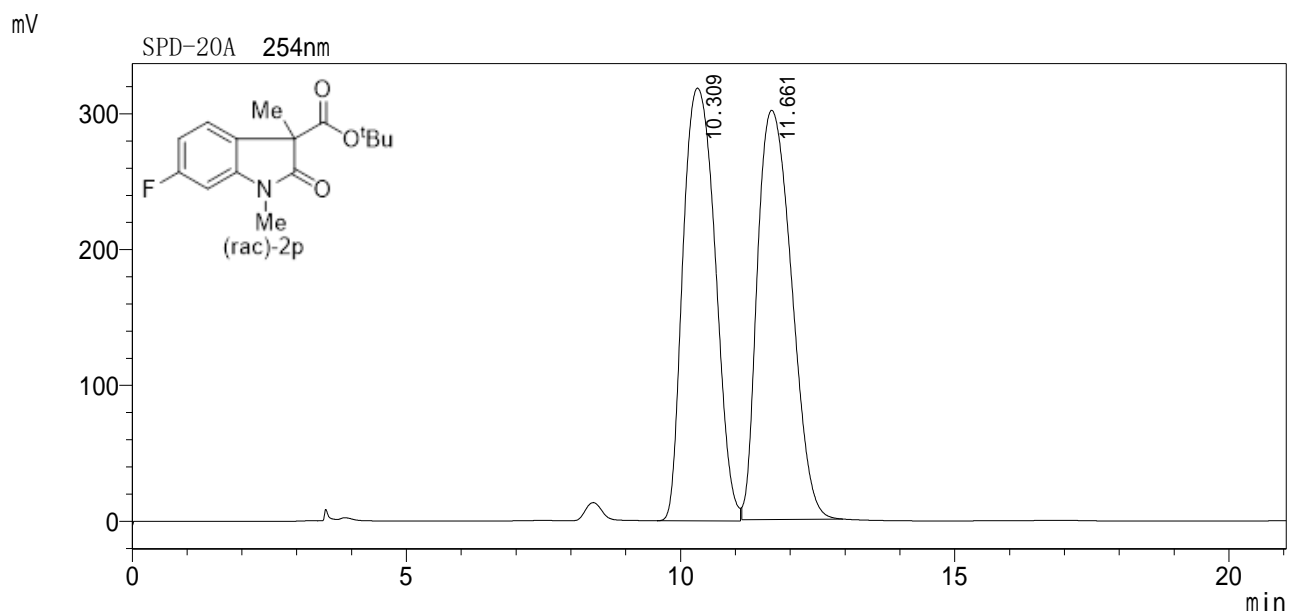

SPD-20A

| Entry | RT[min] | Area     | Height | Area%  |
|-------|---------|----------|--------|--------|
| 1     | 10.309  | 13050188 | 318794 | 50.004 |
| 2     | 11.661  | 13047914 | 301312 | 49.996 |
| Sum   |         | 26098102 | 620107 |        |

SHIMADZU LabSolutions HPLC Report

< Sample information >

Sample name : DZJC121-2-C-OD-1%  
 Data name : 2p--DZJC121-2-dianduifuCHIRAL-OD-1%.lcd  
 Acq. Method : OD-H-1%.lcm  
 Location : 1-1  
 Sample Type : unknown  
 : 1 uL  
 Ana. Date : 2020/8/7 19:10:57  
 Analyst : System Administrator  
 Pro. Date : 2020/8/7 23:15:39  
 Processor : System Administrator

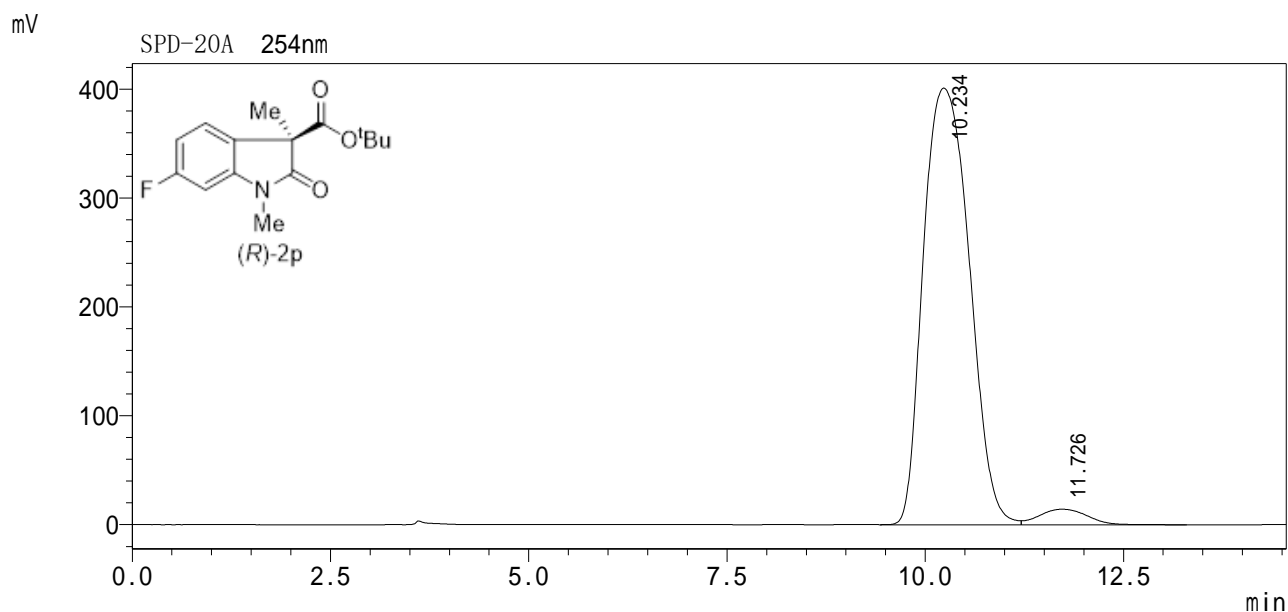

SPD-20A

| Entry | RT [min] | Area     | Height | Area%  |
|-------|----------|----------|--------|--------|
| 1     | 10.234   | 16208320 | 401003 | 96.433 |
| 2     | 11.726   | 599556   | 14228  | 3.567  |
| Sum   |          | 16807876 | 415231 |        |

SHIMADZU LabSolutions HPLC Report

< Sample information >

Sample name : DZJC140-r-AS-1%  
 Data name : 2q--DZJC140-diandujiiazhiRAC-AS-1%.lcd  
 Acq. Method : AS-H-1%.lcm  
 Location : 1-1  
 : 1 uL  
 Ana. Date : 2020/8/26 14:24:54  
 Pro. Date : 2020/8/26 15:30:09  
 Sample Type : unknown  
 Analyst : System Administrator  
 Processor : System Administrator

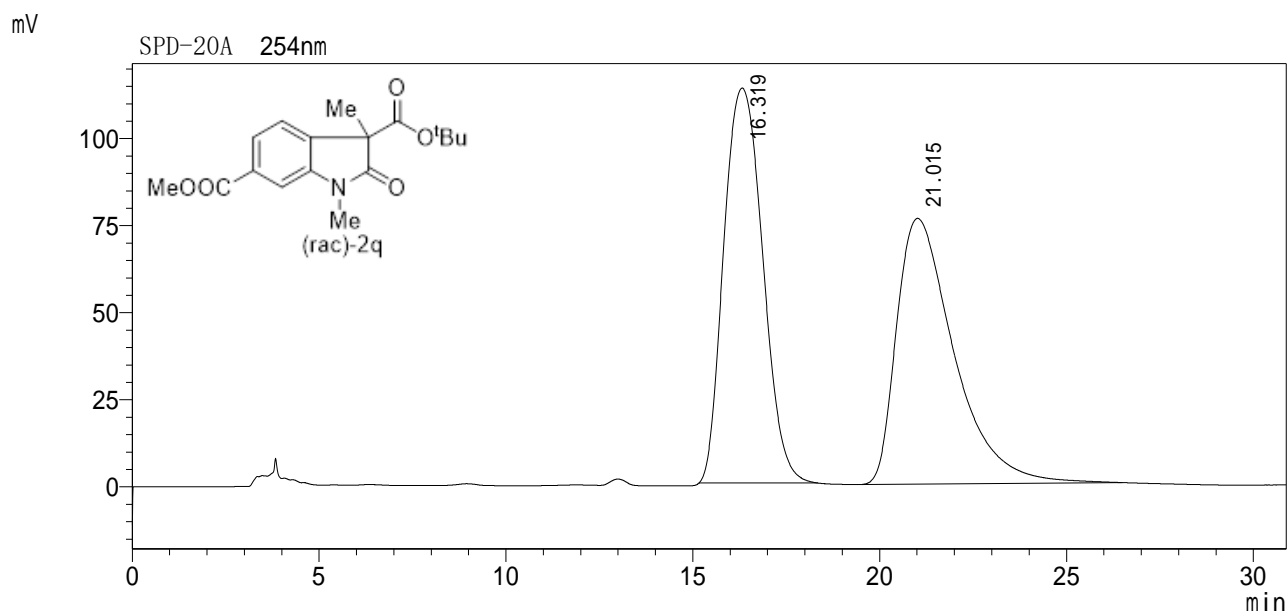

SPD-20A

| Entry | RT[min] | Area     | Height | Area%  |  |  |  |
|-------|---------|----------|--------|--------|--|--|--|
| 1     | 16.319  | 8230437  | 113412 | 50.285 |  |  |  |
| 2     | 21.015  | 8137070  | 76295  | 49.715 |  |  |  |
| Sum   |         | 16367506 | 189707 |        |  |  |  |

SHIMADZU LabSolutions HPLC Report

< Sample information >

Sample name : DZJC140-c-AS-1%  
 Data name : 2q--DZJC140-dianduijiazhiCHIRAL-AS-1%.lcd  
 Acq. Method : AS-H-1%.lcm  
 Location : 1-1  
 : 1 uL  
 Ana. Date : 2020/8/26 14:58:37  
 Pro. Date : 2020/8/26 15:30:03  
 Sample Type : unknown  
 Analyst : System Administrator  
 Processor : System Administrator

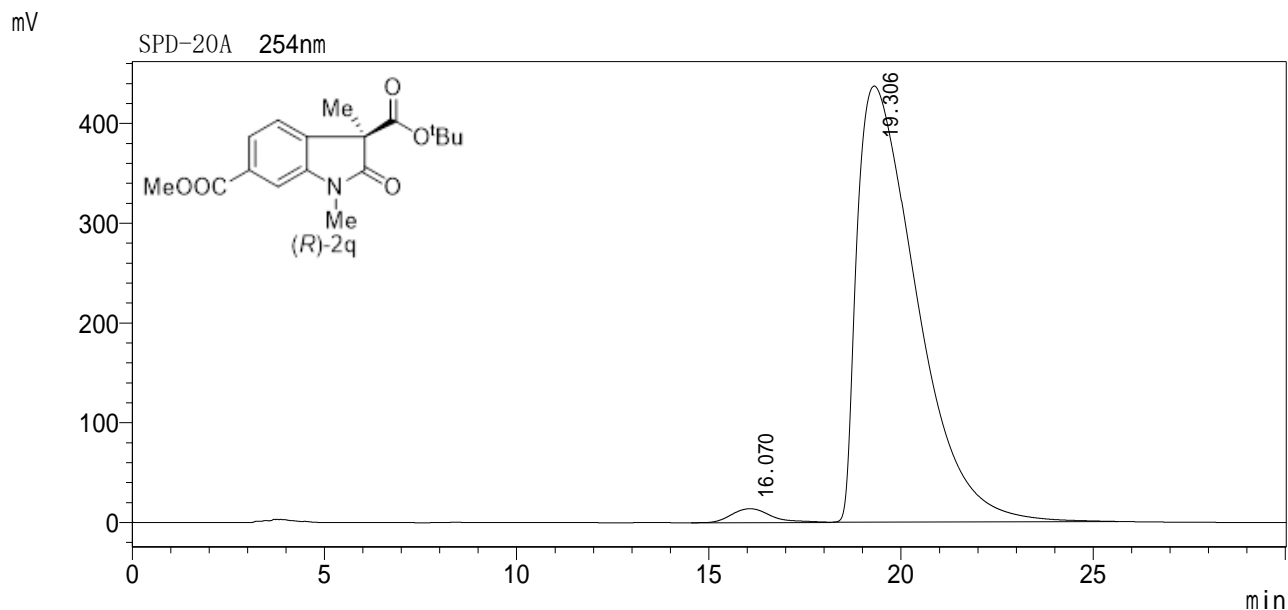

SPD-20A

| Entry | RT[min] | Area     | Height | Area%  |  |  |  |
|-------|---------|----------|--------|--------|--|--|--|
| 1     | 16.070  | 1035598  | 14029  | 2.162  |  |  |  |
| 2     | 19.306  | 46871083 | 437047 | 97.838 |  |  |  |
| Sum   |         | 47906681 | 451076 |        |  |  |  |

SHIMADZU LabSolutions HPLC Report

< Sample information >

Sample name : DZJC121-1-R-IC-1%  
 Data name : 2r--DZJC121-1-dianlinjiajiRAC-IC-1%.lcd  
 Acq. Method : IC-H-1%.lcm  
 Location : 1-1  
 : 1 uL  
 Ana. Date : 2020/8/8 14:33:40  
 Pro. Date : 2020/8/8 18:29:59  
 Sample Type : unknown  
 Analyst : System Administrator  
 Processor : System Administrator

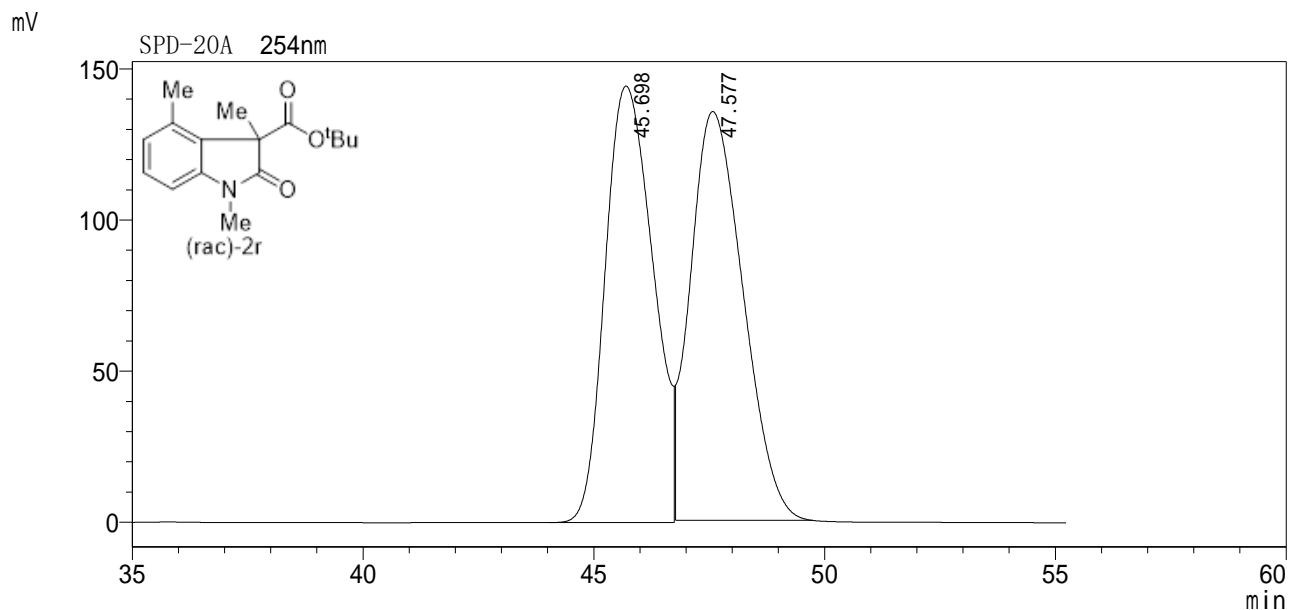

SPD-20A

| Entry | RT[min] | Area     | Height | Area%  |  |  |  |
|-------|---------|----------|--------|--------|--|--|--|
| 1     | 45.698  | 10437998 | 144470 | 49.354 |  |  |  |
| 2     | 47.577  | 10711377 | 135258 | 50.646 |  |  |  |
| Sum   |         | 21149375 | 279728 |        |  |  |  |

SHIMADZU LabSolutions HPLC Report

< Sample information >

Sample name : DZJC121-1-C-IC-1%  
 Data name : 2r--DZJC121-1-dianlinjiajiCHIRAL-IC-1%.lcd  
 Acq. Method : IC-H-1%.lcm  
 Location : 1-1  
 : 1 uL  
 Ana. Date : 2020/8/8 11:21:25  
 Pro. Date : 2020/8/8 18:30:17  
 Sample Type : unknown  
 Analyst : System Administrator  
 Processor : System Administrator

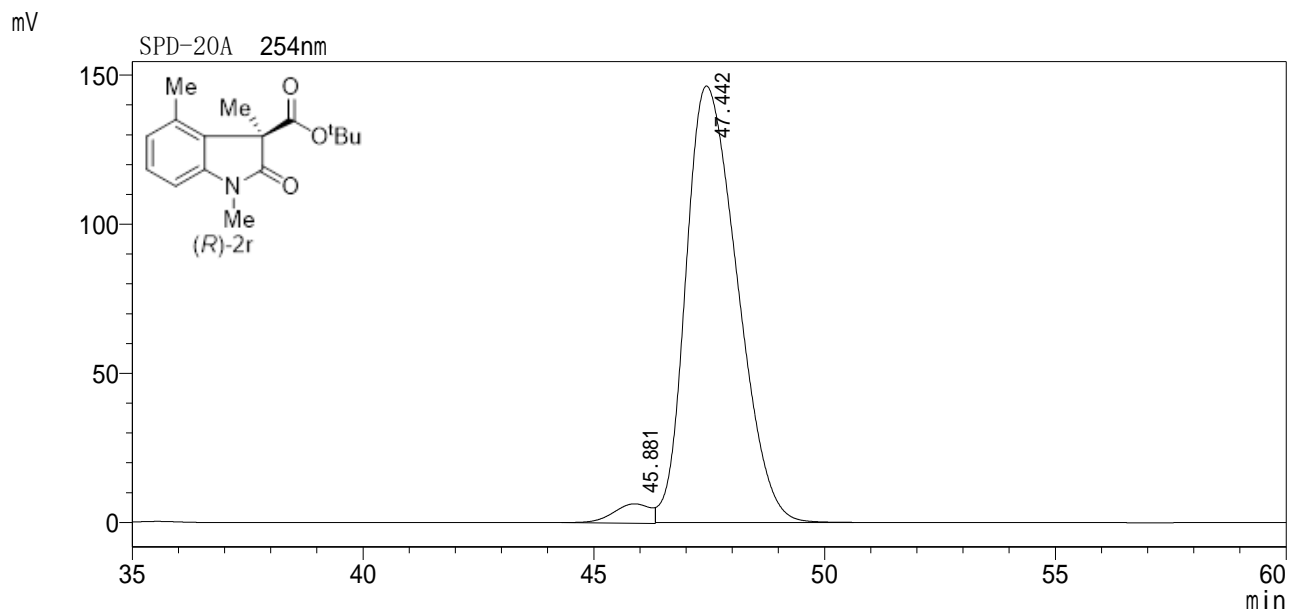

SPD-20A

| Entry | RT[min] | Area     | Height | Area%  |  |  |
|-------|---------|----------|--------|--------|--|--|
| 1     | 45.881  | 362833   | 6510   | 3.109  |  |  |
| 2     | 47.442  | 11306058 | 146407 | 96.891 |  |  |
| Sum   |         | 11668891 | 152917 |        |  |  |



SHIMADZU LabSolutions HPLC Report

< Sample information >

Sample name : dzjc147-r-OJ-1%  
 Data name : 2s--dzjc147-dianIindianRAC-OJ-1%.lcd  
 Acq. Method : OJ-H-1%.lcm  
 Location : 1-1  
 Sample Type : unknown  
 : 1 uL  
 Ana. Date : 2020/9/3 15:03:55  
 Analyst : System Administrator  
 Pro. Date : 2020/9/3 16:40:55  
 Processor : System Administrator

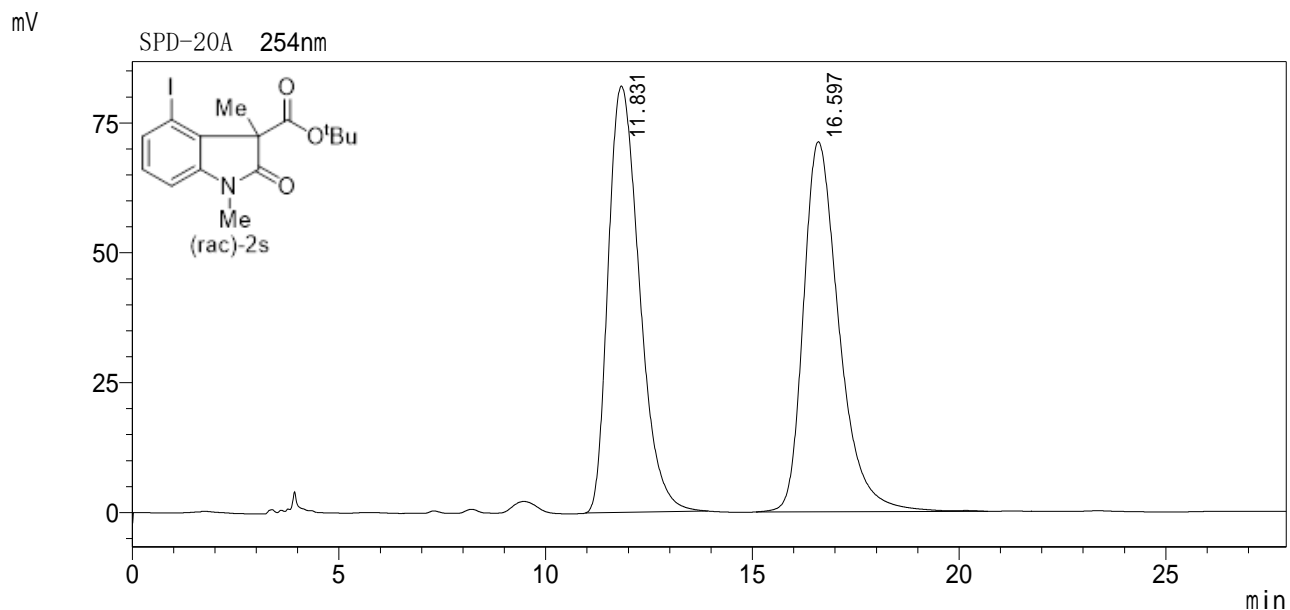

SPD-20A

| Entry | RT[min] | Area    | Height | Area%  |
|-------|---------|---------|--------|--------|
| 1     | 11.831  | 4311218 | 82073  | 50.253 |
| 2     | 16.597  | 4267782 | 71242  | 49.747 |
| Sum   |         | 8578999 | 153316 |        |

SHIMADZU LabSolutions HPLC Report

< Sample information >

Sample name : dzjc147-C-0J-1%  
 Data name : 2s--dzjc147-dianlindianCHIRAL-0J-1%.lcd  
 Acq. Method : 0J-H-1%.lcm  
 Location : 1-1  
 : 1 uL  
 Ana. Date : 2020/9/3 16:15:49  
 Pro. Date : 2020/9/3 16:40:49  
 Sample Type : unknown  
 Analyst : System Administrator  
 Processor : System Administrator

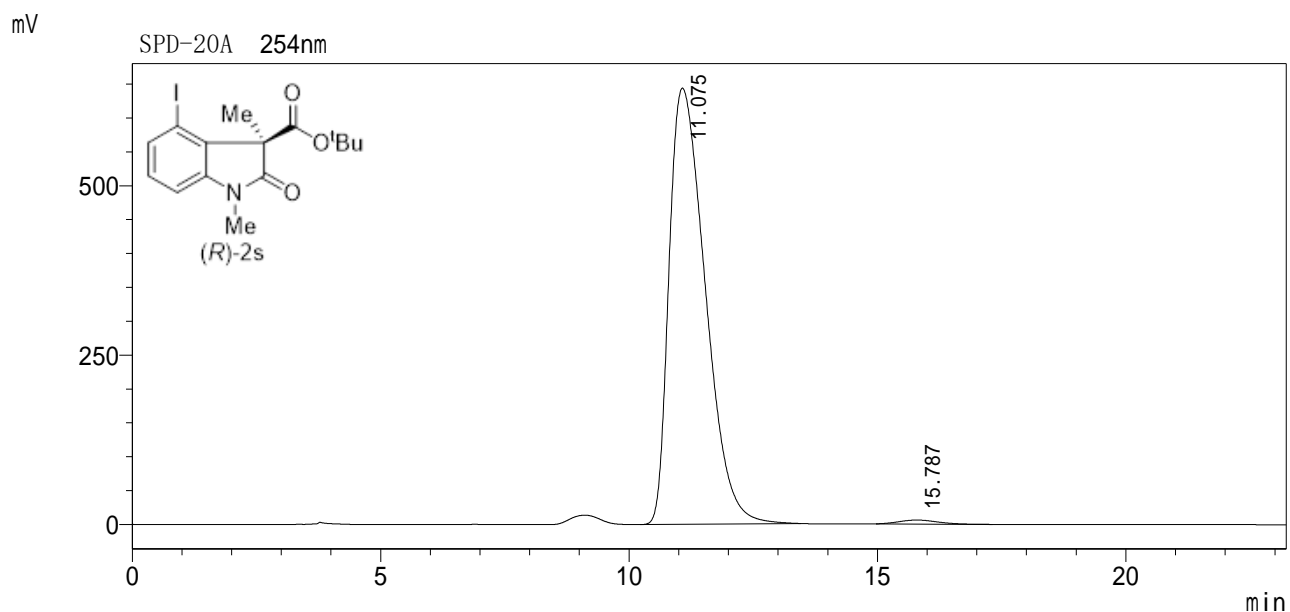

SPD-20A

| Entry | RT[min] | Area     | Height | Area%  |
|-------|---------|----------|--------|--------|
| 1     | 11.075  | 32570814 | 643846 | 99.025 |
| 2     | 15.787  | 320781   | 5921   | 0.975  |
| Sum   |         | 32891595 | 649767 |        |

SHIMADZU LabSolutions HPLC Report

< Sample information >

Sample name : DZJC123-1-RAC-OJ-1%  
 Data name : 2t--DZJC124-1-anlinjiajiRAC-OJ-1%.lcd  
 Acq. Method : OJ-H-1%.lcm  
 Location : 1-1  
 Sample Type : unknown  
 : 1 uL  
 Ana. Date : 2020/8/11 21:17:56  
 Analyst : System Administrator  
 Pro. Date : 2020/8/11 22:46:09  
 Processor : System Administrator

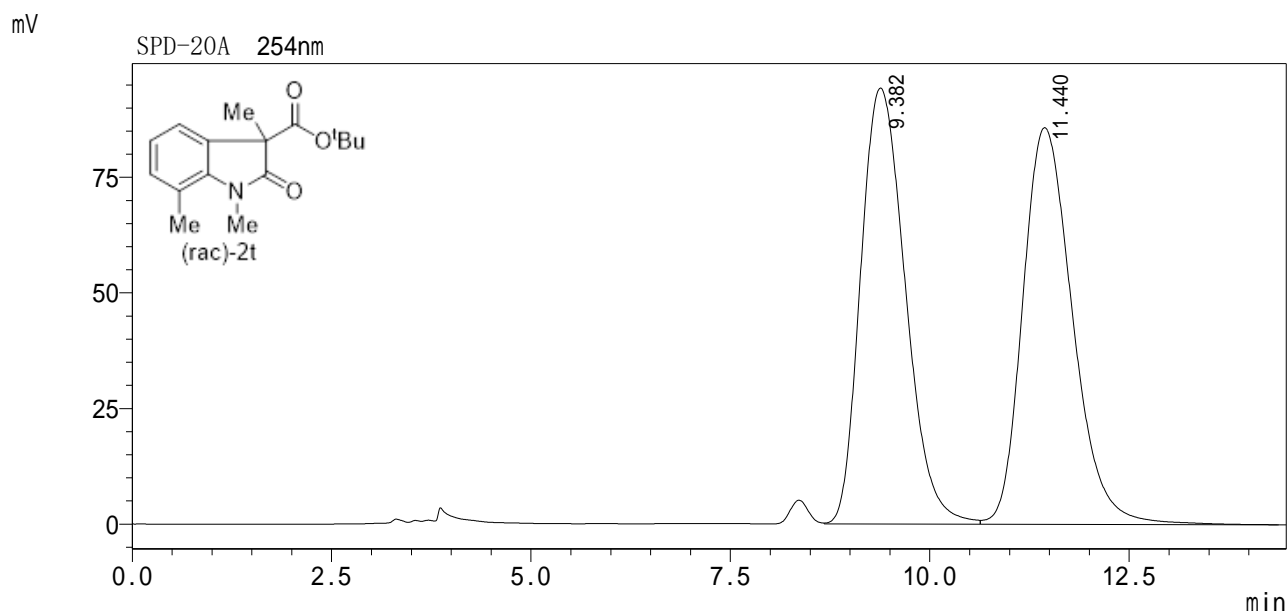

SPD-20A

| Entry | RT[min] | Area    | Height | Area%  |
|-------|---------|---------|--------|--------|
| 1     | 9.382   | 3678416 | 94329  | 49.659 |
| 2     | 11.440  | 3728941 | 85816  | 50.341 |
| Sum   |         | 7407356 | 180144 |        |

SHIMADZU LabSolutions HPLC Report

< Sample information >

Sample name : DZJC124-1-C-OJ-1%  
 Data name : 2t--DZJC124-1-anlinjiajiCHIRAL-OJ-1%.lcd  
 Acq. Method : OJ-H-1%.lcm  
 Location : 1-1  
 : 1 uL  
 Ana. Date : 2020/8/11 21:33:52  
 Pro. Date : 2020/8/11 22:46:06  
 Sample Type : unknown  
 Analyst : System Administrator  
 Processor : System Administrator

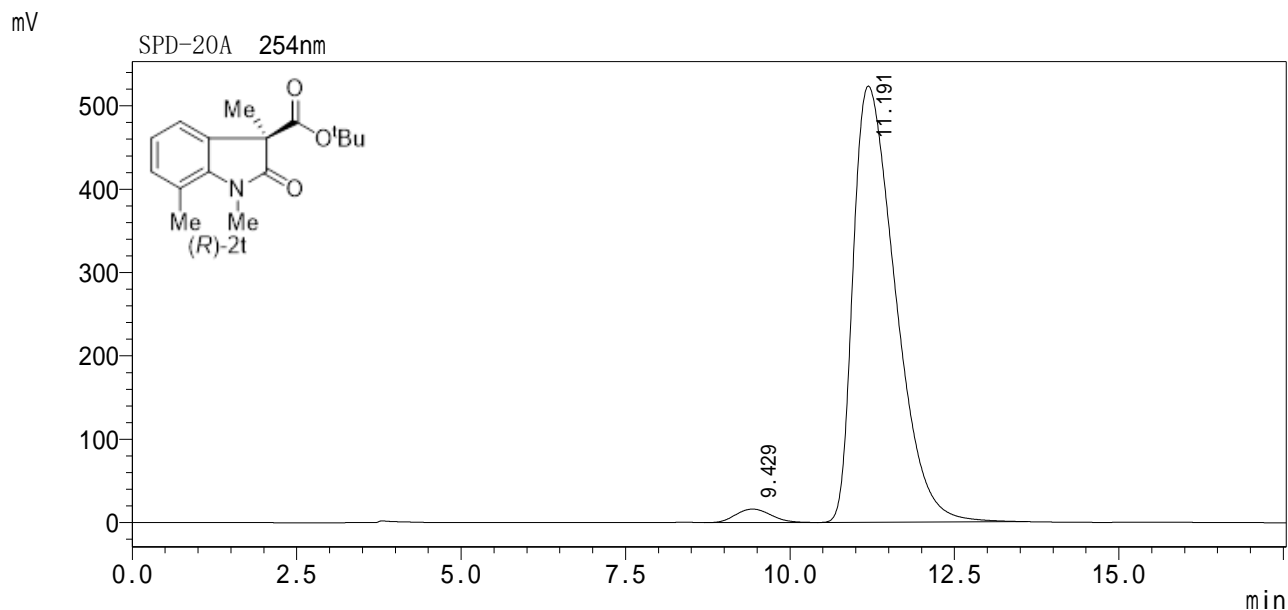

SPD-20A

| Entry | RT [min] | Area     | Height | Area%  |
|-------|----------|----------|--------|--------|
| 1     | 9.429    | 605564   | 16178  | 2.534  |
| 2     | 11.191   | 23288460 | 523414 | 97.466 |
| Sum   |          | 23894024 | 539591 |        |

SHIMADZU LabSolutions HPLC Report

< Sample information >

Sample name : DZJC108-2-RAC-OD-1%  
 Data name : 2u--DZJC113-2-bingjiRAC-OD-1%.lcd  
 Acq. Method : OD-H-1%.lcm  
 Location : 1-1  
 Sample Type : unknown  
 : 1 uL  
 Ana. Date : 2020/7/31 14:42:51  
 Analyst : System Administrator  
 Pro. Date : 2020/7/31 14:58:53  
 Processor : System Administrator

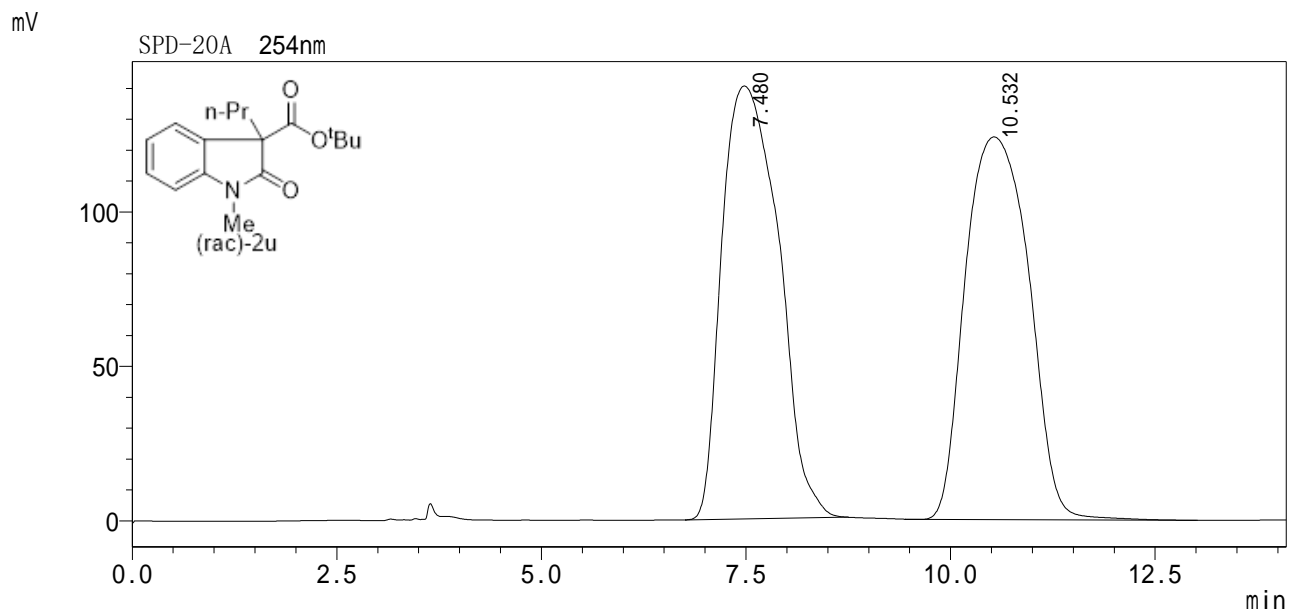

SPD-20A

| Entry | RT[min] | Area     | Height | Area%  |
|-------|---------|----------|--------|--------|
| 1     | 7.480   | 6760991  | 140146 | 50.190 |
| 2     | 10.532  | 6709935  | 123870 | 49.810 |
| Sum   |         | 13470926 | 264016 |        |

SHIMADZU LabSolutions HPLC Report

< Sample information >

Sample name : DZJC113-2-C-OD-1%  
 Data name : 2u--DZJC113-2-bingjiCHIRAL-OD-1%.lcd  
 Acq. Method : OD-H-1%.lcm  
 Location : 1-1  
 : 1 uL  
 Ana. Date : 2020/8/2 20:15:02  
 Pro. Date : 2020/8/2 20:32:34  
 Sample Type : unknown  
 Analyst : System Administrator  
 Processor : System Administrator

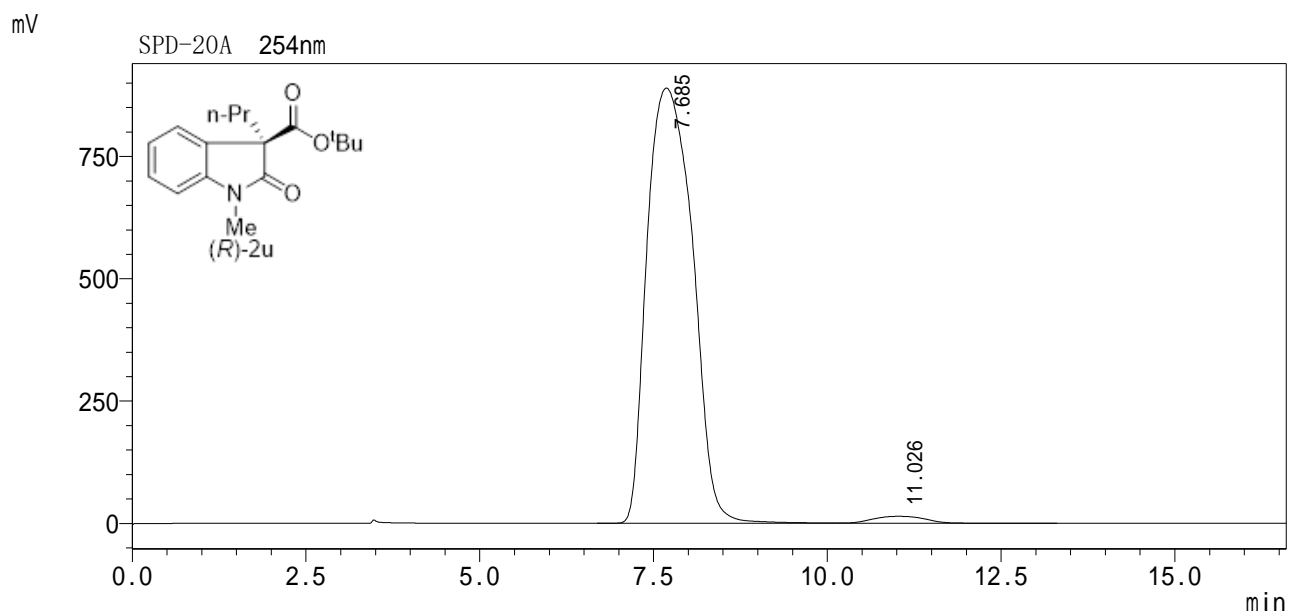

SPD-20A

| Entry | RT[min] | Area     | Height | Area%  |  |  |  |
|-------|---------|----------|--------|--------|--|--|--|
| 1     | 7.685   | 40609931 | 889722 | 98.145 |  |  |  |
| 2     | 11.026  | 767350   | 14328  | 1.855  |  |  |  |
| Sum   |         | 41377280 | 904049 |        |  |  |  |

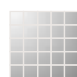

SHIMADZU

LabSolutions

## HPLC Report

## &lt; Sample information &gt;

Sample name : DZJC123-3-R-OD-1%  
Data name : 2v--DZJC124-3-changwanlianRAC-OD-1%.lcd  
Acq. Method : OD-H-1%.lcm  
Location : 1-1  
Sample Type : unknown  
Ana. Date : 2020/8/11 22:04:35  
Analyst : System Administrator  
Pro. Date : 2020/8/11 22:46:04  
Processor : System Administrator

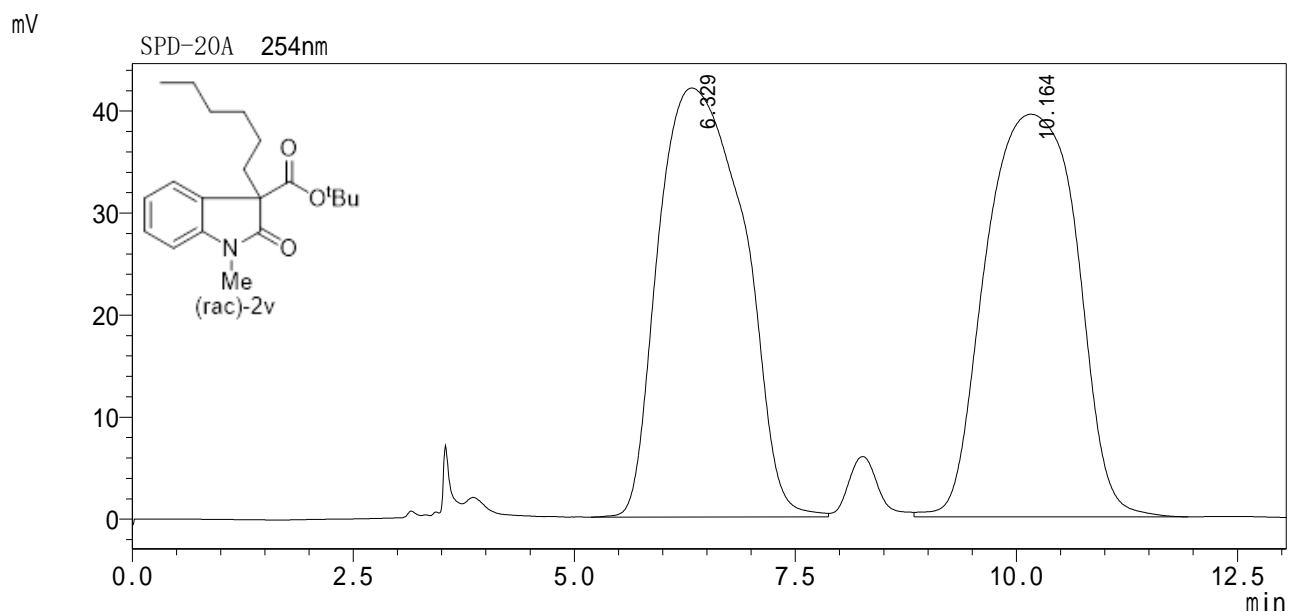

SPD-20A

| Entry | RT[min] | Area    | Height | Area%  |  |  |  |
|-------|---------|---------|--------|--------|--|--|--|
| 1     | 6.329   | 2824435 | 42043  | 49.833 |  |  |  |
| 2     | 10.164  | 2843383 | 39460  | 50.167 |  |  |  |
| Sum   |         | 5667818 | 81503  |        |  |  |  |

SHIMADZU LabSolutions HPLC Report

< Sample information >

Sample name : DZJC124-3-C-OD-1%  
 Data name : 2v--DZJC124-3-changwanlianCHIRAL-OD-1%.lcd  
 Acq. Method : OD-H-1%.lcm  
 Location : 1-1  
 : 1 uL  
 Ana. Date : 2020/8/11 22:18:45  
 Pro. Date : 2020/8/11 22:46:01  
 Sample Type : unknown  
 Analyst : System Administrator  
 Processor : System Administrator

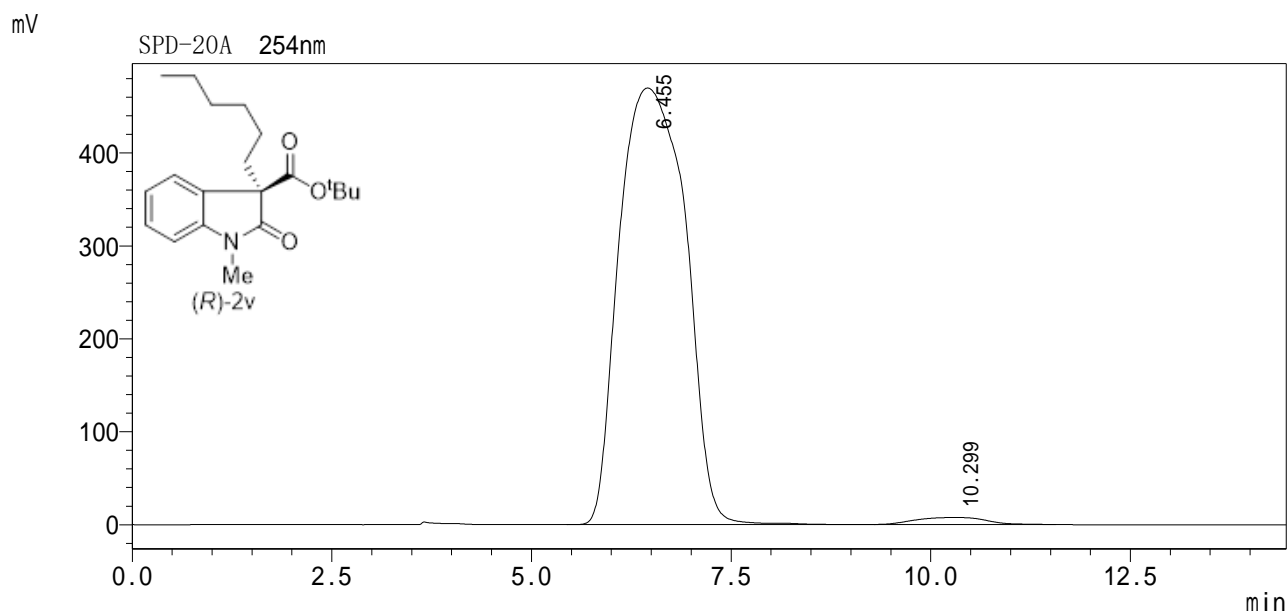

SPD-20A

| Entry | RT [min] | Area     | Height | Area%  |
|-------|----------|----------|--------|--------|
| 1     | 6.455    | 27187059 | 469683 | 98.329 |
| 2     | 10.299   | 462019   | 7485   | 1.671  |
| Sum   |          | 27649078 | 477168 |        |



SHIMADZU LabSolutions HPLC Report

< Sample information >

Sample name : DZJC113-1-RAC-OJ-3%  
 Data name : 2w-DZJC113-1-benjiRAC-OJ-3%.lcd  
 Acq. Method : OJ-H-3%-50min.lcm  
 Location : 1-1  
 Sample Type : unknown  
 : 1 uL  
 Ana. Date : 2020/8/2 22:18:41  
 Analyst : System Administrator  
 Pro. Date : 2020/8/2 22:45:25  
 Processor : System Administrator

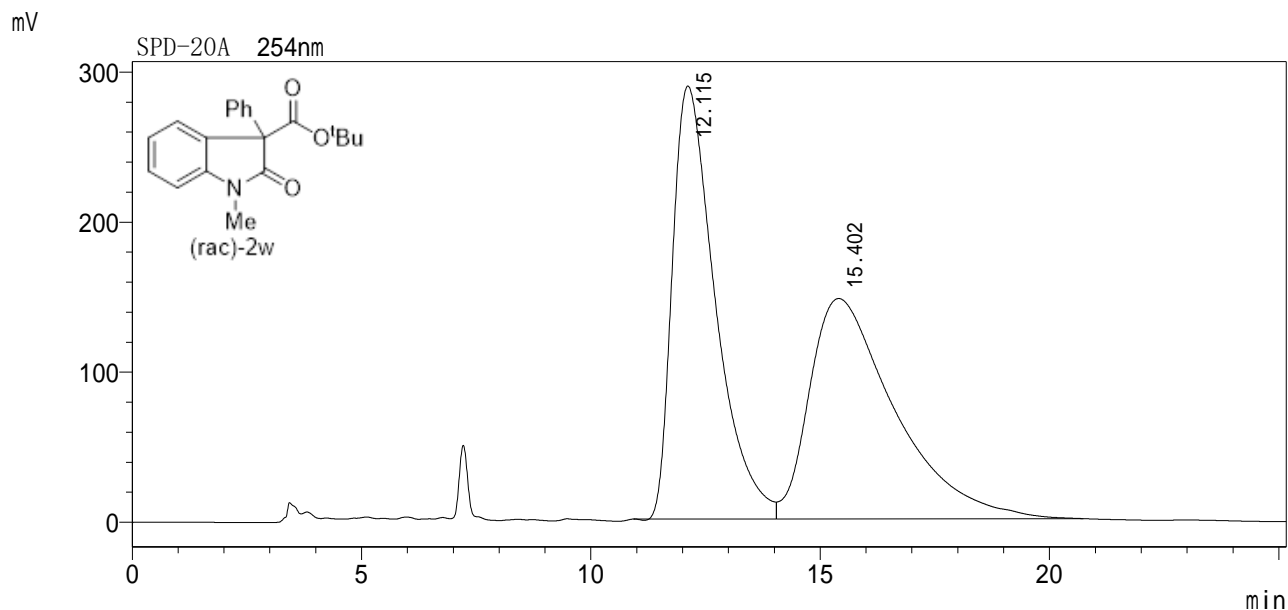

SPD-20A

| Entry | RT[min] | Area     | Height | Area%  |
|-------|---------|----------|--------|--------|
| 1     | 12.115  | 18789490 | 288519 | 49.676 |
| 2     | 15.402  | 19034922 | 146816 | 50.324 |
| Sum   |         | 37824412 | 435335 |        |

SHIMADZU LabSolutions HPLC Report

< Sample information >

Sample name : DZJC113-1-CHIRAL-OJ-3%  
 Data name : 2w--DZJC113-1-benjiCHIRAL-OJ-3%.lcd  
 Acq. Method : OJ-H-3%-50min.lcm  
 Location : 1-1  
 : 1 uL  
 Ana. Date : 2020/8/2 21:52:49  
 Pro. Date : 2020/8/2 22:45:52  
 Sample Type : unknown  
 Analyst : System Administrator  
 Processor : System Administrator

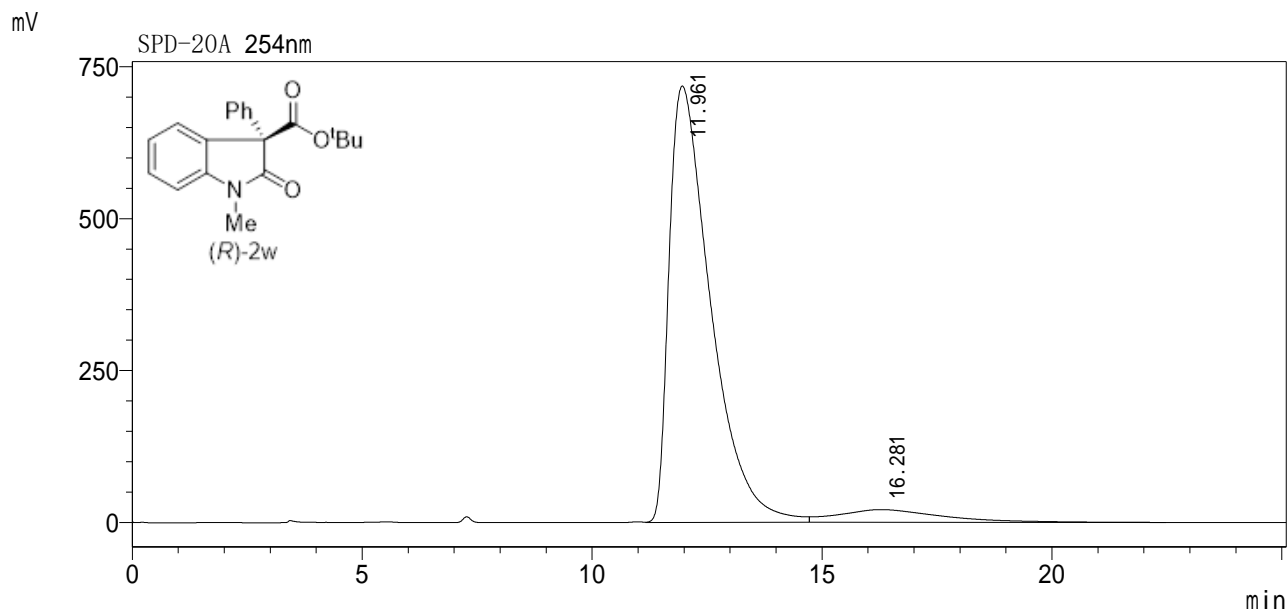

SPD-20A

| Entry | RT[min] | Area     | Height | Area%  |
|-------|---------|----------|--------|--------|
| 1     | 11.961  | 45159860 | 718465 | 93.322 |
| 2     | 16.281  | 3231727  | 20674  | 6.678  |
| Sum   |         | 48391587 | 739139 |        |

SHIMADZU LabSolutions HPLC Report

< Sample information >

Sample name : DZJC123-2-RAC-OD-1%  
 Data name : 2x--DZJC124-2-xibingjiRAC-OD-1%.lcd  
 Acq. Method : OD-H-1%.lcm  
 Location : 1-1  
 : 1 uL  
 Ana. Date : 2020/8/14 10:58:53  
 Pro. Date : 2020/8/15 9:37:51  
 Sample Type : unknown  
 Analyst : System Administrator  
 Processor : System Administrator

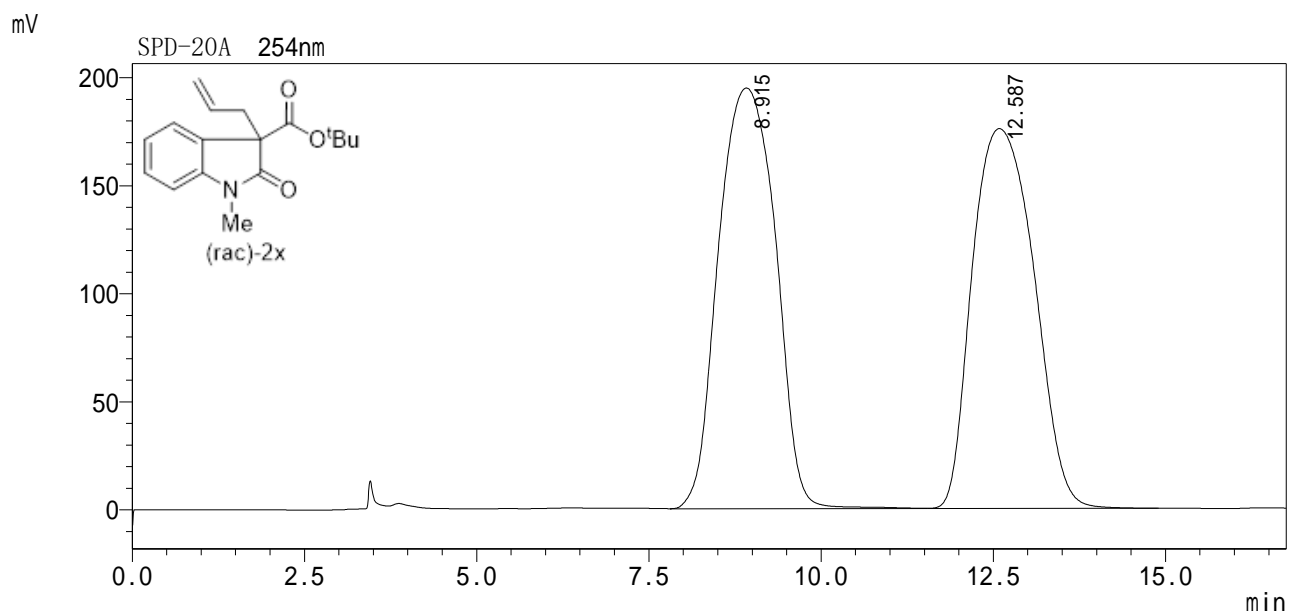

SPD-20A

| Entry | RT[min] | Area     | Height | Area%  |
|-------|---------|----------|--------|--------|
| 1     | 8.915   | 11246211 | 194663 | 50.537 |
| 2     | 12.587  | 11007002 | 175793 | 49.463 |
| Sum   |         | 22253213 | 370456 |        |

SHIMADZU LabSolutions HPLC Report

< Sample information >

Sample name : DZJC124-2-C-OD-1%  
 Data name : 2x--DZJC124-2-xibingjiCHIRAL-OD-1%.lcd  
 Acq. Method : OD-H-1%.lcm  
 Location : 1-1  
 Sample Type : unknown  
 : 1 uL  
 Ana. Date : 2020/8/14 11:16:58  
 Analyst : System Administrator  
 Pro. Date : 2020/8/15 9:36:58  
 Processor : System Administrator

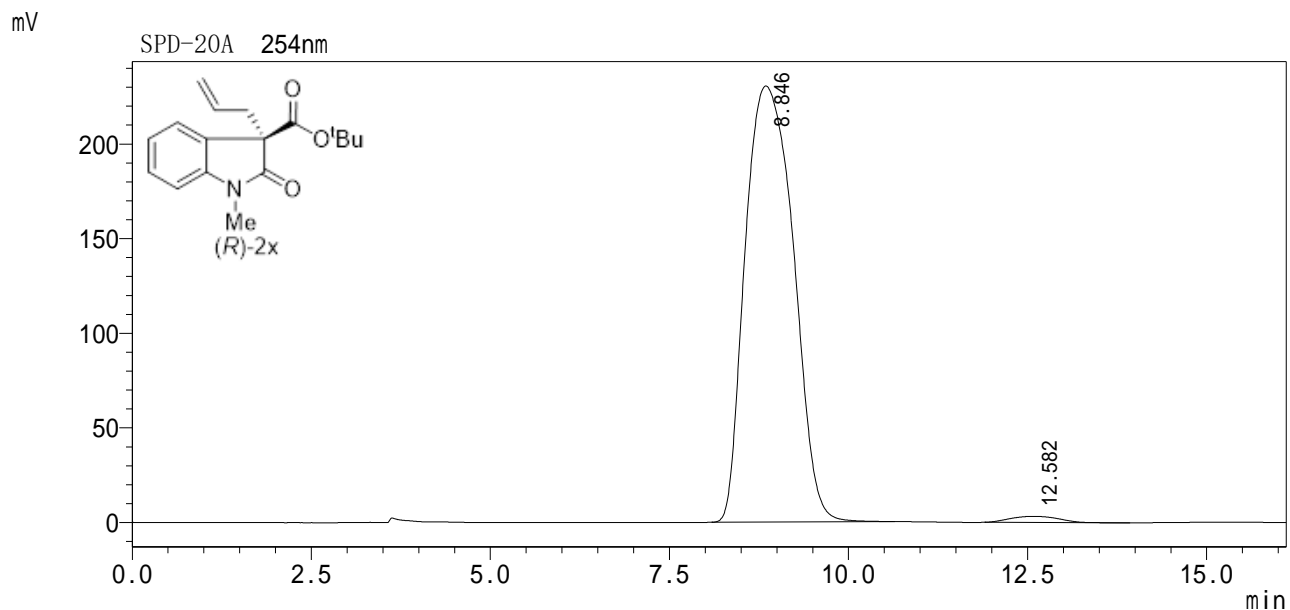

SPD-20A

| Entry | RT [min] | Area     | Height | Area%  |
|-------|----------|----------|--------|--------|
| 1     | 8.846    | 10801281 | 230385 | 98.639 |
| 2     | 12.582   | 149017   | 3203   | 1.361  |
| Sum   |          | 10950298 | 233588 |        |

SHIMADZU LabSolutions HPLC Report

< Sample information >

Sample name : DZJC139-r-AS-1%  
 Data name : 2y--DZJC139-bianjiRAC-AS-1%.lcd  
 Acq. Method : AS-H-1%.lcm  
 Location : 1-1  
 : 1 uL  
 Ana. Date : 2020/8/24 11:06:42  
 Pro. Date : 2020/8/24 11:27:49  
 Sample Type : unknown  
 Analyst : System Administrator  
 Processor : System Administrator

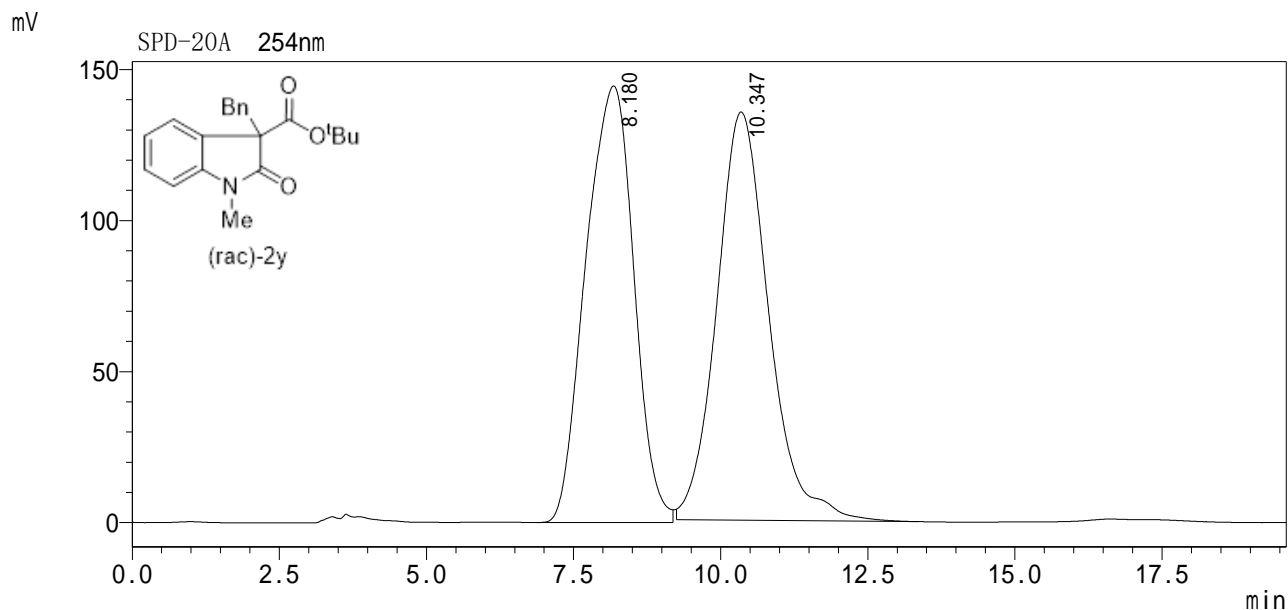

SPD-20A

| Entry | RT[min] | Area     | Height | Area%  |
|-------|---------|----------|--------|--------|
| 1     | 8.180   | 8204306  | 144486 | 49.700 |
| 2     | 10.347  | 8303402  | 135209 | 50.300 |
| Sum   |         | 16507708 | 279695 |        |

SHIMADZU LabSolutions HPLC Report

< Sample information >

Sample name : DZJC139-c-AS-1%  
 Data name : 2y--DZJC139-bianjiCHIRAL-AS-1%.lcd  
 Acq. Method : AS-H-1%.lcm  
 Location : 1-1  
 : 1 uL  
 Ana. Date : 2020/8/24 10:50:53  
 Pro. Date : 2020/8/24 11:28:52  
 Sample Type : unknown  
 Analyst : System Administrator  
 Processor : System Administrator

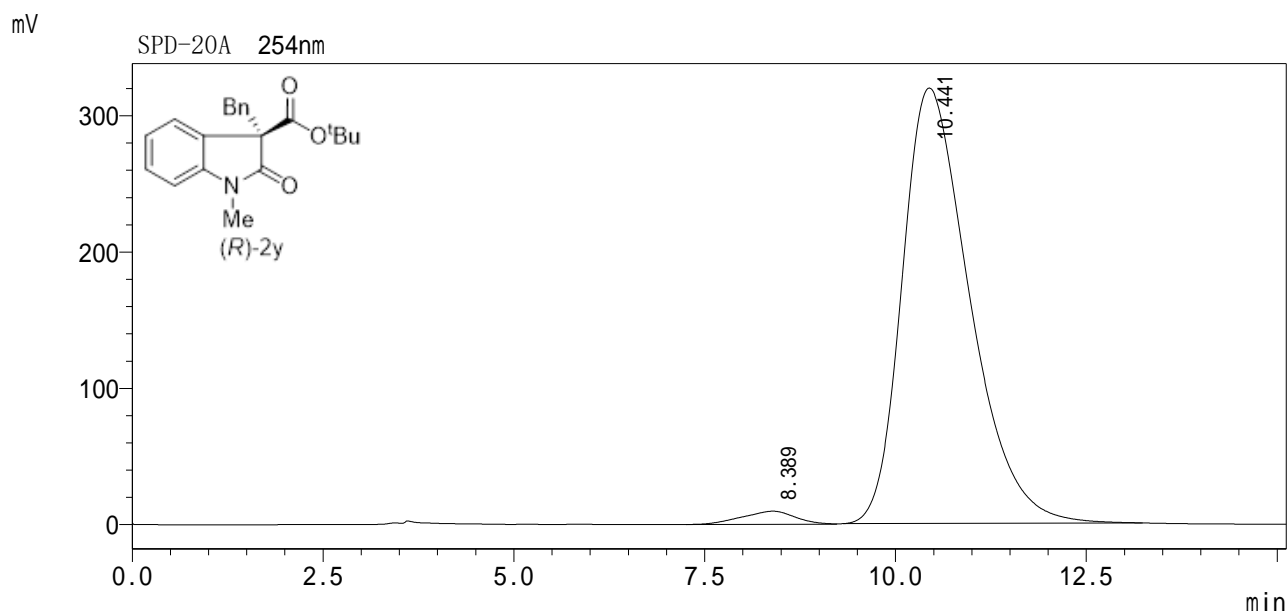

SPD-20A

| Entry | RT [min] | Area     | Height | Area%  |
|-------|----------|----------|--------|--------|
| 1     | 8.389    | 470420   | 9679   | 2.341  |
| 2     | 10.441   | 19620943 | 319508 | 97.659 |
| Sum   |          | 20091363 | 329187 |        |

SHIMADZU LabSolutions HPLC Report

< Sample information >

Sample name : dzjd012-bianyanglianRAC-OD-5%  
 Data name : 4--dzjd012-bianyanglianRAC-OD-5%.lcd  
 Acq. Method : OD-H-5%.lcm  
 Location : 1-1  
 Sample Type : unknown  
 : 1 uL  
 Ana. Date : 2020/9/25 10:33:41  
 Analyst : System Administrator  
 Pro. Date : 2020/9/25 11:28:42  
 Processor : System Administrator

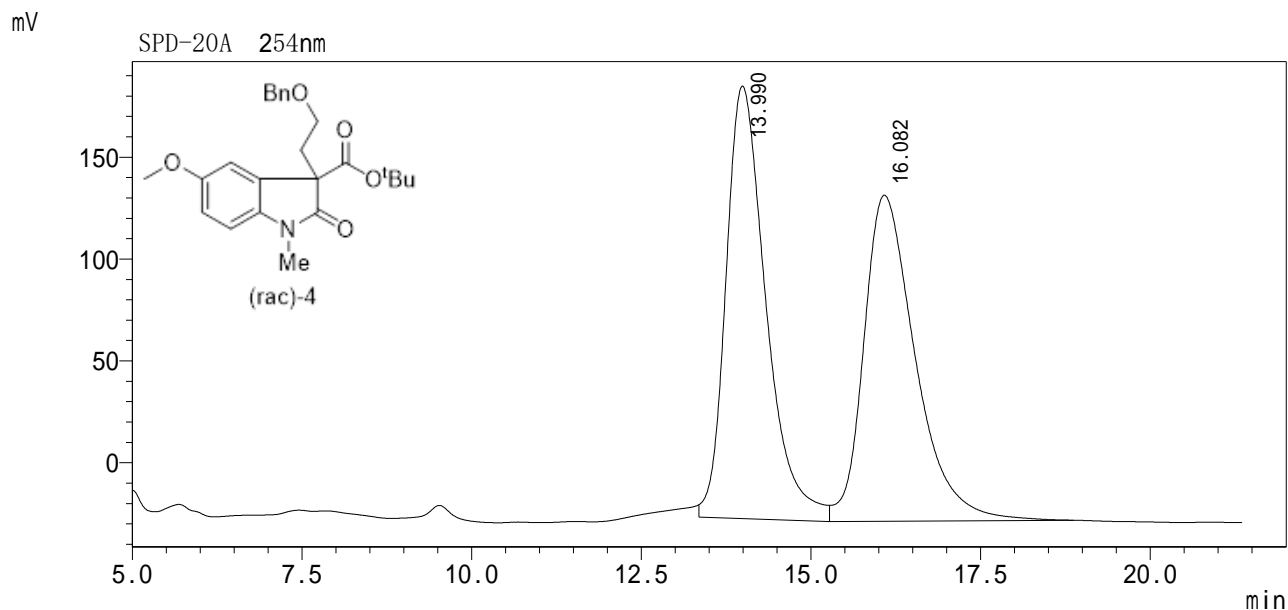

SPD-20A

| Entry | RT[min] | Area     | Height | Area%  |  |  |  |
|-------|---------|----------|--------|--------|--|--|--|
| 1     | 13.990  | 8703642  | 212299 | 50.707 |  |  |  |
| 2     | 16.082  | 8460909  | 160079 | 49.293 |  |  |  |
| Sum   |         | 17164551 | 372377 |        |  |  |  |

SHIMADZU LabSolutions HPLC Report

< Sample information >

Sample name : dzjd012-bianyanglianCHIRAL-OD-5%  
 Data name : 4--dzjd012-bianyanglianCHIRAL-OD-5%.lcd  
 Acq. Method : OD-H-5%.lcm  
 Location : 1-1  
 Sample Type : unknown  
 : 1 uL  
 Ana. Date : 2020/9/28 20:28:19  
 Analyst : System Administrator  
 Pro. Date : 2020/9/28 22:00:13  
 Processor : System Administrator

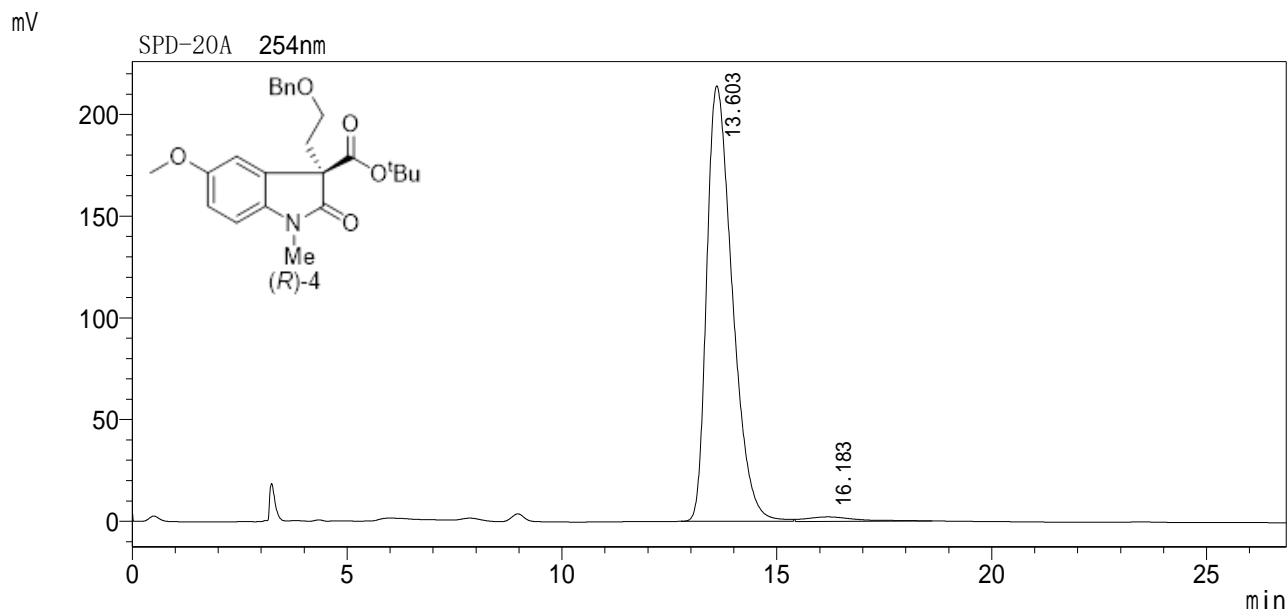

SPD-20A

| Entry | RT [min] | Area    | Height | Area%  |
|-------|----------|---------|--------|--------|
| 1     | 13.603   | 8850808 | 214016 | 98.063 |
| 2     | 16.183   | 174838  | 2190   | 1.937  |
| Sum   |          | 9025646 | 216206 |        |



SHIMADZU LabSolutions HPLC Report

< Sample information >

Sample name : dzjd021-3-erchunRAC-AS-25%  
 Data name : 5--dzjd021-3-erchunRAC-AS-25%.lcd  
 Acq. Method : AS-H-25%.lcm  
 Location : 1-1  
 Sample Type : unknown  
 : 1 uL  
 Ana. Date : 2020/10/12 9:21:57  
 Analyst : System Administrator  
 Pro. Date : 2020/10/12 9:32:55  
 Processor : System Administrator

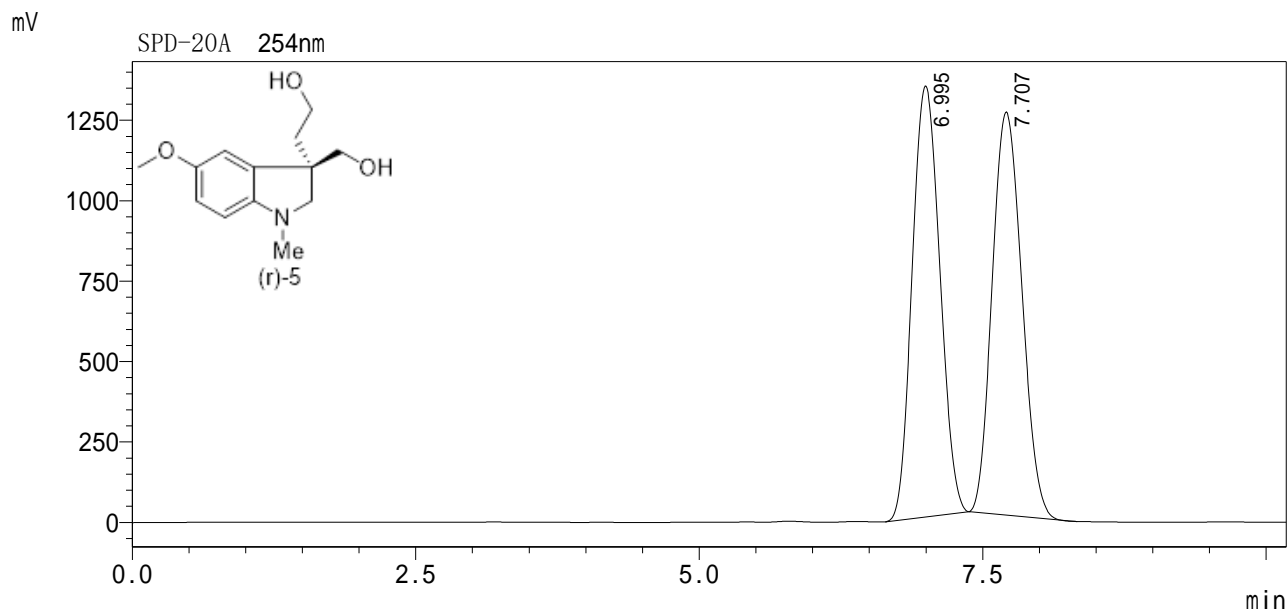

SPD-20A

| Entry | RT [min] | Area     | Height  | Area%  |
|-------|----------|----------|---------|--------|
| 1     | 6.995    | 22738055 | 1339587 | 49.985 |
| 2     | 7.707    | 22751624 | 1252787 | 50.015 |
| Sum   |          | 45489679 | 2592374 |        |

SHIMADZU LabSolutions HPLC Report

< Sample information >

Sample name : dzjd021-3-erchunCHIRAL-AS-25%  
 Data name : 5--dzjd021-3-erchunCHIRAL-AS-25%.lcd  
 Acq. Method : AS-H-25%.lcm  
 Location : 1-1  
 Sample Type : unknown  
 : 1 uL  
 Ana. Date : 2020/10/12 9:38:19  
 Analyst : System Administrator  
 Pro. Date : 2020/10/12 9:57:13  
 Processor : System Administrator

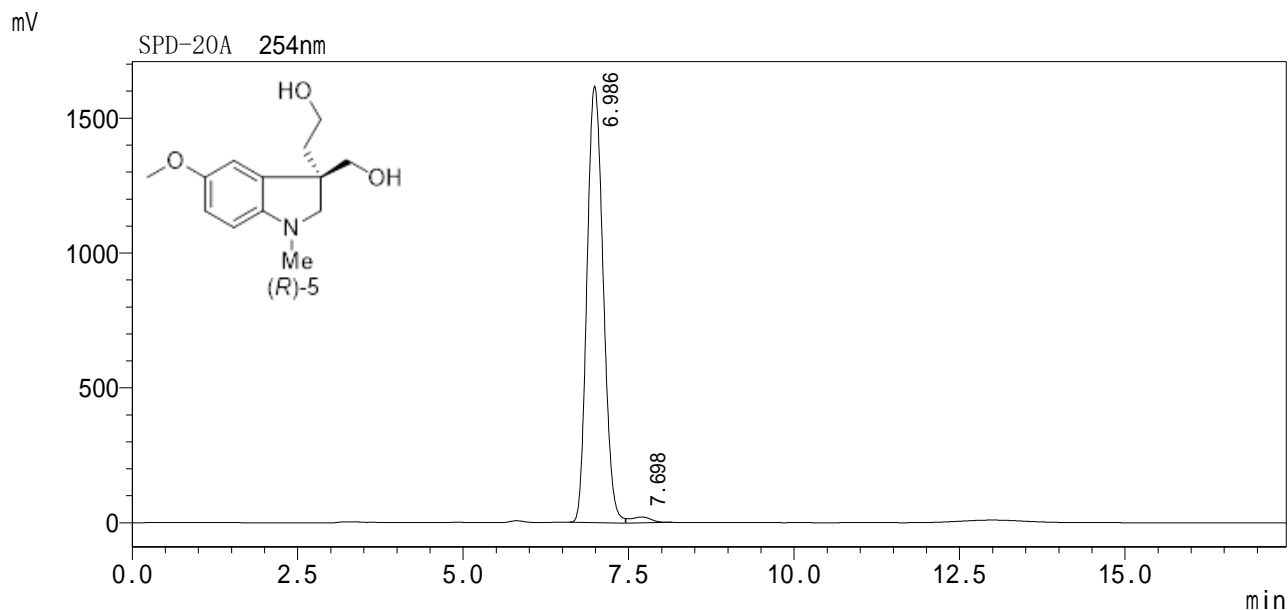

SPD-20A

| Entry | RT [min] | Area     | Height  | Area%  |
|-------|----------|----------|---------|--------|
| 1     | 6.986    | 27601443 | 1618792 | 98.291 |
| 2     | 7.698    | 480001   | 21797   | 1.709  |
| Sum   |          | 28081443 | 1640589 |        |

SHIMADZU LabSolutions HPLC Report

< Sample information >

Sample name : DZJD-guanyanghuanRAC-OD-1%  
 Data name : 6--DZJD-guanyanghuanRAC-OD-1%.lcd  
 Acq. Method : OD-H-1%.lcm  
 Location : 1-1  
 : 1 uL  
 Ana. Date : 2020/10/21 11:07:54  
 Pro. Date : 2020/10/21 11:30:26  
 Sample Type : unknown  
 Analyst : System Administrator  
 Processor : System Administrator

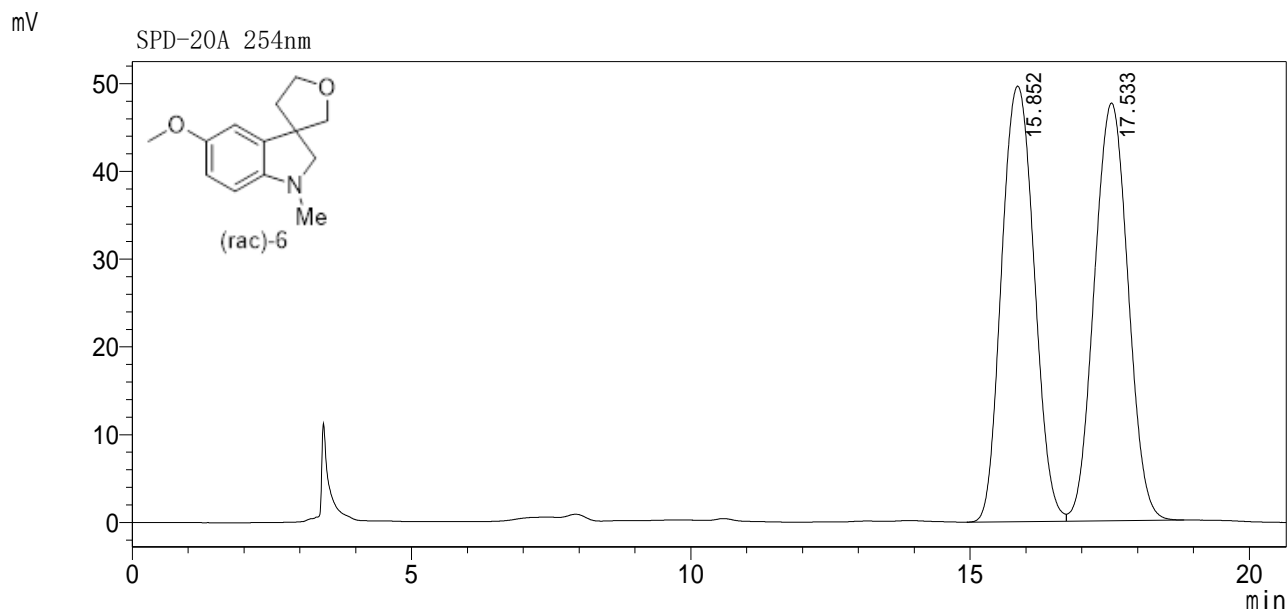

SPD-20A

| Entry | RT[min] | Area    | Height | Area%  |
|-------|---------|---------|--------|--------|
| 1     | 15.852  | 2020462 | 49637  | 50.248 |
| 2     | 17.533  | 2000494 | 47598  | 49.752 |
| Sum   |         | 4020956 | 97235  |        |

SHIMADZU LabSolutions HPLC Report

< Sample information >

Sample name : DZJD-guanyanghuanCHIRAL-OD-1%  
 Data name : 6--DZJD-guanyanghuanCHIRALOD-1%.lcd  
 Acq. Method : OD-H-1%.lcm  
 Location : 1-1  
 : 1 uL  
 Ana. Date : 2020/10/21 10:42:00  
 Pro. Date : 2020/10/21 11:29:32  
 Sample Type : unknown  
 Analyst : System Administrator  
 Processor : System Administrator

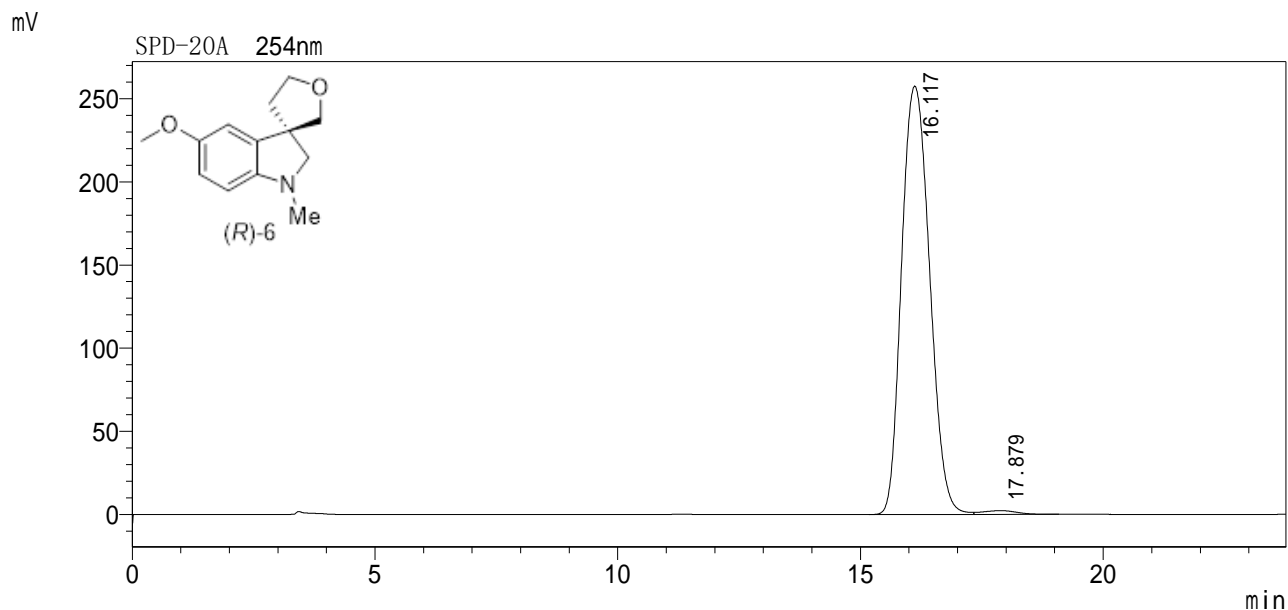

SPD-20A

| Entry | RT [min] | Area     | Height | Area%  |
|-------|----------|----------|--------|--------|
| 1     | 16.117   | 10345239 | 257634 | 98.957 |
| 2     | 17.879   | 109044   | 2230   | 1.043  |
| Sum   |          | 10454283 | 259864 |        |

SHIMADZU LabSolutions HPLC Report

< Sample information >

Sample name : DK-1047-2-OD-H-10%  
 Data name : DK-1047-2-OD-H-10%.lcd  
 Acq. Method : OD-H-10%.lcm  
 Location : 1-1  
 : 1 uL  
 Ana. Date : 2020/11/29 22:28:32  
 Pro. Date : 2020/11/29 22:49:21  
 Sample Type : unknown  
 Analyst : System Administrator  
 Processor : System Administrator

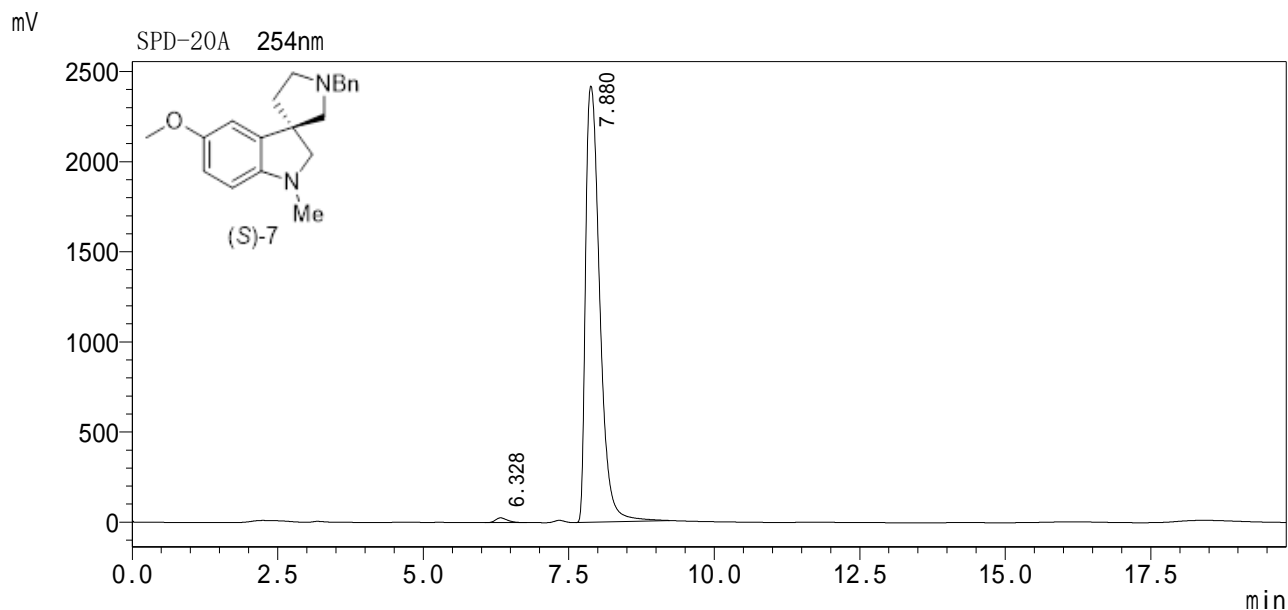

SPD-20A

| Entry | RT[min] | Area     | Height  | Area%  |  |  |  |
|-------|---------|----------|---------|--------|--|--|--|
| 1     | 6.328   | 374354   | 26468   | 0.907  |  |  |  |
| 2     | 7.880   | 40903836 | 2420330 | 99.093 |  |  |  |
| Sum   |         | 41278190 | 2446798 |        |  |  |  |

SHIMADZU  
LabSolutions HPLC Report

<Sample information>

Sample name : DK-1039-OD-H-10%  
 Data name : DK-1039-OD-H-10%.lcd  
 Acq. method : OD-H-10%.lcm  
 Location : 1-1  
 : 1 uL  
 Ana. Date : 2020/11/29 15:38:58  
 Pro. Date : 2020/11/29 16:08:14  
 Sample Type : unknown  
 Analyst : System Administrator  
 Processor : System Administrator

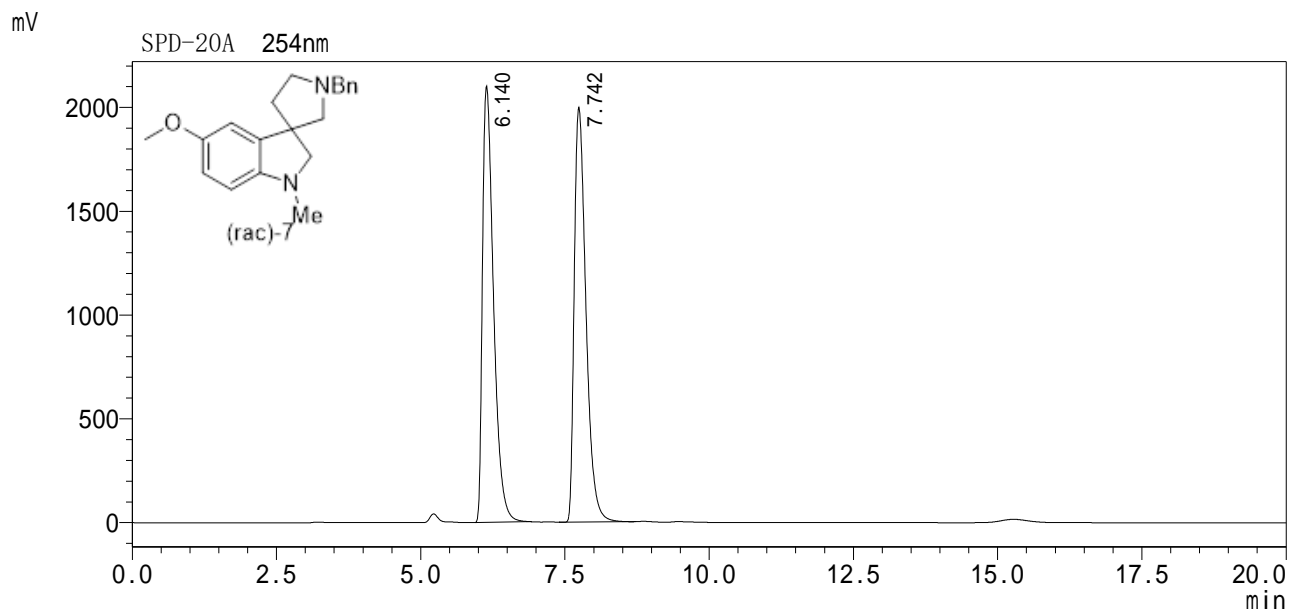

SPD-20A

| Entry | RT[min] | Area     | Height  | Area%  |
|-------|---------|----------|---------|--------|
| 1     | 6.140   | 28043430 | 2101263 | 49.854 |
| 2     | 7.742   | 28207640 | 1996963 | 50.146 |
| Sum   |         | 56251070 | 4098227 |        |
